# Supplementary material for: Microbes with higher metabolic independence are enriched in human gut microbiomes under stress
Source: eLife journal article supplement (doi:10.7554/elife.89862), 2023-09-08
Supplement: supp1 [file elife-89862-supp1-v1.zip]

## Sheet: a) Included Studies
Study	Sample group(s)	Used in analysis? (At least one sample passed sequencing depth threshold)	DOI	Study Topic	Country	Sample Type	Number of HEALTHY samples (pre-threshold)	Number of NONIBD samples (pre-threshold)	Number of IBD samples (pre-threshold)	Number of HEALTHY samples (post-threshold)	Number of NONIBD samples (post-threshold)	Number of IBD samples (post-threshold)	HEALTHY / NONIBD cohort profile/exclusions	Cohort details (quoted from study)	Fecal sampling details (quoted from study)	DNA extraction details (quoted from study)	Sequencing details (quoted from study)
Chatelier_2013	HEALTHY	Yes	10.1038/nature12506	Obesity	Denmark	fecal metagenome	284	0	0	151	0	0	HEALTHY. Some are obese. No GI disease, immune medications, type-2 diabetes, or antibiotics	individuals with BMI < 25 kg m−2 or BMI > 30 kg m−2 at year five in the Inter99 study were randomly selected from track records. They had no known gastrointestinal disease, no previously bariatric surgery, no medications known to affect the immune system, and no antibiotics 2 months before faecal sample collection. Individuals with type-2 diabetes at the day of examination were excluded.	Stool samples were obtained at the homes of each participant and samples were immediately frozen in their home freezer. Frozen samples were delivered to Steno Diabetes Center using insulating polystyrene foam containers, and stored at −80 °C until analysis. The time span from sampling to delivery at the Steno Diabetes Center was aimed to be as short as possible and no more than 48 h.	A frozen aliquot (200 mg) of each faecal sample was suspended in 250 μl of guanidine thiocyanate, 0.1 M Tris, pH 7.5, and 40 μl of 10% N-lauroyl sarcosine. Then, DNA extraction was conducted as previously described [26].	DNA library preparation followed the manufacturer’s instruction (Illumina). We used the workflow indicated by the provider to perform cluster generation, template hybridization, isothermal amplification, linearization, blocking and denaturing and hybridization of the sequencing primers. The base-calling pipeline (version IlluminaPipeline-0.3) was used to process the raw fluorescent images and cal…
Feng_2015	HEALTHY, NONIBD	Yes	10.1038/ncomms7528	Colorectal cancer	Austria	fecal metagenome	62	91	0	29	65	0	HEALTHY - Definition of "Healthy control" unspecified. No antibiotics or probiotics. NONIBD - colorectal cancer (carcinoma or adenoma)	"Data from 147 Caucasians aged between 45–86 years were included in the initial analysis, including 57 healthy controls (24 females and 33 males), 44 advanced adenoma (22 females and 22 males) and 46 carcinoma (18 females and 28 males)." "The study was conducted both in participants (ages 45–86) of a health screening programme according to national screening recommendations for CRC [49] as well a…	Fresh stool samples were collected from all patients and subjects. Samples were mechanically homogenized with a sterile spatula, then four aliquots were taken, using the Sarstedt stool sampling system (Sarstedt, Nümbrecht, Germany). Each aliquot contained 1 g of stool in a sterile 12 ml cryovial. Faecal aliquots were then stored at home freezers at −20 °C and transported to the laboratory within …	NA	Paired-end metagenomic sequencing was performed on the Illumina platform (insert size 350 bp, read length 100 bp)
Franzosa_2018	IBD, NONIBD	Yes	10.1038/s41564-018-0306-4	IBD	USA / Netherlands	fecal metagenome	0	56	164 (88 CD, 76 UC)	0	11	30 (19 CD, 11 UC)	NONIBD. May include those with benign or non-specific symptoms	PRISM is a referral centre-based, prospective cohort of IBD patients; 161 adult patients (>18 years old) enrolled in PRISM and diagnosed with CD, UC and non-IBD (control) were selected for this study, with diagnoses based on standard endoscopic, radiographical and histological criteria. The validation cohort consisted of 65 patients enrolled in two distinct studies from the Netherlands; 22 contro…	PRISM patient stool samples were collected at the MGH gastroenterology clinic and stored at −80 °C before DNA was extracted. For the validation cohort: a single stool sample was collected at home and then frozen within 15 min in a conventional freezer. A research nurse visited all participants at home to collect home-frozen stool samples, which were then transported and stored at −80 °C. The stoo…	Stool DNA extractions were carried out using the QIAamp DNA Stool Mini Kit (QIAGEN). Whole-genome shotgun libraries were prepared by quantifying metagenomic DNA samples with the Quant-iT PicoGreen dsDNA Assay (Thermo Fisher Scientific) and normalized to a concentration of 50 pg μl−1.	Illumina sequencing libraries were prepared from 100–250 pg of DNA using the Nextera XT DNA Library Preparation Kit (Illumina) according to the manufacturer’s recommended protocol, with reaction volumes scaled accordingly. Batches of 24, 48 or 96 libraries were pooled by transferring equal volumes of each library using an Echo 550 Liquid Handler (Labcyte). Insert sizes and concentrations for each…
Lloyd-Price_2019	IBD, NONIBD	Yes	10.1038/s41586-019-1237-9	IBD	USA	fecal metagenome	0	362	965 (596 CD, 369 UC)	0	0	3 (2 CD, 1 UC)	NONIBD. May include those with benign or non-specific symptoms	Five medical centres participated in the IBDMDB: Cincinnati Children’s Hospital, Emory University Hospital, Massachusetts General Hospital, Massachusetts General Hospital for Children, and Cedars-Sinai Medical Center. Patients were approached for potential recruitment upon presentation for routine age-related colorectal cancer screening, work up of other gastrointestinal (GI) symptoms, or suspect…	Stool specimens were collected both at the clinical visits and every two weeks by mail using a home collection kit developed for the project (http://ibdmdb.org/protocols) and previously validated46. Participants first deposited stool into a collection bowl suspended over a commode. They then collected two aliquots using a scoop to transfer stool into two Sarstedt 80.623 tubes: one with approximat…	Total nucleic acid was extracted from one aliquot of each assayed stool sample via the Chemagic MSM I with the Chemagic DNA Blood Kit-96 from Perkin Elmer. This kit combines chemical and mechanical lysis with magnetic bead-based purification. Prior to extraction on the MSM-I, TE buffer, lysozyme, proteinase K, and RLT buffer with beta-mercaptoethanol were added to each stool sample. The stool lys…	Metagenomic DNA samples were quantified by Quant-iT PicoGreen dsDNA Assay (Life Technologies) and normalized to a concentration of 50 pg/ul. Illumina sequencing libraries were prepared from 100–250 pg DNA using the Nextera XT DNA Library Preparation kit (Illumina) according to the manufacturer’s recommended protocol, with reaction volumes scaled accordingly. Prior to sequencing, libraries were po…
Qin_2012	HEALTHY	No	10.1038/nature11450	Type 2 Diabetes	China	fecal metagenome	74	0	0	0	0	0	HEALTHY. Definition of "Healthy control" unspecified. No antibiotics. We use only the control samples (no type 2 diabetes).	Faecal samples were obtained from 368 volunteers (345 samples for MGWAS and 23 additional samples for T2D classification) after signing an informed consent form. The individuals had not received any antibiotic treatment within 2 months before sample collection.	The samples were frozen immediately	and underwent DNA extraction using standard methods	Illumina GAIIx and HiSeq 2000 were used to sequence the samples. We constructed a paired-end library with insert size of ∼350 base pairs for every sample. Adaptor contamination and low-quality reads were discarded from the raw reads, and the remaining reads were filtered to eliminate human host DNA based on the human genome reference (hg18)
Quince_2015	HEALTHY, IBD	No	10.1038/ajg.2015.357	Crohn's Disease (CD)	Switzerland	fecal metagenome	13	0	56 (CD)	0	0	0	HEALTHY. No history of IBD or antibiotics	Fecal samples were collected from 23 children (males: n=13; 6.9–14.7 years) with active CD (Montreal classification; Disease location: L2, n=3; L2+L4, n=4; L3, n=3; L3+L4, n=13; Disease behavior: B1, n=20; B2, n=2; B3, n=1) and for 15 of these (11 newly diagnosed), with at least two consecutive samples, during 8 weeks of EEN (Modulen, Nestle, Vevey, Switzerland) as described previously (6). A max…	NA (might be in SI)	NA (might be in SI)	Shotgun metagenome samples, indicative of microbiota genetic functional capacity, were prepared for 69 of the samples (CD, n=56; Healthy, n=13) with the Nextera XT Prep Kit (Illumina, FC-131–1096, UK) and the Illumina dual-barcoding Nextera XT Index kit (Illumina, FC-131–1002, UK). Detailed description of the shotgun metagenome sequencing is available in Supplementary Methods. Clusters were gener…
Rampelli_2015	HEALTHY	No	10.1016/j.cub.2015.04.055	Hunter-gatherer vs Western lifestyle/diet	Italy	fecal metagenome	11	0	0	0	0	0	HEALTHY. No antibiotics, probiotics, or prebiotics. We use only Italian (Western) samples.	Fecal aliquots sequenced for this study came from the same original samples from Schnorr et al. [10]. 11 Italian adults (age 20–40 years) living in and around Bologna. From Schnorr et al: Sixteen Italian adults (age: 20–40 years) were recruited for this study in the greater Bologna metropolitan area. All subjects were healthy and had not received antibiotics, probiotics or prebiotics for at least…	Sample collection and storage procedures are reported in full in Schnorr et al. [10] (see the Supplemental Experimental Procedures).
Raymond_2015	HEALTHY	Yes	10.1038/ismej.2015.148	Antibiotic exposure	Canada	fecal metagenome	23	0	0	22	0	0	HEALTHY. No GI disease, chronic illness, antibiotics, GI- or immune system-related medicine, or abnormal BMI. We use only samples taken before antibiotic treatment.	Healthy volunteers recruited in the Quebec City region (Canada) were aged between 21 and 35 years and had normal intestinal transit. Excluded if (partial list): Antibiotic therapy or history of hospitalization (>24 h) in the past 12 months prior to the study, Any gastrointestinal or underlying pathology, Any chronic illness, Any infection requiring chemo/antibiotic therapy, Diarrhoeal disease (Wo…	Samples were collected following human microbiome project protocols. All samples were brought to the laboratory within 2 h of collection and placed immediately in an anaerobic chamber for processing. Stool aspect was classified according to the Bristol scale (Lewis and Heaton, 1997). Stools were aliquoted and stored at −80 °C.	Genomic DNA was extracted from 500 mg aliquots of each of the 72 frozen stool specimens using the MO BIO PowerMax Soil DNA Extraction Kit (MO BIO Laboratories, Carlsbad, CA, USA) following a modified human microbiome project procedure (Aagaard et al., 2013).	Sequencing libraries were prepared using the Nextera Sample Preparation Kit (Illumina, San Diego, CA, USA) with 50 ng of purified DNA. Dual indices were added during library preparation. Libraries were validated using Agilent Bioanalyzer 2100 high sensitivity DNA chips (Agilent Technologies, Santa Clara, CA, USA) and were quantified again with QuantiFluor. Libraries were diluted to a 2 nM concent…
Schirmir_2018	IBD, NONIBD	Yes	10.1038/s41564-017-0089-z	IBD	USA	fecal metagenome	0	65	235 (151 CD, 84 UC)	0	2	4 (3 CD, 1 UC)	NONIBD. May include those with benign or non-specific symptoms. No antibiotics, no GI infection, no indeterminate colitis, no immune-mediated disease.	Patients at Massachusetts General Hospital (as part of the Prospective Registry in IBD Study (PRISM)), Emory University and Cincinnati Children’s Hospital Medical Center, with a suspected diagnosis of IBD were approached for participation in the new-onset and paediatric portion of the study. Patients were consented prior to a screening colonoscopy, which separated them into patients with confirme…	Stool samples were self-collected biweekly for 1 year from each patient according to the protocol established in ref.47, starting from the baseline visit.	DNA was extracted from 300 samples spanning all 117 participants	Illumina HiSeq sequencing yielded a total of 4.59 giga nucleotides (Gnt) and 1.06 Gnt of paired-end reads (2 × 100 nt) of metagenomic and metatranscriptomic sequencing, respectively.
University_of_Sydney_2016	HEALTHY	Yes	https://www.ncbi.nlm.nih.gov/bioproject/PRJEB6092/	Korean vs Western diet	Australia	fecal metagenome	12	0	0	8	0	0	HEALTHY. No details provided, high BMI/obesity likely. We use only pre-diet samples.	Two diets, Korean and Western diet. Each 6 individuals, half of which loose high weight and half of which loose little weight. Fecal samples taken before and after diet (3 months).	NA (no published study)	NA (no published study)	NA (no published study)
Vineis_2016	IBD	Yes	10.1128/mBio.01713-16	Pouchitis	USA	ileal pounch luminal contents	0	0	95 (UC)	0	0	64	NA (no healthy/nonibd samples)	Twenty-two patients recruited at the University of Chicago Medical Center had a previously confirmed diagnosis of ulcerative colitis (UC) and underwent total proctocolectomy with ileal pouch anal anastomosis (IPAA) as standard of care. Each patient underwent endoscopic evaluation of the ileal pouch (pouchoscopy) for collection of luminal contents and mucosal brushings in the ileal pouch.	Patients were sampled (luminal contents or mucosal brush) without bowel lavage or preparation 2 weeks, 4 weeks, 8 weeks, and then every 4 months after pouch functionalization for a period of 2 years.	NA	A Covaris S220 ultrasonicator sheared 100 to 1,000 ng of DNA for each cultivar to 600 bp. Library construction followed protocols for the NuGEN Ovation Ultralow DNA library preparation or Illumina PCR-free library preparation prior to sequencing on a HiSeq Illumina platform. Metagenomic libraries were constructed for each of the 96 luminal (M) samples and three brush (GG) samples from the mucosa.…
Wen_2017	HEALTHY	Yes	10.1186/s13059-017-1271-6	Ankylosing spondylitis	China	fecal metagenome	114	0	0	17	0	0	HEALTHY. No GI disease, no history of IBD or rheumatic disease, no antibiotics, no systemic disease or hepatitis. We use only the control samples (no AS).	a total of 211 individuals (97 patients with AS and 114 healthy controls) were enrolled in this study from three hospitals (Zhejiang Provincial Hospital of Traditional Chinese Medicine, the Second Affiliated Hospital of Zhejiang Chinese Medical University, and Zhejiang Province People Hospital). The 97 individuals (57 men, 40 women) aged 14–71 years with AS were diagnosed on the basis of the modi…	All of the fresh fecal samples from the AS patients were transferred immediately from the hospital to the laboratory [20] and divided into ten aliquots of 200 mg. All samples were stored at –80 °C until DNA extraction.	The DNA was extracted from each frozen fecal sample (200 mg) using the phenol/trichloromethane DNA extraction method.	TruSeq DNA HT Sample Prep Kit was used for library construction. All the samples were sequenced in the Illumina Hiseq 2000 in BGI-Shenzhen and PE100 sequencing strategy was used; each sequencing run had 9–11 samples and the sequencing depth of each sample must be at least 3 Gbp. The insert sizes of all samples were in the range of 275–450 bp.
Xie_2016	HEALTHY	Yes	10.1016/j.cels.2016.10.004	Twin gut microbiome differences	England	fecal metagenome	211	0	0	2	0	0	HEALTHY. It is unclear what "unselected for any phenotypes" means. TwinsUK website has listed phenotypes from "has ever been sunburned" to "Religion". But they are probably healthy.	The study included 35 MZ and 92 DZ female twin pairs with a mean age of 61 years (range 36-80 years of age), who were unselected for any phenotypes and are representative of the participants within the TwinsUK database. None of the women was pregnant or lactating at the time of sampling. Most of them were postmenopausal.	Fecal samples were collected by the participates and refrigerated at home for no more than 2 days, before they were taken to King’s College London for storage at −80°C.	The samples were transported on dry ice to Cornell University for DNA extraction using the PowerSoil kit (MoBio). 1 MZ and 3 DZ samples failed to yield an Illumina library.	Paired-end metagenomic sequencing was performed on the Illumina HiSeq2000 platform with a read length of 100 bp (insert size 350 bp).

## Sheet: b) Analyzed Samples
Sample	Diagnosis	Study	Study DOI	Group	R1 num reads	R2 num reads	Num populations
C3002C4_MGX	CD	Schirmir_2018	10.1038/s41564-017-0089-z	IBD	26083329	26083329	9
C3013C2_MGX	UC	Schirmir_2018	10.1038/s41564-017-0089-z	IBD	33111816	33111816	10
CRC_ADENOMA	CD	Schirmir_2018	10.1038/s41564-017-0089-z	IBD	28014234	28014234	11
P6009C1_MGX	CD	Schirmir_2018	10.1038/s41564-017-0089-z	IBD	35896077	35896077	14
IBDMDB_CD_MSM6J2IY	CD	Lloyd-Price_2019	10.1038/s41586-019-1237-9	IBD	26742707	26742707	12
IBDMDB_CD_PSM7J199	CD	Lloyd-Price_2019	10.1038/s41586-019-1237-9	IBD	26880564	26880564	8
IBDMDB_UC_PSMA267J	UC	Lloyd-Price_2019	10.1038/s41586-019-1237-9	IBD	25529831	25529831	8
G48777_CD	CD	Franzosa_2018	10.1038/s41564-018-0306-4	IBD	52217513	52217513	28
G48780_CD	CD	Franzosa_2018	10.1038/s41564-018-0306-4	IBD	43184869	43184869	41
G48784_UC	UC	Franzosa_2018	10.1038/s41564-018-0306-4	IBD	51803597	51803597	51
G48791_UC	UC	Franzosa_2018	10.1038/s41564-018-0306-4	IBD	63500783	63500783	74
G48794_UC	UC	Franzosa_2018	10.1038/s41564-018-0306-4	IBD	43979666	43979666	61
G48795_CD	CD	Franzosa_2018	10.1038/s41564-018-0306-4	IBD	43578683	43578683	38
G48796_CD	CD	Franzosa_2018	10.1038/s41564-018-0306-4	IBD	48054304	48054304	53
G48799_UC	UC	Franzosa_2018	10.1038/s41564-018-0306-4	IBD	42863493	42863493	47
G48802_UC	UC	Franzosa_2018	10.1038/s41564-018-0306-4	IBD	43665478	43665478	44
G48804_CD	CD	Franzosa_2018	10.1038/s41564-018-0306-4	IBD	45018252	45018252	12
G48805_CD	CD	Franzosa_2018	10.1038/s41564-018-0306-4	IBD	45445784	45445784	3
G48806_CD	CD	Franzosa_2018	10.1038/s41564-018-0306-4	IBD	26911621	26911621	13
G48807_CD	CD	Franzosa_2018	10.1038/s41564-018-0306-4	IBD	55422264	55422264	60
G48810_CD	CD	Franzosa_2018	10.1038/s41564-018-0306-4	IBD	40940291	40940291	32
G48812_UC	UC	Franzosa_2018	10.1038/s41564-018-0306-4	IBD	51269390	51269390	52
G48814_UC	UC	Franzosa_2018	10.1038/s41564-018-0306-4	IBD	42292961	42292961	19
G48815_CD	CD	Franzosa_2018	10.1038/s41564-018-0306-4	IBD	45472695	45472695	32
G48817_CD	CD	Franzosa_2018	10.1038/s41564-018-0306-4	IBD	35340933	35340933	70
G48819_CD	CD	Franzosa_2018	10.1038/s41564-018-0306-4	IBD	46916174	46916174	12
G48820_CD	CD	Franzosa_2018	10.1038/s41564-018-0306-4	IBD	56425999	56425999	12
G48821_UC	UC	Franzosa_2018	10.1038/s41564-018-0306-4	IBD	43202937	43202937	11
G48822_UC	UC	Franzosa_2018	10.1038/s41564-018-0306-4	IBD	41069985	41069985	9
G48823_CD	CD	Franzosa_2018	10.1038/s41564-018-0306-4	IBD	40883067	40883067	40
G48827_CD	CD	Franzosa_2018	10.1038/s41564-018-0306-4	IBD	43510065	43510065	31
G48832_UC	UC	Franzosa_2018	10.1038/s41564-018-0306-4	IBD	37683143	37683143	33
G48836_UC	UC	Franzosa_2018	10.1038/s41564-018-0306-4	IBD	35088804	35088804	13
G48838_CD	CD	Franzosa_2018	10.1038/s41564-018-0306-4	IBD	47828503	47828503	42
G48839_CD	CD	Franzosa_2018	10.1038/s41564-018-0306-4	IBD	49984621	49984621	38
G48841_CD	CD	Franzosa_2018	10.1038/s41564-018-0306-4	IBD	60036513	60036513	17
G48842_CD	CD	Franzosa_2018	10.1038/s41564-018-0306-4	IBD	61830495	61830495	32
AST0002	HEALTHY	Feng_2015	10.1038/ncomms7528	HEALTHY	32474886	32474886	55
AST0003	HEALTHY	Feng_2015	10.1038/ncomms7528	HEALTHY	29839288	29839288	47
AST0005	HEALTHY	Feng_2015	10.1038/ncomms7528	HEALTHY	25513317	25513317	33
AST0019	HEALTHY	Feng_2015	10.1038/ncomms7528	HEALTHY	25384083	25384083	41
AST0024	HEALTHY	Feng_2015	10.1038/ncomms7528	HEALTHY	28603351	28603351	52
AST0025	HEALTHY	Feng_2015	10.1038/ncomms7528	HEALTHY	28854500	28854500	47
AST0026	HEALTHY	Feng_2015	10.1038/ncomms7528	HEALTHY	27980088	27980088	41
AST0029	HEALTHY	Feng_2015	10.1038/ncomms7528	HEALTHY	26484125	26484125	39
AST0031	HEALTHY	Feng_2015	10.1038/ncomms7528	HEALTHY	31034101	31034101	41
AST0033	HEALTHY	Feng_2015	10.1038/ncomms7528	HEALTHY	29365450	29365450	19
AST0035	HEALTHY	Feng_2015	10.1038/ncomms7528	HEALTHY	29307692	29307692	24
AST0040	HEALTHY	Feng_2015	10.1038/ncomms7528	HEALTHY	25741116	25741116	34
AST0050	HEALTHY	Feng_2015	10.1038/ncomms7528	HEALTHY	27144355	27144355	16
AST0055	HEALTHY	Feng_2015	10.1038/ncomms7528	HEALTHY	32818713	32818713	48
AST0057	HEALTHY	Feng_2015	10.1038/ncomms7528	HEALTHY	25549375	25549375	9
AST0058	HEALTHY	Feng_2015	10.1038/ncomms7528	HEALTHY	29099906	29099906	23
AST0060	HEALTHY	Feng_2015	10.1038/ncomms7528	HEALTHY	29786700	29786700	39
AST0061	HEALTHY	Feng_2015	10.1038/ncomms7528	HEALTHY	27165858	27165858	54
AST0090	HEALTHY	Feng_2015	10.1038/ncomms7528	HEALTHY	28090317	28090317	35
AST0092	HEALTHY	Feng_2015	10.1038/ncomms7528	HEALTHY	28370594	28370594	21
AST0093	HEALTHY	Feng_2015	10.1038/ncomms7528	HEALTHY	26625167	26625167	32
AST0100	HEALTHY	Feng_2015	10.1038/ncomms7528	HEALTHY	27786037	27786037	22
AST0104	HEALTHY	Feng_2015	10.1038/ncomms7528	HEALTHY	28554120	28554120	59
AST0113	HEALTHY	Feng_2015	10.1038/ncomms7528	HEALTHY	32723661	32723661	47
AST0118	HEALTHY	Feng_2015	10.1038/ncomms7528	HEALTHY	30665000	30665000	46
AST0140	HEALTHY	Feng_2015	10.1038/ncomms7528	HEALTHY	26879103	26879103	38
AST0148	HEALTHY	Feng_2015	10.1038/ncomms7528	HEALTHY	27127751	27127751	48
AST0149	HEALTHY	Feng_2015	10.1038/ncomms7528	HEALTHY	25133862	25133862	37
AST0153	HEALTHY	Feng_2015	10.1038/ncomms7528	HEALTHY	25550387	25550387	45
AUS0002	HEALTHY	University_of_Sydney_2016	https://www.ncbi.nlm.nih.gov/bioproject/PRJEB6092/	HEALTHY	27024458	27024458	37
AUS0004	HEALTHY	University_of_Sydney_2016	https://www.ncbi.nlm.nih.gov/bioproject/PRJEB6092/	HEALTHY	31189954	31189954	26
AUS0014	HEALTHY	University_of_Sydney_2016	https://www.ncbi.nlm.nih.gov/bioproject/PRJEB6092/	HEALTHY	38381490	38381490	35
AUS0016	HEALTHY	University_of_Sydney_2016	https://www.ncbi.nlm.nih.gov/bioproject/PRJEB6092/	HEALTHY	34973587	34973587	27
AUS0018	HEALTHY	University_of_Sydney_2016	https://www.ncbi.nlm.nih.gov/bioproject/PRJEB6092/	HEALTHY	30555989	30555989	37
AUS0020	HEALTHY	University_of_Sydney_2016	https://www.ncbi.nlm.nih.gov/bioproject/PRJEB6092/	HEALTHY	30964264	30964264	32
AUS0022	HEALTHY	University_of_Sydney_2016	https://www.ncbi.nlm.nih.gov/bioproject/PRJEB6092/	HEALTHY	40667943	40667943	51
AUS0024	HEALTHY	University_of_Sydney_2016	https://www.ncbi.nlm.nih.gov/bioproject/PRJEB6092/	HEALTHY	29184844	29184844	45
CAN0001	HEALTHY	Raymond_2015	10.1038/ismej.2015.148	HEALTHY	74778765	74778765	44
CAN0002	HEALTHY	Raymond_2015	10.1038/ismej.2015.148	HEALTHY	41652505	41652505	19
CAN0003	HEALTHY	Raymond_2015	10.1038/ismej.2015.148	HEALTHY	88901684	88901684	56
CAN0004	HEALTHY	Raymond_2015	10.1038/ismej.2015.148	HEALTHY	59584153	59584153	25
CAN0005	HEALTHY	Raymond_2015	10.1038/ismej.2015.148	HEALTHY	40008043	40008043	18
CAN0006	HEALTHY	Raymond_2015	10.1038/ismej.2015.148	HEALTHY	102961302	102961302	49
CAN0007	HEALTHY	Raymond_2015	10.1038/ismej.2015.148	HEALTHY	48215511	48215511	62
CAN0009	HEALTHY	Raymond_2015	10.1038/ismej.2015.148	HEALTHY	40000000	40000000	32
CAN0010	HEALTHY	Raymond_2015	10.1038/ismej.2015.148	HEALTHY	44300355	44300355	21
CAN0011	HEALTHY	Raymond_2015	10.1038/ismej.2015.148	HEALTHY	69120664	69120664	41
CAN0012	HEALTHY	Raymond_2015	10.1038/ismej.2015.148	HEALTHY	77459579	77459579	63
CAN0013	HEALTHY	Raymond_2015	10.1038/ismej.2015.148	HEALTHY	44000000	44000000	40
CAN0014	HEALTHY	Raymond_2015	10.1038/ismej.2015.148	HEALTHY	62160581	62160581	51
CAN0015	HEALTHY	Raymond_2015	10.1038/ismej.2015.148	HEALTHY	72000000	72000000	50
CAN0016	HEALTHY	Raymond_2015	10.1038/ismej.2015.148	HEALTHY	42304984	42304984	43
CAN0017	HEALTHY	Raymond_2015	10.1038/ismej.2015.148	HEALTHY	56000000	56000000	47
CAN0018	HEALTHY	Raymond_2015	10.1038/ismej.2015.148	HEALTHY	64972241	64972241	31
CAN0019	HEALTHY	Raymond_2015	10.1038/ismej.2015.148	HEALTHY	52000000	52000000	8
CAN0020	HEALTHY	Raymond_2015	10.1038/ismej.2015.148	HEALTHY	101861725	101861725	40
CAN0021	HEALTHY	Raymond_2015	10.1038/ismej.2015.148	HEALTHY	49731814	49731814	49
CAN0022	HEALTHY	Raymond_2015	10.1038/ismej.2015.148	HEALTHY	79091510	79091510	37
CAN0023	HEALTHY	Raymond_2015	10.1038/ismej.2015.148	HEALTHY	51485148	51485148	10
CHI0106	HEALTHY	Wen_2017	10.1186/s13059-017-1271-6	HEALTHY	27326461	27326461	28
CHI0111	HEALTHY	Wen_2017	10.1186/s13059-017-1271-6	HEALTHY	37429720	37429720	44
CHI0116	HEALTHY	Wen_2017	10.1186/s13059-017-1271-6	HEALTHY	29671415	29671415	19
CHI0132	HEALTHY	Wen_2017	10.1186/s13059-017-1271-6	HEALTHY	41169292	41169292	49
CHI0133	HEALTHY	Wen_2017	10.1186/s13059-017-1271-6	HEALTHY	28258918	28258918	22
CHI0138	HEALTHY	Wen_2017	10.1186/s13059-017-1271-6	HEALTHY	33807889	33807889	21
CHI0140	HEALTHY	Wen_2017	10.1186/s13059-017-1271-6	HEALTHY	30612103	30612103	39
CHI0141	HEALTHY	Wen_2017	10.1186/s13059-017-1271-6	HEALTHY	45972375	45972375	29
CHI0143	HEALTHY	Wen_2017	10.1186/s13059-017-1271-6	HEALTHY	28801401	28801401	18
CHI0145	HEALTHY	Wen_2017	10.1186/s13059-017-1271-6	HEALTHY	28162355	28162355	18
CHI0154	HEALTHY	Wen_2017	10.1186/s13059-017-1271-6	HEALTHY	28915894	28915894	34
CHI0162	HEALTHY	Wen_2017	10.1186/s13059-017-1271-6	HEALTHY	27962392	27962392	33
CHI0164	HEALTHY	Wen_2017	10.1186/s13059-017-1271-6	HEALTHY	38122227	38122227	23
CHI0165	HEALTHY	Wen_2017	10.1186/s13059-017-1271-6	HEALTHY	31068427	31068427	20
CHI0167	HEALTHY	Wen_2017	10.1186/s13059-017-1271-6	HEALTHY	42678871	42678871	24
CHI0168	HEALTHY	Wen_2017	10.1186/s13059-017-1271-6	HEALTHY	26792311	26792311	16
CHI0182	HEALTHY	Wen_2017	10.1186/s13059-017-1271-6	HEALTHY	31493113	31493113	37
DEN0001	HEALTHY	Chatelier_2013	10.1038/nature12506	HEALTHY	44340541	44340541	66
DEN0003	HEALTHY	Chatelier_2013	10.1038/nature12506	HEALTHY	42914024	42914024	33
DEN0005	HEALTHY	Chatelier_2013	10.1038/nature12506	HEALTHY	44805852	44805852	47
DEN0007	HEALTHY	Chatelier_2013	10.1038/nature12506	HEALTHY	45883744	45883744	33
DEN0010	HEALTHY	Chatelier_2013	10.1038/nature12506	HEALTHY	48028606	48028606	54
DEN0011	HEALTHY	Chatelier_2013	10.1038/nature12506	HEALTHY	49333495	49333495	69
DEN0012	HEALTHY	Chatelier_2013	10.1038/nature12506	HEALTHY	27184952	27184952	8
DEN0017	HEALTHY	Chatelier_2013	10.1038/nature12506	HEALTHY	46336940	46336940	30
DEN0018	HEALTHY	Chatelier_2013	10.1038/nature12506	HEALTHY	46018505	46018505	55
DEN0021	HEALTHY	Chatelier_2013	10.1038/nature12506	HEALTHY	43636252	43636252	46
DEN0022	HEALTHY	Chatelier_2013	10.1038/nature12506	HEALTHY	46589022	46589022	47
DEN0026	HEALTHY	Chatelier_2013	10.1038/nature12506	HEALTHY	39518019	39518019	39
DEN0028	HEALTHY	Chatelier_2013	10.1038/nature12506	HEALTHY	44920119	44920119	35
DEN0029	HEALTHY	Chatelier_2013	10.1038/nature12506	HEALTHY	32108566	32108566	9
DEN0031	HEALTHY	Chatelier_2013	10.1038/nature12506	HEALTHY	33282106	33282106	38
DEN0033	HEALTHY	Chatelier_2013	10.1038/nature12506	HEALTHY	37793040	37793040	32
DEN0035	HEALTHY	Chatelier_2013	10.1038/nature12506	HEALTHY	46470273	46470273	46
DEN0039	HEALTHY	Chatelier_2013	10.1038/nature12506	HEALTHY	29434545	29434545	19
DEN0041	HEALTHY	Chatelier_2013	10.1038/nature12506	HEALTHY	52389167	52389167	43
DEN0045	HEALTHY	Chatelier_2013	10.1038/nature12506	HEALTHY	48206629	48206629	51
DEN0046	HEALTHY	Chatelier_2013	10.1038/nature12506	HEALTHY	34911534	34911534	24
DEN0051	HEALTHY	Chatelier_2013	10.1038/nature12506	HEALTHY	49644642	49644642	60
DEN0052	HEALTHY	Chatelier_2013	10.1038/nature12506	HEALTHY	44553542	44553542	65
DEN0053	HEALTHY	Chatelier_2013	10.1038/nature12506	HEALTHY	31756916	31756916	18
DEN0061	HEALTHY	Chatelier_2013	10.1038/nature12506	HEALTHY	49032102	49032102	51
DEN0062	HEALTHY	Chatelier_2013	10.1038/nature12506	HEALTHY	27166048	27166048	28
DEN0063	HEALTHY	Chatelier_2013	10.1038/nature12506	HEALTHY	51424093	51424093	68
DEN0064	HEALTHY	Chatelier_2013	10.1038/nature12506	HEALTHY	40005864	40005864	60
DEN0065	HEALTHY	Chatelier_2013	10.1038/nature12506	HEALTHY	42976394	42976394	41
DEN0066	HEALTHY	Chatelier_2013	10.1038/nature12506	HEALTHY	42454494	42454494	48
DEN0067	HEALTHY	Chatelier_2013	10.1038/nature12506	HEALTHY	40226900	40226900	31
DEN0069	HEALTHY	Chatelier_2013	10.1038/nature12506	HEALTHY	50160914	50160914	36
DEN0070	HEALTHY	Chatelier_2013	10.1038/nature12506	HEALTHY	50780124	50780124	46
DEN0071	HEALTHY	Chatelier_2013	10.1038/nature12506	HEALTHY	47214790	47214790	53
DEN0072	HEALTHY	Chatelier_2013	10.1038/nature12506	HEALTHY	44361848	44361848	23
DEN0073	HEALTHY	Chatelier_2013	10.1038/nature12506	HEALTHY	47565005	47565005	63
DEN0078	HEALTHY	Chatelier_2013	10.1038/nature12506	HEALTHY	46538391	46538391	49
DEN0079	HEALTHY	Chatelier_2013	10.1038/nature12506	HEALTHY	54622453	54622453	75
DEN0082	HEALTHY	Chatelier_2013	10.1038/nature12506	HEALTHY	45073600	45073600	66
DEN0083	HEALTHY	Chatelier_2013	10.1038/nature12506	HEALTHY	50157534	50157534	36
DEN0085	HEALTHY	Chatelier_2013	10.1038/nature12506	HEALTHY	57841994	57841994	37
DEN0087	HEALTHY	Chatelier_2013	10.1038/nature12506	HEALTHY	33178805	33178805	11
DEN0090	HEALTHY	Chatelier_2013	10.1038/nature12506	HEALTHY	38054007	38054007	37
DEN0092	HEALTHY	Chatelier_2013	10.1038/nature12506	HEALTHY	32665569	32665569	19
DEN0093	HEALTHY	Chatelier_2013	10.1038/nature12506	HEALTHY	58867554	58867554	41
DEN0094	HEALTHY	Chatelier_2013	10.1038/nature12506	HEALTHY	38335125	38335125	48
DEN0096	HEALTHY	Chatelier_2013	10.1038/nature12506	HEALTHY	48927310	48927310	54
DEN0099	HEALTHY	Chatelier_2013	10.1038/nature12506	HEALTHY	31546860	31546860	11
DEN0100	HEALTHY	Chatelier_2013	10.1038/nature12506	HEALTHY	44057142	44057142	41
DEN0101	HEALTHY	Chatelier_2013	10.1038/nature12506	HEALTHY	49930665	49930665	46
DEN0107	HEALTHY	Chatelier_2013	10.1038/nature12506	HEALTHY	25624793	25624793	20
DEN0108	HEALTHY	Chatelier_2013	10.1038/nature12506	HEALTHY	28796483	28796483	14
DEN0109	HEALTHY	Chatelier_2013	10.1038/nature12506	HEALTHY	25258224	25258224	17
DEN0111	HEALTHY	Chatelier_2013	10.1038/nature12506	HEALTHY	35915650	35915650	16
DEN0114	HEALTHY	Chatelier_2013	10.1038/nature12506	HEALTHY	33998901	33998901	37
DEN0118	HEALTHY	Chatelier_2013	10.1038/nature12506	HEALTHY	45847758	45847758	40
DEN0120	HEALTHY	Chatelier_2013	10.1038/nature12506	HEALTHY	33443638	33443638	14
DEN0121	HEALTHY	Chatelier_2013	10.1038/nature12506	HEALTHY	33506297	33506297	24
DEN0122	HEALTHY	Chatelier_2013	10.1038/nature12506	HEALTHY	53159662	53159662	34
DEN0127	HEALTHY	Chatelier_2013	10.1038/nature12506	HEALTHY	29829073	29829073	13
DEN0131	HEALTHY	Chatelier_2013	10.1038/nature12506	HEALTHY	47656902	47656902	45
DEN0132	HEALTHY	Chatelier_2013	10.1038/nature12506	HEALTHY	53669437	53669437	48
DEN0133	HEALTHY	Chatelier_2013	10.1038/nature12506	HEALTHY	46710328	46710328	60
DEN0134	HEALTHY	Chatelier_2013	10.1038/nature12506	HEALTHY	32412558	32412558	53
DEN0136	HEALTHY	Chatelier_2013	10.1038/nature12506	HEALTHY	44291562	44291562	40
DEN0138	HEALTHY	Chatelier_2013	10.1038/nature12506	HEALTHY	29704572	29704572	11
DEN0139	HEALTHY	Chatelier_2013	10.1038/nature12506	HEALTHY	35379933	35379933	27
DEN0143	HEALTHY	Chatelier_2013	10.1038/nature12506	HEALTHY	53912811	53912811	30
DEN0144	HEALTHY	Chatelier_2013	10.1038/nature12506	HEALTHY	46728789	46728789	55
DEN0145	HEALTHY	Chatelier_2013	10.1038/nature12506	HEALTHY	41197728	41197728	25
DEN0146	HEALTHY	Chatelier_2013	10.1038/nature12506	HEALTHY	47666326	47666326	46
DEN0149	HEALTHY	Chatelier_2013	10.1038/nature12506	HEALTHY	44427195	44427195	39
DEN0151	HEALTHY	Chatelier_2013	10.1038/nature12506	HEALTHY	35169143	35169143	34
DEN0152	HEALTHY	Chatelier_2013	10.1038/nature12506	HEALTHY	30212546	30212546	8
DEN0153	HEALTHY	Chatelier_2013	10.1038/nature12506	HEALTHY	39741160	39741160	57
DEN0154	HEALTHY	Chatelier_2013	10.1038/nature12506	HEALTHY	31231455	31231455	16
DEN0156	HEALTHY	Chatelier_2013	10.1038/nature12506	HEALTHY	38025060	38025060	43
DEN0158	HEALTHY	Chatelier_2013	10.1038/nature12506	HEALTHY	40619953	40619953	42
DEN0159	HEALTHY	Chatelier_2013	10.1038/nature12506	HEALTHY	30580215	30580215	37
DEN0160	HEALTHY	Chatelier_2013	10.1038/nature12506	HEALTHY	35213514	35213514	22
DEN0161	HEALTHY	Chatelier_2013	10.1038/nature12506	HEALTHY	49049383	49049383	29
DEN0162	HEALTHY	Chatelier_2013	10.1038/nature12506	HEALTHY	36904022	36904022	23
DEN0164	HEALTHY	Chatelier_2013	10.1038/nature12506	HEALTHY	33090647	33090647	17
DEN0165	HEALTHY	Chatelier_2013	10.1038/nature12506	HEALTHY	40424075	40424075	52
DEN0168	HEALTHY	Chatelier_2013	10.1038/nature12506	HEALTHY	58537173	58537173	58
DEN0169	HEALTHY	Chatelier_2013	10.1038/nature12506	HEALTHY	30950602	30950602	32
DEN0173	HEALTHY	Chatelier_2013	10.1038/nature12506	HEALTHY	36776581	36776581	25
DEN0174	HEALTHY	Chatelier_2013	10.1038/nature12506	HEALTHY	46739045	46739045	45
DEN0175	HEALTHY	Chatelier_2013	10.1038/nature12506	HEALTHY	31957940	31957940	16
DEN0178	HEALTHY	Chatelier_2013	10.1038/nature12506	HEALTHY	28197773	28197773	10
DEN0179	HEALTHY	Chatelier_2013	10.1038/nature12506	HEALTHY	29733201	29733201	10
DEN0180	HEALTHY	Chatelier_2013	10.1038/nature12506	HEALTHY	32430161	32430161	41
DEN0181	HEALTHY	Chatelier_2013	10.1038/nature12506	HEALTHY	49356390	49356390	24
DEN0184	HEALTHY	Chatelier_2013	10.1038/nature12506	HEALTHY	29799342	29799342	24
DEN0185	HEALTHY	Chatelier_2013	10.1038/nature12506	HEALTHY	49442487	49442487	59
DEN0188	HEALTHY	Chatelier_2013	10.1038/nature12506	HEALTHY	48397323	48397323	39
DEN0192	HEALTHY	Chatelier_2013	10.1038/nature12506	HEALTHY	30578998	30578998	18
DEN0194	HEALTHY	Chatelier_2013	10.1038/nature12506	HEALTHY	38582052	38582052	39
DEN0195	HEALTHY	Chatelier_2013	10.1038/nature12506	HEALTHY	40070372	40070372	32
DEN0199	HEALTHY	Chatelier_2013	10.1038/nature12506	HEALTHY	58533367	58533367	37
DEN0200	HEALTHY	Chatelier_2013	10.1038/nature12506	HEALTHY	46094465	46094465	29
DEN0202	HEALTHY	Chatelier_2013	10.1038/nature12506	HEALTHY	27501502	27501502	15
DEN0203	HEALTHY	Chatelier_2013	10.1038/nature12506	HEALTHY	43368945	43368945	39
DEN0205	HEALTHY	Chatelier_2013	10.1038/nature12506	HEALTHY	36025662	36025662	35
DEN0212	HEALTHY	Chatelier_2013	10.1038/nature12506	HEALTHY	42970651	42970651	55
DEN0213	HEALTHY	Chatelier_2013	10.1038/nature12506	HEALTHY	43801963	43801963	38
DEN0214	HEALTHY	Chatelier_2013	10.1038/nature12506	HEALTHY	37936593	37936593	42
DEN0215	HEALTHY	Chatelier_2013	10.1038/nature12506	HEALTHY	34273643	34273643	27
DEN0216	HEALTHY	Chatelier_2013	10.1038/nature12506	HEALTHY	35782200	35782200	35
DEN0219	HEALTHY	Chatelier_2013	10.1038/nature12506	HEALTHY	46387812	46387812	51
DEN0221	HEALTHY	Chatelier_2013	10.1038/nature12506	HEALTHY	37683974	37683974	45
DEN0225	HEALTHY	Chatelier_2013	10.1038/nature12506	HEALTHY	29418312	29418312	21
DEN0226	HEALTHY	Chatelier_2013	10.1038/nature12506	HEALTHY	42334046	42334046	52
DEN0228	HEALTHY	Chatelier_2013	10.1038/nature12506	HEALTHY	51852692	51852692	32
DEN0229	HEALTHY	Chatelier_2013	10.1038/nature12506	HEALTHY	46210848	46210848	21
DEN0230	HEALTHY	Chatelier_2013	10.1038/nature12506	HEALTHY	44486812	44486812	33
DEN0231	HEALTHY	Chatelier_2013	10.1038/nature12506	HEALTHY	44271885	44271885	38
DEN0233	HEALTHY	Chatelier_2013	10.1038/nature12506	HEALTHY	30449273	30449273	14
DEN0236	HEALTHY	Chatelier_2013	10.1038/nature12506	HEALTHY	37194352	37194352	15
DEN0237	HEALTHY	Chatelier_2013	10.1038/nature12506	HEALTHY	45067560	45067560	27
DEN0238	HEALTHY	Chatelier_2013	10.1038/nature12506	HEALTHY	44534551	44534551	49
DEN0239	HEALTHY	Chatelier_2013	10.1038/nature12506	HEALTHY	45146448	45146448	50
DEN0240	HEALTHY	Chatelier_2013	10.1038/nature12506	HEALTHY	47217787	47217787	43
DEN0241	HEALTHY	Chatelier_2013	10.1038/nature12506	HEALTHY	29697354	29697354	11
DEN0244	HEALTHY	Chatelier_2013	10.1038/nature12506	HEALTHY	43812936	43812936	45
DEN0245	HEALTHY	Chatelier_2013	10.1038/nature12506	HEALTHY	48408539	48408539	42
DEN0246	HEALTHY	Chatelier_2013	10.1038/nature12506	HEALTHY	49900968	49900968	55
DEN0250	HEALTHY	Chatelier_2013	10.1038/nature12506	HEALTHY	29844475	29844475	8
DEN0251	HEALTHY	Chatelier_2013	10.1038/nature12506	HEALTHY	29823448	29823448	16
DEN0252	HEALTHY	Chatelier_2013	10.1038/nature12506	HEALTHY	52266862	52266862	39
DEN0253	HEALTHY	Chatelier_2013	10.1038/nature12506	HEALTHY	32813386	32813386	19
DEN0254	HEALTHY	Chatelier_2013	10.1038/nature12506	HEALTHY	49448776	49448776	64
DEN0257	HEALTHY	Chatelier_2013	10.1038/nature12506	HEALTHY	26970140	26970140	34
DEN0259	HEALTHY	Chatelier_2013	10.1038/nature12506	HEALTHY	33641796	33641796	39
DEN0260	HEALTHY	Chatelier_2013	10.1038/nature12506	HEALTHY	43534468	43534468	49
DEN0261	HEALTHY	Chatelier_2013	10.1038/nature12506	HEALTHY	38736150	38736150	23
DEN0263	HEALTHY	Chatelier_2013	10.1038/nature12506	HEALTHY	44074275	44074275	50
DEN0264	HEALTHY	Chatelier_2013	10.1038/nature12506	HEALTHY	46373966	46373966	51
DEN0266	HEALTHY	Chatelier_2013	10.1038/nature12506	HEALTHY	51913644	51913644	47
DEN0268	HEALTHY	Chatelier_2013	10.1038/nature12506	HEALTHY	44625196	44625196	27
DEN0270	HEALTHY	Chatelier_2013	10.1038/nature12506	HEALTHY	37186014	37186014	13
DEN0272	HEALTHY	Chatelier_2013	10.1038/nature12506	HEALTHY	51157803	51157803	41
DEN0274	HEALTHY	Chatelier_2013	10.1038/nature12506	HEALTHY	29214862	29214862	12
DEN0276	HEALTHY	Chatelier_2013	10.1038/nature12506	HEALTHY	48733462	48733462	43
DEN0278	HEALTHY	Chatelier_2013	10.1038/nature12506	HEALTHY	45647261	45647261	48
DEN0281	HEALTHY	Chatelier_2013	10.1038/nature12506	HEALTHY	45982409	45982409	58
DEN0283	HEALTHY	Chatelier_2013	10.1038/nature12506	HEALTHY	43192858	43192858	37
DEN0287	HEALTHY	Chatelier_2013	10.1038/nature12506	HEALTHY	31681595	31681595	26
DEN0288	HEALTHY	Chatelier_2013	10.1038/nature12506	HEALTHY	35509452	35509452	53
DEN0289	HEALTHY	Chatelier_2013	10.1038/nature12506	HEALTHY	53426062	53426062	36
DEN0290	HEALTHY	Chatelier_2013	10.1038/nature12506	HEALTHY	47809980	47809980	50
ENG0006	HEALTHY	Xie_2016	10.1016/j.cels.2016.10.004	HEALTHY	27145259	27145259	35
ENG0103	HEALTHY	Xie_2016	10.1016/j.cels.2016.10.004	HEALTHY	26013474	26013474	30
n_209_V6_M_229_non_pouchitis_2	UC	Vineis_2016	10.1128/mBio.01713-16	IBD	28294520	NA	18
n_209_V7_M_348_non_pouchitis_3	UC	Vineis_2016	10.1128/mBio.01713-16	IBD	45782126	NA	15
n_210_V10_M_720_non_pouchitis_7	UC	Vineis_2016	10.1128/mBio.01713-16	IBD	38494479	NA	35
n_210_V5_M_117_non_pouchitis_4	UC	Vineis_2016	10.1128/mBio.01713-16	IBD	42616294	NA	31
n_210_V6_M_265_non_pouchitis_5	UC	Vineis_2016	10.1128/mBio.01713-16	IBD	42258558	NA	34
n_210_V7_M_368_non_pouchitis_6	UC	Vineis_2016	10.1128/mBio.01713-16	IBD	53943442	NA	54
n_211_V10_M_714_non_pouchitis_4	UC	Vineis_2016	10.1128/mBio.01713-16	IBD	45452617	NA	19
n_211_V5_M_117_non_pouchitis_1	UC	Vineis_2016	10.1128/mBio.01713-16	IBD	46217365	NA	36
n_211_V6_M_229_non_pouchitis_2	UC	Vineis_2016	10.1128/mBio.01713-16	IBD	50000512	NA	20
n_211_V7_M_369_non_pouchitis_3	UC	Vineis_2016	10.1128/mBio.01713-16	IBD	29846973	NA	21
n_212_V10_M_720_non_pouchitis_4	UC	Vineis_2016	10.1128/mBio.01713-16	IBD	60173347	NA	30
n_212_V5_M_120_non_pouchitis_1	UC	Vineis_2016	10.1128/mBio.01713-16	IBD	36590407	NA	19
n_212_V6_M_239_non_pouchitis_2	UC	Vineis_2016	10.1128/mBio.01713-16	IBD	41557976	NA	21
n_212_V7_M_359_non_pouchitis_3	UC	Vineis_2016	10.1128/mBio.01713-16	IBD	51249909	NA	25
n_213_V10_M_722_non_pouchitis_4	UC	Vineis_2016	10.1128/mBio.01713-16	IBD	32904270	NA	24
n_213_V5_M_126_non_pouchitis_1	UC	Vineis_2016	10.1128/mBio.01713-16	IBD	52494732	NA	25
n_213_V6_M_231_non_pouchitis_2	UC	Vineis_2016	10.1128/mBio.01713-16	IBD	48246072	NA	35
n_213_V7_M_359_non_pouchitis_3	UC	Vineis_2016	10.1128/mBio.01713-16	IBD	43498008	NA	20
n_216_V10_M_721_non_pouchitis_4	UC	Vineis_2016	10.1128/mBio.01713-16	IBD	31864666	NA	19
n_216_V6_M_233_non_pouchitis_2	UC	Vineis_2016	10.1128/mBio.01713-16	IBD	32811313	NA	24
n_217_V10_M_720_non_pouchitis_4	UC	Vineis_2016	10.1128/mBio.01713-16	IBD	26453103	NA	14
n_217_V6_M_235_non_pouchitis_2	UC	Vineis_2016	10.1128/mBio.01713-16	IBD	35551559	NA	13
n_423_V6_M_232_non_pouchitis_2	UC	Vineis_2016	10.1128/mBio.01713-16	IBD	45023947	NA	16
n_423_V7_M_355_non_pouchitis_3	UC	Vineis_2016	10.1128/mBio.01713-16	IBD	79271127	NA	23
n_427_V6_M_234_non_pouchitis_2	UC	Vineis_2016	10.1128/mBio.01713-16	IBD	29207555	NA	12
n_503_V5_M_126_non_pouchitis_1	UC	Vineis_2016	10.1128/mBio.01713-16	IBD	30283759	NA	22
n_503_V6_M_271_non_pouchitis_2	UC	Vineis_2016	10.1128/mBio.01713-16	IBD	47308159	NA	27
n_503_V7_M_412_non_pouchitis_3	UC	Vineis_2016	10.1128/mBio.01713-16	IBD	44220586	NA	20
p_200_V10_M_731_without_inflamation_5	UC	Vineis_2016	10.1128/mBio.01713-16	IBD	58746620	NA	18
p_200_V12_M_282_inflamation_1	UC	Vineis_2016	10.1128/mBio.01713-16	IBD	55388004	NA	24
p_202_V10_M_743_without_inflamation_6	UC	Vineis_2016	10.1128/mBio.01713-16	IBD	41542372	NA	15
p_202_V11_M_301_inflamation_3	UC	Vineis_2016	10.1128/mBio.01713-16	IBD	33366008	NA	12
p_202_V12_M_329_antibiotic_4	UC	Vineis_2016	10.1128/mBio.01713-16	IBD	39402038	NA	20
p_202_V6_M_238_without_inflamation_2	UC	Vineis_2016	10.1128/mBio.01713-16	IBD	35253671	NA	21
p_204_V10_M_785_without_inflamation_6	UC	Vineis_2016	10.1128/mBio.01713-16	IBD	35739003	NA	13
p_204_V12_M_462_antibiotic_4	UC	Vineis_2016	10.1128/mBio.01713-16	IBD	30296996	NA	14
p_204_V5_M_187_without_inflamation_1	UC	Vineis_2016	10.1128/mBio.01713-16	IBD	32752585	NA	29
p_204_V6_M_308_without_inflamation_2	UC	Vineis_2016	10.1128/mBio.01713-16	IBD	30610597	NA	12
p_206_V11_M_482_inflamation_5	UC	Vineis_2016	10.1128/mBio.01713-16	IBD	32034840	NA	21
p_206_V5_M_118_without_inflamation_1	UC	Vineis_2016	10.1128/mBio.01713-16	IBD	41355771	NA	19
p_206_V6_M_237_without_inflamation_2	UC	Vineis_2016	10.1128/mBio.01713-16	IBD	27465131	NA	17
p_206_V7_M_363_without_inflamation_3	UC	Vineis_2016	10.1128/mBio.01713-16	IBD	26712267	NA	8
p_207_V10_M_719_inflamation_7	UC	Vineis_2016	10.1128/mBio.01713-16	IBD	31557512	NA	8
p_207_V5_M_124_without_inflamation_1	UC	Vineis_2016	10.1128/mBio.01713-16	IBD	62587761	NA	15
p_207_V6_M_236_without_inflamation_2	UC	Vineis_2016	10.1128/mBio.01713-16	IBD	51548634	NA	15
p_207_V7_M_355_without_inflamation_3	UC	Vineis_2016	10.1128/mBio.01713-16	IBD	36926363	NA	21
p_207_V8_M_482_inflamation_4	UC	Vineis_2016	10.1128/mBio.01713-16	IBD	37751327	NA	12
p_207_V9_M_601_without_inflamation_6	UC	Vineis_2016	10.1128/mBio.01713-16	IBD	35794075	NA	16
p_208_V12_M_651_antibiotic_6	UC	Vineis_2016	10.1128/mBio.01713-16	IBD	29888092	NA	29
p_208_V5_M_119_without_inflamation_1	UC	Vineis_2016	10.1128/mBio.01713-16	IBD	36402869	NA	35
p_208_V7_M_357_without_inflamation_3	UC	Vineis_2016	10.1128/mBio.01713-16	IBD	43832913	NA	14
p_208_V9_M_613_inflamation_5	UC	Vineis_2016	10.1128/mBio.01713-16	IBD	28179785	NA	8
p_214_V6_M_231_without_inflamation_2	UC	Vineis_2016	10.1128/mBio.01713-16	IBD	51341647	NA	20
p_214_V7_M_358_without_inflamation_3	UC	Vineis_2016	10.1128/mBio.01713-16	IBD	49490381	NA	15
p_214_V8_M_484_inflamation_4	UC	Vineis_2016	10.1128/mBio.01713-16	IBD	45052288	NA	10
p_215_V10_M_717_without_inflamation_3	UC	Vineis_2016	10.1128/mBio.01713-16	IBD	95863264	NA	31
p_215_V6_M_248_without_inflamation_1	UC	Vineis_2016	10.1128/mBio.01713-16	IBD	39910907	NA	22
p_215_V7_M_371_without_inflamation_2	UC	Vineis_2016	10.1128/mBio.01713-16	IBD	46011981	NA	21
p_218_V6_M_238_without_inflamation_2	UC	Vineis_2016	10.1128/mBio.01713-16	IBD	38543142	NA	25
p_500_V5_M_120_without_inflamation_1	UC	Vineis_2016	10.1128/mBio.01713-16	IBD	34088108	NA	21
p_500_V6_M_260_without_inflamation_2	UC	Vineis_2016	10.1128/mBio.01713-16	IBD	43332590	NA	24
p_500_V7_M_365_without_inflamation_3	UC	Vineis_2016	10.1128/mBio.01713-16	IBD	33632520	NA	31
p_502_V5_M_120_without_inflamation_1	UC	Vineis_2016	10.1128/mBio.01713-16	IBD	60381866	NA	23
p_502_V6_M_234_without_inflamation_2	UC	Vineis_2016	10.1128/mBio.01713-16	IBD	38486593	NA	24
M2075C4_MGX	NONIBD	Schirmir_2018	10.1038/s41564-017-0089-z	NONIBD	26105825	26105825	13
M2077C1_MGX	NONIBD	Schirmir_2018	10.1038/s41564-017-0089-z	NONIBD	29795077	29795077	9
G48783_Control	NONIBD	Franzosa_2018	10.1038/s41564-018-0306-4	NONIBD	47661584	47661584	53
G48787_Control	NONIBD	Franzosa_2018	10.1038/s41564-018-0306-4	NONIBD	51946924	51946924	43
G48789_Control	NONIBD	Franzosa_2018	10.1038/s41564-018-0306-4	NONIBD	58077497	58077497	97
G48790_Control	NONIBD	Franzosa_2018	10.1038/s41564-018-0306-4	NONIBD	49491124	49491124	90
G48792_Control	NONIBD	Franzosa_2018	10.1038/s41564-018-0306-4	NONIBD	56728455	56728455	71
G48793_Control	NONIBD	Franzosa_2018	10.1038/s41564-018-0306-4	NONIBD	50345518	50345518	45
G48798_Control	NONIBD	Franzosa_2018	10.1038/s41564-018-0306-4	NONIBD	55623086	55623086	57
G48808_Control	NONIBD	Franzosa_2018	10.1038/s41564-018-0306-4	NONIBD	43025795	43025795	33
G48826_Control	NONIBD	Franzosa_2018	10.1038/s41564-018-0306-4	NONIBD	54919152	54919152	68
G48831_Control	NONIBD	Franzosa_2018	10.1038/s41564-018-0306-4	NONIBD	44045490	44045490	42
G83831_Control	NONIBD	Franzosa_2018	10.1038/s41564-018-0306-4	NONIBD	27089695	27089695	33
AST0008	CRC_ADENOMA	Feng_2015	10.1038/ncomms7528	NONIBD	32109723	32109723	23
AST0009	CRC_CARCINOMA	Feng_2015	10.1038/ncomms7528	NONIBD	26382550	26382550	14
AST0011	CRC_CARCINOMA	Feng_2015	10.1038/ncomms7528	NONIBD	25837477	25837477	44
AST0013	CRC_CARCINOMA	Feng_2015	10.1038/ncomms7528	NONIBD	25516040	25516040	47
AST0015	CRC_ADENOMA	Feng_2015	10.1038/ncomms7528	NONIBD	30352133	30352133	31
AST0017	CRC_CARCINOMA	Feng_2015	10.1038/ncomms7528	NONIBD	26617685	26617685	30
AST0018	CRC_ADENOMA	Feng_2015	10.1038/ncomms7528	NONIBD	27200088	27200088	30
AST0022	CRC_ADENOMA	Feng_2015	10.1038/ncomms7528	NONIBD	28420748	28420748	38
AST0023	CRC_CARCINOMA	Feng_2015	10.1038/ncomms7528	NONIBD	29927254	29927254	50
AST0030	CRC_CARCINOMA	Feng_2015	10.1038/ncomms7528	NONIBD	31308192	31308192	14
AST0032	CRC_ADENOMA	Feng_2015	10.1038/ncomms7528	NONIBD	29934929	29934929	32
AST0034	CRC_ADENOMA	Feng_2015	10.1038/ncomms7528	NONIBD	33467260	33467260	31
AST0037	CRC_CARCINOMA	Feng_2015	10.1038/ncomms7528	NONIBD	31580158	31580158	31
AST0038	CRC_ADENOMA	Feng_2015	10.1038/ncomms7528	NONIBD	33080606	33080606	29
AST0042	CRC_ADENOMA	Feng_2015	10.1038/ncomms7528	NONIBD	29200249	29200249	41
AST0044	CRC_CARCINOMA	Feng_2015	10.1038/ncomms7528	NONIBD	29363386	29363386	21
AST0045	CRC_ADENOMA	Feng_2015	10.1038/ncomms7528	NONIBD	39170675	39170675	22
AST0049	CRC_CARCINOMA	Feng_2015	10.1038/ncomms7528	NONIBD	27886772	27886772	35
AST0051	CRC_ADENOMA	Feng_2015	10.1038/ncomms7528	NONIBD	25258683	25258683	37
AST0056	CRC_ADENOMA	Feng_2015	10.1038/ncomms7528	NONIBD	29190565	29190565	20
AST0064	CRC_CARCINOMA	Feng_2015	10.1038/ncomms7528	NONIBD	31222562	31222562	42
AST0066	CRC_CARCINOMA	Feng_2015	10.1038/ncomms7528	NONIBD	29360386	29360386	18
AST0067	CRC_CARCINOMA	Feng_2015	10.1038/ncomms7528	NONIBD	32431127	32431127	29
AST0068	CRC_CARCINOMA	Feng_2015	10.1038/ncomms7528	NONIBD	27671795	27671795	29
AST0069	CRC_CARCINOMA	Feng_2015	10.1038/ncomms7528	NONIBD	27911137	27911137	44
AST0070	CRC_CARCINOMA	Feng_2015	10.1038/ncomms7528	NONIBD	30227502	30227502	44
AST0071	CRC_CARCINOMA	Feng_2015	10.1038/ncomms7528	NONIBD	29991991	29991991	51
AST0072	CRC_CARCINOMA	Feng_2015	10.1038/ncomms7528	NONIBD	28686450	28686450	38
AST0073	CRC_CARCINOMA	Feng_2015	10.1038/ncomms7528	NONIBD	27061552	27061552	31
AST0074	CRC_CARCINOMA	Feng_2015	10.1038/ncomms7528	NONIBD	25170549	25170549	34
AST0075	CRC_CARCINOMA	Feng_2015	10.1038/ncomms7528	NONIBD	27416746	27416746	28
AST0076	CRC_CARCINOMA	Feng_2015	10.1038/ncomms7528	NONIBD	30717938	30717938	41
AST0077	CRC_CARCINOMA	Feng_2015	10.1038/ncomms7528	NONIBD	33201178	33201178	44
AST0078	CRC_CARCINOMA	Feng_2015	10.1038/ncomms7528	NONIBD	36202656	36202656	31
AST0081	CRC_ADENOMA	Feng_2015	10.1038/ncomms7528	NONIBD	25396770	25396770	40
AST0083	CRC_ADENOMA	Feng_2015	10.1038/ncomms7528	NONIBD	30396280	30396280	50
AST0086	CRC_ADENOMA	Feng_2015	10.1038/ncomms7528	NONIBD	31432413	31432413	49
AST0091	CRC_ADENOMA	Feng_2015	10.1038/ncomms7528	NONIBD	29834475	29834475	43
AST0095	CRC_ADENOMA	Feng_2015	10.1038/ncomms7528	NONIBD	27311801	27311801	32
AST0098	CRC_ADENOMA	Feng_2015	10.1038/ncomms7528	NONIBD	26145505	26145505	44
AST0105	CRC_ADENOMA	Feng_2015	10.1038/ncomms7528	NONIBD	27641168	27641168	46
AST0107	CRC_ADENOMA	Feng_2015	10.1038/ncomms7528	NONIBD	30930120	30930120	42
AST0109	CRC_ADENOMA	Feng_2015	10.1038/ncomms7528	NONIBD	27309966	27309966	21
AST0112	CRC_CARCINOMA	Feng_2015	10.1038/ncomms7528	NONIBD	25369054	25369054	39
AST0114	CRC_ADENOMA	Feng_2015	10.1038/ncomms7528	NONIBD	29108157	29108157	27
AST0115	CRC_ADENOMA	Feng_2015	10.1038/ncomms7528	NONIBD	29416034	29416034	31
AST0117	CRC_ADENOMA	Feng_2015	10.1038/ncomms7528	NONIBD	26376787	26376787	39
AST0119	CRC_ADENOMA	Feng_2015	10.1038/ncomms7528	NONIBD	28622644	28622644	37
AST0120	CRC_ADENOMA	Feng_2015	10.1038/ncomms7528	NONIBD	28239602	28239602	56
AST0121	CRC_ADENOMA	Feng_2015	10.1038/ncomms7528	NONIBD	25003391	25003391	42
AST0122	CRC_ADENOMA	Feng_2015	10.1038/ncomms7528	NONIBD	31289052	31289052	44
AST0124	CRC_ADENOMA	Feng_2015	10.1038/ncomms7528	NONIBD	25433150	25433150	45
AST0126	CRC_ADENOMA	Feng_2015	10.1038/ncomms7528	NONIBD	30084053	30084053	41
AST0127	CRC_ADENOMA	Feng_2015	10.1038/ncomms7528	NONIBD	32710495	32710495	48
AST0128	CRC_CARCINOMA	Feng_2015	10.1038/ncomms7528	NONIBD	29017379	29017379	55
AST0130	CRC_CARCINOMA	Feng_2015	10.1038/ncomms7528	NONIBD	28120088	28120088	33
AST0131	CRC_CARCINOMA	Feng_2015	10.1038/ncomms7528	NONIBD	30100955	30100955	27
AST0132	CRC_CARCINOMA	Feng_2015	10.1038/ncomms7528	NONIBD	36858391	36858391	5
AST0133	CRC_CARCINOMA	Feng_2015	10.1038/ncomms7528	NONIBD	25919573	25919573	40
AST0134	CRC_CARCINOMA	Feng_2015	10.1038/ncomms7528	NONIBD	28651553	28651553	33
AST0135	CRC_CARCINOMA	Feng_2015	10.1038/ncomms7528	NONIBD	28467172	28467172	30
AST0136	CRC_CARCINOMA	Feng_2015	10.1038/ncomms7528	NONIBD	31804185	31804185	35
AST0139	CRC_ADENOMA	Feng_2015	10.1038/ncomms7528	NONIBD	31902304	31902304	15
AST0141	CRC_CARCINOMA	Feng_2015	10.1038/ncomms7528	NONIBD	26712989	26712989	38
AST0145	CRC_CARCINOMA	Feng_2015	10.1038/ncomms7528	NONIBD	33015193	33015193	31

## Sheet: c) All Samples
Sample	Diagnosis	Study	Study DOI	Group	R1 num reads	R2 num reads	Num populations	SRA/ENA accession
CHR_G01_CD_1	CD	Quince_2015	10.1038/ajg.2015.357	IBD	2721328	2721328	12	PRJEB7576 (no deposited sequences, we accessed this data directly from the study authors)
CHR_G01_CD_2	CD	Quince_2015	10.1038/ajg.2015.357	IBD	7104084	7104084	15	PRJEB7576 (no deposited sequences, we accessed this data directly from the study authors)
CHR_G01_CD_3	CD	Quince_2015	10.1038/ajg.2015.357	IBD	5178143	5178143	11	PRJEB7576 (no deposited sequences, we accessed this data directly from the study authors)
CHR_G01_CD_4	CD	Quince_2015	10.1038/ajg.2015.357	IBD	7430101	7430101	23	PRJEB7576 (no deposited sequences, we accessed this data directly from the study authors)
CHR_G01_CD_5	CD	Quince_2015	10.1038/ajg.2015.357	IBD	3939436	3939436	16	PRJEB7576 (no deposited sequences, we accessed this data directly from the study authors)
CHR_G03_CD_1	CD	Quince_2015	10.1038/ajg.2015.357	IBD	6333327	6333327	21	PRJEB7576 (no deposited sequences, we accessed this data directly from the study authors)
CHR_G03_CD_2	CD	Quince_2015	10.1038/ajg.2015.357	IBD	9838764	9838764	23	PRJEB7576 (no deposited sequences, we accessed this data directly from the study authors)
CHR_G03_CD_3	CD	Quince_2015	10.1038/ajg.2015.357	IBD	1872818	1872818	7	PRJEB7576 (no deposited sequences, we accessed this data directly from the study authors)
CHR_G03_CD_4	CD	Quince_2015	10.1038/ajg.2015.357	IBD	4632513	4632513	11	PRJEB7576 (no deposited sequences, we accessed this data directly from the study authors)
CHR_G03_CD_5	CD	Quince_2015	10.1038/ajg.2015.357	IBD	2949563	2949563	13	PRJEB7576 (no deposited sequences, we accessed this data directly from the study authors)
CHR_G05_CD_1	CD	Quince_2015	10.1038/ajg.2015.357	IBD	3936304	3936304	11	PRJEB7576 (no deposited sequences, we accessed this data directly from the study authors)
CHR_G05_CD_2	CD	Quince_2015	10.1038/ajg.2015.357	IBD	4636589	4636589	12	PRJEB7576 (no deposited sequences, we accessed this data directly from the study authors)
CHR_G05_CD_3	CD	Quince_2015	10.1038/ajg.2015.357	IBD	2764868	2764868	8	PRJEB7576 (no deposited sequences, we accessed this data directly from the study authors)
CHR_G05_CD_4	CD	Quince_2015	10.1038/ajg.2015.357	IBD	5182752	5182752	5	PRJEB7576 (no deposited sequences, we accessed this data directly from the study authors)
CHR_G05_CD_5	CD	Quince_2015	10.1038/ajg.2015.357	IBD	3537110	3537110	9	PRJEB7576 (no deposited sequences, we accessed this data directly from the study authors)
CHR_G06_CD_1	CD	Quince_2015	10.1038/ajg.2015.357	IBD	2027237	2027237	8	PRJEB7576 (no deposited sequences, we accessed this data directly from the study authors)
CHR_G06_CD_2	CD	Quince_2015	10.1038/ajg.2015.357	IBD	3102960	3102960	12	PRJEB7576 (no deposited sequences, we accessed this data directly from the study authors)
CHR_G06_CD_3	CD	Quince_2015	10.1038/ajg.2015.357	IBD	3107697	3107697	11	PRJEB7576 (no deposited sequences, we accessed this data directly from the study authors)
CHR_G06_CD_4	CD	Quince_2015	10.1038/ajg.2015.357	IBD	6062400	6062400	18	PRJEB7576 (no deposited sequences, we accessed this data directly from the study authors)
CHR_G06_CD_5	CD	Quince_2015	10.1038/ajg.2015.357	IBD	3399879	3399879	13	PRJEB7576 (no deposited sequences, we accessed this data directly from the study authors)
CHR_G08_CD_1	CD	Quince_2015	10.1038/ajg.2015.357	IBD	2470002	2470002	11	PRJEB7576 (no deposited sequences, we accessed this data directly from the study authors)
CHR_G08_CD_2	CD	Quince_2015	10.1038/ajg.2015.357	IBD	2510989	2510989	11	PRJEB7576 (no deposited sequences, we accessed this data directly from the study authors)
CHR_G08_CD_3	CD	Quince_2015	10.1038/ajg.2015.357	IBD	3533798	3533798	9	PRJEB7576 (no deposited sequences, we accessed this data directly from the study authors)
CHR_G08_CD_4	CD	Quince_2015	10.1038/ajg.2015.357	IBD	2646515	2646515	9	PRJEB7576 (no deposited sequences, we accessed this data directly from the study authors)
CHR_G08_CD_5	CD	Quince_2015	10.1038/ajg.2015.357	IBD	1610595	1610595	9	PRJEB7576 (no deposited sequences, we accessed this data directly from the study authors)
CHR_G09_CD_1	CD	Quince_2015	10.1038/ajg.2015.357	IBD	1355886	1355886	5	PRJEB7576 (no deposited sequences, we accessed this data directly from the study authors)
CHR_G09_CD_2	CD	Quince_2015	10.1038/ajg.2015.357	IBD	4097053	4097053	14	PRJEB7576 (no deposited sequences, we accessed this data directly from the study authors)
CHR_G09_CD_3	CD	Quince_2015	10.1038/ajg.2015.357	IBD	2569791	2569791	10	PRJEB7576 (no deposited sequences, we accessed this data directly from the study authors)
CHR_G09_CD_4	CD	Quince_2015	10.1038/ajg.2015.357	IBD	4140117	4140117	17	PRJEB7576 (no deposited sequences, we accessed this data directly from the study authors)
CHR_G09_CD_5	CD	Quince_2015	10.1038/ajg.2015.357	IBD	4410822	4410822	15	PRJEB7576 (no deposited sequences, we accessed this data directly from the study authors)
CHR_G10_CD_1	CD	Quince_2015	10.1038/ajg.2015.357	IBD	5644318	5644318	15	PRJEB7576 (no deposited sequences, we accessed this data directly from the study authors)
CHR_G10_CD_2	CD	Quince_2015	10.1038/ajg.2015.357	IBD	2804039	2804039	11	PRJEB7576 (no deposited sequences, we accessed this data directly from the study authors)
CHR_G10_CD_3	CD	Quince_2015	10.1038/ajg.2015.357	IBD	7949964	7949964	15	PRJEB7576 (no deposited sequences, we accessed this data directly from the study authors)
CHR_G10_CD_4	CD	Quince_2015	10.1038/ajg.2015.357	IBD	2955616	2955616	7	PRJEB7576 (no deposited sequences, we accessed this data directly from the study authors)
CHR_G10_CD_5	CD	Quince_2015	10.1038/ajg.2015.357	IBD	6125480	6125480	22	PRJEB7576 (no deposited sequences, we accessed this data directly from the study authors)
CHR_G11_CD_1	CD	Quince_2015	10.1038/ajg.2015.357	IBD	3515098	3515098	11	PRJEB7576 (no deposited sequences, we accessed this data directly from the study authors)
CHR_G11_CD_2	CD	Quince_2015	10.1038/ajg.2015.357	IBD	1381541	1381541	5	PRJEB7576 (no deposited sequences, we accessed this data directly from the study authors)
CHR_G11_CD_3	CD	Quince_2015	10.1038/ajg.2015.357	IBD	4914121	4914121	14	PRJEB7576 (no deposited sequences, we accessed this data directly from the study authors)
CHR_G11_CD_4	CD	Quince_2015	10.1038/ajg.2015.357	IBD	1821350	1821350	6	PRJEB7576 (no deposited sequences, we accessed this data directly from the study authors)
CHR_G11_CD_5	CD	Quince_2015	10.1038/ajg.2015.357	IBD	5823703	5823703	23	PRJEB7576 (no deposited sequences, we accessed this data directly from the study authors)
CHR_G12_CD_1	CD	Quince_2015	10.1038/ajg.2015.357	IBD	1199615	1199615	3	PRJEB7576 (no deposited sequences, we accessed this data directly from the study authors)
CHR_G12_CD_2	CD	Quince_2015	10.1038/ajg.2015.357	IBD	189263	189263	1	PRJEB7576 (no deposited sequences, we accessed this data directly from the study authors)
CHR_G12_CD_3	CD	Quince_2015	10.1038/ajg.2015.357	IBD	139822	139822	0	PRJEB7576 (no deposited sequences, we accessed this data directly from the study authors)
CHR_G12_CD_5	CD	Quince_2015	10.1038/ajg.2015.357	IBD	8063179	8063179	18	PRJEB7576 (no deposited sequences, we accessed this data directly from the study authors)
CHR_G15_CD_1	CD	Quince_2015	10.1038/ajg.2015.357	IBD	6030959	6030959	30	PRJEB7576 (no deposited sequences, we accessed this data directly from the study authors)
CHR_G15_CD_3	CD	Quince_2015	10.1038/ajg.2015.357	IBD	1665904	1665904	8	PRJEB7576 (no deposited sequences, we accessed this data directly from the study authors)
CHR_G15_CD_4	CD	Quince_2015	10.1038/ajg.2015.357	IBD	1680991	1680991	9	PRJEB7576 (no deposited sequences, we accessed this data directly from the study authors)
CHR_G15_CD_5	CD	Quince_2015	10.1038/ajg.2015.357	IBD	8055337	8055337	26	PRJEB7576 (no deposited sequences, we accessed this data directly from the study authors)
CHR_G21_CD_1	CD	Quince_2015	10.1038/ajg.2015.357	IBD	3218384	3218384	12	PRJEB7576 (no deposited sequences, we accessed this data directly from the study authors)
CHR_G21_CD_2	CD	Quince_2015	10.1038/ajg.2015.357	IBD	7669627	7669627	10	PRJEB7576 (no deposited sequences, we accessed this data directly from the study authors)
CHR_G21_CD_3	CD	Quince_2015	10.1038/ajg.2015.357	IBD	7994420	7994420	2	PRJEB7576 (no deposited sequences, we accessed this data directly from the study authors)
CHR_G33_CD_1	CD	Quince_2015	10.1038/ajg.2015.357	IBD	371441	371441	2	PRJEB7576 (no deposited sequences, we accessed this data directly from the study authors)
CHR_G33_CD_2	CD	Quince_2015	10.1038/ajg.2015.357	IBD	3276987	3276987	14	PRJEB7576 (no deposited sequences, we accessed this data directly from the study authors)
CHR_G33_CD_3	CD	Quince_2015	10.1038/ajg.2015.357	IBD	5164026	5164026	14	PRJEB7576 (no deposited sequences, we accessed this data directly from the study authors)
CHR_G33_CD_4	CD	Quince_2015	10.1038/ajg.2015.357	IBD	7026127	7026127	16	PRJEB7576 (no deposited sequences, we accessed this data directly from the study authors)
CHR_G33_CD_5	CD	Quince_2015	10.1038/ajg.2015.357	IBD	3796544	3796544	12	PRJEB7576 (no deposited sequences, we accessed this data directly from the study authors)
CHR_G28_CONTROL_1	HEALTHY	Quince_2015	10.1038/ajg.2015.357	HEALTHY	3759222	3759222	17	PRJEB7576 (no deposited sequences, we accessed this data directly from the study authors)
CHR_G56_CONTROL_1	HEALTHY	Quince_2015	10.1038/ajg.2015.357	HEALTHY	4861761	4861761	22	PRJEB7576 (no deposited sequences, we accessed this data directly from the study authors)
CHR_G50_CONTROL_1	HEALTHY	Quince_2015	10.1038/ajg.2015.357	HEALTHY	2719099	2719099	13	PRJEB7576 (no deposited sequences, we accessed this data directly from the study authors)
CHR_G51_CONTROL_1	HEALTHY	Quince_2015	10.1038/ajg.2015.357	HEALTHY	3686993	3686993	16	PRJEB7576 (no deposited sequences, we accessed this data directly from the study authors)
CHR_G52_CONTROL_1	HEALTHY	Quince_2015	10.1038/ajg.2015.357	HEALTHY	4910484	4910484	24	PRJEB7576 (no deposited sequences, we accessed this data directly from the study authors)
CHR_G53_CONTROL_1	HEALTHY	Quince_2015	10.1038/ajg.2015.357	HEALTHY	5290973	5290973	26	PRJEB7576 (no deposited sequences, we accessed this data directly from the study authors)
CHR_G61_CONTROL_1	HEALTHY	Quince_2015	10.1038/ajg.2015.357	HEALTHY	6138981	6138981	27	PRJEB7576 (no deposited sequences, we accessed this data directly from the study authors)
CHR_G25_CONTROL_1	HEALTHY	Quince_2015	10.1038/ajg.2015.357	HEALTHY	7199084	7199084	23	PRJEB7576 (no deposited sequences, we accessed this data directly from the study authors)
CHR_G29_CONTROL_1	HEALTHY	Quince_2015	10.1038/ajg.2015.357	HEALTHY	2781503	2781503	14	PRJEB7576 (no deposited sequences, we accessed this data directly from the study authors)
CHR_G30_CONTROL_1	HEALTHY	Quince_2015	10.1038/ajg.2015.357	HEALTHY	3877302	3877302	15	PRJEB7576 (no deposited sequences, we accessed this data directly from the study authors)
CHR_G31_CONTROL_1	HEALTHY	Quince_2015	10.1038/ajg.2015.357	HEALTHY	4978951	4978951	20	PRJEB7576 (no deposited sequences, we accessed this data directly from the study authors)
CHR_G32_CONTROL_1	HEALTHY	Quince_2015	10.1038/ajg.2015.357	HEALTHY	4514464	4514464	19	PRJEB7576 (no deposited sequences, we accessed this data directly from the study authors)
CHR_G13_CONTROL_1	HEALTHY	Quince_2015	10.1038/ajg.2015.357	HEALTHY	5915502	5915502	26	PRJEB7576 (no deposited sequences, we accessed this data directly from the study authors)
n_209_V5_M_118_non_pouchitis_1	UC	Vineis_2016	10.1128/mBio.01713-16	IBD	24561093	0	23	SRR5548417
n_209_V6_M_229_non_pouchitis_2	UC	Vineis_2016	10.1128/mBio.01713-16	IBD	28294520	0	18	SRR5548421
n_209_V7_M_348_non_pouchitis_3	UC	Vineis_2016	10.1128/mBio.01713-16	IBD	45782126	0	15	SRR5548425
n_210_V10_M_720_non_pouchitis_7	UC	Vineis_2016	10.1128/mBio.01713-16	IBD	38494479	0	35	SRR5548519
n_210_V2_M_19_non_pouchitis_1	UC	Vineis_2016	10.1128/mBio.01713-16	IBD	5136135	0	6	SRR5548454
n_210_V3_M_33_non_pouchitis_2	UC	Vineis_2016	10.1128/mBio.01713-16	IBD	300591	0	0	SRR5548469
n_210_V4_M_61_non_pouchitis_3	UC	Vineis_2016	10.1128/mBio.01713-16	IBD	4402663	0	7	SRR5548484
n_210_V5_M_117_non_pouchitis_4	UC	Vineis_2016	10.1128/mBio.01713-16	IBD	42616294	0	31	SRR5548496
n_210_V6_M_265_non_pouchitis_5	UC	Vineis_2016	10.1128/mBio.01713-16	IBD	42258558	0	34	SRR5548499
n_210_V7_M_368_non_pouchitis_6	UC	Vineis_2016	10.1128/mBio.01713-16	IBD	53943442	0	54	SRR5548505
n_211_V10_M_714_non_pouchitis_4	UC	Vineis_2016	10.1128/mBio.01713-16	IBD	45452617	0	19	SRR5548546
n_211_V5_M_117_non_pouchitis_1	UC	Vineis_2016	10.1128/mBio.01713-16	IBD	46217365	0	36	SRR5548527
n_211_V6_M_229_non_pouchitis_2	UC	Vineis_2016	10.1128/mBio.01713-16	IBD	50000512	0	20	SRR5548531
n_211_V7_M_369_non_pouchitis_3	UC	Vineis_2016	10.1128/mBio.01713-16	IBD	29846973	0	21	SRR5548535
n_212_V10_M_720_non_pouchitis_4	UC	Vineis_2016	10.1128/mBio.01713-16	IBD	60173347	0	30	SRR5548572
n_212_V5_M_120_non_pouchitis_1	UC	Vineis_2016	10.1128/mBio.01713-16	IBD	36590407	0	19	SRR5548558
n_212_V6_M_239_non_pouchitis_2	UC	Vineis_2016	10.1128/mBio.01713-16	IBD	41557976	0	21	SRR5548562
n_212_V7_M_359_non_pouchitis_3	UC	Vineis_2016	10.1128/mBio.01713-16	IBD	51249909	0	25	SRR5548566
n_213_V10_M_722_non_pouchitis_4	UC	Vineis_2016	10.1128/mBio.01713-16	IBD	32904270	0	24	SRR5548596
n_213_V5_M_126_non_pouchitis_1	UC	Vineis_2016	10.1128/mBio.01713-16	IBD	52494732	0	25	SRR5548581
n_213_V6_M_231_non_pouchitis_2	UC	Vineis_2016	10.1128/mBio.01713-16	IBD	48246072	0	35	SRR5548584
n_213_V7_M_359_non_pouchitis_3	UC	Vineis_2016	10.1128/mBio.01713-16	IBD	43498008	0	20	SRR5548588
n_216_V10_M_721_non_pouchitis_4	UC	Vineis_2016	10.1128/mBio.01713-16	IBD	31864666	0	19	SRR5548675
n_216_V5_M_121_non_pouchitis_1	UC	Vineis_2016	10.1128/mBio.01713-16	IBD	20524383	0	12	SRR5548661
n_216_V6_M_233_non_pouchitis_2	UC	Vineis_2016	10.1128/mBio.01713-16	IBD	32811313	0	24	SRR5548665
n_216_V7_M_374_non_pouchitis_3	UC	Vineis_2016	10.1128/mBio.01713-16	IBD	7636587	0	4	SRR5548668
n_217_V10_M_720_non_pouchitis_4	UC	Vineis_2016	10.1128/mBio.01713-16	IBD	26453103	0	14	SRR5548705
n_217_V5_M_121_non_pouchitis_1	UC	Vineis_2016	10.1128/mBio.01713-16	IBD	21628446	0	8	SRR5548685
n_217_V6_M_235_non_pouchitis_2	UC	Vineis_2016	10.1128/mBio.01713-16	IBD	35551559	0	13	SRR5548688
n_217_V7_M_350_non_pouchitis_3	UC	Vineis_2016	10.1128/mBio.01713-16	IBD	18188983	0	16	SRR5548692
n_423_V5_M_127_non_pouchitis_1	UC	Vineis_2016	10.1128/mBio.01713-16	IBD	22516321	0	13	SRR5548877
n_423_V6_M_232_non_pouchitis_2	UC	Vineis_2016	10.1128/mBio.01713-16	IBD	45023947	0	16	SRR5548889
n_423_V7_M_355_non_pouchitis_3	UC	Vineis_2016	10.1128/mBio.01713-16	IBD	79271127	0	23	SRR5548896
n_427_V5_M_122_non_pouchitis_1	UC	Vineis_2016	10.1128/mBio.01713-16	IBD	7646942	0	7	SRR5548903
n_427_V6_M_234_non_pouchitis_2	UC	Vineis_2016	10.1128/mBio.01713-16	IBD	29207555	0	12	SRR5548910
n_427_V7_M_360_non_pouchitis_3	UC	Vineis_2016	10.1128/mBio.01713-16	IBD	12831732	0	14	SRR5548917
n_503_V5_M_126_non_pouchitis_1	UC	Vineis_2016	10.1128/mBio.01713-16	IBD	30283759	0	22	SRR5548976
n_503_V6_M_271_non_pouchitis_2	UC	Vineis_2016	10.1128/mBio.01713-16	IBD	47308159	0	27	SRR5548980
n_503_V7_M_412_non_pouchitis_3	UC	Vineis_2016	10.1128/mBio.01713-16	IBD	44220586	0	20	SRR5548989
p_200_V10_M_731_without_inflamation_5	UC	Vineis_2016	10.1128/mBio.01713-16	IBD	58746620	0	18	SRR5548104
p_200_V12_M_282_inflamation_1	UC	Vineis_2016	10.1128/mBio.01713-16	IBD	55388004	0	24	SRR5548111
p_200_V13_M_352_inflamation_2	UC	Vineis_2016	10.1128/mBio.01713-16	IBD	12248106	0	10	SRR5548116
p_200_V8_M_492_without_inflamation_3	UC	Vineis_2016	10.1128/mBio.01713-16	IBD	6047532	0	5	SRR5548091
p_200_V9_M_611_without_inflamation_4	UC	Vineis_2016	10.1128/mBio.01713-16	IBD	7575002	0	7	SRR5548098
p_202_V10_M_743_without_inflamation_6	UC	Vineis_2016	10.1128/mBio.01713-16	IBD	41542372	0	15	SRR5548156
p_202_V11_M_301_inflamation_3	UC	Vineis_2016	10.1128/mBio.01713-16	IBD	33366008	0	12	SRR5548159
p_202_V12_M_329_antibiotic_4	UC	Vineis_2016	10.1128/mBio.01713-16	IBD	39402038	0	20	SRR5548162
p_202_V5_M_117_without_inflamation_1	UC	Vineis_2016	10.1128/mBio.01713-16	IBD	24751302	0	12	SRR5548143
p_202_V6_M_238_without_inflamation_2	UC	Vineis_2016	10.1128/mBio.01713-16	IBD	35253671	0	21	SRR5548148
p_202_V7_M_357_without_inflamation_5	UC	Vineis_2016	10.1128/mBio.01713-16	IBD	16737964	0	20	SRR5548151
p_204_V10_M_785_without_inflamation_6	UC	Vineis_2016	10.1128/mBio.01713-16	IBD	35739003	0	13	SRR5548210
p_204_V12_M_462_antibiotic_4	UC	Vineis_2016	10.1128/mBio.01713-16	IBD	30296996	0	14	SRR5548214
p_204_V5_M_187_without_inflamation_1	UC	Vineis_2016	10.1128/mBio.01713-16	IBD	32752585	0	29	SRR5548190
p_204_V6_M_308_without_inflamation_2	UC	Vineis_2016	10.1128/mBio.01713-16	IBD	30610597	0	12	SRR5548194
p_204_V7_M_434_inflamation_3	UC	Vineis_2016	10.1128/mBio.01713-16	IBD	14623887	0	15	SRR5548201
p_204_V9_M_673_without_inflamation_5	UC	Vineis_2016	10.1128/mBio.01713-16	IBD	23011610	0	19	SRR5548206
p_206_V11_M_482_inflamation_5	UC	Vineis_2016	10.1128/mBio.01713-16	IBD	32034840	0	21	SRR5548291
p_206_V5_M_118_without_inflamation_1	UC	Vineis_2016	10.1128/mBio.01713-16	IBD	41355771	0	19	SRR5548267
p_206_V6_M_237_without_inflamation_2	UC	Vineis_2016	10.1128/mBio.01713-16	IBD	27465131	0	17	SRR5548270
p_206_V7_M_363_without_inflamation_3	UC	Vineis_2016	10.1128/mBio.01713-16	IBD	26712267	0	8	SRR5548276
p_206_V8_M_474_without_inflamation_4	UC	Vineis_2016	10.1128/mBio.01713-16	IBD	9983662	0	4	SRR5548283
p_207_V10_M_719_inflamation_7	UC	Vineis_2016	10.1128/mBio.01713-16	IBD	31557512	0	8	SRR5548369
p_207_V12_M_525_antibiotic_5	UC	Vineis_2016	10.1128/mBio.01713-16	IBD	20613628	0	11	SRR5548375
p_207_V5_M_124_without_inflamation_1	UC	Vineis_2016	10.1128/mBio.01713-16	IBD	62587761	0	15	SRR5548344
p_207_V6_M_236_without_inflamation_2	UC	Vineis_2016	10.1128/mBio.01713-16	IBD	51548634	0	15	SRR5548348
p_207_V7_M_355_without_inflamation_3	UC	Vineis_2016	10.1128/mBio.01713-16	IBD	36926363	0	21	SRR5548359
p_207_V8_M_482_inflamation_4	UC	Vineis_2016	10.1128/mBio.01713-16	IBD	37751327	0	12	SRR5548362
p_207_V9_M_601_without_inflamation_6	UC	Vineis_2016	10.1128/mBio.01713-16	IBD	35794075	0	16	SRR5548366
p_208_V12_M_651_antibiotic_6	UC	Vineis_2016	10.1128/mBio.01713-16	IBD	29888092	0	29	SRR5548408
p_208_V5_M_119_without_inflamation_1	UC	Vineis_2016	10.1128/mBio.01713-16	IBD	36402869	0	35	SRR5548384
p_208_V6_M_238_without_inflamation_2	UC	Vineis_2016	10.1128/mBio.01713-16	IBD	19025514	0	18	SRR5548388
p_208_V7_M_357_without_inflamation_3	UC	Vineis_2016	10.1128/mBio.01713-16	IBD	43832913	0	14	SRR5548392
p_208_V8_M_482_without_inflamation_4	UC	Vineis_2016	10.1128/mBio.01713-16	IBD	22110274	0	5	SRR5548396
p_208_V9_M_613_inflamation_5	UC	Vineis_2016	10.1128/mBio.01713-16	IBD	28179785	0	8	SRR5548403
p_214_V12_M_519_antibiotic_5	UC	Vineis_2016	10.1128/mBio.01713-16	IBD	21993603	0	16	SRR5548627
p_214_V5_M_119_without_inflamation_1	UC	Vineis_2016	10.1128/mBio.01713-16	IBD	15085199	0	6	SRR5548607
p_214_V6_M_231_without_inflamation_2	UC	Vineis_2016	10.1128/mBio.01713-16	IBD	51341647	0	20	SRR5548611
p_214_V7_M_358_without_inflamation_3	UC	Vineis_2016	10.1128/mBio.01713-16	IBD	49490381	0	15	SRR5548619
p_214_V8_M_484_inflamation_4	UC	Vineis_2016	10.1128/mBio.01713-16	IBD	45052288	0	10	SRR5548622
p_215_V10_M_717_without_inflamation_3	UC	Vineis_2016	10.1128/mBio.01713-16	IBD	95863264	0	31	SRR5548648
p_215_V6_M_248_without_inflamation_1	UC	Vineis_2016	10.1128/mBio.01713-16	IBD	39910907	0	22	SRR5548636
p_215_V7_M_371_without_inflamation_2	UC	Vineis_2016	10.1128/mBio.01713-16	IBD	46011981	0	21	SRR5548638
p_218_V11_M_301_inflamation_3	UC	Vineis_2016	10.1128/mBio.01713-16	IBD	13708419	0	10	SRR5548743
p_218_V12_M_331_antibiotic_4	UC	Vineis_2016	10.1128/mBio.01713-16	IBD	16069209	0	7	SRR5548748
p_218_V5_M_120_without_inflamation_1	UC	Vineis_2016	10.1128/mBio.01713-16	IBD	13079823	0	2	SRR5548723
p_218_V6_M_238_without_inflamation_2	UC	Vineis_2016	10.1128/mBio.01713-16	IBD	38543142	0	25	SRR5548730
p_218_V7_M_360_without_inflamation_5	UC	Vineis_2016	10.1128/mBio.01713-16	IBD	10759607	0	7	SRR5548737
p_219_V11_M_211_inflamation_2	UC	Vineis_2016	10.1128/mBio.01713-16	IBD	19087635	0	4	SRR5548758
p_219_V12_M_239_antibiotic_3	UC	Vineis_2016	10.1128/mBio.01713-16	IBD	20053144	0	7	SRR5548761
p_219_V5_M_110_without_inflamation_1	UC	Vineis_2016	10.1128/mBio.01713-16	IBD	5218078	0	2	SRR5548753
p_500_V5_M_120_without_inflamation_1	UC	Vineis_2016	10.1128/mBio.01713-16	IBD	34088108	0	21	SRR5548923
p_500_V6_M_260_without_inflamation_2	UC	Vineis_2016	10.1128/mBio.01713-16	IBD	43332590	0	24	SRR5548932
p_500_V7_M_365_without_inflamation_3	UC	Vineis_2016	10.1128/mBio.01713-16	IBD	33632520	0	31	SRR5548937
p_502_V5_M_120_without_inflamation_1	UC	Vineis_2016	10.1128/mBio.01713-16	IBD	60381866	0	23	SRR5548953
p_502_V6_M_234_without_inflamation_2	UC	Vineis_2016	10.1128/mBio.01713-16	IBD	38486593	0	24	SRR5548960
C3001C10_MGX	CD	Schirmir_2018	10.1038/s41564-017-0089-z	IBD	20128408	20128408	6	SRR5947852
C3001C1_MGX	CD	Schirmir_2018	10.1038/s41564-017-0089-z	IBD	9244365	9244365	5	SRR5983412
C3001C2_MGX	CD	Schirmir_2018	10.1038/s41564-017-0089-z	IBD	15359260	15359260	4	SRR5983409
C3001C3_MGX	CD	Schirmir_2018	10.1038/s41564-017-0089-z	IBD	20860426	20860426	6	SRR5983415
C3001C4_MGX	CD	Schirmir_2018	10.1038/s41564-017-0089-z	IBD	16484575	16484575	7	SRR5983414
C3001C5_MGX	CD	Schirmir_2018	10.1038/s41564-017-0089-z	IBD	14037806	14037806	9	SRR5947826
C3001C7_MGX	CD	Schirmir_2018	10.1038/s41564-017-0089-z	IBD	15114045	15114045	6	SRR5983306
C3001C8_MGX	CD	Schirmir_2018	10.1038/s41564-017-0089-z	IBD	15812288	15812288	7	SRR5983343
C3001C9_MGX	CD	Schirmir_2018	10.1038/s41564-017-0089-z	IBD	14221457	14221457	7	SRR5947876
C3002C1_MGX	CD	Schirmir_2018	10.1038/s41564-017-0089-z	IBD	9412143	9412143	5	SRR5947832
C3002C2_MGX	CD	Schirmir_2018	10.1038/s41564-017-0089-z	IBD	11667376	11667376	6	SRR5983388
C3002C3_MGX	CD	Schirmir_2018	10.1038/s41564-017-0089-z	IBD	19687248	19687248	7	SRR5983392
C3002C4_MGX	CD	Schirmir_2018	10.1038/s41564-017-0089-z	IBD	26083329	26083329	9	SRR5983313
C3002C5_MGX	CD	Schirmir_2018	10.1038/s41564-017-0089-z	IBD	17500710	17500710	7	SRR5983344
C3002C6_MGX	CD	Schirmir_2018	10.1038/s41564-017-0089-z	IBD	14462917	14462917	5	SRR5947883
C3002C7_MGX	CD	Schirmir_2018	10.1038/s41564-017-0089-z	IBD	20132264	20132264	6	SRR5947854
C3003C2_MGX	UC	Schirmir_2018	10.1038/s41564-017-0089-z	IBD	21617148	21617148	11	SRR5983391
C3003C3_MGX	UC	Schirmir_2018	10.1038/s41564-017-0089-z	IBD	24138021	24138021	12	SRR5947823
C3003C5_MGX	UC	Schirmir_2018	10.1038/s41564-017-0089-z	IBD	12195382	12195382	9	SRR5947849
C3003C7_MGX	UC	Schirmir_2018	10.1038/s41564-017-0089-z	IBD	19467912	19467912	7	SRR5947808
C3004C1_MGX	UC	Schirmir_2018	10.1038/s41564-017-0089-z	IBD	14855230	14855230	6	SRR5983393
C3004C3_MGX	UC	Schirmir_2018	10.1038/s41564-017-0089-z	IBD	16900556	16900556	12	SRR5947878
C3004C4_MGX	UC	Schirmir_2018	10.1038/s41564-017-0089-z	IBD	18096905	18096905	11	SRR5983337
C3004C5_MGX	UC	Schirmir_2018	10.1038/s41564-017-0089-z	IBD	23702021	23702021	10	SRR5947882
C3004C6_MGX	UC	Schirmir_2018	10.1038/s41564-017-0089-z	IBD	16133695	16133695	8	SRR5947867
C3005C2_MGX	UC	Schirmir_2018	10.1038/s41564-017-0089-z	IBD	19439013	19439013	14	SRR5947857
C3005C3_MGX	UC	Schirmir_2018	10.1038/s41564-017-0089-z	IBD	13410728	13410728	11	SRR5983338
C3005C5_MGX	UC	Schirmir_2018	10.1038/s41564-017-0089-z	IBD	16832018	16832018	11	SRR5947848
C3005C6_MGX	UC	Schirmir_2018	10.1038/s41564-017-0089-z	IBD	23270122	23270122	13	SRR5947866
C3006C1_MGX	UC	Schirmir_2018	10.1038/s41564-017-0089-z	IBD	17766885	17766885	12	SRR5947869
C3006C2_MGX	UC	Schirmir_2018	10.1038/s41564-017-0089-z	IBD	19390132	19390132	13	SRR5947884
C3006C4_MGX	UC	Schirmir_2018	10.1038/s41564-017-0089-z	IBD	23298147	23298147	20	SRR5947880
C3007C1_MGX	CD	Schirmir_2018	10.1038/s41564-017-0089-z	IBD	11708087	11708087	3	SRR5983308
C3007C2_MGX	CD	Schirmir_2018	10.1038/s41564-017-0089-z	IBD	12257089	12257089	5	SRR5947875
C3007C4_MGX	CD	Schirmir_2018	10.1038/s41564-017-0089-z	IBD	4850534	4850534	5	SRR5983467
C3008C1_MGX	CD	Schirmir_2018	10.1038/s41564-017-0089-z	IBD	15071137	15071137	7	SRR5947851
C3008C3_MGX	CD	Schirmir_2018	10.1038/s41564-017-0089-z	IBD	15167881	15167881	4	SRR5983471
C3008C4_MGX	CD	Schirmir_2018	10.1038/s41564-017-0089-z	IBD	10336032	10336032	3	SRR5983278
C3009C3_MGX	CD	Schirmir_2018	10.1038/s41564-017-0089-z	IBD	15340062	15340062	11	SRR5983472
C3010C1_MGX	CD	Schirmir_2018	10.1038/s41564-017-0089-z	IBD	15479169	15479169	10	SRR5983469
C3010C4_MGX	CD	Schirmir_2018	10.1038/s41564-017-0089-z	IBD	12273498	12273498	8	SRR5983444
C3010C5_MGX	CD	Schirmir_2018	10.1038/s41564-017-0089-z	IBD	7998426	7998426	5	SRR5983407
C3011C10_MGX	UC	Schirmir_2018	10.1038/s41564-017-0089-z	IBD	14244351	14244351	15	SRR5983375
C3011C16_MGX	UC	Schirmir_2018	10.1038/s41564-017-0089-z	IBD	7589650	7589650	5	SRR5983397
C3011C18_MGX	UC	Schirmir_2018	10.1038/s41564-017-0089-z	IBD	2313565	2313565	1	SRR5983316
C3011C1_MGX	UC	Schirmir_2018	10.1038/s41564-017-0089-z	IBD	11876869	11876869	10	SRR5983448
C3011C20_MGX	UC	Schirmir_2018	10.1038/s41564-017-0089-z	IBD	16378907	16378907	9	SRR5983295
C3011C22_MGX	UC	Schirmir_2018	10.1038/s41564-017-0089-z	IBD	7624503	7624503	7	SRR5983323
C3011C24_MGX	UC	Schirmir_2018	10.1038/s41564-017-0089-z	IBD	8574342	8574342	6	SRR5983285
C3011C2_MGX	UC	Schirmir_2018	10.1038/s41564-017-0089-z	IBD	9525201	9525201	3	SRR5983445
C3011C4_MGX	UC	Schirmir_2018	10.1038/s41564-017-0089-z	IBD	13260095	13260095	11	SRR5983447
C3011C5_MGX	UC	Schirmir_2018	10.1038/s41564-017-0089-z	IBD	10219893	10219893	7	SRR5983440
C3011C6_MGX	UC	Schirmir_2018	10.1038/s41564-017-0089-z	IBD	11882445	11882445	10	SRR5983437
C3011C7_MGX	UC	Schirmir_2018	10.1038/s41564-017-0089-z	IBD	4885503	4885503	3	SRR5983443
C3011C8_MGX	UC	Schirmir_2018	10.1038/s41564-017-0089-z	IBD	1892844	1892844	3	SRR5983385
C3011C9_MGX	UC	Schirmir_2018	10.1038/s41564-017-0089-z	IBD	9945264	9945264	8	SRR5983483
C3012C1_MGX	CD	Schirmir_2018	10.1038/s41564-017-0089-z	IBD	4245480	4245480	3	SRR5983279
C3013C10_MGX	UC	Schirmir_2018	10.1038/s41564-017-0089-z	IBD	880221	880221	1	SRR5983426
C3013C11_MGX	UC	Schirmir_2018	10.1038/s41564-017-0089-z	IBD	6460297	6460297	1	SRR5983364
C3013C12_MGX	UC	Schirmir_2018	10.1038/s41564-017-0089-z	IBD	14682405	14682405	4	SRR5983368
C3013C14_MGX	UC	Schirmir_2018	10.1038/s41564-017-0089-z	IBD	4426778	4426778	2	SRR5983353
C3013C17_MGX	UC	Schirmir_2018	10.1038/s41564-017-0089-z	IBD	7597137	7597137	4	SRR5983351
C3013C1_MGX	UC	Schirmir_2018	10.1038/s41564-017-0089-z	IBD	3469839	3469839	5	SRR5983275
C3013C20_MGX	UC	Schirmir_2018	10.1038/s41564-017-0089-z	IBD	7076302	7076302	2	SRR5983320
C3013C22_MGX	UC	Schirmir_2018	10.1038/s41564-017-0089-z	IBD	12337823	12337823	11	SRR5983302
C3013C2_MGX	UC	Schirmir_2018	10.1038/s41564-017-0089-z	IBD	33111816	33111816	10	SRR5983458
C3013C5_MGX	UC	Schirmir_2018	10.1038/s41564-017-0089-z	IBD	4141446	4141446	0	SRR5983442
C3013C6_MGX	UC	Schirmir_2018	10.1038/s41564-017-0089-z	IBD	4695331	4695331	3	SRR5983374
C3013C7_MGX	UC	Schirmir_2018	10.1038/s41564-017-0089-z	IBD	8216212	8216212	4	SRR5983361
C3013C8_MGX	UC	Schirmir_2018	10.1038/s41564-017-0089-z	IBD	9229711	9229711	4	SRR5983322
C3013C9_MGX	UC	Schirmir_2018	10.1038/s41564-017-0089-z	IBD	4988772	4988772	1	SRR5983383
C3015C1_MGX	UC	Schirmir_2018	10.1038/s41564-017-0089-z	IBD	16056301	16056301	5	SRR5983446
C3016C1_MGX	CD	Schirmir_2018	10.1038/s41564-017-0089-z	IBD	9167253	9167253	6	SRR5983422
C3017C10_MGX	CD	Schirmir_2018	10.1038/s41564-017-0089-z	IBD	16614089	16614089	10	SRR5983369
C3017C12_MGX	CD	Schirmir_2018	10.1038/s41564-017-0089-z	IBD	12409391	12409391	7	SRR5983332
C3017C14_MGX	CD	Schirmir_2018	10.1038/s41564-017-0089-z	IBD	16390098	16390098	6	SRR5983334
C3017C16_MGX	CD	Schirmir_2018	10.1038/s41564-017-0089-z	IBD	11603285	11603285	9	SRR5983298
C3017C18_MGX	CD	Schirmir_2018	10.1038/s41564-017-0089-z	IBD	9469559	9469559	5	SRR5983324
C3017C1_MGX	CD	Schirmir_2018	10.1038/s41564-017-0089-z	IBD	15211913	15211913	6	SRR5983441
C3017C20_MGX	CD	Schirmir_2018	10.1038/s41564-017-0089-z	IBD	11521552	11521552	7	SRR5983286
C3017C22_MGX	CD	Schirmir_2018	10.1038/s41564-017-0089-z	IBD	10287050	10287050	5	SRR5983293
C3017C24_MGX	CD	Schirmir_2018	10.1038/s41564-017-0089-z	IBD	14237610	14237610	7	SRR5983266
C3017C2_MGX	CD	Schirmir_2018	10.1038/s41564-017-0089-z	IBD	7401983	7401983	6	SRR5983333
C3017C3_MGX	CD	Schirmir_2018	10.1038/s41564-017-0089-z	IBD	11559495	11559495	7	SRR5983439
C3017C4_MGX	CD	Schirmir_2018	10.1038/s41564-017-0089-z	IBD	19469651	19469651	6	SRR5983358
C3017C7_MGX	CD	Schirmir_2018	10.1038/s41564-017-0089-z	IBD	12897931	12897931	7	SRR5983378
C3017C8_MGX	CD	Schirmir_2018	10.1038/s41564-017-0089-z	IBD	11993129	11993129	5	SRR5983381
C3017C9_MGX	CD	Schirmir_2018	10.1038/s41564-017-0089-z	IBD	6620730	6620730	7	SRR5983399
C3019C2_MGX	CD	Schirmir_2018	10.1038/s41564-017-0089-z	IBD	7481306	7481306	6	SRR5983386
C3020C1_MGX	CD	Schirmir_2018	10.1038/s41564-017-0089-z	IBD	6692408	6692408	3	SRR5983459
C3022C2_MGX	NONIBD	Schirmir_2018	10.1038/s41564-017-0089-z	NONIBD	10834569	10834569	9	SRR5983379
C3022C3_MGX	NONIBD	Schirmir_2018	10.1038/s41564-017-0089-z	NONIBD	19382708	19382708	14	SRR5983429
C3023C2_MGX	CD	Schirmir_2018	10.1038/s41564-017-0089-z	IBD	18859458	18859458	11	SRR5983360
C3024C1_MGX	CD	Schirmir_2018	10.1038/s41564-017-0089-z	IBD	4497616	4497616	2	SRR5983377
C3027C1_MGX	CD	Schirmir_2018	10.1038/s41564-017-0089-z	IBD	8944039	8944039	4	SRR5983371
C3029C3_MGX	UC	Schirmir_2018	10.1038/s41564-017-0089-z	IBD	4890211	4890211	2	SRR5983406
C3030C1_MGX	CD	Schirmir_2018	10.1038/s41564-017-0089-z	IBD	17878937	17878937	9	SRR5983367
C3031C1_MGX	CD	Schirmir_2018	10.1038/s41564-017-0089-z	IBD	3903475	3903475	3	SRR5983365
C3032C7_MGX	UC	Schirmir_2018	10.1038/s41564-017-0089-z	IBD	11570547	11570547	8	SRR5983300
C3033C3_MGX	CD	Schirmir_2018	10.1038/s41564-017-0089-z	IBD	5907215	5907215	1	SRR5983283
C3034C1_MGX	UC	Schirmir_2018	10.1038/s41564-017-0089-z	IBD	1715752	1715752	1	SRR5983289
C3036C1_MGX	UC	Schirmir_2018	10.1038/s41564-017-0089-z	IBD	7905624	7905624	4	SRR5983294
C3037C2_MGX	UC	Schirmir_2018	10.1038/s41564-017-0089-z	IBD	8355028	8355028	6	SRR5983264
E5001C1_MGX	CD	Schirmir_2018	10.1038/s41564-017-0089-z	IBD	10470209	10470209	4	SRR5947814
E5001C2_MGX	CD	Schirmir_2018	10.1038/s41564-017-0089-z	IBD	17881054	17881054	6	SRR5947817
E5001C3_MGX	CD	Schirmir_2018	10.1038/s41564-017-0089-z	IBD	10447790	10447790	4	SRR5983413
E5001C4_MGX	CD	Schirmir_2018	10.1038/s41564-017-0089-z	IBD	17808778	17808778	8	SRR5947835
E5001C7_MGX	CD	Schirmir_2018	10.1038/s41564-017-0089-z	IBD	12415479	12415479	6	SRR5947870
E5001C8_MGX	CD	Schirmir_2018	10.1038/s41564-017-0089-z	IBD	4513864	4513864	2	SRR5947844
E5001C9_MGX	CD	Schirmir_2018	10.1038/s41564-017-0089-z	IBD	1834745	1834745	1	SRR5947856
E5002C2_MGX	NONIBD	Schirmir_2018	10.1038/s41564-017-0089-z	NONIBD	12229195	12229195	11	SRR5947831
E5002C3_MGX	NONIBD	Schirmir_2018	10.1038/s41564-017-0089-z	NONIBD	14525570	14525570	13	SRR5983390
E5002C4_MGX	NONIBD	Schirmir_2018	10.1038/s41564-017-0089-z	NONIBD	10094877	10094877	8	SRR5947864
E5002C5_MGX	NONIBD	Schirmir_2018	10.1038/s41564-017-0089-z	NONIBD	10523068	10523068	3	SRR5947828
E5002C6_MGX	NONIBD	Schirmir_2018	10.1038/s41564-017-0089-z	NONIBD	18109493	18109493	8	SRR5947871
E5003C2_MGX	CD	Schirmir_2018	10.1038/s41564-017-0089-z	IBD	9387876	9387876	15	SRR5983418
E5004C2_MGX	UC	Schirmir_2018	10.1038/s41564-017-0089-z	IBD	14328176	14328176	7	SRR5947860
E5004C3_MGX	UC	Schirmir_2018	10.1038/s41564-017-0089-z	IBD	20119593	20119593	10	SRR5983395
E5004C4_MGX	UC	Schirmir_2018	10.1038/s41564-017-0089-z	IBD	13339502	13339502	11	SRR5983312
E5004C6_MGX	UC	Schirmir_2018	10.1038/s41564-017-0089-z	IBD	17313663	17313663	12	SRR5983303
E5006C1_MGX	CD	Schirmir_2018	10.1038/s41564-017-0089-z	IBD	16468466	16468466	11	SRR5947859
E5006C2_MGX	CD	Schirmir_2018	10.1038/s41564-017-0089-z	IBD	10508684	10508684	9	SRR5947874
E5008C2_MGX	UC	Schirmir_2018	10.1038/s41564-017-0089-z	IBD	5001293	5001293	4	SRR5983342
E5008C3_MGX	UC	Schirmir_2018	10.1038/s41564-017-0089-z	IBD	8785980	8785980	4	SRR5947843
E5008C4_MGX	UC	Schirmir_2018	10.1038/s41564-017-0089-z	IBD	10957436	10957436	7	SRR5983466
E5009C3_MGX	CD	Schirmir_2018	10.1038/s41564-017-0089-z	IBD	11257301	11257301	5	SRR5983277
E5013C1_MGX	CD	Schirmir_2018	10.1038/s41564-017-0089-z	IBD	12573751	12573751	7	SRR5983272
E5019C1_MGX	CD	Schirmir_2018	10.1038/s41564-017-0089-z	IBD	10681218	10681218	7	SRR5983427
E5022C2_MGX	UC	Schirmir_2018	10.1038/s41564-017-0089-z	IBD	21348477	21348477	9	SRR5983326
E5023C2_MGX	CD	Schirmir_2018	10.1038/s41564-017-0089-z	IBD	5330941	5330941	1	SRR5983314
H4001C10_MGX	CD	Schirmir_2018	10.1038/s41564-017-0089-z	IBD	13584589	13584589	7	SRR5947853
H4001C4_MGX	CD	Schirmir_2018	10.1038/s41564-017-0089-z	IBD	2183855	2183855	1	SRR5947818
H4001C5_MGX	CD	Schirmir_2018	10.1038/s41564-017-0089-z	IBD	18000450	18000450	6	SRR5983389
H4001C6_MGX	CD	Schirmir_2018	10.1038/s41564-017-0089-z	IBD	12892071	12892071	7	SRR5947863
H4001C7_MGX	CD	Schirmir_2018	10.1038/s41564-017-0089-z	IBD	14138554	14138554	5	SRR5983396
H4001C8_MGX	CD	Schirmir_2018	10.1038/s41564-017-0089-z	IBD	7347655	7347655	4	SRR5983339
H4001C9_MGX	CD	Schirmir_2018	10.1038/s41564-017-0089-z	IBD	8774283	8774283	1	SRR5947839
H4004C2_MGX	CD	Schirmir_2018	10.1038/s41564-017-0089-z	IBD	8051151	8051151	3	SRR5947830
H4004C3_MGX	CD	Schirmir_2018	10.1038/s41564-017-0089-z	IBD	13731190	13731190	4	SRR5983340
H4006C3_MGX	CD	Schirmir_2018	10.1038/s41564-017-0089-z	IBD	8472283	8472283	8	SRR5947842
H4006C4_MGX	CD	Schirmir_2018	10.1038/s41564-017-0089-z	IBD	10658229	10658229	8	SRR5947847
H4006C5_MGX	CD	Schirmir_2018	10.1038/s41564-017-0089-z	IBD	15497506	15497506	12	SRR5983477
H4007C1_MGX	CD	Schirmir_2018	10.1038/s41564-017-0089-z	IBD	14857816	14857816	6	SRR5983346
H4007C4_MGX	CD	Schirmir_2018	10.1038/s41564-017-0089-z	IBD	13953590	13953590	7	SRR5983468
H4008C10_MGX	NONIBD	Schirmir_2018	10.1038/s41564-017-0089-z	NONIBD	12135920	12135920	6	SRR5983359
H4008C11_MGX	NONIBD	Schirmir_2018	10.1038/s41564-017-0089-z	NONIBD	8404772	8404772	6	SRR5983433
H4008C13_MGX	NONIBD	Schirmir_2018	10.1038/s41564-017-0089-z	NONIBD	11006456	11006456	12	SRR5983482
H4008C15_MGX	NONIBD	Schirmir_2018	10.1038/s41564-017-0089-z	NONIBD	13218018	13218018	9	SRR5983430
H4008C17_MGX	NONIBD	Schirmir_2018	10.1038/s41564-017-0089-z	NONIBD	7795566	7795566	8	SRR5983402
H4008C19_MGX	NONIBD	Schirmir_2018	10.1038/s41564-017-0089-z	NONIBD	7763726	7763726	7	SRR5983404
H4008C1_MGX	NONIBD	Schirmir_2018	10.1038/s41564-017-0089-z	NONIBD	13584591	13584591	12	SRR5947872
H4008C21_MGX	NONIBD	Schirmir_2018	10.1038/s41564-017-0089-z	NONIBD	3218124	3218124	4	SRR5983356
H4008C22_MGX	NONIBD	Schirmir_2018	10.1038/s41564-017-0089-z	NONIBD	5610397	5610397	4	SRR5983348
H4008C2_MGX	NONIBD	Schirmir_2018	10.1038/s41564-017-0089-z	NONIBD	9327365	9327365	7	SRR5947879
H4008C3_MGX	NONIBD	Schirmir_2018	10.1038/s41564-017-0089-z	NONIBD	16498819	16498819	12	SRR5947810
H4008C4_MGX	NONIBD	Schirmir_2018	10.1038/s41564-017-0089-z	NONIBD	14353763	14353763	12	SRR5983485
H4008C5_MGX	NONIBD	Schirmir_2018	10.1038/s41564-017-0089-z	NONIBD	13596191	13596191	14	SRR5983456
H4008C6_MGX	NONIBD	Schirmir_2018	10.1038/s41564-017-0089-z	NONIBD	10859406	10859406	11	SRR5983451
H4008C7_MGX	NONIBD	Schirmir_2018	10.1038/s41564-017-0089-z	NONIBD	12714047	12714047	15	SRR5983455
H4008C8_MGX	NONIBD	Schirmir_2018	10.1038/s41564-017-0089-z	NONIBD	6776690	6776690	7	SRR5983425
H4008C9_MGX	NONIBD	Schirmir_2018	10.1038/s41564-017-0089-z	NONIBD	8691456	8691456	5	SRR5983421
H4009C10_MGX	NONIBD	Schirmir_2018	10.1038/s41564-017-0089-z	NONIBD	11826101	11826101	10	SRR5983435
H4009C11_MGX	NONIBD	Schirmir_2018	10.1038/s41564-017-0089-z	NONIBD	15901723	15901723	6	SRR5983453
H4009C13_MGX	NONIBD	Schirmir_2018	10.1038/s41564-017-0089-z	NONIBD	4992634	4992634	7	SRR5983336
H4009C16_MGX	NONIBD	Schirmir_2018	10.1038/s41564-017-0089-z	NONIBD	14612949	14612949	10	SRR5983363
H4009C18_MGX	NONIBD	Schirmir_2018	10.1038/s41564-017-0089-z	NONIBD	1359556	1359556	1	SRR5983366
H4009C1_MGX	NONIBD	Schirmir_2018	10.1038/s41564-017-0089-z	NONIBD	15356770	15356770	11	SRR5947850
H4009C20_MGX	NONIBD	Schirmir_2018	10.1038/s41564-017-0089-z	NONIBD	10595223	10595223	6	SRR5983352
H4009C22_MGX	NONIBD	Schirmir_2018	10.1038/s41564-017-0089-z	NONIBD	3316216	3316216	3	SRR5983350
H4009C2_MGX	NONIBD	Schirmir_2018	10.1038/s41564-017-0089-z	NONIBD	10837979	10837979	6	SRR5947845
H4009C3_MGX	NONIBD	Schirmir_2018	10.1038/s41564-017-0089-z	NONIBD	21971064	21971064	10	SRR5947822
H4009C4_MGX	NONIBD	Schirmir_2018	10.1038/s41564-017-0089-z	NONIBD	18125370	18125370	6	SRR5983478
H4009C5_MGX	NONIBD	Schirmir_2018	10.1038/s41564-017-0089-z	NONIBD	20826287	20826287	11	SRR5983473
H4009C6_MGX	NONIBD	Schirmir_2018	10.1038/s41564-017-0089-z	NONIBD	9168391	9168391	3	SRR5983274
H4009C8_MGX	NONIBD	Schirmir_2018	10.1038/s41564-017-0089-z	NONIBD	5156392	5156392	6	SRR5983424
H4009C9_MGX	NONIBD	Schirmir_2018	10.1038/s41564-017-0089-z	NONIBD	6197302	6197302	4	SRR5983420
H4010C1_MGX	UC	Schirmir_2018	10.1038/s41564-017-0089-z	IBD	12595337	12595337	9	SRR5947846
H4010C2_MGX	UC	Schirmir_2018	10.1038/s41564-017-0089-z	IBD	5024597	5024597	0	SRR5983465
H4010C3_MGX	UC	Schirmir_2018	10.1038/s41564-017-0089-z	IBD	4435360	4435360	0	SRR5983281
H4010C4_MGX	UC	Schirmir_2018	10.1038/s41564-017-0089-z	IBD	14980797	14980797	4	SRR5983457
H4011C1_MGX	CD	Schirmir_2018	10.1038/s41564-017-0089-z	IBD	8007666	8007666	7	SRR5983304
H4012C1_MGX	CD	Schirmir_2018	10.1038/s41564-017-0089-z	IBD	8813762	8813762	9	SRR5983462
H4013C1_MGX	NONIBD	Schirmir_2018	10.1038/s41564-017-0089-z	NONIBD	6184814	6184814	6	SRR5983280
H4013C2_MGX	NONIBD	Schirmir_2018	10.1038/s41564-017-0089-z	NONIBD	23869874	23869874	10	SRR5983449
H4013C4_MGX	NONIBD	Schirmir_2018	10.1038/s41564-017-0089-z	NONIBD	14759188	14759188	5	SRR5983454
H4013C5_MGX	NONIBD	Schirmir_2018	10.1038/s41564-017-0089-z	NONIBD	17465664	17465664	6	SRR5983461
H4014C1_MGX	CD	Schirmir_2018	10.1038/s41564-017-0089-z	IBD	3189755	3189755	3	SRR5983470
H4015C1_MGX	CD	Schirmir_2018	10.1038/s41564-017-0089-z	IBD	17759053	17759053	9	SRR5983480
H4016C1_MGX	NONIBD	Schirmir_2018	10.1038/s41564-017-0089-z	NONIBD	480969	480969	0	SRR5983484
H4016C2_MGX	NONIBD	Schirmir_2018	10.1038/s41564-017-0089-z	NONIBD	5904650	5904650	6	SRR5983408
H4016C4_MGX	NONIBD	Schirmir_2018	10.1038/s41564-017-0089-z	NONIBD	9432978	9432978	8	SRR5983345
H4016C5_MGX	NONIBD	Schirmir_2018	10.1038/s41564-017-0089-z	NONIBD	12067046	12067046	8	SRR5983432
H4017C1_MGX	CD	Schirmir_2018	10.1038/s41564-017-0089-z	IBD	17987289	17987289	11	SRR5983460
H4018C1_MGX	NONIBD	Schirmir_2018	10.1038/s41564-017-0089-z	NONIBD	1713848	1713848	1	SRR5983273
H4019C1_MGX	UC	Schirmir_2018	10.1038/s41564-017-0089-z	IBD	6085567	6085567	0	SRR5983423
H4020C2_MGX	CD	Schirmir_2018	10.1038/s41564-017-0089-z	IBD	9227216	9227216	3	SRR5983436
H4022C1_MGX	NONIBD	Schirmir_2018	10.1038/s41564-017-0089-z	NONIBD	12199595	12199595	9	SRR5983438
H4023C1_MGX	NONIBD	Schirmir_2018	10.1038/s41564-017-0089-z	NONIBD	7966378	7966378	8	SRR5983372
H4024C1_MGX	NONIBD	Schirmir_2018	10.1038/s41564-017-0089-z	NONIBD	14050700	14050700	8	SRR5983290
H4027C2_MGX	UC	Schirmir_2018	10.1038/s41564-017-0089-z	IBD	11933182	11933182	6	SRR5983400
H4028C5_MGX	CD	Schirmir_2018	10.1038/s41564-017-0089-z	IBD	15830733	15830733	9	SRR5983335
H4030C1_MGX	CD	Schirmir_2018	10.1038/s41564-017-0089-z	IBD	5664007	5664007	4	SRR5983331
H4031C1_MGX	CD	Schirmir_2018	10.1038/s41564-017-0089-z	IBD	12419743	12419743	8	SRR5983325
H4032C3_MGX	CD	Schirmir_2018	10.1038/s41564-017-0089-z	IBD	9716298	9716298	10	SRR5983317
H4035C1_MGX	UC	Schirmir_2018	10.1038/s41564-017-0089-z	IBD	7633535	7633535	4	SRR5983355
H4038C11_MGX	CD	Schirmir_2018	10.1038/s41564-017-0089-z	IBD	9422712	9422712	5	SRR5983475
H4040C1_MGX	UC	Schirmir_2018	10.1038/s41564-017-0089-z	IBD	13771981	13771981	6	SRR5983284
H4042C1_MGX	UC	Schirmir_2018	10.1038/s41564-017-0089-z	IBD	5562743	5562743	2	SRR5983291
H4044C2_MGX	UC	Schirmir_2018	10.1038/s41564-017-0089-z	IBD	13157393	13157393	7	SRR5983270
H4045C2_MGX	NONIBD	Schirmir_2018	10.1038/s41564-017-0089-z	NONIBD	6818781	6818781	7	SRR5983476
M2008C10_MGX	CD	Schirmir_2018	10.1038/s41564-017-0089-z	IBD	16569559	16569559	8	SRR5983416
M2008C11_MGX	CD	Schirmir_2018	10.1038/s41564-017-0089-z	IBD	28014234	28014234	11	SRR5983387
M2008C12_MGX	CD	Schirmir_2018	10.1038/s41564-017-0089-z	IBD	16427700	16427700	10	SRR5947858
M2008C13_MGX	CD	Schirmir_2018	10.1038/s41564-017-0089-z	IBD	11789074	11789074	6	SRR5983307
M2008C14_MGX	CD	Schirmir_2018	10.1038/s41564-017-0089-z	IBD	12832475	12832475	5	SRR5947877
M2008C16_MGX	CD	Schirmir_2018	10.1038/s41564-017-0089-z	IBD	9483960	9483960	5	SRR5983464
M2008C8_MGX	CD	Schirmir_2018	10.1038/s41564-017-0089-z	IBD	13903157	13903157	10	SRR5947815
M2010C11_MGX	CD	Schirmir_2018	10.1038/s41564-017-0089-z	IBD	2170368	2170368	2	SRR5983341
M2010C4_MGX	CD	Schirmir_2018	10.1038/s41564-017-0089-z	IBD	14819864	14819864	13	SRR5983411
M2010C8_MGX	CD	Schirmir_2018	10.1038/s41564-017-0089-z	IBD	12488080	12488080	13	SRR5983311
M2014C10_MGX	CD	Schirmir_2018	10.1038/s41564-017-0089-z	IBD	16007260	16007260	7	SRR5983347
M2014C11_MGX	CD	Schirmir_2018	10.1038/s41564-017-0089-z	IBD	18435529	18435529	7	SRR5947840
M2014C12_MGX	CD	Schirmir_2018	10.1038/s41564-017-0089-z	IBD	20060641	20060641	9	SRR5983463
M2014C3_MGX	CD	Schirmir_2018	10.1038/s41564-017-0089-z	IBD	10545988	10545988	12	SRR5947812
M2014C5_MGX	CD	Schirmir_2018	10.1038/s41564-017-0089-z	IBD	11647132	11647132	15	SRR5983419
M2014C6_MGX	CD	Schirmir_2018	10.1038/s41564-017-0089-z	IBD	15805970	15805970	14	SRR5947809
M2014C7_MGX	CD	Schirmir_2018	10.1038/s41564-017-0089-z	IBD	2241367	2241367	2	SRR5983417
M2014C8_MGX	CD	Schirmir_2018	10.1038/s41564-017-0089-z	IBD	18239884	18239884	12	SRR5947865
M2014C9_MGX	CD	Schirmir_2018	10.1038/s41564-017-0089-z	IBD	16324432	16324432	8	SRR5947827
M2021C1_MGX	CD	Schirmir_2018	10.1038/s41564-017-0089-z	IBD	17697204	17697204	12	SRR5947813
M2021C2_MGX	CD	Schirmir_2018	10.1038/s41564-017-0089-z	IBD	11078603	11078603	11	SRR5947816
M2021C3_MGX	CD	Schirmir_2018	10.1038/s41564-017-0089-z	IBD	2981457	2981457	4	SRR5947833
M2021C5_MGX	CD	Schirmir_2018	10.1038/s41564-017-0089-z	IBD	17818087	17818087	9	SRR5947868
M2021C6_MGX	CD	Schirmir_2018	10.1038/s41564-017-0089-z	IBD	20023969	20023969	11	SRR5983309
M2024C1_MGX	UC	Schirmir_2018	10.1038/s41564-017-0089-z	IBD	8007980	8007980	4	SRR5947834
M2025C1_MGX	CD	Schirmir_2018	10.1038/s41564-017-0089-z	IBD	15686632	15686632	15	SRR5947821
M2025C2_MGX	CD	Schirmir_2018	10.1038/s41564-017-0089-z	IBD	764181	764181	0	SRR5947825
M2025C3_MGX	CD	Schirmir_2018	10.1038/s41564-017-0089-z	IBD	13740686	13740686	10	SRR5947829
M2025C4_MGX	CD	Schirmir_2018	10.1038/s41564-017-0089-z	IBD	16434268	16434268	13	SRR5947873
M2025C7_MGX	CD	Schirmir_2018	10.1038/s41564-017-0089-z	IBD	17901620	17901620	15	SRR5947807
M2026C1_MGX	UC	Schirmir_2018	10.1038/s41564-017-0089-z	IBD	7215853	7215853	0	SRR5947819
M2026C2_MGX	UC	Schirmir_2018	10.1038/s41564-017-0089-z	IBD	5091381	5091381	1	SRR5947837
M2026C3_MGX	UC	Schirmir_2018	10.1038/s41564-017-0089-z	IBD	5323836	5323836	2	SRR5947861
M2026C4_MGX	UC	Schirmir_2018	10.1038/s41564-017-0089-z	IBD	11188624	11188624	4	SRR5947824
M2026C7_MGX	UC	Schirmir_2018	10.1038/s41564-017-0089-z	IBD	6424485	6424485	2	SRR5947881
M2027C1_MGX	CD	Schirmir_2018	10.1038/s41564-017-0089-z	IBD	15359972	15359972	7	SRR5947836
M2027C2_MGX	CD	Schirmir_2018	10.1038/s41564-017-0089-z	IBD	12473284	12473284	7	SRR5947862
M2027C3_MGX	CD	Schirmir_2018	10.1038/s41564-017-0089-z	IBD	23639331	23639331	9	SRR5947855
M2027C5_MGX	CD	Schirmir_2018	10.1038/s41564-017-0089-z	IBD	16534622	16534622	8	SRR5947841
M2027C6_MGX	CD	Schirmir_2018	10.1038/s41564-017-0089-z	IBD	10710855	10710855	7	SRR5947811
M2028C1_MGX	CD	Schirmir_2018	10.1038/s41564-017-0089-z	IBD	9699219	9699219	10	SRR5947838
M2028C2_MGX	CD	Schirmir_2018	10.1038/s41564-017-0089-z	IBD	18243826	18243826	8	SRR5983394
M2028C4_MGX	CD	Schirmir_2018	10.1038/s41564-017-0089-z	IBD	15611210	15611210	8	SRR5983310
M2034C4_MGX	CD	Schirmir_2018	10.1038/s41564-017-0089-z	IBD	4959397	4959397	8	SRR5983479
M2039C1_MGX	NONIBD	Schirmir_2018	10.1038/s41564-017-0089-z	NONIBD	24267238	24267238	21	SRR5947820
M2041C1_MGX	NONIBD	Schirmir_2018	10.1038/s41564-017-0089-z	NONIBD	16549836	16549836	8	SRR5983481
M2042C1_MGX	NONIBD	Schirmir_2018	10.1038/s41564-017-0089-z	NONIBD	9143505	9143505	4	SRR5983276
M2047C2_MGX	NONIBD	Schirmir_2018	10.1038/s41564-017-0089-z	NONIBD	11352873	11352873	9	SRR5983380
M2048C5_MGX	NONIBD	Schirmir_2018	10.1038/s41564-017-0089-z	NONIBD	14749433	14749433	15	SRR5983373
M2058C1_MGX	CD	Schirmir_2018	10.1038/s41564-017-0089-z	IBD	17198099	17198099	9	SRR5983428
M2059C1_MGX	UC	Schirmir_2018	10.1038/s41564-017-0089-z	IBD	6887562	6887562	1	SRR5983382
M2060C2_MGX	NONIBD	Schirmir_2018	10.1038/s41564-017-0089-z	NONIBD	5511767	5511767	6	SRR5983376
M2064C1_MGX	UC	Schirmir_2018	10.1038/s41564-017-0089-z	IBD	7035049	7035049	6	SRR5983403
M2067C6_MGX	UC	Schirmir_2018	10.1038/s41564-017-0089-z	IBD	12749042	12749042	8	SRR5983299
M2068C1_MGX	CD	Schirmir_2018	10.1038/s41564-017-0089-z	IBD	8570019	8570019	8	SRR5983357
M2069C2_MGX	UC	Schirmir_2018	10.1038/s41564-017-0089-z	IBD	21627663	21627663	10	SRR5983327
M2071C1_MGX	UC	Schirmir_2018	10.1038/s41564-017-0089-z	IBD	12455370	12455370	8	SRR5983297
M2072C4_MGX	NONIBD	Schirmir_2018	10.1038/s41564-017-0089-z	NONIBD	10695756	10695756	9	SRR5983315
M2075C4_MGX	NONIBD	Schirmir_2018	10.1038/s41564-017-0089-z	NONIBD	26105825	26105825	13	SRR5983265
M2077C1_MGX	NONIBD	Schirmir_2018	10.1038/s41564-017-0089-z	NONIBD	29795077	29795077	9	SRR5983267
M2079C1_MGX	NONIBD	Schirmir_2018	10.1038/s41564-017-0089-z	NONIBD	14963910	14963910	10	SRR5983301
M2081C4_MGX	UC	Schirmir_2018	10.1038/s41564-017-0089-z	IBD	7448898	7448898	6	SRR5983282
M2082C1_MGX	CD	Schirmir_2018	10.1038/s41564-017-0089-z	IBD	9798196	9798196	5	SRR5983474
M2085C1_MGX	CD	Schirmir_2018	10.1038/s41564-017-0089-z	IBD	475902	475902	0	SRR5983292
M2086C3_MGX	CD	Schirmir_2018	10.1038/s41564-017-0089-z	IBD	12748725	12748725	9	SRR5983450
M2091C1_MGX	UC	Schirmir_2018	10.1038/s41564-017-0089-z	IBD	11528025	11528025	16	SRR5983268
P6005C1_MGX	CD	Schirmir_2018	10.1038/s41564-017-0089-z	IBD	5459384	5459384	5	SRR5983434
P6009C12_MGX	CD	Schirmir_2018	10.1038/s41564-017-0089-z	IBD	16380351	16380351	11	SRR5983328
P6009C14_MGX	CD	Schirmir_2018	10.1038/s41564-017-0089-z	IBD	11018420	11018420	6	SRR5983319
P6009C18_MGX	CD	Schirmir_2018	10.1038/s41564-017-0089-z	IBD	5136229	5136229	4	SRR5983287
P6009C1_MGX	CD	Schirmir_2018	10.1038/s41564-017-0089-z	IBD	35896077	35896077	14	SRR5983452
P6009C20_MGX	CD	Schirmir_2018	10.1038/s41564-017-0089-z	IBD	5813693	5813693	3	SRR5983288
P6009C22_MGX	CD	Schirmir_2018	10.1038/s41564-017-0089-z	IBD	13617900	13617900	8	SRR5983410
P6009C24_MGX	CD	Schirmir_2018	10.1038/s41564-017-0089-z	IBD	14667278	14667278	5	SRR5983269
P6009C2_MGX	CD	Schirmir_2018	10.1038/s41564-017-0089-z	IBD	16647811	16647811	8	SRR5983362
P6009C3_MGX	CD	Schirmir_2018	10.1038/s41564-017-0089-z	IBD	17142836	17142836	16	SRR5983305
P6009C7_MGX	CD	Schirmir_2018	10.1038/s41564-017-0089-z	IBD	8764275	8764275	7	SRR5983401
P6009C8_MGX	CD	Schirmir_2018	10.1038/s41564-017-0089-z	IBD	13761538	13761538	8	SRR5983330
P6009C9_MGX	CD	Schirmir_2018	10.1038/s41564-017-0089-z	IBD	10973517	10973517	8	SRR5983398
P6010C1_MGX	CD	Schirmir_2018	10.1038/s41564-017-0089-z	IBD	9959413	9959413	5	SRR5983384
P6012C1_MGX	UC	Schirmir_2018	10.1038/s41564-017-0089-z	IBD	10136746	10136746	6	SRR5983370
P6013C1_MGX	UC	Schirmir_2018	10.1038/s41564-017-0089-z	IBD	7292946	7292946	3	SRR5983431
P6014C7_MGX	NONIBD	Schirmir_2018	10.1038/s41564-017-0089-z	NONIBD	7332455	7332455	5	SRR5983354
P6016C1_MGX	CD	Schirmir_2018	10.1038/s41564-017-0089-z	IBD	9128631	9128631	8	SRR5983405
P6017C1_MGX	NONIBD	Schirmir_2018	10.1038/s41564-017-0089-z	NONIBD	13677243	13677243	11	SRR5983329
P6018C2_MGX	NONIBD	Schirmir_2018	10.1038/s41564-017-0089-z	NONIBD	7443484	7443484	4	SRR5983349
P6024C5_MGX	CD	Schirmir_2018	10.1038/s41564-017-0089-z	IBD	5808102	5808102	1	SRR5983321
P6025C5_MGX	UC	Schirmir_2018	10.1038/s41564-017-0089-z	IBD	13406476	13406476	6	SRR5983318
P6028C1_MGX	CD	Schirmir_2018	10.1038/s41564-017-0089-z	IBD	12147221	12147221	7	SRR5983296
P6033C8_MGX	CD	Schirmir_2018	10.1038/s41564-017-0089-z	IBD	12417726	12417726	6	SRR5983271
IBDMDB_CD_CSM5MCVL	CD	Lloyd-Price_2019	10.1038/s41586-019-1237-9	IBD	10369332	10369332	5	SRR5947001
IBDMDB_CD_CSM5MCVN	CD	Lloyd-Price_2019	10.1038/s41586-019-1237-9	IBD	11143513	11143513	5	SRR5935841
IBDMDB_CD_CSM5MCW6	CD	Lloyd-Price_2019	10.1038/s41586-019-1237-9	IBD	8961711	8961711	3	SRR5936088
IBDMDB_CD_CSM5MCWC	CD	Lloyd-Price_2019	10.1038/s41586-019-1237-9	IBD	11772466	11772466	8	SRR5936186
IBDMDB_CD_CSM5MCWE	CD	Lloyd-Price_2019	10.1038/s41586-019-1237-9	IBD	12631177	12631177	10	SRR5935831
IBDMDB_CD_CSM5MCWG	CD	Lloyd-Price_2019	10.1038/s41586-019-1237-9	IBD	11266023	11266023	2	SRR5946662
IBDMDB_CD_CSM5MCXD	CD	Lloyd-Price_2019	10.1038/s41586-019-1237-9	IBD	10994311	10994311	7	SRR5935860
IBDMDB_CD_CSM5MCXT	CD	Lloyd-Price_2019	10.1038/s41586-019-1237-9	IBD	4288589	4288589	5	SRR5936179
IBDMDB_CD_CSM5MCXV	CD	Lloyd-Price_2019	10.1038/s41586-019-1237-9	IBD	10407782	10407782	8	SRR5946999
IBDMDB_CD_CSM5MCY2	CD	Lloyd-Price_2019	10.1038/s41586-019-1237-9	IBD	7786217	7786217	6	SRR5936163
IBDMDB_CD_CSM5MCYS	CD	Lloyd-Price_2019	10.1038/s41586-019-1237-9	IBD	12852457	12852457	11	SRR5946995
IBDMDB_CD_CSM5MCYW	CD	Lloyd-Price_2019	10.1038/s41586-019-1237-9	IBD	10284259	10284259	4	SRR5946984
IBDMDB_CD_CSM5MCZ3	CD	Lloyd-Price_2019	10.1038/s41586-019-1237-9	IBD	11595276	11595276	10	SRR5936239
IBDMDB_CD_CSM5MCZ5	CD	Lloyd-Price_2019	10.1038/s41586-019-1237-9	IBD	12845282	12845282	9	SRR5947046
IBDMDB_CD_CSM5MCZ7	CD	Lloyd-Price_2019	10.1038/s41586-019-1237-9	IBD	11349539	11349539	6	SRR5947058
IBDMDB_CD_CSM5MCZB	CD	Lloyd-Price_2019	10.1038/s41586-019-1237-9	IBD	13712759	13712759	7	SRR5935945
IBDMDB_CD_CSM5MCZD	CD	Lloyd-Price_2019	10.1038/s41586-019-1237-9	IBD	13188633	13188633	12	SRR5935946
IBDMDB_CD_CSM5MCZF	CD	Lloyd-Price_2019	10.1038/s41586-019-1237-9	IBD	9051427	9051427	8	SRR5936166
IBDMDB_CD_CSM67U9B	CD	Lloyd-Price_2019	10.1038/s41586-019-1237-9	IBD	9116408	9116408	9	SRR5946914
IBDMDB_CD_CSM67U9D	CD	Lloyd-Price_2019	10.1038/s41586-019-1237-9	IBD	10349346	10349346	12	SRR5935754
IBDMDB_CD_CSM67U9J	CD	Lloyd-Price_2019	10.1038/s41586-019-1237-9	IBD	9536262	9536262	5	SRR5946666
IBDMDB_CD_CSM67UA2	CD	Lloyd-Price_2019	10.1038/s41586-019-1237-9	IBD	10575967	10575967	5	SRR5935780
IBDMDB_CD_CSM67UAA	CD	Lloyd-Price_2019	10.1038/s41586-019-1237-9	IBD	7595911	7595911	7	SRR5935903
IBDMDB_CD_CSM67UAG	CD	Lloyd-Price_2019	10.1038/s41586-019-1237-9	IBD	7020111	7020111	8	SRR5946883
IBDMDB_CD_CSM67UAU	CD	Lloyd-Price_2019	10.1038/s41586-019-1237-9	IBD	16517521	16517521	14	SRR5935807
IBDMDB_CD_CSM67UAW	CD	Lloyd-Price_2019	10.1038/s41586-019-1237-9	IBD	5998278	5998278	6	SRR5935755
IBDMDB_CD_CSM67UAY	CD	Lloyd-Price_2019	10.1038/s41586-019-1237-9	IBD	7271774	7271774	7	SRR5936011
IBDMDB_CD_CSM67UB1	CD	Lloyd-Price_2019	10.1038/s41586-019-1237-9	IBD	11510361	11510361	10	SRR5946631
IBDMDB_CD_CSM67UB3	CD	Lloyd-Price_2019	10.1038/s41586-019-1237-9	IBD	7456986	7456986	9	SRR5936068
IBDMDB_CD_CSM67UB9	CD	Lloyd-Price_2019	10.1038/s41586-019-1237-9	IBD	13004680	13004680	6	SRR5962905
IBDMDB_CD_CSM67UBB	CD	Lloyd-Price_2019	10.1038/s41586-019-1237-9	IBD	11500242	11500242	6	SRR5946629
IBDMDB_CD_CSM67UBF	CD	Lloyd-Price_2019	10.1038/s41586-019-1237-9	IBD	8984022	8984022	5	SRR5946915
IBDMDB_CD_CSM67UBH	CD	Lloyd-Price_2019	10.1038/s41586-019-1237-9	IBD	14226766	14226766	8	SRR5935900
IBDMDB_CD_CSM67UBN	CD	Lloyd-Price_2019	10.1038/s41586-019-1237-9	IBD	9949625	9949625	7	SRR5935811
IBDMDB_CD_CSM67UBR	CD	Lloyd-Price_2019	10.1038/s41586-019-1237-9	IBD	6873650	6873650	5	SRR5947049
IBDMDB_CD_CSM67UCK	CD	Lloyd-Price_2019	10.1038/s41586-019-1237-9	IBD	7804044	7804044	8	SRR5936002
IBDMDB_CD_CSM67UGC	CD	Lloyd-Price_2019	10.1038/s41586-019-1237-9	IBD	2087938	2087938	2	SRR5946755
IBDMDB_CD_CSM67UGO	CD	Lloyd-Price_2019	10.1038/s41586-019-1237-9	IBD	4967286	4967286	5	SRR5936075
IBDMDB_CD_CSM79HG5	CD	Lloyd-Price_2019	10.1038/s41586-019-1237-9	IBD	15140441	15140441	6	SRR5946620
IBDMDB_CD_CSM79HGP	CD	Lloyd-Price_2019	10.1038/s41586-019-1237-9	IBD	15312283	15312283	8	SRR5935808
IBDMDB_CD_CSM79HH4	CD	Lloyd-Price_2019	10.1038/s41586-019-1237-9	IBD	9001005	9001005	8	SRR5947037
IBDMDB_CD_CSM79HH8	CD	Lloyd-Price_2019	10.1038/s41586-019-1237-9	IBD	8728495	8728495	11	SRR5946908
IBDMDB_CD_CSM79HHA	CD	Lloyd-Price_2019	10.1038/s41586-019-1237-9	IBD	10813388	10813388	9	SRR5946659
IBDMDB_CD_CSM79HHM	CD	Lloyd-Price_2019	10.1038/s41586-019-1237-9	IBD	15198324	15198324	16	SRR5946811
IBDMDB_CD_CSM79HHO	CD	Lloyd-Price_2019	10.1038/s41586-019-1237-9	IBD	8998650	8998650	17	SRR5946885
IBDMDB_CD_CSM79HHU	CD	Lloyd-Price_2019	10.1038/s41586-019-1237-9	IBD	10845745	10845745	12	SRR5946653
IBDMDB_CD_CSM79HHW	CD	Lloyd-Price_2019	10.1038/s41586-019-1237-9	IBD	8757271	8757271	4	SRR5962887
IBDMDB_CD_CSM79HI3	CD	Lloyd-Price_2019	10.1038/s41586-019-1237-9	IBD	15712334	15712334	9	SRR5936222
IBDMDB_CD_CSM79HI7	CD	Lloyd-Price_2019	10.1038/s41586-019-1237-9	IBD	11662411	11662411	6	SRR5935894
IBDMDB_CD_CSM79HIB	CD	Lloyd-Price_2019	10.1038/s41586-019-1237-9	IBD	13246669	13246669	10	SRR5935794
IBDMDB_CD_CSM79HIR	CD	Lloyd-Price_2019	10.1038/s41586-019-1237-9	IBD	11313276	11313276	12	SRR5936215
IBDMDB_CD_CSM79HIT	CD	Lloyd-Price_2019	10.1038/s41586-019-1237-9	IBD	5336055	5336055	9	SRR5936046
IBDMDB_CD_CSM79HIV	CD	Lloyd-Price_2019	10.1038/s41586-019-1237-9	IBD	10455530	10455530	13	SRR5935895
IBDMDB_CD_CSM79HIX	CD	Lloyd-Price_2019	10.1038/s41586-019-1237-9	IBD	14605519	14605519	7	SRR5936108
IBDMDB_CD_CSM79HIZ	CD	Lloyd-Price_2019	10.1038/s41586-019-1237-9	IBD	9933227	9933227	8	SRR5935786
IBDMDB_CD_CSM79HJA	CD	Lloyd-Price_2019	10.1038/s41586-019-1237-9	IBD	7992597	7992597	6	SRR5946871
IBDMDB_CD_CSM79HJM	CD	Lloyd-Price_2019	10.1038/s41586-019-1237-9	IBD	15067665	15067665	8	SRR5946750
IBDMDB_CD_CSM79HJO	CD	Lloyd-Price_2019	10.1038/s41586-019-1237-9	IBD	13437878	13437878	7	SRR5947089
IBDMDB_CD_CSM79HJQ	CD	Lloyd-Price_2019	10.1038/s41586-019-1237-9	IBD	348242	348242	0	SRR5946913
IBDMDB_CD_CSM79HJS	CD	Lloyd-Price_2019	10.1038/s41586-019-1237-9	IBD	10791009	10791009	5	SRR5946694
IBDMDB_CD_CSM79HJU	CD	Lloyd-Price_2019	10.1038/s41586-019-1237-9	IBD	13322047	13322047	5	SRR5946617
IBDMDB_CD_CSM79HJW	CD	Lloyd-Price_2019	10.1038/s41586-019-1237-9	IBD	16584188	16584188	7	SRR5936218
IBDMDB_CD_CSM79HJY	CD	Lloyd-Price_2019	10.1038/s41586-019-1237-9	IBD	9819795	9819795	7	SRR5946909
IBDMDB_CD_CSM79HK9	CD	Lloyd-Price_2019	10.1038/s41586-019-1237-9	IBD	10600563	10600563	7	SRR5947086
IBDMDB_CD_CSM79HKB	CD	Lloyd-Price_2019	10.1038/s41586-019-1237-9	IBD	8404338	8404338	8	SRR5935890
IBDMDB_CD_CSM79HKT	CD	Lloyd-Price_2019	10.1038/s41586-019-1237-9	IBD	12093997	12093997	6	SRR5935980
IBDMDB_CD_CSM79HKV	CD	Lloyd-Price_2019	10.1038/s41586-019-1237-9	IBD	14394355	14394355	7	SRR5946865
IBDMDB_CD_CSM79HKX	CD	Lloyd-Price_2019	10.1038/s41586-019-1237-9	IBD	22006293	22006293	9	SRR5946910
IBDMDB_CD_CSM79HKZ	CD	Lloyd-Price_2019	10.1038/s41586-019-1237-9	IBD	22942858	22942858	9	SRR5946691
IBDMDB_CD_CSM79HL4	CD	Lloyd-Price_2019	10.1038/s41586-019-1237-9	IBD	8410952	8410952	6	SRR5946606
IBDMDB_CD_CSM79HL6	CD	Lloyd-Price_2019	10.1038/s41586-019-1237-9	IBD	7542490	7542490	7	SRR5946944
IBDMDB_CD_CSM79HN2	CD	Lloyd-Price_2019	10.1038/s41586-019-1237-9	IBD	19054077	19054077	21	SRR5946692
IBDMDB_CD_CSM79HN6	CD	Lloyd-Price_2019	10.1038/s41586-019-1237-9	IBD	9242166	9242166	13	SRR5946941
IBDMDB_CD_CSM79HNO	CD	Lloyd-Price_2019	10.1038/s41586-019-1237-9	IBD	11356911	11356911	4	SRR5946940
IBDMDB_CD_CSM79HNU	CD	Lloyd-Price_2019	10.1038/s41586-019-1237-9	IBD	8307003	8307003	2	SRR5946826
IBDMDB_CD_CSM79HNW	CD	Lloyd-Price_2019	10.1038/s41586-019-1237-9	IBD	7302838	7302838	3	SRR5946853
IBDMDB_CD_CSM79HOF	CD	Lloyd-Price_2019	10.1038/s41586-019-1237-9	IBD	7725713	7725713	6	SRR5946794
IBDMDB_CD_CSM79HOH	CD	Lloyd-Price_2019	10.1038/s41586-019-1237-9	IBD	16700069	16700069	11	SRR5946814
IBDMDB_CD_CSM79HOJ	CD	Lloyd-Price_2019	10.1038/s41586-019-1237-9	IBD	16264244	16264244	12	SRR5946703
IBDMDB_CD_CSM79HOL	CD	Lloyd-Price_2019	10.1038/s41586-019-1237-9	IBD	15193025	15193025	17	SRR5936109
IBDMDB_CD_CSM79HOT	CD	Lloyd-Price_2019	10.1038/s41586-019-1237-9	IBD	10449758	10449758	9	SRR5946646
IBDMDB_CD_CSM79HPA	CD	Lloyd-Price_2019	10.1038/s41586-019-1237-9	IBD	8361159	8361159	10	SRR5946615
IBDMDB_CD_CSM79HPA_TR	CD	Lloyd-Price_2019	10.1038/s41586-019-1237-9	IBD	11506389	11506389	12	SRR5962899
IBDMDB_CD_CSM79HPC	CD	Lloyd-Price_2019	10.1038/s41586-019-1237-9	IBD	9268369	9268369	7	SRR5947074
IBDMDB_CD_CSM79HQ9	CD	Lloyd-Price_2019	10.1038/s41586-019-1237-9	IBD	20131014	20131014	5	SRR5946786
IBDMDB_CD_CSM79HQB	CD	Lloyd-Price_2019	10.1038/s41586-019-1237-9	IBD	9541619	9541619	11	SRR5946942
IBDMDB_CD_CSM79HQF	CD	Lloyd-Price_2019	10.1038/s41586-019-1237-9	IBD	10448160	10448160	4	SRR5936119
IBDMDB_CD_CSM79HQV	CD	Lloyd-Price_2019	10.1038/s41586-019-1237-9	IBD	20531722	20531722	4	SRR5946790
IBDMDB_CD_CSM79HQX	CD	Lloyd-Price_2019	10.1038/s41586-019-1237-9	IBD	12218625	12218625	4	SRR5946933
IBDMDB_CD_CSM79HQZ	CD	Lloyd-Price_2019	10.1038/s41586-019-1237-9	IBD	15191742	15191742	5	SRR5947010
IBDMDB_CD_CSM79HR2	CD	Lloyd-Price_2019	10.1038/s41586-019-1237-9	IBD	11672479	11672479	3	SRR5946648
IBDMDB_CD_CSM79HR4	CD	Lloyd-Price_2019	10.1038/s41586-019-1237-9	IBD	5619933	5619933	2	SRR5950610
IBDMDB_CD_CSM79HR6	CD	Lloyd-Price_2019	10.1038/s41586-019-1237-9	IBD	8992897	8992897	4	SRR5950716
IBDMDB_CD_CSM79HR8	CD	Lloyd-Price_2019	10.1038/s41586-019-1237-9	IBD	1504592	1504592	2	SRR5946700
IBDMDB_CD_CSM79HRC	CD	Lloyd-Price_2019	10.1038/s41586-019-1237-9	IBD	10201468	10201468	10	SRR5946784
IBDMDB_CD_CSM79HRE	CD	Lloyd-Price_2019	10.1038/s41586-019-1237-9	IBD	13620820	13620820	5	SRR5946778
IBDMDB_CD_CSM79HRG	CD	Lloyd-Price_2019	10.1038/s41586-019-1237-9	IBD	6963213	6963213	8	SRR5950737
IBDMDB_CD_CSM7KOJE	CD	Lloyd-Price_2019	10.1038/s41586-019-1237-9	IBD	9428810	9428810	9	SRR5946935
IBDMDB_CD_CSM7KOJG	CD	Lloyd-Price_2019	10.1038/s41586-019-1237-9	IBD	15211723	15211723	11	SRR5936207
IBDMDB_CD_CSM7KOJO	CD	Lloyd-Price_2019	10.1038/s41586-019-1237-9	IBD	11701869	11701869	10	SRR5936062
IBDMDB_CD_CSM7KOK3	CD	Lloyd-Price_2019	10.1038/s41586-019-1237-9	IBD	882263	882263	0	SRR5946819
IBDMDB_CD_CSM7KOK5	CD	Lloyd-Price_2019	10.1038/s41586-019-1237-9	IBD	2613357	2613357	2	SRR5936205
IBDMDB_CD_CSM7KOK7	CD	Lloyd-Price_2019	10.1038/s41586-019-1237-9	IBD	4612715	4612715	5	SRR5947014
IBDMDB_CD_CSM7KOKB	CD	Lloyd-Price_2019	10.1038/s41586-019-1237-9	IBD	4870431	4870431	4	SRR5950714
IBDMDB_CD_CSM7KOKD	CD	Lloyd-Price_2019	10.1038/s41586-019-1237-9	IBD	9131569	9131569	7	SRR5950676
IBDMDB_CD_CSM7KOKF	CD	Lloyd-Price_2019	10.1038/s41586-019-1237-9	IBD	17962693	17962693	9	SRR5946820
IBDMDB_CD_CSM7KOKJ	CD	Lloyd-Price_2019	10.1038/s41586-019-1237-9	IBD	10067434	10067434	6	SRR5947013
IBDMDB_CD_CSM7KOKN	CD	Lloyd-Price_2019	10.1038/s41586-019-1237-9	IBD	9733190	9733190	7	SRR5950725
IBDMDB_CD_CSM7KOKR	CD	Lloyd-Price_2019	10.1038/s41586-019-1237-9	IBD	9088704	9088704	7	SRR5946854
IBDMDB_CD_CSM7KOKT	CD	Lloyd-Price_2019	10.1038/s41586-019-1237-9	IBD	7171557	7171557	4	SRR5946801
IBDMDB_CD_CSM7KOKZ	CD	Lloyd-Price_2019	10.1038/s41586-019-1237-9	IBD	16751258	16751258	9	SRR5950635
IBDMDB_CD_CSM7KOL2	CD	Lloyd-Price_2019	10.1038/s41586-019-1237-9	IBD	15615990	15615990	8	SRR5950612
IBDMDB_CD_CSM7KOL4	CD	Lloyd-Price_2019	10.1038/s41586-019-1237-9	IBD	14439586	14439586	13	SRR5935869
IBDMDB_CD_CSM7KOLA	CD	Lloyd-Price_2019	10.1038/s41586-019-1237-9	IBD	13088487	13088487	9	SRR5935804
IBDMDB_CD_CSM7KOLE	CD	Lloyd-Price_2019	10.1038/s41586-019-1237-9	IBD	6353726	6353726	5	SRR5935967
IBDMDB_CD_CSM7KOLK	CD	Lloyd-Price_2019	10.1038/s41586-019-1237-9	IBD	9838215	9838215	14	SRR5950763
IBDMDB_CD_CSM7KOLM	CD	Lloyd-Price_2019	10.1038/s41586-019-1237-9	IBD	19439663	19439663	17	SRR5950680
IBDMDB_CD_CSM7KOMB	CD	Lloyd-Price_2019	10.1038/s41586-019-1237-9	IBD	9007112	9007112	6	SRR5950681
IBDMDB_CD_CSM7KOMH	CD	Lloyd-Price_2019	10.1038/s41586-019-1237-9	IBD	18340084	18340084	5	SRR5950526
IBDMDB_CD_CSM7KOMX	CD	Lloyd-Price_2019	10.1038/s41586-019-1237-9	IBD	10812606	10812606	6	SRR5950614
IBDMDB_CD_CSM7KOMZ	CD	Lloyd-Price_2019	10.1038/s41586-019-1237-9	IBD	6706088	6706088	6	SRR5950722
IBDMDB_CD_CSM7KON2	CD	Lloyd-Price_2019	10.1038/s41586-019-1237-9	IBD	7387232	7387232	7	SRR5935992
IBDMDB_CD_CSM7KON8	CD	Lloyd-Price_2019	10.1038/s41586-019-1237-9	IBD	9215024	9215024	7	SRR5935837
IBDMDB_CD_CSM7KONA	CD	Lloyd-Price_2019	10.1038/s41586-019-1237-9	IBD	2510520	2510520	1	SRR5950721
IBDMDB_CD_CSM7KONK	CD	Lloyd-Price_2019	10.1038/s41586-019-1237-9	IBD	12391015	12391015	4	SRR5950508
IBDMDB_CD_CSM7KOO5	CD	Lloyd-Price_2019	10.1038/s41586-019-1237-9	IBD	10527514	10527514	4	SRR5950636
IBDMDB_CD_CSM7KOO9	CD	Lloyd-Price_2019	10.1038/s41586-019-1237-9	IBD	9303143	9303143	7	SRR5950486
IBDMDB_CD_CSM7KOOD	CD	Lloyd-Price_2019	10.1038/s41586-019-1237-9	IBD	10344222	10344222	8	SRR5950527
IBDMDB_CD_CSM7KOOF	CD	Lloyd-Price_2019	10.1038/s41586-019-1237-9	IBD	8968716	8968716	6	SRR5950761
IBDMDB_CD_CSM7KOOT	CD	Lloyd-Price_2019	10.1038/s41586-019-1237-9	IBD	15165367	15165367	2	SRR5950640
IBDMDB_CD_CSM7KOOV	CD	Lloyd-Price_2019	10.1038/s41586-019-1237-9	IBD	5580971	5580971	3	SRR5950665
IBDMDB_CD_CSM7KOOX	CD	Lloyd-Price_2019	10.1038/s41586-019-1237-9	IBD	11180063	11180063	6	SRR5950501
IBDMDB_CD_CSM7KOOZ	CD	Lloyd-Price_2019	10.1038/s41586-019-1237-9	IBD	15307123	15307123	5	SRR5950488
IBDMDB_CD_CSM7KOP2	CD	Lloyd-Price_2019	10.1038/s41586-019-1237-9	IBD	13600795	13600795	3	SRR5950774
IBDMDB_CD_CSM7KOPS	CD	Lloyd-Price_2019	10.1038/s41586-019-1237-9	IBD	10048604	10048604	7	SRR5950674
IBDMDB_CD_CSM7KOPU	CD	Lloyd-Price_2019	10.1038/s41586-019-1237-9	IBD	8840560	8840560	4	SRR5950627
IBDMDB_CD_CSM7KOPW	CD	Lloyd-Price_2019	10.1038/s41586-019-1237-9	IBD	5614326	5614326	4	SRR5950485
IBDMDB_CD_CSM7KOQ1	CD	Lloyd-Price_2019	10.1038/s41586-019-1237-9	IBD	2215725	2215725	3	SRR5950766
IBDMDB_CD_CSM7KOQX	CD	Lloyd-Price_2019	10.1038/s41586-019-1237-9	IBD	9244776	9244776	6	SRR5950672
IBDMDB_CD_CSM7KOR2	CD	Lloyd-Price_2019	10.1038/s41586-019-1237-9	IBD	11638006	11638006	8	SRR5950790
IBDMDB_CD_CSM7KORC	CD	Lloyd-Price_2019	10.1038/s41586-019-1237-9	IBD	7157859	7157859	4	SRR5950734
IBDMDB_CD_CSM7KORG	CD	Lloyd-Price_2019	10.1038/s41586-019-1237-9	IBD	10538255	10538255	7	SRR5950750
IBDMDB_CD_CSM7KORI	CD	Lloyd-Price_2019	10.1038/s41586-019-1237-9	IBD	10155106	10155106	3	SRR5950691
IBDMDB_CD_CSM7KORK	CD	Lloyd-Price_2019	10.1038/s41586-019-1237-9	IBD	12100151	12100151	10	SRR5950600
IBDMDB_CD_CSM7KOSJ	CD	Lloyd-Price_2019	10.1038/s41586-019-1237-9	IBD	2855988	2855988	2	SRR5950493
IBDMDB_CD_CSM7KOSL	CD	Lloyd-Price_2019	10.1038/s41586-019-1237-9	IBD	3009137	3009137	3	SRR5950776
IBDMDB_CD_CSM7KOSP	CD	Lloyd-Price_2019	10.1038/s41586-019-1237-9	IBD	14188277	14188277	5	SRR5950565
IBDMDB_CD_CSM7KOST	CD	Lloyd-Price_2019	10.1038/s41586-019-1237-9	IBD	13179954	13179954	5	SRR5950728
IBDMDB_CD_CSM7KOSV	CD	Lloyd-Price_2019	10.1038/s41586-019-1237-9	IBD	11661037	11661037	16	SRR5950509
IBDMDB_CD_CSM7KOSX	CD	Lloyd-Price_2019	10.1038/s41586-019-1237-9	IBD	9542533	9542533	14	SRR5950775
IBDMDB_CD_CSM7KOTA	CD	Lloyd-Price_2019	10.1038/s41586-019-1237-9	IBD	13589431	13589431	5	SRR5950534
IBDMDB_CD_CSM7KOTC	CD	Lloyd-Price_2019	10.1038/s41586-019-1237-9	IBD	5992461	5992461	7	SRR5950564
IBDMDB_CD_CSM7KOTK	CD	Lloyd-Price_2019	10.1038/s41586-019-1237-9	IBD	8799328	8799328	10	SRR5950760
IBDMDB_CD_CSM7KOTO	CD	Lloyd-Price_2019	10.1038/s41586-019-1237-9	IBD	9490135	9490135	7	SRR5950533
IBDMDB_CD_CSM7KOTQ	CD	Lloyd-Price_2019	10.1038/s41586-019-1237-9	IBD	8505462	8505462	8	SRR5950604
IBDMDB_CD_CSM7KOTS	CD	Lloyd-Price_2019	10.1038/s41586-019-1237-9	IBD	5880342	5880342	7	SRR5950688
IBDMDB_CD_CSM7KOTU	CD	Lloyd-Price_2019	10.1038/s41586-019-1237-9	IBD	7137454	7137454	11	SRR5950754
IBDMDB_CD_CSM9X1YV	CD	Lloyd-Price_2019	10.1038/s41586-019-1237-9	IBD	12250434	12250434	11	SRR5950587
IBDMDB_CD_CSM9X1Z4	CD	Lloyd-Price_2019	10.1038/s41586-019-1237-9	IBD	10034450	10034450	8	SRR5950616
IBDMDB_CD_CSM9X1ZC	CD	Lloyd-Price_2019	10.1038/s41586-019-1237-9	IBD	6978866	6978866	6	SRR5950786
IBDMDB_CD_CSM9X21R	CD	Lloyd-Price_2019	10.1038/s41586-019-1237-9	IBD	14558333	14558333	7	SRR5950703
IBDMDB_CD_CSM9X21T	CD	Lloyd-Price_2019	10.1038/s41586-019-1237-9	IBD	7758269	7758269	7	SRR5950655
IBDMDB_CD_CSM9X222	CD	Lloyd-Price_2019	10.1038/s41586-019-1237-9	IBD	9912780	9912780	10	SRR5950516
IBDMDB_CD_CSM9X233	CD	Lloyd-Price_2019	10.1038/s41586-019-1237-9	IBD	9477143	9477143	10	SRR5950521
IBDMDB_CD_CSM9X235	CD	Lloyd-Price_2019	10.1038/s41586-019-1237-9	IBD	6886223	6886223	7	SRR5950595
IBDMDB_CD_CSM9X237	CD	Lloyd-Price_2019	10.1038/s41586-019-1237-9	IBD	8630285	8630285	11	SRR5950556
IBDMDB_CD_CSM9X23B	CD	Lloyd-Price_2019	10.1038/s41586-019-1237-9	IBD	11823907	11823907	10	SRR5950553
IBDMDB_CD_CSMA88CB	CD	Lloyd-Price_2019	10.1038/s41586-019-1237-9	IBD	5900493	5900493	5	SRR5950606
IBDMDB_CD_CSMA9J65	CD	Lloyd-Price_2019	10.1038/s41586-019-1237-9	IBD	5301430	5301430	6	SRR5950645
IBDMDB_CD_CSMACTZP	CD	Lloyd-Price_2019	10.1038/s41586-019-1237-9	IBD	12022114	12022114	10	SRR5950692
IBDMDB_CD_CSMAF72L	CD	Lloyd-Price_2019	10.1038/s41586-019-1237-9	IBD	13400421	13400421	5	SRR5950755
IBDMDB_CD_CSMAH393	CD	Lloyd-Price_2019	10.1038/s41586-019-1237-9	IBD	10543673	10543673	6	SRR5950502
IBDMDB_CD_CSMAIG7X	CD	Lloyd-Price_2019	10.1038/s41586-019-1237-9	IBD	7014200	7014200	2	SRR5950539
IBDMDB_CD_ESM5GEXY	CD	Lloyd-Price_2019	10.1038/s41586-019-1237-9	IBD	16253003	16253003	6	SRR5935911
IBDMDB_CD_ESM5MEB7	CD	Lloyd-Price_2019	10.1038/s41586-019-1237-9	IBD	13442121	13442121	7	SRR5935947
IBDMDB_CD_ESM5MEBE	CD	Lloyd-Price_2019	10.1038/s41586-019-1237-9	IBD	8531850	8531850	6	SRR5946998
IBDMDB_CD_ESM5MEBG	CD	Lloyd-Price_2019	10.1038/s41586-019-1237-9	IBD	12921139	12921139	6	SRR5935902
IBDMDB_CD_ESM5MEBI	CD	Lloyd-Price_2019	10.1038/s41586-019-1237-9	IBD	17775541	6777307	7	SRR5946882
IBDMDB_CD_ESM5MECL	CD	Lloyd-Price_2019	10.1038/s41586-019-1237-9	IBD	17620846	17620846	5	SRR5936070
IBDMDB_CD_ESM5MECQ	CD	Lloyd-Price_2019	10.1038/s41586-019-1237-9	IBD	11808839	11808839	9	SRR5947092
IBDMDB_CD_ESM5MED2	CD	Lloyd-Price_2019	10.1038/s41586-019-1237-9	IBD	17617042	17617042	9	SRR5936049
IBDMDB_CD_ESM5MEDD	CD	Lloyd-Price_2019	10.1038/s41586-019-1237-9	IBD	19627554	19627554	11	SRR5946919
IBDMDB_CD_ESM5MEDF	CD	Lloyd-Price_2019	10.1038/s41586-019-1237-9	IBD	9699302	9699302	10	SRR5935934
IBDMDB_CD_ESM5MEDK	CD	Lloyd-Price_2019	10.1038/s41586-019-1237-9	IBD	14729475	14729475	11	SRR5946667
IBDMDB_CD_ESM5MEDN	CD	Lloyd-Price_2019	10.1038/s41586-019-1237-9	IBD	4872550	4872550	5	SRR5936184
IBDMDB_CD_ESM718T7	CD	Lloyd-Price_2019	10.1038/s41586-019-1237-9	IBD	16706086	16706086	8	SRR5935886
IBDMDB_CD_ESM718T9	CD	Lloyd-Price_2019	10.1038/s41586-019-1237-9	IBD	10382092	10382092	6	SRR5946616
IBDMDB_CD_ESM718TF	CD	Lloyd-Price_2019	10.1038/s41586-019-1237-9	IBD	12245108	12245108	5	SRR5935896
IBDMDB_CD_ESM718TK	CD	Lloyd-Price_2019	10.1038/s41586-019-1237-9	IBD	14574411	14574411	5	SRR5936077
IBDMDB_CD_ESM718TM	CD	Lloyd-Price_2019	10.1038/s41586-019-1237-9	IBD	5298162	5298162	4	SRR5946812
IBDMDB_CD_ESM718UH	CD	Lloyd-Price_2019	10.1038/s41586-019-1237-9	IBD	8366760	8366760	7	SRR5946753
IBDMDB_CD_ESM718V4	CD	Lloyd-Price_2019	10.1038/s41586-019-1237-9	IBD	15653400	15653400	6	SRR5946757
IBDMDB_CD_ESM718V8	CD	Lloyd-Price_2019	10.1038/s41586-019-1237-9	IBD	16026342	16026342	9	SRR5935757
IBDMDB_CD_ESM7F5AK	CD	Lloyd-Price_2019	10.1038/s41586-019-1237-9	IBD	13067779	13067779	10	SRR5936050
IBDMDB_CD_ESM7F5AM	CD	Lloyd-Price_2019	10.1038/s41586-019-1237-9	IBD	13754419	11486519	12	SRR5946658
IBDMDB_CD_ESM7F5C5	CD	Lloyd-Price_2019	10.1038/s41586-019-1237-9	IBD	10456030	10456030	6	SRR5935867
IBDMDB_CD_ESM7F5C7	CD	Lloyd-Price_2019	10.1038/s41586-019-1237-9	IBD	12234243	12234243	9	SRR5946641
IBDMDB_CD_ESM7F5CB	CD	Lloyd-Price_2019	10.1038/s41586-019-1237-9	IBD	13008253	13008253	9	SRR5936203
IBDMDB_CD_ESM7F5CD	CD	Lloyd-Price_2019	10.1038/s41586-019-1237-9	IBD	13811785	13811785	12	SRR5946669
IBDMDB_CD_ESM7F5CF	CD	Lloyd-Price_2019	10.1038/s41586-019-1237-9	IBD	17077337	17077337	13	SRR5946798
IBDMDB_CD_ESM9IEP1	CD	Lloyd-Price_2019	10.1038/s41586-019-1237-9	IBD	7024839	7024839	5	SRR5950666
IBDMDB_CD_HSM5FZBZ	CD	Lloyd-Price_2019	10.1038/s41586-019-1237-9	IBD	5863735	5863735	4	SRR5946845
IBDMDB_CD_HSM5MD48	CD	Lloyd-Price_2019	10.1038/s41586-019-1237-9	IBD	10846556	10846556	5	SRR5935853
IBDMDB_CD_HSM5MD4N	CD	Lloyd-Price_2019	10.1038/s41586-019-1237-9	IBD	14219140	14219140	6	SRR5936235
IBDMDB_CD_HSM5MD4O	CD	Lloyd-Price_2019	10.1038/s41586-019-1237-9	IBD	13441870	13441870	6	SRR5946997
IBDMDB_CD_HSM5MD4Y	CD	Lloyd-Price_2019	10.1038/s41586-019-1237-9	IBD	7179096	7179096	6	SRR5947053
IBDMDB_CD_HSM5MD53	CD	Lloyd-Price_2019	10.1038/s41586-019-1237-9	IBD	8833688	8833688	8	SRR5947002
IBDMDB_CD_HSM5MD5P	CD	Lloyd-Price_2019	10.1038/s41586-019-1237-9	IBD	14715513	14715513	11	SRR5935918
IBDMDB_CD_HSM5MD62	CD	Lloyd-Price_2019	10.1038/s41586-019-1237-9	IBD	15170504	15170504	8	SRR5936183
IBDMDB_CD_HSM5MD66	CD	Lloyd-Price_2019	10.1038/s41586-019-1237-9	IBD	4707384	4707384	6	SRR5936089
IBDMDB_CD_HSM5MD6A	CD	Lloyd-Price_2019	10.1038/s41586-019-1237-9	IBD	7631250	7631250	9	SRR5935939
IBDMDB_CD_HSM5MD6A_TR	CD	Lloyd-Price_2019	10.1038/s41586-019-1237-9	IBD	11296484	11296484	9	SRR5962891
IBDMDB_CD_HSM5MD6C	CD	Lloyd-Price_2019	10.1038/s41586-019-1237-9	IBD	4404872	4404872	6	SRR5946922
IBDMDB_CD_HSM5MD6Y	CD	Lloyd-Price_2019	10.1038/s41586-019-1237-9	IBD	12422785	12422785	12	SRR5935834
IBDMDB_CD_HSM5MD71	CD	Lloyd-Price_2019	10.1038/s41586-019-1237-9	IBD	6631168	6631168	7	SRR5946665
IBDMDB_CD_HSM5MD73	CD	Lloyd-Price_2019	10.1038/s41586-019-1237-9	IBD	10988839	10988839	10	SRR5936220
IBDMDB_CD_HSM5MD75	CD	Lloyd-Price_2019	10.1038/s41586-019-1237-9	IBD	951427	951427	1	SRR5946917
IBDMDB_CD_HSM5MD79	CD	Lloyd-Price_2019	10.1038/s41586-019-1237-9	IBD	5366483	5366483	5	SRR5947099
IBDMDB_CD_HSM5MD7J	CD	Lloyd-Price_2019	10.1038/s41586-019-1237-9	IBD	7658864	7658864	2	SRR5946996
IBDMDB_CD_HSM5MD7K	CD	Lloyd-Price_2019	10.1038/s41586-019-1237-9	IBD	11689917	11689917	11	SRR5936086
IBDMDB_CD_HSM5MD7M	CD	Lloyd-Price_2019	10.1038/s41586-019-1237-9	IBD	772312	772312	1	SRR5947003
IBDMDB_CD_HSM5MD7O	CD	Lloyd-Price_2019	10.1038/s41586-019-1237-9	IBD	281471	281471	0	SRR5935941
IBDMDB_CD_HSM5MD7Q	CD	Lloyd-Price_2019	10.1038/s41586-019-1237-9	IBD	6146174	6146174	6	SRR5936223
IBDMDB_CD_HSM5MD7S	CD	Lloyd-Price_2019	10.1038/s41586-019-1237-9	IBD	8110609	8110609	7	SRR5935936
IBDMDB_CD_HSM5MD7U	CD	Lloyd-Price_2019	10.1038/s41586-019-1237-9	IBD	9284541	9284541	9	SRR5936017
IBDMDB_CD_HSM67VCZ	CD	Lloyd-Price_2019	10.1038/s41586-019-1237-9	IBD	10380424	10380424	5	SRR5935760
IBDMDB_CD_HSM67VD2	CD	Lloyd-Price_2019	10.1038/s41586-019-1237-9	IBD	11530528	9380001	8	SRR5936006
IBDMDB_CD_HSM67VD4	CD	Lloyd-Price_2019	10.1038/s41586-019-1237-9	IBD	11828405	11828405	5	SRR5936160
IBDMDB_CD_HSM67VD6	CD	Lloyd-Price_2019	10.1038/s41586-019-1237-9	IBD	10786481	10786481	9	SRR5936073
IBDMDB_CD_HSM67VDP	CD	Lloyd-Price_2019	10.1038/s41586-019-1237-9	IBD	8513674	8513674	3	SRR5947085
IBDMDB_CD_HSM67VDZ	CD	Lloyd-Price_2019	10.1038/s41586-019-1237-9	IBD	4527195	4527195	2	SRR5946758
IBDMDB_CD_HSM67VE4	CD	Lloyd-Price_2019	10.1038/s41586-019-1237-9	IBD	4717424	4717424	2	SRR5946624
IBDMDB_CD_HSM67VEC	CD	Lloyd-Price_2019	10.1038/s41586-019-1237-9	IBD	8257340	8257340	3	SRR5936004
IBDMDB_CD_HSM67VEE	CD	Lloyd-Price_2019	10.1038/s41586-019-1237-9	IBD	10402753	10402753	8	SRR5936155
IBDMDB_CD_HSM67VEG	CD	Lloyd-Price_2019	10.1038/s41586-019-1237-9	IBD	2389894	2389894	4	SRR5947047
IBDMDB_CD_HSM67VEI	CD	Lloyd-Price_2019	10.1038/s41586-019-1237-9	IBD	9641533	9641533	8	SRR5936210
IBDMDB_CD_HSM67VEK	CD	Lloyd-Price_2019	10.1038/s41586-019-1237-9	IBD	12798309	12798309	11	SRR5936230
IBDMDB_CD_HSM67VEM	CD	Lloyd-Price_2019	10.1038/s41586-019-1237-9	IBD	16740328	16740328	12	SRR5936125
IBDMDB_CD_HSM67VEM_TR	CD	Lloyd-Price_2019	10.1038/s41586-019-1237-9	IBD	10160793	10160793	10	SRR5962892
IBDMDB_CD_HSM67VF9	CD	Lloyd-Price_2019	10.1038/s41586-019-1237-9	IBD	15461598	15461598	3	SRR5936071
IBDMDB_CD_HSM67VFD	CD	Lloyd-Price_2019	10.1038/s41586-019-1237-9	IBD	12041079	12041079	2	SRR5936044
IBDMDB_CD_HSM67VFF	CD	Lloyd-Price_2019	10.1038/s41586-019-1237-9	IBD	8827220	8827220	5	SRR5947036
IBDMDB_CD_HSM67VFH	CD	Lloyd-Price_2019	10.1038/s41586-019-1237-9	IBD	6371487	6371487	4	SRR5946619
IBDMDB_CD_HSM67VFJ	CD	Lloyd-Price_2019	10.1038/s41586-019-1237-9	IBD	12246602	12246602	9	SRR5936129
IBDMDB_CD_HSM67VHB	CD	Lloyd-Price_2019	10.1038/s41586-019-1237-9	IBD	11571317	11571317	8	SRR5936029
IBDMDB_CD_HSM67VHD	CD	Lloyd-Price_2019	10.1038/s41586-019-1237-9	IBD	8361227	8361227	7	SRR5936232
IBDMDB_CD_HSM67VHF	CD	Lloyd-Price_2019	10.1038/s41586-019-1237-9	IBD	13537899	13537899	9	SRR5936120
IBDMDB_CD_HSM67VHH	CD	Lloyd-Price_2019	10.1038/s41586-019-1237-9	IBD	5323796	5323796	5	SRR5947042
IBDMDB_CD_HSM67VHJ	CD	Lloyd-Price_2019	10.1038/s41586-019-1237-9	IBD	18944741	18944741	8	SRR5936114
IBDMDB_CD_HSM67VHK	CD	Lloyd-Price_2019	10.1038/s41586-019-1237-9	IBD	1323900	1323900	3	SRR5947060
IBDMDB_CD_HSM67VHQ	CD	Lloyd-Price_2019	10.1038/s41586-019-1237-9	IBD	9768673	9768673	8	SRR5946878
IBDMDB_CD_HSM67VHS	CD	Lloyd-Price_2019	10.1038/s41586-019-1237-9	IBD	9559447	9559447	5	SRR5946877
IBDMDB_CD_HSM67VHW	CD	Lloyd-Price_2019	10.1038/s41586-019-1237-9	IBD	13074748	13074748	8	SRR5936227
IBDMDB_CD_HSM67VI1	CD	Lloyd-Price_2019	10.1038/s41586-019-1237-9	IBD	10319368	10319368	6	SRR5947043
IBDMDB_CD_HSM67VID	CD	Lloyd-Price_2019	10.1038/s41586-019-1237-9	IBD	5907098	5907098	4	SRR5946934
IBDMDB_CD_HSM67VIF	CD	Lloyd-Price_2019	10.1038/s41586-019-1237-9	IBD	7112630	7112630	7	SRR5946869
IBDMDB_CD_HSM67VIL	CD	Lloyd-Price_2019	10.1038/s41586-019-1237-9	IBD	12630465	12630465	6	SRR5935871
IBDMDB_CD_HSM6XRQB	CD	Lloyd-Price_2019	10.1038/s41586-019-1237-9	IBD	10414959	10414959	9	SRR5935765
IBDMDB_CD_HSM6XRQI	CD	Lloyd-Price_2019	10.1038/s41586-019-1237-9	IBD	2770485	2770485	2	SRR5935805
IBDMDB_CD_HSM6XRQK	CD	Lloyd-Price_2019	10.1038/s41586-019-1237-9	IBD	9584131	9584131	7	SRR5935906
IBDMDB_CD_HSM6XRQM	CD	Lloyd-Price_2019	10.1038/s41586-019-1237-9	IBD	14026872	14026872	8	SRR5935998
IBDMDB_CD_HSM6XRQO	CD	Lloyd-Price_2019	10.1038/s41586-019-1237-9	IBD	7454464	7454464	7	SRR5936154
IBDMDB_CD_HSM6XRR3	CD	Lloyd-Price_2019	10.1038/s41586-019-1237-9	IBD	12039523	12039523	5	SRR5947063
IBDMDB_CD_HSM6XRRV	CD	Lloyd-Price_2019	10.1038/s41586-019-1237-9	IBD	6583420	6583420	8	SRR5936003
IBDMDB_CD_HSM6XRS2	CD	Lloyd-Price_2019	10.1038/s41586-019-1237-9	IBD	3000648	3000648	3	SRR5946741
IBDMDB_CD_HSM6XRS4	CD	Lloyd-Price_2019	10.1038/s41586-019-1237-9	IBD	2425595	2425595	4	SRR5935905
IBDMDB_CD_HSM6XRS6	CD	Lloyd-Price_2019	10.1038/s41586-019-1237-9	IBD	3637717	3637717	4	SRR5947094
IBDMDB_CD_HSM6XRS8	CD	Lloyd-Price_2019	10.1038/s41586-019-1237-9	IBD	182479	182479	0	SRR5946761
IBDMDB_CD_HSM6XRSE	CD	Lloyd-Price_2019	10.1038/s41586-019-1237-9	IBD	2768319	2768319	3	SRR5946752
IBDMDB_CD_HSM6XRSG	CD	Lloyd-Price_2019	10.1038/s41586-019-1237-9	IBD	14079985	14079985	3	SRR5935752
IBDMDB_CD_HSM6XRSI	CD	Lloyd-Price_2019	10.1038/s41586-019-1237-9	IBD	11812996	11812996	3	SRR5935997
IBDMDB_CD_HSM6XRSN	CD	Lloyd-Price_2019	10.1038/s41586-019-1237-9	IBD	16578189	16578189	10	SRR5936045
IBDMDB_CD_HSM6XRST	CD	Lloyd-Price_2019	10.1038/s41586-019-1237-9	IBD	13618912	6968994	7	SRR5936001
IBDMDB_CD_HSM6XRUV	CD	Lloyd-Price_2019	10.1038/s41586-019-1237-9	IBD	16142779	16142779	8	SRR5946792
IBDMDB_CD_HSM6XRVM	CD	Lloyd-Price_2019	10.1038/s41586-019-1237-9	IBD	5404319	5404319	6	SRR5936226
IBDMDB_CD_HSM6XRVO	CD	Lloyd-Price_2019	10.1038/s41586-019-1237-9	IBD	5592535	5592535	4	SRR5936122
IBDMDB_CD_HSM6XRVU	CD	Lloyd-Price_2019	10.1038/s41586-019-1237-9	IBD	11650475	11650475	9	SRR5947005
IBDMDB_CD_HSM6XRVW	CD	Lloyd-Price_2019	10.1038/s41586-019-1237-9	IBD	12983771	12983771	11	SRR5935874
IBDMDB_CD_HSM7CYX2	CD	Lloyd-Price_2019	10.1038/s41586-019-1237-9	IBD	18007718	18007718	13	SRR5935897
IBDMDB_CD_HSM7CYX4	CD	Lloyd-Price_2019	10.1038/s41586-019-1237-9	IBD	13092113	13092113	13	SRR5936107
IBDMDB_CD_HSM7CYX6	CD	Lloyd-Price_2019	10.1038/s41586-019-1237-9	IBD	11519259	11519259	14	SRR5936134
IBDMDB_CD_HSM7CYX8	CD	Lloyd-Price_2019	10.1038/s41586-019-1237-9	IBD	11679096	11679096	13	SRR5935880
IBDMDB_CD_HSM7CYXA	CD	Lloyd-Price_2019	10.1038/s41586-019-1237-9	IBD	10774025	10774025	8	SRR5936209
IBDMDB_CD_HSM7CYXC	CD	Lloyd-Price_2019	10.1038/s41586-019-1237-9	IBD	8980773	8980773	9	SRR5935930
IBDMDB_CD_HSM7CYXQ	CD	Lloyd-Price_2019	10.1038/s41586-019-1237-9	IBD	7987618	7987618	6	SRR5946991
IBDMDB_CD_HSM7CYXS	CD	Lloyd-Price_2019	10.1038/s41586-019-1237-9	IBD	10528532	10528532	6	SRR5946789
IBDMDB_CD_HSM7CYY3	CD	Lloyd-Price_2019	10.1038/s41586-019-1237-9	IBD	9347515	9347515	8	SRR5946822
IBDMDB_CD_HSM7CYY5	CD	Lloyd-Price_2019	10.1038/s41586-019-1237-9	IBD	8121343	8121343	5	SRR5946849
IBDMDB_CD_HSM7CYY7	CD	Lloyd-Price_2019	10.1038/s41586-019-1237-9	IBD	14858071	14858071	11	SRR5936117
IBDMDB_CD_HSM7CYY9	CD	Lloyd-Price_2019	10.1038/s41586-019-1237-9	IBD	17541792	17541792	8	SRR5935990
IBDMDB_CD_HSM7CYYB	CD	Lloyd-Price_2019	10.1038/s41586-019-1237-9	IBD	6504131	6504131	2	SRR5936138
IBDMDB_CD_HSM7CYYD	CD	Lloyd-Price_2019	10.1038/s41586-019-1237-9	IBD	16476438	16476438	10	SRR5935802
IBDMDB_CD_HSM7CYZ5	CD	Lloyd-Price_2019	10.1038/s41586-019-1237-9	IBD	11582990	11582990	6	SRR5946912
IBDMDB_CD_HSM7CYZ7	CD	Lloyd-Price_2019	10.1038/s41586-019-1237-9	IBD	12236792	12236792	9	SRR5936124
IBDMDB_CD_HSM7CYZ9	CD	Lloyd-Price_2019	10.1038/s41586-019-1237-9	IBD	5327641	5327641	4	SRR5947040
IBDMDB_CD_HSM7CYZB	CD	Lloyd-Price_2019	10.1038/s41586-019-1237-9	IBD	3508814	3508814	4	SRR5946614
IBDMDB_CD_HSM7CYZD	CD	Lloyd-Price_2019	10.1038/s41586-019-1237-9	IBD	1890235	1890235	4	SRR5946816
IBDMDB_CD_HSM7CYZF	CD	Lloyd-Price_2019	10.1038/s41586-019-1237-9	IBD	2791235	2791235	5	SRR5946719
IBDMDB_CD_HSM7CYZT	CD	Lloyd-Price_2019	10.1038/s41586-019-1237-9	IBD	7231037	7231037	3	SRR5936048
IBDMDB_CD_HSM7CYZV	CD	Lloyd-Price_2019	10.1038/s41586-019-1237-9	IBD	14447327	14447327	3	SRR5935891
IBDMDB_CD_HSM7CZ14	CD	Lloyd-Price_2019	10.1038/s41586-019-1237-9	IBD	8821903	8821903	5	SRR5936208
IBDMDB_CD_HSM7CZ2Z	CD	Lloyd-Price_2019	10.1038/s41586-019-1237-9	IBD	6886704	6886704	8	SRR5936128
IBDMDB_CD_HSM7CZ32	CD	Lloyd-Price_2019	10.1038/s41586-019-1237-9	IBD	8372386	8372386	7	SRR5936200
IBDMDB_CD_HSM7CZ36	CD	Lloyd-Price_2019	10.1038/s41586-019-1237-9	IBD	11547185	11547185	10	SRR5936016
IBDMDB_CD_HSM7CZ38	CD	Lloyd-Price_2019	10.1038/s41586-019-1237-9	IBD	13914869	13914869	7	SRR5936188
IBDMDB_CD_HSM7CZ3A	CD	Lloyd-Price_2019	10.1038/s41586-019-1237-9	IBD	12741914	12741914	8	SRR5935882
IBDMDB_CD_HSM7CZ3C	CD	Lloyd-Price_2019	10.1038/s41586-019-1237-9	IBD	11217533	11217533	8	SRR5936206
IBDMDB_CD_HSM7CZ3E	CD	Lloyd-Price_2019	10.1038/s41586-019-1237-9	IBD	9371555	9371555	8	SRR5936121
IBDMDB_CD_HSM7CZ3G	CD	Lloyd-Price_2019	10.1038/s41586-019-1237-9	IBD	9025362	9025362	8	SRR5946783
IBDMDB_CD_HSM7J4GD	CD	Lloyd-Price_2019	10.1038/s41586-019-1237-9	IBD	13254341	13254341	6	SRR5936060
IBDMDB_CD_HSM7J4IC	CD	Lloyd-Price_2019	10.1038/s41586-019-1237-9	IBD	14004359	14004359	8	SRR5935838
IBDMDB_CD_HSM7J4IO	CD	Lloyd-Price_2019	10.1038/s41586-019-1237-9	IBD	8739460	8739460	8	SRR5935972
IBDMDB_CD_HSM7J4IP	CD	Lloyd-Price_2019	10.1038/s41586-019-1237-9	IBD	10592154	10592154	9	SRR5935949
IBDMDB_CD_HSM7J4IQ	CD	Lloyd-Price_2019	10.1038/s41586-019-1237-9	IBD	13391299	13391299	8	SRR5935842
IBDMDB_CD_HSM7J4IR	CD	Lloyd-Price_2019	10.1038/s41586-019-1237-9	IBD	12848337	12848337	12	SRR5936170
IBDMDB_CD_HSM7J4IS	CD	Lloyd-Price_2019	10.1038/s41586-019-1237-9	IBD	10139377	10139377	8	SRR5936090
IBDMDB_CD_HSM7J4J7	CD	Lloyd-Price_2019	10.1038/s41586-019-1237-9	IBD	12139923	12139923	7	SRR5935977
IBDMDB_CD_HSM7J4J9	CD	Lloyd-Price_2019	10.1038/s41586-019-1237-9	IBD	10370526	10370526	5	SRR5950793
IBDMDB_CD_HSM7J4JD	CD	Lloyd-Price_2019	10.1038/s41586-019-1237-9	IBD	12818331	12818331	4	SRR5935822
IBDMDB_CD_HSM7J4JF	CD	Lloyd-Price_2019	10.1038/s41586-019-1237-9	IBD	15231013	15231013	9	SRR5950566
IBDMDB_CD_HSM7J4JH	CD	Lloyd-Price_2019	10.1038/s41586-019-1237-9	IBD	5349332	5349332	5	SRR5935955
IBDMDB_CD_HSM7J4JJ	CD	Lloyd-Price_2019	10.1038/s41586-019-1237-9	IBD	13170020	13170020	11	SRR5936091
IBDMDB_CD_HSM7J4JN	CD	Lloyd-Price_2019	10.1038/s41586-019-1237-9	IBD	5737269	5737269	6	SRR5936102
IBDMDB_CD_HSM7J4JP	CD	Lloyd-Price_2019	10.1038/s41586-019-1237-9	IBD	9612965	9612965	6	SRR5950573
IBDMDB_CD_HSM7J4L5	CD	Lloyd-Price_2019	10.1038/s41586-019-1237-9	IBD	12435398	12435398	4	SRR5935953
IBDMDB_CD_HSM7J4L9	CD	Lloyd-Price_2019	10.1038/s41586-019-1237-9	IBD	11740425	11740425	8	SRR5935846
IBDMDB_CD_HSM7J4LP	CD	Lloyd-Price_2019	10.1038/s41586-019-1237-9	IBD	198946	198946	0	SRR5935743
IBDMDB_CD_HSM7J4MK	CD	Lloyd-Price_2019	10.1038/s41586-019-1237-9	IBD	10335283	10335283	7	SRR5935948
IBDMDB_CD_HSM7J4MS	CD	Lloyd-Price_2019	10.1038/s41586-019-1237-9	IBD	10439728	10439728	7	SRR5935819
IBDMDB_CD_HSM7J4MW	CD	Lloyd-Price_2019	10.1038/s41586-019-1237-9	IBD	10906025	10906025	6	SRR5950768
IBDMDB_CD_HSM7J4MY	CD	Lloyd-Price_2019	10.1038/s41586-019-1237-9	IBD	13447065	13447065	8	SRR5935910
IBDMDB_CD_HSM7J4N4	CD	Lloyd-Price_2019	10.1038/s41586-019-1237-9	IBD	9713077	9713077	8	SRR5936028
IBDMDB_CD_HSM7J4N6	CD	Lloyd-Price_2019	10.1038/s41586-019-1237-9	IBD	14301710	14301710	7	SRR5936145
IBDMDB_CD_HSM7J4N8	CD	Lloyd-Price_2019	10.1038/s41586-019-1237-9	IBD	14466723	14466723	7	SRR5950687
IBDMDB_CD_HSM7J4NA	CD	Lloyd-Price_2019	10.1038/s41586-019-1237-9	IBD	10319719	10319719	10	SRR5950731
IBDMDB_CD_HSM7J4OB	CD	Lloyd-Price_2019	10.1038/s41586-019-1237-9	IBD	13481518	13481518	10	SRR5950572
IBDMDB_CD_HSM7J4OE	CD	Lloyd-Price_2019	10.1038/s41586-019-1237-9	IBD	13975770	13975770	9	SRR5935928
IBDMDB_CD_HSM7J4OL	CD	Lloyd-Price_2019	10.1038/s41586-019-1237-9	IBD	22617797	22617797	7	SRR5950589
IBDMDB_CD_HSM7J4ON	CD	Lloyd-Price_2019	10.1038/s41586-019-1237-9	IBD	9939408	9939408	6	SRR5950567
IBDMDB_CD_HSM7J4OP	CD	Lloyd-Price_2019	10.1038/s41586-019-1237-9	IBD	7329987	7329987	5	SRR5935927
IBDMDB_CD_HSM7J4OT	CD	Lloyd-Price_2019	10.1038/s41586-019-1237-9	IBD	11351799	11351799	6	SRR5946863
IBDMDB_CD_HSM7J4OV	CD	Lloyd-Price_2019	10.1038/s41586-019-1237-9	IBD	7482542	7482542	3	SRR5950757
IBDMDB_CD_HSM7J4OX	CD	Lloyd-Price_2019	10.1038/s41586-019-1237-9	IBD	14016849	14016849	11	SRR5950590
IBDMDB_CD_HSM7J4OZ	CD	Lloyd-Price_2019	10.1038/s41586-019-1237-9	IBD	5697382	5697382	6	SRR5935779
IBDMDB_CD_HSM7J4P2	CD	Lloyd-Price_2019	10.1038/s41586-019-1237-9	IBD	18826478	18826478	9	SRR5950644
IBDMDB_CD_HSM7J4PA	CD	Lloyd-Price_2019	10.1038/s41586-019-1237-9	IBD	8466088	8466088	8	SRR5950677
IBDMDB_CD_HSM7J4PO	CD	Lloyd-Price_2019	10.1038/s41586-019-1237-9	IBD	11292639	11292639	15	SRR5935885
IBDMDB_CD_HSM7J4PQ	CD	Lloyd-Price_2019	10.1038/s41586-019-1237-9	IBD	13027329	13027329	9	SRR5935870
IBDMDB_CD_HSM7J4PS	CD	Lloyd-Price_2019	10.1038/s41586-019-1237-9	IBD	12356711	12356711	9	SRR5935873
IBDMDB_CD_HSM7J4PU	CD	Lloyd-Price_2019	10.1038/s41586-019-1237-9	IBD	5090775	5090775	6	SRR5950765
IBDMDB_CD_HSM7J4PW	CD	Lloyd-Price_2019	10.1038/s41586-019-1237-9	IBD	8786018	8786018	10	SRR5936054
IBDMDB_CD_HSM7J4PY	CD	Lloyd-Price_2019	10.1038/s41586-019-1237-9	IBD	10011608	10011608	7	SRR5936133
IBDMDB_CD_HSM7J4Q1	CD	Lloyd-Price_2019	10.1038/s41586-019-1237-9	IBD	14558955	14558955	12	SRR5946683
IBDMDB_CD_HSM7J4Q7	CD	Lloyd-Price_2019	10.1038/s41586-019-1237-9	IBD	11454067	11454067	8	SRR5950764
IBDMDB_CD_HSM7J4Q9	CD	Lloyd-Price_2019	10.1038/s41586-019-1237-9	IBD	14349145	14349145	10	SRR5950678
IBDMDB_CD_HSM7J4QB	CD	Lloyd-Price_2019	10.1038/s41586-019-1237-9	IBD	3866019	3866019	7	SRR5946994
IBDMDB_CD_HSM7J4QD	CD	Lloyd-Price_2019	10.1038/s41586-019-1237-9	IBD	701878	701878	1	SRR5946773
IBDMDB_CD_HSM7J4QF	CD	Lloyd-Price_2019	10.1038/s41586-019-1237-9	IBD	17001280	17001280	9	SRR5936196
IBDMDB_CD_HSM7J4QH	CD	Lloyd-Price_2019	10.1038/s41586-019-1237-9	IBD	3984132	3984132	7	SRR5950675
IBDMDB_CD_HSM7J4QL	CD	Lloyd-Price_2019	10.1038/s41586-019-1237-9	IBD	6742860	6742860	10	SRR5950625
IBDMDB_CD_HSM7J4QT	CD	Lloyd-Price_2019	10.1038/s41586-019-1237-9	IBD	3888651	3888651	6	SRR5935844
IBDMDB_CD_HSMA33IE	CD	Lloyd-Price_2019	10.1038/s41586-019-1237-9	IBD	8289752	8289752	8	SRR5946860
IBDMDB_CD_HSMA33IG	CD	Lloyd-Price_2019	10.1038/s41586-019-1237-9	IBD	10050599	10050599	10	SRR5950497
IBDMDB_CD_HSMA33IK	CD	Lloyd-Price_2019	10.1038/s41586-019-1237-9	IBD	9769730	9769730	8	SRR5946932
IBDMDB_CD_HSMA33JB	CD	Lloyd-Price_2019	10.1038/s41586-019-1237-9	IBD	18415520	18415520	12	SRR5946928
IBDMDB_CD_HSMA33JD	CD	Lloyd-Price_2019	10.1038/s41586-019-1237-9	IBD	10300513	10300513	7	SRR5946805
IBDMDB_CD_HSMA33JN	CD	Lloyd-Price_2019	10.1038/s41586-019-1237-9	IBD	14726861	14726861	11	SRR5950620
IBDMDB_CD_HSMA33JP	CD	Lloyd-Price_2019	10.1038/s41586-019-1237-9	IBD	18954213	18954213	11	SRR5950781
IBDMDB_CD_HSMA33JR	CD	Lloyd-Price_2019	10.1038/s41586-019-1237-9	IBD	12275283	12275283	9	SRR5946678
IBDMDB_CD_HSMA33JZ	CD	Lloyd-Price_2019	10.1038/s41586-019-1237-9	IBD	691166	691166	1	SRR5950622
IBDMDB_CD_HSMA33KE	CD	Lloyd-Price_2019	10.1038/s41586-019-1237-9	IBD	10428908	10428908	11	SRR5946807
IBDMDB_CD_HSMA33KM	CD	Lloyd-Price_2019	10.1038/s41586-019-1237-9	IBD	11963333	11963333	9	SRR5946841
IBDMDB_CD_HSMA33KO	CD	Lloyd-Price_2019	10.1038/s41586-019-1237-9	IBD	9339956	9339956	5	SRR5950749
IBDMDB_CD_HSMA33KQ	CD	Lloyd-Price_2019	10.1038/s41586-019-1237-9	IBD	6584608	6584608	6	SRR5950613
IBDMDB_CD_HSMA33KS	CD	Lloyd-Price_2019	10.1038/s41586-019-1237-9	IBD	12880087	12880087	16	SRR5950611
IBDMDB_CD_HSMA33KU	CD	Lloyd-Price_2019	10.1038/s41586-019-1237-9	IBD	11646953	11646953	11	SRR5946900
IBDMDB_CD_HSMA33L1	CD	Lloyd-Price_2019	10.1038/s41586-019-1237-9	IBD	9954439	9954439	8	SRR5946960
IBDMDB_CD_HSMA33LP	CD	Lloyd-Price_2019	10.1038/s41586-019-1237-9	IBD	15505013	15505013	11	SRR5950659
IBDMDB_CD_HSMA33MV	CD	Lloyd-Price_2019	10.1038/s41586-019-1237-9	IBD	13572336	13572336	8	SRR5950583
IBDMDB_CD_HSMA33NA	CD	Lloyd-Price_2019	10.1038/s41586-019-1237-9	IBD	12580156	12580156	5	SRR5936149
IBDMDB_CD_HSMA33NC	CD	Lloyd-Price_2019	10.1038/s41586-019-1237-9	IBD	12881570	12881570	10	SRR5946979
IBDMDB_CD_HSMA33NO	CD	Lloyd-Price_2019	10.1038/s41586-019-1237-9	IBD	13796207	13796207	6	SRR5946972
IBDMDB_CD_HSMA33NQ	CD	Lloyd-Price_2019	10.1038/s41586-019-1237-9	IBD	6586344	6586344	5	SRR5947076
IBDMDB_CD_HSMA33PL	CD	Lloyd-Price_2019	10.1038/s41586-019-1237-9	IBD	10195653	10195653	10	SRR5946721
IBDMDB_CD_HSMA33PN	CD	Lloyd-Price_2019	10.1038/s41586-019-1237-9	IBD	12059340	12059340	12	SRR5950537
IBDMDB_CD_HSMA33PX	CD	Lloyd-Price_2019	10.1038/s41586-019-1237-9	IBD	10874642	10874642	6	SRR5950535
IBDMDB_CD_HSMA33PZ	CD	Lloyd-Price_2019	10.1038/s41586-019-1237-9	IBD	16110590	16110590	5	SRR5946764
IBDMDB_CD_HSMA33Q6	CD	Lloyd-Price_2019	10.1038/s41586-019-1237-9	IBD	10887016	10887016	4	SRR5946886
IBDMDB_CD_HSMA33QY	CD	Lloyd-Price_2019	10.1038/s41586-019-1237-9	IBD	6475864	6475864	8	SRR5946767
IBDMDB_CD_HSMA33R1	CD	Lloyd-Price_2019	10.1038/s41586-019-1237-9	IBD	12823801	12823801	7	SRR5946839
IBDMDB_CD_HSMA33R5	CD	Lloyd-Price_2019	10.1038/s41586-019-1237-9	IBD	13854758	13854758	9	SRR5946827
IBDMDB_CD_HSMA33R7	CD	Lloyd-Price_2019	10.1038/s41586-019-1237-9	IBD	8347579	8347579	7	SRR5950557
IBDMDB_CD_HSMA33R9	CD	Lloyd-Price_2019	10.1038/s41586-019-1237-9	IBD	5476858	5476858	6	SRR5950552
IBDMDB_CD_HSMA33S4	CD	Lloyd-Price_2019	10.1038/s41586-019-1237-9	IBD	8798770	8798770	8	SRR5946840
IBDMDB_CD_MSM5LLDA	CD	Lloyd-Price_2019	10.1038/s41586-019-1237-9	IBD	8129966	8129966	6	SRR5935828
IBDMDB_CD_MSM5LLDC	CD	Lloyd-Price_2019	10.1038/s41586-019-1237-9	IBD	9731175	9731175	9	SRR5935854
IBDMDB_CD_MSM5LLDE	CD	Lloyd-Price_2019	10.1038/s41586-019-1237-9	IBD	3022376	3022376	3	SRR5936180
IBDMDB_CD_MSM5LLDI	CD	Lloyd-Price_2019	10.1038/s41586-019-1237-9	IBD	5507316	5507316	5	SRR5946771
IBDMDB_CD_MSM5LLDK	CD	Lloyd-Price_2019	10.1038/s41586-019-1237-9	IBD	6882486	6882486	7	SRR5946775
IBDMDB_CD_MSM5LLDM	CD	Lloyd-Price_2019	10.1038/s41586-019-1237-9	IBD	8786498	8786498	8	SRR5946770
IBDMDB_CD_MSM5LLDQ	CD	Lloyd-Price_2019	10.1038/s41586-019-1237-9	IBD	11201042	11201042	9	SRR5946768
IBDMDB_CD_MSM5LLDS	CD	Lloyd-Price_2019	10.1038/s41586-019-1237-9	IBD	5052958	5052958	4	SRR5935763
IBDMDB_CD_MSM5LLDU	CD	Lloyd-Price_2019	10.1038/s41586-019-1237-9	IBD	44531	44531	0	SRR5946769
IBDMDB_CD_MSM5LLEP	CD	Lloyd-Price_2019	10.1038/s41586-019-1237-9	IBD	15574307	15574307	14	SRR5935855
IBDMDB_CD_MSM5LLER	CD	Lloyd-Price_2019	10.1038/s41586-019-1237-9	IBD	13882944	13882944	9	SRR5935766
IBDMDB_CD_MSM5LLF4	CD	Lloyd-Price_2019	10.1038/s41586-019-1237-9	IBD	6157725	6157725	10	SRR5936079
IBDMDB_CD_MSM5LLF6	CD	Lloyd-Price_2019	10.1038/s41586-019-1237-9	IBD	14997669	14997669	12	SRR5947007
IBDMDB_CD_MSM5LLF8	CD	Lloyd-Price_2019	10.1038/s41586-019-1237-9	IBD	7702398	7702398	7	SRR5946664
IBDMDB_CD_MSM5LLGL	CD	Lloyd-Price_2019	10.1038/s41586-019-1237-9	IBD	17851202	17851202	12	SRR5935762
IBDMDB_CD_MSM5LLHC	CD	Lloyd-Price_2019	10.1038/s41586-019-1237-9	IBD	13858390	13858390	9	SRR5936181
IBDMDB_CD_MSM6J2IE	CD	Lloyd-Price_2019	10.1038/s41586-019-1237-9	IBD	10970145	10970145	8	SRR5935858
IBDMDB_CD_MSM6J2IG	CD	Lloyd-Price_2019	10.1038/s41586-019-1237-9	IBD	10328777	10328777	8	SRR5936087
IBDMDB_CD_MSM6J2II	CD	Lloyd-Price_2019	10.1038/s41586-019-1237-9	IBD	6663843	6663843	7	SRR5935917
IBDMDB_CD_MSM6J2IK	CD	Lloyd-Price_2019	10.1038/s41586-019-1237-9	IBD	12733432	12733432	10	SRR5935944
IBDMDB_CD_MSM6J2IM	CD	Lloyd-Price_2019	10.1038/s41586-019-1237-9	IBD	9061382	9061382	8	SRR5935790
IBDMDB_CD_MSM6J2IO	CD	Lloyd-Price_2019	10.1038/s41586-019-1237-9	IBD	12458601	12458601	10	SRR5935932
IBDMDB_CD_MSM6J2IQ	CD	Lloyd-Price_2019	10.1038/s41586-019-1237-9	IBD	15080092	15080092	8	SRR5935862
IBDMDB_CD_MSM6J2IY	CD	Lloyd-Price_2019	10.1038/s41586-019-1237-9	IBD	26742707	26742707	12	SRR5936221
IBDMDB_CD_MSM6J2J1	CD	Lloyd-Price_2019	10.1038/s41586-019-1237-9	IBD	12737284	12737284	9	SRR5935937
IBDMDB_CD_MSM6J2J3	CD	Lloyd-Price_2019	10.1038/s41586-019-1237-9	IBD	8748460	8748460	9	SRR5936177
IBDMDB_CD_MSM6J2J5	CD	Lloyd-Price_2019	10.1038/s41586-019-1237-9	IBD	10952596	10952596	12	SRR5935829
IBDMDB_CD_MSM6J2JB	CD	Lloyd-Price_2019	10.1038/s41586-019-1237-9	IBD	6070720	6070720	6	SRR5936225
IBDMDB_CD_MSM6J2JD	CD	Lloyd-Price_2019	10.1038/s41586-019-1237-9	IBD	11365454	11365454	8	SRR5936040
IBDMDB_CD_MSM6J2KC	CD	Lloyd-Price_2019	10.1038/s41586-019-1237-9	IBD	14538390	14538390	8	SRR5936085
IBDMDB_CD_MSM6J2KE	CD	Lloyd-Price_2019	10.1038/s41586-019-1237-9	IBD	10713637	10713637	7	SRR5935913
IBDMDB_CD_MSM6J2KM	CD	Lloyd-Price_2019	10.1038/s41586-019-1237-9	IBD	10603196	10603196	7	SRR5936236
IBDMDB_CD_MSM6J2LB	CD	Lloyd-Price_2019	10.1038/s41586-019-1237-9	IBD	2102584	2102584	3	SRR5936069
IBDMDB_CD_MSM6J2LH	CD	Lloyd-Price_2019	10.1038/s41586-019-1237-9	IBD	7353311	7353311	8	SRR5946973
IBDMDB_CD_MSM6J2LJ	CD	Lloyd-Price_2019	10.1038/s41586-019-1237-9	IBD	12969097	12969097	13	SRR5936038
IBDMDB_CD_MSM6J2LL	CD	Lloyd-Price_2019	10.1038/s41586-019-1237-9	IBD	11334482	11334482	15	SRR5935899
IBDMDB_CD_MSM6J2LN	CD	Lloyd-Price_2019	10.1038/s41586-019-1237-9	IBD	15932659	15932659	17	SRR5947095
IBDMDB_CD_MSM6J2LR	CD	Lloyd-Price_2019	10.1038/s41586-019-1237-9	IBD	9860716	9860716	11	SRR5947050
IBDMDB_CD_MSM6J2LT	CD	Lloyd-Price_2019	10.1038/s41586-019-1237-9	IBD	15813877	15813877	13	SRR5935756
IBDMDB_CD_MSM6J2MB	CD	Lloyd-Price_2019	10.1038/s41586-019-1237-9	IBD	11079504	11079504	13	SRR5936076
IBDMDB_CD_MSM6J2MD	CD	Lloyd-Price_2019	10.1038/s41586-019-1237-9	IBD	15804052	15804052	14	SRR5947090
IBDMDB_CD_MSM6J2MF	CD	Lloyd-Price_2019	10.1038/s41586-019-1237-9	IBD	13897673	13897673	13	SRR5946668
IBDMDB_CD_MSM6J2MH	CD	Lloyd-Price_2019	10.1038/s41586-019-1237-9	IBD	13802095	13802095	15	SRR5935888
IBDMDB_CD_MSM6J2MJ	CD	Lloyd-Price_2019	10.1038/s41586-019-1237-9	IBD	6725004	6725004	8	SRR5935832
IBDMDB_CD_MSM6J2ML	CD	Lloyd-Price_2019	10.1038/s41586-019-1237-9	IBD	10095100	10095100	10	SRR5946607
IBDMDB_CD_MSM6J2PK	CD	Lloyd-Price_2019	10.1038/s41586-019-1237-9	IBD	13458144	13458144	10	SRR5936036
IBDMDB_CD_MSM6J2PM	CD	Lloyd-Price_2019	10.1038/s41586-019-1237-9	IBD	16458569	16458569	15	SRR5936233
IBDMDB_CD_MSM6J2Q3	CD	Lloyd-Price_2019	10.1038/s41586-019-1237-9	IBD	9535138	9535138	7	SRR5935907
IBDMDB_CD_MSM6J2Q5	CD	Lloyd-Price_2019	10.1038/s41586-019-1237-9	IBD	13861595	13861595	10	SRR5946756
IBDMDB_CD_MSM6J2Q7	CD	Lloyd-Price_2019	10.1038/s41586-019-1237-9	IBD	14548018	14548018	8	SRR5946621
IBDMDB_CD_MSM6J2Q9	CD	Lloyd-Price_2019	10.1038/s41586-019-1237-9	IBD	11110954	11110954	8	SRR5947044
IBDMDB_CD_MSM6J2QB	CD	Lloyd-Price_2019	10.1038/s41586-019-1237-9	IBD	11829240	11829240	9	SRR5946742
IBDMDB_CD_MSM6J2QD	CD	Lloyd-Price_2019	10.1038/s41586-019-1237-9	IBD	10754725	10754725	9	SRR5935746
IBDMDB_CD_MSM6J2QR	CD	Lloyd-Price_2019	10.1038/s41586-019-1237-9	IBD	13835453	13835453	11	SRR5935753
IBDMDB_CD_MSM6J2R2	CD	Lloyd-Price_2019	10.1038/s41586-019-1237-9	IBD	14932092	14932092	8	SRR5935759
IBDMDB_CD_MSM6J2R8	CD	Lloyd-Price_2019	10.1038/s41586-019-1237-9	IBD	14067716	14067716	9	SRR5936072
IBDMDB_CD_MSM6J2RA	CD	Lloyd-Price_2019	10.1038/s41586-019-1237-9	IBD	12567345	12567345	10	SRR5936214
IBDMDB_CD_MSM6J2RC	CD	Lloyd-Price_2019	10.1038/s41586-019-1237-9	IBD	15873897	15873897	11	SRR5935986
IBDMDB_CD_MSM79H63	CD	Lloyd-Price_2019	10.1038/s41586-019-1237-9	IBD	13602918	13602918	7	SRR5946693
IBDMDB_CD_MSM79H65	CD	Lloyd-Price_2019	10.1038/s41586-019-1237-9	IBD	13219328	13219328	11	SRR5947039
IBDMDB_CD_MSM79H67	CD	Lloyd-Price_2019	10.1038/s41586-019-1237-9	IBD	6679030	6679030	4	SRR5946605
IBDMDB_CD_MSM79H69	CD	Lloyd-Price_2019	10.1038/s41586-019-1237-9	IBD	10819958	10819958	7	SRR5946945
IBDMDB_CD_MSM79H6B	CD	Lloyd-Price_2019	10.1038/s41586-019-1237-9	IBD	15199248	15199248	10	SRR5947015
IBDMDB_CD_MSM79H98	CD	Lloyd-Price_2019	10.1038/s41586-019-1237-9	IBD	16556563	16556563	10	SRR5950656
IBDMDB_CD_MSM79HBN	CD	Lloyd-Price_2019	10.1038/s41586-019-1237-9	IBD	7004481	7004481	5	SRR5946821
IBDMDB_CD_MSM79HBP	CD	Lloyd-Price_2019	10.1038/s41586-019-1237-9	IBD	5491584	5491584	6	SRR5946948
IBDMDB_CD_MSM79HBR	CD	Lloyd-Price_2019	10.1038/s41586-019-1237-9	IBD	11441567	11441567	2	SRR5946650
IBDMDB_CD_MSM79HBT	CD	Lloyd-Price_2019	10.1038/s41586-019-1237-9	IBD	6711441	6711441	7	SRR5946774
IBDMDB_CD_MSM79HBV	CD	Lloyd-Price_2019	10.1038/s41586-019-1237-9	IBD	6666138	6666138	6	SRR5946686
IBDMDB_CD_MSM79HDK	CD	Lloyd-Price_2019	10.1038/s41586-019-1237-9	IBD	10213234	10213234	9	SRR5946782
IBDMDB_CD_MSM79HDM	CD	Lloyd-Price_2019	10.1038/s41586-019-1237-9	IBD	6140595	6140595	7	SRR5936018
IBDMDB_CD_MSM79HDO	CD	Lloyd-Price_2019	10.1038/s41586-019-1237-9	IBD	3145546	3145546	4	SRR5950720
IBDMDB_CD_MSM79HDQ	CD	Lloyd-Price_2019	10.1038/s41586-019-1237-9	IBD	8939215	8939215	8	SRR5936063
IBDMDB_CD_MSM79HDQ_TR	CD	Lloyd-Price_2019	10.1038/s41586-019-1237-9	IBD	5077501	5077501	5	SRR5962901
IBDMDB_CD_MSM79HDS	CD	Lloyd-Price_2019	10.1038/s41586-019-1237-9	IBD	4911214	4911214	4	SRR5950668
IBDMDB_CD_MSM79HDU	CD	Lloyd-Price_2019	10.1038/s41586-019-1237-9	IBD	11012769	11012769	7	SRR5950633
IBDMDB_CD_MSM7J16J	CD	Lloyd-Price_2019	10.1038/s41586-019-1237-9	IBD	7922086	7922086	9	SRR5946965
IBDMDB_CD_MSM7J16L	CD	Lloyd-Price_2019	10.1038/s41586-019-1237-9	IBD	15128764	15128764	9	SRR5950492
IBDMDB_CD_MSM7J16N	CD	Lloyd-Price_2019	10.1038/s41586-019-1237-9	IBD	7813607	7813607	8	SRR5950544
IBDMDB_CD_MSM7J16P	CD	Lloyd-Price_2019	10.1038/s41586-019-1237-9	IBD	11246400	11246400	11	SRR5950577
IBDMDB_CD_MSM7J16R	CD	Lloyd-Price_2019	10.1038/s41586-019-1237-9	IBD	13366770	13366770	8	SRR5950575
IBDMDB_CD_MSM9VZEK	CD	Lloyd-Price_2019	10.1038/s41586-019-1237-9	IBD	4915644	4915644	3	SRR5935847
IBDMDB_CD_MSM9VZEK_TR	CD	Lloyd-Price_2019	10.1038/s41586-019-1237-9	IBD	3606560	3606560	4	SRR5962903
IBDMDB_CD_MSM9VZEM	CD	Lloyd-Price_2019	10.1038/s41586-019-1237-9	IBD	8861125	8861125	6	SRR5950773
IBDMDB_CD_MSM9VZEO	CD	Lloyd-Price_2019	10.1038/s41586-019-1237-9	IBD	11200891	11200891	6	SRR5950569
IBDMDB_CD_MSM9VZEQ	CD	Lloyd-Price_2019	10.1038/s41586-019-1237-9	IBD	12109183	12109183	5	SRR5950601
IBDMDB_CD_MSM9VZES	CD	Lloyd-Price_2019	10.1038/s41586-019-1237-9	IBD	7316834	7316834	10	SRR5936148
IBDMDB_CD_MSM9VZIY	CD	Lloyd-Price_2019	10.1038/s41586-019-1237-9	IBD	9043579	9043579	7	SRR5947023
IBDMDB_CD_MSM9VZJ3	CD	Lloyd-Price_2019	10.1038/s41586-019-1237-9	IBD	22800545	22800545	9	SRR5946902
IBDMDB_CD_MSM9VZJB	CD	Lloyd-Price_2019	10.1038/s41586-019-1237-9	IBD	9029640	9029640	8	SRR5947020
IBDMDB_CD_MSM9VZPH	CD	Lloyd-Price_2019	10.1038/s41586-019-1237-9	IBD	12501701	12501701	12	SRR5935845
IBDMDB_CD_MSM9VZPL	CD	Lloyd-Price_2019	10.1038/s41586-019-1237-9	IBD	14004882	14004882	11	SRR5946856
IBDMDB_CD_MSM9VZPN	CD	Lloyd-Price_2019	10.1038/s41586-019-1237-9	IBD	6656090	6656090	6	SRR5950548
IBDMDB_CD_MSMA26AL	CD	Lloyd-Price_2019	10.1038/s41586-019-1237-9	IBD	6884567	6884567	5	SRR5950698
IBDMDB_CD_MSMA26AN	CD	Lloyd-Price_2019	10.1038/s41586-019-1237-9	IBD	4158227	4158227	4	SRR5950653
IBDMDB_CD_MSMA26AP	CD	Lloyd-Price_2019	10.1038/s41586-019-1237-9	IBD	10119433	10119433	8	SRR5950782
IBDMDB_CD_MSMA26AR	CD	Lloyd-Price_2019	10.1038/s41586-019-1237-9	IBD	6853929	6853929	7	SRR5950778
IBDMDB_CD_MSMA26AT	CD	Lloyd-Price_2019	10.1038/s41586-019-1237-9	IBD	8696656	8696656	7	SRR5950541
IBDMDB_CD_MSMA26CV	CD	Lloyd-Price_2019	10.1038/s41586-019-1237-9	IBD	11410032	11410032	8	SRR5950787
IBDMDB_CD_MSMA26CX	CD	Lloyd-Price_2019	10.1038/s41586-019-1237-9	IBD	15639055	15639055	9	SRR5950739
IBDMDB_CD_MSMAPC6A	CD	Lloyd-Price_2019	10.1038/s41586-019-1237-9	IBD	8203164	8203164	7	SRR5946833
IBDMDB_CD_MSMAPC6C	CD	Lloyd-Price_2019	10.1038/s41586-019-1237-9	IBD	12895789	12895789	7	SRR5950596
IBDMDB_CD_MSMAPC6E	CD	Lloyd-Price_2019	10.1038/s41586-019-1237-9	IBD	14180675	14180675	8	SRR5950632
IBDMDB_CD_MSMAPC6G	CD	Lloyd-Price_2019	10.1038/s41586-019-1237-9	IBD	14441852	14441852	10	SRR5946887
IBDMDB_CD_MSMB4LXY	CD	Lloyd-Price_2019	10.1038/s41586-019-1237-9	IBD	16724957	16724957	22	SRR5946639
IBDMDB_CD_MSMB4LYB	CD	Lloyd-Price_2019	10.1038/s41586-019-1237-9	IBD	11465321	11465321	12	SRR5946706
IBDMDB_CD_PSM6XBQS	CD	Lloyd-Price_2019	10.1038/s41586-019-1237-9	IBD	11032744	11032744	6	SRR5947098
IBDMDB_CD_PSM6XBQU	CD	Lloyd-Price_2019	10.1038/s41586-019-1237-9	IBD	13524124	13524124	8	SRR5936007
IBDMDB_CD_PSM6XBQY	CD	Lloyd-Price_2019	10.1038/s41586-019-1237-9	IBD	1516776	1516776	1	SRR5935809
IBDMDB_CD_PSM6XBQY_TR	CD	Lloyd-Price_2019	10.1038/s41586-019-1237-9	IBD	4412169	4412169	4	SRR5962895
IBDMDB_CD_PSM6XBR1	CD	Lloyd-Price_2019	10.1038/s41586-019-1237-9	IBD	13549256	13549256	6	SRR5947051
IBDMDB_CD_PSM6XBRK	CD	Lloyd-Price_2019	10.1038/s41586-019-1237-9	IBD	10485476	10485476	9	SRR5935960
IBDMDB_CD_PSM6XBRK_TR	CD	Lloyd-Price_2019	10.1038/s41586-019-1237-9	IBD	6909304	6909304	8	SRR5962890
IBDMDB_CD_PSM6XBS4	CD	Lloyd-Price_2019	10.1038/s41586-019-1237-9	IBD	14094138	14094138	12	SRR5935964
IBDMDB_CD_PSM6XBS8	CD	Lloyd-Price_2019	10.1038/s41586-019-1237-9	IBD	11533043	11533043	8	SRR5946745
IBDMDB_CD_PSM6XBSA	CD	Lloyd-Price_2019	10.1038/s41586-019-1237-9	IBD	11682408	11682408	9	SRR5946744
IBDMDB_CD_PSM6XBSI	CD	Lloyd-Price_2019	10.1038/s41586-019-1237-9	IBD	10563929	10563929	6	SRR5936074
IBDMDB_CD_PSM6XBSK	CD	Lloyd-Price_2019	10.1038/s41586-019-1237-9	IBD	11743254	11743254	7	SRR5946698
IBDMDB_CD_PSM6XBSM	CD	Lloyd-Price_2019	10.1038/s41586-019-1237-9	IBD	8473347	8473347	9	SRR5950713
IBDMDB_CD_PSM6XBSO	CD	Lloyd-Price_2019	10.1038/s41586-019-1237-9	IBD	2374644	2374644	2	SRR5936032
IBDMDB_CD_PSM6XBSS	CD	Lloyd-Price_2019	10.1038/s41586-019-1237-9	IBD	17608443	17608443	13	SRR5946695
IBDMDB_CD_PSM6XBSU	CD	Lloyd-Price_2019	10.1038/s41586-019-1237-9	IBD	12266581	12266581	7	SRR5936106
IBDMDB_CD_PSM6XBT1	CD	Lloyd-Price_2019	10.1038/s41586-019-1237-9	IBD	5016131	5016131	8	SRR5946949
IBDMDB_CD_PSM6XBTL	CD	Lloyd-Price_2019	10.1038/s41586-019-1237-9	IBD	17283607	17283607	11	SRR5946795
IBDMDB_CD_PSM6XBTP	CD	Lloyd-Price_2019	10.1038/s41586-019-1237-9	IBD	13900971	13900971	8	SRR5936066
IBDMDB_CD_PSM6XBUG	CD	Lloyd-Price_2019	10.1038/s41586-019-1237-9	IBD	9747778	9747778	7	SRR5935879
IBDMDB_CD_PSM6XBUI	CD	Lloyd-Price_2019	10.1038/s41586-019-1237-9	IBD	1464820	1464820	1	SRR5936202
IBDMDB_CD_PSM6XBUK	CD	Lloyd-Price_2019	10.1038/s41586-019-1237-9	IBD	14925361	14925361	11	SRR5936023
IBDMDB_CD_PSM6XBUM	CD	Lloyd-Price_2019	10.1038/s41586-019-1237-9	IBD	13455340	13455340	11	SRR5946642
IBDMDB_CD_PSM6XBUO	CD	Lloyd-Price_2019	10.1038/s41586-019-1237-9	IBD	12630104	12630104	9	SRR5950639
IBDMDB_CD_PSM6XBUQ	CD	Lloyd-Price_2019	10.1038/s41586-019-1237-9	IBD	18137085	18137085	11	SRR5935803
IBDMDB_CD_PSM6XBV2	CD	Lloyd-Price_2019	10.1038/s41586-019-1237-9	IBD	5903128	5903128	7	SRR5935982
IBDMDB_CD_PSM6XBV4	CD	Lloyd-Price_2019	10.1038/s41586-019-1237-9	IBD	9975845	9975845	3	SRR5935791
IBDMDB_CD_PSM7J12J	CD	Lloyd-Price_2019	10.1038/s41586-019-1237-9	IBD	8265083	8265083	3	SRR5936100
IBDMDB_CD_PSM7J12R	CD	Lloyd-Price_2019	10.1038/s41586-019-1237-9	IBD	13119731	13119731	4	SRR5936146
IBDMDB_CD_PSM7J136	CD	Lloyd-Price_2019	10.1038/s41586-019-1237-9	IBD	12551362	12551362	6	SRR5936172
IBDMDB_CD_PSM7J13E	CD	Lloyd-Price_2019	10.1038/s41586-019-1237-9	IBD	8604567	8604567	10	SRR5935824
IBDMDB_CD_PSM7J13I	CD	Lloyd-Price_2019	10.1038/s41586-019-1237-9	IBD	11021507	11021507	8	SRR5947030
IBDMDB_CD_PSM7J13K	CD	Lloyd-Price_2019	10.1038/s41586-019-1237-9	IBD	7682762	7682762	6	SRR5947033
IBDMDB_CD_PSM7J13M	CD	Lloyd-Price_2019	10.1038/s41586-019-1237-9	IBD	13615734	13615734	8	SRR5936151
IBDMDB_CD_PSM7J13Q	CD	Lloyd-Price_2019	10.1038/s41586-019-1237-9	IBD	9012082	7010833	7	SRR5950607
IBDMDB_CD_PSM7J13Y	CD	Lloyd-Price_2019	10.1038/s41586-019-1237-9	IBD	12764929	12764929	9	SRR5962884
IBDMDB_CD_PSM7J141	CD	Lloyd-Price_2019	10.1038/s41586-019-1237-9	IBD	20465562	20465562	9	SRR5935823
IBDMDB_CD_PSM7J14L	CD	Lloyd-Price_2019	10.1038/s41586-019-1237-9	IBD	9878088	9878088	8	SRR5935920
IBDMDB_CD_PSM7J14N	CD	Lloyd-Price_2019	10.1038/s41586-019-1237-9	IBD	12121205	12121205	8	SRR5935878
IBDMDB_CD_PSM7J14P	CD	Lloyd-Price_2019	10.1038/s41586-019-1237-9	IBD	12964437	12964437	9	SRR5946859
IBDMDB_CD_PSM7J14R	CD	Lloyd-Price_2019	10.1038/s41586-019-1237-9	IBD	18603219	18603219	13	SRR5947078
IBDMDB_CD_PSM7J14T	CD	Lloyd-Price_2019	10.1038/s41586-019-1237-9	IBD	7731196	7731196	7	SRR5947087
IBDMDB_CD_PSM7J158	CD	Lloyd-Price_2019	10.1038/s41586-019-1237-9	IBD	10883956	10883956	7	SRR5947034
IBDMDB_CD_PSM7J15A	CD	Lloyd-Price_2019	10.1038/s41586-019-1237-9	IBD	10384755	10384755	10	SRR5935922
IBDMDB_CD_PSM7J15G	CD	Lloyd-Price_2019	10.1038/s41586-019-1237-9	IBD	11763085	11763085	8	SRR5950496
IBDMDB_CD_PSM7J15I	CD	Lloyd-Price_2019	10.1038/s41586-019-1237-9	IBD	7830229	7830229	9	SRR5950586
IBDMDB_CD_PSM7J15W	CD	Lloyd-Price_2019	10.1038/s41586-019-1237-9	IBD	7069582	7069582	5	SRR5935921
IBDMDB_CD_PSM7J161	CD	Lloyd-Price_2019	10.1038/s41586-019-1237-9	IBD	14967016	14967016	11	SRR5946864
IBDMDB_CD_PSM7J163	CD	Lloyd-Price_2019	10.1038/s41586-019-1237-9	IBD	9555703	9555703	4	SRR5947079
IBDMDB_CD_PSM7J177	CD	Lloyd-Price_2019	10.1038/s41586-019-1237-9	IBD	133425	133425	0	SRR5936187
IBDMDB_CD_PSM7J179	CD	Lloyd-Price_2019	10.1038/s41586-019-1237-9	IBD	1285648	1285648	1	SRR5936055
IBDMDB_CD_PSM7J17B	CD	Lloyd-Price_2019	10.1038/s41586-019-1237-9	IBD	1892107	1892107	2	SRR5936136
IBDMDB_CD_PSM7J17D	CD	Lloyd-Price_2019	10.1038/s41586-019-1237-9	IBD	975538	975538	1	SRR5950631
IBDMDB_CD_PSM7J17F	CD	Lloyd-Price_2019	10.1038/s41586-019-1237-9	IBD	925505	925505	1	SRR5936096
IBDMDB_CD_PSM7J17L	CD	Lloyd-Price_2019	10.1038/s41586-019-1237-9	IBD	15314699	15314699	11	SRR5936015
IBDMDB_CD_PSM7J17T	CD	Lloyd-Price_2019	10.1038/s41586-019-1237-9	IBD	8726430	8726430	10	SRR5950525
IBDMDB_CD_PSM7J18E	CD	Lloyd-Price_2019	10.1038/s41586-019-1237-9	IBD	15085207	15085207	8	SRR5935744
IBDMDB_CD_PSM7J18G	CD	Lloyd-Price_2019	10.1038/s41586-019-1237-9	IBD	13837095	13837095	8	SRR5935952
IBDMDB_CD_PSM7J18I	CD	Lloyd-Price_2019	10.1038/s41586-019-1237-9	IBD	13734932	13734932	12	SRR5936101
IBDMDB_CD_PSM7J18K	CD	Lloyd-Price_2019	10.1038/s41586-019-1237-9	IBD	12272507	12272507	4	SRR5935861
IBDMDB_CD_PSM7J18M	CD	Lloyd-Price_2019	10.1038/s41586-019-1237-9	IBD	9143541	9143541	5	SRR5936147
IBDMDB_CD_PSM7J199	CD	Lloyd-Price_2019	10.1038/s41586-019-1237-9	IBD	26880564	26880564	8	SRR5936131
IBDMDB_CD_PSM7J19B	CD	Lloyd-Price_2019	10.1038/s41586-019-1237-9	IBD	18869879	18869879	10	SRR5935877
IBDMDB_CD_PSM7J19F	CD	Lloyd-Price_2019	10.1038/s41586-019-1237-9	IBD	2279675	2279675	3	SRR5936116
IBDMDB_CD_PSM7J19H	CD	Lloyd-Price_2019	10.1038/s41586-019-1237-9	IBD	2409074	2409074	3	SRR5946781
IBDMDB_CD_PSM7J19J	CD	Lloyd-Price_2019	10.1038/s41586-019-1237-9	IBD	14248904	14248904	10	SRR5935806
IBDMDB_CD_PSM7J1BJ	CD	Lloyd-Price_2019	10.1038/s41586-019-1237-9	IBD	1930749	1930749	3	SRR5947008
IBDMDB_CD_PSM7J1BL	CD	Lloyd-Price_2019	10.1038/s41586-019-1237-9	IBD	1916047	1916047	2	SRR5946797
IBDMDB_CD_PSM7J1BP	CD	Lloyd-Price_2019	10.1038/s41586-019-1237-9	IBD	2492593	2492593	4	SRR5950682
IBDMDB_CD_PSM7J1BR	CD	Lloyd-Price_2019	10.1038/s41586-019-1237-9	IBD	2508505	2508505	4	SRR5936139
IBDMDB_CD_PSM7J1C8	CD	Lloyd-Price_2019	10.1038/s41586-019-1237-9	IBD	16698386	16698386	9	SRR5946699
IBDMDB_CD_PSM7J1CC	CD	Lloyd-Price_2019	10.1038/s41586-019-1237-9	IBD	13726503	13726503	11	SRR5936193
IBDMDB_CD_PSM7J1CG	CD	Lloyd-Price_2019	10.1038/s41586-019-1237-9	IBD	15414018	15414018	8	SRR5950667
IBDMDB_CD_PSM7J1CI	CD	Lloyd-Price_2019	10.1038/s41586-019-1237-9	IBD	15198640	15198640	10	SRR5935957
IBDMDB_CD_PSM7J1CU	CD	Lloyd-Price_2019	10.1038/s41586-019-1237-9	IBD	12047041	12047041	8	SRR5936164
IBDMDB_CD_PSM7J4EF	CD	Lloyd-Price_2019	10.1038/s41586-019-1237-9	IBD	1203876	1203876	1	SRR5946734
IBDMDB_CD_PSMA263M	CD	Lloyd-Price_2019	10.1038/s41586-019-1237-9	IBD	14864759	14864759	7	SRR5950730
IBDMDB_CD_PSMA263S	CD	Lloyd-Price_2019	10.1038/s41586-019-1237-9	IBD	10393873	10393873	6	SRR5950578
IBDMDB_CD_PSMA263U	CD	Lloyd-Price_2019	10.1038/s41586-019-1237-9	IBD	10233226	10233226	5	SRR5950579
IBDMDB_CD_PSMA263W	CD	Lloyd-Price_2019	10.1038/s41586-019-1237-9	IBD	8112138	8112138	5	SRR5946673
IBDMDB_CD_PSMA2653	CD	Lloyd-Price_2019	10.1038/s41586-019-1237-9	IBD	9355689	9355689	7	SRR5950546
IBDMDB_CD_PSMA2659	CD	Lloyd-Price_2019	10.1038/s41586-019-1237-9	IBD	13979166	13979166	9	SRR5946842
IBDMDB_CD_PSMA265B	CD	Lloyd-Price_2019	10.1038/s41586-019-1237-9	IBD	7937692	7937692	5	SRR5946901
IBDMDB_CD_PSMA265N	CD	Lloyd-Price_2019	10.1038/s41586-019-1237-9	IBD	5782319	5782319	5	SRR5946926
IBDMDB_CD_PSMA265T	CD	Lloyd-Price_2019	10.1038/s41586-019-1237-9	IBD	12761717	12761717	10	SRR5946897
IBDMDB_CD_PSMA2668	CD	Lloyd-Price_2019	10.1038/s41586-019-1237-9	IBD	11966081	11966081	7	SRR5946677
IBDMDB_CD_PSMA266I	CD	Lloyd-Price_2019	10.1038/s41586-019-1237-9	IBD	10913966	10913966	8	SRR5946813
IBDMDB_CD_PSMA266M	CD	Lloyd-Price_2019	10.1038/s41586-019-1237-9	IBD	15762646	15762646	14	SRR5946899
IBDMDB_CD_PSMA266O	CD	Lloyd-Price_2019	10.1038/s41586-019-1237-9	IBD	10335152	10335152	8	SRR5950661
IBDMDB_CD_PSMA266Q	CD	Lloyd-Price_2019	10.1038/s41586-019-1237-9	IBD	6623679	6623679	4	SRR5946957
IBDMDB_CD_PSMA267D	CD	Lloyd-Price_2019	10.1038/s41586-019-1237-9	IBD	3550960	3518560	6	SRR5950540
IBDMDB_CD_PSMA267F	CD	Lloyd-Price_2019	10.1038/s41586-019-1237-9	IBD	14900072	14900072	7	SRR5950517
IBDMDB_CD_PSMA267H	CD	Lloyd-Price_2019	10.1038/s41586-019-1237-9	IBD	11399806	11399806	5	SRR5946766
IBDMDB_CD_PSMA269G	CD	Lloyd-Price_2019	10.1038/s41586-019-1237-9	IBD	8368818	8368818	6	SRR5946727
IBDMDB_CD_PSMA269O	CD	Lloyd-Price_2019	10.1038/s41586-019-1237-9	IBD	19566529	19566529	8	SRR5946893
IBDMDB_CD_PSMB4MBS	CD	Lloyd-Price_2019	10.1038/s41586-019-1237-9	IBD	11395410	11395410	7	SRR5946634
IBDMDB_nonIBD_CSM67UH7	NONIBD	Lloyd-Price_2019	10.1038/s41586-019-1237-9	NONIBD	12132964	12132964	10	SRR5946762
IBDMDB_nonIBD_CSM79HGX	NONIBD	Lloyd-Price_2019	10.1038/s41586-019-1237-9	NONIBD	6670049	6670049	7	SRR5946740
IBDMDB_nonIBD_CSM79HGZ	NONIBD	Lloyd-Price_2019	10.1038/s41586-019-1237-9	NONIBD	9245369	9245369	10	SRR5946660
IBDMDB_nonIBD_CSM79HOV	NONIBD	Lloyd-Price_2019	10.1038/s41586-019-1237-9	NONIBD	6357624	6357624	6	SRR5946868
IBDMDB_nonIBD_CSM79HOX	NONIBD	Lloyd-Price_2019	10.1038/s41586-019-1237-9	NONIBD	15863041	15863041	13	SRR5946989
IBDMDB_nonIBD_CSM79HOZ	NONIBD	Lloyd-Price_2019	10.1038/s41586-019-1237-9	NONIBD	12101583	12101583	15	SRR5946946
IBDMDB_nonIBD_CSM79HP2	NONIBD	Lloyd-Price_2019	10.1038/s41586-019-1237-9	NONIBD	24080150	24080150	14	SRR5946993
IBDMDB_nonIBD_CSM79HP4	NONIBD	Lloyd-Price_2019	10.1038/s41586-019-1237-9	NONIBD	7811145	7811145	7	SRR5946645
IBDMDB_nonIBD_CSM79HP6	NONIBD	Lloyd-Price_2019	10.1038/s41586-019-1237-9	NONIBD	8928282	8928282	13	SRR5946780
IBDMDB_nonIBD_CSM7KOOH	NONIBD	Lloyd-Price_2019	10.1038/s41586-019-1237-9	NONIBD	8348342	8348342	14	SRR5950642
IBDMDB_nonIBD_CSM7KOOJ	NONIBD	Lloyd-Price_2019	10.1038/s41586-019-1237-9	NONIBD	15574011	15574011	17	SRR5950673
IBDMDB_nonIBD_CSM7KOOL	NONIBD	Lloyd-Price_2019	10.1038/s41586-019-1237-9	NONIBD	7390289	7390289	12	SRR5950507
IBDMDB_nonIBD_CSM7KOON	NONIBD	Lloyd-Price_2019	10.1038/s41586-019-1237-9	NONIBD	11940850	11940850	13	SRR5950791
IBDMDB_nonIBD_CSM7KOOP	NONIBD	Lloyd-Price_2019	10.1038/s41586-019-1237-9	NONIBD	12393085	12393085	13	SRR5950503
IBDMDB_nonIBD_CSMA8M9R	NONIBD	Lloyd-Price_2019	10.1038/s41586-019-1237-9	NONIBD	20760263	20760263	18	SRR5950605
IBDMDB_nonIBD_CSMAAEUA	NONIBD	Lloyd-Price_2019	10.1038/s41586-019-1237-9	NONIBD	12486525	12486525	11	SRR5950648
IBDMDB_nonIBD_CSMAE44D	NONIBD	Lloyd-Price_2019	10.1038/s41586-019-1237-9	NONIBD	13801150	13801150	14	SRR5950752
IBDMDB_nonIBD_CSMAG78W	NONIBD	Lloyd-Price_2019	10.1038/s41586-019-1237-9	NONIBD	10513750	10513750	10	SRR5950490
IBDMDB_nonIBD_CSMAHYLR	NONIBD	Lloyd-Price_2019	10.1038/s41586-019-1237-9	NONIBD	9006887	9006887	9	SRR5950543
IBDMDB_nonIBD_HSM5MD5B	NONIBD	Lloyd-Price_2019	10.1038/s41586-019-1237-9	NONIBD	15517338	15517338	15	SRR5935768
IBDMDB_nonIBD_HSM5MD5D	NONIBD	Lloyd-Price_2019	10.1038/s41586-019-1237-9	NONIBD	10547199	10547199	12	SRR5935966
IBDMDB_nonIBD_HSM5MD6I	NONIBD	Lloyd-Price_2019	10.1038/s41586-019-1237-9	NONIBD	15941533	15941533	8	SRR5935770
IBDMDB_nonIBD_HSM5MD6K	NONIBD	Lloyd-Price_2019	10.1038/s41586-019-1237-9	NONIBD	11498976	11498976	9	SRR5935764
IBDMDB_nonIBD_HSM5MD6M	NONIBD	Lloyd-Price_2019	10.1038/s41586-019-1237-9	NONIBD	6155304	6155304	6	SRR5946974
IBDMDB_nonIBD_HSM5MD6Q	NONIBD	Lloyd-Price_2019	10.1038/s41586-019-1237-9	NONIBD	6635482	6635482	7	SRR5946920
IBDMDB_nonIBD_HSM5MD6W	NONIBD	Lloyd-Price_2019	10.1038/s41586-019-1237-9	NONIBD	11805696	11805696	5	SRR5936010
IBDMDB_nonIBD_HSM67VDT	NONIBD	Lloyd-Price_2019	10.1038/s41586-019-1237-9	NONIBD	14931310	14931310	8	SRR5962882
IBDMDB_nonIBD_HSM67VEO	NONIBD	Lloyd-Price_2019	10.1038/s41586-019-1237-9	NONIBD	12524246	12524246	9	SRR5936014
IBDMDB_nonIBD_HSM67VEQ	NONIBD	Lloyd-Price_2019	10.1038/s41586-019-1237-9	NONIBD	8739157	8739157	9	SRR5946625
IBDMDB_nonIBD_HSM67VES	NONIBD	Lloyd-Price_2019	10.1038/s41586-019-1237-9	NONIBD	16291596	16291596	12	SRR5935813
IBDMDB_nonIBD_HSM67VEU	NONIBD	Lloyd-Price_2019	10.1038/s41586-019-1237-9	NONIBD	14050002	14050002	10	SRR5936037
IBDMDB_nonIBD_HSM67VEW	NONIBD	Lloyd-Price_2019	10.1038/s41586-019-1237-9	NONIBD	7057652	7057652	9	SRR5946746
IBDMDB_nonIBD_HSM67VF3	NONIBD	Lloyd-Price_2019	10.1038/s41586-019-1237-9	NONIBD	16652399	16652399	7	SRR5936041
IBDMDB_nonIBD_HSM67VFR	NONIBD	Lloyd-Price_2019	10.1038/s41586-019-1237-9	NONIBD	11533722	11533722	5	SRR5936228
IBDMDB_nonIBD_HSM67VFX	NONIBD	Lloyd-Price_2019	10.1038/s41586-019-1237-9	NONIBD	9586364	9586364	10	SRR5935965
IBDMDB_nonIBD_HSM67VFZ	NONIBD	Lloyd-Price_2019	10.1038/s41586-019-1237-9	NONIBD	14701835	14701835	13	SRR5936031
IBDMDB_nonIBD_HSM67VG8	NONIBD	Lloyd-Price_2019	10.1038/s41586-019-1237-9	NONIBD	18210166	18210166	11	SRR5936104
IBDMDB_nonIBD_HSM67VGA	NONIBD	Lloyd-Price_2019	10.1038/s41586-019-1237-9	NONIBD	6147553	6147553	7	SRR5935958
IBDMDB_nonIBD_HSM67VGC	NONIBD	Lloyd-Price_2019	10.1038/s41586-019-1237-9	NONIBD	10589718	10589718	9	SRR5936213
IBDMDB_nonIBD_HSM67VGG	NONIBD	Lloyd-Price_2019	10.1038/s41586-019-1237-9	NONIBD	11280452	11280452	10	SRR5935893
IBDMDB_nonIBD_HSM67VGK	NONIBD	Lloyd-Price_2019	10.1038/s41586-019-1237-9	NONIBD	10895013	10895013	8	SRR5935788
IBDMDB_nonIBD_HSM67VGK_TR	NONIBD	Lloyd-Price_2019	10.1038/s41586-019-1237-9	NONIBD	11936730	11936730	8	SRR5962896
IBDMDB_nonIBD_HSM67VI3	NONIBD	Lloyd-Price_2019	10.1038/s41586-019-1237-9	NONIBD	12574365	12574365	8	SRR5936159
IBDMDB_nonIBD_HSM67VI5	NONIBD	Lloyd-Price_2019	10.1038/s41586-019-1237-9	NONIBD	14508328	14508328	11	SRR5947045
IBDMDB_nonIBD_HSM67VI7	NONIBD	Lloyd-Price_2019	10.1038/s41586-019-1237-9	NONIBD	11085250	11085250	7	SRR5946748
IBDMDB_nonIBD_HSM67VI9	NONIBD	Lloyd-Price_2019	10.1038/s41586-019-1237-9	NONIBD	19469251	19469251	9	SRR5936212
IBDMDB_nonIBD_HSM67VIB	NONIBD	Lloyd-Price_2019	10.1038/s41586-019-1237-9	NONIBD	15412912	15412912	8	SRR5936126
IBDMDB_nonIBD_HSM6XRQ8	NONIBD	Lloyd-Price_2019	10.1038/s41586-019-1237-9	NONIBD	14496047	14496047	7	SRR5936229
IBDMDB_nonIBD_HSM6XRQS	NONIBD	Lloyd-Price_2019	10.1038/s41586-019-1237-9	NONIBD	9961576	9961576	4	SRR5946916
IBDMDB_nonIBD_HSM6XRQU	NONIBD	Lloyd-Price_2019	10.1038/s41586-019-1237-9	NONIBD	13090682	13090682	6	SRR5935901
IBDMDB_nonIBD_HSM6XRQW	NONIBD	Lloyd-Price_2019	10.1038/s41586-019-1237-9	NONIBD	10804195	10804195	5	SRR5936008
IBDMDB_nonIBD_HSM6XRQY	NONIBD	Lloyd-Price_2019	10.1038/s41586-019-1237-9	NONIBD	8444310	8444310	4	SRR5946622
IBDMDB_nonIBD_HSM6XRRJ	NONIBD	Lloyd-Price_2019	10.1038/s41586-019-1237-9	NONIBD	15902720	15902720	5	SRR5936000
IBDMDB_nonIBD_HSM6XRSX	NONIBD	Lloyd-Price_2019	10.1038/s41586-019-1237-9	NONIBD	11202061	11202061	15	SRR5935769
IBDMDB_nonIBD_HSM6XRT8	NONIBD	Lloyd-Price_2019	10.1038/s41586-019-1237-9	NONIBD	9678465	9678465	9	SRR5935915
IBDMDB_nonIBD_HSM6XRTG	NONIBD	Lloyd-Price_2019	10.1038/s41586-019-1237-9	NONIBD	11777553	11777553	5	SRR5962883
IBDMDB_nonIBD_HSM6XRUL	NONIBD	Lloyd-Price_2019	10.1038/s41586-019-1237-9	NONIBD	12058377	12058377	9	SRR5936156
IBDMDB_nonIBD_HSM6XRUN	NONIBD	Lloyd-Price_2019	10.1038/s41586-019-1237-9	NONIBD	11754630	11754630	9	SRR5935816
IBDMDB_nonIBD_HSM6XRUR	NONIBD	Lloyd-Price_2019	10.1038/s41586-019-1237-9	NONIBD	14793123	14793123	3	SRR5936033
IBDMDB_nonIBD_HSM6XRVA	NONIBD	Lloyd-Price_2019	10.1038/s41586-019-1237-9	NONIBD	9636833	9636833	5	SRR5946954
IBDMDB_nonIBD_HSM6XRVC	NONIBD	Lloyd-Price_2019	10.1038/s41586-019-1237-9	NONIBD	16991729	16991729	8	SRR5936043
IBDMDB_nonIBD_HSM6XRVC_TR	NONIBD	Lloyd-Price_2019	10.1038/s41586-019-1237-9	NONIBD	12913712	12913712	7	SRR5962893
IBDMDB_nonIBD_HSM6XRVK	NONIBD	Lloyd-Price_2019	10.1038/s41586-019-1237-9	NONIBD	8960012	8960012	7	SRR5936130
IBDMDB_nonIBD_HSM7CYXE	NONIBD	Lloyd-Price_2019	10.1038/s41586-019-1237-9	NONIBD	10992786	10992786	5	SRR5946874
IBDMDB_nonIBD_HSM7CYXG	NONIBD	Lloyd-Price_2019	10.1038/s41586-019-1237-9	NONIBD	9564523	9564523	5	SRR5946988
IBDMDB_nonIBD_HSM7CYXI	NONIBD	Lloyd-Price_2019	10.1038/s41586-019-1237-9	NONIBD	2374010	2374010	2	SRR5936141
IBDMDB_nonIBD_HSM7CYXO	NONIBD	Lloyd-Price_2019	10.1038/s41586-019-1237-9	NONIBD	12554874	12554874	6	SRR5947101
IBDMDB_nonIBD_HSM7CYYF	NONIBD	Lloyd-Price_2019	10.1038/s41586-019-1237-9	NONIBD	11699300	11699300	5	SRR5946611
IBDMDB_nonIBD_HSM7CYYH	NONIBD	Lloyd-Price_2019	10.1038/s41586-019-1237-9	NONIBD	14819693	14819693	9	SRR5936127
IBDMDB_nonIBD_HSM7CYYP	NONIBD	Lloyd-Price_2019	10.1038/s41586-019-1237-9	NONIBD	7050118	7050118	4	SRR5950719
IBDMDB_nonIBD_HSM7CYZJ	NONIBD	Lloyd-Price_2019	10.1038/s41586-019-1237-9	NONIBD	10467406	10467406	12	SRR5935889
IBDMDB_nonIBD_HSM7CYZL	NONIBD	Lloyd-Price_2019	10.1038/s41586-019-1237-9	NONIBD	9629356	9629356	11	SRR5947052
IBDMDB_nonIBD_HSM7CYZR	NONIBD	Lloyd-Price_2019	10.1038/s41586-019-1237-9	NONIBD	13648327	13648327	14	SRR5946730
IBDMDB_nonIBD_HSM7CZ16	NONIBD	Lloyd-Price_2019	10.1038/s41586-019-1237-9	NONIBD	6240861	6240861	4	SRR5946696
IBDMDB_nonIBD_HSM7CZ18	NONIBD	Lloyd-Price_2019	10.1038/s41586-019-1237-9	NONIBD	5473538	5473538	5	SRR5946870
IBDMDB_nonIBD_HSM7CZ1A	NONIBD	Lloyd-Price_2019	10.1038/s41586-019-1237-9	NONIBD	19274344	19274344	12	SRR5935798
IBDMDB_nonIBD_HSM7CZ1C	NONIBD	Lloyd-Price_2019	10.1038/s41586-019-1237-9	NONIBD	16929859	16929859	17	SRR5946815
IBDMDB_nonIBD_HSM7CZ1E	NONIBD	Lloyd-Price_2019	10.1038/s41586-019-1237-9	NONIBD	13507370	13507370	4	SRR5946729
IBDMDB_nonIBD_HSM7CZ1G	NONIBD	Lloyd-Price_2019	10.1038/s41586-019-1237-9	NONIBD	9581531	9581531	6	SRR5946992
IBDMDB_nonIBD_HSM7CZ24	NONIBD	Lloyd-Price_2019	10.1038/s41586-019-1237-9	NONIBD	9325092	9325092	7	SRR5947041
IBDMDB_nonIBD_HSM7CZ26	NONIBD	Lloyd-Price_2019	10.1038/s41586-019-1237-9	NONIBD	12447677	12447677	10	SRR5946612
IBDMDB_nonIBD_HSM7CZ28	NONIBD	Lloyd-Price_2019	10.1038/s41586-019-1237-9	NONIBD	12767491	12767491	9	SRR5946609
IBDMDB_nonIBD_HSM7CZ2A	NONIBD	Lloyd-Price_2019	10.1038/s41586-019-1237-9	NONIBD	9095171	9095171	7	SRR5946947
IBDMDB_nonIBD_HSM7CZ2E	NONIBD	Lloyd-Price_2019	10.1038/s41586-019-1237-9	NONIBD	11204534	11204534	10	SRR5946644
IBDMDB_nonIBD_HSM7CZ2H	NONIBD	Lloyd-Price_2019	10.1038/s41586-019-1237-9	NONIBD	6187660	6187660	6	SRR5946937
IBDMDB_nonIBD_HSM7J4G1	NONIBD	Lloyd-Price_2019	10.1038/s41586-019-1237-9	NONIBD	8070583	8070583	7	SRR5935797
IBDMDB_nonIBD_HSM7J4G8	NONIBD	Lloyd-Price_2019	10.1038/s41586-019-1237-9	NONIBD	9372530	9372530	11	SRR5946689
IBDMDB_nonIBD_HSM7J4HA	NONIBD	Lloyd-Price_2019	10.1038/s41586-019-1237-9	NONIBD	7838296	7838296	6	SRR5946779
IBDMDB_nonIBD_HSM7J4HC	NONIBD	Lloyd-Price_2019	10.1038/s41586-019-1237-9	NONIBD	13818729	13818729	9	SRR5936025
IBDMDB_nonIBD_HSM7J4HE	NONIBD	Lloyd-Price_2019	10.1038/s41586-019-1237-9	NONIBD	12878300	12878300	6	SRR5950715
IBDMDB_nonIBD_HSM7J4HG	NONIBD	Lloyd-Price_2019	10.1038/s41586-019-1237-9	NONIBD	6175673	6175673	7	SRR5950634
IBDMDB_nonIBD_HSM7J4HI	NONIBD	Lloyd-Price_2019	10.1038/s41586-019-1237-9	NONIBD	13814272	13814272	9	SRR5950628
IBDMDB_nonIBD_HSM7J4HK	NONIBD	Lloyd-Price_2019	10.1038/s41586-019-1237-9	NONIBD	9010881	9010881	9	SRR5950487
IBDMDB_nonIBD_HSM7J4HW	NONIBD	Lloyd-Price_2019	10.1038/s41586-019-1237-9	NONIBD	11336299	11336299	9	SRR5950740
IBDMDB_nonIBD_HSM7J4HY	NONIBD	Lloyd-Price_2019	10.1038/s41586-019-1237-9	NONIBD	14986102	14986102	7	SRR5950718
IBDMDB_nonIBD_HSM7J4I3	NONIBD	Lloyd-Price_2019	10.1038/s41586-019-1237-9	NONIBD	14060087	9579234	6	SRR5936192
IBDMDB_nonIBD_HSM7J4I5	NONIBD	Lloyd-Price_2019	10.1038/s41586-019-1237-9	NONIBD	10073800	10073800	9	SRR5935745
IBDMDB_nonIBD_HSM7J4I7	NONIBD	Lloyd-Price_2019	10.1038/s41586-019-1237-9	NONIBD	9606611	9606611	10	SRR5950500
IBDMDB_nonIBD_HSM7J4I9	NONIBD	Lloyd-Price_2019	10.1038/s41586-019-1237-9	NONIBD	8246392	8246392	11	SRR5950592
IBDMDB_nonIBD_HSM7J4IU	NONIBD	Lloyd-Price_2019	10.1038/s41586-019-1237-9	NONIBD	8728333	8728333	10	SRR5947027
IBDMDB_nonIBD_HSM7J4IW	NONIBD	Lloyd-Price_2019	10.1038/s41586-019-1237-9	NONIBD	7418197	7418197	8	SRR5947031
IBDMDB_nonIBD_HSM7J4KC	NONIBD	Lloyd-Price_2019	10.1038/s41586-019-1237-9	NONIBD	14575427	14575427	3	SRR5936165
IBDMDB_nonIBD_HSM7J4KG	NONIBD	Lloyd-Price_2019	10.1038/s41586-019-1237-9	NONIBD	7207880	7207880	7	SRR5950562
IBDMDB_nonIBD_HSM7J4KI	NONIBD	Lloyd-Price_2019	10.1038/s41586-019-1237-9	NONIBD	12079518	12079518	11	SRR5950603
IBDMDB_nonIBD_HSM7J4KK	NONIBD	Lloyd-Price_2019	10.1038/s41586-019-1237-9	NONIBD	17388772	17388772	16	SRR5935848
IBDMDB_nonIBD_HSM7J4KM	NONIBD	Lloyd-Price_2019	10.1038/s41586-019-1237-9	NONIBD	10270644	10270644	5	SRR5950753
IBDMDB_nonIBD_HSM7J4KO	NONIBD	Lloyd-Price_2019	10.1038/s41586-019-1237-9	NONIBD	10274367	10274367	5	SRR5950646
IBDMDB_nonIBD_HSM7J4KQ	NONIBD	Lloyd-Price_2019	10.1038/s41586-019-1237-9	NONIBD	14186155	14186155	7	SRR5936173
IBDMDB_nonIBD_HSM7J4LD	NONIBD	Lloyd-Price_2019	10.1038/s41586-019-1237-9	NONIBD	14228144	14228144	5	SRR5935991
IBDMDB_nonIBD_HSM7J4LF	NONIBD	Lloyd-Price_2019	10.1038/s41586-019-1237-9	NONIBD	9052736	9052736	5	SRR5950638
IBDMDB_nonIBD_HSM7J4LN	NONIBD	Lloyd-Price_2019	10.1038/s41586-019-1237-9	NONIBD	13545611	13545611	8	SRR5935851
IBDMDB_nonIBD_HSM7J4NY	NONIBD	Lloyd-Price_2019	10.1038/s41586-019-1237-9	NONIBD	13236375	13236375	13	SRR5950717
IBDMDB_nonIBD_HSM7J4O1	NONIBD	Lloyd-Price_2019	10.1038/s41586-019-1237-9	NONIBD	14701110	14701110	10	SRR5950528
IBDMDB_nonIBD_HSM7J4O3	NONIBD	Lloyd-Price_2019	10.1038/s41586-019-1237-9	NONIBD	14656568	14656568	13	SRR5935772
IBDMDB_nonIBD_HSM7J4O5	NONIBD	Lloyd-Price_2019	10.1038/s41586-019-1237-9	NONIBD	12286042	12286042	10	SRR5950649
IBDMDB_nonIBD_HSM7J4O7	NONIBD	Lloyd-Price_2019	10.1038/s41586-019-1237-9	NONIBD	21029613	21029613	12	SRR5950729
IBDMDB_nonIBD_HSM7J4O9	NONIBD	Lloyd-Price_2019	10.1038/s41586-019-1237-9	NONIBD	16908306	16908306	12	SRR5946857
IBDMDB_nonIBD_HSM7J4QZ	NONIBD	Lloyd-Price_2019	10.1038/s41586-019-1237-9	NONIBD	10523173	10523173	14	SRR5947004
IBDMDB_nonIBD_HSM7J4R2	NONIBD	Lloyd-Price_2019	10.1038/s41586-019-1237-9	NONIBD	16949961	16949961	9	SRR5936065
IBDMDB_nonIBD_HSM7J4RE	NONIBD	Lloyd-Price_2019	10.1038/s41586-019-1237-9	NONIBD	10394118	10394118	11	SRR5947104
IBDMDB_nonIBD_HSMA33J3	NONIBD	Lloyd-Price_2019	10.1038/s41586-019-1237-9	NONIBD	17756275	17756275	8	SRR5946931
IBDMDB_nonIBD_HSMA33J5	NONIBD	Lloyd-Price_2019	10.1038/s41586-019-1237-9	NONIBD	13706715	13706715	6	SRR5947024
IBDMDB_nonIBD_HSMA33J7	NONIBD	Lloyd-Price_2019	10.1038/s41586-019-1237-9	NONIBD	9547993	9547993	9	SRR5950582
IBDMDB_nonIBD_HSMA33J9	NONIBD	Lloyd-Price_2019	10.1038/s41586-019-1237-9	NONIBD	9891795	9891795	10	SRR5950704
IBDMDB_nonIBD_HSMA33MS	NONIBD	Lloyd-Price_2019	10.1038/s41586-019-1237-9	NONIBD	13634145	13634145	7	SRR5946959
IBDMDB_nonIBD_HSMA33NY	NONIBD	Lloyd-Price_2019	10.1038/s41586-019-1237-9	NONIBD	10249532	10249532	9	SRR5950498
IBDMDB_nonIBD_HSMA33QM	NONIBD	Lloyd-Price_2019	10.1038/s41586-019-1237-9	NONIBD	13983829	13983829	12	SRR5950522
IBDMDB_nonIBD_HSMA33QO	NONIBD	Lloyd-Price_2019	10.1038/s41586-019-1237-9	NONIBD	15075366	15075366	4	SRR5946828
IBDMDB_nonIBD_HSMA33SE	NONIBD	Lloyd-Price_2019	10.1038/s41586-019-1237-9	NONIBD	14853730	14853730	15	SRR5950708
IBDMDB_nonIBD_HSMA33SG	NONIBD	Lloyd-Price_2019	10.1038/s41586-019-1237-9	NONIBD	6373915	6373915	8	SRR5946640
IBDMDB_nonIBD_HSMA33SI	NONIBD	Lloyd-Price_2019	10.1038/s41586-019-1237-9	NONIBD	11657062	11657062	10	SRR5946712
IBDMDB_nonIBD_HSMA33SK	NONIBD	Lloyd-Price_2019	10.1038/s41586-019-1237-9	NONIBD	12958887	12958887	11	SRR5946708
IBDMDB_nonIBD_MSM6J2HN	NONIBD	Lloyd-Price_2019	10.1038/s41586-019-1237-9	NONIBD	19483008	19483008	7	SRR5947000
IBDMDB_nonIBD_MSM6J2HP	NONIBD	Lloyd-Price_2019	10.1038/s41586-019-1237-9	NONIBD	9525755	9525755	9	SRR5936084
IBDMDB_nonIBD_MSM6J2HR	NONIBD	Lloyd-Price_2019	10.1038/s41586-019-1237-9	NONIBD	16124895	16124895	10	SRR5935916
IBDMDB_nonIBD_MSM6J2HT	NONIBD	Lloyd-Price_2019	10.1038/s41586-019-1237-9	NONIBD	18437729	18437729	12	SRR5935749
IBDMDB_nonIBD_MSM6J2JN	NONIBD	Lloyd-Price_2019	10.1038/s41586-019-1237-9	NONIBD	15878335	15878335	9	SRR5935827
IBDMDB_nonIBD_MSM6J2JP	NONIBD	Lloyd-Price_2019	10.1038/s41586-019-1237-9	NONIBD	7804828	7804828	4	SRR5935912
IBDMDB_nonIBD_MSM6J2JR	NONIBD	Lloyd-Price_2019	10.1038/s41586-019-1237-9	NONIBD	14449888	14449888	8	SRR5935784
IBDMDB_nonIBD_MSM6J2JT	NONIBD	Lloyd-Price_2019	10.1038/s41586-019-1237-9	NONIBD	12848824	12848824	8	SRR5946911
IBDMDB_nonIBD_MSM6J2JZ	NONIBD	Lloyd-Price_2019	10.1038/s41586-019-1237-9	NONIBD	12401022	12401022	10	SRR5935833
IBDMDB_nonIBD_MSM6J2K2	NONIBD	Lloyd-Price_2019	10.1038/s41586-019-1237-9	NONIBD	12103471	12103471	10	SRR5935914
IBDMDB_nonIBD_MSM6J2K4	NONIBD	Lloyd-Price_2019	10.1038/s41586-019-1237-9	NONIBD	20714102	20714102	16	SRR5946985
IBDMDB_nonIBD_MSM6J2K6	NONIBD	Lloyd-Price_2019	10.1038/s41586-019-1237-9	NONIBD	17233057	17233057	12	SRR5935938
IBDMDB_nonIBD_MSM6J2K8	NONIBD	Lloyd-Price_2019	10.1038/s41586-019-1237-9	NONIBD	8482527	8482527	9	SRR5946671
IBDMDB_nonIBD_MSM6J2KA	NONIBD	Lloyd-Price_2019	10.1038/s41586-019-1237-9	NONIBD	14708895	14708895	15	SRR5946921
IBDMDB_nonIBD_MSM6J2LV	NONIBD	Lloyd-Price_2019	10.1038/s41586-019-1237-9	NONIBD	8895349	8895349	10	SRR5935812
IBDMDB_nonIBD_MSM6J2LW	NONIBD	Lloyd-Price_2019	10.1038/s41586-019-1237-9	NONIBD	19306966	19306966	17	SRR5946626
IBDMDB_nonIBD_MSM6J2LY	NONIBD	Lloyd-Price_2019	10.1038/s41586-019-1237-9	NONIBD	12521454	12521454	14	SRR5946880
IBDMDB_nonIBD_MSM6J2M3	NONIBD	Lloyd-Price_2019	10.1038/s41586-019-1237-9	NONIBD	14388653	14388653	16	SRR5935963
IBDMDB_nonIBD_MSM6J2PO	NONIBD	Lloyd-Price_2019	10.1038/s41586-019-1237-9	NONIBD	7849380	7849380	6	SRR5947048
IBDMDB_nonIBD_MSM6J2PS	NONIBD	Lloyd-Price_2019	10.1038/s41586-019-1237-9	NONIBD	12500974	12500974	19	SRR5936231
IBDMDB_nonIBD_MSM6J2PU	NONIBD	Lloyd-Price_2019	10.1038/s41586-019-1237-9	NONIBD	2072056	2072056	4	SRR5935892
IBDMDB_nonIBD_MSM6J2PW	NONIBD	Lloyd-Price_2019	10.1038/s41586-019-1237-9	NONIBD	8726952	8726952	6	SRR5946987
IBDMDB_nonIBD_MSM6J2Q1	NONIBD	Lloyd-Price_2019	10.1038/s41586-019-1237-9	NONIBD	16192396	16192396	13	SRR5936013
IBDMDB_nonIBD_MSM6J2QF	NONIBD	Lloyd-Price_2019	10.1038/s41586-019-1237-9	NONIBD	13731225	13731225	7	SRR5936052
IBDMDB_nonIBD_MSM6J2QH	NONIBD	Lloyd-Price_2019	10.1038/s41586-019-1237-9	NONIBD	13583613	13583613	9	SRR5935995
IBDMDB_nonIBD_MSM6J2QJ	NONIBD	Lloyd-Price_2019	10.1038/s41586-019-1237-9	NONIBD	10158235	10158235	6	SRR5946751
IBDMDB_nonIBD_MSM6J2QL	NONIBD	Lloyd-Price_2019	10.1038/s41586-019-1237-9	NONIBD	16245768	16245768	8	SRR5947097
IBDMDB_nonIBD_MSM6J2QP	NONIBD	Lloyd-Price_2019	10.1038/s41586-019-1237-9	NONIBD	13929297	13929297	8	SRR5935817
IBDMDB_nonIBD_MSM6J2RK	NONIBD	Lloyd-Price_2019	10.1038/s41586-019-1237-9	NONIBD	19945037	19945037	20	SRR5946760
IBDMDB_nonIBD_MSM6J2RM	NONIBD	Lloyd-Price_2019	10.1038/s41586-019-1237-9	NONIBD	18040224	18040224	11	SRR5946628
IBDMDB_nonIBD_MSM6J2RO	NONIBD	Lloyd-Price_2019	10.1038/s41586-019-1237-9	NONIBD	14915108	14915108	10	SRR5935810
IBDMDB_nonIBD_MSM6J2RQ	NONIBD	Lloyd-Price_2019	10.1038/s41586-019-1237-9	NONIBD	22874262	22874262	17	SRR5946876
IBDMDB_nonIBD_MSM6J2RS	NONIBD	Lloyd-Price_2019	10.1038/s41586-019-1237-9	NONIBD	16276425	16276425	4	SRR5936238
IBDMDB_nonIBD_MSM6J2RU	NONIBD	Lloyd-Price_2019	10.1038/s41586-019-1237-9	NONIBD	20469783	20469783	20	SRR5946747
IBDMDB_nonIBD_MSM6J2SE	NONIBD	Lloyd-Price_2019	10.1038/s41586-019-1237-9	NONIBD	12815907	12815907	11	SRR5936035
IBDMDB_nonIBD_MSM6J2SI	NONIBD	Lloyd-Price_2019	10.1038/s41586-019-1237-9	NONIBD	12299564	12299564	8	SRR5946652
IBDMDB_nonIBD_MSM6J2SK	NONIBD	Lloyd-Price_2019	10.1038/s41586-019-1237-9	NONIBD	14246562	14246562	7	SRR5935985
IBDMDB_nonIBD_MSM79H54	NONIBD	Lloyd-Price_2019	10.1038/s41586-019-1237-9	NONIBD	12591729	12591729	8	SRR5935984
IBDMDB_nonIBD_MSM79H58	NONIBD	Lloyd-Price_2019	10.1038/s41586-019-1237-9	NONIBD	12761771	12761771	11	SRR5946682
IBDMDB_nonIBD_MSM79H5A	NONIBD	Lloyd-Price_2019	10.1038/s41586-019-1237-9	NONIBD	11411352	11411352	10	SRR5946651
IBDMDB_nonIBD_MSM79H5E	NONIBD	Lloyd-Price_2019	10.1038/s41586-019-1237-9	NONIBD	10286631	10286631	12	SRR5935740
IBDMDB_nonIBD_MSM79H5G	NONIBD	Lloyd-Price_2019	10.1038/s41586-019-1237-9	NONIBD	11267730	11267730	11	SRR5935981
IBDMDB_nonIBD_MSM79H5K	NONIBD	Lloyd-Price_2019	10.1038/s41586-019-1237-9	NONIBD	13454821	13454821	24	SRR5936132
IBDMDB_nonIBD_MSM79H5M	NONIBD	Lloyd-Price_2019	10.1038/s41586-019-1237-9	NONIBD	15332575	15332575	19	SRR5946818
IBDMDB_nonIBD_MSM79H5Q	NONIBD	Lloyd-Price_2019	10.1038/s41586-019-1237-9	NONIBD	13615900	13615900	10	SRR5936112
IBDMDB_nonIBD_MSM79H5S	NONIBD	Lloyd-Price_2019	10.1038/s41586-019-1237-9	NONIBD	13454676	13454676	11	SRR5946851
IBDMDB_nonIBD_MSM79H5U	NONIBD	Lloyd-Price_2019	10.1038/s41586-019-1237-9	NONIBD	9764737	9764737	6	SRR5946788
IBDMDB_nonIBD_MSM79H5Y	NONIBD	Lloyd-Price_2019	10.1038/s41586-019-1237-9	NONIBD	15420571	15420571	10	SRR5935876
IBDMDB_nonIBD_MSM79H6D	NONIBD	Lloyd-Price_2019	10.1038/s41586-019-1237-9	NONIBD	19725855	19725855	20	SRR5946867
IBDMDB_nonIBD_MSM79H6F	NONIBD	Lloyd-Price_2019	10.1038/s41586-019-1237-9	NONIBD	1730026	1730026	0	SRR5935793
IBDMDB_nonIBD_MSM79H6H	NONIBD	Lloyd-Price_2019	10.1038/s41586-019-1237-9	NONIBD	14854484	14854484	13	SRR5946817
IBDMDB_nonIBD_MSM79H6J	NONIBD	Lloyd-Price_2019	10.1038/s41586-019-1237-9	NONIBD	15939152	15939152	15	SRR5946791
IBDMDB_nonIBD_MSM79H6L	NONIBD	Lloyd-Price_2019	10.1038/s41586-019-1237-9	NONIBD	15562805	15562805	14	SRR5946930
IBDMDB_nonIBD_MSM79H6N	NONIBD	Lloyd-Price_2019	10.1038/s41586-019-1237-9	NONIBD	18390121	18390121	16	SRR5946847
IBDMDB_nonIBD_MSM79H6Y	NONIBD	Lloyd-Price_2019	10.1038/s41586-019-1237-9	NONIBD	5676928	5676928	7	SRR5950571
IBDMDB_nonIBD_MSM79H7O	NONIBD	Lloyd-Price_2019	10.1038/s41586-019-1237-9	NONIBD	12765858	12765858	10	SRR5935970
IBDMDB_nonIBD_MSM79H7Q	NONIBD	Lloyd-Price_2019	10.1038/s41586-019-1237-9	NONIBD	14338548	14338548	16	SRR5936095
IBDMDB_nonIBD_MSM79H7W	NONIBD	Lloyd-Price_2019	10.1038/s41586-019-1237-9	NONIBD	12167552	12167552	11	SRR5950531
IBDMDB_nonIBD_MSM79H7Y	NONIBD	Lloyd-Price_2019	10.1038/s41586-019-1237-9	NONIBD	11533742	11533742	14	SRR5936099
IBDMDB_nonIBD_MSM79H81	NONIBD	Lloyd-Price_2019	10.1038/s41586-019-1237-9	NONIBD	11516160	11516160	11	SRR5935971
IBDMDB_nonIBD_MSM79H83	NONIBD	Lloyd-Price_2019	10.1038/s41586-019-1237-9	NONIBD	20624338	20624338	9	SRR5936098
IBDMDB_nonIBD_MSM79H85	NONIBD	Lloyd-Price_2019	10.1038/s41586-019-1237-9	NONIBD	17168127	17168127	11	SRR5950506
IBDMDB_nonIBD_MSM79H87	NONIBD	Lloyd-Price_2019	10.1038/s41586-019-1237-9	NONIBD	17409440	17409440	10	SRR5935872
IBDMDB_nonIBD_MSM79H89	NONIBD	Lloyd-Price_2019	10.1038/s41586-019-1237-9	NONIBD	9708582	9708582	8	SRR5950563
IBDMDB_nonIBD_MSM79H8B	NONIBD	Lloyd-Price_2019	10.1038/s41586-019-1237-9	NONIBD	10799787	10799787	8	SRR5950602
IBDMDB_nonIBD_MSM79H8D	NONIBD	Lloyd-Price_2019	10.1038/s41586-019-1237-9	NONIBD	15989142	15989142	10	SRR5935843
IBDMDB_nonIBD_MSM79H8F	NONIBD	Lloyd-Price_2019	10.1038/s41586-019-1237-9	NONIBD	12264186	12264186	7	SRR5947029
IBDMDB_nonIBD_MSM79H8H	NONIBD	Lloyd-Price_2019	10.1038/s41586-019-1237-9	NONIBD	7530488	7530488	8	SRR5947032
IBDMDB_nonIBD_MSM79H8L	NONIBD	Lloyd-Price_2019	10.1038/s41586-019-1237-9	NONIBD	10227793	10227793	7	SRR5935924
IBDMDB_nonIBD_MSM79H8N	NONIBD	Lloyd-Price_2019	10.1038/s41586-019-1237-9	NONIBD	13933295	13933295	6	SRR5950690
IBDMDB_nonIBD_MSM79H9A	NONIBD	Lloyd-Price_2019	10.1038/s41586-019-1237-9	NONIBD	14039616	14039616	11	SRR5936118
IBDMDB_nonIBD_MSM79H9C	NONIBD	Lloyd-Price_2019	10.1038/s41586-019-1237-9	NONIBD	12423612	12423612	11	SRR5950759
IBDMDB_nonIBD_MSM79H9G	NONIBD	Lloyd-Price_2019	10.1038/s41586-019-1237-9	NONIBD	13823108	13823108	13	SRR5935968
IBDMDB_nonIBD_MSM79H9K	NONIBD	Lloyd-Price_2019	10.1038/s41586-019-1237-9	NONIBD	11347443	11347443	13	SRR5935975
IBDMDB_nonIBD_MSM79H9M	NONIBD	Lloyd-Price_2019	10.1038/s41586-019-1237-9	NONIBD	13043502	13043502	17	SRR5936020
IBDMDB_nonIBD_MSM79H9Q	NONIBD	Lloyd-Price_2019	10.1038/s41586-019-1237-9	NONIBD	10442958	10442958	9	SRR5936058
IBDMDB_nonIBD_MSM79H9W	NONIBD	Lloyd-Price_2019	10.1038/s41586-019-1237-9	NONIBD	13075493	13075493	18	SRR5936097
IBDMDB_nonIBD_MSM79H9Y	NONIBD	Lloyd-Price_2019	10.1038/s41586-019-1237-9	NONIBD	12599165	12599165	19	SRR5936115
IBDMDB_nonIBD_MSM79HA1	NONIBD	Lloyd-Price_2019	10.1038/s41586-019-1237-9	NONIBD	19335712	19335712	11	SRR5946776
IBDMDB_nonIBD_MSM79HA3	NONIBD	Lloyd-Price_2019	10.1038/s41586-019-1237-9	NONIBD	15568248	15568248	8	SRR5935989
IBDMDB_nonIBD_MSM79HA7	NONIBD	Lloyd-Price_2019	10.1038/s41586-019-1237-9	NONIBD	15491575	15491575	14	SRR5950520
IBDMDB_nonIBD_MSM79HAH	NONIBD	Lloyd-Price_2019	10.1038/s41586-019-1237-9	NONIBD	10364942	10364942	8	SRR5935976
IBDMDB_nonIBD_MSM79HB6	NONIBD	Lloyd-Price_2019	10.1038/s41586-019-1237-9	NONIBD	10762403	10762403	8	SRR5935850
IBDMDB_nonIBD_MSM79HBB	NONIBD	Lloyd-Price_2019	10.1038/s41586-019-1237-9	NONIBD	11186327	11186327	12	SRR5935825
IBDMDB_nonIBD_MSM79HBL	NONIBD	Lloyd-Price_2019	10.1038/s41586-019-1237-9	NONIBD	14527100	14527100	10	SRR5946787
IBDMDB_nonIBD_MSM79HC4	NONIBD	Lloyd-Price_2019	10.1038/s41586-019-1237-9	NONIBD	12823881	12823881	13	SRR5935866
IBDMDB_nonIBD_MSM79HC8	NONIBD	Lloyd-Price_2019	10.1038/s41586-019-1237-9	NONIBD	11793442	11793442	14	SRR5936191
IBDMDB_nonIBD_MSM79HCG	NONIBD	Lloyd-Price_2019	10.1038/s41586-019-1237-9	NONIBD	18005298	18005298	7	SRR5946701
IBDMDB_nonIBD_MSM79HCI	NONIBD	Lloyd-Price_2019	10.1038/s41586-019-1237-9	NONIBD	11538091	11538091	9	SRR5936019
IBDMDB_nonIBD_MSM79HCK	NONIBD	Lloyd-Price_2019	10.1038/s41586-019-1237-9	NONIBD	10646129	10646129	8	SRR5936198
IBDMDB_nonIBD_MSM79HCP	NONIBD	Lloyd-Price_2019	10.1038/s41586-019-1237-9	NONIBD	13768704	13768704	12	SRR5936056
IBDMDB_nonIBD_MSM79HCR	NONIBD	Lloyd-Price_2019	10.1038/s41586-019-1237-9	NONIBD	5407192	5407192	5	SRR5936137
IBDMDB_nonIBD_MSM79HES	NONIBD	Lloyd-Price_2019	10.1038/s41586-019-1237-9	NONIBD	12668575	12668575	14	SRR5946846
IBDMDB_nonIBD_MSM79HEU	NONIBD	Lloyd-Price_2019	10.1038/s41586-019-1237-9	NONIBD	11477598	11477598	7	SRR5936081
IBDMDB_nonIBD_MSM79HEW	NONIBD	Lloyd-Price_2019	10.1038/s41586-019-1237-9	NONIBD	5433644	5433644	4	SRR5946772
IBDMDB_nonIBD_MSM79HEY	NONIBD	Lloyd-Price_2019	10.1038/s41586-019-1237-9	NONIBD	11646872	11646872	8	SRR5935795
IBDMDB_nonIBD_MSM79HFW	NONIBD	Lloyd-Price_2019	10.1038/s41586-019-1237-9	NONIBD	14626559	14626559	11	SRR5946777
IBDMDB_nonIBD_MSM79HFY	NONIBD	Lloyd-Price_2019	10.1038/s41586-019-1237-9	NONIBD	14653928	14653928	13	SRR5936195
IBDMDB_nonIBD_MSM9VZF7	NONIBD	Lloyd-Price_2019	10.1038/s41586-019-1237-9	NONIBD	17733172	17733172	12	SRR5947028
IBDMDB_nonIBD_MSM9VZFF	NONIBD	Lloyd-Price_2019	10.1038/s41586-019-1237-9	NONIBD	14019532	14019532	15	SRR5936143
IBDMDB_nonIBD_MSM9VZFH	NONIBD	Lloyd-Price_2019	10.1038/s41586-019-1237-9	NONIBD	13627597	13627597	13	SRR5950686
IBDMDB_nonIBD_MSM9VZFL	NONIBD	Lloyd-Price_2019	10.1038/s41586-019-1237-9	NONIBD	10850270	10850270	8	SRR5936168
IBDMDB_nonIBD_MSM9VZFN	NONIBD	Lloyd-Price_2019	10.1038/s41586-019-1237-9	NONIBD	10644101	10644101	9	SRR5950524
IBDMDB_nonIBD_MSM9VZFR	NONIBD	Lloyd-Price_2019	10.1038/s41586-019-1237-9	NONIBD	14100276	14100276	7	SRR5935929
IBDMDB_nonIBD_MSM9VZFT	NONIBD	Lloyd-Price_2019	10.1038/s41586-019-1237-9	NONIBD	10192795	10192795	7	SRR5950689
IBDMDB_nonIBD_MSM9VZGO	NONIBD	Lloyd-Price_2019	10.1038/s41586-019-1237-9	NONIBD	11268420	11268420	10	SRR5936105
IBDMDB_nonIBD_MSM9VZGS	NONIBD	Lloyd-Price_2019	10.1038/s41586-019-1237-9	NONIBD	8400238	8400238	9	SRR5950652
IBDMDB_nonIBD_MSM9VZGU	NONIBD	Lloyd-Price_2019	10.1038/s41586-019-1237-9	NONIBD	10200377	10200377	10	SRR5950733
IBDMDB_nonIBD_MSM9VZGW	NONIBD	Lloyd-Price_2019	10.1038/s41586-019-1237-9	NONIBD	11068145	11068145	10	SRR5950702
IBDMDB_nonIBD_MSM9VZGY	NONIBD	Lloyd-Price_2019	10.1038/s41586-019-1237-9	NONIBD	5677181	5677181	5	SRR5947069
IBDMDB_nonIBD_MSM9VZH7	NONIBD	Lloyd-Price_2019	10.1038/s41586-019-1237-9	NONIBD	6410092	6410092	6	SRR5950519
IBDMDB_nonIBD_MSM9VZHB	NONIBD	Lloyd-Price_2019	10.1038/s41586-019-1237-9	NONIBD	11927728	11927728	11	SRR5946803
IBDMDB_nonIBD_MSM9VZHF	NONIBD	Lloyd-Price_2019	10.1038/s41586-019-1237-9	NONIBD	9330611	9330611	8	SRR5946895
IBDMDB_nonIBD_MSM9VZHJ	NONIBD	Lloyd-Price_2019	10.1038/s41586-019-1237-9	NONIBD	9237747	9237747	7	SRR5947022
IBDMDB_nonIBD_MSM9VZHL	NONIBD	Lloyd-Price_2019	10.1038/s41586-019-1237-9	NONIBD	4978066	4978066	3	SRR5950697
IBDMDB_nonIBD_MSM9VZHN	NONIBD	Lloyd-Price_2019	10.1038/s41586-019-1237-9	NONIBD	16022131	16022131	13	SRR5946670
IBDMDB_nonIBD_MSM9VZHP	NONIBD	Lloyd-Price_2019	10.1038/s41586-019-1237-9	NONIBD	8813207	8813207	11	SRR5950658
IBDMDB_nonIBD_MSM9VZHR	NONIBD	Lloyd-Price_2019	10.1038/s41586-019-1237-9	NONIBD	10805695	10805695	7	SRR5950783
IBDMDB_nonIBD_MSM9VZHT	NONIBD	Lloyd-Price_2019	10.1038/s41586-019-1237-9	NONIBD	7352766	7352766	8	SRR5946952
IBDMDB_nonIBD_MSM9VZHX	NONIBD	Lloyd-Price_2019	10.1038/s41586-019-1237-9	NONIBD	14032317	14032317	7	SRR5946672
IBDMDB_nonIBD_MSM9VZHZ	NONIBD	Lloyd-Price_2019	10.1038/s41586-019-1237-9	NONIBD	6832870	6832870	5	SRR5950696
IBDMDB_nonIBD_MSM9VZI2	NONIBD	Lloyd-Price_2019	10.1038/s41586-019-1237-9	NONIBD	12753399	12753399	7	SRR5947070
IBDMDB_nonIBD_MSM9VZI6	NONIBD	Lloyd-Price_2019	10.1038/s41586-019-1237-9	NONIBD	14680858	14680858	7	SRR5946725
IBDMDB_nonIBD_MSM9VZJZ	NONIBD	Lloyd-Price_2019	10.1038/s41586-019-1237-9	NONIBD	16218256	16142526	12	SRR5947081
IBDMDB_nonIBD_MSM9VZKC	NONIBD	Lloyd-Price_2019	10.1038/s41586-019-1237-9	NONIBD	8730882	8730882	8	SRR5946731
IBDMDB_nonIBD_MSM9VZKE	NONIBD	Lloyd-Price_2019	10.1038/s41586-019-1237-9	NONIBD	14468694	14468694	10	SRR5946925
IBDMDB_nonIBD_MSM9VZKI	NONIBD	Lloyd-Price_2019	10.1038/s41586-019-1237-9	NONIBD	13268695	13268695	11	SRR5947019
IBDMDB_nonIBD_MSM9VZL5	NONIBD	Lloyd-Price_2019	10.1038/s41586-019-1237-9	NONIBD	16741102	16741102	11	SRR5946924
IBDMDB_nonIBD_MSM9VZL7	NONIBD	Lloyd-Price_2019	10.1038/s41586-019-1237-9	NONIBD	9024349	9024349	9	SRR5950545
IBDMDB_nonIBD_MSM9VZL9	NONIBD	Lloyd-Price_2019	10.1038/s41586-019-1237-9	NONIBD	14004738	14004738	14	SRR5946923
IBDMDB_nonIBD_MSM9VZLB	NONIBD	Lloyd-Price_2019	10.1038/s41586-019-1237-9	NONIBD	16737184	16737184	17	SRR5946905
IBDMDB_nonIBD_MSM9VZLD	NONIBD	Lloyd-Price_2019	10.1038/s41586-019-1237-9	NONIBD	8501435	8501435	10	SRR5950581
IBDMDB_nonIBD_MSM9VZLF	NONIBD	Lloyd-Price_2019	10.1038/s41586-019-1237-9	NONIBD	8700349	8700349	9	SRR5950699
IBDMDB_nonIBD_MSM9VZLH	NONIBD	Lloyd-Price_2019	10.1038/s41586-019-1237-9	NONIBD	9205786	9205786	10	SRR5950660
IBDMDB_nonIBD_MSM9VZLJ	NONIBD	Lloyd-Price_2019	10.1038/s41586-019-1237-9	NONIBD	12694174	12694174	16	SRR5946971
IBDMDB_nonIBD_MSM9VZMA	NONIBD	Lloyd-Price_2019	10.1038/s41586-019-1237-9	NONIBD	20217388	20217388	10	SRR5935773
IBDMDB_nonIBD_MSM9VZMA_TR	NONIBD	Lloyd-Price_2019	10.1038/s41586-019-1237-9	NONIBD	11375167	11375167	7	SRR5962902
IBDMDB_nonIBD_MSM9VZMC	NONIBD	Lloyd-Price_2019	10.1038/s41586-019-1237-9	NONIBD	15754249	15754249	7	SRR5950727
IBDMDB_nonIBD_MSM9VZME	NONIBD	Lloyd-Price_2019	10.1038/s41586-019-1237-9	NONIBD	10512589	10512589	7	SRR5950726
IBDMDB_nonIBD_MSM9VZMI	NONIBD	Lloyd-Price_2019	10.1038/s41586-019-1237-9	NONIBD	20481375	20481375	5	SRR5946737
IBDMDB_nonIBD_MSM9VZMM	NONIBD	Lloyd-Price_2019	10.1038/s41586-019-1237-9	NONIBD	21301810	21301810	9	SRR5936197
IBDMDB_nonIBD_MSM9VZMO	NONIBD	Lloyd-Price_2019	10.1038/s41586-019-1237-9	NONIBD	10306449	10306449	10	SRR5935778
IBDMDB_nonIBD_MSM9VZMS	NONIBD	Lloyd-Price_2019	10.1038/s41586-019-1237-9	NONIBD	11477820	11477820	12	SRR5950693
IBDMDB_nonIBD_MSM9VZMU	NONIBD	Lloyd-Price_2019	10.1038/s41586-019-1237-9	NONIBD	16564754	16564754	18	SRR5946969
IBDMDB_nonIBD_MSM9VZMW	NONIBD	Lloyd-Price_2019	10.1038/s41586-019-1237-9	NONIBD	11042999	11042999	15	SRR5950491
IBDMDB_nonIBD_MSM9VZNH	NONIBD	Lloyd-Price_2019	10.1038/s41586-019-1237-9	NONIBD	11976458	11976458	13	SRR5935774
IBDMDB_nonIBD_MSM9VZNH_TR	NONIBD	Lloyd-Price_2019	10.1038/s41586-019-1237-9	NONIBD	8501389	8501389	11	SRR5962906
IBDMDB_nonIBD_MSM9VZNL	NONIBD	Lloyd-Price_2019	10.1038/s41586-019-1237-9	NONIBD	10231687	10231687	12	SRR5946966
IBDMDB_nonIBD_MSM9VZOG	NONIBD	Lloyd-Price_2019	10.1038/s41586-019-1237-9	NONIBD	17626513	6797045	13	SRR5935849
IBDMDB_nonIBD_MSM9VZOI	NONIBD	Lloyd-Price_2019	10.1038/s41586-019-1237-9	NONIBD	11244365	11244365	5	SRR5950735
IBDMDB_nonIBD_MSM9VZOK	NONIBD	Lloyd-Price_2019	10.1038/s41586-019-1237-9	NONIBD	6531847	6531847	8	SRR5946866
IBDMDB_nonIBD_MSM9VZOM	NONIBD	Lloyd-Price_2019	10.1038/s41586-019-1237-9	NONIBD	11736092	11736092	6	SRR5950549
IBDMDB_nonIBD_MSM9VZOO	NONIBD	Lloyd-Price_2019	10.1038/s41586-019-1237-9	NONIBD	10092531	10092531	6	SRR5950584
IBDMDB_nonIBD_MSM9VZOQ	NONIBD	Lloyd-Price_2019	10.1038/s41586-019-1237-9	NONIBD	8232246	8232246	7	SRR5946808
IBDMDB_nonIBD_MSM9VZPT	NONIBD	Lloyd-Price_2019	10.1038/s41586-019-1237-9	NONIBD	14341595	14341595	14	SRR5946981
IBDMDB_nonIBD_MSMA26BB	NONIBD	Lloyd-Price_2019	10.1038/s41586-019-1237-9	NONIBD	15888021	15888021	13	SRR5947072
IBDMDB_nonIBD_MSMA26BD	NONIBD	Lloyd-Price_2019	10.1038/s41586-019-1237-9	NONIBD	9160629	9160629	11	SRR5950747
IBDMDB_nonIBD_MSMA26BF	NONIBD	Lloyd-Price_2019	10.1038/s41586-019-1237-9	NONIBD	10393963	10393963	8	SRR5950489
IBDMDB_nonIBD_MSMA26BH	NONIBD	Lloyd-Price_2019	10.1038/s41586-019-1237-9	NONIBD	9952819	9952819	9	SRR5950515
IBDMDB_nonIBD_MSMA26BJ	NONIBD	Lloyd-Price_2019	10.1038/s41586-019-1237-9	NONIBD	10202120	10202120	13	SRR5950512
IBDMDB_nonIBD_MSMA26BL	NONIBD	Lloyd-Price_2019	10.1038/s41586-019-1237-9	NONIBD	12848782	12848782	7	SRR5950598
IBDMDB_nonIBD_MSMA26BN	NONIBD	Lloyd-Price_2019	10.1038/s41586-019-1237-9	NONIBD	13216761	13216761	10	SRR5950784
IBDMDB_nonIBD_MSMA26BR	NONIBD	Lloyd-Price_2019	10.1038/s41586-019-1237-9	NONIBD	7590439	7590439	7	SRR5946723
IBDMDB_nonIBD_MSMA26BT	NONIBD	Lloyd-Price_2019	10.1038/s41586-019-1237-9	NONIBD	15251051	15251051	9	SRR5950769
IBDMDB_nonIBD_MSMA26BV	NONIBD	Lloyd-Price_2019	10.1038/s41586-019-1237-9	NONIBD	7508013	7508013	9	SRR5950518
IBDMDB_nonIBD_MSMA26BX	NONIBD	Lloyd-Price_2019	10.1038/s41586-019-1237-9	NONIBD	10389379	10389379	11	SRR5946834
IBDMDB_nonIBD_MSMA26DG	NONIBD	Lloyd-Price_2019	10.1038/s41586-019-1237-9	NONIBD	7092750	7092750	6	SRR5950664
IBDMDB_nonIBD_MSMA26DI	NONIBD	Lloyd-Price_2019	10.1038/s41586-019-1237-9	NONIBD	12740532	12740532	10	SRR5946958
IBDMDB_nonIBD_MSMA26DK	NONIBD	Lloyd-Price_2019	10.1038/s41586-019-1237-9	NONIBD	15707850	15707850	11	SRR5950745
IBDMDB_nonIBD_MSMA26DM	NONIBD	Lloyd-Price_2019	10.1038/s41586-019-1237-9	NONIBD	15197297	15197297	9	SRR5947017
IBDMDB_nonIBD_MSMA26DO	NONIBD	Lloyd-Price_2019	10.1038/s41586-019-1237-9	NONIBD	15472665	15472665	8	SRR5946955
IBDMDB_nonIBD_MSMAPC5H	NONIBD	Lloyd-Price_2019	10.1038/s41586-019-1237-9	NONIBD	9835585	9835585	7	SRR5950594
IBDMDB_nonIBD_MSMAPC5L	NONIBD	Lloyd-Price_2019	10.1038/s41586-019-1237-9	NONIBD	12496265	12496265	9	SRR5946891
IBDMDB_nonIBD_MSMAPC6K	NONIBD	Lloyd-Price_2019	10.1038/s41586-019-1237-9	NONIBD	15359499	15359499	11	SRR5946889
IBDMDB_nonIBD_MSMAPC6M	NONIBD	Lloyd-Price_2019	10.1038/s41586-019-1237-9	NONIBD	11010761	11010761	11	SRR5950559
IBDMDB_nonIBD_MSMAPC6O	NONIBD	Lloyd-Price_2019	10.1038/s41586-019-1237-9	NONIBD	9517488	9517488	8	SRR5950561
IBDMDB_nonIBD_MSMAPC7J	NONIBD	Lloyd-Price_2019	10.1038/s41586-019-1237-9	NONIBD	13096259	13096259	13	SRR5946831
IBDMDB_nonIBD_MSMAPC7P	NONIBD	Lloyd-Price_2019	10.1038/s41586-019-1237-9	NONIBD	10741161	10741161	6	SRR5950593
IBDMDB_nonIBD_MSMAPC7R	NONIBD	Lloyd-Price_2019	10.1038/s41586-019-1237-9	NONIBD	10793585	10793585	7	SRR5946829
IBDMDB_nonIBD_MSMAPC7T	NONIBD	Lloyd-Price_2019	10.1038/s41586-019-1237-9	NONIBD	10978350	10978350	8	SRR5946825
IBDMDB_nonIBD_MSMB4LXS	NONIBD	Lloyd-Price_2019	10.1038/s41586-019-1237-9	NONIBD	10226890	10226890	6	SRR5946844
IBDMDB_nonIBD_MSMB4LXW	NONIBD	Lloyd-Price_2019	10.1038/s41586-019-1237-9	NONIBD	6597532	6597532	7	SRR5946632
IBDMDB_nonIBD_MSMB4LZ8	NONIBD	Lloyd-Price_2019	10.1038/s41586-019-1237-9	NONIBD	10874656	10874656	11	SRR5946707
IBDMDB_nonIBD_MSMB4LZC	NONIBD	Lloyd-Price_2019	10.1038/s41586-019-1237-9	NONIBD	7592072	7592072	5	SRR5946713
IBDMDB_nonIBD_MSMB4LZK	NONIBD	Lloyd-Price_2019	10.1038/s41586-019-1237-9	NONIBD	14786059	14786059	9	SRR5947057
IBDMDB_nonIBD_MSMB4LZV	NONIBD	Lloyd-Price_2019	10.1038/s41586-019-1237-9	NONIBD	7276587	7276587	6	SRR5950706
IBDMDB_nonIBD_MSMB4LZX	NONIBD	Lloyd-Price_2019	10.1038/s41586-019-1237-9	NONIBD	7734984	7734984	8	SRR5946711
IBDMDB_nonIBD_MSMB4LZZ	NONIBD	Lloyd-Price_2019	10.1038/s41586-019-1237-9	NONIBD	11744997	11744997	9	SRR5950711
IBDMDB_nonIBD_PSM6XBTR	NONIBD	Lloyd-Price_2019	10.1038/s41586-019-1237-9	NONIBD	16125287	16125287	9	SRR5946623
IBDMDB_nonIBD_PSM6XBTT	NONIBD	Lloyd-Price_2019	10.1038/s41586-019-1237-9	NONIBD	11165873	11165873	10	SRR5946608
IBDMDB_nonIBD_PSM6XBTX	NONIBD	Lloyd-Price_2019	10.1038/s41586-019-1237-9	NONIBD	6315658	6315658	5	SRR5947012
IBDMDB_nonIBD_PSM6XBU2	NONIBD	Lloyd-Price_2019	10.1038/s41586-019-1237-9	NONIBD	10303969	10303969	6	SRR5946681
IBDMDB_nonIBD_PSM6XBW3	NONIBD	Lloyd-Price_2019	10.1038/s41586-019-1237-9	NONIBD	3052401	3052401	6	SRR5946618
IBDMDB_nonIBD_PSM7J14X	NONIBD	Lloyd-Price_2019	10.1038/s41586-019-1237-9	NONIBD	9078940	9078940	7	SRR5935771
IBDMDB_nonIBD_PSM7J154	NONIBD	Lloyd-Price_2019	10.1038/s41586-019-1237-9	NONIBD	11095535	11095535	7	SRR5946861
IBDMDB_nonIBD_PSM7J156	NONIBD	Lloyd-Price_2019	10.1038/s41586-019-1237-9	NONIBD	9317034	9317034	8	SRR5950550
IBDMDB_nonIBD_PSM7J15K	NONIBD	Lloyd-Price_2019	10.1038/s41586-019-1237-9	NONIBD	7524410	7524410	8	SRR5947035
IBDMDB_nonIBD_PSM7J15M	NONIBD	Lloyd-Price_2019	10.1038/s41586-019-1237-9	NONIBD	5094067	5094067	5	SRR5950654
IBDMDB_nonIBD_PSM7J15O	NONIBD	Lloyd-Price_2019	10.1038/s41586-019-1237-9	NONIBD	7216439	7216439	6	SRR5935836
IBDMDB_nonIBD_PSM7J15Q	NONIBD	Lloyd-Price_2019	10.1038/s41586-019-1237-9	NONIBD	8812147	8812147	9	SRR5946970
IBDMDB_nonIBD_PSM7J15S	NONIBD	Lloyd-Price_2019	10.1038/s41586-019-1237-9	NONIBD	10967601	10967601	9	SRR5947077
IBDMDB_nonIBD_PSM7J15U	NONIBD	Lloyd-Price_2019	10.1038/s41586-019-1237-9	NONIBD	4630229	4630229	2	SRR5946735
IBDMDB_nonIBD_PSM7J16U	NONIBD	Lloyd-Price_2019	10.1038/s41586-019-1237-9	NONIBD	8341391	8341391	2	SRR5935781
IBDMDB_nonIBD_PSM7J16W	NONIBD	Lloyd-Price_2019	10.1038/s41586-019-1237-9	NONIBD	12021900	12021900	6	SRR5950777
IBDMDB_nonIBD_PSM7J16Y	NONIBD	Lloyd-Price_2019	10.1038/s41586-019-1237-9	NONIBD	11861385	11861385	12	SRR5935820
IBDMDB_nonIBD_PSM7J171	NONIBD	Lloyd-Price_2019	10.1038/s41586-019-1237-9	NONIBD	6190863	6190863	4	SRR5946967
IBDMDB_nonIBD_PSM7J173	NONIBD	Lloyd-Price_2019	10.1038/s41586-019-1237-9	NONIBD	12401339	12401339	13	SRR5950547
IBDMDB_nonIBD_PSM7J17V	NONIBD	Lloyd-Price_2019	10.1038/s41586-019-1237-9	NONIBD	8744666	8744666	9	SRR5935818
IBDMDB_nonIBD_PSM7J17X	NONIBD	Lloyd-Price_2019	10.1038/s41586-019-1237-9	NONIBD	2988837	2988837	3	SRR5935747
IBDMDB_nonIBD_PSM7J17Z	NONIBD	Lloyd-Price_2019	10.1038/s41586-019-1237-9	NONIBD	11607311	11607311	8	SRR5935951
IBDMDB_nonIBD_PSM7J182	NONIBD	Lloyd-Price_2019	10.1038/s41586-019-1237-9	NONIBD	14308730	14308730	8	SRR5935840
IBDMDB_nonIBD_PSM7J184	NONIBD	Lloyd-Price_2019	10.1038/s41586-019-1237-9	NONIBD	12462137	12462137	4	SRR5936169
IBDMDB_nonIBD_PSM7J186	NONIBD	Lloyd-Price_2019	10.1038/s41586-019-1237-9	NONIBD	8939044	8939044	4	SRR5936103
IBDMDB_nonIBD_PSM7J19N	NONIBD	Lloyd-Price_2019	10.1038/s41586-019-1237-9	NONIBD	12122849	12122849	10	SRR5936204
IBDMDB_nonIBD_PSM7J19P	NONIBD	Lloyd-Price_2019	10.1038/s41586-019-1237-9	NONIBD	20063535	20063535	13	SRR5936201
IBDMDB_nonIBD_PSM7J19R	NONIBD	Lloyd-Price_2019	10.1038/s41586-019-1237-9	NONIBD	11019822	11019822	12	SRR5946704
IBDMDB_nonIBD_PSM7J19T	NONIBD	Lloyd-Price_2019	10.1038/s41586-019-1237-9	NONIBD	14249178	14249178	8	SRR5946800
IBDMDB_nonIBD_PSM7J19Z	NONIBD	Lloyd-Price_2019	10.1038/s41586-019-1237-9	NONIBD	3289059	3289059	6	SRR5946647
IBDMDB_nonIBD_PSM7J1A2	NONIBD	Lloyd-Price_2019	10.1038/s41586-019-1237-9	NONIBD	6315077	6315077	10	SRR5935868
IBDMDB_nonIBD_PSM7J1A4	NONIBD	Lloyd-Price_2019	10.1038/s41586-019-1237-9	NONIBD	7196669	7196669	12	SRR5947061
IBDMDB_nonIBD_PSM7J1A6	NONIBD	Lloyd-Price_2019	10.1038/s41586-019-1237-9	NONIBD	6169179	6169179	4	SRR5936021
IBDMDB_nonIBD_PSM7J1A8	NONIBD	Lloyd-Price_2019	10.1038/s41586-019-1237-9	NONIBD	12969729	12969729	7	SRR5935801
IBDMDB_nonIBD_PSM7J1DF	NONIBD	Lloyd-Price_2019	10.1038/s41586-019-1237-9	NONIBD	5924384	5924384	7	SRR5946684
IBDMDB_nonIBD_PSM7J1DL	NONIBD	Lloyd-Price_2019	10.1038/s41586-019-1237-9	NONIBD	9673390	9673390	10	SRR5950511
IBDMDB_nonIBD_PSMA265D	NONIBD	Lloyd-Price_2019	10.1038/s41586-019-1237-9	NONIBD	12105089	12105089	4	SRR5950621
IBDMDB_nonIBD_PSMA265F	NONIBD	Lloyd-Price_2019	10.1038/s41586-019-1237-9	NONIBD	7906505	7906505	4	SRR5946806
IBDMDB_nonIBD_PSMA265H	NONIBD	Lloyd-Price_2019	10.1038/s41586-019-1237-9	NONIBD	6621504	6621504	5	SRR5946896
IBDMDB_nonIBD_PSMA265J	NONIBD	Lloyd-Price_2019	10.1038/s41586-019-1237-9	NONIBD	14948352	14948352	7	SRR5946610
IBDMDB_nonIBD_PSMA265J_TR	NONIBD	Lloyd-Price_2019	10.1038/s41586-019-1237-9	NONIBD	14948352	14948352	7	SRR5962904
IBDMDB_nonIBD_PSMA265L	NONIBD	Lloyd-Price_2019	10.1038/s41586-019-1237-9	NONIBD	12401996	12401996	13	SRR5946676
IBDMDB_UC_CSM5FZ4M	UC	Lloyd-Price_2019	10.1038/s41586-019-1237-9	IBD	14015563	14015563	7	SRR5935761
IBDMDB_UC_CSM5MCUO	UC	Lloyd-Price_2019	10.1038/s41586-019-1237-9	IBD	15593083	15593083	15	SRR5935859
IBDMDB_UC_CSM5MCWQ	UC	Lloyd-Price_2019	10.1038/s41586-019-1237-9	IBD	8852302	8852302	10	SRR5935887
IBDMDB_UC_CSM5MCX3	UC	Lloyd-Price_2019	10.1038/s41586-019-1237-9	IBD	13260601	13260601	10	SRR5935942
IBDMDB_UC_CSM5MCXH	UC	Lloyd-Price_2019	10.1038/s41586-019-1237-9	IBD	12114677	12114677	6	SRR5935863
IBDMDB_UC_CSM5MCXJ	UC	Lloyd-Price_2019	10.1038/s41586-019-1237-9	IBD	10997997	10997997	6	SRR5936080
IBDMDB_UC_CSM5MCXL	UC	Lloyd-Price_2019	10.1038/s41586-019-1237-9	IBD	14140243	14140243	11	SRR5935830
IBDMDB_UC_CSM5MCXN	UC	Lloyd-Price_2019	10.1038/s41586-019-1237-9	IBD	11726536	11726536	9	SRR5935909
IBDMDB_UC_CSM5MCXP	UC	Lloyd-Price_2019	10.1038/s41586-019-1237-9	IBD	13113655	13113655	9	SRR5936224
IBDMDB_UC_CSM5MCXR	UC	Lloyd-Price_2019	10.1038/s41586-019-1237-9	IBD	9693836	9693836	7	SRR5935933
IBDMDB_UC_CSM5MCY4	UC	Lloyd-Price_2019	10.1038/s41586-019-1237-9	IBD	9739777	9739777	9	SRR5936178
IBDMDB_UC_CSM5MCY8	UC	Lloyd-Price_2019	10.1038/s41586-019-1237-9	IBD	16592583	16592583	12	SRR5935919
IBDMDB_UC_CSM67U9H	UC	Lloyd-Price_2019	10.1038/s41586-019-1237-9	IBD	5102922	5102922	2	SRR5935767
IBDMDB_UC_CSM67U9N	UC	Lloyd-Price_2019	10.1038/s41586-019-1237-9	IBD	1190453	1190453	0	SRR5947103
IBDMDB_UC_CSM67UAK	UC	Lloyd-Price_2019	10.1038/s41586-019-1237-9	IBD	8833351	8833351	4	SRR5935931
IBDMDB_UC_CSM67UAM	UC	Lloyd-Price_2019	10.1038/s41586-019-1237-9	IBD	15372931	15372931	6	SRR5935904
IBDMDB_UC_CSM67UAO	UC	Lloyd-Price_2019	10.1038/s41586-019-1237-9	IBD	7880623	7880623	4	SRR5946754
IBDMDB_UC_CSM67UAQ	UC	Lloyd-Price_2019	10.1038/s41586-019-1237-9	IBD	11822407	11822407	6	SRR5946627
IBDMDB_UC_CSM67UAS	UC	Lloyd-Price_2019	10.1038/s41586-019-1237-9	IBD	14044309	14044309	6	SRR5946881
IBDMDB_UC_CSM67UBX	UC	Lloyd-Price_2019	10.1038/s41586-019-1237-9	IBD	13821584	13821584	9	SRR5947100
IBDMDB_UC_CSM67UBZ	UC	Lloyd-Price_2019	10.1038/s41586-019-1237-9	IBD	12732365	12732365	7	SRR5936012
IBDMDB_UC_CSM67UC6	UC	Lloyd-Price_2019	10.1038/s41586-019-1237-9	IBD	15814530	15814530	12	SRR5936217
IBDMDB_UC_CSM67UDF	UC	Lloyd-Price_2019	10.1038/s41586-019-1237-9	IBD	9178709	9178709	6	SRR5935908
IBDMDB_UC_CSM67UDJ	UC	Lloyd-Price_2019	10.1038/s41586-019-1237-9	IBD	11905690	11905690	6	SRR5936009
IBDMDB_UC_CSM67UDN	UC	Lloyd-Price_2019	10.1038/s41586-019-1237-9	IBD	10306569	10306569	5	SRR5936157
IBDMDB_UC_CSM67UDR	UC	Lloyd-Price_2019	10.1038/s41586-019-1237-9	IBD	5009022	5009022	6	SRR5935814
IBDMDB_UC_CSM67UDR_TR	UC	Lloyd-Price_2019	10.1038/s41586-019-1237-9	IBD	7875696	7875696	8	SRR5962888
IBDMDB_UC_CSM67UDY	UC	Lloyd-Price_2019	10.1038/s41586-019-1237-9	IBD	7221860	7221860	3	SRR5936216
IBDMDB_UC_CSM67UE3	UC	Lloyd-Price_2019	10.1038/s41586-019-1237-9	IBD	12742856	12742856	6	SRR5947096
IBDMDB_UC_CSM67UE7	UC	Lloyd-Price_2019	10.1038/s41586-019-1237-9	IBD	9691413	9691413	10	SRR5935999
IBDMDB_UC_CSM67UEA	UC	Lloyd-Price_2019	10.1038/s41586-019-1237-9	IBD	9625351	9625351	10	SRR5936162
IBDMDB_UC_CSM67UEI	UC	Lloyd-Price_2019	10.1038/s41586-019-1237-9	IBD	12178352	12178352	11	SRR5935742
IBDMDB_UC_CSM67UEM	UC	Lloyd-Price_2019	10.1038/s41586-019-1237-9	IBD	9058006	9058006	6	SRR5947088
IBDMDB_UC_CSM67UEW	UC	Lloyd-Price_2019	10.1038/s41586-019-1237-9	IBD	4346983	4346983	4	SRR5935962
IBDMDB_UC_CSM67UEW_TR	UC	Lloyd-Price_2019	10.1038/s41586-019-1237-9	IBD	4194250	4194250	4	SRR5962889
IBDMDB_UC_CSM67UF1	UC	Lloyd-Price_2019	10.1038/s41586-019-1237-9	IBD	6718416	6718416	9	SRR5962886
IBDMDB_UC_CSM67UF5	UC	Lloyd-Price_2019	10.1038/s41586-019-1237-9	IBD	5223107	5223107	7	SRR5936234
IBDMDB_UC_CSM67UFV	UC	Lloyd-Price_2019	10.1038/s41586-019-1237-9	IBD	11631286	11631286	13	SRR5946759
IBDMDB_UC_CSM67UFZ	UC	Lloyd-Price_2019	10.1038/s41586-019-1237-9	IBD	11402190	11402190	10	SRR5936158
IBDMDB_UC_CSM67UG8	UC	Lloyd-Price_2019	10.1038/s41586-019-1237-9	IBD	13475391	13475391	12	SRR5946823
IBDMDB_UC_CSM79HGF	UC	Lloyd-Price_2019	10.1038/s41586-019-1237-9	IBD	3224386	3224386	3	SRR5935959
IBDMDB_UC_CSM79HID	UC	Lloyd-Price_2019	10.1038/s41586-019-1237-9	IBD	14670176	14670176	7	SRR5936030
IBDMDB_UC_CSM79HIF	UC	Lloyd-Price_2019	10.1038/s41586-019-1237-9	IBD	13270917	13270917	4	SRR5946749
IBDMDB_UC_CSM79HIH	UC	Lloyd-Price_2019	10.1038/s41586-019-1237-9	IBD	12342815	12342815	5	SRR5946907
IBDMDB_UC_CSM79HIJ	UC	Lloyd-Price_2019	10.1038/s41586-019-1237-9	IBD	11134117	11134117	8	SRR5946657
IBDMDB_UC_CSM79HIL	UC	Lloyd-Price_2019	10.1038/s41586-019-1237-9	IBD	8934929	8934929	4	SRR5946873
IBDMDB_UC_CSM79HIN	UC	Lloyd-Price_2019	10.1038/s41586-019-1237-9	IBD	11307743	11307743	9	SRR5935792
IBDMDB_UC_CSM79HLA	UC	Lloyd-Price_2019	10.1038/s41586-019-1237-9	IBD	12356641	12356641	15	SRR5936051
IBDMDB_UC_CSM79HLA_TR	UC	Lloyd-Price_2019	10.1038/s41586-019-1237-9	IBD	8311595	8311595	10	SRR5962894
IBDMDB_UC_CSM79HLC	UC	Lloyd-Price_2019	10.1038/s41586-019-1237-9	IBD	13269738	13269738	9	SRR5936176
IBDMDB_UC_CSM79HLE	UC	Lloyd-Price_2019	10.1038/s41586-019-1237-9	IBD	8650981	8650981	4	SRR5935826
IBDMDB_UC_CSM79HLG	UC	Lloyd-Price_2019	10.1038/s41586-019-1237-9	IBD	10534152	10534152	8	SRR5936005
IBDMDB_UC_CSM79HLI	UC	Lloyd-Price_2019	10.1038/s41586-019-1237-9	IBD	10915005	10915005	6	SRR5946938
IBDMDB_UC_CSM79HLK	UC	Lloyd-Price_2019	10.1038/s41586-019-1237-9	IBD	4088179	4088179	2	SRR5946715
IBDMDB_UC_CSM79HLM	UC	Lloyd-Price_2019	10.1038/s41586-019-1237-9	IBD	12488106	12488106	8	SRR5946654
IBDMDB_UC_CSM79HM1	UC	Lloyd-Price_2019	10.1038/s41586-019-1237-9	IBD	11666717	11666717	8	SRR5946875
IBDMDB_UC_CSM79HM7	UC	Lloyd-Price_2019	10.1038/s41586-019-1237-9	IBD	14928219	14928219	13	SRR5947006
IBDMDB_UC_CSM79HMN	UC	Lloyd-Price_2019	10.1038/s41586-019-1237-9	IBD	7553755	7553755	8	SRR5946663
IBDMDB_UC_CSM79HMP	UC	Lloyd-Price_2019	10.1038/s41586-019-1237-9	IBD	8685541	8685541	11	SRR5946872
IBDMDB_UC_CSM79HMT	UC	Lloyd-Price_2019	10.1038/s41586-019-1237-9	IBD	10349461	10349461	11	SRR5936185
IBDMDB_UC_CSM79HNE	UC	Lloyd-Price_2019	10.1038/s41586-019-1237-9	IBD	7024802	7024802	6	SRR5946702
IBDMDB_UC_CSM79HNI	UC	Lloyd-Price_2019	10.1038/s41586-019-1237-9	IBD	14539679	14539679	16	SRR5947055
IBDMDB_UC_CSM79HNK	UC	Lloyd-Price_2019	10.1038/s41586-019-1237-9	IBD	8465202	8465202	9	SRR5946680
IBDMDB_UC_CSM79HNM	UC	Lloyd-Price_2019	10.1038/s41586-019-1237-9	IBD	17639646	17639646	17	SRR5946852
IBDMDB_UC_CSM79HO1	UC	Lloyd-Price_2019	10.1038/s41586-019-1237-9	IBD	9994999	9994999	11	SRR5935979
IBDMDB_UC_CSM79HPK	UC	Lloyd-Price_2019	10.1038/s41586-019-1237-9	IBD	7963059	7963059	4	SRR5936111
IBDMDB_UC_CSM79HPO	UC	Lloyd-Price_2019	10.1038/s41586-019-1237-9	IBD	439626	439626	0	SRR5946799
IBDMDB_UC_CSM79HPS	UC	Lloyd-Price_2019	10.1038/s41586-019-1237-9	IBD	7954612	7954612	7	SRR5935865
IBDMDB_UC_CSM79HPU	UC	Lloyd-Price_2019	10.1038/s41586-019-1237-9	IBD	43408	43408	0	SRR5950762
IBDMDB_UC_CSM7KOJQ	UC	Lloyd-Price_2019	10.1038/s41586-019-1237-9	IBD	13697064	13697064	8	SRR5946943
IBDMDB_UC_CSM7KOJS	UC	Lloyd-Price_2019	10.1038/s41586-019-1237-9	IBD	15003630	15003630	7	SRR5946716
IBDMDB_UC_CSM7KOJU	UC	Lloyd-Price_2019	10.1038/s41586-019-1237-9	IBD	8819232	8819232	5	SRR5946674
IBDMDB_UC_CSM7KOJW	UC	Lloyd-Price_2019	10.1038/s41586-019-1237-9	IBD	7033233	7033233	6	SRR5947102
IBDMDB_UC_CSM7KOJY	UC	Lloyd-Price_2019	10.1038/s41586-019-1237-9	IBD	10795045	10795045	5	SRR5946685
IBDMDB_UC_CSM7KOK1	UC	Lloyd-Price_2019	10.1038/s41586-019-1237-9	IBD	16400705	16400705	8	SRR5950683
IBDMDB_UC_CSM7KOLY	UC	Lloyd-Price_2019	10.1038/s41586-019-1237-9	IBD	19618608	19618608	13	SRR5950679
IBDMDB_UC_CSM7KOMP	UC	Lloyd-Price_2019	10.1038/s41586-019-1237-9	IBD	14778449	14778449	16	SRR5935796
IBDMDB_UC_CSM7KOMT	UC	Lloyd-Price_2019	10.1038/s41586-019-1237-9	IBD	11693178	11693178	13	SRR5935748
IBDMDB_UC_CSM7KONU	UC	Lloyd-Price_2019	10.1038/s41586-019-1237-9	IBD	905680	905680	1	SRR5936190
IBDMDB_UC_CSM7KOP6	UC	Lloyd-Price_2019	10.1038/s41586-019-1237-9	IBD	10851405	10851405	11	SRR5950637
IBDMDB_UC_CSM7KOP8	UC	Lloyd-Price_2019	10.1038/s41586-019-1237-9	IBD	18343998	16040353	12	SRR5946688
IBDMDB_UC_CSM7KOPE	UC	Lloyd-Price_2019	10.1038/s41586-019-1237-9	IBD	15301754	15301754	11	SRR5950770
IBDMDB_UC_CSM7KOPG	UC	Lloyd-Price_2019	10.1038/s41586-019-1237-9	IBD	11595029	11595029	7	SRR5950669
IBDMDB_UC_CSM7KOPI	UC	Lloyd-Price_2019	10.1038/s41586-019-1237-9	IBD	11229762	11229762	8	SRR5935974
IBDMDB_UC_CSM7KOPK	UC	Lloyd-Price_2019	10.1038/s41586-019-1237-9	IBD	8965966	8965966	6	SRR5950484
IBDMDB_UC_CSM7KOPM	UC	Lloyd-Price_2019	10.1038/s41586-019-1237-9	IBD	11056502	11056502	8	SRR5950504
IBDMDB_UC_CSM7KOPO	UC	Lloyd-Price_2019	10.1038/s41586-019-1237-9	IBD	8789770	8789770	7	SRR5950771
IBDMDB_UC_CSM7KORM	UC	Lloyd-Price_2019	10.1038/s41586-019-1237-9	IBD	8455293	8455293	5	SRR5950794
IBDMDB_UC_CSM7KORO	UC	Lloyd-Price_2019	10.1038/s41586-019-1237-9	IBD	3904806	3904806	3	SRR5950523
IBDMDB_UC_CSM7KORS	UC	Lloyd-Price_2019	10.1038/s41586-019-1237-9	IBD	11143369	11143369	6	SRR5950568
IBDMDB_UC_CSM7KORU	UC	Lloyd-Price_2019	10.1038/s41586-019-1237-9	IBD	7680184	7680184	5	SRR5950772
IBDMDB_UC_CSM7KOS7	UC	Lloyd-Price_2019	10.1038/s41586-019-1237-9	IBD	14249858	14249858	18	SRR5947026
IBDMDB_UC_CSM7KOSH	UC	Lloyd-Price_2019	10.1038/s41586-019-1237-9	IBD	13131102	13131102	10	SRR5946980
IBDMDB_UC_CSM7KOU9	UC	Lloyd-Price_2019	10.1038/s41586-019-1237-9	IBD	14112821	14112821	16	SRR5950609
IBDMDB_UC_CSM7KOUB	UC	Lloyd-Price_2019	10.1038/s41586-019-1237-9	IBD	11258561	11258561	12	SRR5946978
IBDMDB_UC_CSM7KOUL	UC	Lloyd-Price_2019	10.1038/s41586-019-1237-9	IBD	7784344	7784344	4	SRR5950650
IBDMDB_UC_CSM7KOUN	UC	Lloyd-Price_2019	10.1038/s41586-019-1237-9	IBD	11042012	11042012	8	SRR5950694
IBDMDB_UC_CSM9X1XU	UC	Lloyd-Price_2019	10.1038/s41586-019-1237-9	IBD	7969132	7969132	5	SRR5950643
IBDMDB_UC_CSM9X1Y3	UC	Lloyd-Price_2019	10.1038/s41586-019-1237-9	IBD	8678844	8678844	9	SRR5950580
IBDMDB_UC_CSM9X1Y5	UC	Lloyd-Price_2019	10.1038/s41586-019-1237-9	IBD	11149336	11149336	17	SRR5950756
IBDMDB_UC_CSM9X1ZO	UC	Lloyd-Price_2019	10.1038/s41586-019-1237-9	IBD	18294262	18294262	13	SRR5950585
IBDMDB_UC_CSM9X1ZQ	UC	Lloyd-Price_2019	10.1038/s41586-019-1237-9	IBD	21091140	21091140	10	SRR5950618
IBDMDB_UC_CSM9X1ZY	UC	Lloyd-Price_2019	10.1038/s41586-019-1237-9	IBD	7331439	7331439	8	SRR5946836
IBDMDB_UC_CSM9X211	UC	Lloyd-Price_2019	10.1038/s41586-019-1237-9	IBD	20108000	20108000	9	SRR5950662
IBDMDB_UC_CSM9X213	UC	Lloyd-Price_2019	10.1038/s41586-019-1237-9	IBD	12045377	12045377	6	SRR5950619
IBDMDB_UC_CSM9X215	UC	Lloyd-Price_2019	10.1038/s41586-019-1237-9	IBD	21796660	21796660	6	SRR5950780
IBDMDB_UC_CSM9X219	UC	Lloyd-Price_2019	10.1038/s41586-019-1237-9	IBD	10342492	10342492	6	SRR5950623
IBDMDB_UC_CSM9X21J	UC	Lloyd-Price_2019	10.1038/s41586-019-1237-9	IBD	10801446	10801446	7	SRR5950788
IBDMDB_UC_CSM9X21L	UC	Lloyd-Price_2019	10.1038/s41586-019-1237-9	IBD	10455165	10455165	7	SRR5950744
IBDMDB_UC_CSM9X21N	UC	Lloyd-Price_2019	10.1038/s41586-019-1237-9	IBD	15003651	15003651	6	SRR5950536
IBDMDB_UC_CSM9X22G	UC	Lloyd-Price_2019	10.1038/s41586-019-1237-9	IBD	16762290	16762290	15	SRR5946843
IBDMDB_UC_CSM9X22I	UC	Lloyd-Price_2019	10.1038/s41586-019-1237-9	IBD	19559121	19559121	20	SRR5950789
IBDMDB_UC_CSM9X22K	UC	Lloyd-Price_2019	10.1038/s41586-019-1237-9	IBD	10869417	10869417	12	SRR5950551
IBDMDB_UC_CSM9X22S	UC	Lloyd-Price_2019	10.1038/s41586-019-1237-9	IBD	9807472	9807472	6	SRR5950514
IBDMDB_UC_CSM9X22U	UC	Lloyd-Price_2019	10.1038/s41586-019-1237-9	IBD	11296417	11296417	7	SRR5950591
IBDMDB_UC_CSM9X23H	UC	Lloyd-Price_2019	10.1038/s41586-019-1237-9	IBD	13308813	13308813	5	SRR5950555
IBDMDB_UC_CSM9X23N	UC	Lloyd-Price_2019	10.1038/s41586-019-1237-9	IBD	10394250	10394250	4	SRR5950710
IBDMDB_UC_ESM5ME9U	UC	Lloyd-Price_2019	10.1038/s41586-019-1237-9	IBD	13537551	13537551	8	SRR5936113
IBDMDB_UC_ESM5MEBS	UC	Lloyd-Price_2019	10.1038/s41586-019-1237-9	IBD	12083989	12083989	8	SRR5935857
IBDMDB_UC_ESM5MEBU	UC	Lloyd-Price_2019	10.1038/s41586-019-1237-9	IBD	11088803	11088803	8	SRR5936083
IBDMDB_UC_ESM5MEC3	UC	Lloyd-Price_2019	10.1038/s41586-019-1237-9	IBD	11287466	11287466	8	SRR5946918
IBDMDB_UC_ESM5MEC5	UC	Lloyd-Price_2019	10.1038/s41586-019-1237-9	IBD	8084982	8084982	6	SRR5935758
IBDMDB_UC_ESM5MEC9	UC	Lloyd-Price_2019	10.1038/s41586-019-1237-9	IBD	15607740	15607740	8	SRR5947091
IBDMDB_UC_ESM5MEDU	UC	Lloyd-Price_2019	10.1038/s41586-019-1237-9	IBD	9441121	9441121	7	SRR5946884
IBDMDB_UC_ESM718SY	UC	Lloyd-Price_2019	10.1038/s41586-019-1237-9	IBD	14904989	14904989	9	SRR5946656
IBDMDB_UC_HSM5MD3Y	UC	Lloyd-Price_2019	10.1038/s41586-019-1237-9	IBD	3028474	3028474	4	SRR5935940
IBDMDB_UC_HSM5MD41	UC	Lloyd-Price_2019	10.1038/s41586-019-1237-9	IBD	13949501	13949501	9	SRR5936039
IBDMDB_UC_HSM5MD43	UC	Lloyd-Price_2019	10.1038/s41586-019-1237-9	IBD	12318776	12318776	4	SRR5935969
IBDMDB_UC_HSM67VGY	UC	Lloyd-Price_2019	10.1038/s41586-019-1237-9	IBD	15099524	15099524	9	SRR5935883
IBDMDB_UC_HSM67VH1	UC	Lloyd-Price_2019	10.1038/s41586-019-1237-9	IBD	10418379	10418379	6	SRR5936142
IBDMDB_UC_HSM6XRR5	UC	Lloyd-Price_2019	10.1038/s41586-019-1237-9	IBD	3359911	3359911	3	SRR5936042
IBDMDB_UC_HSM6XRR7	UC	Lloyd-Price_2019	10.1038/s41586-019-1237-9	IBD	7029361	7029361	8	SRR5935935
IBDMDB_UC_HSM6XRRB	UC	Lloyd-Price_2019	10.1038/s41586-019-1237-9	IBD	15458986	15458986	5	SRR5936161
IBDMDB_UC_HSM6XRRD	UC	Lloyd-Price_2019	10.1038/s41586-019-1237-9	IBD	14363816	14363816	7	SRR5946879
IBDMDB_UC_HSM6XRTM	UC	Lloyd-Price_2019	10.1038/s41586-019-1237-9	IBD	7044188	7044188	6	SRR5935815
IBDMDB_UC_HSM6XRTO	UC	Lloyd-Price_2019	10.1038/s41586-019-1237-9	IBD	17069331	17069331	8	SRR5946613
IBDMDB_UC_HSM6XRTQ	UC	Lloyd-Price_2019	10.1038/s41586-019-1237-9	IBD	2450216	2450216	3	SRR5936211
IBDMDB_UC_HSM6XRTS	UC	Lloyd-Price_2019	10.1038/s41586-019-1237-9	IBD	12232758	12232758	10	SRR5946793
IBDMDB_UC_HSM6XRUX	UC	Lloyd-Price_2019	10.1038/s41586-019-1237-9	IBD	8052724	8052724	8	SRR5947059
IBDMDB_UC_HSM6XRUZ	UC	Lloyd-Price_2019	10.1038/s41586-019-1237-9	IBD	4091199	4091199	6	SRR5947038
IBDMDB_UC_HSM6XRV2	UC	Lloyd-Price_2019	10.1038/s41586-019-1237-9	IBD	3478549	3478549	5	SRR5946824
IBDMDB_UC_HSM6XRV4	UC	Lloyd-Price_2019	10.1038/s41586-019-1237-9	IBD	12675225	12675225	11	SRR5936123
IBDMDB_UC_HSM6XRV6	UC	Lloyd-Price_2019	10.1038/s41586-019-1237-9	IBD	16047970	16047970	12	SRR5935983
IBDMDB_UC_HSM6XRV8	UC	Lloyd-Price_2019	10.1038/s41586-019-1237-9	IBD	13594539	13594539	15	SRR5935785
IBDMDB_UC_HSM7CZ1V	UC	Lloyd-Price_2019	10.1038/s41586-019-1237-9	IBD	19418647	19418647	7	SRR5936110
IBDMDB_UC_HSM7CZ1Z	UC	Lloyd-Price_2019	10.1038/s41586-019-1237-9	IBD	12582747	12582747	7	SRR5935881
IBDMDB_UC_HSM7CZ22	UC	Lloyd-Price_2019	10.1038/s41586-019-1237-9	IBD	7319927	7319927	6	SRR5946858
IBDMDB_UC_HSM7J4GP	UC	Lloyd-Price_2019	10.1038/s41586-019-1237-9	IBD	14075546	14075546	8	SRR5950723
IBDMDB_UC_HSM7J4GR	UC	Lloyd-Price_2019	10.1038/s41586-019-1237-9	IBD	12916120	12916120	5	SRR5935993
IBDMDB_UC_HSM7J4HM	UC	Lloyd-Price_2019	10.1038/s41586-019-1237-9	IBD	10494060	10494060	8	SRR5936022
IBDMDB_UC_HSM7J4HO	UC	Lloyd-Price_2019	10.1038/s41586-019-1237-9	IBD	10076986	10076986	7	SRR5936059
IBDMDB_UC_HSM7J4HQ	UC	Lloyd-Price_2019	10.1038/s41586-019-1237-9	IBD	8936482	8936482	4	SRR5935987
IBDMDB_UC_HSM7J4HS	UC	Lloyd-Price_2019	10.1038/s41586-019-1237-9	IBD	2461463	2461463	3	SRR5935783
IBDMDB_UC_HSM7J4HU	UC	Lloyd-Price_2019	10.1038/s41586-019-1237-9	IBD	2276812	2276812	2	SRR5935956
IBDMDB_UC_HSM7J4JZ	UC	Lloyd-Price_2019	10.1038/s41586-019-1237-9	IBD	1040029	1040029	1	SRR5935839
IBDMDB_UC_HSM7J4K2	UC	Lloyd-Price_2019	10.1038/s41586-019-1237-9	IBD	6926480	6926480	6	SRR5935852
IBDMDB_UC_HSM7J4K4	UC	Lloyd-Price_2019	10.1038/s41586-019-1237-9	IBD	341061	341061	0	SRR5936078
IBDMDB_UC_HSM7J4K6	UC	Lloyd-Price_2019	10.1038/s41586-019-1237-9	IBD	3039736	3039736	4	SRR5935776
IBDMDB_UC_HSM7J4K8	UC	Lloyd-Price_2019	10.1038/s41586-019-1237-9	IBD	2661589	2661589	4	SRR5936144
IBDMDB_UC_HSM7J4KA	UC	Lloyd-Price_2019	10.1038/s41586-019-1237-9	IBD	285478	285478	0	SRR5935821
IBDMDB_UC_HSM7J4M4	UC	Lloyd-Price_2019	10.1038/s41586-019-1237-9	IBD	5657325	5657325	8	SRR5950671
IBDMDB_UC_HSM7J4M6	UC	Lloyd-Price_2019	10.1038/s41586-019-1237-9	IBD	6373843	6373843	7	SRR5950629
IBDMDB_UC_HSM7J4M8	UC	Lloyd-Price_2019	10.1038/s41586-019-1237-9	IBD	11177448	11177448	15	SRR5936094
IBDMDB_UC_HSM7J4MA	UC	Lloyd-Price_2019	10.1038/s41586-019-1237-9	IBD	12874885	12874885	12	SRR5936171
IBDMDB_UC_HSM7J4MC	UC	Lloyd-Price_2019	10.1038/s41586-019-1237-9	IBD	12448718	12448718	16	SRR5936067
IBDMDB_UC_HSM7J4ME	UC	Lloyd-Price_2019	10.1038/s41586-019-1237-9	IBD	12303475	12303475	13	SRR5936027
IBDMDB_UC_HSM7J4NC	UC	Lloyd-Price_2019	10.1038/s41586-019-1237-9	IBD	9347629	9347629	7	SRR5950510
IBDMDB_UC_HSM7J4NE	UC	Lloyd-Price_2019	10.1038/s41586-019-1237-9	IBD	7335575	7335575	4	SRR5936174
IBDMDB_UC_HSM7J4NM	UC	Lloyd-Price_2019	10.1038/s41586-019-1237-9	IBD	13819157	13819157	12	SRR5946976
IBDMDB_UC_HSM7J4NO	UC	Lloyd-Price_2019	10.1038/s41586-019-1237-9	IBD	18840264	18840264	6	SRR5935875
IBDMDB_UC_HSM7J4NS	UC	Lloyd-Price_2019	10.1038/s41586-019-1237-9	IBD	14199589	14199589	11	SRR5935925
IBDMDB_UC_HSM7J4NU	UC	Lloyd-Price_2019	10.1038/s41586-019-1237-9	IBD	15615860	15615860	14	SRR5946964
IBDMDB_UC_HSM7J4PC	UC	Lloyd-Price_2019	10.1038/s41586-019-1237-9	IBD	3456675	3456675	3	SRR5947075
IBDMDB_UC_HSM7J4PE	UC	Lloyd-Price_2019	10.1038/s41586-019-1237-9	IBD	6450634	6450634	8	SRR5947009
IBDMDB_UC_HSM7J4PG	UC	Lloyd-Price_2019	10.1038/s41586-019-1237-9	IBD	11839955	11839955	8	SRR5946649
IBDMDB_UC_HSM7J4PI	UC	Lloyd-Price_2019	10.1038/s41586-019-1237-9	IBD	6252481	6252481	5	SRR5936189
IBDMDB_UC_HSM7J4PK	UC	Lloyd-Price_2019	10.1038/s41586-019-1237-9	IBD	252530	252530	0	SRR5936061
IBDMDB_UC_HSM7J4PM	UC	Lloyd-Price_2019	10.1038/s41586-019-1237-9	IBD	7844781	7844781	7	SRR5936135
IBDMDB_UC_HSMA33IA	UC	Lloyd-Price_2019	10.1038/s41586-019-1237-9	IBD	17027669	17027669	7	SRR5946738
IBDMDB_UC_HSMA33IC	UC	Lloyd-Price_2019	10.1038/s41586-019-1237-9	IBD	14037368	14037368	7	SRR5946809
IBDMDB_UC_HSMA33IO	UC	Lloyd-Price_2019	10.1038/s41586-019-1237-9	IBD	127057	127057	0	SRR5946983
IBDMDB_UC_HSMA33IS	UC	Lloyd-Price_2019	10.1038/s41586-019-1237-9	IBD	1884146	1884146	3	SRR5950743
IBDMDB_UC_HSMA33LB	UC	Lloyd-Price_2019	10.1038/s41586-019-1237-9	IBD	1701982	1701982	2	SRR5947067
IBDMDB_UC_HSMA33LH	UC	Lloyd-Price_2019	10.1038/s41586-019-1237-9	IBD	3719831	3719831	4	SRR5946726
IBDMDB_UC_HSMA33LH_TR	UC	Lloyd-Price_2019	10.1038/s41586-019-1237-9	IBD	7689700	7689700	6	SRR5962907
IBDMDB_UC_HSMA33LJ	UC	Lloyd-Price_2019	10.1038/s41586-019-1237-9	IBD	11020929	11020929	7	SRR5946717
IBDMDB_UC_HSMA33LX	UC	Lloyd-Price_2019	10.1038/s41586-019-1237-9	IBD	15746260	15746260	14	SRR5950574
IBDMDB_UC_HSMA33LZ	UC	Lloyd-Price_2019	10.1038/s41586-019-1237-9	IBD	16568468	16568468	9	SRR5950513
IBDMDB_UC_HSMA33M2	UC	Lloyd-Price_2019	10.1038/s41586-019-1237-9	IBD	9375853	9375853	9	SRR5946830
IBDMDB_UC_HSMA33M8	UC	Lloyd-Price_2019	10.1038/s41586-019-1237-9	IBD	12327645	12327645	6	SRR5946894
IBDMDB_UC_HSMA33MA	UC	Lloyd-Price_2019	10.1038/s41586-019-1237-9	IBD	6150106	6150106	5	SRR5946906
IBDMDB_UC_HSMA33MC	UC	Lloyd-Price_2019	10.1038/s41586-019-1237-9	IBD	2537828	2537828	4	SRR5950695
IBDMDB_UC_HSMA33ME	UC	Lloyd-Price_2019	10.1038/s41586-019-1237-9	IBD	1325167	1325167	1	SRR5947068
IBDMDB_UC_HSMA33MG	UC	Lloyd-Price_2019	10.1038/s41586-019-1237-9	IBD	1047144	1047144	2	SRR5946956
IBDMDB_UC_HSMA33MI	UC	Lloyd-Price_2019	10.1038/s41586-019-1237-9	IBD	484651	484651	0	SRR5950738
IBDMDB_UC_HSMA33MK	UC	Lloyd-Price_2019	10.1038/s41586-019-1237-9	IBD	868741	868741	1	SRR5946718
IBDMDB_UC_HSMA33MX	UC	Lloyd-Price_2019	10.1038/s41586-019-1237-9	IBD	209088	209088	0	SRR5950647
IBDMDB_UC_HSMA33MZ	UC	Lloyd-Price_2019	10.1038/s41586-019-1237-9	IBD	7510690	7510690	3	SRR5946963
IBDMDB_UC_HSMA33N4	UC	Lloyd-Price_2019	10.1038/s41586-019-1237-9	IBD	191144	191144	0	SRR5947054
IBDMDB_UC_HSMA33NW	UC	Lloyd-Price_2019	10.1038/s41586-019-1237-9	IBD	9075343	9075343	7	SRR5950684
IBDMDB_UC_HSMA33O1	UC	Lloyd-Price_2019	10.1038/s41586-019-1237-9	IBD	2707582	2707582	1	SRR5946982
IBDMDB_UC_HSMA33O3	UC	Lloyd-Price_2019	10.1038/s41586-019-1237-9	IBD	1624849	1624849	1	SRR5947083
IBDMDB_UC_HSMA33OD	UC	Lloyd-Price_2019	10.1038/s41586-019-1237-9	IBD	12441256	12441256	9	SRR5946736
IBDMDB_UC_HSMA33OJ	UC	Lloyd-Price_2019	10.1038/s41586-019-1237-9	IBD	15688163	15688163	9	SRR5946675
IBDMDB_UC_HSMA33OL	UC	Lloyd-Price_2019	10.1038/s41586-019-1237-9	IBD	14488507	14488507	7	SRR5950657
IBDMDB_UC_HSMA33OP	UC	Lloyd-Price_2019	10.1038/s41586-019-1237-9	IBD	731279	731279	0	SRR5950751
IBDMDB_UC_HSMA33OR	UC	Lloyd-Price_2019	10.1038/s41586-019-1237-9	IBD	1512635	1512635	2	SRR5946855
IBDMDB_UC_HSMA33OT	UC	Lloyd-Price_2019	10.1038/s41586-019-1237-9	IBD	1033402	1033402	1	SRR5947084
IBDMDB_UC_HSMA33OV	UC	Lloyd-Price_2019	10.1038/s41586-019-1237-9	IBD	12766678	12766678	7	SRR5946739
IBDMDB_UC_HSMA33OX	UC	Lloyd-Price_2019	10.1038/s41586-019-1237-9	IBD	7715008	7715008	5	SRR5950576
IBDMDB_UC_HSMA33OZ	UC	Lloyd-Price_2019	10.1038/s41586-019-1237-9	IBD	16535583	16535583	8	SRR5947016
IBDMDB_UC_HSMA33P6	UC	Lloyd-Price_2019	10.1038/s41586-019-1237-9	IBD	10025668	10025668	9	SRR5946732
IBDMDB_UC_HSMA33RD	UC	Lloyd-Price_2019	10.1038/s41586-019-1237-9	IBD	15009056	15009056	7	SRR5946888
IBDMDB_UC_HSMA33RF	UC	Lloyd-Price_2019	10.1038/s41586-019-1237-9	IBD	7981516	7981516	6	SRR5946898
IBDMDB_UC_HSMA33RR	UC	Lloyd-Price_2019	10.1038/s41586-019-1237-9	IBD	2390053	2390053	3	SRR5950597
IBDMDB_UC_HSMA33RT	UC	Lloyd-Price_2019	10.1038/s41586-019-1237-9	IBD	12489486	12489486	7	SRR5946636
IBDMDB_UC_HSMA33RX	UC	Lloyd-Price_2019	10.1038/s41586-019-1237-9	IBD	18497225	18497225	6	SRR5946705
IBDMDB_UC_HSMA33RX_TR	UC	Lloyd-Price_2019	10.1038/s41586-019-1237-9	IBD	13308743	13308743	6	SRR5962885
IBDMDB_UC_MSM6J2HD	UC	Lloyd-Price_2019	10.1038/s41586-019-1237-9	IBD	6438604	6438604	4	SRR5936182
IBDMDB_UC_MSM6J2HF	UC	Lloyd-Price_2019	10.1038/s41586-019-1237-9	IBD	7596434	7596434	3	SRR5936082
IBDMDB_UC_MSM6J2HH	UC	Lloyd-Price_2019	10.1038/s41586-019-1237-9	IBD	1320896	1320896	1	SRR5935835
IBDMDB_UC_MSM6J2HJ	UC	Lloyd-Price_2019	10.1038/s41586-019-1237-9	IBD	4102825	4102825	4	SRR5935943
IBDMDB_UC_MSM6J2HL	UC	Lloyd-Price_2019	10.1038/s41586-019-1237-9	IBD	8201417	8201417	5	SRR5936219
IBDMDB_UC_MSM6J2OH	UC	Lloyd-Price_2019	10.1038/s41586-019-1237-9	IBD	2807722	2807722	3	SRR5936237
IBDMDB_UC_MSM6J2OJ	UC	Lloyd-Price_2019	10.1038/s41586-019-1237-9	IBD	18360099	18360099	5	SRR5935751
IBDMDB_UC_MSM6J2OL	UC	Lloyd-Price_2019	10.1038/s41586-019-1237-9	IBD	13246484	13246484	5	SRR5935996
IBDMDB_UC_MSM6J2ON	UC	Lloyd-Price_2019	10.1038/s41586-019-1237-9	IBD	9590114	9590114	5	SRR5936153
IBDMDB_UC_MSM6J2OP	UC	Lloyd-Price_2019	10.1038/s41586-019-1237-9	IBD	15782866	15782866	6	SRR5936053
IBDMDB_UC_MSM79H7C	UC	Lloyd-Price_2019	10.1038/s41586-019-1237-9	IBD	16183610	16183610	8	SRR5935741
IBDMDB_UC_MSM79H7E	UC	Lloyd-Price_2019	10.1038/s41586-019-1237-9	IBD	12848657	12848657	7	SRR5935950
IBDMDB_UC_MSM79H7G	UC	Lloyd-Price_2019	10.1038/s41586-019-1237-9	IBD	13540676	13540676	11	SRR5936152
IBDMDB_UC_MSM79H7M	UC	Lloyd-Price_2019	10.1038/s41586-019-1237-9	IBD	9925767	9925767	6	SRR5935782
IBDMDB_UC_MSM79HAJ	UC	Lloyd-Price_2019	10.1038/s41586-019-1237-9	IBD	8886752	8886752	14	SRR5935799
IBDMDB_UC_MSM79HAL	UC	Lloyd-Price_2019	10.1038/s41586-019-1237-9	IBD	9695997	9695997	16	SRR5936140
IBDMDB_UC_MSM79HAN	UC	Lloyd-Price_2019	10.1038/s41586-019-1237-9	IBD	14756040	14756040	18	SRR5950630
IBDMDB_UC_MSM79HAR	UC	Lloyd-Price_2019	10.1038/s41586-019-1237-9	IBD	14299722	14299722	16	SRR5950767
IBDMDB_UC_MSM79HAT	UC	Lloyd-Price_2019	10.1038/s41586-019-1237-9	IBD	9163483	9163483	8	SRR5950732
IBDMDB_UC_MSM79HBZ	UC	Lloyd-Price_2019	10.1038/s41586-019-1237-9	IBD	2510378	2510378	4	SRR5946848
IBDMDB_UC_MSM79HDA	UC	Lloyd-Price_2019	10.1038/s41586-019-1237-9	IBD	5397931	5397931	6	SRR5936026
IBDMDB_UC_MSM79HDC	UC	Lloyd-Price_2019	10.1038/s41586-019-1237-9	IBD	14758223	14758223	7	SRR5935800
IBDMDB_UC_MSM79HDE	UC	Lloyd-Price_2019	10.1038/s41586-019-1237-9	IBD	13088924	13088924	8	SRR5935988
IBDMDB_UC_MSM79HDG	UC	Lloyd-Price_2019	10.1038/s41586-019-1237-9	IBD	6386762	6386762	6	SRR5935750
IBDMDB_UC_MSM79HDG_TR	UC	Lloyd-Price_2019	10.1038/s41586-019-1237-9	IBD	9984456	9984456	7	SRR5962900
IBDMDB_UC_MSM79HDI	UC	Lloyd-Price_2019	10.1038/s41586-019-1237-9	IBD	8876850	8876850	8	SRR5935954
IBDMDB_UC_MSM79HEA	UC	Lloyd-Price_2019	10.1038/s41586-019-1237-9	IBD	16082300	16082300	6	SRR5935787
IBDMDB_UC_MSM79HF3	UC	Lloyd-Price_2019	10.1038/s41586-019-1237-9	IBD	6496181	6496181	8	SRR5946785
IBDMDB_UC_MSM79HF5	UC	Lloyd-Price_2019	10.1038/s41586-019-1237-9	IBD	11432498	11432498	18	SRR5935884
IBDMDB_UC_MSM79HF7	UC	Lloyd-Price_2019	10.1038/s41586-019-1237-9	IBD	15792733	15792733	14	SRR5947011
IBDMDB_UC_MSM79HF9	UC	Lloyd-Price_2019	10.1038/s41586-019-1237-9	IBD	5301305	5301305	5	SRR5936064
IBDMDB_UC_MSM79HF9_TR	UC	Lloyd-Price_2019	10.1038/s41586-019-1237-9	IBD	4936348	4936348	6	SRR5962898
IBDMDB_UC_MSM79HFB	UC	Lloyd-Price_2019	10.1038/s41586-019-1237-9	IBD	22042092	22042092	19	SRR5950758
IBDMDB_UC_MSM9VZEU	UC	Lloyd-Price_2019	10.1038/s41586-019-1237-9	IBD	10848883	10848883	7	SRR5936092
IBDMDB_UC_MSM9VZEW	UC	Lloyd-Price_2019	10.1038/s41586-019-1237-9	IBD	11676192	11676192	10	SRR5936167
IBDMDB_UC_MSM9VZEY	UC	Lloyd-Price_2019	10.1038/s41586-019-1237-9	IBD	15888711	15888711	12	SRR5936199
IBDMDB_UC_MSM9VZF1	UC	Lloyd-Price_2019	10.1038/s41586-019-1237-9	IBD	7980574	7980574	5	SRR5935777
IBDMDB_UC_MSM9VZF3	UC	Lloyd-Price_2019	10.1038/s41586-019-1237-9	IBD	12920349	12920349	11	SRR5935923
IBDMDB_UC_MSM9VZF5	UC	Lloyd-Price_2019	10.1038/s41586-019-1237-9	IBD	4981902	4981902	7	SRR5935898
IBDMDB_UC_MSM9VZIM	UC	Lloyd-Price_2019	10.1038/s41586-019-1237-9	IBD	7270487	7270487	8	SRR5947025
IBDMDB_UC_MSM9VZIO	UC	Lloyd-Price_2019	10.1038/s41586-019-1237-9	IBD	3677626	3677626	4	SRR5950701
IBDMDB_UC_MSM9VZIQ	UC	Lloyd-Price_2019	10.1038/s41586-019-1237-9	IBD	14070575	14070575	11	SRR5946903
IBDMDB_UC_MSM9VZIS	UC	Lloyd-Price_2019	10.1038/s41586-019-1237-9	IBD	11112237	11112237	5	SRR5950785
IBDMDB_UC_MSM9VZIU	UC	Lloyd-Price_2019	10.1038/s41586-019-1237-9	IBD	15427347	15427347	11	SRR5946961
IBDMDB_UC_MSM9VZIW	UC	Lloyd-Price_2019	10.1038/s41586-019-1237-9	IBD	10612796	10612796	7	SRR5950742
IBDMDB_UC_MSM9VZLL	UC	Lloyd-Price_2019	10.1038/s41586-019-1237-9	IBD	14915397	14915397	17	SRR5950532
IBDMDB_UC_MSM9VZLN	UC	Lloyd-Price_2019	10.1038/s41586-019-1237-9	IBD	13443297	13443297	21	SRR5935926
IBDMDB_UC_MSM9VZLP	UC	Lloyd-Price_2019	10.1038/s41586-019-1237-9	IBD	6815430	6815430	9	SRR5935978
IBDMDB_UC_MSM9VZLR	UC	Lloyd-Price_2019	10.1038/s41586-019-1237-9	IBD	7222583	7222583	9	SRR5950736
IBDMDB_UC_MSM9VZLT	UC	Lloyd-Price_2019	10.1038/s41586-019-1237-9	IBD	8601439	8601439	9	SRR5946929
IBDMDB_UC_MSM9VZLV	UC	Lloyd-Price_2019	10.1038/s41586-019-1237-9	IBD	10316321	10316321	13	SRR5947082
IBDMDB_UC_MSM9VZLZ	UC	Lloyd-Price_2019	10.1038/s41586-019-1237-9	IBD	287031	287031	0	SRR5947056
IBDMDB_UC_MSM9VZNR	UC	Lloyd-Price_2019	10.1038/s41586-019-1237-9	IBD	10080712	10080712	7	SRR5950651
IBDMDB_UC_MSM9VZNX	UC	Lloyd-Price_2019	10.1038/s41586-019-1237-9	IBD	17292983	17292983	11	SRR5946862
IBDMDB_UC_MSM9VZNZ	UC	Lloyd-Price_2019	10.1038/s41586-019-1237-9	IBD	10333013	10333013	10	SRR5950792
IBDMDB_UC_MSM9VZO2	UC	Lloyd-Price_2019	10.1038/s41586-019-1237-9	IBD	14190600	14190600	7	SRR5950617
IBDMDB_UC_MSM9VZOS	UC	Lloyd-Price_2019	10.1038/s41586-019-1237-9	IBD	9302787	9302787	5	SRR5946927
IBDMDB_UC_MSM9VZOU	UC	Lloyd-Price_2019	10.1038/s41586-019-1237-9	IBD	3018317	3018317	3	SRR5947080
IBDMDB_UC_MSM9VZOW	UC	Lloyd-Price_2019	10.1038/s41586-019-1237-9	IBD	15827347	15827347	10	SRR5946733
IBDMDB_UC_MSM9VZOY	UC	Lloyd-Price_2019	10.1038/s41586-019-1237-9	IBD	7847693	7847693	7	SRR5946968
IBDMDB_UC_MSM9VZP1	UC	Lloyd-Price_2019	10.1038/s41586-019-1237-9	IBD	10544519	10544519	4	SRR5947021
IBDMDB_UC_MSM9VZP3	UC	Lloyd-Price_2019	10.1038/s41586-019-1237-9	IBD	8342385	8342385	4	SRR5946679
IBDMDB_UC_MSMA267V	UC	Lloyd-Price_2019	10.1038/s41586-019-1237-9	IBD	10840663	10840663	12	SRR5947018
IBDMDB_UC_MSMA267X	UC	Lloyd-Price_2019	10.1038/s41586-019-1237-9	IBD	10442979	10442979	10	SRR5950700
IBDMDB_UC_MSMA2684	UC	Lloyd-Price_2019	10.1038/s41586-019-1237-9	IBD	9964863	9964863	7	SRR5950748
IBDMDB_UC_MSMA2688	UC	Lloyd-Price_2019	10.1038/s41586-019-1237-9	IBD	9552207	9552207	6	SRR5950538
IBDMDB_UC_MSMA26AV	UC	Lloyd-Price_2019	10.1038/s41586-019-1237-9	IBD	8159283	8159283	9	SRR5946722
IBDMDB_UC_MSMA26AX	UC	Lloyd-Price_2019	10.1038/s41586-019-1237-9	IBD	6731384	6731384	6	SRR5947066
IBDMDB_UC_MSMA26AZ	UC	Lloyd-Price_2019	10.1038/s41586-019-1237-9	IBD	11882566	11882566	8	SRR5947071
IBDMDB_UC_MSMA26AZ_TR	UC	Lloyd-Price_2019	10.1038/s41586-019-1237-9	IBD	9593673	9593673	7	SRR5962908
IBDMDB_UC_MSMA26EH	UC	Lloyd-Price_2019	10.1038/s41586-019-1237-9	IBD	388147	388147	0	SRR5946655
IBDMDB_UC_MSMA26EJ	UC	Lloyd-Price_2019	10.1038/s41586-019-1237-9	IBD	8077801	8077801	7	SRR5947064
IBDMDB_UC_MSMA26EL	UC	Lloyd-Price_2019	10.1038/s41586-019-1237-9	IBD	4920453	4920453	6	SRR5947073
IBDMDB_UC_MSMA26EN	UC	Lloyd-Price_2019	10.1038/s41586-019-1237-9	IBD	4743183	4743183	6	SRR5950746
IBDMDB_UC_MSMA26EP	UC	Lloyd-Price_2019	10.1038/s41586-019-1237-9	IBD	300973	300973	0	SRR5946720
IBDMDB_UC_MSMA26ER	UC	Lloyd-Price_2019	10.1038/s41586-019-1237-9	IBD	4991745	4991745	5	SRR5950499
IBDMDB_UC_MSMA26ET	UC	Lloyd-Price_2019	10.1038/s41586-019-1237-9	IBD	7832845	7832845	9	SRR5946962
IBDMDB_UC_MSMA26EZ	UC	Lloyd-Price_2019	10.1038/s41586-019-1237-9	IBD	8661491	8661491	7	SRR5950779
IBDMDB_UC_MSMAPC55	UC	Lloyd-Price_2019	10.1038/s41586-019-1237-9	IBD	13183082	13183082	11	SRR5950599
IBDMDB_UC_MSMAPC57	UC	Lloyd-Price_2019	10.1038/s41586-019-1237-9	IBD	7803277	7803277	5	SRR5950626
IBDMDB_UC_MSMAPC59	UC	Lloyd-Price_2019	10.1038/s41586-019-1237-9	IBD	9761856	9761856	10	SRR5946892
IBDMDB_UC_MSMAPC5B	UC	Lloyd-Price_2019	10.1038/s41586-019-1237-9	IBD	6990007	6990007	4	SRR5950558
IBDMDB_UC_MSMAPC5D	UC	Lloyd-Price_2019	10.1038/s41586-019-1237-9	IBD	10928172	10928172	11	SRR5946630
IBDMDB_UC_MSMAPC5Z	UC	Lloyd-Price_2019	10.1038/s41586-019-1237-9	IBD	10790572	10790572	10	SRR5946832
IBDMDB_UC_MSMAPC64	UC	Lloyd-Price_2019	10.1038/s41586-019-1237-9	IBD	9040176	9040176	10	SRR5946637
IBDMDB_UC_MSMAPC66	UC	Lloyd-Price_2019	10.1038/s41586-019-1237-9	IBD	8863100	8863100	8	SRR5950560
IBDMDB_UC_MSMB4LYH	UC	Lloyd-Price_2019	10.1038/s41586-019-1237-9	IBD	9776640	9776640	10	SRR5946709
IBDMDB_UC_MSMB4LZ4	UC	Lloyd-Price_2019	10.1038/s41586-019-1237-9	IBD	10278285	10278285	9	SRR5946638
IBDMDB_UC_MSMB4LZP	UC	Lloyd-Price_2019	10.1038/s41586-019-1237-9	IBD	8496097	8496097	6	SRR5950705
IBDMDB_UC_MSMB4LZR	UC	Lloyd-Price_2019	10.1038/s41586-019-1237-9	IBD	12103990	12103990	6	SRR5946714
IBDMDB_UC_PSM6XBSE	UC	Lloyd-Price_2019	10.1038/s41586-019-1237-9	IBD	3170115	3170115	5	SRR5935961
IBDMDB_UC_PSM6XBT3	UC	Lloyd-Price_2019	10.1038/s41586-019-1237-9	IBD	4492342	4492342	3	SRR5936057
IBDMDB_UC_PSM6XBT5	UC	Lloyd-Price_2019	10.1038/s41586-019-1237-9	IBD	1751196	1751196	2	SRR5946661
IBDMDB_UC_PSM6XBT7	UC	Lloyd-Price_2019	10.1038/s41586-019-1237-9	IBD	5376068	5376068	4	SRR5946950
IBDMDB_UC_PSM6XBT9	UC	Lloyd-Price_2019	10.1038/s41586-019-1237-9	IBD	1489438	1489438	2	SRR5935789
IBDMDB_UC_PSM6XBTB	UC	Lloyd-Price_2019	10.1038/s41586-019-1237-9	IBD	8764276	8764276	5	SRR5946936
IBDMDB_UC_PSM6XBVI	UC	Lloyd-Price_2019	10.1038/s41586-019-1237-9	IBD	12098827	12098827	11	SRR5936034
IBDMDB_UC_PSM6XBVK	UC	Lloyd-Price_2019	10.1038/s41586-019-1237-9	IBD	11115159	11115159	4	SRR5936047
IBDMDB_UC_PSM6XBVM	UC	Lloyd-Price_2019	10.1038/s41586-019-1237-9	IBD	9926040	9926040	8	SRR5946697
IBDMDB_UC_PSM6XBVO	UC	Lloyd-Price_2019	10.1038/s41586-019-1237-9	IBD	9573054	9573054	6	SRR5946951
IBDMDB_UC_PSM6XBVQ	UC	Lloyd-Price_2019	10.1038/s41586-019-1237-9	IBD	18506846	18542604	6	SRR5946990
IBDMDB_UC_PSM6XBVS	UC	Lloyd-Price_2019	10.1038/s41586-019-1237-9	IBD	13258534	13258534	7	SRR5946939
IBDMDB_UC_PSM7J127	UC	Lloyd-Price_2019	10.1038/s41586-019-1237-9	IBD	14961500	14961500	6	SRR5950505
IBDMDB_UC_PSM7J12B	UC	Lloyd-Price_2019	10.1038/s41586-019-1237-9	IBD	13260583	13260583	6	SRR5950608
IBDMDB_UC_PSM7J12D	UC	Lloyd-Price_2019	10.1038/s41586-019-1237-9	IBD	12067565	12067565	3	SRR5936150
IBDMDB_UC_PSM7J12F	UC	Lloyd-Price_2019	10.1038/s41586-019-1237-9	IBD	5900370	5900370	3	SRR5946977
IBDMDB_UC_PSM7J12V	UC	Lloyd-Price_2019	10.1038/s41586-019-1237-9	IBD	14078769	14078769	8	SRR5950570
IBDMDB_UC_PSM7J12Z	UC	Lloyd-Price_2019	10.1038/s41586-019-1237-9	IBD	5260649	3473209	17	SRR5946975
IBDMDB_UC_PSM7J169	UC	Lloyd-Price_2019	10.1038/s41586-019-1237-9	IBD	9647500	9647500	6	SRR5950724
IBDMDB_UC_PSM7J16B	UC	Lloyd-Price_2019	10.1038/s41586-019-1237-9	IBD	1139018	1139018	2	SRR5950588
IBDMDB_UC_PSM7J16F	UC	Lloyd-Price_2019	10.1038/s41586-019-1237-9	IBD	9682308	9682308	7	SRR5950494
IBDMDB_UC_PSM7J16H	UC	Lloyd-Price_2019	10.1038/s41586-019-1237-9	IBD	228556	228556	0	SRR5950615
IBDMDB_UC_PSM7J18Q	UC	Lloyd-Price_2019	10.1038/s41586-019-1237-9	IBD	12834194	12834194	8	SRR5935775
IBDMDB_UC_PSM7J193	UC	Lloyd-Price_2019	10.1038/s41586-019-1237-9	IBD	12279325	12279325	5	SRR5936093
IBDMDB_UC_PSM7J1AM	UC	Lloyd-Price_2019	10.1038/s41586-019-1237-9	IBD	6961850	6961850	5	SRR5935864
IBDMDB_UC_PSM7J1AO	UC	Lloyd-Price_2019	10.1038/s41586-019-1237-9	IBD	8770944	8770944	4	SRR5950685
IBDMDB_UC_PSM7J1AQ	UC	Lloyd-Price_2019	10.1038/s41586-019-1237-9	IBD	11264653	11264653	5	SRR5950670
IBDMDB_UC_PSM7J1AS	UC	Lloyd-Price_2019	10.1038/s41586-019-1237-9	IBD	12930630	12930630	9	SRR5946796
IBDMDB_UC_PSM7J1AU	UC	Lloyd-Price_2019	10.1038/s41586-019-1237-9	IBD	10462524	10462524	3	SRR5936194
IBDMDB_UC_PSM7J1B7	UC	Lloyd-Price_2019	10.1038/s41586-019-1237-9	IBD	11854389	11854389	5	SRR5946850
IBDMDB_UC_PSM7J1B9	UC	Lloyd-Price_2019	10.1038/s41586-019-1237-9	IBD	11270482	11270482	9	SRR5946643
IBDMDB_UC_PSM7J1BB	UC	Lloyd-Price_2019	10.1038/s41586-019-1237-9	IBD	15971438	15971438	11	SRR5936024
IBDMDB_UC_PSM7J1BD	UC	Lloyd-Price_2019	10.1038/s41586-019-1237-9	IBD	8307773	8307773	8	SRR5950641
IBDMDB_UC_PSM7J1BF	UC	Lloyd-Price_2019	10.1038/s41586-019-1237-9	IBD	12844972	12844972	12	SRR5935994
IBDMDB_UC_PSM7J1BV	UC	Lloyd-Price_2019	10.1038/s41586-019-1237-9	IBD	12330962	12330962	12	SRR5946690
IBDMDB_UC_PSM7J1BX	UC	Lloyd-Price_2019	10.1038/s41586-019-1237-9	IBD	8615226	8615226	10	SRR5946802
IBDMDB_UC_PSM7J1C4	UC	Lloyd-Price_2019	10.1038/s41586-019-1237-9	IBD	10978444	10978444	12	SRR5946687
IBDMDB_UC_PSMA264K	UC	Lloyd-Price_2019	10.1038/s41586-019-1237-9	IBD	14522211	14522211	7	SRR5946838
IBDMDB_UC_PSMA264O	UC	Lloyd-Price_2019	10.1038/s41586-019-1237-9	IBD	11482364	11482364	7	SRR5950495
IBDMDB_UC_PSMA264Q	UC	Lloyd-Price_2019	10.1038/s41586-019-1237-9	IBD	6965988	6965988	7	SRR5950542
IBDMDB_UC_PSMA264S	UC	Lloyd-Price_2019	10.1038/s41586-019-1237-9	IBD	9794137	9794137	6	SRR5947062
IBDMDB_UC_PSMA264U	UC	Lloyd-Price_2019	10.1038/s41586-019-1237-9	IBD	15053740	15053740	8	SRR5946804
IBDMDB_UC_PSMA264W	UC	Lloyd-Price_2019	10.1038/s41586-019-1237-9	IBD	12137326	12137326	8	SRR5946986
IBDMDB_UC_PSMA265X	UC	Lloyd-Price_2019	10.1038/s41586-019-1237-9	IBD	10705019	10705019	7	SRR5946743
IBDMDB_UC_PSMA266U	UC	Lloyd-Price_2019	10.1038/s41586-019-1237-9	IBD	6624999	6624999	6	SRR5946810
IBDMDB_UC_PSMA266Y	UC	Lloyd-Price_2019	10.1038/s41586-019-1237-9	IBD	8696613	8696613	6	SRR5946904
IBDMDB_UC_PSMA2671	UC	Lloyd-Price_2019	10.1038/s41586-019-1237-9	IBD	7666622	7666622	6	SRR5950663
IBDMDB_UC_PSMA2675	UC	Lloyd-Price_2019	10.1038/s41586-019-1237-9	IBD	9833266	9833266	7	SRR5946953
IBDMDB_UC_PSMA267J	UC	Lloyd-Price_2019	10.1038/s41586-019-1237-9	IBD	25529831	25529831	8	SRR5947065
IBDMDB_UC_PSMA267P	UC	Lloyd-Price_2019	10.1038/s41586-019-1237-9	IBD	20703630	20703630	10	SRR5946763
IBDMDB_UC_PSMA267R	UC	Lloyd-Price_2019	10.1038/s41586-019-1237-9	IBD	14584710	14584710	7	SRR5946765
IBDMDB_UC_PSMA269S	UC	Lloyd-Price_2019	10.1038/s41586-019-1237-9	IBD	7664965	7664965	7	SRR5946724
IBDMDB_UC_PSMA269W	UC	Lloyd-Price_2019	10.1038/s41586-019-1237-9	IBD	10062286	10062286	7	SRR5946835
IBDMDB_UC_PSMA26A1	UC	Lloyd-Price_2019	10.1038/s41586-019-1237-9	IBD	12556282	12556282	14	SRR5950554
IBDMDB_UC_PSMA26A3	UC	Lloyd-Price_2019	10.1038/s41586-019-1237-9	IBD	9610566	9610566	5	SRR5946890
IBDMDB_UC_PSMB4MBI	UC	Lloyd-Price_2019	10.1038/s41586-019-1237-9	IBD	16947136	16947136	10	SRR5950712
IBDMDB_UC_PSMB4MBK	UC	Lloyd-Price_2019	10.1038/s41586-019-1237-9	IBD	8485116	8485116	11	SRR5946635
IBDMDB_UC_PSMB4MC1	UC	Lloyd-Price_2019	10.1038/s41586-019-1237-9	IBD	15315342	15315342	11	SRR5950707
IBDMDB_UC_PSMB4MC3	UC	Lloyd-Price_2019	10.1038/s41586-019-1237-9	IBD	7200358	7200358	4	SRR5950709
IBDMDB_UC_PSMB4MC5	UC	Lloyd-Price_2019	10.1038/s41586-019-1237-9	IBD	6796111	6796111	6	SRR5946710
IBDMDB_UC_PSMB4MC7	UC	Lloyd-Price_2019	10.1038/s41586-019-1237-9	IBD	5208663	5208663	6	SRR5946633
G35127_CD	CD	Franzosa_2018	10.1038/s41564-018-0306-4	IBD	7757075	7757075	11	SRR6468596
G35128_CD	CD	Franzosa_2018	10.1038/s41564-018-0306-4	IBD	6724528	6724528	13	SRR6468574
G35152_CD	CD	Franzosa_2018	10.1038/s41564-018-0306-4	IBD	8215195	8215195	9	SRR6468640
G36347_CD	CD	Franzosa_2018	10.1038/s41564-018-0306-4	IBD	9798625	9798625	11	SRR6468672
G36348_CD	CD	Franzosa_2018	10.1038/s41564-018-0306-4	IBD	2423635	2423635	2	SRR6468671
G36349_CD	CD	Franzosa_2018	10.1038/s41564-018-0306-4	IBD	15669658	15669658	20	SRR6468502
G36350_CD	CD	Franzosa_2018	10.1038/s41564-018-0306-4	IBD	14190991	14190991	22	SRR6468676
G36351_CD	CD	Franzosa_2018	10.1038/s41564-018-0306-4	IBD	11015741	11015741	19	SRR6468603
G36352_CD	CD	Franzosa_2018	10.1038/s41564-018-0306-4	IBD	15426233	15426233	25	SRR6468623
G36353_CD	CD	Franzosa_2018	10.1038/s41564-018-0306-4	IBD	11712767	11712767	23	SRR6468560
G36354_CD	CD	Franzosa_2018	10.1038/s41564-018-0306-4	IBD	2053273	2053273	1	SRR6468563
G36355_CD	CD	Franzosa_2018	10.1038/s41564-018-0306-4	IBD	11088410	11088410	13	SRR6468561
G36356_CD	CD	Franzosa_2018	10.1038/s41564-018-0306-4	IBD	13280888	13280888	26	SRR6468584
G36357_CD	CD	Franzosa_2018	10.1038/s41564-018-0306-4	IBD	12491221	12491221	18	SRR6468527
G36358_CD	CD	Franzosa_2018	10.1038/s41564-018-0306-4	IBD	14212778	14212778	23	SRR6468590
G36359_CD	CD	Franzosa_2018	10.1038/s41564-018-0306-4	IBD	7217093	7217093	10	SRR6468595
G36360_CD	CD	Franzosa_2018	10.1038/s41564-018-0306-4	IBD	4644298	4644298	5	SRR6468592
G36361_CD	CD	Franzosa_2018	10.1038/s41564-018-0306-4	IBD	19147565	19147565	11	SRR6468591
G36362_CD	CD	Franzosa_2018	10.1038/s41564-018-0306-4	IBD	11720690	11720690	22	SRR6468571
G36363_CD	CD	Franzosa_2018	10.1038/s41564-018-0306-4	IBD	12196581	12196581	19	SRR6468568
G36365_CD	CD	Franzosa_2018	10.1038/s41564-018-0306-4	IBD	12842936	12842936	17	SRR6468559
G36366_CD	CD	Franzosa_2018	10.1038/s41564-018-0306-4	IBD	11932067	11932067	15	SRR6468610
G36367_CD	CD	Franzosa_2018	10.1038/s41564-018-0306-4	IBD	13347504	13347504	21	SRR6468573
G36368_CD	CD	Franzosa_2018	10.1038/s41564-018-0306-4	IBD	14349622	14349622	23	SRR6468655
G36369_CD	CD	Franzosa_2018	10.1038/s41564-018-0306-4	IBD	13100033	13100033	14	SRR6468652
G36370_CD	CD	Franzosa_2018	10.1038/s41564-018-0306-4	IBD	14299141	14299141	12	SRR6468701
G36371_CD	CD	Franzosa_2018	10.1038/s41564-018-0306-4	IBD	14352168	14352168	23	SRR6468607
G36372_CD	CD	Franzosa_2018	10.1038/s41564-018-0306-4	IBD	13540125	13540125	22	SRR6468526
G36374_CD	CD	Franzosa_2018	10.1038/s41564-018-0306-4	IBD	13163203	13163203	13	SRR6468677
G36375_CD	CD	Franzosa_2018	10.1038/s41564-018-0306-4	IBD	11154527	11154527	21	SRR6468575
G36378_CD	CD	Franzosa_2018	10.1038/s41564-018-0306-4	IBD	13198760	13198760	18	SRR6468601
G36379_CD	CD	Franzosa_2018	10.1038/s41564-018-0306-4	IBD	13553029	13553029	15	SRR6468599
G36380_CD	CD	Franzosa_2018	10.1038/s41564-018-0306-4	IBD	15606300	15606300	24	SRR6468608
G36381_CD	CD	Franzosa_2018	10.1038/s41564-018-0306-4	IBD	12182651	12182651	15	SRR6468602
G36382_CD	CD	Franzosa_2018	10.1038/s41564-018-0306-4	IBD	11493473	11493473	16	SRR6468675
G36383_CD	CD	Franzosa_2018	10.1038/s41564-018-0306-4	IBD	13420179	13420179	5	SRR6468700
G36384_CD	CD	Franzosa_2018	10.1038/s41564-018-0306-4	IBD	8305780	8305780	5	SRR6468692
G36385_CD	CD	Franzosa_2018	10.1038/s41564-018-0306-4	IBD	12343217	12343217	6	SRR6468521
G36386_CD	CD	Franzosa_2018	10.1038/s41564-018-0306-4	IBD	12969450	12969450	11	SRR6468580
G36387_CD	CD	Franzosa_2018	10.1038/s41564-018-0306-4	IBD	14320682	14320682	14	SRR6468583
G36389_CD	CD	Franzosa_2018	10.1038/s41564-018-0306-4	IBD	5333121	5333121	10	SRR6468694
G36390_CD	CD	Franzosa_2018	10.1038/s41564-018-0306-4	IBD	10286330	10286330	13	SRR6468581
G36392_CD	CD	Franzosa_2018	10.1038/s41564-018-0306-4	IBD	12423653	12423653	17	SRR6468520
G36394_CD	CD	Franzosa_2018	10.1038/s41564-018-0306-4	IBD	18728627	18728627	18	SRR6468609
G36395_CD	CD	Franzosa_2018	10.1038/s41564-018-0306-4	IBD	12080849	12080849	21	SRR6468569
G36396_CD	CD	Franzosa_2018	10.1038/s41564-018-0306-4	IBD	10796129	10796129	5	SRR6468638
G48777_CD	CD	Franzosa_2018	10.1038/s41564-018-0306-4	IBD	52217513	52217513	28	SRR6468620
G48780_CD	CD	Franzosa_2018	10.1038/s41564-018-0306-4	IBD	43184869	43184869	41	SRR6468582
G48781_UC	UC	Franzosa_2018	10.1038/s41564-018-0306-4	IBD	22188630	22188630	21	SRR6468693
G48783_Control	NONIBD	Franzosa_2018	10.1038/s41564-018-0306-4	NONIBD	47661584	47661584	53	SRR6468522
G48784_UC	UC	Franzosa_2018	10.1038/s41564-018-0306-4	IBD	51803597	51803597	51	SRR6468635
G48786_CD	CD	Franzosa_2018	10.1038/s41564-018-0306-4	IBD	13694510	13694510	14	SRR6468618
G48787_Control	NONIBD	Franzosa_2018	10.1038/s41564-018-0306-4	NONIBD	51946924	51946924	43	SRR6468695
G48789_Control	NONIBD	Franzosa_2018	10.1038/s41564-018-0306-4	NONIBD	58077497	58077497	97	SRR6468617
G48790_Control	NONIBD	Franzosa_2018	10.1038/s41564-018-0306-4	NONIBD	49491124	49491124	90	SRR6468616
G48791_UC	UC	Franzosa_2018	10.1038/s41564-018-0306-4	IBD	63500783	63500783	74	SRR6468636
G48792_Control	NONIBD	Franzosa_2018	10.1038/s41564-018-0306-4	NONIBD	56728455	56728455	71	SRR6468615
G48793_Control	NONIBD	Franzosa_2018	10.1038/s41564-018-0306-4	NONIBD	50345518	50345518	45	SRR6468614
G48794_UC	UC	Franzosa_2018	10.1038/s41564-018-0306-4	IBD	43979666	43979666	61	SRR6468611
G48795_CD	CD	Franzosa_2018	10.1038/s41564-018-0306-4	IBD	43578683	43578683	38	SRR6468612
G48796_CD	CD	Franzosa_2018	10.1038/s41564-018-0306-4	IBD	48054304	48054304	53	SRR6468579
G48798_Control	NONIBD	Franzosa_2018	10.1038/s41564-018-0306-4	NONIBD	55623086	55623086	57	SRR6468523
G48799_UC	UC	Franzosa_2018	10.1038/s41564-018-0306-4	IBD	42863493	42863493	47	SRR6468605
G48802_UC	UC	Franzosa_2018	10.1038/s41564-018-0306-4	IBD	43665478	43665478	44	SRR6468688
G48804_CD	CD	Franzosa_2018	10.1038/s41564-018-0306-4	IBD	45018252	45018252	12	SRR6468586
G48805_CD	CD	Franzosa_2018	10.1038/s41564-018-0306-4	IBD	45445784	45445784	3	SRR6468629
G48806_CD	CD	Franzosa_2018	10.1038/s41564-018-0306-4	IBD	26911621	26911621	13	SRR6468572
G48807_CD	CD	Franzosa_2018	10.1038/s41564-018-0306-4	IBD	55422264	55422264	60	SRR6468685
G48808_Control	NONIBD	Franzosa_2018	10.1038/s41564-018-0306-4	NONIBD	43025795	43025795	33	SRR6468687
G48810_CD	CD	Franzosa_2018	10.1038/s41564-018-0306-4	IBD	40940291	40940291	32	SRR6468683
G48812_UC	UC	Franzosa_2018	10.1038/s41564-018-0306-4	IBD	51269390	51269390	52	SRR6468691
G48814_UC	UC	Franzosa_2018	10.1038/s41564-018-0306-4	IBD	42292961	42292961	19	SRR6468690
G48815_CD	CD	Franzosa_2018	10.1038/s41564-018-0306-4	IBD	45472695	45472695	32	SRR6468585
G48817_CD	CD	Franzosa_2018	10.1038/s41564-018-0306-4	IBD	35340933	35340933	70	SRR6468682
G48819_CD	CD	Franzosa_2018	10.1038/s41564-018-0306-4	IBD	46916174	46916174	12	SRR6468661
G48820_CD	CD	Franzosa_2018	10.1038/s41564-018-0306-4	IBD	56425999	56425999	12	SRR6468619
G48821_UC	UC	Franzosa_2018	10.1038/s41564-018-0306-4	IBD	43202937	43202937	11	SRR6468664
G48822_UC	UC	Franzosa_2018	10.1038/s41564-018-0306-4	IBD	41069985	41069985	9	SRR6468663
G48823_CD	CD	Franzosa_2018	10.1038/s41564-018-0306-4	IBD	40883067	40883067	40	SRR6468606
G48826_Control	NONIBD	Franzosa_2018	10.1038/s41564-018-0306-4	NONIBD	54919152	54919152	68	SRR6468689
G48827_CD	CD	Franzosa_2018	10.1038/s41564-018-0306-4	IBD	43510065	43510065	31	SRR6468525
G48831_Control	NONIBD	Franzosa_2018	10.1038/s41564-018-0306-4	NONIBD	44045490	44045490	42	SRR6468613
G48832_UC	UC	Franzosa_2018	10.1038/s41564-018-0306-4	IBD	37683143	37683143	33	SRR6468668
G48836_UC	UC	Franzosa_2018	10.1038/s41564-018-0306-4	IBD	35088804	35088804	13	SRR6468654
G48838_CD	CD	Franzosa_2018	10.1038/s41564-018-0306-4	IBD	47828503	47828503	42	SRR6468653
G48839_CD	CD	Franzosa_2018	10.1038/s41564-018-0306-4	IBD	49984621	49984621	38	SRR6468666
G48840_UC	UC	Franzosa_2018	10.1038/s41564-018-0306-4	IBD	17265399	17265399	17	SRR6468630
G48841_CD	CD	Franzosa_2018	10.1038/s41564-018-0306-4	IBD	60036513	60036513	17	SRR6468662
G48842_CD	CD	Franzosa_2018	10.1038/s41564-018-0306-4	IBD	61830495	61830495	32	SRR6468665
G72670_CD	CD	Franzosa_2018	10.1038/s41564-018-0306-4	IBD	13983043	13983043	13	SRR6468507
G72671_CD	CD	Franzosa_2018	10.1038/s41564-018-0306-4	IBD	13786450	13786450	17	SRR6468505
G72672_UC	UC	Franzosa_2018	10.1038/s41564-018-0306-4	IBD	14095959	14095959	19	SRR6468600
G72673_UC	UC	Franzosa_2018	10.1038/s41564-018-0306-4	IBD	13871136	13871136	25	SRR6468632
G72674_UC	UC	Franzosa_2018	10.1038/s41564-018-0306-4	IBD	14082108	14082108	21	SRR6468631
G72675_UC	UC	Franzosa_2018	10.1038/s41564-018-0306-4	IBD	13955741	13955741	20	SRR6468627
G72676_UC	UC	Franzosa_2018	10.1038/s41564-018-0306-4	IBD	12567679	12567679	24	SRR6468658
G72677_UC	UC	Franzosa_2018	10.1038/s41564-018-0306-4	IBD	6134155	6134155	7	SRR6468698
G72678_UC	UC	Franzosa_2018	10.1038/s41564-018-0306-4	IBD	13146271	13146271	19	SRR6468699
G72679_UC	UC	Franzosa_2018	10.1038/s41564-018-0306-4	IBD	7329066	7329066	12	SRR6468696
G72680_UC	UC	Franzosa_2018	10.1038/s41564-018-0306-4	IBD	14808278	14808278	18	SRR6468697
G72681_UC	UC	Franzosa_2018	10.1038/s41564-018-0306-4	IBD	15319610	15319610	24	SRR6468524
G72682_UC	UC	Franzosa_2018	10.1038/s41564-018-0306-4	IBD	13428460	13428460	26	SRR6468530
G72683_UC	UC	Franzosa_2018	10.1038/s41564-018-0306-4	IBD	13760306	13760306	25	SRR6468529
G72684_UC	UC	Franzosa_2018	10.1038/s41564-018-0306-4	IBD	13604546	13604546	26	SRR6468564
G72685_UC	UC	Franzosa_2018	10.1038/s41564-018-0306-4	IBD	11544848	11544848	10	SRR6468624
G72686_UC	UC	Franzosa_2018	10.1038/s41564-018-0306-4	IBD	1739025	1739025	0	SRR6468562
G72687_UC	UC	Franzosa_2018	10.1038/s41564-018-0306-4	IBD	2573539	2573539	0	SRR6468589
G72688_UC	UC	Franzosa_2018	10.1038/s41564-018-0306-4	IBD	12981336	12981336	24	SRR6468588
G72689_UC	UC	Franzosa_2018	10.1038/s41564-018-0306-4	IBD	14049567	14049567	20	SRR6468587
G72690_UC	UC	Franzosa_2018	10.1038/s41564-018-0306-4	IBD	15371101	15371101	27	SRR6468594
G72691_UC	UC	Franzosa_2018	10.1038/s41564-018-0306-4	IBD	10753499	10753499	19	SRR6468593
G72692_UC	UC	Franzosa_2018	10.1038/s41564-018-0306-4	IBD	3681823	3681823	1	SRR6468570
G72693_UC	UC	Franzosa_2018	10.1038/s41564-018-0306-4	IBD	14643626	14643626	33	SRR6468576
G72694_UC	UC	Franzosa_2018	10.1038/s41564-018-0306-4	IBD	14179408	14179408	16	SRR6468637
G72695_UC	UC	Franzosa_2018	10.1038/s41564-018-0306-4	IBD	13457171	13457171	27	SRR6468634
G72696_UC	UC	Franzosa_2018	10.1038/s41564-018-0306-4	IBD	14046299	14046299	22	SRR6468633
G72697_UC	UC	Franzosa_2018	10.1038/s41564-018-0306-4	IBD	12540244	12540244	15	SRR6468684
G72698_UC	UC	Franzosa_2018	10.1038/s41564-018-0306-4	IBD	14661735	14661735	7	SRR6468667
G72699_UC	UC	Franzosa_2018	10.1038/s41564-018-0306-4	IBD	2986512	2986512	2	SRR6468504
G72701_UC	UC	Franzosa_2018	10.1038/s41564-018-0306-4	IBD	13027179	13027179	22	SRR6468506
G72702_UC	UC	Franzosa_2018	10.1038/s41564-018-0306-4	IBD	11046498	11046498	15	SRR6468509
G72703_UC	UC	Franzosa_2018	10.1038/s41564-018-0306-4	IBD	14078174	14078174	28	SRR6468508
G72704_UC	UC	Franzosa_2018	10.1038/s41564-018-0306-4	IBD	14988931	14988931	17	SRR6468511
G72705_UC	UC	Franzosa_2018	10.1038/s41564-018-0306-4	IBD	13881901	13881901	26	SRR6468510
G72706_UC	UC	Franzosa_2018	10.1038/s41564-018-0306-4	IBD	12395711	12395711	28	SRR6468512
G72708_UC	UC	Franzosa_2018	10.1038/s41564-018-0306-4	IBD	5591976	5591976	9	SRR6468704
G72709_UC	UC	Franzosa_2018	10.1038/s41564-018-0306-4	IBD	15296904	15296904	21	SRR6468705
G72710_UC	UC	Franzosa_2018	10.1038/s41564-018-0306-4	IBD	12694908	12694908	26	SRR6468702
G72711_UC	UC	Franzosa_2018	10.1038/s41564-018-0306-4	IBD	9410943	9410943	18	SRR6468703
G72712_UC	UC	Franzosa_2018	10.1038/s41564-018-0306-4	IBD	12997987	12997987	15	SRR6468708
G72713_UC	UC	Franzosa_2018	10.1038/s41564-018-0306-4	IBD	8837210	8837210	10	SRR6468513
G72714_Control	NONIBD	Franzosa_2018	10.1038/s41564-018-0306-4	NONIBD	14084576	14084576	27	SRR6468567
G72715_Control	NONIBD	Franzosa_2018	10.1038/s41564-018-0306-4	NONIBD	14256726	14256726	16	SRR6468639
G72716_Control	NONIBD	Franzosa_2018	10.1038/s41564-018-0306-4	NONIBD	15325952	15325952	22	SRR6468686
G72717_Control	NONIBD	Franzosa_2018	10.1038/s41564-018-0306-4	NONIBD	11297893	11297893	31	SRR6468604
G72718_Control	NONIBD	Franzosa_2018	10.1038/s41564-018-0306-4	NONIBD	14209711	14209711	22	SRR6468628
G72719_Control	NONIBD	Franzosa_2018	10.1038/s41564-018-0306-4	NONIBD	13263457	13263457	23	SRR6468626
G72720_Control	NONIBD	Franzosa_2018	10.1038/s41564-018-0306-4	NONIBD	15124267	15124267	24	SRR6468625
G72721_Control	NONIBD	Franzosa_2018	10.1038/s41564-018-0306-4	NONIBD	11944465	11944465	20	SRR6468680
G72722_Control	NONIBD	Franzosa_2018	10.1038/s41564-018-0306-4	NONIBD	15078891	15078891	22	SRR6468674
G72723_Control	NONIBD	Franzosa_2018	10.1038/s41564-018-0306-4	NONIBD	11849963	11849963	22	SRR6468597
G72724_Control	NONIBD	Franzosa_2018	10.1038/s41564-018-0306-4	NONIBD	15170402	15170402	27	SRR6468598
G72725_Control	NONIBD	Franzosa_2018	10.1038/s41564-018-0306-4	NONIBD	14460170	14460170	29	SRR6468656
G72726_Control	NONIBD	Franzosa_2018	10.1038/s41564-018-0306-4	NONIBD	14397294	14397294	36	SRR6468657
G72727_Control	NONIBD	Franzosa_2018	10.1038/s41564-018-0306-4	NONIBD	15818719	15818719	21	SRR6468659
G72728_Control	NONIBD	Franzosa_2018	10.1038/s41564-018-0306-4	NONIBD	14301056	14301056	20	SRR6468622
G72729_Control	NONIBD	Franzosa_2018	10.1038/s41564-018-0306-4	NONIBD	14728878	14728878	30	SRR6468679
G72730_Control	NONIBD	Franzosa_2018	10.1038/s41564-018-0306-4	NONIBD	15252640	15252640	24	SRR6468681
G72731_Control	NONIBD	Franzosa_2018	10.1038/s41564-018-0306-4	NONIBD	16118004	16118004	30	SRR6468528
G72732_Control	NONIBD	Franzosa_2018	10.1038/s41564-018-0306-4	NONIBD	16650201	16650201	36	SRR6468673
G72733_Control	NONIBD	Franzosa_2018	10.1038/s41564-018-0306-4	NONIBD	14288857	14288857	23	SRR6468660
G72734_Control	NONIBD	Franzosa_2018	10.1038/s41564-018-0306-4	NONIBD	12436525	12436525	34	SRR6468621
G72735_Control	NONIBD	Franzosa_2018	10.1038/s41564-018-0306-4	NONIBD	14026395	14026395	27	SRR6468678
G72736_Control	NONIBD	Franzosa_2018	10.1038/s41564-018-0306-4	NONIBD	11690906	11690906	24	SRR6468709
G72737_Control	NONIBD	Franzosa_2018	10.1038/s41564-018-0306-4	NONIBD	13024019	13024019	20	SRR6468706
G82589_Control	NONIBD	Franzosa_2018	10.1038/s41564-018-0306-4	NONIBD	10797793	10797793	18	SRR6468544
G82627_Control	NONIBD	Franzosa_2018	10.1038/s41564-018-0306-4	NONIBD	14351218	14351218	20	SRR6468503
G82666_Control	NONIBD	Franzosa_2018	10.1038/s41564-018-0306-4	NONIBD	23179850	23179850	21	SRR6468543
G82698_Control	NONIBD	Franzosa_2018	10.1038/s41564-018-0306-4	NONIBD	15482153	15482153	24	SRR6468541
G82708_Control	NONIBD	Franzosa_2018	10.1038/s41564-018-0306-4	NONIBD	17138009	17138009	20	SRR6468547
G82738_Control	NONIBD	Franzosa_2018	10.1038/s41564-018-0306-4	NONIBD	15510534	15510534	20	SRR6468545
G82786_Control	NONIBD	Franzosa_2018	10.1038/s41564-018-0306-4	NONIBD	20934576	20934576	21	SRR6468549
G82952_Control	NONIBD	Franzosa_2018	10.1038/s41564-018-0306-4	NONIBD	15583858	15583858	23	SRR6468644
G83001_Control	NONIBD	Franzosa_2018	10.1038/s41564-018-0306-4	NONIBD	7193300	7193300	8	SRR6468649
G83168_Control	NONIBD	Franzosa_2018	10.1038/s41564-018-0306-4	NONIBD	5584332	5584332	4	SRR6468642
G83192_Control	NONIBD	Franzosa_2018	10.1038/s41564-018-0306-4	NONIBD	16732697	16732697	16	SRR6468643
G83234_Control	NONIBD	Franzosa_2018	10.1038/s41564-018-0306-4	NONIBD	14319848	14319848	22	SRR6468650
G83321_Control	NONIBD	Franzosa_2018	10.1038/s41564-018-0306-4	NONIBD	12249558	12249558	15	SRR6468641
G83327_Control	NONIBD	Franzosa_2018	10.1038/s41564-018-0306-4	NONIBD	7928166	7928166	12	SRR6468548
G83335_Control	NONIBD	Franzosa_2018	10.1038/s41564-018-0306-4	NONIBD	12437821	12437821	17	SRR6468546
G83831_Control	NONIBD	Franzosa_2018	10.1038/s41564-018-0306-4	NONIBD	27089695	27089695	33	SRR6468578
G83885_Control	NONIBD	Franzosa_2018	10.1038/s41564-018-0306-4	NONIBD	15106144	15106144	17	SRR6468647
G83901_Control	NONIBD	Franzosa_2018	10.1038/s41564-018-0306-4	NONIBD	9571521	9571521	15	SRR6468550
G83913_Control	NONIBD	Franzosa_2018	10.1038/s41564-018-0306-4	NONIBD	19206752	19206752	25	SRR6468542
G83955_Control	NONIBD	Franzosa_2018	10.1038/s41564-018-0306-4	NONIBD	11156603	11156603	13	SRR6468646
G84104_Control	NONIBD	Franzosa_2018	10.1038/s41564-018-0306-4	NONIBD	17701474	17701474	27	SRR6468577
G84147_Control	NONIBD	Franzosa_2018	10.1038/s41564-018-0306-4	NONIBD	22496267	22496267	26	SRR6468648
G85089_UC	UC	Franzosa_2018	10.1038/s41564-018-0306-4	IBD	11023624	11023624	13	SRR6468499
G85117_UC	UC	Franzosa_2018	10.1038/s41564-018-0306-4	IBD	11030498	11030498	18	SRR6468533
G85122_CD	CD	Franzosa_2018	10.1038/s41564-018-0306-4	IBD	8866805	8866805	8	SRR6468554
G85127_UC	UC	Franzosa_2018	10.1038/s41564-018-0306-4	IBD	7605408	7605408	14	SRR6468536
G85128_CD	CD	Franzosa_2018	10.1038/s41564-018-0306-4	IBD	5545985	5545985	5	SRR6468711
G85129_UC	UC	Franzosa_2018	10.1038/s41564-018-0306-4	IBD	10068707	10068707	17	SRR6468718
G85136_UC	UC	Franzosa_2018	10.1038/s41564-018-0306-4	IBD	8626266	8626266	8	SRR6468553
G85161_UC	UC	Franzosa_2018	10.1038/s41564-018-0306-4	IBD	11213839	11213839	15	SRR6468500
G85163_CD	CD	Franzosa_2018	10.1038/s41564-018-0306-4	IBD	13137636	13137636	18	SRR6468517
G85165_UC	UC	Franzosa_2018	10.1038/s41564-018-0306-4	IBD	10757103	10757103	17	SRR6468715
G85166_CD	CD	Franzosa_2018	10.1038/s41564-018-0306-4	IBD	3869856	3869856	2	SRR6468551
G85171_UC	UC	Franzosa_2018	10.1038/s41564-018-0306-4	IBD	8553395	8553395	15	SRR6468710
G85180_CD	CD	Franzosa_2018	10.1038/s41564-018-0306-4	IBD	9694119	9694119	11	SRR6468669
G85181_CD	CD	Franzosa_2018	10.1038/s41564-018-0306-4	IBD	11834407	11834407	17	SRR6468651
G85182_UC	UC	Franzosa_2018	10.1038/s41564-018-0306-4	IBD	11134116	11134116	19	SRR6468540
G85185_CD	CD	Franzosa_2018	10.1038/s41564-018-0306-4	IBD	14049268	14049268	16	SRR6468534
G85199_UC	UC	Franzosa_2018	10.1038/s41564-018-0306-4	IBD	9241561	9241561	14	SRR6468532
G85210_CD	CD	Franzosa_2018	10.1038/s41564-018-0306-4	IBD	10160076	10160076	14	SRR6468566
G85213_CD	CD	Franzosa_2018	10.1038/s41564-018-0306-4	IBD	12295166	12295166	18	SRR6468645
G85226_CD	CD	Franzosa_2018	10.1038/s41564-018-0306-4	IBD	10877243	10877243	12	SRR6468713
G85230_CD	CD	Franzosa_2018	10.1038/s41564-018-0306-4	IBD	14235941	14235941	21	SRR6468514
G85245_UC	UC	Franzosa_2018	10.1038/s41564-018-0306-4	IBD	6991600	6991600	8	SRR6468716
G85246_UC	UC	Franzosa_2018	10.1038/s41564-018-0306-4	IBD	5964224	5964224	6	SRR6468538
G85257_UC	UC	Franzosa_2018	10.1038/s41564-018-0306-4	IBD	8312601	8312601	15	SRR6468558
G85291_UC	UC	Franzosa_2018	10.1038/s41564-018-0306-4	IBD	5587500	5587500	10	SRR6468717
G85315_UC	UC	Franzosa_2018	10.1038/s41564-018-0306-4	IBD	4672957	4672957	6	SRR6468501
G85340_UC	UC	Franzosa_2018	10.1038/s41564-018-0306-4	IBD	11270286	11270286	21	SRR6468556
G85342_CD	CD	Franzosa_2018	10.1038/s41564-018-0306-4	IBD	10724305	10724305	14	SRR6468565
G85361_UC	UC	Franzosa_2018	10.1038/s41564-018-0306-4	IBD	9494045	9494045	16	SRR6468714
G85364_UC	UC	Franzosa_2018	10.1038/s41564-018-0306-4	IBD	10437479	10437479	13	SRR6468537
G85369_CD	CD	Franzosa_2018	10.1038/s41564-018-0306-4	IBD	9775095	9775095	16	SRR6468518
[truncated: 894 more rows]

## Sheet: d) Annotation Proportions
sample	number of gene calls	number of KOfam annotations	KOfams per gene call	number of COG annotations	COGs per gene call	number of Pfam annotations	Pfams per gene call
CHR_G01_CD_1	36104	18451	0.511051	26769	0.741441	53758	1.48898
CHR_G01_CD_2	53422	27011	0.505616	40016	0.749055	80840	1.51323
CHR_G01_CD_3	37071	19271	0.51984	28050	0.756656	57294	1.54552
CHR_G01_CD_4	78824	39478	0.500837	57839	0.733774	118207	1.49963
CHR_G01_CD_5	52677	27631	0.524536	39119	0.74262	80965	1.53701
CHR_G03_CD_1	65701	32926	0.501149	48852	0.74355	96846	1.47404
CHR_G03_CD_2	76924	40578	0.527508	57791	0.751274	120266	1.56344
CHR_G03_CD_3	23771	12327	0.518573	17931	0.754322	36847	1.55008
CHR_G03_CD_4	40062	20378	0.508662	29953	0.747666	60982	1.52219
CHR_G03_CD_5	44555	22801	0.51175	33131	0.743598	66398	1.49025
CHR_G05_CD_1	40563	23925	0.589823	31277	0.771072	67016	1.65215
CHR_G05_CD_2	39918	23657	0.59264	31598	0.791573	62681	1.57024
CHR_G05_CD_3	28380	16613	0.585377	22282	0.78513	44905	1.58228
CHR_G05_CD_4	20228	11829	0.584783	15415	0.762062	32298	1.5967
CHR_G05_CD_5	29932	17714	0.591808	23637	0.78969	47746	1.59515
CHR_G06_CD_1	25778	11760	0.456203	18605	0.721739	34812	1.35045
CHR_G06_CD_2	42775	21107	0.493442	31914	0.74609	64016	1.49658
CHR_G06_CD_3	39384	20179	0.512365	29854	0.758024	60758	1.54271
CHR_G06_CD_4	69440	36254	0.522091	51733	0.745003	105352	1.51717
CHR_G06_CD_5	40158	20508	0.510683	29926	0.745206	59761	1.48815
CHR_G08_CD_1	37201	18949	0.509368	27627	0.742641	56593	1.52128
CHR_G08_CD_2	47377	20480	0.432277	33803	0.71349	64038	1.35167
CHR_G08_CD_3	34314	17224	0.501953	25781	0.751326	52932	1.54258
CHR_G08_CD_4	31532	16032	0.508436	23754	0.75333	48991	1.55369
CHR_G08_CD_5	30317	15993	0.527526	22541	0.74351	45197	1.49081
CHR_G09_CD_1	16887	7654	0.453248	11734	0.694854	23215	1.37473
CHR_G09_CD_2	49474	24856	0.502405	36755	0.742915	74917	1.51427
CHR_G09_CD_3	36372	18207	0.500577	26596	0.731222	54351	1.49431
CHR_G09_CD_4	52515	26578	0.506103	38963	0.74194	79902	1.52151
CHR_G09_CD_5	58922	25971	0.440769	41642	0.706731	82517	1.40044
CHR_G10_CD_1	46057	24841	0.539353	34724	0.753935	73578	1.59754
CHR_G10_CD_2	37422	19116	0.510823	27786	0.742504	57333	1.53207
CHR_G10_CD_3	50970	26538	0.520659	37916	0.743889	79099	1.55187
CHR_G10_CD_4	24362	11327	0.464945	17508	0.71866	33881	1.39073
CHR_G10_CD_5	67081	33186	0.494715	49725	0.741268	98468	1.4679
CHR_G11_CD_1	39498	19522	0.494253	29194	0.739126	59891	1.5163
CHR_G11_CD_2	14737	7212	0.48938	11242	0.762842	21902	1.48619
CHR_G11_CD_3	43154	23615	0.547226	33027	0.765329	68730	1.59267
CHR_G11_CD_4	22518	11576	0.514078	17029	0.756239	33877	1.50444
CHR_G11_CD_5	80635	40178	0.49827	58593	0.726645	120944	1.49989
CHR_G12_CD_1	12518	6100	0.487298	8887	0.709938	18779	1.50016
CHR_G12_CD_2	4510	1795	0.398004	3039	0.673836	6297	1.39623
CHR_G12_CD_3	859	232	0.270081	556	0.647264	901	1.04889
CHR_G12_CD_5	56851	29770	0.52365	43177	0.759477	87701	1.54265
CHR_G15_CD_1	81208	39177	0.482428	58952	0.725938	115486	1.4221
CHR_G15_CD_3	27176	13085	0.481491	19632	0.722402	38897	1.4313
CHR_G15_CD_4	30410	14737	0.48461	22300	0.733311	43981	1.44627
CHR_G15_CD_5	104121	50169	0.481834	74856	0.718933	153051	1.46993
CHR_G21_CD_1	44092	23860	0.541141	33250	0.754105	66602	1.51052
CHR_G21_CD_2	34661	17855	0.515132	25806	0.744526	53444	1.54191
CHR_G21_CD_3	9989	4429	0.443388	6667	0.667434	12851	1.28652
CHR_G33_CD_1	5732	2714	0.473482	4217	0.735694	8395	1.46458
CHR_G33_CD_2	43776	21944	0.501279	32778	0.748766	66961	1.52963
CHR_G33_CD_3	49905	24916	0.499269	37043	0.74227	75374	1.51035
CHR_G33_CD_4	53900	28245	0.524026	40178	0.745417	83767	1.55412
CHR_G33_CD_5	42922	21990	0.512325	31774	0.740273	66125	1.54059
CHR_G28_CONTROL_1	51384	25471	0.495699	38645	0.752082	73174	1.42406
CHR_G56_CONTROL_1	72922	34569	0.474054	51358	0.704287	101973	1.39838
CHR_G50_CONTROL_1	37844	17780	0.469823	26591	0.702648	51838	1.36978
CHR_G51_CONTROL_1	44133	20192	0.457526	30733	0.696372	59910	1.35749
CHR_G52_CONTROL_1	74931	36555	0.487849	55039	0.734529	108369	1.44625
CHR_G53_CONTROL_1	81969	40645	0.495858	59872	0.730422	118829	1.44968
CHR_G61_CONTROL_1	75091	36300	0.483413	54371	0.724068	106889	1.42346
CHR_G25_CONTROL_1	69027	35778	0.518319	52316	0.757906	104272	1.5106
CHR_G29_CONTROL_1	37973	16500	0.434519	25882	0.68159	50141	1.32044
CHR_G30_CONTROL_1	43321	20535	0.47402	30542	0.705016	59805	1.38051
CHR_G31_CONTROL_1	67134	31144	0.463908	48737	0.725966	92707	1.38092
CHR_G32_CONTROL_1	58849	26268	0.446363	40654	0.690819	81216	1.38007
CHR_G13_CONTROL_1	81461	37519	0.460576	57219	0.70241	112011	1.37503
n_209_V5_M_118_non_pouchitis_1	105502	54971	0.521042	79461	0.753171	154071	1.46036
n_209_V6_M_229_non_pouchitis_2	68571	34996	0.510362	50638	0.738475	99041	1.44436
n_209_V7_M_348_non_pouchitis_3	59460	29623	0.4982	44517	0.748688	82734	1.39142
n_210_V10_M_720_non_pouchitis_7	138166	64690	0.468205	98803	0.715104	201053	1.45516
n_210_V2_M_19_non_pouchitis_1	29325	13787	0.470145	20831	0.71035	44181	1.5066
n_210_V3_M_33_non_pouchitis_2	701	181	0.258203	368	0.524964	583	0.831669
n_210_V4_M_61_non_pouchitis_3	35089	16769	0.477899	24845	0.708057	52108	1.48502
n_210_V5_M_117_non_pouchitis_4	113794	53936	0.473979	82260	0.722885	167142	1.46881
n_210_V6_M_265_non_pouchitis_5	147621	70402	0.47691	107634	0.729124	212743	1.44114
n_210_V7_M_368_non_pouchitis_6	201079	97670	0.485729	146164	0.726898	294023	1.46223
n_211_V10_M_714_non_pouchitis_4	82339	38930	0.472801	59040	0.717036	118900	1.44403
n_211_V5_M_117_non_pouchitis_1	126036	64458	0.511425	94364	0.748707	184881	1.46689
n_211_V6_M_229_non_pouchitis_2	76569	39026	0.509684	58196	0.760046	112543	1.46982
n_211_V7_M_369_non_pouchitis_3	87650	42082	0.480114	63134	0.720297	129391	1.47622
n_212_V10_M_720_non_pouchitis_4	100964	53032	0.525257	74650	0.739372	153444	1.51979
n_212_V5_M_120_non_pouchitis_1	81207	43592	0.536801	61767	0.760612	121407	1.49503
n_212_V6_M_239_non_pouchitis_2	84461	39735	0.470454	61214	0.724761	118395	1.40177
n_212_V7_M_359_non_pouchitis_3	122610	67383	0.549572	93437	0.762067	181901	1.48357
n_213_V10_M_722_non_pouchitis_4	79860	44069	0.551828	61294	0.767518	121844	1.52572
n_213_V5_M_126_non_pouchitis_1	89514	45881	0.512557	66043	0.737795	131228	1.46601
n_213_V6_M_231_non_pouchitis_2	124671	60748	0.487266	92147	0.739121	177532	1.424
n_213_V7_M_359_non_pouchitis_3	64145	32357	0.504435	47899	0.74673	91991	1.43411
n_216_V10_M_721_non_pouchitis_4	65943	34937	0.529806	50652	0.768118	97673	1.48117
n_216_V5_M_121_non_pouchitis_1	51291	29562	0.576358	39248	0.765202	84377	1.64506
n_216_V6_M_233_non_pouchitis_2	87947	43842	0.498505	64898	0.737922	129426	1.47164
n_216_V7_M_374_non_pouchitis_3	19033	8178	0.429675	13994	0.735249	26799	1.40803
n_217_V10_M_720_non_pouchitis_4	49787	26953	0.541366	37608	0.755378	76317	1.53287
n_217_V5_M_121_non_pouchitis_1	26457	15260	0.576785	20273	0.766262	41065	1.55214
n_217_V6_M_235_non_pouchitis_2	39730	21234	0.534458	30300	0.762648	60207	1.5154
n_217_V7_M_350_non_pouchitis_3	44299	24074	0.543443	34856	0.786835	65373	1.47572
n_423_V5_M_127_non_pouchitis_1	45322	25350	0.559331	34632	0.764132	70571	1.5571
n_423_V6_M_232_non_pouchitis_2	57174	31743	0.5552	43989	0.769388	88728	1.55189
n_423_V7_M_355_non_pouchitis_3	91071	47724	0.524031	67904	0.745616	136664	1.50063
n_427_V5_M_122_non_pouchitis_1	31680	16972	0.535732	24244	0.765278	45545	1.43766
n_427_V6_M_234_non_pouchitis_2	46424	24466	0.527012	34874	0.751206	69705	1.50149
n_427_V7_M_360_non_pouchitis_3	54417	26154	0.480622	38839	0.713729	81470	1.49714
n_503_V5_M_126_non_pouchitis_1	86536	46127	0.533038	65318	0.754807	128031	1.47951
n_503_V6_M_271_non_pouchitis_2	115023	64292	0.558949	87731	0.762726	180137	1.5661
n_503_V7_M_412_non_pouchitis_3	92368	45818	0.496038	68259	0.73899	137972	1.49372
p_200_V10_M_731_without_inflamation_5	65705	36670	0.558101	49383	0.751587	104536	1.59099
p_200_V12_M_282_inflamation_1	102224	53002	0.518489	75557	0.739132	157339	1.53916
p_200_V13_M_352_inflamation_2	43078	21022	0.487999	31491	0.731023	63721	1.4792
p_200_V8_M_492_without_inflamation_3	14234	6725	0.47246	10551	0.741253	20091	1.41148
p_200_V9_M_611_without_inflamation_4	29087	13011	0.447313	20995	0.7218	38581	1.3264
p_202_V10_M_743_without_inflamation_6	54173	28499	0.526074	40494	0.747494	81637	1.50697
p_202_V11_M_301_inflamation_3	40521	22843	0.563732	31326	0.773081	61643	1.52126
p_202_V12_M_329_antibiotic_4	54059	29671	0.548863	41018	0.758764	83791	1.54999
p_202_V5_M_117_without_inflamation_1	40107	19740	0.492183	30091	0.750268	57459	1.43264
p_202_V6_M_238_without_inflamation_2	66169	33045	0.499403	48693	0.735888	97413	1.47218
p_202_V7_M_357_without_inflamation_5	71981	34603	0.480724	53141	0.738264	103942	1.44402
p_204_V10_M_785_without_inflamation_6	43711	22534	0.515522	31736	0.726041	64550	1.47674
p_204_V12_M_462_antibiotic_4	59574	28752	0.482627	42521	0.713751	90866	1.52526
p_204_V5_M_187_without_inflamation_1	101331	47993	0.473626	73515	0.725494	149174	1.47215
p_204_V6_M_308_without_inflamation_2	48481	26438	0.545327	36299	0.748726	74381	1.53423
p_204_V7_M_434_inflamation_3	57886	28464	0.491725	41897	0.723785	87292	1.508
p_204_V9_M_673_without_inflamation_5	61011	31899	0.52284	46159	0.756568	90500	1.48334
p_206_V11_M_482_inflamation_5	75494	39037	0.517087	55967	0.741344	111765	1.48045
p_206_V5_M_118_without_inflamation_1	67930	36662	0.539703	50446	0.742617	103054	1.51706
p_206_V6_M_237_without_inflamation_2	77341	38537	0.498274	57553	0.744146	108058	1.39716
p_206_V7_M_363_without_inflamation_3	24872	14402	0.579045	19187	0.77143	39055	1.57024
p_206_V8_M_474_without_inflamation_4	15470	6998	0.452359	10985	0.710084	22509	1.45501
p_207_V10_M_719_inflamation_7	31308	17927	0.572601	23592	0.753545	50002	1.5971
p_207_V12_M_525_antibiotic_5	39334	20600	0.52372	29635	0.753419	60088	1.52764
p_207_V5_M_124_without_inflamation_1	54998	29995	0.545383	40944	0.744463	86671	1.57589
p_207_V6_M_236_without_inflamation_2	60702	32658	0.538005	45182	0.744325	94457	1.55608
p_207_V7_M_355_without_inflamation_3	72669	39387	0.542006	54437	0.749109	113310	1.55926
p_207_V8_M_482_inflamation_4	45166	25116	0.556082	34512	0.764115	71659	1.58657
p_207_V9_M_601_without_inflamation_6	53924	30203	0.560103	41642	0.772235	83015	1.53948
p_208_V12_M_651_antibiotic_6	96943	48309	0.498324	72321	0.746016	139798	1.44206
p_208_V5_M_119_without_inflamation_1	128228	60252	0.469882	93783	0.731377	175784	1.37087
p_208_V6_M_238_without_inflamation_2	65151	32013	0.491366	48215	0.74005	90249	1.38523
p_208_V7_M_357_without_inflamation_3	60576	30477	0.50312	44846	0.740326	88286	1.45744
p_208_V8_M_482_without_inflamation_4	24268	9532	0.392781	17676	0.728367	30885	1.27266
p_208_V9_M_613_inflamation_5	32219	15559	0.482914	23289	0.722834	48735	1.51262
p_214_V12_M_519_antibiotic_5	66096	32814	0.49646	49041	0.741966	97627	1.47705
p_214_V5_M_119_without_inflamation_1	24935	12980	0.520553	18053	0.724002	37347	1.49777
p_214_V6_M_231_without_inflamation_2	78798	40788	0.517627	59711	0.757773	118614	1.50529
p_214_V7_M_358_without_inflamation_3	62417	31931	0.511575	46163	0.73959	92847	1.48753
p_214_V8_M_484_inflamation_4	51914	27542	0.530531	39003	0.7513	77052	1.48422
p_215_V10_M_717_without_inflamation_3	120929	59883	0.495191	87777	0.725856	179934	1.48793
p_215_V6_M_248_without_inflamation_1	92473	48051	0.519622	68971	0.74585	137800	1.49016
p_215_V7_M_371_without_inflamation_2	79284	37836	0.477221	56074	0.707255	115958	1.46256
p_218_V11_M_301_inflamation_3	31807	15627	0.491307	23619	0.742572	46035	1.44732
p_218_V12_M_331_antibiotic_4	25390	12860	0.506499	18809	0.740803	37065	1.45983
p_218_V5_M_120_without_inflamation_1	2766	1210	0.437455	2066	0.746927	3502	1.26609
p_218_V6_M_238_without_inflamation_2	89439	41835	0.467749	65152	0.728452	121301	1.35624
p_218_V7_M_360_without_inflamation_5	25313	12402	0.489946	19093	0.754276	36965	1.46032
p_219_V11_M_211_inflamation_2	10188	4669	0.458284	7655	0.751374	14400	1.41343
p_219_V12_M_239_antibiotic_3	29000	14567	0.50231	21138	0.728897	44418	1.53166
p_219_V5_M_110_without_inflamation_1	6350	3523	0.554803	5293	0.833543	8439	1.32898
p_500_V5_M_120_without_inflamation_1	95160	46935	0.493222	69007	0.725168	148589	1.56146
p_500_V6_M_260_without_inflamation_2	108238	50859	0.469881	77527	0.716264	156722	1.44794
p_500_V7_M_365_without_inflamation_3	112942	57342	0.507712	83983	0.743594	172761	1.52964
p_502_V5_M_120_without_inflamation_1	102939	55622	0.540339	78068	0.758391	155556	1.51115
p_502_V6_M_234_without_inflamation_2	102434	47738	0.466037	73295	0.715534	149688	1.46131
C3001C10_MGX	32385	14832	0.45799	21952	0.677845	49409	1.52568
C3001C1_MGX	23360	10555	0.451841	15675	0.671019	35691	1.52787
C3001C2_MGX	18824	8223	0.436836	12342	0.655652	28392	1.50829
C3001C3_MGX	29182	13207	0.452574	19579	0.670927	45376	1.55493
C3001C4_MGX	32843	15290	0.465548	21923	0.667509	51300	1.56198
C3001C5_MGX	36166	16434	0.454405	23826	0.658796	54551	1.50835
C3001C7_MGX	29277	12388	0.423131	19163	0.654541	42721	1.4592
C3001C8_MGX	26741	11767	0.440036	17071	0.638383	39030	1.45956
C3001C9_MGX	38004	17443	0.458978	25535	0.671903	55271	1.45435
C3002C1_MGX	28080	12353	0.439922	18640	0.663818	42080	1.49858
C3002C2_MGX	28649	13639	0.476072	19855	0.693043	43787	1.5284
C3002C3_MGX	40593	19125	0.47114	27862	0.686374	61150	1.50642
C3002C4_MGX	43157	20170	0.467363	29826	0.691105	64866	1.50302
C3002C5_MGX	33183	15652	0.471687	22347	0.673447	51391	1.54871
C3002C6_MGX	27556	12706	0.461097	18555	0.673356	42898	1.55676
C3002C7_MGX	29222	14016	0.479639	19681	0.673499	46399	1.58781
C3003C2_MGX	44565	20210	0.453495	30045	0.674184	67183	1.50753
C3003C3_MGX	53727	24719	0.460085	36811	0.685149	80347	1.49547
C3003C5_MGX	41692	18620	0.446608	28548	0.684736	61336	1.47117
C3003C7_MGX	35344	16155	0.457079	24242	0.685887	54064	1.52965
C3004C1_MGX	32968	13866	0.42059	22057	0.669043	48826	1.48101
C3004C3_MGX	58267	25857	0.443767	39544	0.678669	81253	1.39449
C3004C4_MGX	45096	20400	0.452368	30716	0.681125	67373	1.49399
C3004C5_MGX	52290	23803	0.455211	34881	0.667068	77874	1.48927
C3004C6_MGX	35545	15693	0.441497	23277	0.65486	52272	1.47059
C3005C2_MGX	66787	29544	0.442362	44871	0.671852	95088	1.42375
C3005C3_MGX	55892	26252	0.469692	38338	0.68593	82688	1.47942
C3005C5_MGX	55017	25740	0.467855	37061	0.673628	81932	1.48921
C3005C6_MGX	59922	28024	0.467675	40621	0.677898	90133	1.50417
C3006C1_MGX	57661	26323	0.456513	39118	0.678413	84788	1.47046
C3006C2_MGX	69011	30635	0.443915	46558	0.674646	99552	1.44255
C3006C4_MGX	77792	35573	0.457284	52837	0.679209	112799	1.45001
C3007C1_MGX	14123	8047	0.56978	10268	0.727041	22607	1.60072
C3007C2_MGX	22444	12266	0.546516	16034	0.7144	36439	1.62355
C3007C4_MGX	23082	9555	0.413959	15079	0.65328	32686	1.41608
C3008C1_MGX	31973	14496	0.453383	22416	0.701092	45497	1.42298
C3008C3_MGX	19727	8185	0.414914	13085	0.663304	27027	1.37005
C3008C4_MGX	11457	5052	0.440953	7769	0.678101	17126	1.49481
C3009C3_MGX	45309	23827	0.525878	32525	0.717849	68537	1.51266
C3010C1_MGX	57554	24281	0.421882	38245	0.664506	82260	1.42927
C3010C4_MGX	32788	13608	0.41503	21713	0.662224	45456	1.38636
C3010C5_MGX	30585	11863	0.38787	19738	0.645349	41295	1.35017
C3011C10_MGX	54395	25238	0.463976	37616	0.691534	78390	1.44113
C3011C16_MGX	22621	9815	0.433889	15184	0.671235	30208	1.3354
C3011C18_MGX	6251	2504	0.400576	4296	0.68725	8713	1.39386
C3011C1_MGX	37891	16398	0.432768	25160	0.66401	53112	1.4017
C3011C20_MGX	34505	14695	0.42588	22642	0.656195	47078	1.36438
C3011C22_MGX	21762	9082	0.417333	14014	0.643967	27949	1.2843
C3011C24_MGX	32605	12987	0.398313	21473	0.65858	43471	1.33326
C3011C2_MGX	13456	5486	0.407699	8560	0.636147	17602	1.30812
C3011C4_MGX	56030	24954	0.445369	38348	0.684419	79359	1.41637
C3011C5_MGX	29280	12410	0.423839	19280	0.65847	40081	1.36889
C3011C6_MGX	40482	18350	0.453288	27538	0.680253	57671	1.42461
C3011C7_MGX	11262	4543	0.403392	7325	0.650417	14222	1.26283
C3011C8_MGX	8017	3221	0.401771	5491	0.68492	10029	1.25097
C3011C9_MGX	40115	17516	0.436645	28038	0.698941	53284	1.32828
C3012C1_MGX	17027	7019	0.412228	11518	0.676455	23166	1.36055
C3013C10_MGX	4838	1708	0.353038	3191	0.65957	5935	1.22675
C3013C11_MGX	8412	2871	0.341298	5447	0.647527	10324	1.22729
C3013C12_MGX	19330	7790	0.403001	12730	0.658562	26059	1.34811
C3013C14_MGX	7064	2989	0.423131	4543	0.64312	9074	1.28454
C3013C17_MGX	16031	6816	0.425176	10521	0.656291	20968	1.30797
C3013C1_MGX	15233	6990	0.458872	10295	0.675835	20744	1.36178
C3013C20_MGX	9516	3508	0.368642	6045	0.635246	11536	1.21227
C3013C22_MGX	40286	18213	0.452093	27183	0.674751	56306	1.39766
C3013C2_MGX	34400	15350	0.446221	23633	0.687006	48507	1.41009
C3013C5_MGX	1223	322	0.263287	706	0.577269	1284	1.04988
C3013C6_MGX	18835	7550	0.400849	12376	0.657075	26427	1.40308
C3013C7_MGX	20132	7118	0.353566	13562	0.673654	24884	1.23604
C3013C8_MGX	29613	12049	0.406882	20439	0.690204	39532	1.33495
C3013C9_MGX	7942	3137	0.394989	5408	0.680937	10854	1.36666
C3015C1_MGX	38495	17263	0.448448	25868	0.671983	60211	1.56413
C3016C1_MGX	28237	12292	0.435315	18917	0.669937	42390	1.50122
C3017C10_MGX	65854	30358	0.460989	45201	0.686382	99636	1.51298
C3017C12_MGX	42032	18869	0.44892	28768	0.684431	61139	1.45458
C3017C14_MGX	42371	18337	0.432772	28684	0.676972	62555	1.47636
C3017C16_MGX	45377	19632	0.432642	30431	0.670626	67207	1.48108
C3017C18_MGX	21310	8692	0.407884	13783	0.646786	29803	1.39855
C3017C1_MGX	33527	14089	0.420228	22318	0.665672	46914	1.39929
C3017C20_MGX	34446	15067	0.437409	23088	0.670267	50428	1.46397
C3017C22_MGX	33901	14384	0.424294	22697	0.669508	49377	1.45651
C3017C24_MGX	44940	19753	0.439542	30532	0.679395	66759	1.48551
C3017C2_MGX	26619	11480	0.431271	17616	0.661783	38737	1.45524
C3017C3_MGX	36222	15349	0.423748	24553	0.677848	53118	1.46646
C3017C4_MGX	27971	13077	0.46752	18790	0.671767	43179	1.54371
C3017C7_MGX	25851	11781	0.455727	17300	0.66922	37979	1.46915
C3017C8_MGX	28828	12375	0.42927	19109	0.662862	42324	1.46816
C3017C9_MGX	29661	12874	0.434038	19823	0.668319	41727	1.4068
C3019C2_MGX	27249	11041	0.405189	17999	0.660538	37936	1.3922
C3020C1_MGX	21814	12147	0.556844	16388	0.751261	32552	1.49225
C3022C2_MGX	37907	16255	0.428813	25344	0.668584	53910	1.42216
C3022C3_MGX	64998	29535	0.454399	44138	0.679067	97027	1.49277
C3023C2_MGX	50002	21189	0.423763	32663	0.653234	69934	1.39862
C3024C1_MGX	10468	3998	0.381926	6721	0.642052	14030	1.34028
C3027C1_MGX	22703	9736	0.428842	14912	0.656829	33661	1.48267
C3029C3_MGX	11152	4667	0.41849	7456	0.66858	15992	1.434
C3030C1_MGX	45298	21168	0.467305	31388	0.692922	66017	1.45739
C3031C1_MGX	18552	7521	0.405401	12520	0.67486	26633	1.43559
C3032C7_MGX	48494	20260	0.417784	31748	0.654679	70010	1.44368
C3033C3_MGX	3753	2216	0.590461	3128	0.833467	5393	1.43698
C3034C1_MGX	4493	1775	0.395059	3081	0.685733	5498	1.22368
C3036C1_MGX	16274	7444	0.457417	11396	0.700258	22775	1.39947
C3037C2_MGX	25546	11838	0.463399	17437	0.682573	41631	1.62965
E5001C1_MGX	24716	10156	0.410908	16086	0.650833	35800	1.44845
E5001C2_MGX	41413	18536	0.447589	28258	0.682346	61053	1.47425
E5001C3_MGX	20874	8464	0.405481	13490	0.646259	29507	1.41358
E5001C4_MGX	46919	21135	0.450457	32094	0.68403	67522	1.43912
E5001C7_MGX	33680	15030	0.446259	22801	0.676989	50255	1.49213
E5001C8_MGX	12296	4784	0.38907	8068	0.656148	17147	1.39452
E5001C9_MGX	7271	2803	0.385504	4591	0.631412	9854	1.35525
E5002C2_MGX	39817	20427	0.513022	28334	0.711606	60066	1.50855
E5002C3_MGX	42823	21316	0.49777	30277	0.707027	64222	1.49971
E5002C4_MGX	27681	13328	0.481485	18932	0.683935	41969	1.51617
E5002C5_MGX	15778	6934	0.439473	10764	0.682216	22046	1.39726
E5002C6_MGX	31056	15195	0.489277	21624	0.696291	46977	1.51265
E5003C2_MGX	54890	21492	0.391547	35779	0.651831	70822	1.29025
E5004C2_MGX	41702	18691	0.448204	28375	0.680423	62956	1.50966
E5004C3_MGX	50242	23062	0.459018	34653	0.689722	75869	1.51007
E5004C4_MGX	52382	22040	0.420755	36125	0.689645	71104	1.35741
E5004C6_MGX	51739	23785	0.459711	35735	0.690678	77504	1.49798
E5006C1_MGX	64105	29988	0.467795	44311	0.691225	96276	1.50185
E5006C2_MGX	41500	16068	0.387181	26257	0.632699	53015	1.27747
E5008C2_MGX	19149	8308	0.433861	12651	0.660661	27013	1.41067
E5008C3_MGX	16300	7437	0.456258	11216	0.688098	22290	1.36748
E5008C4_MGX	29935	13977	0.466912	20194	0.674595	45054	1.50506
E5009C3_MGX	25999	10687	0.411054	17021	0.654679	35834	1.37828
E5013C1_MGX	28755	12879	0.447887	19807	0.688819	42147	1.46573
E5019C1_MGX	35094	13777	0.392574	22675	0.646122	47616	1.35681
E5022C2_MGX	42460	18049	0.425082	27428	0.645973	61005	1.43676
E5023C2_MGX	6276	2268	0.361377	4131	0.658222	7294	1.16221
H4001C10_MGX	31049	13972	0.449998	20557	0.662083	46630	1.50182
H4001C4_MGX	4709	1641	0.348482	2839	0.602888	5619	1.19325
H4001C5_MGX	29713	13515	0.454851	19603	0.659745	45450	1.52963
H4001C6_MGX	30925	13878	0.448763	20821	0.673274	45597	1.47444
H4001C7_MGX	17940	7394	0.412152	11851	0.660591	24915	1.3888
H4001C8_MGX	17174	6766	0.393968	11041	0.64289	23349	1.35956
H4001C9_MGX	5780	2270	0.392734	3549	0.614014	7637	1.32128
H4004C2_MGX	14173	5853	0.412968	9745	0.687575	18323	1.29281
H4004C3_MGX	15968	6934	0.434243	10843	0.679046	21729	1.36078
H4006C3_MGX	26929	13501	0.501355	19013	0.706042	40151	1.49099
H4006C4_MGX	31968	14597	0.456613	21799	0.681901	45170	1.41298
H4006C5_MGX	42237	21268	0.50354	30284	0.717002	63584	1.50541
H4007C1_MGX	43863	18602	0.424093	29179	0.66523	64075	1.4608
H4007C4_MGX	41339	17427	0.421563	27791	0.672271	59320	1.43496
H4008C10_MGX	38582	18036	0.467472	26382	0.68379	57029	1.47812
H4008C11_MGX	32205	13500	0.41919	21688	0.673436	44125	1.37013
H4008C13_MGX	43573	18981	0.435614	29458	0.676061	59731	1.37083
H4008C15_MGX	37992	17547	0.46186	25334	0.666825	54914	1.44541
H4008C17_MGX	40645	17516	0.430951	27589	0.67878	57873	1.42387
H4008C19_MGX	30782	12133	0.394159	20330	0.660451	41664	1.35352
H4008C1_MGX	54685	24708	0.451824	37255	0.681265	80533	1.47267
H4008C21_MGX	17105	6983	0.408243	11190	0.654195	23008	1.3451
H4008C22_MGX	23746	10365	0.436495	16166	0.680788	33118	1.39468
H4008C2_MGX	39098	17555	0.449	25984	0.664586	54423	1.39196
H4008C3_MGX	54218	23987	0.442418	36968	0.68184	75879	1.39952
H4008C4_MGX	50149	22965	0.457935	34404	0.686036	70493	1.40567
H4008C5_MGX	58509	25720	0.43959	39717	0.678819	82019	1.40182
H4008C6_MGX	42944	21220	0.494132	30241	0.704196	61227	1.42574
H4008C7_MGX	58743	27032	0.460174	40568	0.690601	81955	1.39514
H4008C8_MGX	25380	11881	0.468125	16807	0.662214	33906	1.33593
H4008C9_MGX	29034	11886	0.409382	19010	0.65475	39974	1.3768
H4009C10_MGX	44122	19362	0.438829	29223	0.662323	64044	1.45152
H4009C11_MGX	26602	11228	0.422074	17602	0.66168	37587	1.41294
H4009C13_MGX	34026	12925	0.379857	22253	0.654	45606	1.34033
H4009C16_MGX	38268	15723	0.410865	25780	0.67367	50808	1.32769
H4009C18_MGX	4290	1570	0.365967	2504	0.583683	5337	1.24406
H4009C1_MGX	42854	19412	0.45298	28957	0.675713	64131	1.4965
H4009C20_MGX	35730	15494	0.433641	24365	0.68192	53074	1.48542
H4009C22_MGX	9557	4282	0.448049	6681	0.699069	13169	1.37794
H4009C2_MGX	22755	9761	0.428961	15020	0.660075	31460	1.38255
H4009C3_MGX	57181	26135	0.457057	38212	0.668264	86210	1.50767
H4009C4_MGX	27685	12195	0.440491	18380	0.663897	39408	1.42344
H4009C5_MGX	43325	19071	0.440185	28778	0.664235	62001	1.43107
H4009C6_MGX	12759	5177	0.405753	8282	0.64911	16899	1.32448
H4009C8_MGX	23924	10068	0.420833	15619	0.652859	33066	1.38213
H4009C9_MGX	16479	6875	0.417198	10689	0.648644	21779	1.32162
H4010C1_MGX	51432	23884	0.46438	35577	0.691729	76791	1.49306
H4010C2_MGX	675	68	0.100741	97	0.143704	193	0.285926
H4010C3_MGX	1247	519	0.416199	902	0.723336	1369	1.09783
H4010C4_MGX	36791	16204	0.440434	24648	0.669946	54450	1.47998
H4011C1_MGX	35043	13517	0.385726	22310	0.636646	45480	1.29783
H4012C1_MGX	33360	15350	0.460132	23224	0.696163	49352	1.47938
H4013C1_MGX	24945	10969	0.439727	16773	0.672399	35669	1.42991
H4013C2_MGX	46437	20162	0.43418	31533	0.679049	64946	1.39858
H4013C4_MGX	34211	15079	0.440765	23102	0.67528	49276	1.44036
H4013C5_MGX	39737	17348	0.43657	26979	0.678939	56649	1.4256
H4014C1_MGX	16319	5610	0.343771	10115	0.61983	19624	1.20252
H4015C1_MGX	44448	20292	0.456533	30651	0.689592	65189	1.46664
H4016C1_MGX	803	250	0.311333	526	0.655044	1011	1.25903
H4016C2_MGX	24597	11280	0.458593	16732	0.680246	38107	1.54925
H4016C4_MGX	31831	14396	0.452264	21753	0.68339	47489	1.49191
H4016C5_MGX	41387	18945	0.457752	28080	0.678474	62970	1.52149
H4017C1_MGX	61871	28861	0.466471	43622	0.705048	92764	1.49931
H4018C1_MGX	5878	2523	0.429228	3825	0.650732	8883	1.51123
H4019C1_MGX	87	4	0.045977	4	0.045977	12	0.137931
H4020C2_MGX	25132	10806	0.42997	16665	0.663099	37790	1.50366
H4022C1_MGX	44529	21090	0.473624	31417	0.70554	67599	1.51809
H4023C1_MGX	35564	15684	0.441008	24319	0.683809	51151	1.43828
H4024C1_MGX	44284	18905	0.426904	29574	0.667826	65140	1.47096
H4027C2_MGX	29755	12830	0.431188	20023	0.672929	43288	1.45481
H4028C5_MGX	36395	15011	0.412447	23114	0.635087	47708	1.31084
H4030C1_MGX	21169	9034	0.426756	13934	0.658227	30443	1.43809
H4031C1_MGX	35825	15669	0.437376	24095	0.672575	52952	1.47807
H4032C3_MGX	36212	15936	0.440075	25019	0.690904	51843	1.43165
H4035C1_MGX	19497	8987	0.460943	13658	0.700518	29331	1.50439
H4038C11_MGX	27591	12155	0.440542	18869	0.683882	42720	1.54833
H4040C1_MGX	34124	14922	0.437288	23238	0.680987	48899	1.43298
H4042C1_MGX	8861	3500	0.394989	5638	0.636271	11753	1.32637
H4044C2_MGX	44117	18734	0.424644	29902	0.677789	61345	1.39051
H4045C2_MGX	26533	11019	0.415294	16979	0.63992	34879	1.31455
M2008C10_MGX	36101	16719	0.463117	24287	0.672751	56227	1.55749
M2008C11_MGX	46178	20965	0.454004	31363	0.679176	70242	1.52111
M2008C12_MGX	43675	19128	0.437962	29181	0.66814	64353	1.47345
M2008C13_MGX	30907	13573	0.439156	21213	0.686349	44438	1.4378
M2008C14_MGX	32035	14383	0.448978	21714	0.677821	48060	1.50023
M2008C16_MGX	24890	10510	0.422258	16863	0.677501	34934	1.40354
M2008C8_MGX	41215	18695	0.453597	28038	0.680286	60603	1.47041
M2010C11_MGX	10554	5038	0.477355	7785	0.737635	15016	1.42278
M2010C4_MGX	49895	26472	0.530554	37305	0.74767	75117	1.5055
M2010C8_MGX	60037	30325	0.505105	44166	0.735646	89501	1.49076
M2014C10_MGX	34681	16901	0.487327	24520	0.707015	52056	1.50099
M2014C11_MGX	33043	15291	0.462761	22890	0.692734	47833	1.4476
M2014C12_MGX	40577	19686	0.485152	28509	0.70259	60312	1.48636
M2014C3_MGX	48248	22860	0.473802	34230	0.709459	67703	1.40323
M2014C5_MGX	55717	25957	0.465872	39125	0.702209	77178	1.38518
M2014C6_MGX	58198	27395	0.470721	40686	0.699096	81714	1.40407
M2014C7_MGX	9454	3455	0.365454	6263	0.662471	10895	1.15242
M2014C8_MGX	50738	23884	0.470732	35116	0.692105	71824	1.41559
M2014C9_MGX	36095	16872	0.467433	25281	0.700402	52037	1.44167
M2021C1_MGX	52349	23165	0.442511	35852	0.684865	76177	1.45518
M2021C2_MGX	48046	20681	0.430442	32468	0.675769	69705	1.4508
M2021C3_MGX	15849	6464	0.407849	10489	0.661808	22072	1.39264
M2021C5_MGX	38883	17141	0.440835	26160	0.672788	58574	1.50642
M2021C6_MGX	55421	24916	0.449577	38368	0.692301	83252	1.50217
M2024C1_MGX	18631	8125	0.436101	12457	0.668617	26549	1.42499
M2025C1_MGX	60148	24980	0.415309	38605	0.641833	78642	1.30747
M2025C2_MGX	34	6	0.176471	8	0.235294	11	0.323529
M2025C3_MGX	51104	21271	0.41623	33778	0.660966	70972	1.38878
M2025C4_MGX	59109	25359	0.429021	38996	0.65973	84962	1.43738
M2025C7_MGX	59215	25873	0.436933	39333	0.66424	84627	1.42915
M2026C1_MGX	460	46	0.1	12	0.026087	40	0.0869565
M2026C2_MGX	4404	1738	0.394641	2903	0.659173	5918	1.34378
M2026C3_MGX	10204	4377	0.428949	6961	0.682183	15373	1.50657
M2026C4_MGX	16547	7942	0.479966	11504	0.695232	26181	1.58222
M2026C7_MGX	12397	5541	0.446963	8579	0.692022	18912	1.52553
M2027C1_MGX	19805	8813	0.444989	13338	0.673466	27687	1.39798
M2027C2_MGX	30132	13414	0.445175	21010	0.697265	41679	1.38321
M2027C3_MGX	30030	13227	0.44046	19736	0.657209	41931	1.3963
M2027C5_MGX	24208	10704	0.442168	16209	0.669572	34295	1.41668
M2027C6_MGX	22492	9593	0.426507	14629	0.650409	30969	1.37689
M2028C1_MGX	42551	17739	0.416888	27735	0.651806	60080	1.41195
M2028C2_MGX	38846	17129	0.440946	25470	0.655666	58359	1.50232
M2028C4_MGX	44802	19689	0.439467	30016	0.66997	66299	1.47982
M2034C4_MGX	31024	13508	0.435405	22099	0.712319	40250	1.29738
M2039C1_MGX	73941	33113	0.44783	50969	0.68932	105054	1.42078
M2041C1_MGX	44594	18471	0.414204	30060	0.674082	63882	1.43252
M2042C1_MGX	17332	6175	0.356277	10252	0.591507	20145	1.1623
M2047C2_MGX	30749	13436	0.436957	20390	0.663111	40923	1.33087
M2048C5_MGX	68239	29868	0.437697	46068	0.675098	94740	1.38836
M2058C1_MGX	34825	15709	0.451084	23145	0.664609	52542	1.50874
M2059C1_MGX	3693	1538	0.416464	2150	0.582183	4971	1.34606
M2060C2_MGX	23232	9796	0.42166	15553	0.669465	32388	1.39411
M2064C1_MGX	22013	8420	0.382501	13964	0.634352	27188	1.23509
M2067C6_MGX	26811	11454	0.427213	17666	0.658909	35188	1.31245
M2068C1_MGX	32685	14275	0.436745	21134	0.646596	46392	1.41937
M2069C2_MGX	52762	27076	0.513172	37461	0.71	77283	1.46475
M2071C1_MGX	41358	17633	0.42635	27329	0.660791	59122	1.42952
M2072C4_MGX	25975	12050	0.463908	18015	0.693551	38463	1.48077
M2075C4_MGX	68453	30322	0.442961	46362	0.677282	98713	1.44206
M2077C1_MGX	42376	19297	0.455376	28512	0.672834	66705	1.57412
M2079C1_MGX	47437	20875	0.440057	32875	0.693024	68933	1.45315
M2081C4_MGX	28804	12453	0.432336	19797	0.6873	41471	1.43977
M2082C1_MGX	28003	11903	0.425062	18824	0.672214	40815	1.45752
M2085C1_MGX	503	91	0.180915	261	0.518887	493	0.980119
M2086C3_MGX	39703	19662	0.495227	27777	0.69962	61165	1.54056
M2091C1_MGX	58699	26087	0.44442	39910	0.679909	79079	1.3472
P6005C1_MGX	26458	11753	0.444213	17832	0.673974	39279	1.48458
P6009C12_MGX	50721	23161	0.456635	35475	0.699414	74809	1.47491
P6009C14_MGX	29216	13298	0.455162	19966	0.683393	42893	1.46813
P6009C18_MGX	19648	8882	0.452056	13744	0.699511	29529	1.5029
P6009C1_MGX	67226	32134	0.478	47660	0.708952	102390	1.52307
P6009C20_MGX	21891	10241	0.467818	15239	0.696131	34604	1.58074
P6009C22_MGX	45197	21504	0.475784	31416	0.69509	71008	1.57108
P6009C24_MGX	41316	18884	0.457063	28680	0.694162	62995	1.52471
P6009C2_MGX	43578	20228	0.464179	30358	0.696636	64729	1.48536
P6009C3_MGX	56092	27113	0.483367	40065	0.714273	81629	1.45527
P6009C7_MGX	31572	15184	0.480932	21975	0.696028	47687	1.51042
P6009C8_MGX	38640	17608	0.455694	26471	0.685067	56966	1.47428
P6009C9_MGX	37035	16755	0.45241	25627	0.691967	54414	1.46926
P6010C1_MGX	32053	13606	0.424484	20813	0.649331	46710	1.45727
P6012C1_MGX	23557	10632	0.451331	15971	0.677973	33574	1.42522
P6013C1_MGX	9051	3669	0.40537	5957	0.658159	11745	1.29765
P6014C7_MGX	24128	9499	0.393692	14981	0.620897	32147	1.33235
P6016C1_MGX	33100	14879	0.449517	22028	0.665498	49035	1.48142
P6017C1_MGX	39417	16993	0.431108	26197	0.664612	55435	1.40637
P6018C2_MGX	24237	9887	0.40793	16469	0.679498	30824	1.27177
P6024C5_MGX	6337	4393	0.69323	5047	0.796434	10220	1.61275
P6025C5_MGX	21703	10512	0.484357	14820	0.682855	35124	1.61839
P6028C1_MGX	32082	16056	0.500468	22099	0.688829	47403	1.47756
P6033C8_MGX	42337	18655	0.440631	28569	0.6748	63279	1.49465
IBDMDB_CD_CSM5MCVL	26060	11602	0.445203	17487	0.671028	39747	1.52521
IBDMDB_CD_CSM5MCVN	32835	15802	0.481255	22560	0.687072	51641	1.57274
IBDMDB_CD_CSM5MCW6	14470	5981	0.413338	9674	0.668556	19886	1.37429
IBDMDB_CD_CSM5MCWC	26644	15114	0.567257	20173	0.757131	41312	1.55052
IBDMDB_CD_CSM5MCWE	33001	19177	0.581104	25095	0.760432	52562	1.59274
IBDMDB_CD_CSM5MCWG	15857	10362	0.653465	12856	0.810746	24385	1.53781
IBDMDB_CD_CSM5MCXD	34249	13995	0.408625	23019	0.672107	46187	1.34856
IBDMDB_CD_CSM5MCXT	24633	8615	0.349734	15647	0.635205	30131	1.2232
IBDMDB_CD_CSM5MCXV	40575	16421	0.404707	26818	0.660949	55758	1.3742
IBDMDB_CD_CSM5MCY2	31055	11906	0.383384	20084	0.646724	40877	1.31628
IBDMDB_CD_CSM5MCYS	48334	20996	0.434394	33038	0.683535	69001	1.42759
IBDMDB_CD_CSM5MCYW	19418	7975	0.410701	13312	0.685549	26099	1.34406
IBDMDB_CD_CSM5MCZ3	46323	20554	0.44371	32895	0.710122	64431	1.39091
IBDMDB_CD_CSM5MCZ5	32987	14201	0.430503	22839	0.692364	45473	1.37851
IBDMDB_CD_CSM5MCZ7	23381	9750	0.417005	15999	0.684274	31759	1.35833
IBDMDB_CD_CSM5MCZB	40109	18076	0.450672	27457	0.68456	59713	1.48877
IBDMDB_CD_CSM5MCZD	52166	22597	0.433175	35528	0.681057	73072	1.40076
IBDMDB_CD_CSM5MCZF	37017	15599	0.421401	25338	0.684496	50535	1.36518
IBDMDB_CD_CSM67U9B	39418	16789	0.425922	26427	0.67043	53387	1.35438
IBDMDB_CD_CSM67U9D	46759	20641	0.441434	31756	0.679142	65113	1.39252
IBDMDB_CD_CSM67U9J	28405	11571	0.407358	18510	0.651646	39897	1.40458
IBDMDB_CD_CSM67UA2	25078	10822	0.431534	16355	0.652165	36763	1.46595
IBDMDB_CD_CSM67UAA	28248	17596	0.622911	22333	0.790605	46195	1.63534
IBDMDB_CD_CSM67UAG	36174	19955	0.551639	27561	0.761901	55912	1.54564
IBDMDB_CD_CSM67UAU	63459	28209	0.444523	44085	0.694701	91697	1.44498
IBDMDB_CD_CSM67UAW	25513	10585	0.414887	17240	0.675734	34824	1.36495
IBDMDB_CD_CSM67UAY	31249	13138	0.420429	20994	0.671829	43470	1.39108
IBDMDB_CD_CSM67UB1	46036	20015	0.434768	31629	0.687049	66594	1.44656
IBDMDB_CD_CSM67UB3	32731	13136	0.401332	21848	0.667502	43757	1.33687
IBDMDB_CD_CSM67UB9	27467	12549	0.456876	18659	0.679324	41836	1.52314
IBDMDB_CD_CSM67UBB	25514	11401	0.446853	16901	0.662421	37726	1.47864
IBDMDB_CD_CSM67UBF	29129	12629	0.433554	20003	0.686704	42177	1.44794
IBDMDB_CD_CSM67UBH	40516	19300	0.476355	28073	0.692887	61734	1.52369
IBDMDB_CD_CSM67UBN	33909	15735	0.464036	23388	0.689728	51455	1.51744
IBDMDB_CD_CSM67UBR	23931	10948	0.457482	16161	0.675317	37038	1.5477
IBDMDB_CD_CSM67UCK	38054	16157	0.424581	25186	0.661849	54521	1.43273
IBDMDB_CD_CSM67UGC	10877	3911	0.359566	6998	0.643376	13902	1.27811
IBDMDB_CD_CSM67UGO	25853	10430	0.403435	17187	0.664797	34833	1.34735
IBDMDB_CD_CSM79HG5	29157	12750	0.437288	19202	0.658573	44068	1.5114
IBDMDB_CD_CSM79HGP	38407	15680	0.408259	25196	0.656026	52900	1.37735
IBDMDB_CD_CSM79HH4	36161	15894	0.439534	24582	0.679793	50361	1.39269
IBDMDB_CD_CSM79HH8	41634	17358	0.416919	27343	0.656747	55746	1.33895
IBDMDB_CD_CSM79HHA	34571	15121	0.43739	23259	0.672789	48553	1.40444
IBDMDB_CD_CSM79HHM	61068	27367	0.44814	41402	0.677966	87365	1.43062
IBDMDB_CD_CSM79HHO	55000	23740	0.431636	36798	0.669055	76003	1.38187
IBDMDB_CD_CSM79HHU	51515	22562	0.43797	34848	0.676463	72547	1.40827
IBDMDB_CD_CSM79HHW	23913	10105	0.422573	15780	0.659892	35228	1.47317
IBDMDB_CD_CSM79HI3	53388	31708	0.593916	41665	0.780419	84072	1.57474
IBDMDB_CD_CSM79HI7	43947	25613	0.582816	34298	0.78044	68162	1.551
IBDMDB_CD_CSM79HIB	42447	24881	0.586166	33284	0.784131	67789	1.59703
IBDMDB_CD_CSM79HIR	50360	21419	0.425318	34261	0.680322	72024	1.43018
IBDMDB_CD_CSM79HIT	30866	11806	0.382492	20615	0.667887	39647	1.28449
IBDMDB_CD_CSM79HIV	50897	21565	0.423699	34403	0.675934	71657	1.40788
IBDMDB_CD_CSM79HIX	44284	19225	0.43413	30025	0.67801	66504	1.50176
IBDMDB_CD_CSM79HIZ	44919	19378	0.431399	30796	0.68559	63928	1.42318
IBDMDB_CD_CSM79HJA	36833	15297	0.415307	25000	0.678739	52120	1.41504
IBDMDB_CD_CSM79HJM	40541	16934	0.417701	26963	0.66508	56156	1.38517
IBDMDB_CD_CSM79HJO	36065	15389	0.426702	23729	0.657951	51432	1.42609
IBDMDB_CD_CSM79HJQ	323	49	0.151703	107	0.331269	170	0.526316
IBDMDB_CD_CSM79HJS	30936	12733	0.411592	20276	0.655418	42734	1.38137
IBDMDB_CD_CSM79HJU	29710	12611	0.42447	19770	0.665433	42594	1.43366
IBDMDB_CD_CSM79HJW	31574	15484	0.490403	21857	0.692247	50176	1.58916
IBDMDB_CD_CSM79HJY	35097	16613	0.473345	24575	0.700202	53234	1.51677
IBDMDB_CD_CSM79HK9	43802	16449	0.375531	28580	0.652482	57514	1.31305
IBDMDB_CD_CSM79HKB	41006	15584	0.380042	26863	0.655099	54492	1.32888
IBDMDB_CD_CSM79HKT	25205	11410	0.452688	17591	0.697917	35619	1.41317
IBDMDB_CD_CSM79HKV	28262	12276	0.434364	19521	0.690715	39037	1.38125
IBDMDB_CD_CSM79HKX	54891	26801	0.488259	38483	0.70108	83651	1.52395
IBDMDB_CD_CSM79HKZ	48830	22728	0.465452	34039	0.697092	73105	1.49713
IBDMDB_CD_CSM79HL4	42135	19635	0.466002	29767	0.706467	62413	1.48126
IBDMDB_CD_CSM79HL6	35708	17732	0.496583	25730	0.720567	54100	1.51507
IBDMDB_CD_CSM79HN2	76139	32857	0.43154	51796	0.680282	106502	1.39878
IBDMDB_CD_CSM79HN6	44398	18938	0.426551	29566	0.665931	61656	1.38871
IBDMDB_CD_CSM79HNO	21387	11506	0.53799	15796	0.73858	33462	1.5646
IBDMDB_CD_CSM79HNU	12604	6161	0.488813	8881	0.704618	20019	1.58831
IBDMDB_CD_CSM79HNW	15411	8133	0.52774	11336	0.735578	24739	1.60528
IBDMDB_CD_CSM79HOF	36110	13619	0.377153	23328	0.646026	46778	1.29543
IBDMDB_CD_CSM79HOH	61743	24028	0.389162	40719	0.659492	81968	1.32757
IBDMDB_CD_CSM79HOJ	46972	21489	0.457485	32390	0.68956	68769	1.46404
IBDMDB_CD_CSM79HOL	62200	27715	0.445579	42984	0.691061	89100	1.43248
IBDMDB_CD_CSM79HOT	42429	19077	0.449622	29284	0.690188	60820	1.43345
IBDMDB_CD_CSM79HPA	45066	19989	0.443549	31355	0.695757	63262	1.40376
IBDMDB_CD_CSM79HPA_TR	49617	22190	0.447226	33804	0.681299	69991	1.41063
IBDMDB_CD_CSM79HPC	31993	13007	0.406558	20868	0.652268	43022	1.34473
IBDMDB_CD_CSM79HQ9	19353	8262	0.426911	13206	0.682375	27049	1.39766
IBDMDB_CD_CSM79HQB	41715	17373	0.416469	27594	0.661489	54810	1.31392
IBDMDB_CD_CSM79HQF	17302	7103	0.410531	11649	0.673275	23628	1.36562
IBDMDB_CD_CSM79HQV	24817	10893	0.438933	16260	0.655196	37398	1.50695
IBDMDB_CD_CSM79HQX	21779	9222	0.423435	14279	0.655632	32249	1.48074
IBDMDB_CD_CSM79HQZ	28886	12661	0.438309	19357	0.670117	42353	1.46621
IBDMDB_CD_CSM79HR2	21046	8361	0.397273	13593	0.645871	29942	1.42269
IBDMDB_CD_CSM79HR4	15412	6202	0.402414	9745	0.6323	22826	1.48105
IBDMDB_CD_CSM79HR6	24713	10308	0.417108	16157	0.653785	35643	1.44228
IBDMDB_CD_CSM79HR8	11788	4965	0.421191	8120	0.688836	17743	1.50517
IBDMDB_CD_CSM79HRC	39936	17814	0.446064	27428	0.686799	56892	1.42458
IBDMDB_CD_CSM79HRE	23069	10152	0.440071	15540	0.673631	34289	1.48637
IBDMDB_CD_CSM79HRG	30736	14448	0.470068	21458	0.698139	46386	1.50917
IBDMDB_CD_CSM7KOJE	46901	26628	0.567749	36440	0.776956	71157	1.51717
IBDMDB_CD_CSM7KOJG	48059	29635	0.616638	37737	0.785222	78802	1.63969
IBDMDB_CD_CSM7KOJO	39557	22523	0.569381	30714	0.776449	61723	1.56036
IBDMDB_CD_CSM7KOK3	1924	384	0.199584	990	0.514553	1733	0.900728
IBDMDB_CD_CSM7KOK5	19099	6994	0.366197	12510	0.655008	25645	1.34274
IBDMDB_CD_CSM7KOK7	27057	10641	0.393281	18282	0.675685	36772	1.35906
IBDMDB_CD_CSM7KOKB	28239	11914	0.421899	19481	0.689862	42043	1.48883
IBDMDB_CD_CSM7KOKD	45591	19767	0.433572	30909	0.677963	68783	1.5087
IBDMDB_CD_CSM7KOKF	45105	19065	0.42268	30323	0.672276	64069	1.42044
IBDMDB_CD_CSM7KOKJ	33155	13986	0.421837	22476	0.677907	46050	1.38893
IBDMDB_CD_CSM7KOKN	35208	16035	0.455436	24159	0.686179	52375	1.48759
IBDMDB_CD_CSM7KOKR	46017	22096	0.48017	32793	0.712628	68636	1.49154
IBDMDB_CD_CSM7KOKT	34590	16711	0.483117	24500	0.708297	53163	1.53695
IBDMDB_CD_CSM7KOKZ	49527	21864	0.441456	33967	0.685828	72966	1.47326
IBDMDB_CD_CSM7KOL2	48061	20879	0.434427	33425	0.69547	69443	1.44489
IBDMDB_CD_CSM7KOL4	62449	25907	0.414851	41459	0.663886	87520	1.40146
IBDMDB_CD_CSM7KOLA	57174	23954	0.418967	38952	0.681289	78602	1.37479
IBDMDB_CD_CSM7KOLE	26472	10023	0.378626	17294	0.653294	33737	1.27444
IBDMDB_CD_CSM7KOLK	47247	19994	0.42318	31434	0.665312	65033	1.37645
IBDMDB_CD_CSM7KOLM	69653	31930	0.458415	47350	0.679798	103177	1.4813
IBDMDB_CD_CSM7KOMB	31278	15120	0.483407	22146	0.708038	47813	1.52865
IBDMDB_CD_CSM7KOMH	22409	11002	0.490963	16587	0.740194	33836	1.50993
IBDMDB_CD_CSM7KOMX	39308	16934	0.430803	26761	0.680803	55225	1.40493
IBDMDB_CD_CSM7KOMZ	28833	11230	0.389484	19232	0.667013	39010	1.35296
IBDMDB_CD_CSM7KON2	37676	16407	0.435476	26054	0.691528	52083	1.38239
IBDMDB_CD_CSM7KON8	44158	18348	0.415508	29938	0.677975	59935	1.35729
IBDMDB_CD_CSM7KONA	12246	4042	0.330067	7619	0.622162	14592	1.19157
IBDMDB_CD_CSM7KONK	25671	10061	0.391921	16278	0.634101	35289	1.37466
IBDMDB_CD_CSM7KOO5	25489	11080	0.434697	16930	0.664208	38195	1.49849
IBDMDB_CD_CSM7KOO9	35808	15988	0.446492	24736	0.690795	54431	1.52008
IBDMDB_CD_CSM7KOOD	35791	16079	0.449247	24336	0.679947	53510	1.49507
IBDMDB_CD_CSM7KOOF	37884	15768	0.416218	25888	0.683349	52381	1.38267
IBDMDB_CD_CSM7KOOT	18774	7811	0.416054	11897	0.633696	28460	1.51593
IBDMDB_CD_CSM7KOOV	20482	8316	0.406015	13084	0.638805	30055	1.46739
IBDMDB_CD_CSM7KOOX	30898	13116	0.424493	20495	0.663312	44179	1.42983
IBDMDB_CD_CSM7KOOZ	27234	11191	0.41092	18013	0.661416	38095	1.3988
IBDMDB_CD_CSM7KOP2	20260	8270	0.408193	12816	0.632577	29972	1.47937
IBDMDB_CD_CSM7KOPS	48777	21441	0.439572	34305	0.703303	71458	1.46499
IBDMDB_CD_CSM7KOPU	39635	17547	0.442715	27183	0.685833	61021	1.53957
IBDMDB_CD_CSM7KOPW	27434	11830	0.431217	18559	0.676496	41831	1.52479
IBDMDB_CD_CSM7KOQ1	13299	4752	0.35732	8850	0.665464	16491	1.24002
IBDMDB_CD_CSM7KOQX	35062	14827	0.422879	23717	0.67643	49560	1.4135
IBDMDB_CD_CSM7KOR2	39894	17590	0.440918	27107	0.679476	59078	1.48087
IBDMDB_CD_CSM7KORC	33466	13792	0.41212	23094	0.690074	47058	1.40614
IBDMDB_CD_CSM7KORG	40914	19757	0.482891	28851	0.705162	61145	1.49448
IBDMDB_CD_CSM7KORI	34484	15014	0.43539	23470	0.680605	52704	1.52836
IBDMDB_CD_CSM7KORK	55874	26016	0.465619	39416	0.705444	82979	1.48511
IBDMDB_CD_CSM7KOSJ	9948	4734	0.475875	6702	0.673703	16536	1.66224
IBDMDB_CD_CSM7KOSL	11713	5708	0.487322	8218	0.701614	18863	1.61043
IBDMDB_CD_CSM7KOSP	23869	12922	0.541372	17863	0.748377	37739	1.58109
IBDMDB_CD_CSM7KOST	23537	11903	0.505714	17238	0.732379	36305	1.54247
IBDMDB_CD_CSM7KOSV	57868	25949	0.448417	38975	0.673516	83802	1.44816
IBDMDB_CD_CSM7KOSX	52309	22535	0.430805	35041	0.669885	72741	1.3906
IBDMDB_CD_CSM7KOTA	27487	11397	0.414632	18235	0.663405	38934	1.41645
IBDMDB_CD_CSM7KOTC	33864	14017	0.41392	22400	0.661469	46317	1.36774
IBDMDB_CD_CSM7KOTK	43131	17504	0.405833	28140	0.652431	60049	1.39225
IBDMDB_CD_CSM7KOTO	31802	14301	0.449689	21829	0.686403	47486	1.49318
IBDMDB_CD_CSM7KOTQ	39352	17191	0.436852	27243	0.69229	55908	1.42072
IBDMDB_CD_CSM7KOTS	35724	15380	0.430523	24643	0.689816	49043	1.37283
IBDMDB_CD_CSM7KOTU	43715	19358	0.442823	30915	0.707194	60994	1.39526
IBDMDB_CD_CSM9X1YV	41041	18661	0.454692	28431	0.692746	60480	1.47365
IBDMDB_CD_CSM9X1Z4	35998	16075	0.446553	24856	0.690483	52952	1.47097
IBDMDB_CD_CSM9X1ZC	28232	12175	0.431248	19101	0.676573	41383	1.46582
IBDMDB_CD_CSM9X21R	35291	16408	0.464934	24311	0.688873	53314	1.5107
IBDMDB_CD_CSM9X21T	35777	15200	0.424854	24534	0.685748	49541	1.38472
IBDMDB_CD_CSM9X222	44273	19109	0.431617	31091	0.702256	60904	1.37565
IBDMDB_CD_CSM9X233	40963	18011	0.439689	28811	0.703342	56019	1.36755
IBDMDB_CD_CSM9X235	34874	15010	0.430407	23927	0.686099	48016	1.37684
IBDMDB_CD_CSM9X237	42492	20254	0.476654	30276	0.712511	60269	1.41836
IBDMDB_CD_CSM9X23B	53739	24273	0.451683	37491	0.69765	77113	1.43495
IBDMDB_CD_CSMA88CB	23816	9588	0.402586	16064	0.674505	30536	1.28216
IBDMDB_CD_CSMA9J65	27084	11751	0.433872	18211	0.67239	37381	1.38019
IBDMDB_CD_CSMACTZP	41583	18858	0.453503	28218	0.678595	60771	1.46144
IBDMDB_CD_CSMAF72L	26200	10834	0.413511	17375	0.663168	37293	1.4234
IBDMDB_CD_CSMAH393	31025	13357	0.430524	20260	0.653022	46000	1.48268
IBDMDB_CD_CSMAIG7X	17176	6555	0.381637	10762	0.626572	24317	1.41575
IBDMDB_CD_ESM5GEXY	29630	13176	0.444684	21010	0.709079	41377	1.39646
IBDMDB_CD_ESM5MEB7	34403	13697	0.398134	22680	0.659245	43459	1.26323
IBDMDB_CD_ESM5MEBE	30222	12678	0.419496	20583	0.68106	42621	1.41026
IBDMDB_CD_ESM5MEBG	34683	14501	0.418101	24006	0.692155	48051	1.38543
IBDMDB_CD_ESM5MEBI	40343	17832	0.44201	27616	0.68453	59084	1.46454
IBDMDB_CD_ESM5MECL	37494	16908	0.450952	25449	0.678749	56179	1.49835
IBDMDB_CD_ESM5MECQ	41475	18484	0.445666	29119	0.702086	58723	1.41586
IBDMDB_CD_ESM5MED2	36516	14180	0.388323	24507	0.67113	45013	1.23269
IBDMDB_CD_ESM5MEDD	52217	23298	0.446177	35333	0.676657	75901	1.45357
IBDMDB_CD_ESM5MEDF	38865	16785	0.43188	26636	0.685347	52576	1.35279
IBDMDB_CD_ESM5MEDK	49456	21634	0.437439	33541	0.678199	71355	1.4428
IBDMDB_CD_ESM5MEDN	21235	8675	0.408524	13888	0.654015	29067	1.36883
IBDMDB_CD_ESM718T7	33923	13698	0.403797	22198	0.654364	43419	1.27993
IBDMDB_CD_ESM718T9	24672	9421	0.38185	15898	0.644374	30629	1.24145
IBDMDB_CD_ESM718TF	22650	9352	0.412892	14973	0.66106	29751	1.31351
IBDMDB_CD_ESM718TK	19661	8239	0.419053	12892	0.655714	26174	1.33126
IBDMDB_CD_ESM718TM	17401	6403	0.367967	11093	0.637492	21429	1.23148
IBDMDB_CD_ESM718UH	33618	14395	0.428193	22768	0.677256	47075	1.40029
IBDMDB_CD_ESM718V4	27563	12612	0.45757	19226	0.697529	38149	1.38407
IBDMDB_CD_ESM718V8	38085	15164	0.398162	25217	0.662124	49051	1.28793
IBDMDB_CD_ESM7F5AK	44636	19394	0.434492	30122	0.674836	61767	1.38379
IBDMDB_CD_ESM7F5AM	52762	22964	0.435237	36073	0.683693	75996	1.44035
IBDMDB_CD_ESM7F5C5	24325	10076	0.414224	16096	0.661706	32155	1.32189
IBDMDB_CD_ESM7F5C7	41183	16865	0.409514	27371	0.664619	53957	1.31018
IBDMDB_CD_ESM7F5CB	43019	18572	0.431716	29584	0.687696	61852	1.43778
IBDMDB_CD_ESM7F5CD	45688	20948	0.458501	31045	0.6795	67368	1.47452
IBDMDB_CD_ESM7F5CF	46256	21878	0.472976	32139	0.694807	69756	1.50804
IBDMDB_CD_ESM9IEP1	21545	8766	0.406869	14171	0.65774	27609	1.28146
IBDMDB_CD_HSM5FZBZ	18936	7761	0.409854	12704	0.670891	25879	1.36666
IBDMDB_CD_HSM5MD48	24320	11205	0.460732	16866	0.693503	37367	1.53647
IBDMDB_CD_HSM5MD4N	37120	15277	0.411557	24434	0.658244	52711	1.42002
IBDMDB_CD_HSM5MD4O	46978	20206	0.430116	31822	0.677381	67903	1.44542
IBDMDB_CD_HSM5MD4Y	25131	12775	0.508336	18374	0.731129	36806	1.46457
IBDMDB_CD_HSM5MD53	40158	21498	0.535335	29471	0.733876	64116	1.59659
IBDMDB_CD_HSM5MD5P	42562	20831	0.489427	30100	0.707204	66377	1.55954
IBDMDB_CD_HSM5MD62	48006	20539	0.427842	32499	0.676978	70171	1.46171
IBDMDB_CD_HSM5MD66	29688	13392	0.451091	20674	0.696376	42201	1.42148
IBDMDB_CD_HSM5MD6A	37879	16533	0.436469	25587	0.675493	54652	1.4428
IBDMDB_CD_HSM5MD6A_TR	46301	21294	0.459904	31657	0.683722	70100	1.51401
IBDMDB_CD_HSM5MD6C	23260	9019	0.387747	15210	0.653912	29509	1.26866
IBDMDB_CD_HSM5MD6Y	55330	24666	0.445798	38329	0.692735	79548	1.4377
IBDMDB_CD_HSM5MD71	37065	16206	0.437232	26091	0.703926	51456	1.38826
IBDMDB_CD_HSM5MD73	60660	25730	0.424167	41796	0.689021	85275	1.40579
IBDMDB_CD_HSM5MD75	4154	1722	0.41454	2922	0.703418	5494	1.32258
IBDMDB_CD_HSM5MD79	26108	11504	0.440631	17321	0.663436	39467	1.51168
IBDMDB_CD_HSM5MD7J	12250	4668	0.381061	7832	0.639347	15985	1.3049
IBDMDB_CD_HSM5MD7K	45006	21376	0.474959	31391	0.697485	67405	1.49769
IBDMDB_CD_HSM5MD7M	3675	1686	0.458776	2686	0.730884	4923	1.33959
IBDMDB_CD_HSM5MD7O	359	31	0.086351	42	0.116992	100	0.278552
IBDMDB_CD_HSM5MD7Q	21511	12860	0.597834	16351	0.760123	32119	1.49314
IBDMDB_CD_HSM5MD7S	25165	12016	0.477489	18145	0.721041	35062	1.39328
IBDMDB_CD_HSM5MD7U	31103	15230	0.489663	22044	0.708742	44911	1.44394
IBDMDB_CD_HSM67VCZ	30558	13387	0.438085	20513	0.671281	46548	1.52327
IBDMDB_CD_HSM67VD2	42964	19079	0.444069	29095	0.677195	65194	1.51741
IBDMDB_CD_HSM67VD4	26242	11818	0.450347	17756	0.676625	39929	1.52157
IBDMDB_CD_HSM67VD6	38095	16567	0.434886	25707	0.674813	56950	1.49495
IBDMDB_CD_HSM67VDP	14271	8359	0.585733	10454	0.732535	23626	1.65553
IBDMDB_CD_HSM67VDZ	6431	2557	0.397605	4082	0.634738	8577	1.3337
IBDMDB_CD_HSM67VE4	9127	3666	0.401665	5773	0.632519	12684	1.38972
IBDMDB_CD_HSM67VEC	12245	5787	0.472601	8328	0.680114	17905	1.46223
IBDMDB_CD_HSM67VEE	31834	14778	0.464221	22320	0.701137	44619	1.40161
IBDMDB_CD_HSM67VEG	18188	7728	0.424896	12508	0.687706	24149	1.32774
IBDMDB_CD_HSM67VEI	38185	17955	0.470211	26379	0.690821	55520	1.45397
IBDMDB_CD_HSM67VEK	47054	21887	0.465146	32628	0.693416	66713	1.4178
IBDMDB_CD_HSM67VEM	50591	23224	0.459054	34443	0.680813	71686	1.41697
IBDMDB_CD_HSM67VEM_TR	40089	18118	0.451944	26878	0.670458	56143	1.40046
IBDMDB_CD_HSM67VF9	27523	16235	0.58987	20722	0.752898	42841	1.55655
IBDMDB_CD_HSM67VFD	7603	3944	0.518743	5366	0.705774	13006	1.71064
IBDMDB_CD_HSM67VFF	22249	9968	0.44802	15557	0.699222	32741	1.47157
IBDMDB_CD_HSM67VFH	21021	10982	0.52243	14775	0.702869	33097	1.57447
IBDMDB_CD_HSM67VFJ	36133	19207	0.531564	25974	0.718844	59453	1.64539
IBDMDB_CD_HSM67VHB	39069	16933	0.433413	26549	0.679541	58650	1.50119
IBDMDB_CD_HSM67VHD	35030	15374	0.438881	23734	0.677534	52394	1.49569
IBDMDB_CD_HSM67VHF	40756	17919	0.439665	27600	0.677201	61773	1.51568
IBDMDB_CD_HSM67VHH	27892	11828	0.424064	18953	0.679514	40125	1.43858
IBDMDB_CD_HSM67VHJ	44827	19711	0.439713	30525	0.680951	67333	1.50206
IBDMDB_CD_HSM67VHK	8866	3352	0.378074	6011	0.677983	12116	1.36657
IBDMDB_CD_HSM67VHQ	37999	16872	0.444012	25722	0.676913	56914	1.49778
IBDMDB_CD_HSM67VHS	29055	12289	0.422956	19260	0.662881	42310	1.4562
IBDMDB_CD_HSM67VHW	43278	19224	0.444198	29350	0.678174	63277	1.46211
IBDMDB_CD_HSM67VI1	32994	14121	0.427987	22179	0.672213	48954	1.48372
IBDMDB_CD_HSM67VID	17285	7098	0.410645	10945	0.633208	23186	1.34139
IBDMDB_CD_HSM67VIF	25166	10264	0.407852	16576	0.658666	32859	1.30569
IBDMDB_CD_HSM67VIL	20645	8550	0.414144	13517	0.654735	28123	1.36222
IBDMDB_CD_HSM6XRQB	52744	22406	0.424807	37123	0.703834	74355	1.40973
IBDMDB_CD_HSM6XRQI	19398	7247	0.373595	12706	0.655016	26762	1.37963
IBDMDB_CD_HSM6XRQK	35535	15084	0.424483	23705	0.667089	51900	1.46053
IBDMDB_CD_HSM6XRQM	40928	19296	0.471462	28634	0.699619	62076	1.51671
IBDMDB_CD_HSM6XRQO	30748	13185	0.428808	20608	0.670222	44497	1.44715
IBDMDB_CD_HSM6XRR3	33403	14421	0.431728	22500	0.673592	50793	1.52061
IBDMDB_CD_HSM6XRRV	37524	16834	0.44862	26053	0.694302	51334	1.36803
IBDMDB_CD_HSM6XRS2	12475	4867	0.39014	8097	0.649058	15047	1.20617
IBDMDB_CD_HSM6XRS4	17355	9807	0.565082	13739	0.791645	24071	1.38698
IBDMDB_CD_HSM6XRS6	12687	7951	0.626705	9894	0.779853	19206	1.51383
IBDMDB_CD_HSM6XRS8	54	0	0	2	0.037037	1	0.0185185
IBDMDB_CD_HSM6XRSE	11682	5209	0.4459	8147	0.697398	17013	1.45634
IBDMDB_CD_HSM6XRSG	11089	6527	0.588601	7944	0.716386	17198	1.55091
IBDMDB_CD_HSM6XRSI	13730	7904	0.575674	9964	0.72571	20733	1.51005
IBDMDB_CD_HSM6XRSN	43266	18622	0.430407	29044	0.671289	63013	1.45641
IBDMDB_CD_HSM6XRST	51921	23448	0.451609	35785	0.68922	77548	1.49358
IBDMDB_CD_HSM6XRUV	44408	19890	0.447892	30281	0.681882	67253	1.51443
IBDMDB_CD_HSM6XRVM	22617	8566	0.378742	14772	0.653137	27290	1.20661
IBDMDB_CD_HSM6XRVO	24882	10573	0.424926	16990	0.682823	33500	1.34635
IBDMDB_CD_HSM6XRVU	34920	14855	0.425401	23751	0.680155	46339	1.327
IBDMDB_CD_HSM6XRVW	45610	21724	0.476299	31251	0.685179	65927	1.44545
IBDMDB_CD_HSM7CYX2	59534	27652	0.464474	41821	0.702473	83564	1.40363
IBDMDB_CD_HSM7CYX4	50839	23315	0.458605	35071	0.689844	72665	1.42932
IBDMDB_CD_HSM7CYX6	58283	26170	0.449016	40247	0.690544	80647	1.38371
IBDMDB_CD_HSM7CYX8	51535	22530	0.437179	35087	0.680838	70027	1.35882
IBDMDB_CD_HSM7CYXA	39598	17330	0.437648	26789	0.676524	53689	1.35585
IBDMDB_CD_HSM7CYXC	40531	18143	0.447633	27744	0.684513	57433	1.41701
IBDMDB_CD_HSM7CYXQ	35059	13970	0.398471	23097	0.658804	49459	1.41074
IBDMDB_CD_HSM7CYXS	39870	17740	0.444946	27159	0.681189	60162	1.50895
IBDMDB_CD_HSM7CYY3	33274	17503	0.526026	24571	0.738444	54195	1.62875
IBDMDB_CD_HSM7CYY5	27907	11504	0.412226	18630	0.667574	41004	1.46931
IBDMDB_CD_HSM7CYY7	46881	22139	0.472238	33777	0.720484	71361	1.52217
IBDMDB_CD_HSM7CYY9	38941	18836	0.483706	27227	0.699186	60828	1.56206
IBDMDB_CD_HSM7CYYB	9946	5713	0.574402	7388	0.742811	13836	1.39111
IBDMDB_CD_HSM7CYYD	45988	22335	0.48567	32778	0.712751	72036	1.56641
IBDMDB_CD_HSM7CYZ5	24025	11434	0.475921	16435	0.684079	36816	1.5324
IBDMDB_CD_HSM7CYZ7	27942	14346	0.513421	20308	0.726791	42501	1.52104
IBDMDB_CD_HSM7CYZ9	18997	8845	0.4656	13132	0.691267	28653	1.50829
IBDMDB_CD_HSM7CYZB	21290	9771	0.458948	14612	0.686332	32026	1.50427
IBDMDB_CD_HSM7CYZD	14313	6247	0.436456	9897	0.691469	19911	1.39111
IBDMDB_CD_HSM7CYZF	17352	9073	0.522879	13080	0.753804	25137	1.44865
IBDMDB_CD_HSM7CYZT	13711	6878	0.501641	9897	0.721829	22106	1.61228
IBDMDB_CD_HSM7CYZV	10832	5587	0.515787	7928	0.731905	17688	1.63294
IBDMDB_CD_HSM7CZ14	19218	10595	0.551306	14479	0.753408	30113	1.56692
IBDMDB_CD_HSM7CZ2Z	32472	13778	0.424304	21975	0.676737	47160	1.45233
IBDMDB_CD_HSM7CZ32	30974	14823	0.478563	21550	0.695745	47316	1.5276
IBDMDB_CD_HSM7CZ36	45799	21541	0.470338	32690	0.713771	66878	1.46025
IBDMDB_CD_HSM7CZ38	29397	13747	0.467633	20219	0.687791	46385	1.57788
IBDMDB_CD_HSM7CZ3A	39308	17300	0.440114	26678	0.678691	56935	1.44843
IBDMDB_CD_HSM7CZ3C	39837	17155	0.43063	26744	0.671336	57125	1.43397
IBDMDB_CD_HSM7CZ3E	38560	15773	0.409051	25687	0.666157	53041	1.37554
IBDMDB_CD_HSM7CZ3G	40390	16662	0.412528	26955	0.667368	57806	1.4312
IBDMDB_CD_HSM7J4GD	37879	15055	0.39745	24647	0.650677	53443	1.41089
IBDMDB_CD_HSM7J4IC	42397	18654	0.439984	28616	0.674953	64330	1.51732
IBDMDB_CD_HSM7J4IO	28469	13403	0.470793	20251	0.711335	40381	1.41842
IBDMDB_CD_HSM7J4IP	45098	19823	0.439554	31080	0.689166	66203	1.46798
IBDMDB_CD_HSM7J4IQ	41436	17563	0.423858	28145	0.67924	59849	1.44437
IBDMDB_CD_HSM7J4IR	52192	22515	0.431388	35909	0.688017	75129	1.43947
IBDMDB_CD_HSM7J4IS	35721	15273	0.427564	24314	0.680664	51459	1.44058
IBDMDB_CD_HSM7J4J7	35073	15315	0.436661	24543	0.699769	52933	1.50922
IBDMDB_CD_HSM7J4J9	34493	15269	0.44267	23814	0.690401	53195	1.5422
IBDMDB_CD_HSM7J4JD	38716	16972	0.438372	26764	0.69129	59100	1.5265
IBDMDB_CD_HSM7J4JF	42803	18101	0.422891	29471	0.688527	62738	1.46574
IBDMDB_CD_HSM7J4JH	25068	12168	0.4854	18725	0.746968	35721	1.42496
IBDMDB_CD_HSM7J4JJ	35510	17481	0.492284	25523	0.718755	49979	1.40746
IBDMDB_CD_HSM7J4JN	18671	8667	0.464196	13189	0.70639	24989	1.33839
IBDMDB_CD_HSM7J4JP	18359	8975	0.488861	13262	0.72237	24843	1.35318
IBDMDB_CD_HSM7J4L5	26561	11524	0.433869	17828	0.67121	39334	1.48089
IBDMDB_CD_HSM7J4L9	35653	15932	0.446863	24370	0.683533	52043	1.45971
IBDMDB_CD_HSM7J4LP	83	22	0.26506	22	0.26506	32	0.385542
IBDMDB_CD_HSM7J4MK	39096	16771	0.42897	25795	0.659786	57158	1.46199
IBDMDB_CD_HSM7J4MS	35022	15001	0.428331	23534	0.671978	52797	1.50754
IBDMDB_CD_HSM7J4MW	40750	17571	0.43119	27802	0.682258	61465	1.50834
IBDMDB_CD_HSM7J4MY	43291	17660	0.407937	28613	0.660946	60956	1.40805
IBDMDB_CD_HSM7J4N4	35376	13389	0.378477	22752	0.643148	46192	1.30574
IBDMDB_CD_HSM7J4N6	30668	12478	0.406874	20204	0.658797	41687	1.3593
IBDMDB_CD_HSM7J4N8	37470	15325	0.408994	24699	0.659167	52202	1.39317
IBDMDB_CD_HSM7J4NA	50627	20622	0.407332	33591	0.6635	69350	1.36982
IBDMDB_CD_HSM7J4OB	52696	21903	0.415648	34971	0.663637	72800	1.38151
IBDMDB_CD_HSM7J4OE	45529	18660	0.409849	30051	0.660041	62327	1.36895
IBDMDB_CD_HSM7J4OL	45174	19509	0.431863	30252	0.669677	66044	1.46199
IBDMDB_CD_HSM7J4ON	27236	12126	0.44522	18334	0.673153	40578	1.48987
IBDMDB_CD_HSM7J4OP	21726	9016	0.414987	14510	0.667863	30740	1.41489
IBDMDB_CD_HSM7J4OT	15279	8141	0.532823	11594	0.758819	21551	1.4105
IBDMDB_CD_HSM7J4OV	11232	6123	0.545139	8430	0.750534	17228	1.53383
IBDMDB_CD_HSM7J4OX	44368	20927	0.471669	32572	0.734133	62728	1.41381
IBDMDB_CD_HSM7J4OZ	34610	14308	0.413407	23483	0.678503	49381	1.42678
IBDMDB_CD_HSM7J4P2	47783	21285	0.445451	32735	0.685076	72258	1.51221
IBDMDB_CD_HSM7J4PA	33636	13542	0.402604	21912	0.651445	46625	1.38616
IBDMDB_CD_HSM7J4PO	56336	25901	0.459759	39492	0.701008	81586	1.4482
IBDMDB_CD_HSM7J4PQ	38450	17046	0.443329	26191	0.68117	57297	1.49017
IBDMDB_CD_HSM7J4PS	47203	20624	0.436921	32253	0.683283	69539	1.47319
IBDMDB_CD_HSM7J4PU	28219	11904	0.421843	18867	0.668592	41412	1.46752
IBDMDB_CD_HSM7J4PW	45902	20385	0.444098	31596	0.688336	68311	1.48819
IBDMDB_CD_HSM7J4PY	32606	14060	0.431209	22057	0.676471	47791	1.46571
IBDMDB_CD_HSM7J4Q1	67859	30269	0.446057	47068	0.693615	100129	1.47554
IBDMDB_CD_HSM7J4Q7	50142	20679	0.412409	33830	0.674684	70586	1.40772
IBDMDB_CD_HSM7J4Q9	52881	22156	0.418978	35712	0.675328	75800	1.43341
IBDMDB_CD_HSM7J4QB	23347	11149	0.477535	16614	0.711612	33465	1.43337
IBDMDB_CD_HSM7J4QD	3216	1413	0.439366	2411	0.749689	4022	1.25062
IBDMDB_CD_HSM7J4QF	38056	18073	0.474905	26439	0.694739	56733	1.49078
IBDMDB_CD_HSM7J4QH	21958	10354	0.471537	16008	0.729028	29725	1.35372
IBDMDB_CD_HSM7J4QL	35215	16574	0.470652	24257	0.688826	52429	1.48883
IBDMDB_CD_HSM7J4QT	23010	9988	0.434072	15289	0.66445	31376	1.36358
IBDMDB_CD_HSMA33IE	29482	14102	0.478326	20386	0.691473	46918	1.59141
IBDMDB_CD_HSMA33IG	40862	17978	0.439969	28018	0.685674	61446	1.50374
IBDMDB_CD_HSMA33IK	36737	16341	0.44481	25181	0.68544	55869	1.52078
IBDMDB_CD_HSMA33JB	58670	24268	0.413636	38950	0.663883	81434	1.388
IBDMDB_CD_HSMA33JD	37637	15487	0.411483	25194	0.669394	52511	1.3952
IBDMDB_CD_HSMA33JN	51238	22476	0.438659	34852	0.680198	76401	1.4911
IBDMDB_CD_HSMA33JP	54599	23764	0.435246	37269	0.682595	80424	1.47299
IBDMDB_CD_HSMA33JR	50757	21582	0.425202	34306	0.675887	74231	1.46248
IBDMDB_CD_HSMA33JZ	4944	1969	0.398261	3482	0.704288	6659	1.34689
IBDMDB_CD_HSMA33KE	50214	20419	0.40664	34607	0.68919	68723	1.3686
IBDMDB_CD_HSMA33KM	41182	18084	0.439124	28307	0.687363	61091	1.48344
IBDMDB_CD_HSMA33KO	38009	16438	0.432477	26340	0.692994	57879	1.52277
IBDMDB_CD_HSMA33KQ	26927	12798	0.475285	19063	0.707951	37743	1.40168
IBDMDB_CD_HSMA33KS	68908	31453	0.456449	49815	0.72292	97176	1.41023
IBDMDB_CD_HSMA33KU	44392	21396	0.481979	31565	0.711052	63054	1.42039
IBDMDB_CD_HSMA33L1	38142	16395	0.429841	27030	0.708668	50714	1.32961
IBDMDB_CD_HSMA33LP	60597	27073	0.446771	41824	0.690199	89345	1.47441
IBDMDB_CD_HSMA33MV	42327	18335	0.433175	28868	0.682023	63160	1.49219
IBDMDB_CD_HSMA33NA	37401	15948	0.426406	25660	0.686078	56264	1.50434
IBDMDB_CD_HSMA33NC	54968	23610	0.429523	37602	0.684071	79839	1.45246
IBDMDB_CD_HSMA33NO	24280	11744	0.48369	16814	0.692504	33758	1.39036
IBDMDB_CD_HSMA33NQ	20934	8248	0.394	14259	0.681141	25826	1.23369
IBDMDB_CD_HSMA33PL	45350	20242	0.446351	32467	0.715921	61272	1.35109
IBDMDB_CD_HSMA33PN	47184	21490	0.455451	33911	0.718697	65600	1.3903
IBDMDB_CD_HSMA33PX	33927	14139	0.416748	22856	0.673682	50307	1.4828
IBDMDB_CD_HSMA33PZ	24440	10360	0.423895	16218	0.663584	35875	1.46788
IBDMDB_CD_HSMA33Q6	29048	11926	0.410562	19377	0.667068	42209	1.45308
IBDMDB_CD_HSMA33QY	37570	16233	0.432073	25858	0.688262	55219	1.46976
IBDMDB_CD_HSMA33R1	42317	19249	0.454876	29068	0.686911	65027	1.53666
IBDMDB_CD_HSMA33R5	49670	21937	0.441655	34061	0.685746	72734	1.46434
IBDMDB_CD_HSMA33R7	29949	13470	0.449765	20737	0.69241	44508	1.48613
IBDMDB_CD_HSMA33R9	34612	15518	0.448342	24294	0.701895	51255	1.48084
IBDMDB_CD_HSMA33S4	38832	17140	0.441389	26697	0.6875	57921	1.49158
IBDMDB_CD_MSM5LLDA	34684	14160	0.408257	23334	0.67276	47452	1.36812
IBDMDB_CD_MSM5LLDC	38449	17778	0.462379	26900	0.699628	57025	1.48313
IBDMDB_CD_MSM5LLDE	13045	5152	0.394941	8236	0.631353	16656	1.27681
IBDMDB_CD_MSM5LLDI	26397	11924	0.451718	17869	0.676933	41428	1.56942
IBDMDB_CD_MSM5LLDK	31773	14821	0.466465	22188	0.698329	46848	1.47446
IBDMDB_CD_MSM5LLDM	36312	16781	0.462134	24975	0.687789	56089	1.54464
IBDMDB_CD_MSM5LLDQ	45296	20703	0.45706	31337	0.691827	67964	1.50044
IBDMDB_CD_MSM5LLDS	23422	9755	0.416489	15675	0.669243	33626	1.43566
IBDMDB_CD_MSM5LLDU	29	5	0.172414	9	0.310345	11	0.37931
IBDMDB_CD_MSM5LLEP	62326	29228	0.468954	43974	0.705548	95278	1.5287
IBDMDB_CD_MSM5LLER	53437	23769	0.444804	37254	0.697157	81209	1.51971
IBDMDB_CD_MSM5LLF4	38211	19320	0.505614	28602	0.748528	54907	1.43694
IBDMDB_CD_MSM5LLF6	47302	23225	0.490994	34955	0.738975	67086	1.41825
IBDMDB_CD_MSM5LLF8	19238	9880	0.513567	14256	0.741033	28570	1.48508
IBDMDB_CD_MSM5LLGL	42610	19989	0.469115	29681	0.696574	63824	1.49786
IBDMDB_CD_MSM5LLHC	34620	14062	0.406181	22950	0.662912	45423	1.31205
IBDMDB_CD_MSM6J2IE	38484	17358	0.451045	26066	0.67732	58242	1.51341
IBDMDB_CD_MSM6J2IG	41824	17665	0.422365	27741	0.663279	59458	1.42162
IBDMDB_CD_MSM6J2II	31242	12168	0.389476	20824	0.666539	39747	1.27223
IBDMDB_CD_MSM6J2IK	55023	23257	0.422678	37516	0.681824	76893	1.39747
IBDMDB_CD_MSM6J2IM	45437	18264	0.401963	30072	0.661839	63045	1.38753
IBDMDB_CD_MSM6J2IO	47868	21076	0.440294	32119	0.670991	70830	1.47969
IBDMDB_CD_MSM6J2IQ	43364	19757	0.455608	30331	0.699451	64465	1.4866
IBDMDB_CD_MSM6J2IY	50972	23859	0.468081	35398	0.69446	74897	1.46938
IBDMDB_CD_MSM6J2J1	45939	21994	0.478765	32251	0.70204	69811	1.51965
IBDMDB_CD_MSM6J2J3	43955	18530	0.421568	29115	0.662382	58603	1.33325
IBDMDB_CD_MSM6J2J5	53822	22432	0.416781	36193	0.672457	74365	1.38168
IBDMDB_CD_MSM6J2JB	23989	9992	0.416524	15680	0.653633	33720	1.40564
IBDMDB_CD_MSM6J2JD	45288	17733	0.391561	29731	0.656487	59673	1.31763
IBDMDB_CD_MSM6J2KC	27921	11201	0.401168	18385	0.658465	36655	1.31281
IBDMDB_CD_MSM6J2KE	22009	9117	0.41424	14663	0.666227	29236	1.32837
IBDMDB_CD_MSM6J2KM	23842	10163	0.426265	15959	0.669365	33057	1.3865
IBDMDB_CD_MSM6J2LB	11579	4846	0.418516	7702	0.66517	16040	1.38527
IBDMDB_CD_MSM6J2LH	31265	15479	0.49509	22838	0.730465	44900	1.43611
IBDMDB_CD_MSM6J2LJ	43550	22656	0.52023	32108	0.737268	64642	1.48432
IBDMDB_CD_MSM6J2LL	59798	31555	0.527693	45076	0.753804	88659	1.48264
IBDMDB_CD_MSM6J2LN	59799	31570	0.527935	44514	0.744394	88410	1.47845
IBDMDB_CD_MSM6J2LR	36667	17865	0.487223	26981	0.735839	52436	1.43006
IBDMDB_CD_MSM6J2LT	60459	27168	0.449362	41904	0.693098	90300	1.49357
IBDMDB_CD_MSM6J2MB	55604	28785	0.517679	41397	0.744497	82170	1.47777
IBDMDB_CD_MSM6J2MD	51233	27157	0.530069	38292	0.747409	76513	1.49343
IBDMDB_CD_MSM6J2MF	44150	24100	0.545866	32965	0.746659	67244	1.52308
IBDMDB_CD_MSM6J2MH	58076	30693	0.528497	43485	0.74876	87022	1.49842
IBDMDB_CD_MSM6J2MJ	24423	12625	0.516931	17887	0.732383	36212	1.4827
IBDMDB_CD_MSM6J2ML	38353	21588	0.562876	29472	0.768441	59726	1.55727
IBDMDB_CD_MSM6J2PK	50926	21698	0.426069	34407	0.675627	74252	1.45804
IBDMDB_CD_MSM6J2PM	55231	23631	0.427858	37026	0.670384	78821	1.42712
IBDMDB_CD_MSM6J2Q3	34376	14534	0.422795	22871	0.665319	49916	1.45206
IBDMDB_CD_MSM6J2Q5	45401	20206	0.445056	31173	0.686615	63849	1.40633
IBDMDB_CD_MSM6J2Q7	42733	17571	0.411181	28190	0.659678	59110	1.38324
IBDMDB_CD_MSM6J2Q9	40080	18333	0.45741	27005	0.673777	60564	1.51108
IBDMDB_CD_MSM6J2QB	42087	17575	0.417587	28050	0.666477	59465	1.41291
IBDMDB_CD_MSM6J2QD	42030	17957	0.427242	27885	0.663455	60637	1.44271
IBDMDB_CD_MSM6J2QR	51307	22513	0.43879	35308	0.688171	73534	1.43322
IBDMDB_CD_MSM6J2R2	23519	10446	0.444152	16063	0.68298	32927	1.40002
IBDMDB_CD_MSM6J2R8	28399	12266	0.431917	18774	0.66108	39374	1.38646
IBDMDB_CD_MSM6J2RA	32990	14124	0.42813	21741	0.659018	45239	1.37129
IBDMDB_CD_MSM6J2RC	37536	16477	0.438965	24885	0.662964	53657	1.42948
IBDMDB_CD_MSM79H63	40156	17099	0.425814	26671	0.664185	59357	1.47816
IBDMDB_CD_MSM79H65	46252	19436	0.42022	31158	0.673657	64859	1.4023
IBDMDB_CD_MSM79H67	17938	6967	0.388393	11315	0.630784	23943	1.33476
IBDMDB_CD_MSM79H69	37902	15704	0.414332	24801	0.654345	53469	1.41072
IBDMDB_CD_MSM79H6B	47293	21104	0.446239	31737	0.671072	70687	1.49466
IBDMDB_CD_MSM79H98	54670	23205	0.424456	36792	0.672983	78231	1.43097
IBDMDB_CD_MSM79HBN	20369	10707	0.525652	15384	0.755265	29899	1.46787
IBDMDB_CD_MSM79HBP	24914	11294	0.453319	17558	0.704744	33682	1.35193
IBDMDB_CD_MSM79HBR	23834	14372	0.603004	18927	0.794118	34677	1.45494
IBDMDB_CD_MSM79HBT	28498	16224	0.569303	22304	0.782651	42531	1.49242
IBDMDB_CD_MSM79HBV	31166	15474	0.496503	22665	0.727235	43578	1.39825
IBDMDB_CD_MSM79HDK	40959	18722	0.457091	28111	0.68632	58789	1.43531
IBDMDB_CD_MSM79HDM	32176	13039	0.40524	21291	0.661704	44150	1.37214
IBDMDB_CD_MSM79HDO	15622	5404	0.345922	10295	0.659007	19119	1.22385
IBDMDB_CD_MSM79HDQ	37817	14931	0.394822	24730	0.653939	50574	1.33734
IBDMDB_CD_MSM79HDQ_TR	22976	9528	0.414694	15083	0.656468	31823	1.38505
IBDMDB_CD_MSM79HDS	20194	7465	0.369664	12989	0.643211	26345	1.3046
IBDMDB_CD_MSM79HDU	37188	14517	0.390368	24339	0.654485	50833	1.36692
IBDMDB_CD_MSM7J16J	36328	15513	0.427026	24357	0.670475	50936	1.40211
IBDMDB_CD_MSM7J16L	45124	18931	0.419533	30271	0.67084	63497	1.40717
IBDMDB_CD_MSM7J16N	34754	14714	0.423376	23771	0.683979	47121	1.35584
IBDMDB_CD_MSM7J16P	48069	19824	0.412407	32413	0.674302	66524	1.38393
IBDMDB_CD_MSM7J16R	45546	19231	0.422232	30632	0.672551	64581	1.41793
IBDMDB_CD_MSM9VZEK	19027	7711	0.405266	12465	0.655122	26717	1.40416
IBDMDB_CD_MSM9VZEK_TR	12754	5168	0.405206	8147	0.63878	15790	1.23804
IBDMDB_CD_MSM9VZEM	28715	11635	0.405189	18982	0.661048	39742	1.38402
IBDMDB_CD_MSM9VZEO	34260	14224	0.415178	22931	0.669323	48961	1.4291
IBDMDB_CD_MSM9VZEQ	39423	16152	0.40971	26431	0.670446	56887	1.44299
IBDMDB_CD_MSM9VZES	40977	17946	0.437953	27581	0.673085	58905	1.43751
IBDMDB_CD_MSM9VZIY	38217	17537	0.45888	25943	0.678834	58162	1.52189
IBDMDB_CD_MSM9VZJ3	44192	19374	0.438405	29912	0.676865	64951	1.46975
IBDMDB_CD_MSM9VZJB	39752	16470	0.414319	26651	0.670432	55863	1.40529
IBDMDB_CD_MSM9VZPH	52109	23160	0.444453	35768	0.686407	75230	1.4437
IBDMDB_CD_MSM9VZPL	49988	22659	0.453289	34313	0.686425	73893	1.47821
IBDMDB_CD_MSM9VZPN	30949	13665	0.441533	21162	0.68377	45777	1.47911
IBDMDB_CD_MSMA26AL	25760	10269	0.398641	16809	0.652523	34518	1.33998
IBDMDB_CD_MSMA26AN	19317	7574	0.39209	12498	0.646995	25034	1.29596
IBDMDB_CD_MSMA26AP	37284	14229	0.381638	24309	0.651995	49326	1.32298
IBDMDB_CD_MSMA26AR	30998	11954	0.385638	20057	0.647042	40202	1.29692
IBDMDB_CD_MSMA26AT	37560	14665	0.390442	24756	0.659105	50290	1.33892
IBDMDB_CD_MSMA26CV	36021	16521	0.458649	24166	0.670886	55501	1.5408
IBDMDB_CD_MSMA26CX	40224	18025	0.448116	27195	0.676089	60329	1.49983
IBDMDB_CD_MSMAPC6A	41294	17875	0.432872	28123	0.681043	59505	1.44101
IBDMDB_CD_MSMAPC6C	33369	14702	0.440589	22428	0.672121	49549	1.48488
IBDMDB_CD_MSMAPC6E	42193	19120	0.453156	28454	0.674377	62849	1.48956
IBDMDB_CD_MSMAPC6G	49785	22799	0.457949	33630	0.675505	73937	1.48513
IBDMDB_CD_MSMB4LXY	78211	37099	0.474345	55513	0.709785	116119	1.48469
IBDMDB_CD_MSMB4LYB	47038	21425	0.455483	32516	0.691271	69109	1.46922
IBDMDB_CD_PSM6XBQS	34935	14942	0.427709	23746	0.679719	50709	1.45152
IBDMDB_CD_PSM6XBQU	49712	19555	0.393366	33465	0.673178	66828	1.3443
IBDMDB_CD_PSM6XBQY	7374	2431	0.329672	4696	0.636832	8999	1.22037
IBDMDB_CD_PSM6XBQY_TR	23751	9323	0.392531	16005	0.673866	32448	1.36617
IBDMDB_CD_PSM6XBR1	51551	20807	0.40362	34330	0.665942	72427	1.40496
IBDMDB_CD_PSM6XBRK	42331	18608	0.439583	29809	0.704188	61976	1.46408
IBDMDB_CD_PSM6XBRK_TR	35033	15167	0.432935	24555	0.700911	49685	1.41823
IBDMDB_CD_PSM6XBS4	53161	25422	0.478208	38183	0.718252	76769	1.44408
IBDMDB_CD_PSM6XBS8	34391	14949	0.434678	23496	0.683202	49210	1.4309
IBDMDB_CD_PSM6XBSA	45712	20879	0.456751	31951	0.698963	66259	1.44949
IBDMDB_CD_PSM6XBSI	37261	14998	0.402512	24222	0.650063	52721	1.41491
IBDMDB_CD_PSM6XBSK	39552	17363	0.438992	27043	0.683733	57004	1.44124
IBDMDB_CD_PSM6XBSM	44490	18886	0.4245	29924	0.672601	62178	1.39757
IBDMDB_CD_PSM6XBSO	11558	3951	0.341841	7316	0.632981	14045	1.21518
IBDMDB_CD_PSM6XBSS	58060	24675	0.424991	39422	0.678987	82267	1.41693
IBDMDB_CD_PSM6XBSU	43474	17915	0.412085	29225	0.672241	61484	1.41427
IBDMDB_CD_PSM6XBT1	29317	12228	0.417096	19660	0.670601	41208	1.4056
IBDMDB_CD_PSM6XBTL	57639	26779	0.464599	40772	0.707368	84541	1.46673
IBDMDB_CD_PSM6XBTP	48681	21278	0.43709	33756	0.693412	69348	1.42454
IBDMDB_CD_PSM6XBUG	41590	17772	0.427314	28556	0.686607	58652	1.41024
IBDMDB_CD_PSM6XBUI	5942	1806	0.303938	3701	0.622854	6545	1.10148
IBDMDB_CD_PSM6XBUK	51594	21539	0.417471	34423	0.66719	73521	1.42499
IBDMDB_CD_PSM6XBUM	60592	26168	0.431872	41099	0.678291	87083	1.4372
IBDMDB_CD_PSM6XBUO	50764	22427	0.441789	34407	0.677783	73678	1.45138
IBDMDB_CD_PSM6XBUQ	55345	24048	0.434511	37130	0.670883	79300	1.43283
IBDMDB_CD_PSM6XBV2	28400	11330	0.398944	18579	0.65419	38731	1.36377
IBDMDB_CD_PSM6XBV4	14034	5814	0.41428	9268	0.660396	19740	1.40658
IBDMDB_CD_PSM7J12J	11525	5686	0.493362	8646	0.750195	16672	1.44659
IBDMDB_CD_PSM7J12R	15860	8074	0.509079	11586	0.730517	24679	1.55605
IBDMDB_CD_PSM7J136	43529	18211	0.418365	29248	0.67192	62948	1.44612
IBDMDB_CD_PSM7J13E	43719	17756	0.406139	29412	0.672751	60166	1.3762
IBDMDB_CD_PSM7J13I	44686	18761	0.419841	29921	0.669583	65045	1.4556
IBDMDB_CD_PSM7J13K	31729	13380	0.421696	20859	0.657411	47862	1.50846
IBDMDB_CD_PSM7J13M	37938	16606	0.437714	25931	0.68351	57227	1.50843
IBDMDB_CD_PSM7J13Q	41035	18228	0.444206	28199	0.687194	62151	1.51459
IBDMDB_CD_PSM7J13Y	47373	22227	0.469191	33224	0.701328	73351	1.54837
IBDMDB_CD_PSM7J141	43137	20982	0.486404	30374	0.704129	68275	1.58275
IBDMDB_CD_PSM7J14L	34139	20195	0.591552	26523	0.776912	50698	1.48505
IBDMDB_CD_PSM7J14N	37903	18137	0.478511	27113	0.715326	54689	1.44287
IBDMDB_CD_PSM7J14P	46264	19746	0.426811	31171	0.673764	65979	1.42614
IBDMDB_CD_PSM7J14R	69117	29646	0.428925	47390	0.685649	96418	1.395
IBDMDB_CD_PSM7J14T	30437	12630	0.414955	20033	0.658179	40585	1.33341
IBDMDB_CD_PSM7J158	50329	19520	0.387848	32739	0.6505	68719	1.3654
IBDMDB_CD_PSM7J15A	45641	20438	0.447799	31684	0.6942	66668	1.4607
IBDMDB_CD_PSM7J15G	38464	17399	0.452345	26190	0.680896	56454	1.46771
IBDMDB_CD_PSM7J15I	38065	16267	0.427348	25891	0.680179	53649	1.4094
IBDMDB_CD_PSM7J15W	36665	14275	0.389336	24452	0.666903	50389	1.37431
IBDMDB_CD_PSM7J161	43014	27311	0.634933	33592	0.780955	67709	1.57412
IBDMDB_CD_PSM7J163	32404	21596	0.666461	25513	0.787341	51761	1.59736
IBDMDB_CD_PSM7J177	8	0	0	0	0	0	0
IBDMDB_CD_PSM7J179	3652	1515	0.414841	2092	0.572837	4839	1.32503
IBDMDB_CD_PSM7J17B	4080	2380	0.583333	3216	0.788235	6544	1.60392
IBDMDB_CD_PSM7J17D	3504	1881	0.536815	2882	0.822489	5301	1.51284
IBDMDB_CD_PSM7J17F	5116	4094	0.800235	4445	0.868843	9024	1.76388
IBDMDB_CD_PSM7J17L	57839	25486	0.440637	39439	0.681876	83833	1.44942
IBDMDB_CD_PSM7J17T	43250	18926	0.437595	29583	0.684	62227	1.43877
IBDMDB_CD_PSM7J18E	44930	19500	0.434008	30061	0.669063	63542	1.41424
IBDMDB_CD_PSM7J18G	42060	18570	0.441512	28760	0.683785	60220	1.43176
IBDMDB_CD_PSM7J18I	46263	20344	0.439747	31846	0.688369	65624	1.4185
IBDMDB_CD_PSM7J18K	29869	12664	0.423985	20474	0.68546	41735	1.39727
IBDMDB_CD_PSM7J18M	39991	17108	0.427796	26855	0.671526	57995	1.4502
IBDMDB_CD_PSM7J199	44005	19334	0.439359	29575	0.672083	64333	1.46195
IBDMDB_CD_PSM7J19B	56303	23737	0.421594	37638	0.66849	79935	1.41973
IBDMDB_CD_PSM7J19F	14723	5570	0.37832	9208	0.625416	19511	1.32521
IBDMDB_CD_PSM7J19H	15850	6278	0.396088	10349	0.652934	21449	1.35325
IBDMDB_CD_PSM7J19J	49126	21215	0.431849	33514	0.682205	70178	1.42853
IBDMDB_CD_PSM7J1BJ	13093	7509	0.573513	10474	0.799969	18336	1.40044
IBDMDB_CD_PSM7J1BL	6525	4769	0.730881	5441	0.83387	10662	1.63402
IBDMDB_CD_PSM7J1BP	17546	10739	0.612048	14008	0.798359	25948	1.47886
IBDMDB_CD_PSM7J1BR	11748	6110	0.520089	8840	0.752469	17956	1.52843
IBDMDB_CD_PSM7J1C8	46012	20469	0.444862	31852	0.692254	67514	1.46731
IBDMDB_CD_PSM7J1CC	48566	20156	0.415023	32814	0.675658	67551	1.39091
IBDMDB_CD_PSM7J1CG	43600	19667	0.451078	29839	0.684381	65995	1.51365
IBDMDB_CD_PSM7J1CI	53507	23245	0.434429	36793	0.68763	78184	1.46119
IBDMDB_CD_PSM7J1CU	41528	19397	0.467082	29571	0.712074	61216	1.47409
IBDMDB_CD_PSM7J4EF	4081	1460	0.357755	2690	0.659152	5163	1.26513
IBDMDB_CD_PSMA263M	36570	17951	0.490867	27009	0.738556	53835	1.47211
IBDMDB_CD_PSMA263S	26444	13638	0.515731	19488	0.736954	40051	1.51456
IBDMDB_CD_PSMA263U	23759	12984	0.546488	17598	0.740688	37237	1.56728
IBDMDB_CD_PSMA263W	18975	8777	0.462556	13444	0.708511	27897	1.4702
IBDMDB_CD_PSMA2653	37426	16438	0.439213	25556	0.682841	54895	1.46676
IBDMDB_CD_PSMA2659	47235	21217	0.44918	32652	0.691267	71075	1.50471
IBDMDB_CD_PSMA265B	25064	10782	0.430179	16742	0.66797	37334	1.48955
IBDMDB_CD_PSMA265N	23109	10057	0.435198	15689	0.678913	32764	1.4178
IBDMDB_CD_PSMA265T	48466	20276	0.418355	32540	0.671399	68452	1.41237
IBDMDB_CD_PSMA2668	38903	23321	0.599465	30148	0.774953	58526	1.50441
IBDMDB_CD_PSMA266I	41517	16374	0.394393	27698	0.667148	55358	1.33338
IBDMDB_CD_PSMA266M	62120	25969	0.418046	42391	0.682405	85191	1.37139
IBDMDB_CD_PSMA266O	39251	17290	0.440498	26642	0.67876	57238	1.45826
IBDMDB_CD_PSMA266Q	25935	10636	0.410102	17432	0.672142	35862	1.38276
IBDMDB_CD_PSMA267D	37363	16400	0.438937	25602	0.685223	56284	1.50641
IBDMDB_CD_PSMA267F	37347	15140	0.405387	24734	0.662275	52544	1.40691
IBDMDB_CD_PSMA267H	29422	12132	0.412345	19576	0.665352	42370	1.44008
IBDMDB_CD_PSMA269G	28269	11026	0.390039	18306	0.647564	37314	1.31996
IBDMDB_CD_PSMA269O	43631	18637	0.42715	29410	0.674062	61204	1.40276
IBDMDB_CD_PSMB4MBS	39205	16341	0.416809	25971	0.662441	54691	1.395
IBDMDB_nonIBD_CSM67UH7	36991	15959	0.431429	25042	0.676975	52146	1.40969
IBDMDB_nonIBD_CSM79HGX	33012	13031	0.394735	22343	0.676814	43809	1.32706
IBDMDB_nonIBD_CSM79HGZ	48701	20630	0.423605	33107	0.679801	68572	1.40802
IBDMDB_nonIBD_CSM79HOV	32733	12115	0.370116	20962	0.640393	41491	1.26756
IBDMDB_nonIBD_CSM79HOX	56375	23906	0.424053	38095	0.675743	78614	1.39448
IBDMDB_nonIBD_CSM79HOZ	58619	25778	0.439755	39812	0.679165	85253	1.45436
IBDMDB_nonIBD_CSM79HP2	77492	34500	0.445207	52718	0.680302	112705	1.45441
IBDMDB_nonIBD_CSM79HP4	40253	16817	0.417783	27482	0.682732	55325	1.37443
IBDMDB_nonIBD_CSM79HP6	59509	24840	0.417416	40317	0.677494	82195	1.38122
IBDMDB_nonIBD_CSM7KOOH	49577	22531	0.454465	33698	0.67971	72150	1.45531
IBDMDB_nonIBD_CSM7KOOJ	65159	28607	0.439034	44409	0.681548	93154	1.42964
IBDMDB_nonIBD_CSM7KOOL	49925	21266	0.425959	33538	0.671768	70889	1.41991
IBDMDB_nonIBD_CSM7KOON	54215	23200	0.427926	36806	0.67889	76323	1.40778
IBDMDB_nonIBD_CSM7KOOP	56379	24527	0.435038	38569	0.684102	78890	1.39928
IBDMDB_nonIBD_CSMA8M9R	69993	30348	0.433586	47460	0.678068	100198	1.43154
IBDMDB_nonIBD_CSMAAEUA	59935	25643	0.427847	40633	0.677951	85480	1.42621
IBDMDB_nonIBD_CSMAE44D	60700	25170	0.414662	40214	0.662504	83766	1.38
IBDMDB_nonIBD_CSMAG78W	41866	18630	0.444991	28483	0.680337	59420	1.41929
IBDMDB_nonIBD_CSMAHYLR	37931	16666	0.439377	25578	0.67433	54830	1.44552
IBDMDB_nonIBD_HSM5MD5B	63075	29930	0.474514	44490	0.705351	89325	1.41617
IBDMDB_nonIBD_HSM5MD5D	57761	25006	0.432922	40110	0.694413	80471	1.39317
IBDMDB_nonIBD_HSM5MD6I	36347	16107	0.443145	24709	0.679809	52472	1.44364
IBDMDB_nonIBD_HSM5MD6K	37476	16565	0.442016	25824	0.689081	53621	1.43081
IBDMDB_nonIBD_HSM5MD6M	24131	10917	0.452406	16462	0.682193	35252	1.46086
IBDMDB_nonIBD_HSM5MD6Q	32249	14559	0.451456	21976	0.681447	49072	1.52166
IBDMDB_nonIBD_HSM5MD6W	25650	11590	0.451852	17514	0.682807	39454	1.53817
IBDMDB_nonIBD_HSM67VDT	44287	18642	0.420936	30080	0.679206	65092	1.46978
IBDMDB_nonIBD_HSM67VEO	38648	17211	0.445327	26097	0.675248	56458	1.46083
IBDMDB_nonIBD_HSM67VEQ	49844	20307	0.407411	33892	0.679961	67948	1.36321
IBDMDB_nonIBD_HSM67VES	57336	24592	0.42891	38676	0.67455	81628	1.42368
IBDMDB_nonIBD_HSM67VEU	51443	23226	0.45149	35047	0.681278	74962	1.45719
IBDMDB_nonIBD_HSM67VEW	38469	16554	0.430321	26408	0.686475	54347	1.41275
IBDMDB_nonIBD_HSM67VF3	30942	14551	0.470267	21010	0.679012	49660	1.60494
IBDMDB_nonIBD_HSM67VFR	23055	10520	0.4563	15095	0.654739	35403	1.53559
IBDMDB_nonIBD_HSM67VFX	42608	18058	0.423817	29137	0.683839	57202	1.34252
IBDMDB_nonIBD_HSM67VFZ	59927	26045	0.434612	41308	0.689305	84576	1.41132
IBDMDB_nonIBD_HSM67VG8	54826	23503	0.428683	36968	0.674279	78766	1.43665
IBDMDB_nonIBD_HSM67VGA	37424	14628	0.390872	25013	0.668368	50691	1.35451
IBDMDB_nonIBD_HSM67VGC	46219	20192	0.436877	31225	0.675588	67293	1.45596
IBDMDB_nonIBD_HSM67VGG	42690	17274	0.404638	28541	0.668564	59168	1.38599
IBDMDB_nonIBD_HSM67VGK	28564	12934	0.452808	19474	0.681767	41327	1.44682
IBDMDB_nonIBD_HSM67VGK_TR	30777	14131	0.459142	20911	0.679436	45089	1.46502
IBDMDB_nonIBD_HSM67VI3	44106	18040	0.409015	29473	0.668231	61809	1.40137
IBDMDB_nonIBD_HSM67VI5	55913	23344	0.417506	37892	0.677696	79251	1.4174
IBDMDB_nonIBD_HSM67VI7	41206	16626	0.403485	27440	0.665922	57843	1.40375
IBDMDB_nonIBD_HSM67VI9	55978	23796	0.425096	37846	0.676087	81097	1.44873
IBDMDB_nonIBD_HSM67VIB	47489	19902	0.419087	31843	0.670534	68376	1.43983
IBDMDB_nonIBD_HSM6XRQ8	35847	15198	0.423969	24270	0.677044	48217	1.34508
IBDMDB_nonIBD_HSM6XRQS	28393	13237	0.466206	19172	0.675237	45569	1.60494
IBDMDB_nonIBD_HSM6XRQU	32635	14914	0.456994	22052	0.675716	50787	1.55621
IBDMDB_nonIBD_HSM6XRQW	24304	10648	0.438117	16039	0.659933	36350	1.49564
IBDMDB_nonIBD_HSM6XRQY	24441	11017	0.450759	16063	0.657215	38249	1.56495
IBDMDB_nonIBD_HSM6XRRJ	25028	10781	0.430758	16496	0.659102	36525	1.45937
IBDMDB_nonIBD_HSM6XRSX	56899	26442	0.464718	40017	0.703299	79445	1.39625
IBDMDB_nonIBD_HSM6XRT8	40251	17201	0.427343	26878	0.66776	57386	1.4257
IBDMDB_nonIBD_HSM6XRTG	22920	9107	0.397339	14945	0.652051	30756	1.34188
IBDMDB_nonIBD_HSM6XRUL	44326	17658	0.398367	28770	0.649055	60706	1.36953
IBDMDB_nonIBD_HSM6XRUN	37399	16761	0.448167	24942	0.666916	55226	1.47667
IBDMDB_nonIBD_HSM6XRUR	16657	6866	0.412199	10852	0.651498	22445	1.34748
IBDMDB_nonIBD_HSM6XRVA	30185	12778	0.423323	20175	0.668378	42470	1.40699
IBDMDB_nonIBD_HSM6XRVC	42985	18849	0.438502	29181	0.678865	61135	1.42224
IBDMDB_nonIBD_HSM6XRVC_TR	37645	16637	0.441944	25602	0.68009	53577	1.42322
IBDMDB_nonIBD_HSM6XRVK	36766	16458	0.447642	25448	0.692161	52077	1.41644
IBDMDB_nonIBD_HSM7CYXE	24899	11443	0.459577	17034	0.684124	39484	1.58577
IBDMDB_nonIBD_HSM7CYXG	29224	13406	0.458733	20142	0.689228	45346	1.55167
IBDMDB_nonIBD_HSM7CYXI	15684	6718	0.428335	10621	0.677187	23155	1.47635
IBDMDB_nonIBD_HSM7CYXO	25984	12258	0.471752	17818	0.68573	42036	1.61776
IBDMDB_nonIBD_HSM7CYYF	24500	11384	0.464653	16476	0.67249	37181	1.51759
IBDMDB_nonIBD_HSM7CYYH	39267	20202	0.514478	27466	0.699468	61229	1.5593
IBDMDB_nonIBD_HSM7CYYP	18724	8565	0.457434	12046	0.643345	29464	1.5736
IBDMDB_nonIBD_HSM7CYZJ	57660	25322	0.439161	39580	0.686438	83563	1.44924
IBDMDB_nonIBD_HSM7CYZL	45715	19913	0.43559	31344	0.685639	65577	1.43447
IBDMDB_nonIBD_HSM7CYZR	61717	26726	0.433041	42447	0.687768	86941	1.4087
IBDMDB_nonIBD_HSM7CZ16	19214	7990	0.415843	12944	0.673675	26020	1.35422
IBDMDB_nonIBD_HSM7CZ18	24533	10270	0.41862	16242	0.662047	33083	1.34851
IBDMDB_nonIBD_HSM7CZ1A	64101	27047	0.421943	43194	0.673843	88245	1.37666
IBDMDB_nonIBD_HSM7CZ1C	71647	31011	0.43283	48163	0.672226	101177	1.41216
IBDMDB_nonIBD_HSM7CZ1E	18496	7709	0.416793	11876	0.642085	25509	1.37916
IBDMDB_nonIBD_HSM7CZ1G	26620	11209	0.421074	17766	0.667393	36195	1.35969
IBDMDB_nonIBD_HSM7CZ24	38454	15213	0.395616	25701	0.668357	52891	1.37544
IBDMDB_nonIBD_HSM7CZ26	44785	18715	0.417885	30018	0.670269	63670	1.42168
IBDMDB_nonIBD_HSM7CZ28	49993	20743	0.414918	33900	0.678095	70448	1.40916
IBDMDB_nonIBD_HSM7CZ2A	36143	14130	0.390947	23726	0.656448	50055	1.38492
IBDMDB_nonIBD_HSM7CZ2E	44423	18324	0.412489	29886	0.67276	63068	1.41972
IBDMDB_nonIBD_HSM7CZ2H	26563	9781	0.368219	16806	0.632685	33466	1.25987
IBDMDB_nonIBD_HSM7J4G1	26947	12077	0.448176	18167	0.674175	40587	1.50618
IBDMDB_nonIBD_HSM7J4G8	45430	19442	0.427955	30786	0.677658	63414	1.39586
IBDMDB_nonIBD_HSM7J4HA	28603	11173	0.390623	18517	0.64738	37049	1.29528
IBDMDB_nonIBD_HSM7J4HC	39819	16079	0.403802	26544	0.666616	53518	1.34403
IBDMDB_nonIBD_HSM7J4HE	24640	10110	0.410308	15998	0.649269	32731	1.32837
IBDMDB_nonIBD_HSM7J4HG	25472	10274	0.403345	16785	0.658959	33544	1.3169
IBDMDB_nonIBD_HSM7J4HI	43641	17649	0.404413	29142	0.667767	56567	1.29619
IBDMDB_nonIBD_HSM7J4HK	43469	17035	0.391888	28561	0.657043	56472	1.29913
IBDMDB_nonIBD_HSM7J4HW	53937	22408	0.415448	36020	0.667816	76633	1.42079
IBDMDB_nonIBD_HSM7J4HY	43373	18397	0.424158	29370	0.677149	64060	1.47696
IBDMDB_nonIBD_HSM7J4I3	37223	17623	0.473444	25653	0.689171	58307	1.56642
IBDMDB_nonIBD_HSM7J4I5	46303	19324	0.417338	31299	0.675961	65747	1.41993
IBDMDB_nonIBD_HSM7J4I7	45313	19187	0.423433	30360	0.670006	65341	1.44199
IBDMDB_nonIBD_HSM7J4I9	49325	20966	0.425058	33228	0.673654	70925	1.43791
IBDMDB_nonIBD_HSM7J4IU	47906	21087	0.440175	33136	0.691688	68598	1.43193
IBDMDB_nonIBD_HSM7J4IW	39220	16524	0.421316	26519	0.67616	54494	1.38944
IBDMDB_nonIBD_HSM7J4KC	20615	8507	0.412661	13374	0.648751	28201	1.36798
IBDMDB_nonIBD_HSM7J4KG	29322	12514	0.426779	19514	0.665507	39972	1.36321
IBDMDB_nonIBD_HSM7J4KI	52487	21976	0.418694	35101	0.668756	72447	1.38028
IBDMDB_nonIBD_HSM7J4KK	65546	27652	0.421872	44766	0.682971	90574	1.38184
IBDMDB_nonIBD_HSM7J4KM	34754	15047	0.432957	23463	0.675117	48147	1.38537
IBDMDB_nonIBD_HSM7J4KO	29649	13530	0.456339	20666	0.697022	45455	1.5331
IBDMDB_nonIBD_HSM7J4KQ	38986	18291	0.469168	27262	0.699277	60221	1.54468
IBDMDB_nonIBD_HSM7J4LD	23112	10673	0.461795	15108	0.653686	35735	1.54617
IBDMDB_nonIBD_HSM7J4LF	22172	10580	0.477178	14873	0.670801	34295	1.54677
IBDMDB_nonIBD_HSM7J4LN	32566	15305	0.469969	22368	0.686851	48688	1.49506
IBDMDB_nonIBD_HSM7J4NY	56463	24063	0.426173	37925	0.671679	80300	1.42217
IBDMDB_nonIBD_HSM7J4O1	55141	23167	0.420141	37233	0.675233	80498	1.45986
IBDMDB_nonIBD_HSM7J4O3	58844	25440	0.43233	39634	0.673544	86785	1.47483
IBDMDB_nonIBD_HSM7J4O5	48931	20710	0.423249	32919	0.672764	71309	1.45734
IBDMDB_nonIBD_HSM7J4O7	71759	31797	0.443108	49531	0.690241	106517	1.48437
IBDMDB_nonIBD_HSM7J4O9	61980	26743	0.431478	41802	0.674443	90277	1.45655
IBDMDB_nonIBD_HSM7J4QZ	55794	25282	0.453131	38767	0.694824	78486	1.40671
IBDMDB_nonIBD_HSM7J4R2	43710	18464	0.42242	29773	0.681148	60139	1.37586
IBDMDB_nonIBD_HSM7J4RE	50761	22028	0.433955	34788	0.685329	71935	1.41713
IBDMDB_nonIBD_HSMA33J3	34900	13338	0.382178	22759	0.65212	45639	1.30771
IBDMDB_nonIBD_HSMA33J5	32475	13941	0.429284	22429	0.690654	44290	1.36382
IBDMDB_nonIBD_HSMA33J7	41322	17939	0.434127	28208	0.682639	58747	1.42169
IBDMDB_nonIBD_HSMA33J9	40964	17175	0.419271	28018	0.683966	54382	1.32756
IBDMDB_nonIBD_HSMA33MS	29687	11883	0.400276	19852	0.66871	39378	1.32644
IBDMDB_nonIBD_HSMA33NY	38536	17970	0.466317	26954	0.69945	54245	1.40764
IBDMDB_nonIBD_HSMA33QM	51289	22338	0.435532	35464	0.691454	70242	1.36953
IBDMDB_nonIBD_HSMA33QO	19925	7776	0.390263	12675	0.636136	26088	1.30931
IBDMDB_nonIBD_HSMA33SE	61147	27499	0.44972	42653	0.697549	86323	1.41173
IBDMDB_nonIBD_HSMA33SG	30677	13179	0.429605	21091	0.687518	40409	1.31724
IBDMDB_nonIBD_HSMA33SI	37836	17696	0.467703	25604	0.67671	52451	1.38627
IBDMDB_nonIBD_HSMA33SK	50653	21192	0.418376	34325	0.67765	66458	1.31202
IBDMDB_nonIBD_MSM6J2HN	46476	20800	0.447543	32054	0.689689	68441	1.47261
IBDMDB_nonIBD_MSM6J2HP	45803	18746	0.409275	31437	0.686352	62369	1.36168
IBDMDB_nonIBD_MSM6J2HR	55735	24728	0.443671	38853	0.697102	81697	1.46581
IBDMDB_nonIBD_MSM6J2HT	46500	21112	0.454022	32033	0.688882	71898	1.54619
IBDMDB_nonIBD_MSM6J2JN	49682	21631	0.435389	33844	0.681213	73244	1.47426
IBDMDB_nonIBD_MSM6J2JP	23557	9157	0.388717	15136	0.642527	32194	1.36664
IBDMDB_nonIBD_MSM6J2JR	44207	18820	0.425724	29880	0.675911	63813	1.4435
IBDMDB_nonIBD_MSM6J2JT	35198	15114	0.429399	23855	0.677737	51808	1.4719
IBDMDB_nonIBD_MSM6J2JZ	44789	17210	0.384246	29069	0.649021	56474	1.26089
IBDMDB_nonIBD_MSM6J2K2	39945	15237	0.381449	26016	0.651296	49382	1.23625
IBDMDB_nonIBD_MSM6J2K4	65122	26866	0.412549	43426	0.666841	88554	1.35982
IBDMDB_nonIBD_MSM6J2K6	52604	21452	0.407802	34979	0.664949	70786	1.34564
IBDMDB_nonIBD_MSM6J2K8	35016	14370	0.410384	23242	0.663754	46319	1.3228
IBDMDB_nonIBD_MSM6J2KA	62283	25112	0.403192	41802	0.671162	81575	1.30975
IBDMDB_nonIBD_MSM6J2LV	46559	20920	0.449322	31637	0.679503	71984	1.54608
IBDMDB_nonIBD_MSM6J2LW	76527	31584	0.412717	51251	0.669711	102120	1.33443
IBDMDB_nonIBD_MSM6J2LY	58676	23194	0.395289	38024	0.648033	78733	1.34183
IBDMDB_nonIBD_MSM6J2M3	76930	32894	0.427584	51828	0.673703	105026	1.36522
IBDMDB_nonIBD_MSM6J2PO	26724	11408	0.426882	17796	0.665918	36923	1.38164
IBDMDB_nonIBD_MSM6J2PS	68541	31026	0.452663	47354	0.690886	95929	1.39959
IBDMDB_nonIBD_MSM6J2PU	13867	6010	0.433403	9292	0.67008	18001	1.29812
IBDMDB_nonIBD_MSM6J2PW	27375	12211	0.446064	18792	0.686466	37845	1.38247
IBDMDB_nonIBD_MSM6J2Q1	64478	26995	0.41867	43301	0.671562	89223	1.38377
IBDMDB_nonIBD_MSM6J2QF	42845	18186	0.42446	29071	0.678516	61728	1.44073
IBDMDB_nonIBD_MSM6J2QH	56026	24020	0.42873	38647	0.689805	80219	1.43182
IBDMDB_nonIBD_MSM6J2QJ	33316	13852	0.415776	22663	0.680244	45278	1.35905
IBDMDB_nonIBD_MSM6J2QL	41875	17448	0.416669	28333	0.676609	59294	1.41598
IBDMDB_nonIBD_MSM6J2QP	52047	23013	0.442158	35812	0.68807	79694	1.53119
IBDMDB_nonIBD_MSM6J2RK	72742	29402	0.404196	47478	0.65269	93925	1.29121
IBDMDB_nonIBD_MSM6J2RM	44191	19094	0.432079	29928	0.677242	62343	1.41076
IBDMDB_nonIBD_MSM6J2RO	48000	18386	0.383042	31103	0.647979	60452	1.25942
IBDMDB_nonIBD_MSM6J2RQ	79256	31413	0.396349	52784	0.665994	101991	1.28686
IBDMDB_nonIBD_MSM6J2RS	19036	6826	0.358584	11904	0.625341	23267	1.22226
IBDMDB_nonIBD_MSM6J2RU	77803	32696	0.420241	52244	0.671491	105339	1.35392
IBDMDB_nonIBD_MSM6J2SE	51361	23416	0.45591	35001	0.68147	78701	1.53231
IBDMDB_nonIBD_MSM6J2SI	43751	17694	0.404425	29359	0.671048	61575	1.4074
IBDMDB_nonIBD_MSM6J2SK	36689	15549	0.423806	24856	0.677478	55396	1.50988
IBDMDB_nonIBD_MSM79H54	40802	16413	0.40226	26758	0.655801	54248	1.32954
IBDMDB_nonIBD_MSM79H58	44101	18364	0.416408	30082	0.682116	59153	1.34131
IBDMDB_nonIBD_MSM79H5A	34913	14329	0.41042	23265	0.666371	46678	1.33698
IBDMDB_nonIBD_MSM79H5E	49209	20380	0.414152	32406	0.658538	64472	1.31017
IBDMDB_nonIBD_MSM79H5G	43683	18025	0.412632	28708	0.657189	56961	1.30396
IBDMDB_nonIBD_MSM79H5K	72534	32042	0.441751	48983	0.675311	98233	1.3543
IBDMDB_nonIBD_MSM79H5M	67167	28686	0.427085	44899	0.668468	88675	1.32022
IBDMDB_nonIBD_MSM79H5Q	45246	19651	0.434315	31109	0.687552	66666	1.47341
IBDMDB_nonIBD_MSM79H5S	44408	19462	0.438254	30219	0.680485	64629	1.45535
IBDMDB_nonIBD_MSM79H5U	35923	14160	0.394176	24235	0.674637	47762	1.32957
IBDMDB_nonIBD_MSM79H5Y	52376	23740	0.453261	36423	0.695414	77875	1.48685
IBDMDB_nonIBD_MSM79H6D	73773	30736	0.416629	49481	0.67072	98781	1.33899
IBDMDB_nonIBD_MSM79H6F	3812	797	0.209077	1757	0.460913	2973	0.779906
IBDMDB_nonIBD_MSM79H6H	51951	20733	0.399088	33743	0.649516	69100	1.3301
IBDMDB_nonIBD_MSM79H6J	66479	27284	0.410415	44160	0.66427	88200	1.32673
IBDMDB_nonIBD_MSM79H6L	66353	25406	0.382892	43313	0.652766	86903	1.30971
IBDMDB_nonIBD_MSM79H6N	76362	30455	0.398824	50338	0.659202	102257	1.33911
IBDMDB_nonIBD_MSM79H6Y	28076	11141	0.396816	18644	0.664055	37221	1.32572
IBDMDB_nonIBD_MSM79H7O	59232	24808	0.418828	40124	0.677404	80853	1.36502
IBDMDB_nonIBD_MSM79H7Q	67961	30024	0.441783	46935	0.690617	94899	1.39637
IBDMDB_nonIBD_MSM79H7W	49932	21742	0.435432	34634	0.693623	69285	1.38759
IBDMDB_nonIBD_MSM79H7Y	67100	29128	0.434098	45967	0.685052	92964	1.38545
IBDMDB_nonIBD_MSM79H81	41791	19304	0.461918	29628	0.708956	59892	1.43313
IBDMDB_nonIBD_MSM79H83	40130	18537	0.461924	28371	0.706977	57900	1.44281
IBDMDB_nonIBD_MSM79H85	37539	17905	0.476971	26129	0.696049	55380	1.47527
IBDMDB_nonIBD_MSM79H87	31786	14179	0.446077	21777	0.685113	45405	1.42846
IBDMDB_nonIBD_MSM79H89	29784	13101	0.439867	20513	0.688725	42163	1.41563
IBDMDB_nonIBD_MSM79H8B	30894	14173	0.458762	21283	0.688904	45539	1.47404
IBDMDB_nonIBD_MSM79H8D	54855	24424	0.445247	38021	0.693118	81787	1.49097
IBDMDB_nonIBD_MSM79H8F	30322	14036	0.462898	20722	0.683398	48562	1.60154
IBDMDB_nonIBD_MSM79H8H	40504	16824	0.415366	27839	0.687315	55384	1.36737
IBDMDB_nonIBD_MSM79H8L	40378	17757	0.439769	27714	0.686364	61032	1.51152
IBDMDB_nonIBD_MSM79H8N	32342	13735	0.42468	21848	0.67553	45034	1.39243
IBDMDB_nonIBD_MSM79H9A	41534	17632	0.42452	27458	0.661097	58770	1.41499
IBDMDB_nonIBD_MSM79H9C	41475	17029	0.410585	28025	0.675708	56089	1.35236
IBDMDB_nonIBD_MSM79H9G	52629	21844	0.415056	35507	0.674666	71044	1.3499
IBDMDB_nonIBD_MSM79H9K	49303	21404	0.434132	34202	0.69371	68197	1.38322
IBDMDB_nonIBD_MSM79H9M	64067	28478	0.444503	44046	0.687499	87726	1.36929
IBDMDB_nonIBD_MSM79H9Q	39843	17404	0.436814	26742	0.671184	53629	1.34601
IBDMDB_nonIBD_MSM79H9W	62316	26764	0.429488	41608	0.667694	84004	1.34803
IBDMDB_nonIBD_MSM79H9Y	79412	31428	0.395759	53258	0.670654	102790	1.29439
IBDMDB_nonIBD_MSM79HA1	68863	25952	0.376864	45514	0.660935	88215	1.28102
IBDMDB_nonIBD_MSM79HA3	43246	16140	0.373214	27721	0.641007	54360	1.25699
IBDMDB_nonIBD_MSM79HA7	60875	24134	0.396452	40048	0.657873	79054	1.29863
IBDMDB_nonIBD_MSM79HAH	36033	14775	0.410041	24045	0.667305	49779	1.38148
IBDMDB_nonIBD_MSM79HB6	47703	20999	0.440203	32335	0.67784	71579	1.50051
IBDMDB_nonIBD_MSM79HBB	58286	25739	0.441598	40060	0.687301	81621	1.40035
IBDMDB_nonIBD_MSM79HBL	47615	18667	0.39204	31107	0.653303	64577	1.35623
IBDMDB_nonIBD_MSM79HC4	54246	23690	0.436714	36826	0.67887	73758	1.35969
IBDMDB_nonIBD_MSM79HC8	54527	23982	0.439819	37319	0.684413	75271	1.38044
IBDMDB_nonIBD_MSM79HCG	28790	12601	0.437687	19904	0.691351	41080	1.42688
IBDMDB_nonIBD_MSM79HCI	31540	14415	0.457039	21826	0.69201	45992	1.45821
IBDMDB_nonIBD_MSM79HCK	28442	12461	0.43812	19172	0.674074	40418	1.42107
IBDMDB_nonIBD_MSM79HCP	38360	17718	0.461887	26781	0.698149	55985	1.45946
IBDMDB_nonIBD_MSM79HCR	18807	8005	0.425639	12571	0.668421	27034	1.43744
IBDMDB_nonIBD_MSM79HES	62172	26988	0.434086	43055	0.692514	87160	1.40192
IBDMDB_nonIBD_MSM79HEU	40204	16580	0.412397	26764	0.665705	57739	1.43615
IBDMDB_nonIBD_MSM79HEW	22325	8767	0.392699	14512	0.650034	29946	1.34137
IBDMDB_nonIBD_MSM79HEY	38832	16721	0.430598	26963	0.69435	56308	1.45004
IBDMDB_nonIBD_MSM79HFW	53039	21227	0.400215	34712	0.654462	71058	1.33973
IBDMDB_nonIBD_MSM79HFY	66872	27816	0.415959	44645	0.667619	93490	1.39804
IBDMDB_nonIBD_MSM9VZF7	53268	22710	0.426335	35238	0.661523	76482	1.4358
IBDMDB_nonIBD_MSM9VZFF	60477	25295	0.418258	40682	0.672685	81892	1.3541
IBDMDB_nonIBD_MSM9VZFH	51025	21394	0.419285	34697	0.68	70235	1.37648
IBDMDB_nonIBD_MSM9VZFL	39986	17517	0.438078	27722	0.693293	58753	1.46934
IBDMDB_nonIBD_MSM9VZFN	37508	16312	0.434894	25821	0.688413	54925	1.46435
IBDMDB_nonIBD_MSM9VZFR	36063	15034	0.416882	24733	0.685828	51436	1.42628
IBDMDB_nonIBD_MSM9VZFT	37194	15608	0.419638	25731	0.691805	51720	1.39055
IBDMDB_nonIBD_MSM9VZGO	38218	15604	0.408289	25362	0.663614	47999	1.25593
IBDMDB_nonIBD_MSM9VZGS	26230	10989	0.418948	17012	0.64857	32486	1.23851
IBDMDB_nonIBD_MSM9VZGU	31425	12733	0.405187	20207	0.643023	38532	1.22616
IBDMDB_nonIBD_MSM9VZGW	42785	20342	0.475447	30244	0.706883	59372	1.38768
IBDMDB_nonIBD_MSM9VZGY	26916	11167	0.414883	18259	0.67837	36734	1.36476
IBDMDB_nonIBD_MSM9VZH7	28488	12304	0.431901	19675	0.690642	38509	1.35176
IBDMDB_nonIBD_MSM9VZHB	44999	21189	0.470877	30823	0.684971	61997	1.37774
IBDMDB_nonIBD_MSM9VZHF	28888	11961	0.414047	17904	0.619773	35550	1.23061
IBDMDB_nonIBD_MSM9VZHJ	36860	16480	0.447097	25508	0.692024	53530	1.45225
IBDMDB_nonIBD_MSM9VZHL	16852	7496	0.444814	11791	0.69968	23610	1.40102
IBDMDB_nonIBD_MSM9VZHN	56531	26177	0.463056	40044	0.708355	82700	1.46291
IBDMDB_nonIBD_MSM9VZHP	41691	18411	0.441606	28980	0.695114	57796	1.38629
IBDMDB_nonIBD_MSM9VZHR	37730	16011	0.424357	25841	0.684893	52195	1.38338
IBDMDB_nonIBD_MSM9VZHT	33959	13557	0.399217	23359	0.687859	44585	1.31291
IBDMDB_nonIBD_MSM9VZHX	40571	16390	0.403983	27271	0.67218	56841	1.40103
IBDMDB_nonIBD_MSM9VZHZ	24010	9498	0.395585	15917	0.662932	31510	1.31237
IBDMDB_nonIBD_MSM9VZI2	33895	14034	0.414043	22590	0.66647	48982	1.44511
IBDMDB_nonIBD_MSM9VZI6	29114	11863	0.407467	19865	0.682318	38666	1.32809
IBDMDB_nonIBD_MSM9VZJZ	60281	26287	0.436074	41409	0.686933	87112	1.4451
IBDMDB_nonIBD_MSM9VZKC	33539	14813	0.441665	22951	0.684308	48096	1.43403
IBDMDB_nonIBD_MSM9VZKE	52020	22286	0.428412	35875	0.689639	73329	1.40963
IBDMDB_nonIBD_MSM9VZKI	48832	20973	0.429493	33931	0.694852	69460	1.42243
IBDMDB_nonIBD_MSM9VZL5	52471	22977	0.437899	35586	0.678203	74652	1.42273
IBDMDB_nonIBD_MSM9VZL7	46061	19096	0.414581	31940	0.693428	63263	1.37346
IBDMDB_nonIBD_MSM9VZL9	70139	30533	0.435321	48937	0.697715	97651	1.39225
IBDMDB_nonIBD_MSM9VZLB	85211	37870	0.444426	59567	0.699053	121785	1.42922
IBDMDB_nonIBD_MSM9VZLD	43226	18050	0.417573	29626	0.685375	58442	1.35201
IBDMDB_nonIBD_MSM9VZLF	39953	16244	0.406578	27409	0.686031	51797	1.29645
IBDMDB_nonIBD_MSM9VZLH	43207	18076	0.418358	29673	0.686764	57990	1.34214
IBDMDB_nonIBD_MSM9VZLJ	60423	25154	0.416298	41177	0.681479	77534	1.28319
IBDMDB_nonIBD_MSM9VZMA	47861	21141	0.441717	32499	0.679029	71368	1.49115
IBDMDB_nonIBD_MSM9VZMA_TR	40194	16921	0.420983	27203	0.676793	58271	1.44974
IBDMDB_nonIBD_MSM9VZMC	36225	14990	0.413803	24748	0.683175	52018	1.43597
IBDMDB_nonIBD_MSM9VZME	36897	15138	0.410277	24722	0.670027	52503	1.42296
IBDMDB_nonIBD_MSM9VZMI	37282	15936	0.427445	24954	0.669331	56253	1.50885
IBDMDB_nonIBD_MSM9VZMM	58913	25660	0.435558	40020	0.679307	87900	1.49203
IBDMDB_nonIBD_MSM9VZMO	54856	23007	0.419407	36886	0.672415	78006	1.42201
IBDMDB_nonIBD_MSM9VZMS	55368	22257	0.401983	37248	0.672735	75660	1.36649
IBDMDB_nonIBD_MSM9VZMU	78420	33906	0.432364	53609	0.683614	111611	1.42325
IBDMDB_nonIBD_MSM9VZMW	60474	26902	0.444852	41520	0.686576	87828	1.45233
IBDMDB_nonIBD_MSM9VZNH	42161	18714	0.44387	28746	0.681815	56199	1.33296
IBDMDB_nonIBD_MSM9VZNH_TR	33681	14638	0.434607	22807	0.677147	44685	1.32671
IBDMDB_nonIBD_MSM9VZNL	42987	18309	0.425919	28759	0.669016	57145	1.32936
IBDMDB_nonIBD_MSM9VZOG	42116	18947	0.449877	29229	0.694012	59405	1.41051
IBDMDB_nonIBD_MSM9VZOI	18455	8543	0.46291	12752	0.690978	27699	1.50089
IBDMDB_nonIBD_MSM9VZOK	34844	14673	0.421105	24254	0.696074	46345	1.33007
IBDMDB_nonIBD_MSM9VZOM	21916	9467	0.431968	14947	0.682013	31838	1.45273
IBDMDB_nonIBD_MSM9VZOO	24730	11195	0.452689	16855	0.681561	37356	1.51055
IBDMDB_nonIBD_MSM9VZOQ	31188	14106	0.452289	21477	0.68863	45367	1.45463
IBDMDB_nonIBD_MSM9VZPT	59840	23831	0.398245	40349	0.674281	79282	1.3249
IBDMDB_nonIBD_MSMA26BB	72497	31019	0.427866	49959	0.689118	101355	1.39806
IBDMDB_nonIBD_MSMA26BD	51190	21825	0.426353	35897	0.70125	70464	1.37652
IBDMDB_nonIBD_MSMA26BF	49101	19670	0.400603	33765	0.687664	66186	1.34796
IBDMDB_nonIBD_MSMA26BH	45584	18453	0.404813	30804	0.675763	62962	1.38123
IBDMDB_nonIBD_MSMA26BJ	48684	21473	0.441069	34408	0.706762	68162	1.40009
IBDMDB_nonIBD_MSMA26BL	45816	18843	0.411276	31199	0.680963	63575	1.38762
IBDMDB_nonIBD_MSMA26BN	44591	19415	0.435402	30796	0.690633	62239	1.39577
IBDMDB_nonIBD_MSMA26BR	31924	13335	0.417711	21709	0.680021	43298	1.35628
IBDMDB_nonIBD_MSMA26BT	51020	22646	0.443865	36008	0.705762	75560	1.48099
IBDMDB_nonIBD_MSMA26BV	35587	15307	0.430129	24470	0.687611	48408	1.36027
IBDMDB_nonIBD_MSMA26BX	40518	17216	0.424898	27824	0.686707	55839	1.37813
IBDMDB_nonIBD_MSMA26DG	34828	15505	0.445188	23951	0.687694	49633	1.42509
IBDMDB_nonIBD_MSMA26DI	50364	22754	0.451791	34682	0.688627	71309	1.41587
IBDMDB_nonIBD_MSMA26DK	48494	21649	0.446426	33360	0.68792	70317	1.45001
IBDMDB_nonIBD_MSMA26DM	48975	21445	0.437876	33439	0.682777	69079	1.4105
IBDMDB_nonIBD_MSMA26DO	39430	17629	0.447096	27583	0.699543	55984	1.41983
IBDMDB_nonIBD_MSMAPC5H	34103	13246	0.388412	22731	0.66654	46031	1.34976
IBDMDB_nonIBD_MSMAPC5L	38751	16251	0.41937	26319	0.679182	53303	1.37553
IBDMDB_nonIBD_MSMAPC6K	75081	31591	0.420759	51886	0.691067	102754	1.36858
IBDMDB_nonIBD_MSMAPC6M	48307	20337	0.420995	33404	0.691494	65233	1.35038
IBDMDB_nonIBD_MSMAPC6O	49415	19462	0.393848	33953	0.687099	65455	1.3246
IBDMDB_nonIBD_MSMAPC7J	55575	25818	0.464561	38886	0.699703	77982	1.40318
IBDMDB_nonIBD_MSMAPC7P	28386	11770	0.414641	18982	0.66871	39381	1.38734
IBDMDB_nonIBD_MSMAPC7R	30540	13095	0.428782	20487	0.670825	42876	1.40393
IBDMDB_nonIBD_MSMAPC7T	37638	15628	0.415219	25245	0.670732	53121	1.41137
IBDMDB_nonIBD_MSMB4LXS	26255	11738	0.447077	18161	0.691716	37691	1.43557
IBDMDB_nonIBD_MSMB4LXW	30417	13190	0.433639	21014	0.690864	42406	1.39415
IBDMDB_nonIBD_MSMB4LZ8	47663	20448	0.429012	32955	0.691417	65649	1.37736
IBDMDB_nonIBD_MSMB4LZC	26821	10898	0.406323	18032	0.672309	36178	1.34887
IBDMDB_nonIBD_MSMB4LZK	42514	18213	0.4284	28838	0.678318	62667	1.47403
IBDMDB_nonIBD_MSMB4LZV	30093	12222	0.406141	20484	0.68069	38423	1.27681
IBDMDB_nonIBD_MSMB4LZX	38297	16068	0.419563	26709	0.697418	51107	1.33449
IBDMDB_nonIBD_MSMB4LZZ	46460	19359	0.416681	31596	0.680069	64438	1.38696
IBDMDB_nonIBD_PSM6XBTR	49526	19030	0.384243	31876	0.643622	65388	1.32028
IBDMDB_nonIBD_PSM6XBTT	53264	21223	0.398449	34722	0.651885	70320	1.32022
IBDMDB_nonIBD_PSM6XBTX	26300	10384	0.394829	16012	0.608821	34931	1.32817
IBDMDB_nonIBD_PSM6XBU2	36940	14354	0.388576	23396	0.633351	49533	1.3409
IBDMDB_nonIBD_PSM6XBW3	21439	11277	0.526004	15923	0.742712	30660	1.4301
IBDMDB_nonIBD_PSM7J14X	45686	18004	0.394081	31020	0.678983	60322	1.32036
IBDMDB_nonIBD_PSM7J154	46973	18922	0.402827	30737	0.654355	62640	1.33353
IBDMDB_nonIBD_PSM7J156	47503	18381	0.386944	30950	0.651538	60287	1.26912
IBDMDB_nonIBD_PSM7J15K	32045	14033	0.437915	22626	0.70607	43722	1.36439
IBDMDB_nonIBD_PSM7J15M	22354	9827	0.439608	15198	0.679878	31163	1.39407
IBDMDB_nonIBD_PSM7J15O	19426	9339	0.480747	14040	0.722743	27005	1.39015
IBDMDB_nonIBD_PSM7J15Q	39592	18016	0.455041	28348	0.716003	54318	1.37194
IBDMDB_nonIBD_PSM7J15S	40190	19001	0.472779	29494	0.733864	54887	1.36569
IBDMDB_nonIBD_PSM7J15U	11647	5338	0.458315	8118	0.697004	16023	1.37572
IBDMDB_nonIBD_PSM7J16U	12092	4882	0.403738	7743	0.640341	16631	1.37537
IBDMDB_nonIBD_PSM7J16W	27655	11424	0.41309	18123	0.655325	36495	1.31965
IBDMDB_nonIBD_PSM7J16Y	48460	19370	0.399711	31577	0.65161	64635	1.33378
IBDMDB_nonIBD_PSM7J171	16508	6312	0.38236	10325	0.625454	20904	1.2663
IBDMDB_nonIBD_PSM7J173	45679	18024	0.39458	30212	0.661398	59772	1.30852
IBDMDB_nonIBD_PSM7J17V	41591	20544	0.493953	30004	0.721406	59502	1.43065
IBDMDB_nonIBD_PSM7J17X	11202	5193	0.463578	7918	0.706838	14855	1.3261
IBDMDB_nonIBD_PSM7J17Z	32630	15821	0.484861	23519	0.720778	46687	1.4308
IBDMDB_nonIBD_PSM7J182	28152	13620	0.483802	20465	0.726947	39084	1.38832
IBDMDB_nonIBD_PSM7J184	13918	6642	0.477224	9749	0.70046	19605	1.40861
IBDMDB_nonIBD_PSM7J186	14755	6868	0.465469	10216	0.692375	20510	1.39004
IBDMDB_nonIBD_PSM7J19N	38660	15030	0.388774	25325	0.65507	49884	1.29033
IBDMDB_nonIBD_PSM7J19P	49394	20992	0.424991	33235	0.672855	66982	1.35608
IBDMDB_nonIBD_PSM7J19R	49480	19881	0.401799	32632	0.659499	64574	1.30505
IBDMDB_nonIBD_PSM7J19T	38759	15552	0.401249	26049	0.672076	51526	1.32939
IBDMDB_nonIBD_PSM7J19Z	22609	10013	0.442877	16253	0.718873	30300	1.34017
IBDMDB_nonIBD_PSM7J1A2	42461	20102	0.473423	30798	0.725324	59091	1.39165
IBDMDB_nonIBD_PSM7J1A4	37508	18901	0.503919	27908	0.744055	53519	1.42687
IBDMDB_nonIBD_PSM7J1A6	24250	13761	0.567464	18263	0.753113	35693	1.47188
IBDMDB_nonIBD_PSM7J1A8	35066	17176	0.489819	24786	0.706839	49918	1.42354
IBDMDB_nonIBD_PSM7J1DF	35101	13119	0.37375	21793	0.620866	45129	1.28569
IBDMDB_nonIBD_PSM7J1DL	50404	19523	0.38733	32968	0.654075	67152	1.33228
IBDMDB_nonIBD_PSMA265D	15580	7586	0.486906	11083	0.711361	22279	1.42997
IBDMDB_nonIBD_PSMA265F	21324	8900	0.41737	14741	0.691287	28410	1.3323
IBDMDB_nonIBD_PSMA265H	21280	9448	0.443985	15006	0.705169	29062	1.3657
IBDMDB_nonIBD_PSMA265J	30866	14713	0.476673	21714	0.703493	45228	1.4653
IBDMDB_nonIBD_PSMA265J_TR	30866	14713	0.476673	21713	0.70346	45228	1.4653
IBDMDB_nonIBD_PSMA265L	56659	26302	0.464216	40705	0.718421	79591	1.40474
IBDMDB_UC_CSM5FZ4M	34188	15047	0.440125	23225	0.679332	51135	1.4957
IBDMDB_UC_CSM5MCUO	59690	26509	0.444111	40721	0.682208	85647	1.43486
IBDMDB_UC_CSM5MCWQ	39841	17265	0.433348	27536	0.691147	56220	1.41111
IBDMDB_UC_CSM5MCX3	59165	25695	0.434294	40996	0.69291	82049	1.38678
IBDMDB_UC_CSM5MCXH	33949	14218	0.418805	22684	0.668179	49150	1.44776
IBDMDB_UC_CSM5MCXJ	33451	14418	0.431019	22065	0.659622	48814	1.45927
IBDMDB_UC_CSM5MCXL	45647	19658	0.430653	30996	0.679037	65871	1.44305
IBDMDB_UC_CSM5MCXN	44706	20045	0.448374	30574	0.68389	63020	1.40965
IBDMDB_UC_CSM5MCXP	44058	19906	0.451814	30389	0.68975	65383	1.48402
IBDMDB_UC_CSM5MCXR	30506	14069	0.461188	20806	0.68203	46533	1.52537
IBDMDB_UC_CSM5MCY4	39592	17508	0.442211	26709	0.674606	59934	1.51379
IBDMDB_UC_CSM5MCY8	49676	22208	0.447057	33307	0.670485	73461	1.4788
IBDMDB_UC_CSM67U9H	9767	4053	0.414969	6128	0.627419	12943	1.32518
IBDMDB_UC_CSM67U9N	1973	457	0.231627	1073	0.543842	1791	0.907755
IBDMDB_UC_CSM67UAK	29995	13017	0.433972	20070	0.669112	44870	1.49592
IBDMDB_UC_CSM67UAM	33286	15158	0.455387	22670	0.681067	52108	1.56546
IBDMDB_UC_CSM67UAO	29045	12751	0.439008	19237	0.662317	44996	1.54918
IBDMDB_UC_CSM67UAQ	31141	14255	0.457757	21098	0.677499	49210	1.58023
IBDMDB_UC_CSM67UAS	41829	18390	0.439647	28633	0.684525	63125	1.50912
IBDMDB_UC_CSM67UBX	37372	16112	0.431125	25486	0.681954	53707	1.43709
IBDMDB_UC_CSM67UBZ	46898	20591	0.439059	32167	0.685893	69467	1.48124
IBDMDB_UC_CSM67UC6	52790	22852	0.432885	36661	0.694469	75909	1.43794
IBDMDB_UC_CSM67UDF	35201	15124	0.429647	24128	0.685435	51706	1.46888
IBDMDB_UC_CSM67UDJ	32940	14441	0.438403	22164	0.67286	48926	1.48531
IBDMDB_UC_CSM67UDN	32646	14008	0.429088	22152	0.678552	48001	1.47035
IBDMDB_UC_CSM67UDR	24367	10876	0.446341	16949	0.695572	35212	1.44507
IBDMDB_UC_CSM67UDR_TR	34848	16144	0.463269	24357	0.69895	51107	1.46657
IBDMDB_UC_CSM67UDY	22654	9172	0.404873	15032	0.663547	31821	1.40465
IBDMDB_UC_CSM67UE3	46196	19561	0.423435	31141	0.674106	68755	1.48833
IBDMDB_UC_CSM67UE7	45636	19607	0.429639	31127	0.682071	64982	1.42392
IBDMDB_UC_CSM67UEA	43005	16701	0.38835	27647	0.642879	56438	1.31236
IBDMDB_UC_CSM67UEI	59693	28383	0.475483	41425	0.693967	90422	1.51478
IBDMDB_UC_CSM67UEM	39306	16894	0.429807	26539	0.67519	58934	1.49936
IBDMDB_UC_CSM67UEW	24136	9840	0.40769	16826	0.697133	31000	1.28439
IBDMDB_UC_CSM67UEW_TR	26560	10766	0.405346	18630	0.701431	33422	1.25836
IBDMDB_UC_CSM67UF1	34463	15301	0.443983	23936	0.694542	48202	1.39866
IBDMDB_UC_CSM67UF5	25148	11426	0.45435	17765	0.706418	33935	1.34941
IBDMDB_UC_CSM67UFV	62714	26590	0.423988	42632	0.679784	87713	1.39862
IBDMDB_UC_CSM67UFZ	50825	21761	0.428155	34635	0.681456	72594	1.42831
IBDMDB_UC_CSM67UG8	59411	25443	0.428254	40842	0.687448	83589	1.40696
IBDMDB_UC_CSM79HGF	18011	6724	0.373327	12342	0.685248	22925	1.27283
IBDMDB_UC_CSM79HID	37004	16962	0.458383	25280	0.683169	58421	1.57878
IBDMDB_UC_CSM79HIF	31121	13874	0.445808	20809	0.668648	49548	1.59211
IBDMDB_UC_CSM79HIH	34033	15053	0.442306	22823	0.670614	53957	1.58543
IBDMDB_UC_CSM79HIJ	35921	16253	0.452465	24220	0.674257	55829	1.55422
IBDMDB_UC_CSM79HIL	30891	12913	0.418018	20648	0.668415	45793	1.48241
IBDMDB_UC_CSM79HIN	42411	18541	0.437174	28731	0.677442	63118	1.48825
IBDMDB_UC_CSM79HLA	65128	28824	0.442575	45302	0.695584	92986	1.42774
IBDMDB_UC_CSM79HLA_TR	46426	20053	0.431935	31643	0.681579	66220	1.42636
IBDMDB_UC_CSM79HLC	40054	17478	0.436361	27379	0.683552	58542	1.46158
IBDMDB_UC_CSM79HLE	27068	11378	0.420349	18312	0.676518	39384	1.455
IBDMDB_UC_CSM79HLG	43302	18911	0.436723	29586	0.683248	62727	1.44859
IBDMDB_UC_CSM79HLI	31995	13668	0.427192	21472	0.671105	46075	1.44007
IBDMDB_UC_CSM79HLK	19441	8323	0.428116	13206	0.679286	29025	1.49298
IBDMDB_UC_CSM79HLM	34369	14827	0.431406	23216	0.675492	50106	1.45788
IBDMDB_UC_CSM79HM1	42318	18657	0.440876	28716	0.678576	61414	1.45125
IBDMDB_UC_CSM79HM7	49811	22385	0.449399	34136	0.68531	70402	1.41338
IBDMDB_UC_CSM79HMN	29991	12204	0.406922	19832	0.661265	40650	1.35541
IBDMDB_UC_CSM79HMP	42157	17661	0.418934	28303	0.671371	56948	1.35086
IBDMDB_UC_CSM79HMT	52222	21764	0.416759	35667	0.682988	72697	1.39208
IBDMDB_UC_CSM79HNE	26035	11966	0.459612	17961	0.689879	38063	1.46199
IBDMDB_UC_CSM79HNI	51685	24699	0.477876	35857	0.69376	76021	1.47085
IBDMDB_UC_CSM79HNK	33552	15324	0.456724	22974	0.684728	48231	1.4375
IBDMDB_UC_CSM79HNM	61472	28442	0.462682	42985	0.699261	87319	1.42047
IBDMDB_UC_CSM79HO1	46494	22348	0.480664	31886	0.685809	72745	1.56461
IBDMDB_UC_CSM79HPK	16929	7438	0.439364	11674	0.689586	22781	1.34568
IBDMDB_UC_CSM79HPO	471	123	0.261146	272	0.577495	493	1.04671
IBDMDB_UC_CSM79HPS	28155	11454	0.406819	19076	0.677535	37221	1.322
IBDMDB_UC_CSM79HPU	11	0	0	1	0.0909091	1	0.0909091
IBDMDB_UC_CSM7KOJQ	38017	16747	0.440513	25694	0.675856	57428	1.51059
IBDMDB_UC_CSM7KOJS	35495	16234	0.45736	23979	0.67556	54902	1.54675
IBDMDB_UC_CSM7KOJU	29527	13102	0.443729	19892	0.673688	45042	1.52545
IBDMDB_UC_CSM7KOJW	32918	14707	0.446777	22265	0.676378	51206	1.55556
IBDMDB_UC_CSM7KOJY	29718	13368	0.449828	19969	0.67195	46593	1.56784
IBDMDB_UC_CSM7KOK1	37039	16608	0.448392	25046	0.676206	56891	1.53598
IBDMDB_UC_CSM7KOLY	49391	23274	0.471219	34390	0.696281	71567	1.44899
IBDMDB_UC_CSM7KOMP	60826	26679	0.438612	41594	0.683819	84660	1.39184
IBDMDB_UC_CSM7KOMT	51342	22631	0.440789	35090	0.683456	71710	1.39671
IBDMDB_UC_CSM7KONU	1947	594	0.305085	1105	0.56754	1889	0.970211
IBDMDB_UC_CSM7KOP6	49931	20360	0.407763	32800	0.656907	70151	1.40496
IBDMDB_UC_CSM7KOP8	65854	28289	0.429571	44136	0.67021	95034	1.4431
IBDMDB_UC_CSM7KOPE	51608	21841	0.42321	34234	0.663347	75082	1.45485
IBDMDB_UC_CSM7KOPG	31927	14294	0.447709	21574	0.675729	49622	1.55423
IBDMDB_UC_CSM7KOPI	41885	18566	0.443261	28606	0.682965	61802	1.47552
IBDMDB_UC_CSM7KOPK	37365	15660	0.419109	25260	0.676034	54366	1.455
IBDMDB_UC_CSM7KOPM	40862	18265	0.446992	28086	0.687338	60484	1.4802
IBDMDB_UC_CSM7KOPO	42022	18238	0.434011	28563	0.679715	61585	1.46554
IBDMDB_UC_CSM7KORM	39520	16402	0.41503	26642	0.67414	56204	1.42217
IBDMDB_UC_CSM7KORO	20604	7611	0.369394	13611	0.6606	26504	1.28635
IBDMDB_UC_CSM7KORS	42761	18129	0.423961	28785	0.67316	63176	1.47742
IBDMDB_UC_CSM7KORU	38176	16017	0.419557	25710	0.67346	56197	1.47205
IBDMDB_UC_CSM7KOS7	58110	25149	0.432783	40281	0.693185	78805	1.35613
IBDMDB_UC_CSM7KOSH	36270	16767	0.462283	25080	0.691481	52533	1.44839
IBDMDB_UC_CSM7KOU9	69707	28852	0.413904	46511	0.667236	97084	1.39274
IBDMDB_UC_CSM7KOUB	50820	20881	0.410882	33349	0.656218	71389	1.40474
IBDMDB_UC_CSM7KOUL	32268	13066	0.404921	21893	0.678474	45949	1.42398
IBDMDB_UC_CSM7KOUN	41152	18632	0.45276	28467	0.691753	63407	1.5408
IBDMDB_UC_CSM9X1XU	34917	14155	0.40539	23233	0.665378	50616	1.44961
IBDMDB_UC_CSM9X1Y3	42677	18245	0.427514	29065	0.681046	60922	1.42751
IBDMDB_UC_CSM9X1Y5	58651	27023	0.460742	41259	0.703466	82397	1.40487
IBDMDB_UC_CSM9X1ZO	58869	25544	0.433913	38939	0.661452	86214	1.46451
IBDMDB_UC_CSM9X1ZQ	58138	25264	0.434552	38353	0.659689	86272	1.48392
IBDMDB_UC_CSM9X1ZY	41796	16425	0.39298	27050	0.647191	57941	1.38628
IBDMDB_UC_CSM9X211	57027	25461	0.446473	40386	0.708191	83521	1.46459
IBDMDB_UC_CSM9X213	44805	19967	0.445642	30895	0.689544	67520	1.50697
IBDMDB_UC_CSM9X215	46453	20601	0.443481	32241	0.694056	70592	1.51964
IBDMDB_UC_CSM9X219	38800	17047	0.439356	27144	0.699588	56647	1.45997
IBDMDB_UC_CSM9X21J	43920	19859	0.452163	29986	0.682741	65625	1.49419
IBDMDB_UC_CSM9X21L	33842	14555	0.430087	22837	0.674812	48785	1.44155
IBDMDB_UC_CSM9X21N	45723	18922	0.41384	30641	0.670144	65725	1.43746
IBDMDB_UC_CSM9X22G	61655	25475	0.413186	40567	0.657968	86252	1.39895
IBDMDB_UC_CSM9X22I	72624	30277	0.416901	48042	0.661517	101237	1.39399
IBDMDB_UC_CSM9X22K	53534	22983	0.429316	35734	0.667501	76742	1.43352
IBDMDB_UC_CSM9X22S	45457	19635	0.431947	31895	0.701652	66323	1.45903
IBDMDB_UC_CSM9X22U	41499	18822	0.453553	29419	0.708909	61040	1.47088
IBDMDB_UC_CSM9X23H	35727	15798	0.442187	24629	0.689367	55590	1.55597
IBDMDB_UC_CSM9X23N	35822	15752	0.43973	24920	0.695662	54667	1.52607
IBDMDB_UC_ESM5ME9U	41045	17097	0.416543	27857	0.678694	57716	1.40616
IBDMDB_UC_ESM5MEBS	37652	15913	0.422634	25633	0.680787	54602	1.45018
IBDMDB_UC_ESM5MEBU	37069	15506	0.418301	25313	0.682862	52384	1.41315
IBDMDB_UC_ESM5MEC3	45548	18404	0.404057	31231	0.685672	62465	1.37141
IBDMDB_UC_ESM5MEC5	29281	11199	0.382466	19427	0.663468	39760	1.35788
IBDMDB_UC_ESM5MEC9	31866	15324	0.480889	22041	0.691678	49945	1.56734
IBDMDB_UC_ESM5MEDU	38985	16214	0.415904	26527	0.680441	55719	1.42924
IBDMDB_UC_ESM718SY	45717	19624	0.42925	31338	0.685478	66610	1.45701
IBDMDB_UC_HSM5MD3Y	16846	6676	0.396296	11395	0.676422	22648	1.34441
IBDMDB_UC_HSM5MD41	42654	18797	0.440686	28656	0.671824	65082	1.52581
IBDMDB_UC_HSM5MD43	38390	17024	0.443449	25845	0.673222	57554	1.49919
IBDMDB_UC_HSM67VGY	54571	24142	0.442396	38336	0.702498	78676	1.44172
IBDMDB_UC_HSM67VH1	44562	20176	0.452762	31369	0.703941	64454	1.44639
IBDMDB_UC_HSM6XRR5	18824	6599	0.350563	12328	0.654909	22533	1.19704
IBDMDB_UC_HSM6XRR7	33568	14279	0.425375	23304	0.694233	45550	1.35695
IBDMDB_UC_HSM6XRRB	20633	9519	0.461348	14464	0.701013	30566	1.48141
IBDMDB_UC_HSM6XRRD	26139	11313	0.432802	17749	0.679024	36271	1.38762
IBDMDB_UC_HSM6XRTM	38061	16080	0.42248	26331	0.691811	54173	1.42332
IBDMDB_UC_HSM6XRTO	45788	19825	0.432974	31578	0.689657	65971	1.44079
IBDMDB_UC_HSM6XRTQ	12832	5113	0.398457	8967	0.6988	16434	1.2807
IBDMDB_UC_HSM6XRTS	44354	18860	0.425215	30485	0.687311	63648	1.435
IBDMDB_UC_HSM6XRUX	40294	17090	0.424133	27495	0.68236	56408	1.39991
IBDMDB_UC_HSM6XRUZ	19989	8170	0.408725	13446	0.67267	26583	1.32988
IBDMDB_UC_HSM6XRV2	22291	8689	0.389799	14974	0.671751	28313	1.27015
IBDMDB_UC_HSM6XRV4	50042	22399	0.447604	33987	0.679169	70832	1.41545
IBDMDB_UC_HSM6XRV6	52121	23391	0.448783	35861	0.688034	73307	1.40648
IBDMDB_UC_HSM6XRV8	49943	22741	0.455339	34906	0.698917	69115	1.38388
IBDMDB_UC_HSM7CZ1V	44580	19040	0.427097	29724	0.666756	65819	1.47642
IBDMDB_UC_HSM7CZ1Z	42603	17480	0.4103	28106	0.659719	61522	1.44408
IBDMDB_UC_HSM7CZ22	32772	13197	0.402691	21669	0.661205	46346	1.4142
IBDMDB_UC_HSM7J4GP	49639	21226	0.427607	33395	0.672757	72104	1.45257
IBDMDB_UC_HSM7J4GR	36268	14489	0.399498	23988	0.66141	51067	1.40805
IBDMDB_UC_HSM7J4HM	31789	14401	0.453018	22229	0.699267	46753	1.47073
IBDMDB_UC_HSM7J4HO	29225	12660	0.433191	20092	0.687494	41983	1.43654
IBDMDB_UC_HSM7J4HQ	19939	8192	0.410853	13699	0.687045	27068	1.35754
IBDMDB_UC_HSM7J4HS	10777	5193	0.48186	7618	0.706876	15895	1.4749
IBDMDB_UC_HSM7J4HU	9786	3799	0.388208	6239	0.637543	13251	1.35408
IBDMDB_UC_HSM7J4JZ	5501	2119	0.385203	3974	0.722414	6789	1.23414
IBDMDB_UC_HSM7J4K2	27832	12230	0.439422	19047	0.684356	40458	1.45365
IBDMDB_UC_HSM7J4K4	114	19	0.166667	33	0.289474	56	0.491228
IBDMDB_UC_HSM7J4K6	15927	6938	0.435612	10714	0.672694	22932	1.43982
IBDMDB_UC_HSM7J4K8	13878	6319	0.455325	9521	0.68605	19785	1.42564
IBDMDB_UC_HSM7J4KA	40	3	0.075	3	0.075	10	0.25
IBDMDB_UC_HSM7J4M4	27128	11496	0.423769	18814	0.693527	35674	1.31503
IBDMDB_UC_HSM7J4M6	34474	14595	0.423363	23632	0.685502	47089	1.36593
IBDMDB_UC_HSM7J4M8	56006	24760	0.442095	38814	0.693033	76542	1.36667
IBDMDB_UC_HSM7J4MA	51976	23487	0.451882	35658	0.686047	73165	1.40767
IBDMDB_UC_HSM7J4MC	54273	24059	0.443296	37304	0.68734	75773	1.39615
IBDMDB_UC_HSM7J4ME	53794	24538	0.456148	37540	0.697847	75025	1.39467
IBDMDB_UC_HSM7J4NC	44616	18684	0.418774	30173	0.676282	64449	1.44453
IBDMDB_UC_HSM7J4NE	28752	10931	0.380182	19104	0.664441	38659	1.34457
IBDMDB_UC_HSM7J4NM	62590	27270	0.435693	43194	0.69011	88558	1.41489
IBDMDB_UC_HSM7J4NO	26279	11071	0.421287	17834	0.678641	36711	1.39697
IBDMDB_UC_HSM7J4NS	58120	25861	0.444959	40405	0.6952	81562	1.40334
IBDMDB_UC_HSM7J4NU	67467	28680	0.425097	45910	0.680481	95368	1.41355
IBDMDB_UC_HSM7J4PC	16128	6050	0.375124	11017	0.683098	19601	1.21534
IBDMDB_UC_HSM7J4PE	29316	12769	0.435564	19806	0.675604	40913	1.39559
IBDMDB_UC_HSM7J4PG	45069	18810	0.41736	30393	0.674366	63614	1.41148
IBDMDB_UC_HSM7J4PI	28209	11438	0.405473	19156	0.679074	36810	1.3049
IBDMDB_UC_HSM7J4PK	66	6	0.0909091	0	0	2	0.030303
IBDMDB_UC_HSM7J4PM	37303	15299	0.410128	25541	0.68469	49366	1.32338
IBDMDB_UC_HSMA33IA	41930	17817	0.424922	28222	0.673074	61520	1.46721
IBDMDB_UC_HSMA33IC	43989	18363	0.417445	29737	0.67601	62221	1.41447
IBDMDB_UC_HSMA33IO	63	6	0.0952381	0	0	1	0.015873
IBDMDB_UC_HSMA33IS	8959	3516	0.392455	6014	0.67128	11081	1.23686
IBDMDB_UC_HSMA33LB	6858	2944	0.42928	4817	0.702391	9724	1.41791
IBDMDB_UC_HSMA33LH	17380	6934	0.398964	11402	0.656041	23587	1.35713
IBDMDB_UC_HSMA33LH_TR	31283	13361	0.427101	21252	0.679347	43697	1.39683
IBDMDB_UC_HSMA33LJ	38293	15115	0.39472	25218	0.658554	51376	1.34166
IBDMDB_UC_HSMA33LX	66463	29107	0.437943	46216	0.695364	92766	1.39575
IBDMDB_UC_HSMA33LZ	41575	18812	0.452483	28456	0.68445	63869	1.53624
IBDMDB_UC_HSMA33M2	48503	19397	0.399913	31856	0.656784	66780	1.37682
IBDMDB_UC_HSMA33M8	27272	11667	0.427801	18373	0.673695	39864	1.46172
IBDMDB_UC_HSMA33MA	24110	10289	0.426752	16166	0.67051	33117	1.37358
IBDMDB_UC_HSMA33MC	16679	6918	0.414773	10934	0.655555	22659	1.35853
IBDMDB_UC_HSMA33ME	6786	2525	0.37209	4513	0.665046	8470	1.24816
IBDMDB_UC_HSMA33MG	6325	2412	0.381344	4553	0.719842	8069	1.27573
IBDMDB_UC_HSMA33MI	703	186	0.26458	452	0.642959	741	1.05405
IBDMDB_UC_HSMA33MK	3201	1227	0.383318	2284	0.713527	4154	1.29772
IBDMDB_UC_HSMA33MX	75	4	0.0533333	3	0.04	6	0.08
IBDMDB_UC_HSMA33MZ	8553	3785	0.442535	5830	0.681632	11609	1.3573
IBDMDB_UC_HSMA33N4	189	17	0.0899471	36	0.190476	69	0.365079
IBDMDB_UC_HSMA33NW	33335	13854	0.415599	22505	0.675116	46695	1.40078
IBDMDB_UC_HSMA33O1	9122	3366	0.368998	5715	0.626507	11975	1.31276
IBDMDB_UC_HSMA33O3	5036	2163	0.429508	3233	0.641978	7421	1.47359
IBDMDB_UC_HSMA33OD	45723	19198	0.419876	30649	0.670319	65873	1.4407
IBDMDB_UC_HSMA33OJ	46801	21106	0.450973	32239	0.688853	68006	1.45309
IBDMDB_UC_HSMA33OL	33474	14483	0.432664	22583	0.674643	49666	1.48372
IBDMDB_UC_HSMA33OP	2314	829	0.358254	1565	0.676318	2905	1.2554
IBDMDB_UC_HSMA33OR	9413	3966	0.421332	6448	0.68501	13067	1.38819
IBDMDB_UC_HSMA33OT	5463	2025	0.370675	3725	0.68186	7004	1.28208
IBDMDB_UC_HSMA33OV	40876	18602	0.455084	27887	0.682234	60898	1.48982
IBDMDB_UC_HSMA33OX	31996	14652	0.457932	21856	0.683085	47236	1.47631
IBDMDB_UC_HSMA33OZ	40677	18720	0.460211	28437	0.699093	59963	1.47413
IBDMDB_UC_HSMA33P6	44115	18314	0.415142	29546	0.66975	62790	1.42333
IBDMDB_UC_HSMA33RD	27223	11745	0.431437	18710	0.687286	36489	1.34037
IBDMDB_UC_HSMA33RF	24906	9922	0.398378	16122	0.647314	32284	1.29623
IBDMDB_UC_HSMA33RR	8748	3821	0.436786	6149	0.702904	12350	1.41175
IBDMDB_UC_HSMA33RT	36894	15385	0.417005	24430	0.662167	54341	1.4729
IBDMDB_UC_HSMA33RX	45386	18931	0.417111	29923	0.6593	66382	1.46261
IBDMDB_UC_HSMA33RX_TR	43266	18091	0.418134	28810	0.665881	63130	1.45911
IBDMDB_UC_MSM6J2HD	17641	8499	0.481775	12044	0.682728	29076	1.64821
IBDMDB_UC_MSM6J2HF	16585	7581	0.4571	11506	0.693759	26050	1.5707
IBDMDB_UC_MSM6J2HH	6732	2847	0.422906	4600	0.683304	9537	1.41667
IBDMDB_UC_MSM6J2HJ	19170	8850	0.461659	13187	0.687898	30276	1.57934
IBDMDB_UC_MSM6J2HL	21874	10615	0.485279	15106	0.690592	35176	1.60812
IBDMDB_UC_MSM6J2OH	14225	6446	0.453146	9780	0.687522	22131	1.55578
IBDMDB_UC_MSM6J2OJ	31817	13739	0.431813	21529	0.676651	46820	1.47154
IBDMDB_UC_MSM6J2OL	24370	11095	0.455273	17261	0.708289	36845	1.5119
IBDMDB_UC_MSM6J2ON	21284	10080	0.473595	14722	0.691693	33705	1.58358
IBDMDB_UC_MSM6J2OP	25971	12427	0.478495	18247	0.702591	40532	1.56066
IBDMDB_UC_MSM79H7C	54419	24066	0.442235	36858	0.6773	79869	1.46767
IBDMDB_UC_MSM79H7E	47330	20199	0.426769	31693	0.669618	67166	1.4191
IBDMDB_UC_MSM79H7G	50405	22601	0.448388	34522	0.684892	75210	1.49211
IBDMDB_UC_MSM79H7M	42422	19060	0.449295	28673	0.675899	65141	1.53555
IBDMDB_UC_MSM79HAJ	53447	23239	0.434805	36490	0.682732	70143	1.31238
IBDMDB_UC_MSM79HAL	54529	22619	0.414807	36881	0.676356	72847	1.33593
IBDMDB_UC_MSM79HAN	58302	25140	0.431203	40766	0.699221	76394	1.31032
IBDMDB_UC_MSM79HAR	72983	29820	0.408588	49871	0.683324	97421	1.33485
IBDMDB_UC_MSM79HAT	39446	14802	0.375247	26701	0.6769	49212	1.24758
IBDMDB_UC_MSM79HBZ	13790	8060	0.584482	10740	0.778825	21815	1.58194
IBDMDB_UC_MSM79HDA	25820	13166	0.509915	19835	0.768203	37646	1.45802
IBDMDB_UC_MSM79HDC	33979	15798	0.464934	24513	0.721416	47400	1.39498
IBDMDB_UC_MSM79HDE	36419	17548	0.481836	26749	0.734479	52347	1.43735
IBDMDB_UC_MSM79HDG	22966	11088	0.482801	16736	0.728729	33099	1.44122
IBDMDB_UC_MSM79HDG_TR	24584	12216	0.496909	17706	0.720225	36458	1.483
IBDMDB_UC_MSM79HDI	32064	15932	0.496881	23264	0.725549	46716	1.45696
IBDMDB_UC_MSM79HEA	25015	12110	0.48411	17429	0.696742	38691	1.54671
IBDMDB_UC_MSM79HF3	28656	12269	0.428148	19517	0.681079	36544	1.27527
IBDMDB_UC_MSM79HF5	68391	29802	0.435759	46704	0.682897	93755	1.37087
IBDMDB_UC_MSM79HF7	57740	25969	0.449758	39247	0.679719	79025	1.36864
IBDMDB_UC_MSM79HF9	21671	8014	0.369803	13644	0.629597	25697	1.18578
IBDMDB_UC_MSM79HF9_TR	20538	7594	0.369754	12892	0.627714	24514	1.19359
IBDMDB_UC_MSM79HFB	67321	28786	0.427593	45127	0.670326	91221	1.35502
IBDMDB_UC_MSM9VZEU	39360	17888	0.454472	28084	0.713516	54302	1.37962
IBDMDB_UC_MSM9VZEW	37630	18239	0.484693	26871	0.714085	54572	1.45023
IBDMDB_UC_MSM9VZEY	52392	24466	0.46698	38027	0.725817	74191	1.41607
IBDMDB_UC_MSM9VZF1	26918	13448	0.499591	19676	0.730961	40086	1.48919
IBDMDB_UC_MSM9VZF3	37539	18285	0.487093	26847	0.715176	54642	1.45561
IBDMDB_UC_MSM9VZF5	29695	14100	0.474827	21676	0.729955	42585	1.43408
IBDMDB_UC_MSM9VZIM	31629	14007	0.442853	22058	0.697398	43299	1.36897
IBDMDB_UC_MSM9VZIO	20905	8514	0.407271	14525	0.69481	27477	1.31437
IBDMDB_UC_MSM9VZIQ	48327	21156	0.437768	34075	0.705092	66676	1.37968
IBDMDB_UC_MSM9VZIS	26928	11772	0.437166	18484	0.686423	37293	1.38492
IBDMDB_UC_MSM9VZIU	48997	22866	0.466682	34511	0.704349	71518	1.45964
IBDMDB_UC_MSM9VZIW	34866	15649	0.448833	24297	0.696868	50043	1.4353
IBDMDB_UC_MSM9VZLL	69752	31057	0.445249	48802	0.69965	97820	1.4024
IBDMDB_UC_MSM9VZLN	78128	34959	0.447458	54513	0.69774	109175	1.39739
IBDMDB_UC_MSM9VZLP	43881	18784	0.428067	29903	0.681457	57758	1.31624
IBDMDB_UC_MSM9VZLR	33319	14668	0.440229	22897	0.687205	43877	1.31688
IBDMDB_UC_MSM9VZLT	35886	14644	0.40807	23698	0.660369	43987	1.22574
IBDMDB_UC_MSM9VZLV	50722	23032	0.454083	34866	0.687394	67828	1.33725
IBDMDB_UC_MSM9VZLZ	54	7	0.12963	2	0.037037	6	0.111111
IBDMDB_UC_MSM9VZNR	26288	12202	0.464166	18727	0.712378	38860	1.47824
IBDMDB_UC_MSM9VZNX	47265	24303	0.514186	34478	0.729462	72259	1.52881
IBDMDB_UC_MSM9VZNZ	45320	21350	0.471094	32706	0.721668	66963	1.47756
IBDMDB_UC_MSM9VZO2	33152	15203	0.458585	23081	0.696217	48183	1.4534
IBDMDB_UC_MSM9VZOS	30181	14120	0.467844	21737	0.720221	43147	1.42961
IBDMDB_UC_MSM9VZOU	14874	6876	0.462283	10420	0.700551	21229	1.42726
IBDMDB_UC_MSM9VZOW	39932	18501	0.463313	28505	0.713839	56562	1.41646
IBDMDB_UC_MSM9VZOY	33458	15344	0.458605	23994	0.717138	46713	1.39617
IBDMDB_UC_MSM9VZP1	17697	8314	0.469797	12376	0.699328	25643	1.449
IBDMDB_UC_MSM9VZP3	20682	9290	0.449183	14431	0.697757	28743	1.38976
IBDMDB_UC_MSMA267V	51913	21071	0.405891	34930	0.672857	67651	1.30316
IBDMDB_UC_MSMA267X	46217	17128	0.3706	30146	0.652271	57216	1.23799
IBDMDB_UC_MSMA2684	35692	15313	0.429032	24464	0.68542	50007	1.40107
IBDMDB_UC_MSMA2688	31364	13563	0.432438	21311	0.679473	40463	1.29011
IBDMDB_UC_MSMA26AV	38380	16997	0.442861	26152	0.681397	54480	1.41949
IBDMDB_UC_MSMA26AX	29883	13401	0.448449	20536	0.687213	43039	1.44025
IBDMDB_UC_MSMA26AZ	43819	18630	0.425158	29496	0.673133	61687	1.40777
IBDMDB_UC_MSMA26AZ_TR	40694	17288	0.424829	27509	0.675996	56749	1.39453
IBDMDB_UC_MSMA26EH	129	31	0.24031	50	0.387597	92	0.713178
IBDMDB_UC_MSMA26EJ	27280	13515	0.495418	19669	0.721004	40328	1.4783
IBDMDB_UC_MSMA26EL	21023	9468	0.450364	14881	0.707844	28801	1.36998
IBDMDB_UC_MSMA26EN	22337	9710	0.434705	15711	0.703362	29507	1.32099
IBDMDB_UC_MSMA26EP	255	66	0.258824	111	0.435294	200	0.784314
IBDMDB_UC_MSMA26ER	16428	5993	0.364804	9958	0.60616	18690	1.13769
IBDMDB_UC_MSMA26ET	29588	14006	0.473368	20206	0.682912	40717	1.37613
IBDMDB_UC_MSMA26EZ	28576	12023	0.420738	19726	0.6903	37895	1.32611
IBDMDB_UC_MSMAPC55	49349	20463	0.414659	33238	0.673529	67918	1.37628
IBDMDB_UC_MSMAPC57	21587	9868	0.457127	14896	0.690045	30566	1.41594
IBDMDB_UC_MSMAPC59	39173	17932	0.457764	27586	0.70421	55655	1.42075
IBDMDB_UC_MSMAPC5B	21617	9371	0.433501	14675	0.678864	30877	1.42837
IBDMDB_UC_MSMAPC5D	44106	19822	0.449417	30664	0.695234	61672	1.39827
IBDMDB_UC_MSMAPC5Z	46766	19431	0.415494	31269	0.668627	64604	1.38143
IBDMDB_UC_MSMAPC64	36315	14121	0.388848	23338	0.642655	44616	1.22858
IBDMDB_UC_MSMAPC66	32737	12159	0.371415	21013	0.641873	40264	1.22992
IBDMDB_UC_MSMB4LYH	52965	21638	0.408534	36359	0.686472	69220	1.3069
IBDMDB_UC_MSMB4LZ4	44906	20218	0.450229	30881	0.687681	64193	1.4295
IBDMDB_UC_MSMB4LZP	27475	12151	0.442257	18747	0.682329	40048	1.45762
IBDMDB_UC_MSMB4LZR	33559	14774	0.44024	22617	0.673947	48968	1.45916
IBDMDB_UC_PSM6XBSE	18368	8532	0.464503	12863	0.700294	26074	1.41953
IBDMDB_UC_PSM6XBT3	17613	7526	0.427298	11887	0.674899	26693	1.51553
IBDMDB_UC_PSM6XBT5	12377	4871	0.393553	8230	0.664943	17472	1.41165
IBDMDB_UC_PSM6XBT7	24345	10810	0.444034	16790	0.689669	36599	1.50335
IBDMDB_UC_PSM6XBT9	8656	3419	0.394986	5901	0.681724	11522	1.3311
IBDMDB_UC_PSM6XBTB	27769	12036	0.433433	18765	0.675754	41942	1.51039
IBDMDB_UC_PSM6XBVI	43635	19872	0.455414	30164	0.69128	66378	1.52121
IBDMDB_UC_PSM6XBVK	20743	9131	0.440197	14074	0.678494	30624	1.47635
IBDMDB_UC_PSM6XBVM	36510	16121	0.44155	25025	0.685429	53025	1.45234
IBDMDB_UC_PSM6XBVO	35975	16660	0.463099	24980	0.694371	55280	1.53662
IBDMDB_UC_PSM6XBVQ	36359	16864	0.463819	24950	0.686212	54974	1.51198
IBDMDB_UC_PSM6XBVS	36361	17257	0.474602	25210	0.693325	55938	1.53841
IBDMDB_UC_PSM7J127	37502	17333	0.462189	26024	0.693936	58492	1.5597
IBDMDB_UC_PSM7J12B	40073	17862	0.445737	27488	0.685948	60509	1.50997
IBDMDB_UC_PSM7J12D	29101	13373	0.459537	19898	0.683757	46599	1.60129
IBDMDB_UC_PSM7J12F	22121	10195	0.460874	15152	0.68496	35699	1.61381
IBDMDB_UC_PSM7J12V	34897	15505	0.444308	23827	0.682781	50945	1.45987
IBDMDB_UC_PSM7J12Z	64912	29124	0.448669	44595	0.687007	94574	1.45696
IBDMDB_UC_PSM7J169	37144	17612	0.474155	25733	0.69279	57649	1.55204
IBDMDB_UC_PSM7J16B	8401	5529	0.658136	7005	0.833829	13359	1.59017
IBDMDB_UC_PSM7J16F	35425	15694	0.44302	24110	0.680593	53381	1.50687
IBDMDB_UC_PSM7J16H	27	0	0	0	0	0	0
IBDMDB_UC_PSM7J18Q	37859	17111	0.451967	25816	0.681899	57589	1.52114
IBDMDB_UC_PSM7J193	25758	11529	0.447589	17480	0.678624	40033	1.5542
IBDMDB_UC_PSM7J1AM	28615	12691	0.443509	19325	0.675345	43390	1.51634
IBDMDB_UC_PSM7J1AO	27850	12403	0.44535	18801	0.675081	42634	1.53084
IBDMDB_UC_PSM7J1AQ	32919	14682	0.446004	22605	0.686686	49861	1.51466
IBDMDB_UC_PSM7J1AS	40049	18309	0.457165	27501	0.686684	61761	1.54214
IBDMDB_UC_PSM7J1AU	28998	13255	0.4571	19939	0.687599	45577	1.57173
IBDMDB_UC_PSM7J1B7	37160	16875	0.454117	25670	0.690797	57181	1.53878
IBDMDB_UC_PSM7J1B9	40458	17528	0.433239	27969	0.69131	58304	1.4411
IBDMDB_UC_PSM7J1BB	44482	20908	0.470033	31442	0.706848	65627	1.47536
IBDMDB_UC_PSM7J1BD	44099	19496	0.442096	30613	0.694188	63267	1.43466
IBDMDB_UC_PSM7J1BF	53288	24347	0.456895	37153	0.697211	78890	1.48045
IBDMDB_UC_PSM7J1BV	45502	19260	0.423278	30469	0.669619	65165	1.43213
IBDMDB_UC_PSM7J1BX	38735	17520	0.452304	26763	0.690926	56703	1.46387
IBDMDB_UC_PSM7J1C4	48714	20399	0.41875	32212	0.661247	67280	1.38112
IBDMDB_UC_PSMA264K	43852	19913	0.454096	30909	0.704848	64012	1.45973
IBDMDB_UC_PSMA264O	31124	13924	0.447372	21410	0.687894	45438	1.4599
IBDMDB_UC_PSMA264Q	28622	12389	0.432849	19614	0.685277	40487	1.41454
IBDMDB_UC_PSMA264S	27544	12367	0.448991	19033	0.691003	39773	1.44398
IBDMDB_UC_PSMA264U	40646	17022	0.418787	27981	0.688407	55806	1.37298
IBDMDB_UC_PSMA264W	41360	17680	0.427466	28337	0.685131	57155	1.38189
IBDMDB_UC_PSMA265X	34336	14288	0.416123	23304	0.678705	47199	1.37462
IBDMDB_UC_PSMA266U	28933	13455	0.46504	21308	0.73646	41162	1.42267
IBDMDB_UC_PSMA266Y	33076	14662	0.443282	23083	0.697878	48125	1.45498
IBDMDB_UC_PSMA2671	34705	15279	0.440254	24581	0.708284	48835	1.40715
IBDMDB_UC_PSMA2675	44906	19782	0.44052	32066	0.714069	63068	1.40444
IBDMDB_UC_PSMA267J	49001	21131	0.431236	33329	0.68017	69908	1.42666
IBDMDB_UC_PSMA267P	46861	21562	0.460127	32370	0.690766	71062	1.51644
IBDMDB_UC_PSMA267R	31074	13673	0.440014	21595	0.694954	42731	1.37514
IBDMDB_UC_PSMA269S	36157	15451	0.427331	25271	0.698924	50229	1.38919
IBDMDB_UC_PSMA269W	39843	17281	0.433727	27445	0.688829	55686	1.39764
IBDMDB_UC_PSMA26A1	49551	22732	0.45876	35027	0.706888	70992	1.43271
IBDMDB_UC_PSMA26A3	33406	14988	0.448662	23646	0.707837	47618	1.42543
IBDMDB_UC_PSMB4MBI	40371	17991	0.445642	28274	0.700354	57005	1.41203
IBDMDB_UC_PSMB4MBK	41939	18689	0.445623	29396	0.700923	57691	1.37559
IBDMDB_UC_PSMB4MC1	48954	22460	0.458798	34079	0.696143	73751	1.50654
IBDMDB_UC_PSMB4MC3	25897	11327	0.437387	17803	0.687454	38347	1.48075
IBDMDB_UC_PSMB4MC5	28167	13046	0.463166	20188	0.716725	40313	1.43121
IBDMDB_UC_PSMB4MC7	22574	9819	0.434969	15299	0.677727	30981	1.37242
G35127_CD	35686	21174	0.593342	27927	0.782576	58846	1.64899
G35128_CD	54839	24643	0.44937	38780	0.707161	75471	1.37623
G35152_CD	33821	16920	0.500281	24940	0.737412	50718	1.4996
G36347_CD	28598	15785	0.551962	22029	0.770299	43034	1.50479
G36348_CD	6537	3101	0.474377	4543	0.694967	9013	1.37877
G36349_CD	76397	40495	0.53006	57888	0.757726	117294	1.53532
G36350_CD	76279	38927	0.510324	56138	0.735956	117170	1.53607
G36351_CD	68812	33702	0.489769	50616	0.735569	98569	1.43244
G36352_CD	80092	41802	0.521925	59703	0.74543	125185	1.56302
G36353_CD	80902	40509	0.500717	58052	0.71756	121635	1.50349
G36354_CD	1618	619	0.382571	1133	0.700247	1933	1.19468
G36355_CD	47358	24316	0.513451	35085	0.740846	70391	1.48636
G36356_CD	86226	40686	0.471853	61202	0.709786	123999	1.43807
G36357_CD	67955	33175	0.488191	48460	0.713119	101720	1.49687
G36358_CD	78135	40240	0.515006	58194	0.744788	118721	1.51943
G36359_CD	46741	24025	0.514003	35221	0.753535	70935	1.51762
G36360_CD	20141	8725	0.433196	13324	0.661536	28905	1.43513
G36361_CD	29489	15386	0.521754	22480	0.762318	43210	1.46529
G36362_CD	78978	38293	0.484857	57286	0.725341	115093	1.45728
G36363_CD	68366	36354	0.531756	51353	0.751148	105692	1.54597
G36365_CD	72931	36418	0.499349	52711	0.722752	109403	1.50009
G36366_CD	54997	28764	0.52301	41242	0.749895	86688	1.57623
G36367_CD	63677	31725	0.498218	46393	0.728568	91625	1.4389
G36368_CD	80290	40377	0.50289	59992	0.747191	119875	1.49303
G36369_CD	42820	23528	0.549463	32526	0.759598	66670	1.55698
G36370_CD	38992	23471	0.601944	30237	0.775467	62765	1.60969
G36371_CD	88545	41031	0.463391	63078	0.712384	123363	1.39322
G36372_CD	83265	41282	0.495791	60994	0.732529	123527	1.48354
G36374_CD	51760	26738	0.516577	37663	0.727647	79540	1.53671
G36375_CD	72825	36142	0.496286	53326	0.732249	109916	1.50932
G36378_CD	59751	29752	0.497933	43392	0.726214	91002	1.52302
G36379_CD	72841	36236	0.497467	53969	0.740915	106716	1.46505
G36380_CD	76124	39865	0.523685	56429	0.741277	116676	1.53271
G36381_CD	50775	28865	0.568488	39019	0.768469	81186	1.59894
G36382_CD	55876	30271	0.541753	42150	0.754349	84175	1.50646
G36383_CD	23243	15042	0.647163	18131	0.780063	39677	1.70705
G36384_CD	12933	7950	0.614707	9991	0.77252	20210	1.56267
G36385_CD	12406	7520	0.606158	9774	0.787845	20841	1.67991
G36386_CD	42988	20357	0.473551	30942	0.719782	62549	1.45503
G36387_CD	51682	27226	0.526798	38318	0.741419	81815	1.58305
G36389_CD	36777	18876	0.513256	27058	0.735732	56506	1.53645
G36390_CD	51496	24943	0.484368	37837	0.734756	76769	1.49078
G36392_CD	58783	29889	0.508463	44098	0.750183	89398	1.52081
G36394_CD	63267	35320	0.558269	48394	0.764917	99772	1.577
G36395_CD	72954	36902	0.505826	54392	0.745566	108073	1.48139
G36396_CD	16000	9198	0.574875	12296	0.7685	25425	1.58906
G48777_CD	114033	59807	0.524471	84624	0.742101	179516	1.57425
G48780_CD	137055	68577	0.500361	100901	0.736208	206845	1.50921
G48781_UC	66902	32868	0.491286	48003	0.717512	97056	1.45072
G48783_Control	204381	100772	0.49306	148089	0.724573	303621	1.48556
G48784_UC	171456	83764	0.488545	124372	0.725387	251705	1.46804
G48786_CD	42557	23676	0.556336	32411	0.76159	67239	1.57998
G48787_Control	156821	78099	0.498014	113587	0.72431	235412	1.50115
G48789_Control	292280	142263	0.486735	209425	0.716522	430567	1.47313
G48790_Control	294923	135829	0.460558	200741	0.680656	408730	1.38589
G48791_UC	251287	119799	0.476742	177575	0.706662	366849	1.45988
G48792_Control	220070	108302	0.492125	158409	0.719812	331773	1.50758
G48793_Control	169055	84015	0.496968	124738	0.737855	248420	1.46946
G48794_UC	210086	98321	0.468004	148222	0.70553	303018	1.44235
G48795_CD	152420	76138	0.499528	110717	0.726394	231736	1.52038
G48796_CD	183644	91769	0.499711	132855	0.723438	277222	1.50956
G48798_Control	200529	98727	0.492333	144174	0.718968	298091	1.48652
G48799_UC	176693	85134	0.481819	126987	0.718687	261401	1.47941
G48802_UC	181945	87829	0.482723	129189	0.710044	271123	1.49014
G48804_CD	36010	22375	0.621355	28101	0.780367	60486	1.6797
G48805_CD	11193	7466	0.667024	8864	0.791924	18237	1.62932
G48806_CD	48422	25374	0.524018	35662	0.736483	76558	1.58106
G48807_CD	181938	92600	0.508965	133525	0.733904	275184	1.51252
G48808_Control	155765	74371	0.477456	112334	0.721176	227026	1.45749
G48810_CD	104139	52297	0.502185	75497	0.724964	158651	1.52345
G48812_UC	167370	83355	0.498028	122613	0.732586	255458	1.52631
G48814_UC	77796	41680	0.53576	57955	0.744961	119191	1.5321
G48815_CD	127382	64128	0.503431	93300	0.732443	193960	1.52266
G48817_CD	209476	95503	0.455914	144965	0.692036	296099	1.41352
G48819_CD	52836	32659	0.61812	40883	0.773772	84366	1.59675
G48820_CD	63154	38075	0.602891	48167	0.762691	105698	1.67365
G48821_UC	51306	29760	0.580049	39423	0.76839	83674	1.63088
G48822_UC	38161	23071	0.60457	29208	0.765389	62336	1.6335
G48823_CD	158832	78096	0.491689	115206	0.725332	239331	1.50682
G48826_Control	218379	107129	0.490565	156583	0.717024	326908	1.49698
G48827_CD	113645	55990	0.492675	82583	0.726675	168643	1.48395
G48831_Control	158967	78604	0.494467	114601	0.720911	237498	1.49401
G48832_UC	113152	59358	0.524586	85071	0.751829	176906	1.56344
G48836_UC	40062	23594	0.588937	30367	0.758	65493	1.63479
G48838_CD	189186	94393	0.498943	136973	0.724012	292007	1.54349
G48839_CD	133914	68280	0.509879	97073	0.724891	205010	1.53091
G48840_UC	77362	37055	0.478982	56454	0.729738	109799	1.41929
G48841_CD	72996	38900	0.532906	55099	0.754822	113472	1.5545
G48842_CD	107039	57492	0.537113	79076	0.738759	170268	1.59071
G72670_CD	36410	19949	0.547899	27704	0.76089	56533	1.55268
G72671_CD	81852	39672	0.48468	58929	0.719946	124205	1.51743
G72672_UC	63009	30672	0.486788	46301	0.734832	91083	1.44556
G72673_UC	77953	39393	0.505343	57749	0.740818	116968	1.50049
G72674_UC	78089	40454	0.51805	58644	0.750989	118855	1.52205
G72675_UC	78362	38679	0.493594	57367	0.732077	113008	1.44213
G72676_UC	78113	39777	0.509224	58196	0.745023	114716	1.46859
G72677_UC	34247	16029	0.468041	24949	0.728502	48098	1.40444
G72678_UC	79265	36048	0.454778	55909	0.705343	112469	1.4189
G72679_UC	45639	22995	0.503845	34146	0.748176	68331	1.49721
G72680_UC	74436	36878	0.495432	55248	0.742222	109675	1.47341
G72681_UC	79255	38634	0.487465	58126	0.733405	116024	1.46393
G72682_UC	76619	36146	0.471763	54761	0.714718	110589	1.44336
G72683_UC	91653	43443	0.473994	67365	0.735	129165	1.40928
G72684_UC	96807	47961	0.495429	70858	0.731951	143998	1.48748
G72685_UC	45968	22996	0.500261	34454	0.749521	69822	1.51893
G72686_UC	176	13	0.0738636	6	0.0340909	19	0.107955
G72687_UC	266	42	0.157895	54	0.203008	100	0.37594
G72688_UC	90887	41451	0.456072	65114	0.716428	126456	1.39135
G72689_UC	78724	39509	0.501867	57877	0.735189	118572	1.50617
G72690_UC	110012	51050	0.46404	77753	0.706768	158444	1.44024
G72691_UC	55549	28680	0.516301	42359	0.762552	84800	1.52658
G72692_UC	6959	2595	0.372898	4247	0.610289	8835	1.26958
G72693_UC	97526	43680	0.447881	69213	0.709688	134541	1.37954
G72694_UC	71507	35286	0.493462	52397	0.732753	108162	1.51261
G72695_UC	90189	41086	0.455554	63417	0.703157	126621	1.40395
G72696_UC	81385	39501	0.48536	58098	0.713866	121817	1.4968
G72697_UC	87147	39668	0.455185	61791	0.709043	128170	1.47073
G72698_UC	35448	21689	0.611854	27518	0.776292	57511	1.6224
G72699_UC	9383	3788	0.403709	6631	0.706704	12134	1.29319
G72701_UC	91915	40516	0.440799	62990	0.685307	126393	1.37511
G72702_UC	59508	27676	0.46508	42461	0.713534	87383	1.46842
G72703_UC	87634	40562	0.462857	62122	0.70888	124143	1.41661
G72704_UC	56736	31785	0.560226	43341	0.763907	89424	1.57614
G72705_UC	88936	42320	0.475848	63097	0.709465	128864	1.44895
G72706_UC	94841	44125	0.465252	67204	0.708596	134964	1.42306
G72708_UC	39222	18368	0.468309	28817	0.734715	55006	1.40243
G72709_UC	69094	34949	0.505818	51032	0.738588	107803	1.56024
G72710_UC	72592	34726	0.478372	51273	0.706318	103055	1.41965
G72711_UC	61139	32200	0.526669	46165	0.755083	93699	1.53256
G72712_UC	52949	24884	0.469962	37810	0.714083	76899	1.45232
G72713_UC	51179	24496	0.478634	35733	0.698197	77069	1.50587
G72714_Control	86141	43463	0.504556	63505	0.737222	128253	1.48887
G72715_Control	56885	29808	0.524005	43111	0.757862	85037	1.49489
G72716_Control	86944	38808	0.446356	61609	0.708606	117951	1.35663
G72717_Control	97679	44951	0.460191	70795	0.724772	135963	1.39194
G72718_Control	98046	44057	0.44935	68933	0.703068	139580	1.42362
G72719_Control	94448	45665	0.483494	68006	0.720036	137593	1.45681
G72720_Control	82058	41043	0.500171	59880	0.729728	121821	1.48457
G72721_Control	78935	39327	0.49822	58039	0.735276	118590	1.50238
G72722_Control	87559	42492	0.485296	64468	0.736281	128840	1.47146
G72723_Control	94759	43132	0.455176	67884	0.716386	132052	1.39356
G72724_Control	86424	43364	0.501759	63631	0.736265	128503	1.48689
G72725_Control	96430	46446	0.481655	69789	0.723727	140676	1.45884
G72726_Control	115663	52624	0.454977	82011	0.709051	160723	1.38958
G72727_Control	88788	40350	0.454453	62797	0.707269	126111	1.42036
G72728_Control	86213	42614	0.494287	63882	0.740979	128342	1.48866
G72729_Control	115277	53809	0.46678	82394	0.714748	162733	1.41167
G72730_Control	77234	41629	0.538998	58459	0.756908	120017	1.55394
G72731_Control	112720	51044	0.452839	80154	0.711089	157481	1.3971
G72732_Control	114077	54156	0.474732	82963	0.727254	162605	1.4254
G72733_Control	89728	42192	0.470221	64661	0.720633	131419	1.46464
G72734_Control	102143	50279	0.492241	75294	0.737143	149256	1.46125
G72735_Control	104575	49684	0.475104	75935	0.72613	147954	1.41481
G72736_Control	90523	43830	0.484186	65809	0.726987	134264	1.4832
G72737_Control	92815	44041	0.474503	66043	0.711555	135865	1.46383
G82589_Control	52752	24610	0.466523	37782	0.716219	72974	1.38334
G82627_Control	75420	36797	0.487894	55442	0.73511	108987	1.44507
G82666_Control	78608	38765	0.493143	58060	0.738602	112317	1.42882
G82698_Control	71490	36428	0.509554	53823	0.752875	106377	1.488
G82708_Control	62475	30917	0.49487	45530	0.728772	89420	1.43129
G82738_Control	56413	29500	0.522929	42021	0.744881	85797	1.52087
G82786_Control	69160	36999	0.534977	51580	0.745807	109012	1.57623
G82952_Control	79671	35965	0.451419	56811	0.71307	110214	1.38336
G83001_Control	28922	12408	0.429016	20499	0.708768	38861	1.34365
G83168_Control	13594	5537	0.407312	9622	0.707812	17060	1.25497
G83192_Control	62067	29706	0.478612	45359	0.730807	92318	1.48739
G83234_Control	69923	33254	0.47558	50762	0.72597	98675	1.4112
G83321_Control	45961	19109	0.415766	31633	0.688257	59134	1.28661
G83327_Control	37170	18244	0.490826	27045	0.727603	53233	1.43215
G83335_Control	55561	27656	0.497759	40942	0.736884	81706	1.47056
G83831_Control	100140	48265	0.481975	72580	0.724785	143460	1.43259
G83885_Control	58733	27343	0.465547	42170	0.717995	81388	1.38573
G83901_Control	48582	23941	0.492796	36467	0.750628	69196	1.42431
G83913_Control	84731	37756	0.445598	58823	0.694232	114905	1.35612
G83955_Control	48322	21714	0.449361	34556	0.715119	65850	1.36273
G84104_Control	80298	40510	0.504496	60116	0.748661	118583	1.47679
G84147_Control	80783	36930	0.457151	55709	0.689613	115769	1.43309
G85089_UC	62794	28103	0.447543	45039	0.71725	86213	1.37295
G85117_UC	63939	30278	0.473545	47176	0.737828	91578	1.43227
G85122_CD	23172	12796	0.552218	17782	0.767392	35126	1.51588
G85127_UC	47870	21604	0.451306	34205	0.714539	64820	1.35408
G85128_CD	20032	9441	0.471296	14680	0.732827	30462	1.52067
G85129_UC	51358	25084	0.488415	38411	0.747907	73915	1.43921
G85136_UC	28080	14012	0.499003	20482	0.729416	40926	1.45748
G85161_UC	52664	25607	0.486233	38710	0.735037	76211	1.44712
G85163_CD	54176	28398	0.52418	40899	0.754928	82302	1.51916
G85165_UC	62347	28401	0.455531	44725	0.717356	87630	1.40552
G85166_CD	7550	2847	0.377086	5212	0.690331	9607	1.27245
G85171_UC	39596	19994	0.50495	29424	0.743105	58449	1.47613
G85180_CD	32589	18804	0.577005	25730	0.78953	51987	1.59523
G85181_CD	59899	28048	0.468255	43381	0.724236	83993	1.40224
G85182_UC	58774	30237	0.514462	43032	0.73216	89377	1.52069
G85185_CD	64692	34211	0.528829	48876	0.755518	103003	1.59221
G85199_UC	45631	22121	0.48478	33778	0.740242	66381	1.45473
G85210_CD	47540	23305	0.490219	34744	0.730837	69387	1.45955
G85213_CD	67782	33282	0.491015	49630	0.7322	99427	1.46686
G85226_CD	51006	26596	0.521429	38431	0.75346	78051	1.53023
G85230_CD	60802	31007	0.509967	45420	0.747015	90460	1.48778
G85245_UC	25211	12522	0.496688	18602	0.737853	36536	1.44921
G85246_UC	23965	10354	0.432047	16691	0.696474	31359	1.30853
G85257_UC	44122	20865	0.472893	32046	0.726304	62298	1.41195
G85291_UC	38314	16993	0.443519	27121	0.707861	52975	1.38265
G85315_UC	18023	9653	0.535593	13820	0.766798	26719	1.48249
G85340_UC	66656	32903	0.493624	48695	0.730542	98575	1.47886
G85342_CD	46456	23321	0.502002	33918	0.73011	71409	1.53713
G85361_UC	50798	24678	0.485807	36798	0.724399	71743	1.41232
G85364_UC	51659	23319	0.451402	37017	0.716564	72294	1.39945
G85369_CD	53979	25139	0.465718	39504	0.73184	76546	1.41807
[truncated: 894 more rows]

## Sheet: e) Annotation Prop. Subset
sample	total genes	number of annotated genes	number of tRNAs
C3002C4_MGX	43157	34421	448
C3013C2_MGX	34400	27116	440
M2008C11_MGX	46178	36885	573
M2075C4_MGX	68453	53993	822
M2077C1_MGX	42376	34109	480
P6009C1_MGX	67226	54516	773
IBDMDB_CD_MSM6J2IY	50972	40545	662
IBDMDB_CD_PSM7J199	44005	34695	534
IBDMDB_UC_PSMA267J	49001	38745	545
G48777_CD	114033	94334	1561
G48780_CD	137055	112207	1900
G48783_Control	204381	165196	2694
G48784_UC	171456	138374	2273
G48787_Control	156821	126554	2087
G48789_Control	292280	234108	3994
G48790_Control	294923	225706	4264
G48791_UC	251287	199475	3526
G48792_Control	220070	177821	3137
G48793_Control	169055	137743	2224
G48794_UC	210086	166833	2969
G48795_CD	152420	123782	1744
G48796_CD	183644	148638	2439
G48798_Control	200529	161041	2908
G48799_UC	176693	142474	2270
G48802_UC	181945	145549	2424
G48804_CD	36010	30629	499
G48805_CD	11193	9685	150
G48806_CD	48422	39309	605
G48807_CD	181938	148291	2400
G48808_Control	155765	125734	1952
G48810_CD	104139	84815	1593
G48812_UC	167370	136392	2169
G48814_UC	77796	63651	865
G48815_CD	127382	104600	1578
G48817_CD	209476	163421	2792
G48819_CD	52836	44725	661
G48820_CD	63154	54006	828
G48821_UC	51306	43313	484
G48822_UC	38161	32043	489
G48823_CD	158832	128595	2046
G48826_Control	218379	175042	2908
G48827_CD	113645	91818	1454
G48831_Control	158967	127980	2195
G48832_UC	113152	93568	1572
G48836_UC	40062	33276	559
G48838_CD	189186	153933	2161
G48839_CD	133914	109092	1744
G48841_CD	72996	60466	883
G48842_CD	107039	88338	1501
G83831_Control	100140	80411	1300
AST0002	170476	136091	0
AST0003	157100	127698	0
AST0005	126866	101735	0
AST0008	99271	81848	0
AST0009	49497	40219	0
AST0011	151492	118345	0
AST0013	123572	96429	0
AST0015	106888	85693	0
AST0017	104431	84923	0
AST0018	99717	81156	0
AST0019	132047	105203	0
AST0022	144886	116581	0
AST0023	156434	123797	0
AST0024	159592	125102	0
AST0025	164780	130789	0
AST0026	128323	104234	0
AST0029	139803	113356	0
AST0030	62969	51902	0
AST0031	125834	103236	0
AST0032	115509	92884	0
AST0033	68641	54891	0
AST0034	117045	95042	0
AST0035	79339	64371	0
AST0037	114502	94450	0
AST0038	110055	89226	0
AST0040	96261	75088	0
AST0042	128738	103929	0
AST0044	80646	64762	0
AST0045	102388	83483	0
AST0049	120974	95710	0
AST0050	63630	51090	0
AST0051	110731	90039	0
AST0055	157210	125292	0
AST0056	54426	45798	0
AST0057	32750	27154	0
AST0058	74762	61926	0
AST0060	141243	113992	0
AST0061	173313	138796	0
AST0064	140414	111670	0
AST0066	66371	54499	0
AST0067	102893	81663	0
AST0068	117059	93556	0
AST0069	141431	112967	0
AST0070	170482	134017	0
AST0071	164174	130793	0
AST0072	142174	116224	0
AST0073	132761	105066	0
AST0074	135178	108031	0
AST0075	85914	69740	0
AST0076	158752	129849	0
AST0077	133684	104172	0
AST0078	122087	96607	0
AST0081	153260	122043	0
AST0083	137996	109310	0
AST0086	153307	124231	0
AST0090	115160	93469	0
AST0091	152002	120718	0
AST0092	79057	65186	0
AST0093	95113	78877	0
AST0095	121545	98750	0
AST0098	141773	113964	0
AST0100	73394	58732	0
AST0104	157840	125250	0
AST0105	135985	109710	0
AST0107	132187	107382	0
AST0109	65965	54220	0
AST0112	125026	100423	0
AST0113	166407	134067	0
AST0114	100419	80098	0
AST0115	107724	87680	0
AST0117	116428	93599	0
AST0118	139045	111282	0
AST0119	124100	99821	0
AST0120	149569	117520	0
AST0121	149316	119073	0
AST0122	145595	117332	0
AST0124	149295	116068	0
AST0126	115545	92432	0
AST0127	176553	138995	0
AST0128	182411	146131	0
AST0130	122266	99343	0
AST0131	89801	68945	0
AST0132	22992	20030	0
AST0133	144063	116103	0
AST0134	112158	92324	0
AST0135	110229	88511	0
AST0136	115450	92875	0
AST0139	71896	60239	0
AST0140	133994	106976	0
AST0141	139491	112012	0
AST0145	117783	95986	0
AST0148	161265	126475	0
AST0149	134781	107195	0
AST0153	149259	117148	0
AUS0002	152830	116706	0
AUS0004	97559	76695	0
AUS0014	138012	108549	0
AUS0016	110582	85644	0
AUS0018	138546	106867	0
AUS0020	118829	93313	0
AUS0022	166417	129138	0
AUS0024	152551	116624	0
CAN0001	193045	155179	0
CAN0002	84846	66818	0
CAN0003	224196	174217	0
CAN0004	116425	90917	0
CAN0005	84087	66499	0
CAN0006	224688	179559	0
CAN0007	214514	166721	0
CAN0009	104696	84208	0
CAN0010	78079	62859	0
CAN0011	169857	135560	0
CAN0012	256400	202842	0
CAN0013	146417	115955	0
CAN0014	216859	171834	0
CAN0015	189687	150898	0
CAN0016	192369	152618	0
CAN0017	180396	144497	0
CAN0018	148584	117722	0
CAN0019	36940	29488	0
CAN0020	172854	136510	0
CAN0021	194629	152572	0
CAN0022	145429	113997	0
CAN0023	43254	34769	0
CHI0106	91362	72302	0
CHI0111	149416	118068	0
CHI0116	82043	66703	0
CHI0132	156263	122003	0
CHI0133	91196	71370	0
CHI0138	71271	56238	0
CHI0140	143606	111247	0
CHI0141	138730	110159	0
CHI0143	91470	74806	0
CHI0145	81412	66835	0
CHI0154	141613	109896	0
CHI0162	136970	105776	0
CHI0164	97272	78229	0
CHI0165	86351	69010	0
CHI0167	95393	75640	0
CHI0168	83255	66476	0
CHI0182	128146	102082	0
DEN0001	183443	143633	0
DEN0003	119933	97544	0
DEN0005	151831	118969	0
DEN0007	133529	105082	0
DEN0010	199030	152524	0
DEN0011	190419	143766	0
DEN0012	32415	28442	0
DEN0017	134244	107101	0
DEN0018	169530	130862	0
DEN0021	157143	122434	0
DEN0022	169776	126686	0
DEN0026	138910	110867	0
DEN0028	120383	94302	0
DEN0029	48606	38012	0
DEN0031	134647	105512	0
DEN0033	115951	94026	0
DEN0035	146541	112253	0
DEN0039	73309	54400	0
DEN0041	154995	123133	0
DEN0045	169006	132996	0
DEN0046	91915	69637	0
DEN0051	195740	154789	0
DEN0052	189239	145850	0
DEN0053	50684	34942	0
DEN0061	173843	132991	0
DEN0062	86221	63609	0
DEN0063	204513	158280	0
DEN0064	175938	136570	0
DEN0065	138139	107563	0
DEN0066	153420	117888	0
DEN0067	135369	104800	0
DEN0069	135790	106469	0
DEN0070	156069	121943	0
DEN0071	183733	138087	0
DEN0072	82724	63770	0
DEN0073	213834	163910	0
DEN0078	136628	104339	0
DEN0079	226924	173552	0
DEN0082	181184	140149	0
DEN0083	139002	105980	0
DEN0085	144133	115231	0
DEN0087	46374	35898	0
DEN0090	112041	87502	0
DEN0092	55457	40458	0
DEN0093	153025	121375	0
DEN0094	148389	116501	0
DEN0096	194594	142896	0
DEN0099	38619	29002	0
DEN0100	133513	105551	0
DEN0101	144998	108045	0
DEN0107	78484	58226	0
DEN0108	64675	50414	0
DEN0109	70825	51975	0
DEN0111	83210	63827	0
DEN0114	101282	73966	0
DEN0118	165491	129597	0
DEN0120	50042	35328	0
DEN0121	89187	66837	0
DEN0122	152324	119341	0
DEN0127	58493	45247	0
DEN0131	161100	124596	0
DEN0132	157688	122142	0
DEN0133	179882	133306	0
DEN0134	151221	116817	0
DEN0136	125180	95114	0
DEN0138	47173	36184	0
DEN0139	81661	60519	0
DEN0143	127884	101918	0
DEN0144	167160	127198	0
DEN0145	100322	76475	0
DEN0146	143091	111601	0
DEN0149	129492	100859	0
DEN0151	109773	81563	0
DEN0152	33538	24873	0
DEN0153	182519	141318	0
DEN0154	67250	50208	0
DEN0156	142000	111787	0
DEN0158	131794	104552	0
DEN0159	132201	102416	0
DEN0160	90404	66819	0
DEN0161	120389	96128	0
DEN0162	90371	68561	0
DEN0164	70846	53538	0
DEN0165	155072	119027	0
DEN0168	194514	151034	0
DEN0169	119908	94328	0
DEN0173	93543	74130	0
DEN0174	165793	128212	0
DEN0175	80245	62472	0
DEN0178	52314	39210	0
DEN0179	50760	38760	0
DEN0180	145476	113237	0
DEN0181	91787	74356	0
DEN0184	87115	70405	0
DEN0185	181115	140787	0
DEN0188	156706	116859	0
DEN0192	59629	43298	0
DEN0194	134673	106716	0
DEN0195	110396	88945	0
DEN0199	152179	121374	0
DEN0200	119068	89640	0
DEN0202	63509	47657	0
DEN0203	133394	103983	0
DEN0205	109144	86871	0
DEN0212	187490	145713	0
DEN0213	149260	118141	0
DEN0214	134544	102863	0
[truncated: 110 more rows]

## Sheet: f) Palleja et al samples
sample name	SRA accession	Study	Study DOI	Subject	Timepoint (Day)	R1 num reads	R2 num reads	Num populations
[truncated: 57 more rows]
