# Supplementary material for: Microbes with higher metabolic independence are enriched in human gut microbiomes under stress
Source: eLife journal article supplement (doi:10.7554/elife.89862), 2023-09-08
Supplement: supp2 [file elife-89862-supp2-v1.zip]

## Sheet: a) IBD-enriched modules
module	module name	KEGG class	KEGG category	KEGG subcategory	module definition	median PPCN in HEALTHY samples	median PPCN in IBD samples	Wilcoxon p-value	FDR-adjusted p-value	effect size (IBD - healthy)	fraction of samples in which module is present	also enriched in Watson et al (FMT)	number of enzymes	number shared enzymes	proportion shared enzymes	number of compounds	number shared compounds	proportion shared compounds
M00015	Proline biosynthesis, glutamate => proline	Pathway modules	Amino acid metabolism	Arginine and proline metabolism	((K00931 K00147),K12657) K00286	0.711111	0.88	5.33203e-15	1.4913e-14	0.168889	1	Yes	4	0	0	5	1	0.2
M00844	Arginine biosynthesis, ornithine => arginine	Pathway modules	Amino acid metabolism	Arginine and proline metabolism	K00611 K01940 (K01755,K14681)	0.765957	1	4.17941e-13	1.06873e-12	0.234043	1	Yes	4	1	0.25	7	4	0.571429
M00028	Ornithine biosynthesis, glutamate => ornithine	Pathway modules	Amino acid metabolism	Arginine and proline metabolism	(K00618,K00619,K14681,K14682,K00620,K22477,K22478) ((K00930,K22478) K00145,K12659) (K00818,K00821) (K01438,K14677,K00620)	0.692308	0.870968	9.56046e-13	2.34428e-12	0.17866	1	Yes	14	1	0.0714286	6	2	0.333333
M00022	Shikimate pathway, phosphoenolpyruvate + erythrose-4P => chorismate	Pathway modules	Amino acid metabolism	Aromatic amino acid metabolism	(K01626,K03856,K13853) (((K01735,K13829) ((K03785,K03786) K00014,K13832)),K13830) ((K00891,K13829) (K00800,K24018),K13830) K01736	0.785714	1	4.2254e-18	1.48303e-17	0.214286	1	Yes	20	9	0.45	9	3	0.333333
M00023	Tryptophan biosynthesis, chorismate => tryptophan	Pathway modules	Amino acid metabolism	Aromatic amino acid metabolism	(((K01657+K01658,K13503,K13501,K01656) K00766),K13497) (((K01817,K24017) (K01656,K01609)),K13498,K13501) (K01695+(K01696,K06001),K01694)	0.534884	0.666667	1.3899e-15	4.07856e-15	0.131783	1	Yes	20	9	0.45	6	1	0.166667
M00570	Isoleucine biosynthesis, threonine => 2-oxobutanoate => isoleucine	Pathway modules	Amino acid metabolism	Branched-chain amino acid metabolism	(K17989,K01754) K01652+(K01653,K11258) K00053 K01687 K00826	0.617021	0.833333	3.47147e-17	1.10963e-16	0.216312	1	Yes	8	0	0	7	1	0.142857
M00432	Leucine biosynthesis, 2-oxoisovalerate => 2-oxoisocaproate	Pathway modules	Amino acid metabolism	Branched-chain amino acid metabolism	K01649 (K01702,K01703+K01704) K00052	0.688889	0.857143	2.65459e-14	7.09212e-14	0.168254	1	Yes	5	0	0	5	1	0.2
M00017	Methionine biosynthesis, aspartate => homoserine => methionine	Pathway modules	Amino acid metabolism	Cysteine and methionine metabolism	(K00928,K12524,K12525) K00133 (K00003,K12524,K12525) (K00651,K00641) K01739 (K01760,K14155) (K00548,K24042,K00549)	0.0789474	0.225806	1.34822e-17	4.55343e-17	0.146859	0.921212	No	15	7	0.466667	8	4	0.5
M00021	Cysteine biosynthesis, serine => cysteine	Pathway modules	Amino acid metabolism	Cysteine and methionine metabolism	(K00640,K23304) (K01738,K13034,K17069)	1	1.14754	2.5257e-13	6.55218e-13	0.147541	1	No	5	0	0	4	0	0
M00133	Polyamine biosynthesis, arginine => agmatine => putrescine => spermidine	Pathway modules	Amino acid metabolism	Polyamine biosynthesis	(K01583,K01584,K01585,K02626) K01480 K01611 K00797	0.108108	0.25	5.11509e-28	7.63001e-27	0.141892	0.969697	No	7	0	0	6	1	0.166667
M00018	Threonine biosynthesis, aspartate => homoserine => threonine	Pathway modules	Amino acid metabolism	Serine and threonine metabolism	(K00928,K12524,K12525,K12526) K00133 (K00003,K12524,K12525) (K00872,K02204,K02203) K01733	0.5	0.714286	4.46468e-15	1.26854e-14	0.214286	1	Yes	12	7	0.583333	6	5	0.833333
M00007	Pentose phosphate pathway, non-oxidative phase, fructose 6P => ribose 5P	Pathway modules	Carbohydrate metabolism	Central carbohydrate metabolism	K00615 (K00616,K13810) K01783 (K01807,K01808)	0.558824	1	5.33379e-30	2.51992e-28	0.441176	1	Yes	6	6	1	7	7	1
M00010	Citrate cycle, first carbon oxidation, oxaloacetate => 2-oxoglutarate	Pathway modules	Carbohydrate metabolism	Central carbohydrate metabolism	(K01647,K05942) (K01681,K01682) (K00031,K00030)	0	0.142857	4.61915e-27	4.91053e-26	0.142857	0.590909	No	6	0	0	5	1	0.2
M00005	PRPP biosynthesis, ribose 5P => PRPP	Pathway modules	Carbohydrate metabolism	Central carbohydrate metabolism	K00948	1.30909	1.64706	8.37891e-22	3.94691e-21	0.337968	1	Yes	1	0	0	2	2	1
M00004	Pentose phosphate pathway (Pentose phosphate cycle)	Pathway modules	Carbohydrate metabolism	Central carbohydrate metabolism	(K13937,((K00036,K19243) (K01057,K07404))) K00033 K01783 (K01807,K01808) K00615 K00616 (K01810,K06859,K13810,K15916)	0.189189	0.333333	2.47008e-17	8.18787e-17	0.144144	0.981818	No	15	8	0.533333	11	8	0.727273
M00549	Nucleotide sugar biosynthesis, glucose => UDP-glucose	Pathway modules	Carbohydrate metabolism	Other carbohydrate metabolism	(K00844,K00845,K12407,K00886) (K01835,K15779,K15778) (K00963,K12447)	0.27451	0.575758	5.6311e-30	2.51992e-28	0.301248	1	No	10	2	0.2	4	2	0.5
M00909	UDP-N-acetyl-D-glucosamine biosynthesis, prokaryotes, glucose => UDP-GlcNAc	Pathway modules	Carbohydrate metabolism	Other carbohydrate metabolism	K00845 (K01810,K13810,K15916) K00820 K03431 K04042	0.297297	0.542857	4.02528e-23	1.94736e-22	0.24556	0.99697	No	8	5	0.625	7	3	0.428571
M00061	D-Glucuronate degradation, D-glucuronate => pyruvate + D-glyceraldehyde 3P	Pathway modules	Carbohydrate metabolism	Other carbohydrate metabolism	K01812 K00040 (K01686,K08323) K00874 (K01625,K17463)	0.0980392	0.28	5.8191e-20	2.36731e-19	0.181961	0.948485	Yes	7	0	0	7	2	0.285714
M00579	Phosphate acetyltransferase-acetate kinase pathway, acetyl-CoA => acetate	Pathway modules	Energy metabolism	Carbon fixation	(K00625,K13788,K15024) K00925	0.384615	0.725	1.59908e-24	9.87019e-24	0.340385	0.993939	No	4	0	0	3	1	0.333333
M00169	CAM (Crassulacean acid metabolism), light	Pathway modules	Energy metabolism	Carbon fixation	K00029 K01006	0.222222	0.357143	6.46029e-11	1.49782e-10	0.134921	0.990909	No	2	0	0	4	2	0.5
M00705	Multidrug resistance, efflux pump MepA	Signature modules	Gene set	Drug resistance	K18909 K18908	0.451613	0.733333	5.48027e-18	1.88648e-17	0.28172	0.99697	No	2	0	0	0	0
M00627	beta-Lactam resistance, Bla system	Signature modules	Gene set	Drug resistance	K02172 K02171 (K18766,K17836)	0.529412	0.684211	1.46185e-12	3.5361e-12	0.154799	0.993939	No	4	0	0	0	0
M00082	Fatty acid biosynthesis, initiation	Pathway modules	Lipid metabolism	Fatty acid metabolism	(K11262,(K02160+K01961,K11263)+(K01962+K01963,K18472)) (K00665,K00667+K00668,K11533,(K00645 (K00648,K18473)))	0.342105	0.666667	2.23698e-30	2.0021e-28	0.324561	1	Yes	14	4	0.285714	5	4	0.8
M00083	Fatty acid biosynthesis, elongation	Pathway modules	Lipid metabolism	Fatty acid metabolism	K00665,(K00667 K00668),K11533,((K00647,K09458) K00059 (K02372,K01716,K16363) (K00208,K02371,K10780,K00209))	0.980392	1.25	1.85004e-16	5.61284e-16	0.269608	1	Yes	14	4	0.285714	30	3	0.1
M00121	Heme biosynthesis, plants and bacteria, glutamate => heme	Pathway modules	Metabolism of cofactors and vitamins	Cofactor and vitamin metabolism	K01885 K02492 K01845 K01698 K01749 (K01719,K13542,K13543) K01599 (K00228,K02495) (K00230,K00231,K08973) K01772	0.0243902	0.153846	3.53638e-28	5.75466e-27	0.129456	0.751515	No	15	7	0.466667	11	7	0.636364
M00846	Siroheme biosynthesis, glutamyl-tRNA => siroheme	Pathway modules	Metabolism of cofactors and vitamins	Cofactor and vitamin metabolism	K02492 K01845 K01698 K01749 (K01719,K13542,K13543) (K02302,(K00589,K02303,K02496,K13542,K13543)+K02304-K03794)	0.210526	0.404762	6.11328e-26	5.21084e-25	0.194236	0.978788	No	19	16	0.842105	9	8	0.888889
M00899	Thiamine salvage pathway, HMP/HET => TMP	Pathway modules	Metabolism of cofactors and vitamins	Cofactor and vitamin metabolism	K00878 ((K00941 K00788),K14153,K21219)	0.465116	0.775	2.81198e-25	1.93594e-24	0.309884	1	No	5	0	0	6	0	0
M00924	Cobalamin biosynthesis, anaerobic, uroporphyrinogen III => sirohydrochlorin => cobyrinate a,c-diamide	Pathway modules	Metabolism of cofactors and vitamins	Cofactor and vitamin metabolism	(K02302,(K02303,K13542) K02304) (K02190,K03795,K22011) K03394 (K05934,K13541,K21479) K05936 (K02189,K13541) K02188 K05895 (K02191 K03399,K00595) K06042 K02224	0.255814	0.483871	2.37649e-23	1.21541e-22	0.228057	0.978788	Yes	22	7	0.318182	14	3	0.214286
M00120	Coenzyme A biosynthesis, pantothenate => CoA	Pathway modules	Metabolism of cofactors and vitamins	Cofactor and vitamin metabolism	(K00867,K03525,K01947,K09680) ((K01922,K21977) K01598,K13038) (K02318,(K00954,K02201) K00859)	0.708333	0.931818	5.69961e-21	2.37263e-20	0.223485	1	Yes	14	4	0.285714	6	0	0
M00048	Inosine monophosphate biosynthesis, PRPP + glutamine => IMP	Pathway modules	Nucleotide metabolism	Purine metabolism	K00764 (K01945,K11787,K11788,K13713) (K00601,K11175,K08289,K11787,K01492) (K01952,(K23269+K23264+K23265),(K23270+K23265)) (K01933,K11787,K11788 (K01587,K11808,K01589 K01588)) (K01923,K01587,K13713) K01756 (K00602,(K01492,K06863 K11176))	0.823529	1	6.33512e-14	1.66763e-13	0.176471	1	Yes	29	9	0.310345	13	2	0.153846
M00053	Pyrimidine deoxyribonucleotide biosynthesis, CDP => dCTP	Pathway modules	Nucleotide metabolism	Pyrimidine metabolism	(K00524,K00525+K00526,K10807+K10808) (K00940,K18533) (K00527,K21636) K01494 K01520 (K00560,K13998) K00943 K00940	0.0789474	0.243902	6.96504e-29	1.38527e-27	0.164955	0.924242	No	6	2	0.333333	3	1	0.333333
M00052	Pyrimidine ribonucleotide biosynthesis, UMP => UDP/UTP,CDP/CTP	Pathway modules	Nucleotide metabolism	Pyrimidine metabolism	(K13800,K13809,K09903) (K00940,K18533) K01937	0.218182	0.363636	1.75057e-18	6.39495e-18	0.145455	0.99697	No	6	2	0.333333	5	2	0.4
M00051	Uridine monophosphate biosynthesis, glutamine (+ PRPP) => UMP	Pathway modules	Nucleotide metabolism	Pyrimidine metabolism	(K11540,(K11541 K01465),((K01954,K01955+K01956) (K00609+K00610,K00608) K01465)) (K00226,K00254,K17828) (K13421,K00762 K01591)	0.87037	1	1.17431e-15	3.50336e-15	0.12963	1	Yes	19	7	0.368421	8	4	0.5

## Sheet: b) All modules
module	median PPCN in HEALTHY samples	median PPCN in IBD samples	p-value	W statistic	FDR-adjusted p-value	enrichment status	module name	fraction of samples module is present in	effect size (IBD - healthy)
M00001	0.9375	1	0.000295726	14305.5	0.000494719	OTHER	Glycolysis (Embden-Meyerhof pathway), glucose => pyruvate	1	0.0625
M00002	0.952381	1	0.00154808	13923.5	0.00245227	OTHER	Glycolysis, core module involving three-carbon compounds	1	0.047619
M00003	0.75	0.83871	3.96993e-05	14716.5	6.8992e-05	OTHER	Gluconeogenesis, oxaloacetate => fructose-6P	1	0.0887097
M00004	0.189189	0.333333	2.47008e-17	18264.5	8.18787e-17	IBD_ENRICHED	Pentose phosphate pathway (Pentose phosphate cycle)	0.981818	0.144144
M00005	1.30909	1.64706	8.37891e-22	19171.5	3.94691e-21	HMI_AND_IBD	PRPP biosynthesis, ribose 5P => PRPP	1	0.337968
M00006	0.189189	0.333333	3.13635e-17	18242	1.02074e-16	IBD_ENRICHED	Pentose phosphate pathway, oxidative phase, glucose 6P => ribulose 5P	0.981818	0.144144
M00007	0.558824	1	5.33379e-30	20604	2.51992e-28	HMI_AND_IBD	Pentose phosphate pathway, non-oxidative phase, fructose 6P => ribose 5P	1	0.441176
M00008	0	0.0333333	5.24282e-25	17943.5	3.35166e-24	OTHER	Entner-Doudoroff pathway, glucose-6P => glyceraldehyde-3P + pyruvate	0.266667	0.0333333
M00009	0	0.107143	4.66363e-27	19792	4.91053e-26	OTHER	Citrate cycle (TCA cycle, Krebs cycle)	0.578788	0.107143
M00010	0	0.142857	4.61915e-27	19820.5	4.91053e-26	IBD_ENRICHED	Citrate cycle, first carbon oxidation, oxaloacetate => 2-oxoglutarate	0.590909	0.142857
M00011	0.122449	0.210526	6.44361e-13	17232	1.62452e-12	OTHER	Citrate cycle, second carbon oxidation, 2-oxoglutarate => oxaloacetate	0.978788	0.0880773
M00012	0	0.0285714	1.02031e-23	17468	5.37164e-23	OTHER	Glyoxylate cycle	0.233333	0.0285714
M00015	0.711111	0.88	5.33203e-15	17739.5	1.4913e-14	HMI_AND_IBD	Proline biosynthesis, glutamate => proline	1	0.168889
M00016	0.0606061	0.125	7.14618e-13	17214	1.77662e-12	OTHER	Lysine biosynthesis, succinyl-DAP pathway, aspartate => lysine	0.866667	0.0643939
M00017	0.0789474	0.225806	1.34822e-17	18319.5	4.55343e-17	IBD_ENRICHED	Methionine biosynthesis, aspartate => homoserine => methionine	0.921212	0.146859
M00018	0.5	0.714286	4.46468e-15	17757.5	1.26854e-14	HMI_AND_IBD	Threonine biosynthesis, aspartate => homoserine => threonine	1	0.214286
M00019	0.730769	0.869565	3.92372e-10	16475	8.89045e-10	HMI_ENRICHED	Valine/isoleucine biosynthesis, pyruvate => valine / 2-oxobutanoate => isoleucine	1	0.138796
M00020	0.678571	0.736842	0.0130849	13341	0.0196824	OTHER	Serine biosynthesis, glycerate-3P => serine	1	0.0582707
M00021	1	1.14754	2.5257e-13	17334	6.55218e-13	IBD_ENRICHED	Cysteine biosynthesis, serine => cysteine	1	0.147541
M00022	0.785714	1	4.2254e-18	18426.5	1.48303e-17	HMI_AND_IBD	Shikimate pathway, phosphoenolpyruvate + erythrose-4P => chorismate	1	0.214286
M00023	0.534884	0.666667	1.3899e-15	17875	4.07856e-15	HMI_AND_IBD	Tryptophan biosynthesis, chorismate => tryptophan	1	0.131783
M00024	0	0.047619	2.77466e-24	18515	1.60214e-23	OTHER	Phenylalanine biosynthesis, chorismate => phenylpyruvate => phenylalanine	0.363636	0.047619
M00025	0	0.047619	2.77466e-24	18515	1.60214e-23	OTHER	Tyrosine biosynthesis, chorismate => HPP => tyrosine	0.363636	0.047619
M00026	0.588235	0.65625	1.33755e-05	14919	2.39421e-05	HMI_ENRICHED	Histidine biosynthesis, PRPP => histidine	1	0.0680147
M00027	0	0.0487805	3.12634e-24	18096	1.7488e-23	OTHER	GABA (gamma-Aminobutyrate) shunt	0.3	0.0487805
M00028	0.692308	0.870968	9.56046e-13	17188	2.34428e-12	HMI_AND_IBD	Ornithine biosynthesis, glutamate => ornithine	1	0.17866
M00034	0	0	1.8388e-09	13602	3.9656e-09	OTHER	Methionine salvage pathway	0.0666667	0
M00035	0	0.0434783	1.53078e-16	17255.5	4.7243e-16	OTHER	Methionine degradation	0.378788	0.0434783
M00036	0	0	0.0669123	11679	0.0887207	OTHER	Leucine degradation, leucine => acetoacetate + acetyl-CoA	0.0030303	0
M00040	0	0	0.712849	11363	0.879999	OTHER	Tyrosine biosynthesis, chorismate => arogenate => tyrosine	0.0727273	0
M00044	0	0	0.0669123	11679	0.0887207	OTHER	Tyrosine degradation, tyrosine => homogentisate	0.0030303	0
M00045	0.186047	0.230769	0.0160824	13276	0.0239895	OTHER	Histidine degradation, histidine => N-formiminoglutamate => glutamate	0.975758	0.0447227
M00046	0.027027	0.0571429	6.52682e-11	16671	1.49782e-10	OTHER	Pyrimidine degradation, uracil => beta-alanine, thymine => 3-aminoisobutanoate	0.781818	0.0301158
M00048	0.823529	1	6.33512e-14	17481.5	1.66763e-13	HMI_AND_IBD	Inosine monophosphate biosynthesis, PRPP + glutamine => IMP	1	0.176471
M00049	0.966667	1	0.00539675	13599.5	0.00825657	HMI_ENRICHED	Adenine ribonucleotide biosynthesis, IMP => ADP,ATP	1	0.0333333
M00050	0.955556	1.02439	8.78056e-08	15731	1.80658e-07	HMI_ENRICHED	Guanine ribonucleotide biosynthesis, IMP => GDP,GTP	1	0.0688347
M00051	0.87037	1	1.17431e-15	17887.5	3.50336e-15	HMI_AND_IBD	Uridine monophosphate biosynthesis, glutamine (+ PRPP) => UMP	1	0.12963
M00052	0.218182	0.363636	1.75057e-18	18508.5	6.39495e-18	IBD_ENRICHED	Pyrimidine ribonucleotide biosynthesis, UMP => UDP/UTP,CDP/CTP	0.99697	0.145455
M00053	0.0789474	0.243902	6.96504e-29	20421	1.38527e-27	IBD_ENRICHED	Pyrimidine deoxyribonucleotide biosynthesis, CDP => dCTP	0.924242	0.164955
M00060	0	0.047619	2.8416e-27	18405.5	3.39097e-26	OTHER	KDO2-lipid A biosynthesis, Raetz pathway, LpxL-LpxM type	0.284848	0.047619
M00061	0.0980392	0.28	5.8191e-20	18810.5	2.36731e-19	HMI_AND_IBD	D-Glucuronate degradation, D-glucuronate => pyruvate + D-glyceraldehyde 3P	0.948485	0.181961
M00063	0.344828	0.3	0.902386	10530.5	1	OTHER	CMP-KDO biosynthesis	0.987879	-0.0448276
M00064	0.0571429	0.133333	4.37159e-15	17751.5	1.26212e-14	OTHER	ADP-L-glycero-D-manno-heptose biosynthesis	0.860606	0.0761905
M00082	0.342105	0.666667	2.23698e-30	20665.5	2.0021e-28	HMI_AND_IBD	Fatty acid biosynthesis, initiation	1	0.324561
M00083	0.980392	1.25	1.85004e-16	18072.5	5.61284e-16	HMI_AND_IBD	Fatty acid biosynthesis, elongation	1	0.269608
M00086	1.13725	0.933333	0.999998	7849	1	OTHER	beta-Oxidation, acyl-CoA synthesis	1	-0.203922
M00087	0	0.08	1.48814e-28	19344	2.66378e-27	OTHER	beta-Oxidation	0.39697	0.08
M00088	0	0	0.000627598	12552	0.00103064	OTHER	Ketone body biosynthesis, acetyl-CoA => acetoacetate/3-hydroxybutyrate/acetone	0.0515152	0
M00091	0.0851064	0.0322581	1	6817.5	1	OTHER	Phosphatidylcholine (PC) biosynthesis, PE => PC	0.748485	-0.0528483
M00093	0.530612	0.607143	0.000379171	14254.5	0.000628441	OTHER	Phosphatidylethanolamine (PE) biosynthesis, PA => PS => PE	1	0.0765306
M00095	0	0	0.328601	11640	0.42014	OTHER	C5 isoprenoid biosynthesis, mevalonate pathway	0.0151515	0
M00096	0.567568	0.685185	1.05062e-09	16348.5	2.35076e-09	HMI_ENRICHED	C5 isoprenoid biosynthesis, non-mevalonate pathway	1	0.117618
M00098	0.142857	0.0952381	0.999992	8118	1	OTHER	Acylglycerol degradation	0.951515	-0.047619
M00115	0.605263	0.6875	2.57929e-06	15205.5	4.75971e-06	HMI_ENRICHED	NAD biosynthesis, aspartate => quinolinate => NAD	1	0.0822368
M00116	0	0.0769231	5.57401e-31	19449	9.97747e-29	OTHER	Menaquinone biosynthesis, chorismate (+ polyprenyl-PP) => menaquinol	0.357576	0.0769231
M00117	0	0.0333333	6.11188e-29	18105.5	1.36753e-27	OTHER	Ubiquinone biosynthesis, prokaryotes, chorismate (+ polyprenyl-PP) => ubiquinol	0.230303	0.0333333
M00118	0	0.0416667	8.58658e-15	17106	2.32879e-14	OTHER	Glutathione biosynthesis, glutamate => glutathione	0.433333	0.0416667
M00119	0.479167	0.421053	0.9994	8978.5	1	OTHER	Pantothenate biosynthesis, valine/L-aspartate => pantothenate	1	-0.058114
M00120	0.708333	0.931818	5.69961e-21	19009.5	2.37263e-20	HMI_AND_IBD	Coenzyme A biosynthesis, pantothenate => CoA	1	0.223485
M00121	0.0243902	0.153846	3.53638e-28	20239	5.75466e-27	IBD_ENRICHED	Heme biosynthesis, plants and bacteria, glutamate => heme	0.751515	0.129456
M00122	0.485714	0.6	1.44969e-11	16877.5	3.45993e-11	HMI_ENRICHED	Cobalamin biosynthesis, cobyrinate a,c-diamide => cobalamin	1	0.114286
M00123	0.268293	0.333333	1.78947e-06	15266.5	3.37173e-06	OTHER	Biotin biosynthesis, pimeloyl-ACP/CoA => biotin	0.99697	0.0650407
M00124	0	0.0333333	3.28781e-25	18022.5	2.1797e-24	OTHER	Pyridoxal-P biosynthesis, erythrose-4P => pyridoxal-P	0.272727	0.0333333
M00125	0.534884	0.619048	0.000142912	14462.5	0.000241333	HMI_ENRICHED	Riboflavin biosynthesis, plants and bacteria, GTP => riboflavin/FMN/FAD	1	0.0841639
M00126	0.489362	0.5	0.399684	11768	0.5074	HMI_ENRICHED	Tetrahydrofolate biosynthesis, GTP => THF	1	0.0106383
M00127	0.307692	0.125	1	6586.5	1	OTHER	Thiamine biosynthesis, prokaryotes, AIR (+ DXP/tyrosine) => TMP/TPP	0.987879	-0.182692
M00133	0.108108	0.25	5.11509e-28	20279	7.63001e-27	IBD_ENRICHED	Polyamine biosynthesis, arginine => agmatine => putrescine => spermidine	0.969697	0.141892
M00134	0	0	0.999277	9276.5	1	OTHER	Polyamine biosynthesis, arginine => ornithine => putrescine	0.424242	0
M00136	0	0	6.68543e-19	16162.5	2.60151e-18	OTHER	GABA biosynthesis, prokaryotes, putrescine => GABA	0.169697	0
M00140	0.875	0.96	7.6222e-07	15404	1.48302e-06	HMI_ENRICHED	C1-unit interconversion, prokaryotes	1	0.085
M00142	0	0	0.827743	11463.5	0.974776	OTHER	NADH:ubiquinone oxidoreductase, mitochondria	0.00606061	0
M00144	0.4	0.297872	0.999285	9018.5	1	OTHER	NADH:quinone oxidoreductase, prokaryotes	0.981818	-0.102128
M00145	0	0	0.000903752	12340	0.00147065	OTHER	NAD(P)H:quinone oxidoreductase, chloroplasts and cyanobacteria	0.0333333	0
M00149	0	0.0952381	1.42167e-29	18656.5	4.2413e-28	OTHER	Succinate dehydrogenase, prokaryotes	0.278788	0.0952381
M00150	0	0.05	6.96945e-27	18587	6.56596e-26	OTHER	Fumarate reductase, prokaryotes	0.315152	0.05
M00151	0	0	1.46892e-06	12776	2.7972e-06	OTHER	Cytochrome bc1 complex respiratory unit	0.0363636	0
M00153	0	0.0571429	3.06806e-23	18094.5	1.52551e-22	OTHER	Cytochrome bd ubiquinol oxidase	0.321212	0.0571429
M00155	0	0	0.0876142	11743	0.115316	OTHER	Cytochrome c oxidase, prokaryotes	0.00909091	0
M00156	0	0	0.000102084	12251.5	0.000174028	OTHER	Cytochrome c oxidase, cbb3-type	0.0181818	0
M00157	1	1.11111	4.31618e-07	15494	8.49007e-07	HMI_ENRICHED	F-type ATPase, prokaryotes and chloroplasts	1	0.111111
M00159	0.12	0.225806	5.78892e-15	17731	1.59418e-14	OTHER	V/A-type ATPase, prokaryotes	0.99697	0.105806
M00161	0	0	0.0669123	11679	0.0887207	OTHER	Photosystem II	0.0030303	0
M00166	0	0	7.56254e-19	16317.5	2.8802e-18	OTHER	Reductive pentose phosphate cycle, ribulose-5P => glyceraldehyde-3P	0.184848	0
M00168	0.02	0.114286	3.01683e-18	18283	1.08003e-17	OTHER	CAM (Crassulacean acid metabolism), dark	0.630303	0.0942857
M00169	0.222222	0.357143	6.46029e-11	16699	1.49782e-10	IBD_ENRICHED	CAM (Crassulacean acid metabolism), light	0.990909	0.134921
M00175	0	0	9.95945e-07	13098	1.91693e-06	OTHER	Nitrogen fixation, nitrogen => ammonia	0.0575758	0
M00176	0	0.047619	1.70286e-21	18328.5	7.81569e-21	OTHER	Assimilatory sulfate reduction, sulfate => H2S	0.418182	0.047619
M00307	1.33333	1.42553	0.00107715	14015.5	0.00173702	OTHER	Pyruvate oxidation, pyruvate => acetyl-CoA	1	0.0921986
M00308	0	0	3.28484e-06	13712.5	5.99986e-06	OTHER	Semi-phosphorylative Entner-Doudoroff pathway, gluconate => glycerate-3P	0.136364	0
M00338	0	0	5.01436e-06	12662	9.06637e-06	OTHER	Cysteine biosynthesis, homocysteine + serine => cysteine	0.0333333	0
M00345	0.015873	0.0238095	0.00416964	13541	0.00643419	OTHER	Formaldehyde assimilation, ribulose monophosphate pathway	0.506061	0.00793651
M00356	0	0	0.953749	10948.5	1	OTHER	Methanogenesis, methanol => methane	0.0757576	0
M00357	0	0	0.959836	10974	1	OTHER	Methanogenesis, acetate => methane	0.0636364	0
M00358	0	0	0.859139	11245	0.99861	OTHER	Coenzyme M biosynthesis	0.0484848	0
M00363	0	0	0.748791	11514	0.893557	OTHER	EHEC pathogenicity signature, Shiga toxin	0.0030303	0
M00364	0.285714	0.30303	0.0277772	13094	0.0400978	OTHER	C10-C20 isoprenoid biosynthesis, bacteria	0.99697	0.017316
M00365	0.163636	0.105263	0.999999	7722.5	1	OTHER	C10-C20 isoprenoid biosynthesis, archaea	0.936364	-0.0583732
M00417	0	0.0357143	1.63592e-27	18281	2.25253e-26	OTHER	Cytochrome o ubiquinol oxidase	0.266667	0.0357143
M00432	0.688889	0.857143	2.65459e-14	17574.5	7.09212e-14	HMI_AND_IBD	Leucine biosynthesis, 2-oxoisovalerate => 2-oxoisocaproate	1	0.168254
M00525	0	0	1.08558e-09	15314.5	2.399e-09	OTHER	Lysine biosynthesis, acetyl-DAP pathway, aspartate => lysine	0.272727	0
M00526	0.4375	0.565217	7.49059e-08	15760	1.55909e-07	HMI_ENRICHED	Lysine biosynthesis, DAP dehydrogenase pathway, aspartate => lysine	1	0.127717
M00527	0.836735	0.75	0.999354	8995	1	HMI_ENRICHED	Lysine biosynthesis, DAP aminotransferase pathway, aspartate => lysine	1	-0.0867347
M00529	0	0	0.0669123	11679	0.0887207	OTHER	Denitrification, nitrate => nitrogen	0.0030303	0
M00530	0.0222222	0.105263	5.19163e-19	18519.5	2.06512e-18	OTHER	Dissimilatory nitrate reduction, nitrate => ammonia	0.69697	0.0830409
M00533	0	0	7.50871e-17	15644	2.358e-16	OTHER	Homoprotocatechuate degradation, homoprotocatechuate => 2-oxohept-3-enedioate	0.148485	0
M00535	0.2	0.1	1	6871	1	OTHER	Isoleucine biosynthesis, pyruvate => 2-oxobutanoate	0.915152	-0.1
M00545	0	0.0285714	8.05292e-26	17526	6.03336e-25	OTHER	Trans-cinnamate degradation, trans-cinnamate => acetyl-CoA	0.212121	0.0285714
M00546	0	0	0.0669123	11679	0.0887207	OTHER	Purine degradation, xanthine => urea	0.0030303	0
M00549	0.27451	0.575758	5.6311e-30	20601	2.51992e-28	IBD_ENRICHED	Nucleotide sugar biosynthesis, glucose => UDP-glucose	1	0.301248
M00550	0	0.0689655	1.24952e-29	19243.5	4.2413e-28	OTHER	Ascorbate degradation, ascorbate => D-xylulose-5P	0.354545	0.0689655
M00551	0	0	5.07985e-09	13412	1.08249e-08	OTHER	Benzoate degradation, benzoate => catechol / methylbenzoate => methylcatechol	0.0575758	0
M00552	0	0.0571429	5.23444e-29	18583.5	1.33852e-27	OTHER	D-galactonate degradation, De Ley-Doudoroff pathway, D-galactonate => glycerate-3P	0.278788	0.0571429
M00554	0.0196078	0.129032	3.86529e-21	18875	1.64735e-20	OTHER	Nucleotide sugar biosynthesis, galactose => UDP-galactose	0.645455	0.109424
M00555	0	0.0322581	2.11066e-26	17821	1.88904e-25	OTHER	Betaine biosynthesis, choline => betaine	0.233333	0.0322581
M00563	0	0	0.278694	11628	0.358893	OTHER	Methanogenesis, methylamine/dimethylamine/trimethylamine => methane	0.00606061	0
M00565	0	0	0.000102084	12251.5	0.000174028	OTHER	Trehalose biosynthesis, D-glucose 1P => trehalose	0.0181818	0
M00567	0	0	0.8343	11285	0.976076	OTHER	Methanogenesis, CO2 => methane	0.0454545	0
M00568	0	0	2.32127e-08	13370	4.88833e-08	OTHER	Catechol ortho-cleavage, catechol => 3-oxoadipate	0.0606061	0
M00569	0	0	0.0166665	11793.5	0.0242545	OTHER	Catechol meta-cleavage, catechol => acetyl-CoA / 4-methylcatechol => propanoyl-CoA	0.00606061	0
M00570	0.617021	0.833333	3.47147e-17	18232.5	1.10963e-16	HMI_AND_IBD	Isoleucine biosynthesis, threonine => 2-oxobutanoate => isoleucine	1	0.216312
M00572	0.185185	0.170213	0.745933	11036.5	0.893557	OTHER	Pimeloyl-ACP biosynthesis, BioC-BioH pathway, malonyl-ACP => pimeloyl-ACP	0.954545	-0.0149724
M00577	0.027027	0.0526316	3.35025e-07	15514.5	6.66327e-07	OTHER	Biotin biosynthesis, BioW pathway, pimelate => pimeloyl-CoA => biotin	0.784848	0.0256046
M00579	0.384615	0.725	1.59908e-24	19674.5	9.87019e-24	IBD_ENRICHED	Phosphate acetyltransferase-acetate kinase pathway, acetyl-CoA => acetate	0.993939	0.340385
M00580	0.015873	0.0238095	0.00392204	13556.5	0.00610475	OTHER	Pentose phosphate pathway, archaea, fructose 6P => ribose 5P	0.506061	0.00793651
M00595	0	0	0.0669123	11679	0.0887207	OTHER	Thiosulfate oxidation by SOX complex, thiosulfate => sulfate	0.0030303	0
M00596	0	0	0.996771	10531	1	OTHER	Dissimilatory sulfate reduction, sulfate => H2S	0.0818182	0
M00608	0	0	0.926517	11221	1	OTHER	2-Oxocarboxylic acid chain extension, 2-oxoglutarate => 2-oxoadipate => 2-oxopimelate => 2-oxosuberate	0.030303	0
M00616	0	0.0333333	2.20548e-27	18124.5	2.81986e-26	OTHER	Sulfate-sulfur assimilation	0.251515	0.0333333
M00617	0	0	0.968156	10861	1	OTHER	Methanogen	0.0818182	0
M00620	0	0	0.916383	11088	1	OTHER	Incomplete reductive citrate cycle, acetyl-CoA => oxoglutarate	0.0666667	0
M00622	0	0	0.0669123	11679	0.0887207	OTHER	Nicotinate degradation, nicotinate => fumarate	0.0030303	0
M00627	0.529412	0.684211	1.46185e-12	17141	3.5361e-12	IBD_ENRICHED	beta-Lactam resistance, Bla system	0.993939	0.154799
M00631	0.319149	0.409091	1.67185e-05	14878.5	2.96298e-05	HMI_ENRICHED	D-Galacturonate degradation (bacteria), D-galacturonate => pyruvate + D-glyceraldehyde 3P	0.99697	0.089942
M00632	0.0196078	0.129032	3.86529e-21	18875	1.64735e-20	OTHER	Galactose degradation, Leloir pathway, galactose => alpha-D-glucose-1P	0.645455	0.109424
M00637	0	0	0.0669123	11679	0.0887207	OTHER	Anthranilate degradation, anthranilate => catechol	0.0030303	0
M00641	0	0	0.0669123	11679	0.0887207	OTHER	Multidrug resistance, efflux pump MexEF-OprN	0.0030303	0
M00642	0	0	0.00125563	12022.5	0.00200677	OTHER	Multidrug resistance, efflux pump MexJK-OprM	0.0121212	0
M00649	0	0	2.19817e-07	13066.5	4.42103e-07	OTHER	Multidrug resistance, efflux pump AdeABC	0.0484848	0
M00651	0.27451	0.178571	1	6879.5	1	OTHER	Vancomycin resistance, D-Ala-D-Lac type	0.969697	-0.0959384
M00652	0.0263158	0.0322581	0.247462	12097.5	0.320983	OTHER	Vancomycin resistance, D-Ala-D-Ser type	0.642424	0.00594228
M00696	0	0.04	6.91246e-26	18287.5	5.62423e-25	OTHER	Multidrug resistance, efflux pump AcrEF-TolC	0.293939	0.04
M00697	0	0.0357143	1.98272e-25	18127.5	1.41962e-24	OTHER	Multidrug resistance, efflux pump MdtEF-TolC	0.281818	0.0357143
M00698	0	0	0.59398	11529	0.743513	OTHER	Multidrug resistance, efflux pump BpeEF-OprC	0.0121212	0
M00700	0	0	2.48893e-06	13514	4.64081e-06	OTHER	Multidrug resistance, efflux pump AbcA	0.106061	0
M00702	0	0	0.0317761	12192	0.0455033	OTHER	Multidrug resistance, efflux pump NorB	0.0636364	0
M00705	0.451613	0.733333	5.48027e-18	18404.5	1.88648e-17	IBD_ENRICHED	Multidrug resistance, efflux pump MepA	0.99697	0.28172
M00725	0	0	0.748791	11514	0.893557	OTHER	Cationic antimicrobial peptide (CAMP) resistance, dltABCD operon	0.0030303	0
M00741	0.27907	0.196078	0.999615	8879	1	OTHER	Propanoyl-CoA metabolism, propanoyl-CoA => succinyl-CoA	0.948485	-0.0829913
M00745	0	0	1.11121e-09	13540.5	2.42568e-09	OTHER	Imipenem resistance, repression of porin OprD	0.0606061	0
M00761	0	0.04	7.09916e-24	18021.5	3.85076e-23	OTHER	Undecaprenylphosphate alpha-L-Ara4N biosynthesis, UDP-GlcA => undecaprenyl phosphate alpha-L-Ara4N	0.29697	0.04
M00793	0.829268	0.921053	2.57217e-05	14798.5	4.51391e-05	OTHER	dTDP-L-rhamnose biosynthesis	1	0.0917843
M00844	0.765957	1	4.17941e-13	17277	1.06873e-12	HMI_AND_IBD	Arginine biosynthesis, ornithine => arginine	1	0.234043
M00846	0.210526	0.404762	6.11328e-26	19925	5.21084e-25	IBD_ENRICHED	Siroheme biosynthesis, glutamyl-tRNA => siroheme	0.978788	0.194236
M00847	0	0	0.228079	12004	0.298002	OTHER	Heme biosynthesis, archaea, siroheme => heme	0.230303	0
M00854	1.28571	1.25	0.971572	10044	1	HMI_ENRICHED	Glycogen biosynthesis, glucose-1P => glycogen/starch	1	-0.0357143
M00855	0.533333	0.583333	0.00697695	13528.5	0.0105837	HMI_ENRICHED	Glycogen degradation, glycogen => glucose-6P	1	0.05
M00866	0.0243902	0	0.998769	9283	1	OTHER	KDO2-lipid A biosynthesis, Raetz pathway, non-LpxL-LpxM type	0.521212	-0.0243902
M00877	0	0	0.0166665	11793.5	0.0242545	OTHER	Kanosamine biosynthesis, glucose 6-phosphate => kanosamine	0.00606061	0
M00878	0	0	1.46137e-18	15979	5.44968e-18	OTHER	Phenylacetate degradation, phenylaxetate => acetyl-CoA/succinyl-CoA	0.157576	0
M00879	0	0.0277778	8.08943e-26	17390.5	6.03336e-25	OTHER	Arginine succinyltransferase pathway, arginine => glutamate	0.2	0.0277778
M00880	0.0212766	0.08	3.46753e-21	18931	1.55172e-20	OTHER	Molybdenum cofactor biosynthesis, GTP => molybdenum cofactor	0.681818	0.0587234
M00881	0.205128	0.195122	0.601286	11360	0.747432	OTHER	Lipoic acid biosynthesis, plants and bacteria, octanoyl-ACP => dihydrolipoyl-E2/H	0.972727	-0.0100063
M00882	0	0	0.969225	10691.5	1	OTHER	Lipoic acid biosynthesis, eukaryotes, octanoyl-ACP => dihydrolipoyl-H	0.130303	0
M00883	0	0	0.505928	11561	0.637754	OTHER	Lipoic acid biosynthesis, animals and bacteria, octanoyl-ACP => dihydrolipoyl-H => dihydrolipoyl-E2	0.0393939	0
M00895	0	0	0.0166665	11793.5	0.0242545	OTHER	Thiamine biosynthesis, prokaryotes, AIR (+ DXP/glycine) => TMP/TPP	0.00606061	0
M00896	0.0416667	0	1	7089.5	1	OTHER	Thiamine biosynthesis, archaea, AIR (+ NAD+) => TMP/TPP	0.627273	-0.0416667
M00899	0.465116	0.775	2.81198e-25	19809	1.93594e-24	IBD_ENRICHED	Thiamine salvage pathway, HMP/HET => TMP	1	0.309884
M00909	0.297297	0.542857	4.02528e-23	19419	1.94736e-22	IBD_ENRICHED	UDP-N-acetyl-D-glucosamine biosynthesis, prokaryotes, glucose => UDP-GlcNAc	0.99697	0.24556
M00914	0	0	0.762945	11346	0.904418	OTHER	Coenzyme A biosynthesis, archaea, 2-oxoisovalerate => 4-phosphopantoate => CoA	0.0515152	0
M00916	0.275	0.384615	1.70059e-07	15638	3.45915e-07	OTHER	Pyridoxal-P biosynthesis, R5P + glyceraldehyde-3P + glutamine => pyridoxal-P	0.984848	0.109615
M00918	0	0	3.40577e-11	13956	8.0215e-11	OTHER	Aerobactin biosynthesis, lysine => aerobactin	0.0757576	0
M00922	0	0	0.00272091	12156.5	0.00427231	OTHER	CMP-Neu5Ac biosynthesis	0.0242424	0
M00923	0	0	0.748791	11514	0.893557	OTHER	UDP-L-FucNAm biosynthesis	0.0030303	0
M00924	0.255814	0.483871	2.37649e-23	19461	1.21541e-22	HMI_AND_IBD	Cobalamin biosynthesis, anaerobic, uroporphyrinogen III => sirohydrochlorin => cobyrinate a,c-diamide	0.978788	0.228057
M00925	0	0	0.0669123	11679	0.0887207	OTHER	Cobalamin biosynthesis, aerobic, uroporphyrinogen III => precorrin 2 => cobyrinate a,c-diamide	0.0030303	0
M00926	0	0	5.00931e-27	17113	4.98148e-26	OTHER	Heme biosynthesis, bacteria, glutamyl-tRNA => coproporphyrin III => heme	0.166667	0
M00930	0	0	0.999617	9221.5	1	OTHER	Menaquinone biosynthesis, futalosine pathway	0.378788	0
M00931	0	0	0.949425	11011	1	OTHER	Menaquinone biosynthesis, modified futalosine pathway	0.0636364	0
M00935	0	0	0.74338	11389	0.893557	OTHER	Methanofuran biosynthesis	0.0393939	0

## Sheet: c) Copy number x samples
module	C3002C4_MGX	C3013C2_MGX	M2008C11_MGX	M2075C4_MGX	M2077C1_MGX	P6009C1_MGX	IBDMDB_CD_MSM6J2IY	IBDMDB_CD_PSM7J199	IBDMDB_UC_PSMA267J	G48777_CD	G48780_CD	G48783_Control	G48784_UC	G48787_Control	G48789_Control	G48790_Control	G48791_UC	G48792_Control	G48793_Control	G48794_UC	G48795_CD	G48796_CD	G48798_Control	G48799_UC	G48802_UC	G48804_CD	G48805_CD	G48806_CD	G48807_CD	G48808_Control	G48810_CD	G48812_UC	G48814_UC	G48815_CD	G48817_CD	G48819_CD	G48820_CD	G48821_UC	G48822_UC	G48823_CD	G48826_Control	G48827_CD	G48831_Control	G48832_UC	G48836_UC	G48838_CD	G48839_CD	G48841_CD	G48842_CD
M00001	7	9	9	14	9	12	10	10	5	28	42	55	45	43	80	94	73	69	47	65	39	50	63	50	47	11	3	14	56	37	30	46	19	34	64	14	18	12	11	46	61	30	46	30	12	47	38	18	31
M00002	7	9	9	14	9	12	10	10	5	28	43	55	45	43	80	103	73	69	47	65	39	50	63	50	47	11	3	14	56	37	30	46	19	34	64	15	18	12	11	46	61	30	46	30	12	47	38	18	31
M00003	5	8	9	14	9	12	10	10	5	28	28	47	38	35	65	59	53	56	44	36	35	46	44	46	38	8	3	4	50	37	27	36	13	31	39	12	14	9	6	36	56	26	46	25	7	43	35	14	27
M00004	6	1	6	8	7	8	4	8	5	11	9	7	8	3	14	6	18	9	6	12	12	5	11	9	12	4	2	4	7	7	8	9	4	12	7	9	9	4	3	8	6	6	8	6	5	22	11	7	6
M00005	13	9	10	17	9	20	15	10	13	51	59	87	71	65	113	124	99	94	72	77	59	76	74	78	69	20	5	19	76	64	43	67	34	57	82	23	23	22	19	58	80	54	64	59	23	74	52	29	48
M00006	6	1	6	8	7	8	4	8	5	11	9	7	8	3	14	6	18	9	6	12	12	5	11	9	12	4	2	4	7	7	8	9	4	12	7	9	9	4	3	8	6	6	8	6	5	22	11	7	6
M00007	6	4	11	10	9	12	8	8	8	29	28	48	27	31	56	30	38	38	33	39	32	41	44	37	36	13	4	13	45	26	21	32	25	33	22	14	17	16	11	32	40	24	37	32	15	40	32	21	32
M00008	0	0	0	0	0	0	0	0	0	0	1	0	0	0	0	0	0	0	0	0	1	0	0	0	0	1	1	0	1	0	0	0	2	1	0	3	3	2	2	0	0	0	0	0	1	0	1	0	1
M00009	0	1	0	0	0	0	0	0	0	3	8	1	2	0	6	5	3	1	1	3	4	1	6	1	5	1	2	0	5	0	2	4	3	3	2	6	3	3	3	2	3	3	2	3	1	3	3	2	3
M00010	0	1	0	0	0	0	0	0	0	3	8	1	2	0	6	5	3	1	1	3	4	1	6	1	5	4	2	1	5	0	2	4	5	3	2	6	9	4	4	2	3	3	2	3	4	3	3	2	3
M00011	3	6	3	3	3	3	3	3	2	9	8	7	6	5	12	11	6	9	6	10	8	6	8	7	14	1	2	0	6	4	6	6	3	7	5	7	3	3	3	7	10	5	6	3	1	12	8	3	7
M00012	0	0	0	0	0	0	0	0	0	1	1	0	1	0	0	0	0	0	0	0	1	0	0	0	0	0	0	0	2	0	0	0	1	1	0	2	4	0	0	0	0	0	0	0	0	0	1	0	1
M00015	7	6	10	15	7	17	12	8	10	30	31	59	43	40	80	73	60	53	40	51	35	51	54	44	43	11	3	11	44	36	32	40	16	27	39	11	12	10	8	37	56	30	42	27	10	46	33	13	26
M00016	0	0	1	2	0	1	0	1	0	4	5	5	7	3	6	11	7	3	3	8	3	2	8	4	5	1	1	0	6	4	5	3	2	3	3	4	4	3	2	5	4	3	6	2	2	5	7	4	4
M00017	0	1	0	0	0	2	1	0	0	4	3	5	8	0	6	10	5	8	8	6	1	4	7	5	5	5	3	3	6	4	5	3	7	2	6	11	8	6	5	0	4	4	3	3	8	2	4	5	3
M00018	3	3	2	7	1	10	9	1	7	16	29	47	42	31	63	56	42	38	35	28	17	42	41	40	31	8	3	8	49	27	21	32	15	17	21	13	7	10	6	24	38	19	35	21	10	30	19	10	20
M00019	7	6	9	13	7	17	14	8	10	27	34	55	45	32	73	62	53	55	40	46	35	54	52	42	43	9	2	11	48	33	32	36	20	25	36	9	11	9	6	39	49	31	42	29	9	44	32	18	30
M00020	8	5	10	12	10	15	9	7	11	24	28	48	34	24	61	46	42	46	37	41	20	39	40	35	37	5	2	7	44	29	27	24	14	25	17	9	10	6	4	26	37	22	38	17	7	32	29	11	18
M00021	11	9	14	17	13	20	15	12	13	34	39	72	53	53	98	91	76	81	61	70	51	68	68	55	58	13	3	17	68	45	28	54	25	39	57	11	16	18	13	50	69	32	51	35	16	57	38	22	39
M00022	7	7	5	10	1	12	9	5	7	32	41	66	55	44	91	101	72	73	57	65	35	56	65	50	51	12	2	12	51	43	34	46	20	33	51	10	15	13	8	45	61	32	48	33	11	44	36	18	30
M00023	5	7	6	10	5	11	8	5	7	22	18	35	23	19	58	39	38	35	31	33	25	36	29	32	28	7	2	7	35	28	19	25	13	18	21	12	13	9	5	21	33	21	28	15	6	25	20	13	16
M00024	0	0	0	0	0	0	0	0	0	2	1	1	0	1	0	1	0	0	0	0	1	1	1	0	1	1	2	0	2	1	0	0	1	1	0	4	3	3	3	1	1	1	1	0	1	2	2	0	2
M00025	0	0	0	0	0	0	0	0	0	2	1	1	0	1	0	1	0	0	0	0	1	1	1	0	1	1	2	0	2	1	0	0	1	1	0	4	3	3	3	1	1	1	1	0	1	2	2	0	2
M00026	5	5	7	11	7	15	9	7	7	23	22	43	31	27	60	47	46	37	33	33	26	38	43	29	33	6	2	7	35	27	23	25	12	21	29	8	12	9	5	29	43	24	32	20	7	39	24	15	21
M00027	0	0	0	0	0	0	0	0	0	1	2	1	0	0	1	0	0	0	1	1	1	0	1	1	0	2	0	0	0	0	0	0	2	5	0	4	6	1	2	0	1	0	0	0	2	3	2	0	1
M00028	4	9	4	9	0	12	10	3	7	30	31	52	44	43	75	65	62	51	45	51	36	47	48	47	43	9	3	7	49	32	23	40	21	30	49	10	13	11	7	45	59	27	45	25	10	40	29	16	28
M00034	0	0	0	0	0	0	0	0	0	1	0	0	0	0	0	0	0	0	0	0	0	0	0	0	0	0	1	0	0	0	0	0	0	0	0	2	2	1	1	0	0	0	0	0	0	0	0	0	0
M00035	0	0	0	0	0	0	0	0	0	4	2	0	3	0	3	1	1	1	1	2	0	1	3	1	1	0	1	0	1	0	3	0	0	0	0	2	2	1	1	1	0	2	1	3	1	0	0	1	1
M00036	0	0	0	0	0	0	0	0	0	0	0	0	0	0	0	0	0	0	0	0	0	0	0	0	0	0	0	0	0	0	0	0	0	0	0	0	0	0	0	0	0	0	0	0	0	0	0	0	0
M00040	0	0	0	0	0	0	0	0	0	0	0	0	0	0	0	0	0	0	0	0	0	0	0	0	1	0	0	0	1	0	0	0	0	0	0	0	0	0	0	1	0	0	0	0	0	0	0	0	0
M00044	0	0	0	0	0	0	0	0	0	0	0	0	0	0	0	0	0	0	0	0	0	0	0	0	0	0	0	0	0	0	0	0	0	0	0	0	0	0	0	0	0	0	0	0	0	0	0	0	0
M00045	5	3	7	7	8	8	3	6	4	10	8	12	10	13	14	10	16	15	8	14	13	8	13	10	11	1	1	4	7	11	7	12	2	10	12	5	7	4	2	12	14	5	7	3	1	13	14	5	6
M00046	0	0	1	0	0	0	0	0	1	1	1	1	1	2	1	3	1	2	1	1	2	1	3	0	1	1	0	0	1	0	1	1	1	2	1	2	3	2	1	2	1	1	1	1	1	1	2	1	2
M00048	8	8	9	16	10	20	12	9	10	32	35	54	43	43	86	76	64	60	49	48	35	48	58	47	50	12	3	12	50	37	31	43	20	34	43	14	15	10	9	41	61	29	44	31	13	45	33	19	31
M00049	9	11	10	16	8	19	12	9	11	32	35	62	51	43	90	92	82	70	54	62	36	58	58	49	50	12	3	12	50	41	31	46	18	34	55	13	16	12	10	41	61	32	47	31	13	47	38	18	30
M00050	9	7	12	16	11	17	12	9	9	30	42	60	52	42	88	90	76	69	49	60	41	59	61	51	49	12	3	13	56	42	32	49	20	35	57	14	13	11	10	43	62	34	49	37	12	50	35	17	32
M00051	10	9	8	17	9	20	12	10	11	33	42	63	50	43	83	77	73	60	49	58	36	54	63	46	51	12	3	12	52	44	34	46	18	36	48	16	16	12	11	44	68	31	46	35	14	53	40	18	31
M00052	6	6	5	6	5	7	5	3	5	11	10	11	8	5	19	17	13	15	10	11	11	7	10	8	15	6	3	3	12	9	9	10	5	12	9	15	8	4	5	9	12	7	11	6	5	16	11	2	8
M00053	2	1	0	0	0	1	1	0	0	10	10	4	8	5	5	5	7	6	6	5	11	2	8	5	6	2	1	1	6	2	6	8	5	4	7	5	5	4	4	9	5	6	4	5	5	10	6	2	4
M00060	0	0	0	0	0	0	0	0	0	0	1	0	1	0	0	0	0	0	0	0	0	0	0	0	0	1	1	0	1	0	0	0	1	1	0	4	3	2	2	0	0	0	0	0	1	0	1	1	1
M00061	3	0	0	0	0	1	2	0	0	9	4	8	6	4	7	5	6	5	7	7	7	11	3	6	5	6	1	1	9	5	3	5	8	6	4	6	13	9	9	3	9	3	5	7	7	10	10	10	7
M00063	6	6	7	11	8	11	5	8	7	14	9	18	12	10	22	24	22	14	11	21	11	10	16	13	22	2	2	2	10	14	12	8	3	10	11	11	9	2	2	13	14	9	12	2	1	16	17	3	10
M00064	1	1	0	2	0	4	2	1	0	4	3	4	2	3	4	4	1	1	2	4	3	2	4	1	4	2	2	0	5	3	2	0	1	1	1	8	5	2	2	3	3	2	2	0	1	4	5	2	3
M00082	4	2	1	2	0	5	5	1	1	20	25	33	26	34	44	24	35	27	25	23	28	37	36	28	24	10	2	11	40	24	14	34	15	23	27	8	11	9	10	25	38	22	31	28	10	29	21	16	23
M00083	15	13	18	23	18	25	16	15	13	50	52	73	55	47	96	79	71	62	57	58	43	64	59	50	61	13	5	18	67	49	38	53	21	44	52	23	25	15	13	50	69	46	55	33	13	50	46	25	35
M00086	20	10	30	32	34	40	15	30	31	45	44	52	39	27	101	93	84	57	34	67	34	45	58	47	61	1	1	8	41	47	52	35	5	35	56	4	25	4	2	44	40	32	61	25	6	62	49	14	36
M00087	0	0	0	0	0	0	0	0	0	2	3	0	5	0	0	0	0	0	0	0	3	2	1	0	1	3	1	2	3	0	0	2	7	5	2	6	7	5	6	2	1	2	0	2	2	2	4	1	2
M00088	0	0	0	0	0	0	0	0	0	0	1	0	0	0	0	0	0	0	0	0	0	0	1	0	0	0	0	0	0	0	0	0	1	0	0	1	0	0	0	0	0	0	0	0	0	0	0	0	0
M00091	1	0	0	0	0	2	0	0	0	1	2	3	2	3	15	13	7	13	6	12	1	6	9	4	10	0	0	1	1	4	1	3	4	1	4	3	0	1	0	2	7	1	6	2	1	4	1	0	3
M00093	7	7	9	11	10	10	6	8	7	17	17	35	17	18	43	44	35	34	27	34	17	29	29	25	27	5	2	7	30	24	20	16	9	17	20	11	12	8	7	20	31	14	28	8	5	28	25	10	20
M00095	0	0	0	0	0	0	0	0	0	0	0	0	0	0	0	0	1	1	0	0	0	0	0	0	0	0	0	0	0	0	0	1	0	0	0	0	0	0	0	0	0	0	0	0	0	0	0	0	0
M00096	7	6	6	12	4	12	9	5	5	16	29	47	27	31	51	54	55	34	33	35	22	38	32	38	36	7	2	6	40	31	23	24	14	26	44	9	14	10	8	25	39	16	31	19	8	37	24	13	22
M00098	1	1	1	1	0	0	2	1	1	4	10	7	9	5	16	20	4	17	16	15	4	12	12	3	10	1	0	1	4	2	1	14	3	3	13	2	1	3	1	7	10	3	8	3	2	10	5	5	2
M00115	6	6	8	12	8	13	8	7	7	24	21	43	27	27	55	45	52	41	35	39	24	34	36	30	34	6	1	7	33	31	23	26	12	25	28	5	14	10	6	27	39	19	35	17	7	33	28	13	22
M00116	0	0	0	0	0	0	0	0	0	1	2	1	0	0	1	1	1	0	0	0	2	0	2	0	2	3	2	1	2	0	0	0	3	1	1	6	4	2	2	1	2	1	0	1	1	2	1	1	1
M00117	0	0	0	0	0	0	0	0	0	1	1	0	0	0	0	0	0	0	0	0	1	0	0	0	0	1	1	0	0	0	0	0	1	0	0	3	3	2	2	0	0	0	0	0	1	0	1	0	1
M00118	0	0	0	0	0	0	0	0	0	0	1	0	0	0	1	1	0	0	0	0	1	0	0	0	0	1	1	0	1	0	0	1	2	1	0	3	4	2	2	0	0	0	0	0	1	1	1	0	1
M00119	4	6	7	13	9	13	8	6	7	15	20	30	19	12	40	41	36	28	23	31	14	30	27	20	24	3	1	3	26	25	15	17	8	17	17	8	9	5	5	22	29	13	23	7	3	16	20	6	14
M00120	9	6	8	14	8	16	13	8	12	30	35	55	40	32	71	65	66	46	49	40	32	50	47	40	41	10	3	10	50	42	26	39	16	32	35	14	16	11	10	40	48	27	42	32	11	40	37	13	29
M00121	1	0	0	0	0	1	0	0	0	4	7	3	4	1	4	6	4	1	3	5	4	3	5	0	4	2	2	2	4	1	1	3	5	3	1	8	5	2	2	2	4	2	2	2	1	3	3	2	3
M00122	5	6	6	11	5	14	11	7	7	14	21	41	28	29	60	56	39	36	38	35	24	36	36	37	37	5	1	8	35	38	18	29	11	23	25	9	10	8	8	25	39	16	34	23	7	28	21	12	18
M00123	7	3	7	9	7	11	5	7	6	13	10	17	10	8	24	15	19	13	9	17	15	11	16	14	16	3	2	2	9	14	10	12	3	10	7	9	9	5	2	11	17	9	15	4	2	17	15	1	9
M00124	0	0	0	0	0	0	0	0	0	1	1	0	0	0	0	0	0	0	0	0	1	0	0	0	0	1	1	0	1	0	0	0	1	1	0	3	4	2	2	0	0	0	0	0	1	0	1	0	1
M00125	7	7	9	11	6	15	8	9	10	18	23	35	25	16	42	43	40	35	34	32	19	33	33	25	29	7	3	6	29	32	20	22	11	23	18	12	13	8	6	22	31	16	30	8	8	25	24	8	18
M00126	6	5	8	11	10	12	4	8	9	20	22	25	23	17	43	49	40	25	18	35	19	23	30	23	29	4	2	3	19	24	21	27	5	20	27	8	14	7	5	24	21	13	30	12	4	29	25	4	15
M00127	6	4	3	6	0	6	5	2	4	13	1	21	10	8	25	30	26	16	11	27	1	11	18	12	18	1	1	1	10	14	13	10	2	1	14	3	4	2	2	13	14	7	14	2	1	1	1	4	1
M00133	2	2	1	3	0	2	0	1	1	7	5	8	6	8	8	11	7	5	6	5	9	8	2	7	4	4	2	5	8	2	2	7	6	6	9	6	5	7	7	6	10	7	4	8	4	9	7	4	8
M00134	0	0	0	1	0	1	0	0	0	0	0	2	1	0	2	0	1	1	1	2	1	0	2	1	1	0	0	0	1	1	1	0	0	1	0	0	0	0	0	1	1	1	1	0	0	1	1	0	0
M00136	0	0	0	0	0	0	0	0	0	0	1	0	0	0	0	0	0	0	0	0	0	0	0	0	0	0	1	0	0	0	0	0	0	1	0	1	2	1	1	0	0	0	0	0	0	0	1	0	0
M00140	8	8	11	16	8	17	10	9	10	29	38	67	48	45	90	83	76	70	52	58	37	54	60	48	48	12	3	12	52	42	26	54	19	36	61	10	13	12	8	43	67	26	44	32	11	47	33	16	30
M00142	0	0	0	0	0	0	0	0	0	0	0	0	0	0	0	0	0	0	0	0	0	0	0	0	0	0	0	0	0	0	0	0	0	0	0	0	0	0	0	0	0	0	0	0	0	0	0	0	0
M00144	6	4	10	18	18	11	6	12	12	14	16	20	10	6	28	38	31	21	12	26	9	10	22	14	22	2	2	2	8	18	12	12	2	15	14	8	8	2	4	12	14	8	18	2	2	24	19	4	12
M00145	0	0	0	0	0	0	0	0	0	0	0	0	0	0	0	0	0	0	0	0	0	0	0	0	0	0	0	1	0	1	0	0	0	0	0	0	0	0	0	0	0	0	0	0	0	0	0	0	0
M00149	0	0	0	0	0	0	0	0	0	2	2	0	0	0	0	0	0	0	0	0	2	0	0	0	0	2	2	0	0	0	0	0	2	2	0	5	6	4	4	0	0	0	0	0	2	0	2	0	2
M00150	0	0	0	0	0	0	0	0	0	1	1	0	0	0	0	0	0	0	0	0	1	0	0	0	0	1	1	0	2	0	0	0	1	1	0	4	4	2	2	0	0	0	0	0	1	1	1	1	1
M00151	0	0	0	0	0	0	0	0	0	0	0	0	0	0	0	0	0	0	0	0	0	0	0	0	0	0	0	0	0	0	0	0	0	0	0	1	1	0	0	0	0	0	0	0	0	0	0	0	0
M00153	0	0	0	0	0	0	0	0	0	1	2	0	1	0	0	0	0	0	0	0	1	0	0	0	0	1	1	0	1	0	0	0	3	2	0	4	4	2	3	0	0	0	0	0	2	0	2	0	2
M00155	0	0	0	0	0	0	0	0	0	0	0	0	0	0	0	0	0	0	0	0	0	0	0	0	0	0	0	0	0	0	0	0	0	0	0	0	0	0	0	0	0	0	0	0	0	0	0	0	0
M00156	0	0	0	0	0	0	0	0	0	0	0	0	0	0	0	0	0	0	0	0	0	0	0	0	0	0	0	0	0	0	0	0	0	0	0	1	0	0	0	0	0	0	0	0	0	0	0	1	0
M00157	8	11	9	20	6	21	14	9	14	33	37	73	50	44	92	86	69	65	65	59	39	70	60	59	58	13	3	13	70	57	37	49	24	32	35	12	12	12	10	43	67	35	58	42	14	48	37	20	37
M00159	3	1	8	10	6	1	6	6	5	7	14	7	13	16	12	14	14	12	12	10	14	8	17	11	11	3	0	5	8	8	5	12	8	9	7	1	3	3	5	13	14	12	7	12	3	10	9	8	6
M00161	0	0	0	0	0	0	0	0	0	0	0	0	0	0	0	0	0	0	0	0	0	0	0	0	0	0	0	0	0	0	0	0	0	0	0	0	0	0	0	0	0	0	0	0	0	0	0	0	0
M00166	0	0	0	0	0	0	0	0	0	1	1	0	0	0	0	0	0	0	0	0	0	0	0	0	0	1	1	0	0	0	0	0	0	0	0	3	0	0	0	0	0	0	0	0	0	0	1	0	0
M00168	0	0	0	0	0	0	1	0	0	7	11	3	8	1	7	3	8	4	3	4	4	0	6	2	4	0	0	2	7	0	7	4	1	6	0	2	5	0	0	2	1	7	2	5	0	7	4	3	5
M00169	6	2	7	9	7	9	5	8	7	12	10	13	8	8	16	15	16	11	9	13	9	11	15	7	14	5	0	2	10	12	11	7	3	14	9	3	12	4	6	9	10	8	10	3	5	20	19	2	11
M00175	0	0	0	0	0	0	0	0	0	1	0	0	0	0	0	0	0	0	0	0	0	0	0	0	0	2	0	0	0	0	0	0	1	0	0	2	1	1	4	0	0	0	0	0	1	0	0	0	0
M00176	0	1	0	0	0	0	0	0	0	1	1	1	1	0	0	0	0	0	0	1	0	0	1	0	1	1	1	1	0	0	0	0	2	1	0	3	3	2	2	0	1	0	0	1	1	1	1	0	1
M00307	12	11	18	28	13	30	11	10	13	44	59	93	79	69	117	142	109	97	60	78	58	69	84	67	62	17	3	20	79	55	43	69	30	37	79	23	19	17	21	65	101	49	58	43	15	88	54	23	43
M00308	1	0	0	0	0	0	0	0	0	1	1	0	0	1	0	1	1	1	0	0	1	1	0	1	0	0	0	0	0	0	0	0	1	1	1	0	1	0	0	0	2	0	0	0	0	1	0	1	0
M00338	0	0	0	0	0	0	0	0	0	0	0	0	0	0	0	0	0	0	0	0	0	0	0	0	0	0	0	0	0	0	0	0	0	0	0	0	1	0	0	0	0	0	0	0	0	0	0	0	0
M00345	0	0	0	0	0	0	1	0	0	0	3	1	0	2	3	0	6	5	0	3	5	1	3	0	0	0	1	0	2	3	1	9	3	3	3	1	2	1	1	4	2	2	1	5	1	1	1	0	3
M00356	0	0	0	0	0	0	0	0	0	0	0	0	0	0	0	0	2	1	0	1	0	0	0	0	0	0	0	0	0	0	0	1	0	0	1	0	0	0	0	0	0	0	0	0	0	0	0	0	0
M00357	0	0	0	0	0	0	0	0	0	0	0	0	0	0	0	0	1	1	0	1	0	0	0	0	0	0	0	0	0	0	0	0	0	0	1	0	0	0	0	0	0	0	0	0	0	0	0	0	0
M00358	0	0	0	0	0	0	0	0	0	0	0	0	0	0	0	0	2	1	0	1	0	0	0	0	0	0	0	0	0	0	0	0	0	0	1	0	0	0	0	0	0	0	0	0	0	0	0	0	0
M00363	0	0	0	0	0	0	0	0	0	0	0	0	0	0	0	0	0	0	0	0	0	0	0	0	0	0	0	0	0	0	0	0	0	0	0	0	0	0	0	0	0	0	0	0	0	0	0	0	0
M00364	3	2	3	4	7	11	2	5	4	11	16	26	24	15	33	25	33	21	12	26	9	11	24	18	26	2	2	3	14	19	12	18	4	16	18	8	7	5	2	20	23	13	18	10	3	22	14	5	9
M00365	2	1	3	4	7	7	1	4	4	6	8	11	10	5	15	16	18	8	6	14	3	5	14	8	11	0	0	1	4	10	9	5	1	8	6	0	2	0	0	7	8	5	8	4	1	10	7	2	5
M00417	0	0	0	1	0	0	0	0	0	1	1	0	0	0	0	0	0	0	0	0	1	0	0	0	0	1	1	0	1	0	0	0	1	1	0	3	2	2	2	0	0	0	0	0	1	0	1	0	1
M00432	8	9	9	15	9	16	10	8	9	30	32	54	35	37	73	57	55	48	41	43	37	50	50	38	45	9	3	10	46	35	27	41	21	29	35	9	14	12	6	37	54	27	42	28	9	45	33	16	25
M00525	0	0	0	0	0	0	0	0	0	0	1	1	1	0	1	0	1	1	2	0	1	0	0	0	1	1	1	0	0	0	0	2	0	3	0	3	3	0	0	0	0	1	0	1	3	2	1	0	2
M00526	7	7	6	10	8	10	4	8	6	24	17	26	22	30	40	34	35	26	20	24	27	29	25	21	26	5	1	6	27	23	15	26	11	18	24	4	8	8	2	28	32	17	25	22	3	33	25	15	18
M00527	7	7	9	16	9	18	13	8	10	29	26	54	37	40	85	79	75	60	43	52	33	54	55	44	51	5	1	6	53	41	30	41	11	29	42	5	12	6	3	38	55	28	43	20	3	48	33	12	30
M00529	0	0	0	0	0	0	0	0	0	0	0	0	0	0	0	0	0	0	0	0	0	0	0	0	0	0	0	0	0	0	0	0	0	0	0	0	0	0	0	0	0	0	0	0	0	0	0	0	0
M00530	1	0	0	0	0	1	2	0	1	6	4	2	3	2	2	1	1	0	0	1	6	3	3	1	4	1	2	0	3	2	1	1	1	4	1	7	8	3	3	5	5	3	2	1	1	5	4	0	5
M00533	0	0	0	0	0	0	0	0	0	0	1	0	0	0	0	0	0	0	0	0	0	0	0	0	0	0	1	0	0	0	0	0	0	0	0	2	2	1	1	0	0	0	0	0	0	0	0	0	0
M00535	4	4	8	6	9	8	4	6	7	7	6	10	4	5	14	10	15	12	6	11	7	6	9	9	9	0	0	1	6	10	8	7	0	7	7	0	4	0	0	6	8	4	7	2	0	10	8	1	5
M00545	0	0	0	0	0	0	0	0	0	0	1	0	0	0	0	0	0	0	0	0	1	0	0	0	0	0	1	0	0	0	0	0	1	1	0	2	2	1	1	0	0	0	0	0	1	0	1	0	1
M00546	0	0	0	0	0	0	0	0	0	0	0	0	0	0	0	0	0	0	0	0	0	0	0	0	0	0	0	0	0	0	0	0	0	0	0	0	0	0	0	0	0	0	0	0	0	0	0	0	0
M00549	2	3	2	3	0	6	5	2	3	11	21	25	22	17	26	24	31	20	14	21	12	15	23	20	19	12	4	18	16	9	14	16	12	11	24	14	10	11	11	17	17	14	13	19	14	16	14	7	18
M00550	0	0	0	0	0	0	0	0	0	1	2	0	1	0	0	0	0	0	0	2	2	0	0	0	0	3	1	0	1	0	0	2	2	1	0	5	6	3	3	0	0	0	0	1	2	2	2	0	2
M00551	0	0	0	0	0	0	0	0	0	1	0	0	0	0	0	0	0	0	0	0	0	0	0	0	0	0	1	0	0	0	0	0	0	0	0	1	1	1	1	0	0	0	0	0	0	0	0	0	0
M00552	0	0	0	0	0	0	0	0	0	2	1	0	1	0	0	0	0	0	0	0	1	0	0	0	0	1	1	0	0	0	0	0	2	1	0	4	4	4	2	0	1	0	0	0	2	1	1	0	2
M00554	0	0	0	0	0	1	0	0	0	3	5	0	7	2	3	4	5	5	0	4	2	2	6	4	3	1	1	0	5	0	5	2	2	2	1	4	5	2	2	2	4	4	4	4	3	0	1	3	3
M00555	0	0	0	0	0	0	0	0	0	0	1	0	0	0	0	0	0	0	0	1	1	0	0	0	0	1	1	0	0	0	0	0	1	0	0	2	3	2	2	0	0	0	0	0	0	0	1	0	1
M00563	0	0	0	0	0	0	0	0	0	0	0	0	0	0	0	0	1	0	0	0	0	0	0	0	0	0	0	0	0	0	0	0	0	0	0	0	0	0	0	0	0	0	0	0	0	0	0	0	0
M00565	0	0	0	0	0	0	0	0	0	0	0	0	0	0	0	0	0	0	0	0	0	0	0	0	0	0	0	0	0	0	0	0	0	0	0	2	2	0	0	0	0	0	0	0	0	0	0	0	0
M00567	0	0	0	0	0	0	0	0	0	0	0	0	0	0	0	0	1	1	0	1	0	0	0	0	0	0	0	0	0	0	0	0	0	0	1	0	0	0	0	0	0	0	0	0	0	0	0	0	0
M00568	0	0	0	0	0	0	0	0	0	0	0	0	0	0	0	0	0	0	0	0	0	0	0	0	0	0	1	0	0	0	0	0	0	0	0	1	1	1	1	0	0	0	0	0	0	0	0	0	0
M00569	0	0	0	0	0	0	0	0	0	0	0	0	0	0	0	0	0	0	0	0	0	0	0	0	0	0	0	0	0	0	0	0	0	0	0	0	0	0	0	0	0	0	0	0	0	0	0	0	1
M00570	4	5	5	9	3	12	11	5	7	27	27	54	40	32	70	60	46	50	40	36	34	48	51	38	37	9	2	11	48	33	19	34	20	25	35	9	11	9	6	35	47	25	40	29	9	35	26	18	25
M00572	5	2	6	7	5	8	4	7	7	7	5	7	3	3	12	11	13	8	2	12	8	6	9	8	10	1	1	1	4	7	6	7	1	9	5	4	8	2	2	6	7	4	7	2	1	11	8	0	5
M00577	1	1	0	1	0	1	0	0	0	2	1	3	2	1	3	1	2	1	2	1	1	1	2	1	1	1	1	0	1	3	1	1	0	1	1	3	0	1	0	1	2	1	1	0	0	1	2	1	1
M00579	5	2	2	3	0	3	3	2	2	23	28	28	33	34	49	47	41	39	25	28	31	29	34	25	22	12	3	14	24	24	13	36	25	23	38	12	13	17	11	29	36	25	26	27	10	37	24	18	20
M00580	0	0	0	0	0	0	1	0	0	0	3	1	0	2	3	0	6	5	0	3	5	1	3	0	0	0	1	0	2	3	1	9	3	3	3	1	2	1	1	4	2	2	1	5	1	1	1	0	3
M00595	0	0	0	0	0	0	0	0	0	0	0	0	0	0	0	0	0	0	0	0	0	0	0	0	0	0	0	0	0	0	0	0	0	0	0	0	0	0	0	0	0	0	0	0	0	0	0	0	0
M00596	0	0	0	0	0	0	0	0	0	0	0	0	0	0	1	0	1	0	0	0	0	0	0	0	0	0	0	0	0	0	0	0	0	0	0	1	0	0	0	0	0	0	0	0	0	0	0	0	0
M00608	0	0	0	0	0	0	0	0	0	0	0	0	0	0	0	0	0	0	0	1	0	0	0	0	0	0	0	0	0	0	0	0	0	0	0	0	0	0	0	0	0	0	0	0	0	0	0	0	0
M00616	0	0	0	0	0	0	0	0	0	1	1	0	1	0	0	0	0	0	0	0	0	0	0	0	0	1	1	0	0	0	0	0	1	1	0	3	3	2	2	0	0	0	0	0	1	0	1	0	1
M00617	0	0	0	0	0	0	0	0	0	0	0	0	0	0	0	0	5	3	0	3	0	0	0	0	0	0	0	0	0	0	0	1	0	0	3	0	0	0	0	0	0	0	0	0	0	0	0	0	0
M00620	0	0	0	0	0	0	0	0	0	0	0	0	0	0	0	0	1	1	0	1	0	0	0	0	0	0	0	0	0	0	0	1	0	0	1	0	0	0	0	0	0	0	0	0	0	0	0	0	0
M00622	0	0	0	0	0	0	0	0	0	0	0	0	0	0	0	0	0	0	0	0	0	0	0	0	0	0	0	0	0	0	0	0	0	0	0	0	0	0	0	0	0	0	0	0	0	0	0	0	0
M00627	6	4	11	14	9	11	7	11	10	21	35	38	30	27	47	41	43	40	23	33	29	28	44	34	36	6	0	17	39	35	24	34	16	34	28	0	11	10	4	33	21	28	34	22	10	41	26	9	20
M00631	8	4	5	7	6	8	5	6	7	17	8	23	21	13	28	24	23	24	17	23	18	23	18	23	20	5	1	2	15	21	11	17	7	12	15	5	12	6	5	15	17	12	13	11	5	26	14	12	14
M00632	0	0	0	0	0	1	0	0	0	3	5	0	7	2	3	4	5	5	0	4	2	2	6	4	3	1	1	0	5	0	5	2	2	2	1	4	5	2	2	2	4	4	4	4	3	0	1	3	3
M00637	0	0	0	0	0	0	0	0	0	0	0	0	0	0	0	0	0	0	0	0	0	0	0	0	0	0	0	0	0	0	0	0	0	0	0	0	0	0	0	0	0	0	0	0	0	0	0	0	0
M00641	0	0	0	0	0	0	0	0	0	0	0	0	0	0	0	0	0	0	0	0	0	0	0	0	0	0	0	0	0	0	0	0	0	0	0	0	0	0	0	0	0	0	0	0	0	0	0	0	0
M00642	0	0	0	0	0	0	0	0	0	0	0	0	0	0	0	0	0	0	0	0	0	0	0	0	0	0	0	0	0	0	0	0	0	0	0	1	0	0	0	0	0	0	0	0	0	0	0	0	0
M00649	0	0	0	0	0	0	0	0	0	0	0	0	0	0	0	0	0	0	0	0	0	0	0	0	0	0	1	0	1	0	0	0	0	0	0	1	1	1	0	0	0	0	0	0	0	0	0	0	0
M00651	4	4	4	8	7	8	6	6	6	5	13	13	10	7	22	21	23	17	5	15	9	8	16	17	17	0	0	1	10	12	7	12	0	10	19	3	5	1	1	9	13	5	10	2	1	14	8	1	5
M00652	0	0	0	0	0	0	0	0	0	1	2	2	2	4	2	3	6	1	1	3	4	0	3	2	0	1	0	2	1	1	0	4	0	1	5	0	0	1	1	3	5	0	3	1	0	6	1	2	0
M00696	0	0	0	0	0	0	0	0	0	1	1	0	0	0	0	0	0	0	0	0	1	0	0	0	0	1	1	0	1	0	0	0	1	1	0	2	4	2	2	0	0	0	0	0	1	0	1	0	1
M00697	0	0	0	0	0	0	0	0	0	1	1	0	1	0	0	0	0	0	0	0	1	0	0	0	0	1	1	0	0	0	0	0	1	1	0	1	1	1	1	0	0	0	0	0	1	1	1	0	1
M00698	0	0	0	0	0	0	0	0	0	0	0	0	0	0	0	0	0	0	0	0	0	0	0	0	0	0	0	0	0	0	0	0	0	0	0	0	0	0	0	0	0	0	0	0	0	0	0	0	0
M00700	0	0	0	0	0	0	0	0	0	0	0	0	1	0	0	0	0	0	0	0	0	0	1	0	0	1	0	1	0	0	0	0	0	0	0	3	0	0	0	0	0	1	0	0	1	2	1	0	0
M00702	0	0	0	0	0	0	0	0	0	1	0	0	0	0	0	0	0	0	0	0	0	0	0	0	0	0	0	0	0	0	0	0	0	0	0	2	0	1	0	0	0	0	0	0	0	0	0	0	0
M00705	4	4	2	4	0	4	8	2	3	18	23	41	32	29	53	39	39	41	34	28	34	35	34	37	30	6	1	17	38	26	16	30	22	20	40	3	10	17	5	32	44	20	33	35	14	31	16	16	22
M00725	0	0	0	0	0	0	0	0	0	0	0	0	0	0	0	0	0	0	0	0	0	0	0	0	0	0	0	0	0	0	0	0	0	0	0	0	0	0	0	0	0	0	0	0	0	0	0	0	0
M00741	6	4	7	9	8	11	4	7	6	9	9	14	10	6	1	1	25	14	7	1	13	10	17	13	20	1	1	2	9	10	11	9	1	13	12	2	4	0	0	14	16	7	13	3	0	21	15	1	6
M00745	0	0	0	0	0	0	0	0	0	1	0	0	0	0	0	0	0	0	0	0	0	0	0	0	0	0	1	0	1	0	0	0	0	0	0	1	1	1	1	0	0	0	0	0	0	0	0	0	0
M00761	0	0	0	0	0	0	0	0	0	0	1	0	1	0	1	1	0	0	1	1	1	0	0	0	0	1	1	0	1	0	0	0	1	1	0	3	4	2	2	0	0	0	0	0	1	0	1	0	1
M00793	10	12	14	22	14	15	15	13	11	34	29	51	40	30	75	61	59	58	40	50	35	48	42	40	46	7	1	13	49	43	30	39	17	32	36	8	13	9	9	33	49	26	38	29	11	45	39	14	32
M00844	3	6	4	12	0	10	10	3	8	28	37	67	51	45	87	79	74	56	51	52	36	58	61	49	54	9	3	10	58	42	29	47	19	27	50	13	12	13	9	48	61	34	45	34	11	46	29	17	26
M00846	2	3	0	4	0	2	4	0	0	10	12	20	14	17	24	13	15	12	17	13	12	20	15	12	12	5	2	6	19	12	9	18	9	9	12	9	7	8	7	16	21	13	16	13	5	17	11	7	13
M00847	0	0	0	0	0	0	0	0	0	1	1	1	2	0	4	0	2	0	2	1	2	0	0	0	2	0	0	0	1	0	0	0	1	0	0	1	0	0	0	2	2	1	0	0	0	2	1	0	1
M00854	10	10	8	21	1	24	20	8	9	38	46	79	72	54	120	118	108	95	67	79	45	78	80	74	77	8	2	16	69	62	44	58	23	49	88	9	17	14	10	63	89	37	65	41	11	65	53	24	47
M00855	6	5	8	11	9	13	13	8	11	16	20	27	17	16	35	26	29	24	22	25	18	26	25	25	25	8	2	12	23	23	18	22	8	16	25	4	10	9	9	15	22	18	19	20	13	17	12	5	21
M00866	0	1	0	0	0	0	1	1	0	1	1	1	1	1	2	3	0	0	1	4	1	0	1	1	4	0	0	0	1	1	0	1	0	0	2	3	1	0	0	3	2	1	2	0	0	1	1	1	2
M00877	0	0	0	0	0	0	0	0	0	0	0	0	0	0	0	0	0	0	0	0	0	0	0	0	0	0	0	0	0	0	0	0	0	0	0	0	0	0	0	0	0	0	0	0	0	0	0	0	0
M00878	0	0	0	0	0	0	0	0	0	0	1	0	0	0	0	0	0	0	0	0	0	0	0	0	0	0	1	0	0	0	0	0	0	1	0	2	3	1	1	0	0	0	0	0	0	0	1	0	0
M00879	0	0	0	0	0	0	0	0	0	0	1	0	0	0	0	0	0	0	0	0	0	0	0	0	0	1	1	0	0	0	0	0	1	0	0	3	4	2	3	0	0	0	0	0	1	0	1	0	1
M00880	1	0	0	1	0	1	0	0	1	3	1	2	4	2	4	2	3	2	1	1	2	2	2	0	4	1	2	0	3	2	2	0	1	3	1	7	6	2	2	2	2	2	1	0	1	4	3	2	2
M00881	4	3	7	9	10	8	3	10	7	8	8	11	6	6	15	14	17	9	2	12	8	7	12	9	16	1	1	1	8	8	7	8	2	9	10	4	7	2	2	9	12	6	9	2	1	13	13	2	8
M00882	0	0	0	0	0	1	0	0	0	0	0	1	0	0	0	1	1	0	0	1	0	0	0	1	1	0	0	0	0	1	0	0	0	0	0	0	0	0	0	0	1	0	0	0	0	1	1	0	1
M00883	0	0	0	0	0	0	0	0	0	0	0	1	0	0	0	1	0	0	0	1	0	0	0	0	0	0	0	0	0	0	0	0	0	0	1	0	0	0	0	0	0	0	0	0	0	1	0	0	0
M00895	0	0	0	0	0	0	0	0	0	0	0	0	0	0	0	0	0	0	0	0	0	0	0	0	0	0	0	0	0	0	0	0	0	0	0	0	0	0	0	0	0	0	0	0	0	0	0	0	0
M00896	0	0	3	1	2	1	0	2	1	1	0	2	1	1	3	4	4	5	2	3	2	0	1	1	3	0	0	0	0	0	2	1	0	1	3	0	2	0	0	2	2	0	1	1	0	2	1	0	0
M00899	6	5	2	8	0	9	8	1	3	26	25	41	37	29	59	55	41	35	44	35	22	37	42	33	32	8	3	9	46	31	25	30	22	19	17	13	10	13	10	31	47	23	39	25	12	34	24	13	23
M00909	3	3	2	5	0	7	2	1	3	11	15	25	25	20	33	36	27	20	16	23	11	18	23	24	18	9	3	10	19	13	15	18	12	14	25	16	8	7	8	15	25	14	16	18	11	23	13	7	13
M00914	0	0	0	0	0	0	0	0	0	0	0	0	0	0	0	0	1	1	0	1	0	0	0	0	0	0	0	0	0	0	0	1	0	0	1	0	0	0	0	0	0	0	0	0	0	0	0	0	0
M00916	1	4	1	4	0	4	5	0	2	11	11	20	21	8	38	25	25	25	26	20	10	25	22	19	16	3	0	2	25	16	12	13	7	11	9	2	2	6	2	15	22	14	23	8	5	12	11	7	13
M00918	0	0	0	0	0	0	0	0	0	0	0	0	0	0	0	0	0	0	0	0	0	0	0	0	0	0	0	0	0	0	0	0	1	1	0	0	2	0	0	0	0	0	0	0	1	0	0	0	1
M00922	0	0	0	0	0	0	0	0	0	0	0	0	0	0	1	0	0	0	0	0	0	0	0	0	0	0	0	0	0	0	0	0	0	0	0	0	0	0	0	0	0	0	0	0	0	0	0	0	0
M00923	0	0	0	0	0	0	0	0	0	0	0	0	0	0	0	0	0	0	0	0	0	0	0	0	0	0	0	0	0	0	0	0	0	0	0	0	0	0	0	0	0	0	0	0	0	0	0	0	0
M00924	2	4	0	4	0	2	6	0	0	15	15	21	17	20	30	13	20	17	23	14	21	24	16	15	12	6	2	6	30	15	11	18	8	18	16	7	9	9	7	18	26	14	21	18	6	21	19	9	13
M00925	0	0	0	0	0	0	0	0	0	0	0	0	0	0	0	0	0	0	0	0	0	0	0	0	0	0	0	0	0	0	0	0	0	0	0	0	0	0	0	0	0	0	0	0	0	0	0	0	0
M00926	0	0	0	0	0	0	0	0	0	1	0	0	0	0	0	0	0	0	0	0	1	0	0	0	0	1	1	0	0	0	0	0	1	0	0	3	0	0	0	0	0	0	0	0	0	0	0	0	0
M00930	0	0	1	2	1	0	0	1	0	1	2	2	2	1	4	5	5	1	0	4	0	1	2	1	2	0	0	0	1	1	1	1	0	2	3	0	0	0	0	1	1	0	2	0	0	2	1	1	0
M00931	0	0	0	0	0	0	0	0	0	0	0	0	0	0	1	1	0	0	0	1	0	0	0	0	0	0	0	0	0	0	0	0	0	0	0	1	0	0	0	0	0	0	0	0	0	0	0	1	0
M00935	0	0	0	0	0	0	0	0	0	0	0	0	0	0	0	0	1	1	0	1	0	0	0	0	0	0	0	0	0	0	0	0	0	0	1	0	0	0	0	0	0	0	0	0	0	0	0	0	0
[truncated: 359 more columns]

## Sheet: d) per-sample PPCN data
module	sample	copy number	number of populations	per-population copy number (PPCN)	sample group	sample study
M00001	C3002C4_MGX	7	9	0.777778	IBD	Schirmir_2018
M00002	C3002C4_MGX	7	9	0.777778	IBD	Schirmir_2018
M00003	C3002C4_MGX	5	9	0.555556	IBD	Schirmir_2018
M00004	C3002C4_MGX	6	9	0.666667	IBD	Schirmir_2018
M00005	C3002C4_MGX	13	9	1.44444	IBD	Schirmir_2018
M00006	C3002C4_MGX	6	9	0.666667	IBD	Schirmir_2018
M00007	C3002C4_MGX	6	9	0.666667	IBD	Schirmir_2018
M00008	C3002C4_MGX	0	9	0	IBD	Schirmir_2018
M00009	C3002C4_MGX	0	9	0	IBD	Schirmir_2018
M00010	C3002C4_MGX	0	9	0	IBD	Schirmir_2018
M00011	C3002C4_MGX	3	9	0.333333	IBD	Schirmir_2018
M00012	C3002C4_MGX	0	9	0	IBD	Schirmir_2018
M00015	C3002C4_MGX	7	9	0.777778	IBD	Schirmir_2018
M00016	C3002C4_MGX	0	9	0	IBD	Schirmir_2018
M00017	C3002C4_MGX	0	9	0	IBD	Schirmir_2018
M00018	C3002C4_MGX	3	9	0.333333	IBD	Schirmir_2018
M00019	C3002C4_MGX	7	9	0.777778	IBD	Schirmir_2018
M00020	C3002C4_MGX	8	9	0.888889	IBD	Schirmir_2018
M00021	C3002C4_MGX	11	9	1.22222	IBD	Schirmir_2018
M00022	C3002C4_MGX	7	9	0.777778	IBD	Schirmir_2018
M00023	C3002C4_MGX	5	9	0.555556	IBD	Schirmir_2018
M00024	C3002C4_MGX	0	9	0	IBD	Schirmir_2018
M00025	C3002C4_MGX	0	9	0	IBD	Schirmir_2018
M00026	C3002C4_MGX	5	9	0.555556	IBD	Schirmir_2018
M00027	C3002C4_MGX	0	9	0	IBD	Schirmir_2018
M00028	C3002C4_MGX	4	9	0.444444	IBD	Schirmir_2018
M00034	C3002C4_MGX	0	9	0	IBD	Schirmir_2018
M00035	C3002C4_MGX	0	9	0	IBD	Schirmir_2018
M00036	C3002C4_MGX	0	9	0	IBD	Schirmir_2018
M00040	C3002C4_MGX	0	9	0	IBD	Schirmir_2018
M00044	C3002C4_MGX	0	9	0	IBD	Schirmir_2018
M00045	C3002C4_MGX	5	9	0.555556	IBD	Schirmir_2018
M00046	C3002C4_MGX	0	9	0	IBD	Schirmir_2018
M00048	C3002C4_MGX	8	9	0.888889	IBD	Schirmir_2018
M00049	C3002C4_MGX	9	9	1	IBD	Schirmir_2018
M00050	C3002C4_MGX	9	9	1	IBD	Schirmir_2018
M00051	C3002C4_MGX	10	9	1.11111	IBD	Schirmir_2018
M00052	C3002C4_MGX	6	9	0.666667	IBD	Schirmir_2018
M00053	C3002C4_MGX	2	9	0.222222	IBD	Schirmir_2018
M00060	C3002C4_MGX	0	9	0	IBD	Schirmir_2018
M00061	C3002C4_MGX	3	9	0.333333	IBD	Schirmir_2018
M00063	C3002C4_MGX	6	9	0.666667	IBD	Schirmir_2018
M00064	C3002C4_MGX	1	9	0.111111	IBD	Schirmir_2018
M00082	C3002C4_MGX	4	9	0.444444	IBD	Schirmir_2018
M00083	C3002C4_MGX	15	9	1.66667	IBD	Schirmir_2018
M00086	C3002C4_MGX	20	9	2.22222	IBD	Schirmir_2018
M00087	C3002C4_MGX	0	9	0	IBD	Schirmir_2018
M00088	C3002C4_MGX	0	9	0	IBD	Schirmir_2018
M00091	C3002C4_MGX	1	9	0.111111	IBD	Schirmir_2018
M00093	C3002C4_MGX	7	9	0.777778	IBD	Schirmir_2018
M00095	C3002C4_MGX	0	9	0	IBD	Schirmir_2018
M00096	C3002C4_MGX	7	9	0.777778	IBD	Schirmir_2018
M00098	C3002C4_MGX	1	9	0.111111	IBD	Schirmir_2018
M00115	C3002C4_MGX	6	9	0.666667	IBD	Schirmir_2018
M00116	C3002C4_MGX	0	9	0	IBD	Schirmir_2018
M00117	C3002C4_MGX	0	9	0	IBD	Schirmir_2018
M00118	C3002C4_MGX	0	9	0	IBD	Schirmir_2018
M00119	C3002C4_MGX	4	9	0.444444	IBD	Schirmir_2018
M00120	C3002C4_MGX	9	9	1	IBD	Schirmir_2018
M00121	C3002C4_MGX	1	9	0.111111	IBD	Schirmir_2018
M00122	C3002C4_MGX	5	9	0.555556	IBD	Schirmir_2018
M00123	C3002C4_MGX	7	9	0.777778	IBD	Schirmir_2018
M00124	C3002C4_MGX	0	9	0	IBD	Schirmir_2018
M00125	C3002C4_MGX	7	9	0.777778	IBD	Schirmir_2018
M00126	C3002C4_MGX	6	9	0.666667	IBD	Schirmir_2018
M00127	C3002C4_MGX	6	9	0.666667	IBD	Schirmir_2018
M00133	C3002C4_MGX	2	9	0.222222	IBD	Schirmir_2018
M00134	C3002C4_MGX	0	9	0	IBD	Schirmir_2018
M00136	C3002C4_MGX	0	9	0	IBD	Schirmir_2018
M00140	C3002C4_MGX	8	9	0.888889	IBD	Schirmir_2018
M00142	C3002C4_MGX	0	9	0	IBD	Schirmir_2018
M00144	C3002C4_MGX	6	9	0.666667	IBD	Schirmir_2018
M00145	C3002C4_MGX	0	9	0	IBD	Schirmir_2018
M00149	C3002C4_MGX	0	9	0	IBD	Schirmir_2018
M00150	C3002C4_MGX	0	9	0	IBD	Schirmir_2018
M00151	C3002C4_MGX	0	9	0	IBD	Schirmir_2018
M00153	C3002C4_MGX	0	9	0	IBD	Schirmir_2018
M00155	C3002C4_MGX	0	9	0	IBD	Schirmir_2018
M00156	C3002C4_MGX	0	9	0	IBD	Schirmir_2018
M00157	C3002C4_MGX	8	9	0.888889	IBD	Schirmir_2018
M00159	C3002C4_MGX	3	9	0.333333	IBD	Schirmir_2018
M00161	C3002C4_MGX	0	9	0	IBD	Schirmir_2018
M00166	C3002C4_MGX	0	9	0	IBD	Schirmir_2018
M00168	C3002C4_MGX	0	9	0	IBD	Schirmir_2018
M00169	C3002C4_MGX	6	9	0.666667	IBD	Schirmir_2018
M00175	C3002C4_MGX	0	9	0	IBD	Schirmir_2018
M00176	C3002C4_MGX	0	9	0	IBD	Schirmir_2018
M00307	C3002C4_MGX	12	9	1.33333	IBD	Schirmir_2018
M00308	C3002C4_MGX	1	9	0.111111	IBD	Schirmir_2018
M00338	C3002C4_MGX	0	9	0	IBD	Schirmir_2018
M00345	C3002C4_MGX	0	9	0	IBD	Schirmir_2018
M00356	C3002C4_MGX	0	9	0	IBD	Schirmir_2018
M00357	C3002C4_MGX	0	9	0	IBD	Schirmir_2018
M00358	C3002C4_MGX	0	9	0	IBD	Schirmir_2018
M00363	C3002C4_MGX	0	9	0	IBD	Schirmir_2018
M00364	C3002C4_MGX	3	9	0.333333	IBD	Schirmir_2018
M00365	C3002C4_MGX	2	9	0.222222	IBD	Schirmir_2018
M00417	C3002C4_MGX	0	9	0	IBD	Schirmir_2018
M00432	C3002C4_MGX	8	9	0.888889	IBD	Schirmir_2018
M00525	C3002C4_MGX	0	9	0	IBD	Schirmir_2018
M00526	C3002C4_MGX	7	9	0.777778	IBD	Schirmir_2018
M00527	C3002C4_MGX	7	9	0.777778	IBD	Schirmir_2018
M00529	C3002C4_MGX	0	9	0	IBD	Schirmir_2018
M00530	C3002C4_MGX	1	9	0.111111	IBD	Schirmir_2018
M00533	C3002C4_MGX	0	9	0	IBD	Schirmir_2018
M00535	C3002C4_MGX	4	9	0.444444	IBD	Schirmir_2018
M00545	C3002C4_MGX	0	9	0	IBD	Schirmir_2018
M00546	C3002C4_MGX	0	9	0	IBD	Schirmir_2018
M00549	C3002C4_MGX	2	9	0.222222	IBD	Schirmir_2018
M00550	C3002C4_MGX	0	9	0	IBD	Schirmir_2018
M00551	C3002C4_MGX	0	9	0	IBD	Schirmir_2018
M00552	C3002C4_MGX	0	9	0	IBD	Schirmir_2018
M00554	C3002C4_MGX	0	9	0	IBD	Schirmir_2018
M00555	C3002C4_MGX	0	9	0	IBD	Schirmir_2018
M00563	C3002C4_MGX	0	9	0	IBD	Schirmir_2018
M00565	C3002C4_MGX	0	9	0	IBD	Schirmir_2018
M00567	C3002C4_MGX	0	9	0	IBD	Schirmir_2018
M00568	C3002C4_MGX	0	9	0	IBD	Schirmir_2018
M00569	C3002C4_MGX	0	9	0	IBD	Schirmir_2018
M00570	C3002C4_MGX	4	9	0.444444	IBD	Schirmir_2018
M00572	C3002C4_MGX	5	9	0.555556	IBD	Schirmir_2018
M00577	C3002C4_MGX	1	9	0.111111	IBD	Schirmir_2018
M00579	C3002C4_MGX	5	9	0.555556	IBD	Schirmir_2018
M00580	C3002C4_MGX	0	9	0	IBD	Schirmir_2018
M00595	C3002C4_MGX	0	9	0	IBD	Schirmir_2018
M00596	C3002C4_MGX	0	9	0	IBD	Schirmir_2018
M00608	C3002C4_MGX	0	9	0	IBD	Schirmir_2018
M00616	C3002C4_MGX	0	9	0	IBD	Schirmir_2018
M00617	C3002C4_MGX	0	9	0	IBD	Schirmir_2018
M00620	C3002C4_MGX	0	9	0	IBD	Schirmir_2018
M00622	C3002C4_MGX	0	9	0	IBD	Schirmir_2018
M00627	C3002C4_MGX	6	9	0.666667	IBD	Schirmir_2018
M00631	C3002C4_MGX	8	9	0.888889	IBD	Schirmir_2018
M00632	C3002C4_MGX	0	9	0	IBD	Schirmir_2018
M00637	C3002C4_MGX	0	9	0	IBD	Schirmir_2018
M00641	C3002C4_MGX	0	9	0	IBD	Schirmir_2018
M00642	C3002C4_MGX	0	9	0	IBD	Schirmir_2018
M00649	C3002C4_MGX	0	9	0	IBD	Schirmir_2018
M00651	C3002C4_MGX	4	9	0.444444	IBD	Schirmir_2018
M00652	C3002C4_MGX	0	9	0	IBD	Schirmir_2018
M00696	C3002C4_MGX	0	9	0	IBD	Schirmir_2018
M00697	C3002C4_MGX	0	9	0	IBD	Schirmir_2018
M00698	C3002C4_MGX	0	9	0	IBD	Schirmir_2018
M00700	C3002C4_MGX	0	9	0	IBD	Schirmir_2018
M00702	C3002C4_MGX	0	9	0	IBD	Schirmir_2018
M00705	C3002C4_MGX	4	9	0.444444	IBD	Schirmir_2018
M00725	C3002C4_MGX	0	9	0	IBD	Schirmir_2018
M00741	C3002C4_MGX	6	9	0.666667	IBD	Schirmir_2018
M00745	C3002C4_MGX	0	9	0	IBD	Schirmir_2018
M00761	C3002C4_MGX	0	9	0	IBD	Schirmir_2018
M00793	C3002C4_MGX	10	9	1.11111	IBD	Schirmir_2018
M00844	C3002C4_MGX	3	9	0.333333	IBD	Schirmir_2018
M00846	C3002C4_MGX	2	9	0.222222	IBD	Schirmir_2018
M00847	C3002C4_MGX	0	9	0	IBD	Schirmir_2018
M00854	C3002C4_MGX	10	9	1.11111	IBD	Schirmir_2018
M00855	C3002C4_MGX	6	9	0.666667	IBD	Schirmir_2018
M00866	C3002C4_MGX	0	9	0	IBD	Schirmir_2018
M00877	C3002C4_MGX	0	9	0	IBD	Schirmir_2018
M00878	C3002C4_MGX	0	9	0	IBD	Schirmir_2018
M00879	C3002C4_MGX	0	9	0	IBD	Schirmir_2018
M00880	C3002C4_MGX	1	9	0.111111	IBD	Schirmir_2018
M00881	C3002C4_MGX	4	9	0.444444	IBD	Schirmir_2018
M00882	C3002C4_MGX	0	9	0	IBD	Schirmir_2018
M00883	C3002C4_MGX	0	9	0	IBD	Schirmir_2018
M00895	C3002C4_MGX	0	9	0	IBD	Schirmir_2018
M00896	C3002C4_MGX	0	9	0	IBD	Schirmir_2018
M00899	C3002C4_MGX	6	9	0.666667	IBD	Schirmir_2018
M00909	C3002C4_MGX	3	9	0.333333	IBD	Schirmir_2018
M00914	C3002C4_MGX	0	9	0	IBD	Schirmir_2018
M00916	C3002C4_MGX	1	9	0.111111	IBD	Schirmir_2018
M00918	C3002C4_MGX	0	9	0	IBD	Schirmir_2018
M00922	C3002C4_MGX	0	9	0	IBD	Schirmir_2018
M00923	C3002C4_MGX	0	9	0	IBD	Schirmir_2018
M00924	C3002C4_MGX	2	9	0.222222	IBD	Schirmir_2018
M00925	C3002C4_MGX	0	9	0	IBD	Schirmir_2018
M00926	C3002C4_MGX	0	9	0	IBD	Schirmir_2018
M00930	C3002C4_MGX	0	9	0	IBD	Schirmir_2018
M00931	C3002C4_MGX	0	9	0	IBD	Schirmir_2018
M00935	C3002C4_MGX	0	9	0	IBD	Schirmir_2018
M00001	C3013C2_MGX	9	10	0.9	IBD	Schirmir_2018
M00002	C3013C2_MGX	9	10	0.9	IBD	Schirmir_2018
M00003	C3013C2_MGX	8	10	0.8	IBD	Schirmir_2018
M00004	C3013C2_MGX	1	10	0.1	IBD	Schirmir_2018
M00005	C3013C2_MGX	9	10	0.9	IBD	Schirmir_2018
M00006	C3013C2_MGX	1	10	0.1	IBD	Schirmir_2018
M00007	C3013C2_MGX	4	10	0.4	IBD	Schirmir_2018
M00008	C3013C2_MGX	0	10	0	IBD	Schirmir_2018
M00009	C3013C2_MGX	1	10	0.1	IBD	Schirmir_2018
M00010	C3013C2_MGX	1	10	0.1	IBD	Schirmir_2018
M00011	C3013C2_MGX	6	10	0.6	IBD	Schirmir_2018
M00012	C3013C2_MGX	0	10	0	IBD	Schirmir_2018
M00015	C3013C2_MGX	6	10	0.6	IBD	Schirmir_2018
M00016	C3013C2_MGX	0	10	0	IBD	Schirmir_2018
M00017	C3013C2_MGX	1	10	0.1	IBD	Schirmir_2018
M00018	C3013C2_MGX	3	10	0.3	IBD	Schirmir_2018
M00019	C3013C2_MGX	6	10	0.6	IBD	Schirmir_2018
M00020	C3013C2_MGX	5	10	0.5	IBD	Schirmir_2018
M00021	C3013C2_MGX	9	10	0.9	IBD	Schirmir_2018
M00022	C3013C2_MGX	7	10	0.7	IBD	Schirmir_2018
M00023	C3013C2_MGX	7	10	0.7	IBD	Schirmir_2018
M00024	C3013C2_MGX	0	10	0	IBD	Schirmir_2018
M00025	C3013C2_MGX	0	10	0	IBD	Schirmir_2018
M00026	C3013C2_MGX	5	10	0.5	IBD	Schirmir_2018
M00027	C3013C2_MGX	0	10	0	IBD	Schirmir_2018
M00028	C3013C2_MGX	9	10	0.9	IBD	Schirmir_2018
M00034	C3013C2_MGX	0	10	0	IBD	Schirmir_2018
M00035	C3013C2_MGX	0	10	0	IBD	Schirmir_2018
M00036	C3013C2_MGX	0	10	0	IBD	Schirmir_2018
M00040	C3013C2_MGX	0	10	0	IBD	Schirmir_2018
M00044	C3013C2_MGX	0	10	0	IBD	Schirmir_2018
M00045	C3013C2_MGX	3	10	0.3	IBD	Schirmir_2018
M00046	C3013C2_MGX	0	10	0	IBD	Schirmir_2018
M00048	C3013C2_MGX	8	10	0.8	IBD	Schirmir_2018
M00049	C3013C2_MGX	11	10	1.1	IBD	Schirmir_2018
M00050	C3013C2_MGX	7	10	0.7	IBD	Schirmir_2018
M00051	C3013C2_MGX	9	10	0.9	IBD	Schirmir_2018
M00052	C3013C2_MGX	6	10	0.6	IBD	Schirmir_2018
M00053	C3013C2_MGX	1	10	0.1	IBD	Schirmir_2018
M00060	C3013C2_MGX	0	10	0	IBD	Schirmir_2018
M00061	C3013C2_MGX	0	10	0	IBD	Schirmir_2018
M00063	C3013C2_MGX	6	10	0.6	IBD	Schirmir_2018
M00064	C3013C2_MGX	1	10	0.1	IBD	Schirmir_2018
M00082	C3013C2_MGX	2	10	0.2	IBD	Schirmir_2018
M00083	C3013C2_MGX	13	10	1.3	IBD	Schirmir_2018
M00086	C3013C2_MGX	10	10	1	IBD	Schirmir_2018
M00087	C3013C2_MGX	0	10	0	IBD	Schirmir_2018
M00088	C3013C2_MGX	0	10	0	IBD	Schirmir_2018
M00091	C3013C2_MGX	0	10	0	IBD	Schirmir_2018
M00093	C3013C2_MGX	7	10	0.7	IBD	Schirmir_2018
M00095	C3013C2_MGX	0	10	0	IBD	Schirmir_2018
M00096	C3013C2_MGX	6	10	0.6	IBD	Schirmir_2018
M00098	C3013C2_MGX	1	10	0.1	IBD	Schirmir_2018
M00115	C3013C2_MGX	6	10	0.6	IBD	Schirmir_2018
M00116	C3013C2_MGX	0	10	0	IBD	Schirmir_2018
M00117	C3013C2_MGX	0	10	0	IBD	Schirmir_2018
M00118	C3013C2_MGX	0	10	0	IBD	Schirmir_2018
M00119	C3013C2_MGX	6	10	0.6	IBD	Schirmir_2018
M00120	C3013C2_MGX	6	10	0.6	IBD	Schirmir_2018
M00121	C3013C2_MGX	0	10	0	IBD	Schirmir_2018
M00122	C3013C2_MGX	6	10	0.6	IBD	Schirmir_2018
M00123	C3013C2_MGX	3	10	0.3	IBD	Schirmir_2018
M00124	C3013C2_MGX	0	10	0	IBD	Schirmir_2018
M00125	C3013C2_MGX	7	10	0.7	IBD	Schirmir_2018
M00126	C3013C2_MGX	5	10	0.5	IBD	Schirmir_2018
M00127	C3013C2_MGX	4	10	0.4	IBD	Schirmir_2018
M00133	C3013C2_MGX	2	10	0.2	IBD	Schirmir_2018
M00134	C3013C2_MGX	0	10	0	IBD	Schirmir_2018
M00136	C3013C2_MGX	0	10	0	IBD	Schirmir_2018
M00140	C3013C2_MGX	8	10	0.8	IBD	Schirmir_2018
M00142	C3013C2_MGX	0	10	0	IBD	Schirmir_2018
M00144	C3013C2_MGX	4	10	0.4	IBD	Schirmir_2018
M00145	C3013C2_MGX	0	10	0	IBD	Schirmir_2018
M00149	C3013C2_MGX	0	10	0	IBD	Schirmir_2018
M00150	C3013C2_MGX	0	10	0	IBD	Schirmir_2018
M00151	C3013C2_MGX	0	10	0	IBD	Schirmir_2018
M00153	C3013C2_MGX	0	10	0	IBD	Schirmir_2018
M00155	C3013C2_MGX	0	10	0	IBD	Schirmir_2018
M00156	C3013C2_MGX	0	10	0	IBD	Schirmir_2018
M00157	C3013C2_MGX	11	10	1.1	IBD	Schirmir_2018
M00159	C3013C2_MGX	1	10	0.1	IBD	Schirmir_2018
M00161	C3013C2_MGX	0	10	0	IBD	Schirmir_2018
M00166	C3013C2_MGX	0	10	0	IBD	Schirmir_2018
M00168	C3013C2_MGX	0	10	0	IBD	Schirmir_2018
M00169	C3013C2_MGX	2	10	0.2	IBD	Schirmir_2018
M00175	C3013C2_MGX	0	10	0	IBD	Schirmir_2018
M00176	C3013C2_MGX	1	10	0.1	IBD	Schirmir_2018
M00307	C3013C2_MGX	11	10	1.1	IBD	Schirmir_2018
M00308	C3013C2_MGX	0	10	0	IBD	Schirmir_2018
M00338	C3013C2_MGX	0	10	0	IBD	Schirmir_2018
M00345	C3013C2_MGX	0	10	0	IBD	Schirmir_2018
M00356	C3013C2_MGX	0	10	0	IBD	Schirmir_2018
M00357	C3013C2_MGX	0	10	0	IBD	Schirmir_2018
M00358	C3013C2_MGX	0	10	0	IBD	Schirmir_2018
M00363	C3013C2_MGX	0	10	0	IBD	Schirmir_2018
M00364	C3013C2_MGX	2	10	0.2	IBD	Schirmir_2018
M00365	C3013C2_MGX	1	10	0.1	IBD	Schirmir_2018
M00417	C3013C2_MGX	0	10	0	IBD	Schirmir_2018
M00432	C3013C2_MGX	9	10	0.9	IBD	Schirmir_2018
M00525	C3013C2_MGX	0	10	0	IBD	Schirmir_2018
M00526	C3013C2_MGX	7	10	0.7	IBD	Schirmir_2018
M00527	C3013C2_MGX	7	10	0.7	IBD	Schirmir_2018
M00529	C3013C2_MGX	0	10	0	IBD	Schirmir_2018
M00530	C3013C2_MGX	0	10	0	IBD	Schirmir_2018
M00533	C3013C2_MGX	0	10	0	IBD	Schirmir_2018
M00535	C3013C2_MGX	4	10	0.4	IBD	Schirmir_2018
M00545	C3013C2_MGX	0	10	0	IBD	Schirmir_2018
M00546	C3013C2_MGX	0	10	0	IBD	Schirmir_2018
M00549	C3013C2_MGX	3	10	0.3	IBD	Schirmir_2018
M00550	C3013C2_MGX	0	10	0	IBD	Schirmir_2018
M00551	C3013C2_MGX	0	10	0	IBD	Schirmir_2018
M00552	C3013C2_MGX	0	10	0	IBD	Schirmir_2018
M00554	C3013C2_MGX	0	10	0	IBD	Schirmir_2018
M00555	C3013C2_MGX	0	10	0	IBD	Schirmir_2018
M00563	C3013C2_MGX	0	10	0	IBD	Schirmir_2018
M00565	C3013C2_MGX	0	10	0	IBD	Schirmir_2018
M00567	C3013C2_MGX	0	10	0	IBD	Schirmir_2018
M00568	C3013C2_MGX	0	10	0	IBD	Schirmir_2018
M00569	C3013C2_MGX	0	10	0	IBD	Schirmir_2018
M00570	C3013C2_MGX	5	10	0.5	IBD	Schirmir_2018
M00572	C3013C2_MGX	2	10	0.2	IBD	Schirmir_2018
M00577	C3013C2_MGX	1	10	0.1	IBD	Schirmir_2018
M00579	C3013C2_MGX	2	10	0.2	IBD	Schirmir_2018
M00580	C3013C2_MGX	0	10	0	IBD	Schirmir_2018
M00595	C3013C2_MGX	0	10	0	IBD	Schirmir_2018
M00596	C3013C2_MGX	0	10	0	IBD	Schirmir_2018
M00608	C3013C2_MGX	0	10	0	IBD	Schirmir_2018
M00616	C3013C2_MGX	0	10	0	IBD	Schirmir_2018
M00617	C3013C2_MGX	0	10	0	IBD	Schirmir_2018
M00620	C3013C2_MGX	0	10	0	IBD	Schirmir_2018
M00622	C3013C2_MGX	0	10	0	IBD	Schirmir_2018
M00627	C3013C2_MGX	4	10	0.4	IBD	Schirmir_2018
M00631	C3013C2_MGX	4	10	0.4	IBD	Schirmir_2018
M00632	C3013C2_MGX	0	10	0	IBD	Schirmir_2018
M00637	C3013C2_MGX	0	10	0	IBD	Schirmir_2018
M00641	C3013C2_MGX	0	10	0	IBD	Schirmir_2018
M00642	C3013C2_MGX	0	10	0	IBD	Schirmir_2018
M00649	C3013C2_MGX	0	10	0	IBD	Schirmir_2018
M00651	C3013C2_MGX	4	10	0.4	IBD	Schirmir_2018
M00652	C3013C2_MGX	0	10	0	IBD	Schirmir_2018
M00696	C3013C2_MGX	0	10	0	IBD	Schirmir_2018
M00697	C3013C2_MGX	0	10	0	IBD	Schirmir_2018
M00698	C3013C2_MGX	0	10	0	IBD	Schirmir_2018
M00700	C3013C2_MGX	0	10	0	IBD	Schirmir_2018
M00702	C3013C2_MGX	0	10	0	IBD	Schirmir_2018
M00705	C3013C2_MGX	4	10	0.4	IBD	Schirmir_2018
M00725	C3013C2_MGX	0	10	0	IBD	Schirmir_2018
M00741	C3013C2_MGX	4	10	0.4	IBD	Schirmir_2018
M00745	C3013C2_MGX	0	10	0	IBD	Schirmir_2018
M00761	C3013C2_MGX	0	10	0	IBD	Schirmir_2018
M00793	C3013C2_MGX	12	10	1.2	IBD	Schirmir_2018
M00844	C3013C2_MGX	6	10	0.6	IBD	Schirmir_2018
M00846	C3013C2_MGX	3	10	0.3	IBD	Schirmir_2018
M00847	C3013C2_MGX	0	10	0	IBD	Schirmir_2018
M00854	C3013C2_MGX	10	10	1	IBD	Schirmir_2018
M00855	C3013C2_MGX	5	10	0.5	IBD	Schirmir_2018
M00866	C3013C2_MGX	1	10	0.1	IBD	Schirmir_2018
M00877	C3013C2_MGX	0	10	0	IBD	Schirmir_2018
M00878	C3013C2_MGX	0	10	0	IBD	Schirmir_2018
M00879	C3013C2_MGX	0	10	0	IBD	Schirmir_2018
M00880	C3013C2_MGX	0	10	0	IBD	Schirmir_2018
M00881	C3013C2_MGX	3	10	0.3	IBD	Schirmir_2018
M00882	C3013C2_MGX	0	10	0	IBD	Schirmir_2018
M00883	C3013C2_MGX	0	10	0	IBD	Schirmir_2018
M00895	C3013C2_MGX	0	10	0	IBD	Schirmir_2018
M00896	C3013C2_MGX	0	10	0	IBD	Schirmir_2018
M00899	C3013C2_MGX	5	10	0.5	IBD	Schirmir_2018
M00909	C3013C2_MGX	3	10	0.3	IBD	Schirmir_2018
M00914	C3013C2_MGX	0	10	0	IBD	Schirmir_2018
M00916	C3013C2_MGX	4	10	0.4	IBD	Schirmir_2018
M00918	C3013C2_MGX	0	10	0	IBD	Schirmir_2018
M00922	C3013C2_MGX	0	10	0	IBD	Schirmir_2018
M00923	C3013C2_MGX	0	10	0	IBD	Schirmir_2018
M00924	C3013C2_MGX	4	10	0.4	IBD	Schirmir_2018
M00925	C3013C2_MGX	0	10	0	IBD	Schirmir_2018
M00926	C3013C2_MGX	0	10	0	IBD	Schirmir_2018
M00930	C3013C2_MGX	0	10	0	IBD	Schirmir_2018
M00931	C3013C2_MGX	0	10	0	IBD	Schirmir_2018
M00935	C3013C2_MGX	0	10	0	IBD	Schirmir_2018
M00001	M2008C11_MGX	9	11	0.818182	IBD	Schirmir_2018
M00002	M2008C11_MGX	9	11	0.818182	IBD	Schirmir_2018
M00003	M2008C11_MGX	9	11	0.818182	IBD	Schirmir_2018
M00004	M2008C11_MGX	6	11	0.545455	IBD	Schirmir_2018
M00005	M2008C11_MGX	10	11	0.909091	IBD	Schirmir_2018
M00006	M2008C11_MGX	6	11	0.545455	IBD	Schirmir_2018
M00007	M2008C11_MGX	11	11	1	IBD	Schirmir_2018
M00008	M2008C11_MGX	0	11	0	IBD	Schirmir_2018
M00009	M2008C11_MGX	0	11	0	IBD	Schirmir_2018
M00010	M2008C11_MGX	0	11	0	IBD	Schirmir_2018
M00011	M2008C11_MGX	3	11	0.272727	IBD	Schirmir_2018
M00012	M2008C11_MGX	0	11	0	IBD	Schirmir_2018
M00015	M2008C11_MGX	10	11	0.909091	IBD	Schirmir_2018
M00016	M2008C11_MGX	1	11	0.0909091	IBD	Schirmir_2018
M00017	M2008C11_MGX	0	11	0	IBD	Schirmir_2018
M00018	M2008C11_MGX	2	11	0.181818	IBD	Schirmir_2018
M00019	M2008C11_MGX	9	11	0.818182	IBD	Schirmir_2018
M00020	M2008C11_MGX	10	11	0.909091	IBD	Schirmir_2018
M00021	M2008C11_MGX	14	11	1.27273	IBD	Schirmir_2018
M00022	M2008C11_MGX	5	11	0.454545	IBD	Schirmir_2018
M00023	M2008C11_MGX	6	11	0.545455	IBD	Schirmir_2018
M00024	M2008C11_MGX	0	11	0	IBD	Schirmir_2018
M00025	M2008C11_MGX	0	11	0	IBD	Schirmir_2018
M00026	M2008C11_MGX	7	11	0.636364	IBD	Schirmir_2018
M00027	M2008C11_MGX	0	11	0	IBD	Schirmir_2018
M00028	M2008C11_MGX	4	11	0.363636	IBD	Schirmir_2018
M00034	M2008C11_MGX	0	11	0	IBD	Schirmir_2018
M00035	M2008C11_MGX	0	11	0	IBD	Schirmir_2018
M00036	M2008C11_MGX	0	11	0	IBD	Schirmir_2018
M00040	M2008C11_MGX	0	11	0	IBD	Schirmir_2018
M00044	M2008C11_MGX	0	11	0	IBD	Schirmir_2018
M00045	M2008C11_MGX	7	11	0.636364	IBD	Schirmir_2018
M00046	M2008C11_MGX	1	11	0.0909091	IBD	Schirmir_2018
M00048	M2008C11_MGX	9	11	0.818182	IBD	Schirmir_2018
M00049	M2008C11_MGX	10	11	0.909091	IBD	Schirmir_2018
M00050	M2008C11_MGX	12	11	1.09091	IBD	Schirmir_2018
M00051	M2008C11_MGX	8	11	0.727273	IBD	Schirmir_2018
M00052	M2008C11_MGX	5	11	0.454545	IBD	Schirmir_2018
M00053	M2008C11_MGX	0	11	0	IBD	Schirmir_2018
M00060	M2008C11_MGX	0	11	0	IBD	Schirmir_2018
M00061	M2008C11_MGX	0	11	0	IBD	Schirmir_2018
M00063	M2008C11_MGX	7	11	0.636364	IBD	Schirmir_2018
M00064	M2008C11_MGX	0	11	0	IBD	Schirmir_2018
M00082	M2008C11_MGX	1	11	0.0909091	IBD	Schirmir_2018
M00083	M2008C11_MGX	18	11	1.63636	IBD	Schirmir_2018
M00086	M2008C11_MGX	30	11	2.72727	IBD	Schirmir_2018
M00087	M2008C11_MGX	0	11	0	IBD	Schirmir_2018
M00088	M2008C11_MGX	0	11	0	IBD	Schirmir_2018
M00091	M2008C11_MGX	0	11	0	IBD	Schirmir_2018
M00093	M2008C11_MGX	9	11	0.818182	IBD	Schirmir_2018
M00095	M2008C11_MGX	0	11	0	IBD	Schirmir_2018
M00096	M2008C11_MGX	6	11	0.545455	IBD	Schirmir_2018
M00098	M2008C11_MGX	1	11	0.0909091	IBD	Schirmir_2018
M00115	M2008C11_MGX	8	11	0.727273	IBD	Schirmir_2018
M00116	M2008C11_MGX	0	11	0	IBD	Schirmir_2018
M00117	M2008C11_MGX	0	11	0	IBD	Schirmir_2018
M00118	M2008C11_MGX	0	11	0	IBD	Schirmir_2018
M00119	M2008C11_MGX	7	11	0.636364	IBD	Schirmir_2018
M00120	M2008C11_MGX	8	11	0.727273	IBD	Schirmir_2018
M00121	M2008C11_MGX	0	11	0	IBD	Schirmir_2018
M00122	M2008C11_MGX	6	11	0.545455	IBD	Schirmir_2018
M00123	M2008C11_MGX	7	11	0.636364	IBD	Schirmir_2018
M00124	M2008C11_MGX	0	11	0	IBD	Schirmir_2018
M00125	M2008C11_MGX	9	11	0.818182	IBD	Schirmir_2018
M00126	M2008C11_MGX	8	11	0.727273	IBD	Schirmir_2018
M00127	M2008C11_MGX	3	11	0.272727	IBD	Schirmir_2018
M00133	M2008C11_MGX	1	11	0.0909091	IBD	Schirmir_2018
M00134	M2008C11_MGX	0	11	0	IBD	Schirmir_2018
M00136	M2008C11_MGX	0	11	0	IBD	Schirmir_2018
M00140	M2008C11_MGX	11	11	1	IBD	Schirmir_2018
M00142	M2008C11_MGX	0	11	0	IBD	Schirmir_2018
M00144	M2008C11_MGX	10	11	0.909091	IBD	Schirmir_2018
M00145	M2008C11_MGX	0	11	0	IBD	Schirmir_2018
M00149	M2008C11_MGX	0	11	0	IBD	Schirmir_2018
M00150	M2008C11_MGX	0	11	0	IBD	Schirmir_2018
M00151	M2008C11_MGX	0	11	0	IBD	Schirmir_2018
M00153	M2008C11_MGX	0	11	0	IBD	Schirmir_2018
M00155	M2008C11_MGX	0	11	0	IBD	Schirmir_2018
M00156	M2008C11_MGX	0	11	0	IBD	Schirmir_2018
M00157	M2008C11_MGX	9	11	0.818182	IBD	Schirmir_2018
M00159	M2008C11_MGX	8	11	0.727273	IBD	Schirmir_2018
M00161	M2008C11_MGX	0	11	0	IBD	Schirmir_2018
M00166	M2008C11_MGX	0	11	0	IBD	Schirmir_2018
M00168	M2008C11_MGX	0	11	0	IBD	Schirmir_2018
M00169	M2008C11_MGX	7	11	0.636364	IBD	Schirmir_2018
M00175	M2008C11_MGX	0	11	0	IBD	Schirmir_2018
M00176	M2008C11_MGX	0	11	0	IBD	Schirmir_2018
M00307	M2008C11_MGX	18	11	1.63636	IBD	Schirmir_2018
M00308	M2008C11_MGX	0	11	0	IBD	Schirmir_2018
M00338	M2008C11_MGX	0	11	0	IBD	Schirmir_2018
M00345	M2008C11_MGX	0	11	0	IBD	Schirmir_2018
M00356	M2008C11_MGX	0	11	0	IBD	Schirmir_2018
M00357	M2008C11_MGX	0	11	0	IBD	Schirmir_2018
M00358	M2008C11_MGX	0	11	0	IBD	Schirmir_2018
M00363	M2008C11_MGX	0	11	0	IBD	Schirmir_2018
M00364	M2008C11_MGX	3	11	0.272727	IBD	Schirmir_2018
M00365	M2008C11_MGX	3	11	0.272727	IBD	Schirmir_2018
M00417	M2008C11_MGX	0	11	0	IBD	Schirmir_2018
M00432	M2008C11_MGX	9	11	0.818182	IBD	Schirmir_2018
M00525	M2008C11_MGX	0	11	0	IBD	Schirmir_2018
M00526	M2008C11_MGX	6	11	0.545455	IBD	Schirmir_2018
M00527	M2008C11_MGX	9	11	0.818182	IBD	Schirmir_2018
M00529	M2008C11_MGX	0	11	0	IBD	Schirmir_2018
M00530	M2008C11_MGX	0	11	0	IBD	Schirmir_2018
M00533	M2008C11_MGX	0	11	0	IBD	Schirmir_2018
M00535	M2008C11_MGX	8	11	0.727273	IBD	Schirmir_2018
M00545	M2008C11_MGX	0	11	0	IBD	Schirmir_2018
M00546	M2008C11_MGX	0	11	0	IBD	Schirmir_2018
M00549	M2008C11_MGX	2	11	0.181818	IBD	Schirmir_2018
M00550	M2008C11_MGX	0	11	0	IBD	Schirmir_2018
M00551	M2008C11_MGX	0	11	0	IBD	Schirmir_2018
M00552	M2008C11_MGX	0	11	0	IBD	Schirmir_2018
M00554	M2008C11_MGX	0	11	0	IBD	Schirmir_2018
M00555	M2008C11_MGX	0	11	0	IBD	Schirmir_2018
M00563	M2008C11_MGX	0	11	0	IBD	Schirmir_2018
M00565	M2008C11_MGX	0	11	0	IBD	Schirmir_2018
M00567	M2008C11_MGX	0	11	0	IBD	Schirmir_2018
M00568	M2008C11_MGX	0	11	0	IBD	Schirmir_2018
M00569	M2008C11_MGX	0	11	0	IBD	Schirmir_2018
M00570	M2008C11_MGX	5	11	0.454545	IBD	Schirmir_2018
M00572	M2008C11_MGX	6	11	0.545455	IBD	Schirmir_2018
M00577	M2008C11_MGX	0	11	0	IBD	Schirmir_2018
M00579	M2008C11_MGX	2	11	0.181818	IBD	Schirmir_2018
M00580	M2008C11_MGX	0	11	0	IBD	Schirmir_2018
M00595	M2008C11_MGX	0	11	0	IBD	Schirmir_2018
M00596	M2008C11_MGX	0	11	0	IBD	Schirmir_2018
M00608	M2008C11_MGX	0	11	0	IBD	Schirmir_2018
M00616	M2008C11_MGX	0	11	0	IBD	Schirmir_2018
M00617	M2008C11_MGX	0	11	0	IBD	Schirmir_2018
M00620	M2008C11_MGX	0	11	0	IBD	Schirmir_2018
M00622	M2008C11_MGX	0	11	0	IBD	Schirmir_2018
M00627	M2008C11_MGX	11	11	1	IBD	Schirmir_2018
M00631	M2008C11_MGX	5	11	0.454545	IBD	Schirmir_2018
M00632	M2008C11_MGX	0	11	0	IBD	Schirmir_2018
M00637	M2008C11_MGX	0	11	0	IBD	Schirmir_2018
M00641	M2008C11_MGX	0	11	0	IBD	Schirmir_2018
M00642	M2008C11_MGX	0	11	0	IBD	Schirmir_2018
M00649	M2008C11_MGX	0	11	0	IBD	Schirmir_2018
M00651	M2008C11_MGX	4	11	0.363636	IBD	Schirmir_2018
M00652	M2008C11_MGX	0	11	0	IBD	Schirmir_2018
M00696	M2008C11_MGX	0	11	0	IBD	Schirmir_2018
M00697	M2008C11_MGX	0	11	0	IBD	Schirmir_2018
M00698	M2008C11_MGX	0	11	0	IBD	Schirmir_2018
M00700	M2008C11_MGX	0	11	0	IBD	Schirmir_2018
M00702	M2008C11_MGX	0	11	0	IBD	Schirmir_2018
M00705	M2008C11_MGX	2	11	0.181818	IBD	Schirmir_2018
M00725	M2008C11_MGX	0	11	0	IBD	Schirmir_2018
M00741	M2008C11_MGX	7	11	0.636364	IBD	Schirmir_2018
M00745	M2008C11_MGX	0	11	0	IBD	Schirmir_2018
M00761	M2008C11_MGX	0	11	0	IBD	Schirmir_2018
M00793	M2008C11_MGX	14	11	1.27273	IBD	Schirmir_2018
M00844	M2008C11_MGX	4	11	0.363636	IBD	Schirmir_2018
M00846	M2008C11_MGX	0	11	0	IBD	Schirmir_2018
M00847	M2008C11_MGX	0	11	0	IBD	Schirmir_2018
M00854	M2008C11_MGX	8	11	0.727273	IBD	Schirmir_2018
M00855	M2008C11_MGX	8	11	0.727273	IBD	Schirmir_2018
M00866	M2008C11_MGX	0	11	0	IBD	Schirmir_2018
M00877	M2008C11_MGX	0	11	0	IBD	Schirmir_2018
M00878	M2008C11_MGX	0	11	0	IBD	Schirmir_2018
M00879	M2008C11_MGX	0	11	0	IBD	Schirmir_2018
M00880	M2008C11_MGX	0	11	0	IBD	Schirmir_2018
M00881	M2008C11_MGX	7	11	0.636364	IBD	Schirmir_2018
M00882	M2008C11_MGX	0	11	0	IBD	Schirmir_2018
M00883	M2008C11_MGX	0	11	0	IBD	Schirmir_2018
M00895	M2008C11_MGX	0	11	0	IBD	Schirmir_2018
M00896	M2008C11_MGX	3	11	0.272727	IBD	Schirmir_2018
M00899	M2008C11_MGX	2	11	0.181818	IBD	Schirmir_2018
M00909	M2008C11_MGX	2	11	0.181818	IBD	Schirmir_2018
M00914	M2008C11_MGX	0	11	0	IBD	Schirmir_2018
M00916	M2008C11_MGX	1	11	0.0909091	IBD	Schirmir_2018
M00918	M2008C11_MGX	0	11	0	IBD	Schirmir_2018
M00922	M2008C11_MGX	0	11	0	IBD	Schirmir_2018
M00923	M2008C11_MGX	0	11	0	IBD	Schirmir_2018
M00924	M2008C11_MGX	0	11	0	IBD	Schirmir_2018
M00925	M2008C11_MGX	0	11	0	IBD	Schirmir_2018
M00926	M2008C11_MGX	0	11	0	IBD	Schirmir_2018
M00930	M2008C11_MGX	1	11	0.0909091	IBD	Schirmir_2018
M00931	M2008C11_MGX	0	11	0	IBD	Schirmir_2018
M00935	M2008C11_MGX	0	11	0	IBD	Schirmir_2018
M00001	P6009C1_MGX	12	14	0.857143	IBD	Schirmir_2018
M00002	P6009C1_MGX	12	14	0.857143	IBD	Schirmir_2018
M00003	P6009C1_MGX	12	14	0.857143	IBD	Schirmir_2018
M00004	P6009C1_MGX	8	14	0.571429	IBD	Schirmir_2018
M00005	P6009C1_MGX	20	14	1.42857	IBD	Schirmir_2018
M00006	P6009C1_MGX	8	14	0.571429	IBD	Schirmir_2018
M00007	P6009C1_MGX	12	14	0.857143	IBD	Schirmir_2018
M00008	P6009C1_MGX	0	14	0	IBD	Schirmir_2018
M00009	P6009C1_MGX	0	14	0	IBD	Schirmir_2018
M00010	P6009C1_MGX	0	14	0	IBD	Schirmir_2018
M00011	P6009C1_MGX	3	14	0.214286	IBD	Schirmir_2018
M00012	P6009C1_MGX	0	14	0	IBD	Schirmir_2018
M00015	P6009C1_MGX	17	14	1.21429	IBD	Schirmir_2018
M00016	P6009C1_MGX	1	14	0.0714286	IBD	Schirmir_2018
M00017	P6009C1_MGX	2	14	0.142857	IBD	Schirmir_2018
M00018	P6009C1_MGX	10	14	0.714286	IBD	Schirmir_2018
M00019	P6009C1_MGX	17	14	1.21429	IBD	Schirmir_2018
M00020	P6009C1_MGX	15	14	1.07143	IBD	Schirmir_2018
M00021	P6009C1_MGX	20	14	1.42857	IBD	Schirmir_2018
M00022	P6009C1_MGX	12	14	0.857143	IBD	Schirmir_2018
M00023	P6009C1_MGX	11	14	0.785714	IBD	Schirmir_2018
M00024	P6009C1_MGX	0	14	0	IBD	Schirmir_2018
M00025	P6009C1_MGX	0	14	0	IBD	Schirmir_2018
M00026	P6009C1_MGX	15	14	1.07143	IBD	Schirmir_2018
M00027	P6009C1_MGX	0	14	0	IBD	Schirmir_2018
M00028	P6009C1_MGX	12	14	0.857143	IBD	Schirmir_2018
M00034	P6009C1_MGX	0	14	0	IBD	Schirmir_2018
M00035	P6009C1_MGX	0	14	0	IBD	Schirmir_2018
M00036	P6009C1_MGX	0	14	0	IBD	Schirmir_2018
M00040	P6009C1_MGX	0	14	0	IBD	Schirmir_2018
M00044	P6009C1_MGX	0	14	0	IBD	Schirmir_2018
M00045	P6009C1_MGX	8	14	0.571429	IBD	Schirmir_2018
M00046	P6009C1_MGX	0	14	0	IBD	Schirmir_2018
M00048	P6009C1_MGX	20	14	1.42857	IBD	Schirmir_2018
M00049	P6009C1_MGX	19	14	1.35714	IBD	Schirmir_2018
M00050	P6009C1_MGX	17	14	1.21429	IBD	Schirmir_2018
M00051	P6009C1_MGX	20	14	1.42857	IBD	Schirmir_2018
M00052	P6009C1_MGX	7	14	0.5	IBD	Schirmir_2018
M00053	P6009C1_MGX	1	14	0.0714286	IBD	Schirmir_2018
M00060	P6009C1_MGX	0	14	0	IBD	Schirmir_2018
M00061	P6009C1_MGX	1	14	0.0714286	IBD	Schirmir_2018
M00063	P6009C1_MGX	11	14	0.785714	IBD	Schirmir_2018
M00064	P6009C1_MGX	4	14	0.285714	IBD	Schirmir_2018
M00082	P6009C1_MGX	5	14	0.357143	IBD	Schirmir_2018
M00083	P6009C1_MGX	25	14	1.78571	IBD	Schirmir_2018
M00086	P6009C1_MGX	40	14	2.85714	IBD	Schirmir_2018
M00087	P6009C1_MGX	0	14	0	IBD	Schirmir_2018
M00088	P6009C1_MGX	0	14	0	IBD	Schirmir_2018
M00091	P6009C1_MGX	2	14	0.142857	IBD	Schirmir_2018
M00093	P6009C1_MGX	10	14	0.714286	IBD	Schirmir_2018
M00095	P6009C1_MGX	0	14	0	IBD	Schirmir_2018
M00096	P6009C1_MGX	12	14	0.857143	IBD	Schirmir_2018
M00098	P6009C1_MGX	0	14	0	IBD	Schirmir_2018
M00115	P6009C1_MGX	13	14	0.928571	IBD	Schirmir_2018
M00116	P6009C1_MGX	0	14	0	IBD	Schirmir_2018
M00117	P6009C1_MGX	0	14	0	IBD	Schirmir_2018
M00118	P6009C1_MGX	0	14	0	IBD	Schirmir_2018
M00119	P6009C1_MGX	13	14	0.928571	IBD	Schirmir_2018
M00120	P6009C1_MGX	16	14	1.14286	IBD	Schirmir_2018
M00121	P6009C1_MGX	1	14	0.0714286	IBD	Schirmir_2018
M00122	P6009C1_MGX	14	14	1	IBD	Schirmir_2018
M00123	P6009C1_MGX	11	14	0.785714	IBD	Schirmir_2018
M00124	P6009C1_MGX	0	14	0	IBD	Schirmir_2018
M00125	P6009C1_MGX	15	14	1.07143	IBD	Schirmir_2018
M00126	P6009C1_MGX	12	14	0.857143	IBD	Schirmir_2018
M00127	P6009C1_MGX	6	14	0.428571	IBD	Schirmir_2018
M00133	P6009C1_MGX	2	14	0.142857	IBD	Schirmir_2018
M00134	P6009C1_MGX	1	14	0.0714286	IBD	Schirmir_2018
M00136	P6009C1_MGX	0	14	0	IBD	Schirmir_2018
M00140	P6009C1_MGX	17	14	1.21429	IBD	Schirmir_2018
M00142	P6009C1_MGX	0	14	0	IBD	Schirmir_2018
M00144	P6009C1_MGX	11	14	0.785714	IBD	Schirmir_2018
M00145	P6009C1_MGX	0	14	0	IBD	Schirmir_2018
M00149	P6009C1_MGX	0	14	0	IBD	Schirmir_2018
M00150	P6009C1_MGX	0	14	0	IBD	Schirmir_2018
M00151	P6009C1_MGX	0	14	0	IBD	Schirmir_2018
M00153	P6009C1_MGX	0	14	0	IBD	Schirmir_2018
M00155	P6009C1_MGX	0	14	0	IBD	Schirmir_2018
M00156	P6009C1_MGX	0	14	0	IBD	Schirmir_2018
M00157	P6009C1_MGX	21	14	1.5	IBD	Schirmir_2018
M00159	P6009C1_MGX	1	14	0.0714286	IBD	Schirmir_2018
M00161	P6009C1_MGX	0	14	0	IBD	Schirmir_2018
M00166	P6009C1_MGX	0	14	0	IBD	Schirmir_2018
M00168	P6009C1_MGX	0	14	0	IBD	Schirmir_2018
M00169	P6009C1_MGX	9	14	0.642857	IBD	Schirmir_2018
M00175	P6009C1_MGX	0	14	0	IBD	Schirmir_2018
M00176	P6009C1_MGX	0	14	0	IBD	Schirmir_2018
M00307	P6009C1_MGX	30	14	2.14286	IBD	Schirmir_2018
M00308	P6009C1_MGX	0	14	0	IBD	Schirmir_2018
M00338	P6009C1_MGX	0	14	0	IBD	Schirmir_2018
M00345	P6009C1_MGX	0	14	0	IBD	Schirmir_2018
M00356	P6009C1_MGX	0	14	0	IBD	Schirmir_2018
M00357	P6009C1_MGX	0	14	0	IBD	Schirmir_2018
M00358	P6009C1_MGX	0	14	0	IBD	Schirmir_2018
M00363	P6009C1_MGX	0	14	0	IBD	Schirmir_2018
M00364	P6009C1_MGX	11	14	0.785714	IBD	Schirmir_2018
M00365	P6009C1_MGX	7	14	0.5	IBD	Schirmir_2018
M00417	P6009C1_MGX	0	14	0	IBD	Schirmir_2018
M00432	P6009C1_MGX	16	14	1.14286	IBD	Schirmir_2018
M00525	P6009C1_MGX	0	14	0	IBD	Schirmir_2018
M00526	P6009C1_MGX	10	14	0.714286	IBD	Schirmir_2018
M00527	P6009C1_MGX	18	14	1.28571	IBD	Schirmir_2018
M00529	P6009C1_MGX	0	14	0	IBD	Schirmir_2018
M00530	P6009C1_MGX	1	14	0.0714286	IBD	Schirmir_2018
M00533	P6009C1_MGX	0	14	0	IBD	Schirmir_2018
M00535	P6009C1_MGX	8	14	0.571429	IBD	Schirmir_2018
M00545	P6009C1_MGX	0	14	0	IBD	Schirmir_2018
M00546	P6009C1_MGX	0	14	0	IBD	Schirmir_2018
M00549	P6009C1_MGX	6	14	0.428571	IBD	Schirmir_2018
M00550	P6009C1_MGX	0	14	0	IBD	Schirmir_2018
M00551	P6009C1_MGX	0	14	0	IBD	Schirmir_2018
M00552	P6009C1_MGX	0	14	0	IBD	Schirmir_2018
M00554	P6009C1_MGX	1	14	0.0714286	IBD	Schirmir_2018
M00555	P6009C1_MGX	0	14	0	IBD	Schirmir_2018
M00563	P6009C1_MGX	0	14	0	IBD	Schirmir_2018
M00565	P6009C1_MGX	0	14	0	IBD	Schirmir_2018
M00567	P6009C1_MGX	0	14	0	IBD	Schirmir_2018
M00568	P6009C1_MGX	0	14	0	IBD	Schirmir_2018
M00569	P6009C1_MGX	0	14	0	IBD	Schirmir_2018
M00570	P6009C1_MGX	12	14	0.857143	IBD	Schirmir_2018
M00572	P6009C1_MGX	8	14	0.571429	IBD	Schirmir_2018
M00577	P6009C1_MGX	1	14	0.0714286	IBD	Schirmir_2018
M00579	P6009C1_MGX	3	14	0.214286	IBD	Schirmir_2018
M00580	P6009C1_MGX	0	14	0	IBD	Schirmir_2018
M00595	P6009C1_MGX	0	14	0	IBD	Schirmir_2018
M00596	P6009C1_MGX	0	14	0	IBD	Schirmir_2018
M00608	P6009C1_MGX	0	14	0	IBD	Schirmir_2018
M00616	P6009C1_MGX	0	14	0	IBD	Schirmir_2018
M00617	P6009C1_MGX	0	14	0	IBD	Schirmir_2018
M00620	P6009C1_MGX	0	14	0	IBD	Schirmir_2018
M00622	P6009C1_MGX	0	14	0	IBD	Schirmir_2018
M00627	P6009C1_MGX	11	14	0.785714	IBD	Schirmir_2018
M00631	P6009C1_MGX	8	14	0.571429	IBD	Schirmir_2018
M00632	P6009C1_MGX	1	14	0.0714286	IBD	Schirmir_2018
M00637	P6009C1_MGX	0	14	0	IBD	Schirmir_2018
M00641	P6009C1_MGX	0	14	0	IBD	Schirmir_2018
M00642	P6009C1_MGX	0	14	0	IBD	Schirmir_2018
M00649	P6009C1_MGX	0	14	0	IBD	Schirmir_2018
M00651	P6009C1_MGX	8	14	0.571429	IBD	Schirmir_2018
M00652	P6009C1_MGX	0	14	0	IBD	Schirmir_2018
M00696	P6009C1_MGX	0	14	0	IBD	Schirmir_2018
M00697	P6009C1_MGX	0	14	0	IBD	Schirmir_2018
M00698	P6009C1_MGX	0	14	0	IBD	Schirmir_2018
M00700	P6009C1_MGX	0	14	0	IBD	Schirmir_2018
M00702	P6009C1_MGX	0	14	0	IBD	Schirmir_2018
M00705	P6009C1_MGX	4	14	0.285714	IBD	Schirmir_2018
M00725	P6009C1_MGX	0	14	0	IBD	Schirmir_2018
M00741	P6009C1_MGX	11	14	0.785714	IBD	Schirmir_2018
M00745	P6009C1_MGX	0	14	0	IBD	Schirmir_2018
M00761	P6009C1_MGX	0	14	0	IBD	Schirmir_2018
M00793	P6009C1_MGX	15	14	1.07143	IBD	Schirmir_2018
M00844	P6009C1_MGX	10	14	0.714286	IBD	Schirmir_2018
M00846	P6009C1_MGX	2	14	0.142857	IBD	Schirmir_2018
M00847	P6009C1_MGX	0	14	0	IBD	Schirmir_2018
M00854	P6009C1_MGX	24	14	1.71429	IBD	Schirmir_2018
M00855	P6009C1_MGX	13	14	0.928571	IBD	Schirmir_2018
M00866	P6009C1_MGX	0	14	0	IBD	Schirmir_2018
M00877	P6009C1_MGX	0	14	0	IBD	Schirmir_2018
M00878	P6009C1_MGX	0	14	0	IBD	Schirmir_2018
M00879	P6009C1_MGX	0	14	0	IBD	Schirmir_2018
M00880	P6009C1_MGX	1	14	0.0714286	IBD	Schirmir_2018
M00881	P6009C1_MGX	8	14	0.571429	IBD	Schirmir_2018
M00882	P6009C1_MGX	1	14	0.0714286	IBD	Schirmir_2018
M00883	P6009C1_MGX	0	14	0	IBD	Schirmir_2018
M00895	P6009C1_MGX	0	14	0	IBD	Schirmir_2018
M00896	P6009C1_MGX	1	14	0.0714286	IBD	Schirmir_2018
M00899	P6009C1_MGX	9	14	0.642857	IBD	Schirmir_2018
M00909	P6009C1_MGX	7	14	0.5	IBD	Schirmir_2018
M00914	P6009C1_MGX	0	14	0	IBD	Schirmir_2018
M00916	P6009C1_MGX	4	14	0.285714	IBD	Schirmir_2018
M00918	P6009C1_MGX	0	14	0	IBD	Schirmir_2018
M00922	P6009C1_MGX	0	14	0	IBD	Schirmir_2018
M00923	P6009C1_MGX	0	14	0	IBD	Schirmir_2018
M00924	P6009C1_MGX	2	14	0.142857	IBD	Schirmir_2018
M00925	P6009C1_MGX	0	14	0	IBD	Schirmir_2018
M00926	P6009C1_MGX	0	14	0	IBD	Schirmir_2018
M00930	P6009C1_MGX	0	14	0	IBD	Schirmir_2018
M00931	P6009C1_MGX	0	14	0	IBD	Schirmir_2018
M00935	P6009C1_MGX	0	14	0	IBD	Schirmir_2018
M00001	IBDMDB_CD_MSM6J2IY	10	12	0.833333	IBD	Lloyd-Price_2019
M00002	IBDMDB_CD_MSM6J2IY	10	12	0.833333	IBD	Lloyd-Price_2019
M00003	IBDMDB_CD_MSM6J2IY	10	12	0.833333	IBD	Lloyd-Price_2019
M00004	IBDMDB_CD_MSM6J2IY	4	12	0.333333	IBD	Lloyd-Price_2019
M00005	IBDMDB_CD_MSM6J2IY	15	12	1.25	IBD	Lloyd-Price_2019
M00006	IBDMDB_CD_MSM6J2IY	4	12	0.333333	IBD	Lloyd-Price_2019
M00007	IBDMDB_CD_MSM6J2IY	8	12	0.666667	IBD	Lloyd-Price_2019
M00008	IBDMDB_CD_MSM6J2IY	0	12	0	IBD	Lloyd-Price_2019
M00009	IBDMDB_CD_MSM6J2IY	0	12	0	IBD	Lloyd-Price_2019
M00010	IBDMDB_CD_MSM6J2IY	0	12	0	IBD	Lloyd-Price_2019
M00011	IBDMDB_CD_MSM6J2IY	3	12	0.25	IBD	Lloyd-Price_2019
M00012	IBDMDB_CD_MSM6J2IY	0	12	0	IBD	Lloyd-Price_2019
M00015	IBDMDB_CD_MSM6J2IY	12	12	1	IBD	Lloyd-Price_2019
M00016	IBDMDB_CD_MSM6J2IY	0	12	0	IBD	Lloyd-Price_2019
M00017	IBDMDB_CD_MSM6J2IY	1	12	0.0833333	IBD	Lloyd-Price_2019
M00018	IBDMDB_CD_MSM6J2IY	9	12	0.75	IBD	Lloyd-Price_2019
M00019	IBDMDB_CD_MSM6J2IY	14	12	1.16667	IBD	Lloyd-Price_2019
M00020	IBDMDB_CD_MSM6J2IY	9	12	0.75	IBD	Lloyd-Price_2019
M00021	IBDMDB_CD_MSM6J2IY	15	12	1.25	IBD	Lloyd-Price_2019
M00022	IBDMDB_CD_MSM6J2IY	9	12	0.75	IBD	Lloyd-Price_2019
M00023	IBDMDB_CD_MSM6J2IY	8	12	0.666667	IBD	Lloyd-Price_2019
M00024	IBDMDB_CD_MSM6J2IY	0	12	0	IBD	Lloyd-Price_2019
M00025	IBDMDB_CD_MSM6J2IY	0	12	0	IBD	Lloyd-Price_2019
M00026	IBDMDB_CD_MSM6J2IY	9	12	0.75	IBD	Lloyd-Price_2019
M00027	IBDMDB_CD_MSM6J2IY	0	12	0	IBD	Lloyd-Price_2019
M00028	IBDMDB_CD_MSM6J2IY	10	12	0.833333	IBD	Lloyd-Price_2019
M00034	IBDMDB_CD_MSM6J2IY	0	12	0	IBD	Lloyd-Price_2019
M00035	IBDMDB_CD_MSM6J2IY	0	12	0	IBD	Lloyd-Price_2019
M00036	IBDMDB_CD_MSM6J2IY	0	12	0	IBD	Lloyd-Price_2019
M00040	IBDMDB_CD_MSM6J2IY	0	12	0	IBD	Lloyd-Price_2019
M00044	IBDMDB_CD_MSM6J2IY	0	12	0	IBD	Lloyd-Price_2019
M00045	IBDMDB_CD_MSM6J2IY	3	12	0.25	IBD	Lloyd-Price_2019
M00046	IBDMDB_CD_MSM6J2IY	0	12	0	IBD	Lloyd-Price_2019
M00048	IBDMDB_CD_MSM6J2IY	12	12	1	IBD	Lloyd-Price_2019
M00049	IBDMDB_CD_MSM6J2IY	12	12	1	IBD	Lloyd-Price_2019
M00050	IBDMDB_CD_MSM6J2IY	12	12	1	IBD	Lloyd-Price_2019
M00051	IBDMDB_CD_MSM6J2IY	12	12	1	IBD	Lloyd-Price_2019
M00052	IBDMDB_CD_MSM6J2IY	5	12	0.416667	IBD	Lloyd-Price_2019
M00053	IBDMDB_CD_MSM6J2IY	1	12	0.0833333	IBD	Lloyd-Price_2019
M00060	IBDMDB_CD_MSM6J2IY	0	12	0	IBD	Lloyd-Price_2019
M00061	IBDMDB_CD_MSM6J2IY	2	12	0.166667	IBD	Lloyd-Price_2019
M00063	IBDMDB_CD_MSM6J2IY	5	12	0.416667	IBD	Lloyd-Price_2019
M00064	IBDMDB_CD_MSM6J2IY	2	12	0.166667	IBD	Lloyd-Price_2019
M00082	IBDMDB_CD_MSM6J2IY	5	12	0.416667	IBD	Lloyd-Price_2019
M00083	IBDMDB_CD_MSM6J2IY	16	12	1.33333	IBD	Lloyd-Price_2019
M00086	IBDMDB_CD_MSM6J2IY	15	12	1.25	IBD	Lloyd-Price_2019
M00087	IBDMDB_CD_MSM6J2IY	0	12	0	IBD	Lloyd-Price_2019
M00088	IBDMDB_CD_MSM6J2IY	0	12	0	IBD	Lloyd-Price_2019
M00091	IBDMDB_CD_MSM6J2IY	0	12	0	IBD	Lloyd-Price_2019
M00093	IBDMDB_CD_MSM6J2IY	6	12	0.5	IBD	Lloyd-Price_2019
M00095	IBDMDB_CD_MSM6J2IY	0	12	0	IBD	Lloyd-Price_2019
M00096	IBDMDB_CD_MSM6J2IY	9	12	0.75	IBD	Lloyd-Price_2019
M00098	IBDMDB_CD_MSM6J2IY	2	12	0.166667	IBD	Lloyd-Price_2019
M00115	IBDMDB_CD_MSM6J2IY	8	12	0.666667	IBD	Lloyd-Price_2019
M00116	IBDMDB_CD_MSM6J2IY	0	12	0	IBD	Lloyd-Price_2019
M00117	IBDMDB_CD_MSM6J2IY	0	12	0	IBD	Lloyd-Price_2019
M00118	IBDMDB_CD_MSM6J2IY	0	12	0	IBD	Lloyd-Price_2019
M00119	IBDMDB_CD_MSM6J2IY	8	12	0.666667	IBD	Lloyd-Price_2019
M00120	IBDMDB_CD_MSM6J2IY	13	12	1.08333	IBD	Lloyd-Price_2019
M00121	IBDMDB_CD_MSM6J2IY	0	12	0	IBD	Lloyd-Price_2019
M00122	IBDMDB_CD_MSM6J2IY	11	12	0.916667	IBD	Lloyd-Price_2019
M00123	IBDMDB_CD_MSM6J2IY	5	12	0.416667	IBD	Lloyd-Price_2019
M00124	IBDMDB_CD_MSM6J2IY	0	12	0	IBD	Lloyd-Price_2019
M00125	IBDMDB_CD_MSM6J2IY	8	12	0.666667	IBD	Lloyd-Price_2019
M00126	IBDMDB_CD_MSM6J2IY	4	12	0.333333	IBD	Lloyd-Price_2019
M00127	IBDMDB_CD_MSM6J2IY	5	12	0.416667	IBD	Lloyd-Price_2019
M00133	IBDMDB_CD_MSM6J2IY	0	12	0	IBD	Lloyd-Price_2019
M00134	IBDMDB_CD_MSM6J2IY	0	12	0	IBD	Lloyd-Price_2019
M00136	IBDMDB_CD_MSM6J2IY	0	12	0	IBD	Lloyd-Price_2019
M00140	IBDMDB_CD_MSM6J2IY	10	12	0.833333	IBD	Lloyd-Price_2019
M00142	IBDMDB_CD_MSM6J2IY	0	12	0	IBD	Lloyd-Price_2019
M00144	IBDMDB_CD_MSM6J2IY	6	12	0.5	IBD	Lloyd-Price_2019
M00145	IBDMDB_CD_MSM6J2IY	0	12	0	IBD	Lloyd-Price_2019
M00149	IBDMDB_CD_MSM6J2IY	0	12	0	IBD	Lloyd-Price_2019
M00150	IBDMDB_CD_MSM6J2IY	0	12	0	IBD	Lloyd-Price_2019
M00151	IBDMDB_CD_MSM6J2IY	0	12	0	IBD	Lloyd-Price_2019
M00153	IBDMDB_CD_MSM6J2IY	0	12	0	IBD	Lloyd-Price_2019
M00155	IBDMDB_CD_MSM6J2IY	0	12	0	IBD	Lloyd-Price_2019
M00156	IBDMDB_CD_MSM6J2IY	0	12	0	IBD	Lloyd-Price_2019
M00157	IBDMDB_CD_MSM6J2IY	14	12	1.16667	IBD	Lloyd-Price_2019
M00159	IBDMDB_CD_MSM6J2IY	6	12	0.5	IBD	Lloyd-Price_2019
M00161	IBDMDB_CD_MSM6J2IY	0	12	0	IBD	Lloyd-Price_2019
M00166	IBDMDB_CD_MSM6J2IY	0	12	0	IBD	Lloyd-Price_2019
M00168	IBDMDB_CD_MSM6J2IY	1	12	0.0833333	IBD	Lloyd-Price_2019
M00169	IBDMDB_CD_MSM6J2IY	5	12	0.416667	IBD	Lloyd-Price_2019
M00175	IBDMDB_CD_MSM6J2IY	0	12	0	IBD	Lloyd-Price_2019
M00176	IBDMDB_CD_MSM6J2IY	0	12	0	IBD	Lloyd-Price_2019
M00307	IBDMDB_CD_MSM6J2IY	11	12	0.916667	IBD	Lloyd-Price_2019
M00308	IBDMDB_CD_MSM6J2IY	0	12	0	IBD	Lloyd-Price_2019
M00338	IBDMDB_CD_MSM6J2IY	0	12	0	IBD	Lloyd-Price_2019
M00345	IBDMDB_CD_MSM6J2IY	1	12	0.0833333	IBD	Lloyd-Price_2019
M00356	IBDMDB_CD_MSM6J2IY	0	12	0	IBD	Lloyd-Price_2019
M00357	IBDMDB_CD_MSM6J2IY	0	12	0	IBD	Lloyd-Price_2019
M00358	IBDMDB_CD_MSM6J2IY	0	12	0	IBD	Lloyd-Price_2019
M00363	IBDMDB_CD_MSM6J2IY	0	12	0	IBD	Lloyd-Price_2019
M00364	IBDMDB_CD_MSM6J2IY	2	12	0.166667	IBD	Lloyd-Price_2019
M00365	IBDMDB_CD_MSM6J2IY	1	12	0.0833333	IBD	Lloyd-Price_2019
M00417	IBDMDB_CD_MSM6J2IY	0	12	0	IBD	Lloyd-Price_2019
M00432	IBDMDB_CD_MSM6J2IY	10	12	0.833333	IBD	Lloyd-Price_2019
M00525	IBDMDB_CD_MSM6J2IY	0	12	0	IBD	Lloyd-Price_2019
M00526	IBDMDB_CD_MSM6J2IY	4	12	0.333333	IBD	Lloyd-Price_2019
M00527	IBDMDB_CD_MSM6J2IY	13	12	1.08333	IBD	Lloyd-Price_2019
M00529	IBDMDB_CD_MSM6J2IY	0	12	0	IBD	Lloyd-Price_2019
M00530	IBDMDB_CD_MSM6J2IY	2	12	0.166667	IBD	Lloyd-Price_2019
M00533	IBDMDB_CD_MSM6J2IY	0	12	0	IBD	Lloyd-Price_2019
M00535	IBDMDB_CD_MSM6J2IY	4	12	0.333333	IBD	Lloyd-Price_2019
M00545	IBDMDB_CD_MSM6J2IY	0	12	0	IBD	Lloyd-Price_2019
M00546	IBDMDB_CD_MSM6J2IY	0	12	0	IBD	Lloyd-Price_2019
M00549	IBDMDB_CD_MSM6J2IY	5	12	0.416667	IBD	Lloyd-Price_2019
M00550	IBDMDB_CD_MSM6J2IY	0	12	0	IBD	Lloyd-Price_2019
M00551	IBDMDB_CD_MSM6J2IY	0	12	0	IBD	Lloyd-Price_2019
M00552	IBDMDB_CD_MSM6J2IY	0	12	0	IBD	Lloyd-Price_2019
M00554	IBDMDB_CD_MSM6J2IY	0	12	0	IBD	Lloyd-Price_2019
M00555	IBDMDB_CD_MSM6J2IY	0	12	0	IBD	Lloyd-Price_2019
M00563	IBDMDB_CD_MSM6J2IY	0	12	0	IBD	Lloyd-Price_2019
M00565	IBDMDB_CD_MSM6J2IY	0	12	0	IBD	Lloyd-Price_2019
M00567	IBDMDB_CD_MSM6J2IY	0	12	0	IBD	Lloyd-Price_2019
M00568	IBDMDB_CD_MSM6J2IY	0	12	0	IBD	Lloyd-Price_2019
M00569	IBDMDB_CD_MSM6J2IY	0	12	0	IBD	Lloyd-Price_2019
M00570	IBDMDB_CD_MSM6J2IY	11	12	0.916667	IBD	Lloyd-Price_2019
M00572	IBDMDB_CD_MSM6J2IY	4	12	0.333333	IBD	Lloyd-Price_2019
M00577	IBDMDB_CD_MSM6J2IY	0	12	0	IBD	Lloyd-Price_2019
M00579	IBDMDB_CD_MSM6J2IY	3	12	0.25	IBD	Lloyd-Price_2019
M00580	IBDMDB_CD_MSM6J2IY	1	12	0.0833333	IBD	Lloyd-Price_2019
M00595	IBDMDB_CD_MSM6J2IY	0	12	0	IBD	Lloyd-Price_2019
M00596	IBDMDB_CD_MSM6J2IY	0	12	0	IBD	Lloyd-Price_2019
M00608	IBDMDB_CD_MSM6J2IY	0	12	0	IBD	Lloyd-Price_2019
M00616	IBDMDB_CD_MSM6J2IY	0	12	0	IBD	Lloyd-Price_2019
M00617	IBDMDB_CD_MSM6J2IY	0	12	0	IBD	Lloyd-Price_2019
M00620	IBDMDB_CD_MSM6J2IY	0	12	0	IBD	Lloyd-Price_2019
M00622	IBDMDB_CD_MSM6J2IY	0	12	0	IBD	Lloyd-Price_2019
M00627	IBDMDB_CD_MSM6J2IY	7	12	0.583333	IBD	Lloyd-Price_2019
M00631	IBDMDB_CD_MSM6J2IY	5	12	0.416667	IBD	Lloyd-Price_2019
M00632	IBDMDB_CD_MSM6J2IY	0	12	0	IBD	Lloyd-Price_2019
M00637	IBDMDB_CD_MSM6J2IY	0	12	0	IBD	Lloyd-Price_2019
M00641	IBDMDB_CD_MSM6J2IY	0	12	0	IBD	Lloyd-Price_2019
M00642	IBDMDB_CD_MSM6J2IY	0	12	0	IBD	Lloyd-Price_2019
M00649	IBDMDB_CD_MSM6J2IY	0	12	0	IBD	Lloyd-Price_2019
M00651	IBDMDB_CD_MSM6J2IY	6	12	0.5	IBD	Lloyd-Price_2019
M00652	IBDMDB_CD_MSM6J2IY	0	12	0	IBD	Lloyd-Price_2019
M00696	IBDMDB_CD_MSM6J2IY	0	12	0	IBD	Lloyd-Price_2019
M00697	IBDMDB_CD_MSM6J2IY	0	12	0	IBD	Lloyd-Price_2019
M00698	IBDMDB_CD_MSM6J2IY	0	12	0	IBD	Lloyd-Price_2019
M00700	IBDMDB_CD_MSM6J2IY	0	12	0	IBD	Lloyd-Price_2019
M00702	IBDMDB_CD_MSM6J2IY	0	12	0	IBD	Lloyd-Price_2019
M00705	IBDMDB_CD_MSM6J2IY	8	12	0.666667	IBD	Lloyd-Price_2019
M00725	IBDMDB_CD_MSM6J2IY	0	12	0	IBD	Lloyd-Price_2019
M00741	IBDMDB_CD_MSM6J2IY	4	12	0.333333	IBD	Lloyd-Price_2019
M00745	IBDMDB_CD_MSM6J2IY	0	12	0	IBD	Lloyd-Price_2019
M00761	IBDMDB_CD_MSM6J2IY	0	12	0	IBD	Lloyd-Price_2019
M00793	IBDMDB_CD_MSM6J2IY	15	12	1.25	IBD	Lloyd-Price_2019
M00844	IBDMDB_CD_MSM6J2IY	10	12	0.833333	IBD	Lloyd-Price_2019
M00846	IBDMDB_CD_MSM6J2IY	4	12	0.333333	IBD	Lloyd-Price_2019
M00847	IBDMDB_CD_MSM6J2IY	0	12	0	IBD	Lloyd-Price_2019
M00854	IBDMDB_CD_MSM6J2IY	20	12	1.66667	IBD	Lloyd-Price_2019
M00855	IBDMDB_CD_MSM6J2IY	13	12	1.08333	IBD	Lloyd-Price_2019
M00866	IBDMDB_CD_MSM6J2IY	1	12	0.0833333	IBD	Lloyd-Price_2019
M00877	IBDMDB_CD_MSM6J2IY	0	12	0	IBD	Lloyd-Price_2019
M00878	IBDMDB_CD_MSM6J2IY	0	12	0	IBD	Lloyd-Price_2019
M00879	IBDMDB_CD_MSM6J2IY	0	12	0	IBD	Lloyd-Price_2019
M00880	IBDMDB_CD_MSM6J2IY	0	12	0	IBD	Lloyd-Price_2019
M00881	IBDMDB_CD_MSM6J2IY	3	12	0.25	IBD	Lloyd-Price_2019
M00882	IBDMDB_CD_MSM6J2IY	0	12	0	IBD	Lloyd-Price_2019
M00883	IBDMDB_CD_MSM6J2IY	0	12	0	IBD	Lloyd-Price_2019
M00895	IBDMDB_CD_MSM6J2IY	0	12	0	IBD	Lloyd-Price_2019
M00896	IBDMDB_CD_MSM6J2IY	0	12	0	IBD	Lloyd-Price_2019
M00899	IBDMDB_CD_MSM6J2IY	8	12	0.666667	IBD	Lloyd-Price_2019
M00909	IBDMDB_CD_MSM6J2IY	2	12	0.166667	IBD	Lloyd-Price_2019
M00914	IBDMDB_CD_MSM6J2IY	0	12	0	IBD	Lloyd-Price_2019
M00916	IBDMDB_CD_MSM6J2IY	5	12	0.416667	IBD	Lloyd-Price_2019
M00918	IBDMDB_CD_MSM6J2IY	0	12	0	IBD	Lloyd-Price_2019
M00922	IBDMDB_CD_MSM6J2IY	0	12	0	IBD	Lloyd-Price_2019
M00923	IBDMDB_CD_MSM6J2IY	0	12	0	IBD	Lloyd-Price_2019
M00924	IBDMDB_CD_MSM6J2IY	6	12	0.5	IBD	Lloyd-Price_2019
M00925	IBDMDB_CD_MSM6J2IY	0	12	0	IBD	Lloyd-Price_2019
M00926	IBDMDB_CD_MSM6J2IY	0	12	0	IBD	Lloyd-Price_2019
M00930	IBDMDB_CD_MSM6J2IY	0	12	0	IBD	Lloyd-Price_2019
M00931	IBDMDB_CD_MSM6J2IY	0	12	0	IBD	Lloyd-Price_2019
M00935	IBDMDB_CD_MSM6J2IY	0	12	0	IBD	Lloyd-Price_2019
M00001	IBDMDB_CD_PSM7J199	10	8	1.25	IBD	Lloyd-Price_2019
M00002	IBDMDB_CD_PSM7J199	10	8	1.25	IBD	Lloyd-Price_2019
M00003	IBDMDB_CD_PSM7J199	10	8	1.25	IBD	Lloyd-Price_2019
M00004	IBDMDB_CD_PSM7J199	8	8	1	IBD	Lloyd-Price_2019
M00005	IBDMDB_CD_PSM7J199	10	8	1.25	IBD	Lloyd-Price_2019
M00006	IBDMDB_CD_PSM7J199	8	8	1	IBD	Lloyd-Price_2019
M00007	IBDMDB_CD_PSM7J199	8	8	1	IBD	Lloyd-Price_2019
M00008	IBDMDB_CD_PSM7J199	0	8	0	IBD	Lloyd-Price_2019
M00009	IBDMDB_CD_PSM7J199	0	8	0	IBD	Lloyd-Price_2019
M00010	IBDMDB_CD_PSM7J199	0	8	0	IBD	Lloyd-Price_2019
M00011	IBDMDB_CD_PSM7J199	3	8	0.375	IBD	Lloyd-Price_2019
M00012	IBDMDB_CD_PSM7J199	0	8	0	IBD	Lloyd-Price_2019
M00015	IBDMDB_CD_PSM7J199	8	8	1	IBD	Lloyd-Price_2019
M00016	IBDMDB_CD_PSM7J199	1	8	0.125	IBD	Lloyd-Price_2019
M00017	IBDMDB_CD_PSM7J199	0	8	0	IBD	Lloyd-Price_2019
M00018	IBDMDB_CD_PSM7J199	1	8	0.125	IBD	Lloyd-Price_2019
M00019	IBDMDB_CD_PSM7J199	8	8	1	IBD	Lloyd-Price_2019
M00020	IBDMDB_CD_PSM7J199	7	8	0.875	IBD	Lloyd-Price_2019
M00021	IBDMDB_CD_PSM7J199	12	8	1.5	IBD	Lloyd-Price_2019
M00022	IBDMDB_CD_PSM7J199	5	8	0.625	IBD	Lloyd-Price_2019
M00023	IBDMDB_CD_PSM7J199	5	8	0.625	IBD	Lloyd-Price_2019
M00024	IBDMDB_CD_PSM7J199	0	8	0	IBD	Lloyd-Price_2019
M00025	IBDMDB_CD_PSM7J199	0	8	0	IBD	Lloyd-Price_2019
M00026	IBDMDB_CD_PSM7J199	7	8	0.875	IBD	Lloyd-Price_2019
M00027	IBDMDB_CD_PSM7J199	0	8	0	IBD	Lloyd-Price_2019
M00028	IBDMDB_CD_PSM7J199	3	8	0.375	IBD	Lloyd-Price_2019
M00034	IBDMDB_CD_PSM7J199	0	8	0	IBD	Lloyd-Price_2019
M00035	IBDMDB_CD_PSM7J199	0	8	0	IBD	Lloyd-Price_2019
M00036	IBDMDB_CD_PSM7J199	0	8	0	IBD	Lloyd-Price_2019
M00040	IBDMDB_CD_PSM7J199	0	8	0	IBD	Lloyd-Price_2019
M00044	IBDMDB_CD_PSM7J199	0	8	0	IBD	Lloyd-Price_2019
M00045	IBDMDB_CD_PSM7J199	6	8	0.75	IBD	Lloyd-Price_2019
M00046	IBDMDB_CD_PSM7J199	0	8	0	IBD	Lloyd-Price_2019
M00048	IBDMDB_CD_PSM7J199	9	8	1.125	IBD	Lloyd-Price_2019
M00049	IBDMDB_CD_PSM7J199	9	8	1.125	IBD	Lloyd-Price_2019
M00050	IBDMDB_CD_PSM7J199	9	8	1.125	IBD	Lloyd-Price_2019
M00051	IBDMDB_CD_PSM7J199	10	8	1.25	IBD	Lloyd-Price_2019
M00052	IBDMDB_CD_PSM7J199	3	8	0.375	IBD	Lloyd-Price_2019
M00053	IBDMDB_CD_PSM7J199	0	8	0	IBD	Lloyd-Price_2019
M00060	IBDMDB_CD_PSM7J199	0	8	0	IBD	Lloyd-Price_2019
M00061	IBDMDB_CD_PSM7J199	0	8	0	IBD	Lloyd-Price_2019
M00063	IBDMDB_CD_PSM7J199	8	8	1	IBD	Lloyd-Price_2019
M00064	IBDMDB_CD_PSM7J199	1	8	0.125	IBD	Lloyd-Price_2019
M00082	IBDMDB_CD_PSM7J199	1	8	0.125	IBD	Lloyd-Price_2019
M00083	IBDMDB_CD_PSM7J199	15	8	1.875	IBD	Lloyd-Price_2019
M00086	IBDMDB_CD_PSM7J199	30	8	3.75	IBD	Lloyd-Price_2019
M00087	IBDMDB_CD_PSM7J199	0	8	0	IBD	Lloyd-Price_2019
M00088	IBDMDB_CD_PSM7J199	0	8	0	IBD	Lloyd-Price_2019
M00091	IBDMDB_CD_PSM7J199	0	8	0	IBD	Lloyd-Price_2019
M00093	IBDMDB_CD_PSM7J199	8	8	1	IBD	Lloyd-Price_2019
M00095	IBDMDB_CD_PSM7J199	0	8	0	IBD	Lloyd-Price_2019
M00096	IBDMDB_CD_PSM7J199	5	8	0.625	IBD	Lloyd-Price_2019
M00098	IBDMDB_CD_PSM7J199	1	8	0.125	IBD	Lloyd-Price_2019
M00115	IBDMDB_CD_PSM7J199	7	8	0.875	IBD	Lloyd-Price_2019
M00116	IBDMDB_CD_PSM7J199	0	8	0	IBD	Lloyd-Price_2019
M00117	IBDMDB_CD_PSM7J199	0	8	0	IBD	Lloyd-Price_2019
M00118	IBDMDB_CD_PSM7J199	0	8	0	IBD	Lloyd-Price_2019
M00119	IBDMDB_CD_PSM7J199	6	8	0.75	IBD	Lloyd-Price_2019
M00120	IBDMDB_CD_PSM7J199	8	8	1	IBD	Lloyd-Price_2019
M00121	IBDMDB_CD_PSM7J199	0	8	0	IBD	Lloyd-Price_2019
M00122	IBDMDB_CD_PSM7J199	7	8	0.875	IBD	Lloyd-Price_2019
M00123	IBDMDB_CD_PSM7J199	7	8	0.875	IBD	Lloyd-Price_2019
M00124	IBDMDB_CD_PSM7J199	0	8	0	IBD	Lloyd-Price_2019
M00125	IBDMDB_CD_PSM7J199	9	8	1.125	IBD	Lloyd-Price_2019
M00126	IBDMDB_CD_PSM7J199	8	8	1	IBD	Lloyd-Price_2019
M00127	IBDMDB_CD_PSM7J199	2	8	0.25	IBD	Lloyd-Price_2019
M00133	IBDMDB_CD_PSM7J199	1	8	0.125	IBD	Lloyd-Price_2019
M00134	IBDMDB_CD_PSM7J199	0	8	0	IBD	Lloyd-Price_2019
M00136	IBDMDB_CD_PSM7J199	0	8	0	IBD	Lloyd-Price_2019
M00140	IBDMDB_CD_PSM7J199	9	8	1.125	IBD	Lloyd-Price_2019
M00142	IBDMDB_CD_PSM7J199	0	8	0	IBD	Lloyd-Price_2019
M00144	IBDMDB_CD_PSM7J199	12	8	1.5	IBD	Lloyd-Price_2019
M00145	IBDMDB_CD_PSM7J199	0	8	0	IBD	Lloyd-Price_2019
M00149	IBDMDB_CD_PSM7J199	0	8	0	IBD	Lloyd-Price_2019
M00150	IBDMDB_CD_PSM7J199	0	8	0	IBD	Lloyd-Price_2019
M00151	IBDMDB_CD_PSM7J199	0	8	0	IBD	Lloyd-Price_2019
M00153	IBDMDB_CD_PSM7J199	0	8	0	IBD	Lloyd-Price_2019
M00155	IBDMDB_CD_PSM7J199	0	8	0	IBD	Lloyd-Price_2019
M00156	IBDMDB_CD_PSM7J199	0	8	0	IBD	Lloyd-Price_2019
M00157	IBDMDB_CD_PSM7J199	9	8	1.125	IBD	Lloyd-Price_2019
M00159	IBDMDB_CD_PSM7J199	6	8	0.75	IBD	Lloyd-Price_2019
M00161	IBDMDB_CD_PSM7J199	0	8	0	IBD	Lloyd-Price_2019
M00166	IBDMDB_CD_PSM7J199	0	8	0	IBD	Lloyd-Price_2019
M00168	IBDMDB_CD_PSM7J199	0	8	0	IBD	Lloyd-Price_2019
M00169	IBDMDB_CD_PSM7J199	8	8	1	IBD	Lloyd-Price_2019
M00175	IBDMDB_CD_PSM7J199	0	8	0	IBD	Lloyd-Price_2019
M00176	IBDMDB_CD_PSM7J199	0	8	0	IBD	Lloyd-Price_2019
M00307	IBDMDB_CD_PSM7J199	10	8	1.25	IBD	Lloyd-Price_2019
M00308	IBDMDB_CD_PSM7J199	0	8	0	IBD	Lloyd-Price_2019
M00338	IBDMDB_CD_PSM7J199	0	8	0	IBD	Lloyd-Price_2019
M00345	IBDMDB_CD_PSM7J199	0	8	0	IBD	Lloyd-Price_2019
M00356	IBDMDB_CD_PSM7J199	0	8	0	IBD	Lloyd-Price_2019
M00357	IBDMDB_CD_PSM7J199	0	8	0	IBD	Lloyd-Price_2019
M00358	IBDMDB_CD_PSM7J199	0	8	0	IBD	Lloyd-Price_2019
M00363	IBDMDB_CD_PSM7J199	0	8	0	IBD	Lloyd-Price_2019
M00364	IBDMDB_CD_PSM7J199	5	8	0.625	IBD	Lloyd-Price_2019
M00365	IBDMDB_CD_PSM7J199	4	8	0.5	IBD	Lloyd-Price_2019
M00417	IBDMDB_CD_PSM7J199	0	8	0	IBD	Lloyd-Price_2019
M00432	IBDMDB_CD_PSM7J199	8	8	1	IBD	Lloyd-Price_2019
M00525	IBDMDB_CD_PSM7J199	0	8	0	IBD	Lloyd-Price_2019
M00526	IBDMDB_CD_PSM7J199	8	8	1	IBD	Lloyd-Price_2019
M00527	IBDMDB_CD_PSM7J199	8	8	1	IBD	Lloyd-Price_2019
M00529	IBDMDB_CD_PSM7J199	0	8	0	IBD	Lloyd-Price_2019
M00530	IBDMDB_CD_PSM7J199	0	8	0	IBD	Lloyd-Price_2019
M00533	IBDMDB_CD_PSM7J199	0	8	0	IBD	Lloyd-Price_2019
M00535	IBDMDB_CD_PSM7J199	6	8	0.75	IBD	Lloyd-Price_2019
M00545	IBDMDB_CD_PSM7J199	0	8	0	IBD	Lloyd-Price_2019
M00546	IBDMDB_CD_PSM7J199	0	8	0	IBD	Lloyd-Price_2019
M00549	IBDMDB_CD_PSM7J199	2	8	0.25	IBD	Lloyd-Price_2019
M00550	IBDMDB_CD_PSM7J199	0	8	0	IBD	Lloyd-Price_2019
M00551	IBDMDB_CD_PSM7J199	0	8	0	IBD	Lloyd-Price_2019
M00552	IBDMDB_CD_PSM7J199	0	8	0	IBD	Lloyd-Price_2019
M00554	IBDMDB_CD_PSM7J199	0	8	0	IBD	Lloyd-Price_2019
M00555	IBDMDB_CD_PSM7J199	0	8	0	IBD	Lloyd-Price_2019
M00563	IBDMDB_CD_PSM7J199	0	8	0	IBD	Lloyd-Price_2019
M00565	IBDMDB_CD_PSM7J199	0	8	0	IBD	Lloyd-Price_2019
M00567	IBDMDB_CD_PSM7J199	0	8	0	IBD	Lloyd-Price_2019
M00568	IBDMDB_CD_PSM7J199	0	8	0	IBD	Lloyd-Price_2019
M00569	IBDMDB_CD_PSM7J199	0	8	0	IBD	Lloyd-Price_2019
M00570	IBDMDB_CD_PSM7J199	5	8	0.625	IBD	Lloyd-Price_2019
M00572	IBDMDB_CD_PSM7J199	7	8	0.875	IBD	Lloyd-Price_2019
M00577	IBDMDB_CD_PSM7J199	0	8	0	IBD	Lloyd-Price_2019
M00579	IBDMDB_CD_PSM7J199	2	8	0.25	IBD	Lloyd-Price_2019
M00580	IBDMDB_CD_PSM7J199	0	8	0	IBD	Lloyd-Price_2019
M00595	IBDMDB_CD_PSM7J199	0	8	0	IBD	Lloyd-Price_2019
M00596	IBDMDB_CD_PSM7J199	0	8	0	IBD	Lloyd-Price_2019
M00608	IBDMDB_CD_PSM7J199	0	8	0	IBD	Lloyd-Price_2019
M00616	IBDMDB_CD_PSM7J199	0	8	0	IBD	Lloyd-Price_2019
M00617	IBDMDB_CD_PSM7J199	0	8	0	IBD	Lloyd-Price_2019
M00620	IBDMDB_CD_PSM7J199	0	8	0	IBD	Lloyd-Price_2019
M00622	IBDMDB_CD_PSM7J199	0	8	0	IBD	Lloyd-Price_2019
M00627	IBDMDB_CD_PSM7J199	11	8	1.375	IBD	Lloyd-Price_2019
M00631	IBDMDB_CD_PSM7J199	6	8	0.75	IBD	Lloyd-Price_2019
M00632	IBDMDB_CD_PSM7J199	0	8	0	IBD	Lloyd-Price_2019
M00637	IBDMDB_CD_PSM7J199	0	8	0	IBD	Lloyd-Price_2019
M00641	IBDMDB_CD_PSM7J199	0	8	0	IBD	Lloyd-Price_2019
M00642	IBDMDB_CD_PSM7J199	0	8	0	IBD	Lloyd-Price_2019
M00649	IBDMDB_CD_PSM7J199	0	8	0	IBD	Lloyd-Price_2019
M00651	IBDMDB_CD_PSM7J199	6	8	0.75	IBD	Lloyd-Price_2019
M00652	IBDMDB_CD_PSM7J199	0	8	0	IBD	Lloyd-Price_2019
M00696	IBDMDB_CD_PSM7J199	0	8	0	IBD	Lloyd-Price_2019
M00697	IBDMDB_CD_PSM7J199	0	8	0	IBD	Lloyd-Price_2019
M00698	IBDMDB_CD_PSM7J199	0	8	0	IBD	Lloyd-Price_2019
M00700	IBDMDB_CD_PSM7J199	0	8	0	IBD	Lloyd-Price_2019
M00702	IBDMDB_CD_PSM7J199	0	8	0	IBD	Lloyd-Price_2019
M00705	IBDMDB_CD_PSM7J199	2	8	0.25	IBD	Lloyd-Price_2019
M00725	IBDMDB_CD_PSM7J199	0	8	0	IBD	Lloyd-Price_2019
M00741	IBDMDB_CD_PSM7J199	7	8	0.875	IBD	Lloyd-Price_2019
M00745	IBDMDB_CD_PSM7J199	0	8	0	IBD	Lloyd-Price_2019
M00761	IBDMDB_CD_PSM7J199	0	8	0	IBD	Lloyd-Price_2019
M00793	IBDMDB_CD_PSM7J199	13	8	1.625	IBD	Lloyd-Price_2019
M00844	IBDMDB_CD_PSM7J199	3	8	0.375	IBD	Lloyd-Price_2019
M00846	IBDMDB_CD_PSM7J199	0	8	0	IBD	Lloyd-Price_2019
M00847	IBDMDB_CD_PSM7J199	0	8	0	IBD	Lloyd-Price_2019
M00854	IBDMDB_CD_PSM7J199	8	8	1	IBD	Lloyd-Price_2019
M00855	IBDMDB_CD_PSM7J199	8	8	1	IBD	Lloyd-Price_2019
M00866	IBDMDB_CD_PSM7J199	1	8	0.125	IBD	Lloyd-Price_2019
M00877	IBDMDB_CD_PSM7J199	0	8	0	IBD	Lloyd-Price_2019
M00878	IBDMDB_CD_PSM7J199	0	8	0	IBD	Lloyd-Price_2019
M00879	IBDMDB_CD_PSM7J199	0	8	0	IBD	Lloyd-Price_2019
M00880	IBDMDB_CD_PSM7J199	0	8	0	IBD	Lloyd-Price_2019
M00881	IBDMDB_CD_PSM7J199	10	8	1.25	IBD	Lloyd-Price_2019
M00882	IBDMDB_CD_PSM7J199	0	8	0	IBD	Lloyd-Price_2019
M00883	IBDMDB_CD_PSM7J199	0	8	0	IBD	Lloyd-Price_2019
M00895	IBDMDB_CD_PSM7J199	0	8	0	IBD	Lloyd-Price_2019
M00896	IBDMDB_CD_PSM7J199	2	8	0.25	IBD	Lloyd-Price_2019
M00899	IBDMDB_CD_PSM7J199	1	8	0.125	IBD	Lloyd-Price_2019
M00909	IBDMDB_CD_PSM7J199	1	8	0.125	IBD	Lloyd-Price_2019
M00914	IBDMDB_CD_PSM7J199	0	8	0	IBD	Lloyd-Price_2019
M00916	IBDMDB_CD_PSM7J199	0	8	0	IBD	Lloyd-Price_2019
M00918	IBDMDB_CD_PSM7J199	0	8	0	IBD	Lloyd-Price_2019
M00922	IBDMDB_CD_PSM7J199	0	8	0	IBD	Lloyd-Price_2019
M00923	IBDMDB_CD_PSM7J199	0	8	0	IBD	Lloyd-Price_2019
M00924	IBDMDB_CD_PSM7J199	0	8	0	IBD	Lloyd-Price_2019
M00925	IBDMDB_CD_PSM7J199	0	8	0	IBD	Lloyd-Price_2019
M00926	IBDMDB_CD_PSM7J199	0	8	0	IBD	Lloyd-Price_2019
M00930	IBDMDB_CD_PSM7J199	1	8	0.125	IBD	Lloyd-Price_2019
M00931	IBDMDB_CD_PSM7J199	0	8	0	IBD	Lloyd-Price_2019
M00935	IBDMDB_CD_PSM7J199	0	8	0	IBD	Lloyd-Price_2019
M00001	IBDMDB_UC_PSMA267J	5	8	0.625	IBD	Lloyd-Price_2019
M00002	IBDMDB_UC_PSMA267J	5	8	0.625	IBD	Lloyd-Price_2019
M00003	IBDMDB_UC_PSMA267J	5	8	0.625	IBD	Lloyd-Price_2019
M00004	IBDMDB_UC_PSMA267J	5	8	0.625	IBD	Lloyd-Price_2019
M00005	IBDMDB_UC_PSMA267J	13	8	1.625	IBD	Lloyd-Price_2019
M00006	IBDMDB_UC_PSMA267J	5	8	0.625	IBD	Lloyd-Price_2019
M00007	IBDMDB_UC_PSMA267J	8	8	1	IBD	Lloyd-Price_2019
M00008	IBDMDB_UC_PSMA267J	0	8	0	IBD	Lloyd-Price_2019
M00009	IBDMDB_UC_PSMA267J	0	8	0	IBD	Lloyd-Price_2019
M00010	IBDMDB_UC_PSMA267J	0	8	0	IBD	Lloyd-Price_2019
M00011	IBDMDB_UC_PSMA267J	2	8	0.25	IBD	Lloyd-Price_2019
M00012	IBDMDB_UC_PSMA267J	0	8	0	IBD	Lloyd-Price_2019
M00015	IBDMDB_UC_PSMA267J	10	8	1.25	IBD	Lloyd-Price_2019
M00016	IBDMDB_UC_PSMA267J	0	8	0	IBD	Lloyd-Price_2019
M00017	IBDMDB_UC_PSMA267J	0	8	0	IBD	Lloyd-Price_2019
M00018	IBDMDB_UC_PSMA267J	7	8	0.875	IBD	Lloyd-Price_2019
M00019	IBDMDB_UC_PSMA267J	10	8	1.25	IBD	Lloyd-Price_2019
M00020	IBDMDB_UC_PSMA267J	11	8	1.375	IBD	Lloyd-Price_2019
M00021	IBDMDB_UC_PSMA267J	13	8	1.625	IBD	Lloyd-Price_2019
M00022	IBDMDB_UC_PSMA267J	7	8	0.875	IBD	Lloyd-Price_2019
M00023	IBDMDB_UC_PSMA267J	7	8	0.875	IBD	Lloyd-Price_2019
M00024	IBDMDB_UC_PSMA267J	0	8	0	IBD	Lloyd-Price_2019
M00025	IBDMDB_UC_PSMA267J	0	8	0	IBD	Lloyd-Price_2019
M00026	IBDMDB_UC_PSMA267J	7	8	0.875	IBD	Lloyd-Price_2019
M00027	IBDMDB_UC_PSMA267J	0	8	0	IBD	Lloyd-Price_2019
M00028	IBDMDB_UC_PSMA267J	7	8	0.875	IBD	Lloyd-Price_2019
M00034	IBDMDB_UC_PSMA267J	0	8	0	IBD	Lloyd-Price_2019
M00035	IBDMDB_UC_PSMA267J	0	8	0	IBD	Lloyd-Price_2019
M00036	IBDMDB_UC_PSMA267J	0	8	0	IBD	Lloyd-Price_2019
M00040	IBDMDB_UC_PSMA267J	0	8	0	IBD	Lloyd-Price_2019
M00044	IBDMDB_UC_PSMA267J	0	8	0	IBD	Lloyd-Price_2019
M00045	IBDMDB_UC_PSMA267J	4	8	0.5	IBD	Lloyd-Price_2019
M00046	IBDMDB_UC_PSMA267J	1	8	0.125	IBD	Lloyd-Price_2019
M00048	IBDMDB_UC_PSMA267J	10	8	1.25	IBD	Lloyd-Price_2019
M00049	IBDMDB_UC_PSMA267J	11	8	1.375	IBD	Lloyd-Price_2019
M00050	IBDMDB_UC_PSMA267J	9	8	1.125	IBD	Lloyd-Price_2019
M00051	IBDMDB_UC_PSMA267J	11	8	1.375	IBD	Lloyd-Price_2019
M00052	IBDMDB_UC_PSMA267J	5	8	0.625	IBD	Lloyd-Price_2019
M00053	IBDMDB_UC_PSMA267J	0	8	0	IBD	Lloyd-Price_2019
M00060	IBDMDB_UC_PSMA267J	0	8	0	IBD	Lloyd-Price_2019
M00061	IBDMDB_UC_PSMA267J	0	8	0	IBD	Lloyd-Price_2019
M00063	IBDMDB_UC_PSMA267J	7	8	0.875	IBD	Lloyd-Price_2019
M00064	IBDMDB_UC_PSMA267J	0	8	0	IBD	Lloyd-Price_2019
M00082	IBDMDB_UC_PSMA267J	1	8	0.125	IBD	Lloyd-Price_2019
M00083	IBDMDB_UC_PSMA267J	13	8	1.625	IBD	Lloyd-Price_2019
M00086	IBDMDB_UC_PSMA267J	31	8	3.875	IBD	Lloyd-Price_2019
M00087	IBDMDB_UC_PSMA267J	0	8	0	IBD	Lloyd-Price_2019
M00088	IBDMDB_UC_PSMA267J	0	8	0	IBD	Lloyd-Price_2019
M00091	IBDMDB_UC_PSMA267J	0	8	0	IBD	Lloyd-Price_2019
M00093	IBDMDB_UC_PSMA267J	7	8	0.875	IBD	Lloyd-Price_2019
M00095	IBDMDB_UC_PSMA267J	0	8	0	IBD	Lloyd-Price_2019
M00096	IBDMDB_UC_PSMA267J	5	8	0.625	IBD	Lloyd-Price_2019
M00098	IBDMDB_UC_PSMA267J	1	8	0.125	IBD	Lloyd-Price_2019
M00115	IBDMDB_UC_PSMA267J	7	8	0.875	IBD	Lloyd-Price_2019
M00116	IBDMDB_UC_PSMA267J	0	8	0	IBD	Lloyd-Price_2019
M00117	IBDMDB_UC_PSMA267J	0	8	0	IBD	Lloyd-Price_2019
M00118	IBDMDB_UC_PSMA267J	0	8	0	IBD	Lloyd-Price_2019
M00119	IBDMDB_UC_PSMA267J	7	8	0.875	IBD	Lloyd-Price_2019
M00120	IBDMDB_UC_PSMA267J	12	8	1.5	IBD	Lloyd-Price_2019
M00121	IBDMDB_UC_PSMA267J	0	8	0	IBD	Lloyd-Price_2019
M00122	IBDMDB_UC_PSMA267J	7	8	0.875	IBD	Lloyd-Price_2019
M00123	IBDMDB_UC_PSMA267J	6	8	0.75	IBD	Lloyd-Price_2019
M00124	IBDMDB_UC_PSMA267J	0	8	0	IBD	Lloyd-Price_2019
M00125	IBDMDB_UC_PSMA267J	10	8	1.25	IBD	Lloyd-Price_2019
M00126	IBDMDB_UC_PSMA267J	9	8	1.125	IBD	Lloyd-Price_2019
M00127	IBDMDB_UC_PSMA267J	4	8	0.5	IBD	Lloyd-Price_2019
M00133	IBDMDB_UC_PSMA267J	1	8	0.125	IBD	Lloyd-Price_2019
M00134	IBDMDB_UC_PSMA267J	0	8	0	IBD	Lloyd-Price_2019
M00136	IBDMDB_UC_PSMA267J	0	8	0	IBD	Lloyd-Price_2019
M00140	IBDMDB_UC_PSMA267J	10	8	1.25	IBD	Lloyd-Price_2019
M00142	IBDMDB_UC_PSMA267J	0	8	0	IBD	Lloyd-Price_2019
M00144	IBDMDB_UC_PSMA267J	12	8	1.5	IBD	Lloyd-Price_2019
M00145	IBDMDB_UC_PSMA267J	0	8	0	IBD	Lloyd-Price_2019
M00149	IBDMDB_UC_PSMA267J	0	8	0	IBD	Lloyd-Price_2019
M00150	IBDMDB_UC_PSMA267J	0	8	0	IBD	Lloyd-Price_2019
M00151	IBDMDB_UC_PSMA267J	0	8	0	IBD	Lloyd-Price_2019
M00153	IBDMDB_UC_PSMA267J	0	8	0	IBD	Lloyd-Price_2019
M00155	IBDMDB_UC_PSMA267J	0	8	0	IBD	Lloyd-Price_2019
M00156	IBDMDB_UC_PSMA267J	0	8	0	IBD	Lloyd-Price_2019
M00157	IBDMDB_UC_PSMA267J	14	8	1.75	IBD	Lloyd-Price_2019
M00159	IBDMDB_UC_PSMA267J	5	8	0.625	IBD	Lloyd-Price_2019
M00161	IBDMDB_UC_PSMA267J	0	8	0	IBD	Lloyd-Price_2019
M00166	IBDMDB_UC_PSMA267J	0	8	0	IBD	Lloyd-Price_2019
M00168	IBDMDB_UC_PSMA267J	0	8	0	IBD	Lloyd-Price_2019
M00169	IBDMDB_UC_PSMA267J	7	8	0.875	IBD	Lloyd-Price_2019
M00175	IBDMDB_UC_PSMA267J	0	8	0	IBD	Lloyd-Price_2019
M00176	IBDMDB_UC_PSMA267J	0	8	0	IBD	Lloyd-Price_2019
M00307	IBDMDB_UC_PSMA267J	13	8	1.625	IBD	Lloyd-Price_2019
M00308	IBDMDB_UC_PSMA267J	0	8	0	IBD	Lloyd-Price_2019
M00338	IBDMDB_UC_PSMA267J	0	8	0	IBD	Lloyd-Price_2019
M00345	IBDMDB_UC_PSMA267J	0	8	0	IBD	Lloyd-Price_2019
M00356	IBDMDB_UC_PSMA267J	0	8	0	IBD	Lloyd-Price_2019
M00357	IBDMDB_UC_PSMA267J	0	8	0	IBD	Lloyd-Price_2019
M00358	IBDMDB_UC_PSMA267J	0	8	0	IBD	Lloyd-Price_2019
M00363	IBDMDB_UC_PSMA267J	0	8	0	IBD	Lloyd-Price_2019
M00364	IBDMDB_UC_PSMA267J	4	8	0.5	IBD	Lloyd-Price_2019
M00365	IBDMDB_UC_PSMA267J	4	8	0.5	IBD	Lloyd-Price_2019
M00417	IBDMDB_UC_PSMA267J	0	8	0	IBD	Lloyd-Price_2019
M00432	IBDMDB_UC_PSMA267J	9	8	1.125	IBD	Lloyd-Price_2019
M00525	IBDMDB_UC_PSMA267J	0	8	0	IBD	Lloyd-Price_2019
M00526	IBDMDB_UC_PSMA267J	6	8	0.75	IBD	Lloyd-Price_2019
M00527	IBDMDB_UC_PSMA267J	10	8	1.25	IBD	Lloyd-Price_2019
M00529	IBDMDB_UC_PSMA267J	0	8	0	IBD	Lloyd-Price_2019
M00530	IBDMDB_UC_PSMA267J	1	8	0.125	IBD	Lloyd-Price_2019
M00533	IBDMDB_UC_PSMA267J	0	8	0	IBD	Lloyd-Price_2019
M00535	IBDMDB_UC_PSMA267J	7	8	0.875	IBD	Lloyd-Price_2019
M00545	IBDMDB_UC_PSMA267J	0	8	0	IBD	Lloyd-Price_2019
M00546	IBDMDB_UC_PSMA267J	0	8	0	IBD	Lloyd-Price_2019
M00549	IBDMDB_UC_PSMA267J	3	8	0.375	IBD	Lloyd-Price_2019
M00550	IBDMDB_UC_PSMA267J	0	8	0	IBD	Lloyd-Price_2019
M00551	IBDMDB_UC_PSMA267J	0	8	0	IBD	Lloyd-Price_2019
M00552	IBDMDB_UC_PSMA267J	0	8	0	IBD	Lloyd-Price_2019
M00554	IBDMDB_UC_PSMA267J	0	8	0	IBD	Lloyd-Price_2019
M00555	IBDMDB_UC_PSMA267J	0	8	0	IBD	Lloyd-Price_2019
M00563	IBDMDB_UC_PSMA267J	0	8	0	IBD	Lloyd-Price_2019
M00565	IBDMDB_UC_PSMA267J	0	8	0	IBD	Lloyd-Price_2019
M00567	IBDMDB_UC_PSMA267J	0	8	0	IBD	Lloyd-Price_2019
M00568	IBDMDB_UC_PSMA267J	0	8	0	IBD	Lloyd-Price_2019
M00569	IBDMDB_UC_PSMA267J	0	8	0	IBD	Lloyd-Price_2019
M00570	IBDMDB_UC_PSMA267J	7	8	0.875	IBD	Lloyd-Price_2019
M00572	IBDMDB_UC_PSMA267J	7	8	0.875	IBD	Lloyd-Price_2019
M00577	IBDMDB_UC_PSMA267J	0	8	0	IBD	Lloyd-Price_2019
M00579	IBDMDB_UC_PSMA267J	2	8	0.25	IBD	Lloyd-Price_2019
M00580	IBDMDB_UC_PSMA267J	0	8	0	IBD	Lloyd-Price_2019
M00595	IBDMDB_UC_PSMA267J	0	8	0	IBD	Lloyd-Price_2019
M00596	IBDMDB_UC_PSMA267J	0	8	0	IBD	Lloyd-Price_2019
M00608	IBDMDB_UC_PSMA267J	0	8	0	IBD	Lloyd-Price_2019
M00616	IBDMDB_UC_PSMA267J	0	8	0	IBD	Lloyd-Price_2019
M00617	IBDMDB_UC_PSMA267J	0	8	0	IBD	Lloyd-Price_2019
M00620	IBDMDB_UC_PSMA267J	0	8	0	IBD	Lloyd-Price_2019
M00622	IBDMDB_UC_PSMA267J	0	8	0	IBD	Lloyd-Price_2019
M00627	IBDMDB_UC_PSMA267J	10	8	1.25	IBD	Lloyd-Price_2019
M00631	IBDMDB_UC_PSMA267J	7	8	0.875	IBD	Lloyd-Price_2019
M00632	IBDMDB_UC_PSMA267J	0	8	0	IBD	Lloyd-Price_2019
M00637	IBDMDB_UC_PSMA267J	0	8	0	IBD	Lloyd-Price_2019
M00641	IBDMDB_UC_PSMA267J	0	8	0	IBD	Lloyd-Price_2019
M00642	IBDMDB_UC_PSMA267J	0	8	0	IBD	Lloyd-Price_2019
M00649	IBDMDB_UC_PSMA267J	0	8	0	IBD	Lloyd-Price_2019
M00651	IBDMDB_UC_PSMA267J	6	8	0.75	IBD	Lloyd-Price_2019
M00652	IBDMDB_UC_PSMA267J	0	8	0	IBD	Lloyd-Price_2019
M00696	IBDMDB_UC_PSMA267J	0	8	0	IBD	Lloyd-Price_2019
M00697	IBDMDB_UC_PSMA267J	0	8	0	IBD	Lloyd-Price_2019
M00698	IBDMDB_UC_PSMA267J	0	8	0	IBD	Lloyd-Price_2019
M00700	IBDMDB_UC_PSMA267J	0	8	0	IBD	Lloyd-Price_2019
M00702	IBDMDB_UC_PSMA267J	0	8	0	IBD	Lloyd-Price_2019
M00705	IBDMDB_UC_PSMA267J	3	8	0.375	IBD	Lloyd-Price_2019
M00725	IBDMDB_UC_PSMA267J	0	8	0	IBD	Lloyd-Price_2019
M00741	IBDMDB_UC_PSMA267J	6	8	0.75	IBD	Lloyd-Price_2019
M00745	IBDMDB_UC_PSMA267J	0	8	0	IBD	Lloyd-Price_2019
M00761	IBDMDB_UC_PSMA267J	0	8	0	IBD	Lloyd-Price_2019
M00793	IBDMDB_UC_PSMA267J	11	8	1.375	IBD	Lloyd-Price_2019
M00844	IBDMDB_UC_PSMA267J	8	8	1	IBD	Lloyd-Price_2019
M00846	IBDMDB_UC_PSMA267J	0	8	0	IBD	Lloyd-Price_2019
M00847	IBDMDB_UC_PSMA267J	0	8	0	IBD	Lloyd-Price_2019
M00854	IBDMDB_UC_PSMA267J	9	8	1.125	IBD	Lloyd-Price_2019
M00855	IBDMDB_UC_PSMA267J	11	8	1.375	IBD	Lloyd-Price_2019
M00866	IBDMDB_UC_PSMA267J	0	8	0	IBD	Lloyd-Price_2019
M00877	IBDMDB_UC_PSMA267J	0	8	0	IBD	Lloyd-Price_2019
M00878	IBDMDB_UC_PSMA267J	0	8	0	IBD	Lloyd-Price_2019
M00879	IBDMDB_UC_PSMA267J	0	8	0	IBD	Lloyd-Price_2019
M00880	IBDMDB_UC_PSMA267J	1	8	0.125	IBD	Lloyd-Price_2019
M00881	IBDMDB_UC_PSMA267J	7	8	0.875	IBD	Lloyd-Price_2019
M00882	IBDMDB_UC_PSMA267J	0	8	0	IBD	Lloyd-Price_2019
M00883	IBDMDB_UC_PSMA267J	0	8	0	IBD	Lloyd-Price_2019
M00895	IBDMDB_UC_PSMA267J	0	8	0	IBD	Lloyd-Price_2019
M00896	IBDMDB_UC_PSMA267J	1	8	0.125	IBD	Lloyd-Price_2019
M00899	IBDMDB_UC_PSMA267J	3	8	0.375	IBD	Lloyd-Price_2019
M00909	IBDMDB_UC_PSMA267J	3	8	0.375	IBD	Lloyd-Price_2019
M00914	IBDMDB_UC_PSMA267J	0	8	0	IBD	Lloyd-Price_2019
M00916	IBDMDB_UC_PSMA267J	2	8	0.25	IBD	Lloyd-Price_2019
M00918	IBDMDB_UC_PSMA267J	0	8	0	IBD	Lloyd-Price_2019
M00922	IBDMDB_UC_PSMA267J	0	8	0	IBD	Lloyd-Price_2019
M00923	IBDMDB_UC_PSMA267J	0	8	0	IBD	Lloyd-Price_2019
M00924	IBDMDB_UC_PSMA267J	0	8	0	IBD	Lloyd-Price_2019
M00925	IBDMDB_UC_PSMA267J	0	8	0	IBD	Lloyd-Price_2019
M00926	IBDMDB_UC_PSMA267J	0	8	0	IBD	Lloyd-Price_2019
M00930	IBDMDB_UC_PSMA267J	0	8	0	IBD	Lloyd-Price_2019
M00931	IBDMDB_UC_PSMA267J	0	8	0	IBD	Lloyd-Price_2019
M00935	IBDMDB_UC_PSMA267J	0	8	0	IBD	Lloyd-Price_2019
M00001	G48777_CD	28	28	1	IBD	Franzosa_2018
M00002	G48777_CD	28	28	1	IBD	Franzosa_2018
M00003	G48777_CD	28	28	1	IBD	Franzosa_2018
M00004	G48777_CD	11	28	0.392857	IBD	Franzosa_2018
M00005	G48777_CD	51	28	1.82143	IBD	Franzosa_2018
M00006	G48777_CD	11	28	0.392857	IBD	Franzosa_2018
M00007	G48777_CD	29	28	1.03571	IBD	Franzosa_2018
M00008	G48777_CD	0	28	0	IBD	Franzosa_2018
M00009	G48777_CD	3	28	0.107143	IBD	Franzosa_2018
M00010	G48777_CD	3	28	0.107143	IBD	Franzosa_2018
M00011	G48777_CD	9	28	0.321429	IBD	Franzosa_2018
M00012	G48777_CD	1	28	0.0357143	IBD	Franzosa_2018
M00015	G48777_CD	30	28	1.07143	IBD	Franzosa_2018
M00016	G48777_CD	4	28	0.142857	IBD	Franzosa_2018
M00017	G48777_CD	4	28	0.142857	IBD	Franzosa_2018
M00018	G48777_CD	16	28	0.571429	IBD	Franzosa_2018
M00019	G48777_CD	27	28	0.964286	IBD	Franzosa_2018
M00020	G48777_CD	24	28	0.857143	IBD	Franzosa_2018
M00021	G48777_CD	34	28	1.21429	IBD	Franzosa_2018
M00022	G48777_CD	32	28	1.14286	IBD	Franzosa_2018
M00023	G48777_CD	22	28	0.785714	IBD	Franzosa_2018
M00024	G48777_CD	2	28	0.0714286	IBD	Franzosa_2018
M00025	G48777_CD	2	28	0.0714286	IBD	Franzosa_2018
M00026	G48777_CD	23	28	0.821429	IBD	Franzosa_2018
M00027	G48777_CD	1	28	0.0357143	IBD	Franzosa_2018
M00028	G48777_CD	30	28	1.07143	IBD	Franzosa_2018
M00034	G48777_CD	1	28	0.0357143	IBD	Franzosa_2018
M00035	G48777_CD	4	28	0.142857	IBD	Franzosa_2018
M00036	G48777_CD	0	28	0	IBD	Franzosa_2018
M00040	G48777_CD	0	28	0	IBD	Franzosa_2018
M00044	G48777_CD	0	28	0	IBD	Franzosa_2018
M00045	G48777_CD	10	28	0.357143	IBD	Franzosa_2018
M00046	G48777_CD	1	28	0.0357143	IBD	Franzosa_2018
M00048	G48777_CD	32	28	1.14286	IBD	Franzosa_2018
M00049	G48777_CD	32	28	1.14286	IBD	Franzosa_2018
M00050	G48777_CD	30	28	1.07143	IBD	Franzosa_2018
M00051	G48777_CD	33	28	1.17857	IBD	Franzosa_2018
M00052	G48777_CD	11	28	0.392857	IBD	Franzosa_2018
M00053	G48777_CD	10	28	0.357143	IBD	Franzosa_2018
M00060	G48777_CD	0	28	0	IBD	Franzosa_2018
M00061	G48777_CD	9	28	0.321429	IBD	Franzosa_2018
M00063	G48777_CD	14	28	0.5	IBD	Franzosa_2018
M00064	G48777_CD	4	28	0.142857	IBD	Franzosa_2018
M00082	G48777_CD	20	28	0.714286	IBD	Franzosa_2018
M00083	G48777_CD	50	28	1.78571	IBD	Franzosa_2018
M00086	G48777_CD	45	28	1.60714	IBD	Franzosa_2018
M00087	G48777_CD	2	28	0.0714286	IBD	Franzosa_2018
M00088	G48777_CD	0	28	0	IBD	Franzosa_2018
M00091	G48777_CD	1	28	0.0357143	IBD	Franzosa_2018
M00093	G48777_CD	17	28	0.607143	IBD	Franzosa_2018
M00095	G48777_CD	0	28	0	IBD	Franzosa_2018
M00096	G48777_CD	16	28	0.571429	IBD	Franzosa_2018
M00098	G48777_CD	4	28	0.142857	IBD	Franzosa_2018
M00115	G48777_CD	24	28	0.857143	IBD	Franzosa_2018
M00116	G48777_CD	1	28	0.0357143	IBD	Franzosa_2018
M00117	G48777_CD	1	28	0.0357143	IBD	Franzosa_2018
M00118	G48777_CD	0	28	0	IBD	Franzosa_2018
M00119	G48777_CD	15	28	0.535714	IBD	Franzosa_2018
M00120	G48777_CD	30	28	1.07143	IBD	Franzosa_2018
M00121	G48777_CD	4	28	0.142857	IBD	Franzosa_2018
M00122	G48777_CD	14	28	0.5	IBD	Franzosa_2018
M00123	G48777_CD	13	28	0.464286	IBD	Franzosa_2018
M00124	G48777_CD	1	28	0.0357143	IBD	Franzosa_2018
M00125	G48777_CD	18	28	0.642857	IBD	Franzosa_2018
M00126	G48777_CD	20	28	0.714286	IBD	Franzosa_2018
M00127	G48777_CD	13	28	0.464286	IBD	Franzosa_2018
M00133	G48777_CD	7	28	0.25	IBD	Franzosa_2018
M00134	G48777_CD	0	28	0	IBD	Franzosa_2018
M00136	G48777_CD	0	28	0	IBD	Franzosa_2018
M00140	G48777_CD	29	28	1.03571	IBD	Franzosa_2018
M00142	G48777_CD	0	28	0	IBD	Franzosa_2018
M00144	G48777_CD	14	28	0.5	IBD	Franzosa_2018
M00145	G48777_CD	0	28	0	IBD	Franzosa_2018
M00149	G48777_CD	2	28	0.0714286	IBD	Franzosa_2018
M00150	G48777_CD	1	28	0.0357143	IBD	Franzosa_2018
M00151	G48777_CD	0	28	0	IBD	Franzosa_2018
M00153	G48777_CD	1	28	0.0357143	IBD	Franzosa_2018
M00155	G48777_CD	0	28	0	IBD	Franzosa_2018
M00156	G48777_CD	0	28	0	IBD	Franzosa_2018
M00157	G48777_CD	33	28	1.17857	IBD	Franzosa_2018
M00159	G48777_CD	7	28	0.25	IBD	Franzosa_2018
M00161	G48777_CD	0	28	0	IBD	Franzosa_2018
M00166	G48777_CD	1	28	0.0357143	IBD	Franzosa_2018
M00168	G48777_CD	7	28	0.25	IBD	Franzosa_2018
M00169	G48777_CD	12	28	0.428571	IBD	Franzosa_2018
M00175	G48777_CD	1	28	0.0357143	IBD	Franzosa_2018
M00176	G48777_CD	1	28	0.0357143	IBD	Franzosa_2018
M00307	G48777_CD	44	28	1.57143	IBD	Franzosa_2018
M00308	G48777_CD	1	28	0.0357143	IBD	Franzosa_2018
M00338	G48777_CD	0	28	0	IBD	Franzosa_2018
M00345	G48777_CD	0	28	0	IBD	Franzosa_2018
M00356	G48777_CD	0	28	0	IBD	Franzosa_2018
M00357	G48777_CD	0	28	0	IBD	Franzosa_2018
M00358	G48777_CD	0	28	0	IBD	Franzosa_2018
M00363	G48777_CD	0	28	0	IBD	Franzosa_2018
M00364	G48777_CD	11	28	0.392857	IBD	Franzosa_2018
M00365	G48777_CD	6	28	0.214286	IBD	Franzosa_2018
M00417	G48777_CD	1	28	0.0357143	IBD	Franzosa_2018
M00432	G48777_CD	30	28	1.07143	IBD	Franzosa_2018
M00525	G48777_CD	0	28	0	IBD	Franzosa_2018
M00526	G48777_CD	24	28	0.857143	IBD	Franzosa_2018
M00527	G48777_CD	29	28	1.03571	IBD	Franzosa_2018
M00529	G48777_CD	0	28	0	IBD	Franzosa_2018
M00530	G48777_CD	6	28	0.214286	IBD	Franzosa_2018
M00533	G48777_CD	0	28	0	IBD	Franzosa_2018
M00535	G48777_CD	7	28	0.25	IBD	Franzosa_2018
M00545	G48777_CD	0	28	0	IBD	Franzosa_2018
M00546	G48777_CD	0	28	0	IBD	Franzosa_2018
M00549	G48777_CD	11	28	0.392857	IBD	Franzosa_2018
M00550	G48777_CD	1	28	0.0357143	IBD	Franzosa_2018
M00551	G48777_CD	1	28	0.0357143	IBD	Franzosa_2018
M00552	G48777_CD	2	28	0.0714286	IBD	Franzosa_2018
M00554	G48777_CD	3	28	0.107143	IBD	Franzosa_2018
M00555	G48777_CD	0	28	0	IBD	Franzosa_2018
M00563	G48777_CD	0	28	0	IBD	Franzosa_2018
M00565	G48777_CD	0	28	0	IBD	Franzosa_2018
M00567	G48777_CD	0	28	0	IBD	Franzosa_2018
M00568	G48777_CD	0	28	0	IBD	Franzosa_2018
M00569	G48777_CD	0	28	0	IBD	Franzosa_2018
M00570	G48777_CD	27	28	0.964286	IBD	Franzosa_2018
M00572	G48777_CD	7	28	0.25	IBD	Franzosa_2018
M00577	G48777_CD	2	28	0.0714286	IBD	Franzosa_2018
M00579	G48777_CD	23	28	0.821429	IBD	Franzosa_2018
M00580	G48777_CD	0	28	0	IBD	Franzosa_2018
M00595	G48777_CD	0	28	0	IBD	Franzosa_2018
M00596	G48777_CD	0	28	0	IBD	Franzosa_2018
M00608	G48777_CD	0	28	0	IBD	Franzosa_2018
M00616	G48777_CD	1	28	0.0357143	IBD	Franzosa_2018
M00617	G48777_CD	0	28	0	IBD	Franzosa_2018
M00620	G48777_CD	0	28	0	IBD	Franzosa_2018
M00622	G48777_CD	0	28	0	IBD	Franzosa_2018
M00627	G48777_CD	21	28	0.75	IBD	Franzosa_2018
M00631	G48777_CD	17	28	0.607143	IBD	Franzosa_2018
M00632	G48777_CD	3	28	0.107143	IBD	Franzosa_2018
M00637	G48777_CD	0	28	0	IBD	Franzosa_2018
M00641	G48777_CD	0	28	0	IBD	Franzosa_2018
M00642	G48777_CD	0	28	0	IBD	Franzosa_2018
M00649	G48777_CD	0	28	0	IBD	Franzosa_2018
M00651	G48777_CD	5	28	0.178571	IBD	Franzosa_2018
M00652	G48777_CD	1	28	0.0357143	IBD	Franzosa_2018
M00696	G48777_CD	1	28	0.0357143	IBD	Franzosa_2018
M00697	G48777_CD	1	28	0.0357143	IBD	Franzosa_2018
M00698	G48777_CD	0	28	0	IBD	Franzosa_2018
M00700	G48777_CD	0	28	0	IBD	Franzosa_2018
M00702	G48777_CD	1	28	0.0357143	IBD	Franzosa_2018
M00705	G48777_CD	18	28	0.642857	IBD	Franzosa_2018
M00725	G48777_CD	0	28	0	IBD	Franzosa_2018
M00741	G48777_CD	9	28	0.321429	IBD	Franzosa_2018
M00745	G48777_CD	1	28	0.0357143	IBD	Franzosa_2018
M00761	G48777_CD	0	28	0	IBD	Franzosa_2018
M00793	G48777_CD	34	28	1.21429	IBD	Franzosa_2018
M00844	G48777_CD	28	28	1	IBD	Franzosa_2018
M00846	G48777_CD	10	28	0.357143	IBD	Franzosa_2018
M00847	G48777_CD	1	28	0.0357143	IBD	Franzosa_2018
M00854	G48777_CD	38	28	1.35714	IBD	Franzosa_2018
M00855	G48777_CD	16	28	0.571429	IBD	Franzosa_2018
M00866	G48777_CD	1	28	0.0357143	IBD	Franzosa_2018
M00877	G48777_CD	0	28	0	IBD	Franzosa_2018
M00878	G48777_CD	0	28	0	IBD	Franzosa_2018
M00879	G48777_CD	0	28	0	IBD	Franzosa_2018
M00880	G48777_CD	3	28	0.107143	IBD	Franzosa_2018
M00881	G48777_CD	8	28	0.285714	IBD	Franzosa_2018
M00882	G48777_CD	0	28	0	IBD	Franzosa_2018
M00883	G48777_CD	0	28	0	IBD	Franzosa_2018
M00895	G48777_CD	0	28	0	IBD	Franzosa_2018
M00896	G48777_CD	1	28	0.0357143	IBD	Franzosa_2018
M00899	G48777_CD	26	28	0.928571	IBD	Franzosa_2018
M00909	G48777_CD	11	28	0.392857	IBD	Franzosa_2018
M00914	G48777_CD	0	28	0	IBD	Franzosa_2018
M00916	G48777_CD	11	28	0.392857	IBD	Franzosa_2018
M00918	G48777_CD	0	28	0	IBD	Franzosa_2018
M00922	G48777_CD	0	28	0	IBD	Franzosa_2018
M00923	G48777_CD	0	28	0	IBD	Franzosa_2018
M00924	G48777_CD	15	28	0.535714	IBD	Franzosa_2018
M00925	G48777_CD	0	28	0	IBD	Franzosa_2018
M00926	G48777_CD	1	28	0.0357143	IBD	Franzosa_2018
M00930	G48777_CD	1	28	0.0357143	IBD	Franzosa_2018
M00931	G48777_CD	0	28	0	IBD	Franzosa_2018
M00935	G48777_CD	0	28	0	IBD	Franzosa_2018
M00001	G48780_CD	42	41	1.02439	IBD	Franzosa_2018
M00002	G48780_CD	43	41	1.04878	IBD	Franzosa_2018
M00003	G48780_CD	28	41	0.682927	IBD	Franzosa_2018
M00004	G48780_CD	9	41	0.219512	IBD	Franzosa_2018
M00005	G48780_CD	59	41	1.43902	IBD	Franzosa_2018
M00006	G48780_CD	9	41	0.219512	IBD	Franzosa_2018
M00007	G48780_CD	28	41	0.682927	IBD	Franzosa_2018
M00008	G48780_CD	1	41	0.0243902	IBD	Franzosa_2018
M00009	G48780_CD	8	41	0.195122	IBD	Franzosa_2018
M00010	G48780_CD	8	41	0.195122	IBD	Franzosa_2018
M00011	G48780_CD	8	41	0.195122	IBD	Franzosa_2018
M00012	G48780_CD	1	41	0.0243902	IBD	Franzosa_2018
M00015	G48780_CD	31	41	0.756098	IBD	Franzosa_2018
M00016	G48780_CD	5	41	0.121951	IBD	Franzosa_2018
M00017	G48780_CD	3	41	0.0731707	IBD	Franzosa_2018
M00018	G48780_CD	29	41	0.707317	IBD	Franzosa_2018
M00019	G48780_CD	34	41	0.829268	IBD	Franzosa_2018
M00020	G48780_CD	28	41	0.682927	IBD	Franzosa_2018
M00021	G48780_CD	39	41	0.95122	IBD	Franzosa_2018
M00022	G48780_CD	41	41	1	IBD	Franzosa_2018
M00023	G48780_CD	18	41	0.439024	IBD	Franzosa_2018
M00024	G48780_CD	1	41	0.0243902	IBD	Franzosa_2018
M00025	G48780_CD	1	41	0.0243902	IBD	Franzosa_2018
M00026	G48780_CD	22	41	0.536585	IBD	Franzosa_2018
M00027	G48780_CD	2	41	0.0487805	IBD	Franzosa_2018
M00028	G48780_CD	31	41	0.756098	IBD	Franzosa_2018
M00034	G48780_CD	0	41	0	IBD	Franzosa_2018
M00035	G48780_CD	2	41	0.0487805	IBD	Franzosa_2018
M00036	G48780_CD	0	41	0	IBD	Franzosa_2018
M00040	G48780_CD	0	41	0	IBD	Franzosa_2018
M00044	G48780_CD	0	41	0	IBD	Franzosa_2018
M00045	G48780_CD	8	41	0.195122	IBD	Franzosa_2018
M00046	G48780_CD	1	41	0.0243902	IBD	Franzosa_2018
M00048	G48780_CD	35	41	0.853659	IBD	Franzosa_2018
M00049	G48780_CD	35	41	0.853659	IBD	Franzosa_2018
M00050	G48780_CD	42	41	1.02439	IBD	Franzosa_2018
M00051	G48780_CD	42	41	1.02439	IBD	Franzosa_2018
M00052	G48780_CD	10	41	0.243902	IBD	Franzosa_2018
M00053	G48780_CD	10	41	0.243902	IBD	Franzosa_2018
M00060	G48780_CD	1	41	0.0243902	IBD	Franzosa_2018
M00061	G48780_CD	4	41	0.097561	IBD	Franzosa_2018
M00063	G48780_CD	9	41	0.219512	IBD	Franzosa_2018
M00064	G48780_CD	3	41	0.0731707	IBD	Franzosa_2018
M00082	G48780_CD	25	41	0.609756	IBD	Franzosa_2018
M00083	G48780_CD	52	41	1.26829	IBD	Franzosa_2018
M00086	G48780_CD	44	41	1.07317	IBD	Franzosa_2018
M00087	G48780_CD	3	41	0.0731707	IBD	Franzosa_2018
M00088	G48780_CD	1	41	0.0243902	IBD	Franzosa_2018
M00091	G48780_CD	2	41	0.0487805	IBD	Franzosa_2018
M00093	G48780_CD	17	41	0.414634	IBD	Franzosa_2018
M00095	G48780_CD	0	41	0	IBD	Franzosa_2018
M00096	G48780_CD	29	41	0.707317	IBD	Franzosa_2018
M00098	G48780_CD	10	41	0.243902	IBD	Franzosa_2018
M00115	G48780_CD	21	41	0.512195	IBD	Franzosa_2018
M00116	G48780_CD	2	41	0.0487805	IBD	Franzosa_2018
M00117	G48780_CD	1	41	0.0243902	IBD	Franzosa_2018
M00118	G48780_CD	1	41	0.0243902	IBD	Franzosa_2018
M00119	G48780_CD	20	41	0.487805	IBD	Franzosa_2018
M00120	G48780_CD	35	41	0.853659	IBD	Franzosa_2018
M00121	G48780_CD	7	41	0.170732	IBD	Franzosa_2018
M00122	G48780_CD	21	41	0.512195	IBD	Franzosa_2018
M00123	G48780_CD	10	41	0.243902	IBD	Franzosa_2018
M00124	G48780_CD	1	41	0.0243902	IBD	Franzosa_2018
M00125	G48780_CD	23	41	0.560976	IBD	Franzosa_2018
M00126	G48780_CD	22	41	0.536585	IBD	Franzosa_2018
M00127	G48780_CD	1	41	0.0243902	IBD	Franzosa_2018
M00133	G48780_CD	5	41	0.121951	IBD	Franzosa_2018
M00134	G48780_CD	0	41	0	IBD	Franzosa_2018
M00136	G48780_CD	1	41	0.0243902	IBD	Franzosa_2018
M00140	G48780_CD	38	41	0.926829	IBD	Franzosa_2018
M00142	G48780_CD	0	41	0	IBD	Franzosa_2018
M00144	G48780_CD	16	41	0.390244	IBD	Franzosa_2018
M00145	G48780_CD	0	41	0	IBD	Franzosa_2018
M00149	G48780_CD	2	41	0.0487805	IBD	Franzosa_2018
M00150	G48780_CD	1	41	0.0243902	IBD	Franzosa_2018
M00151	G48780_CD	0	41	0	IBD	Franzosa_2018
M00153	G48780_CD	2	41	0.0487805	IBD	Franzosa_2018
M00155	G48780_CD	0	41	0	IBD	Franzosa_2018
M00156	G48780_CD	0	41	0	IBD	Franzosa_2018
M00157	G48780_CD	37	41	0.902439	IBD	Franzosa_2018
M00159	G48780_CD	14	41	0.341463	IBD	Franzosa_2018
M00161	G48780_CD	0	41	0	IBD	Franzosa_2018
M00166	G48780_CD	1	41	0.0243902	IBD	Franzosa_2018
M00168	G48780_CD	11	41	0.268293	IBD	Franzosa_2018
M00169	G48780_CD	10	41	0.243902	IBD	Franzosa_2018
M00175	G48780_CD	0	41	0	IBD	Franzosa_2018
M00176	G48780_CD	1	41	0.0243902	IBD	Franzosa_2018
M00307	G48780_CD	59	41	1.43902	IBD	Franzosa_2018
M00308	G48780_CD	1	41	0.0243902	IBD	Franzosa_2018
M00338	G48780_CD	0	41	0	IBD	Franzosa_2018
M00345	G48780_CD	3	41	0.0731707	IBD	Franzosa_2018
M00356	G48780_CD	0	41	0	IBD	Franzosa_2018
M00357	G48780_CD	0	41	0	IBD	Franzosa_2018
M00358	G48780_CD	0	41	0	IBD	Franzosa_2018
M00363	G48780_CD	0	41	0	IBD	Franzosa_2018
M00364	G48780_CD	16	41	0.390244	IBD	Franzosa_2018
M00365	G48780_CD	8	41	0.195122	IBD	Franzosa_2018
M00417	G48780_CD	1	41	0.0243902	IBD	Franzosa_2018
M00432	G48780_CD	32	41	0.780488	IBD	Franzosa_2018
M00525	G48780_CD	1	41	0.0243902	IBD	Franzosa_2018
M00526	G48780_CD	17	41	0.414634	IBD	Franzosa_2018
M00527	G48780_CD	26	41	0.634146	IBD	Franzosa_2018
M00529	G48780_CD	0	41	0	IBD	Franzosa_2018
M00530	G48780_CD	4	41	0.097561	IBD	Franzosa_2018
M00533	G48780_CD	1	41	0.0243902	IBD	Franzosa_2018
M00535	G48780_CD	6	41	0.146341	IBD	Franzosa_2018
M00545	G48780_CD	1	41	0.0243902	IBD	Franzosa_2018
M00546	G48780_CD	0	41	0	IBD	Franzosa_2018
M00549	G48780_CD	21	41	0.512195	IBD	Franzosa_2018
M00550	G48780_CD	2	41	0.0487805	IBD	Franzosa_2018
M00551	G48780_CD	0	41	0	IBD	Franzosa_2018
M00552	G48780_CD	1	41	0.0243902	IBD	Franzosa_2018
M00554	G48780_CD	5	41	0.121951	IBD	Franzosa_2018
M00555	G48780_CD	1	41	0.0243902	IBD	Franzosa_2018
M00563	G48780_CD	0	41	0	IBD	Franzosa_2018
M00565	G48780_CD	0	41	0	IBD	Franzosa_2018
M00567	G48780_CD	0	41	0	IBD	Franzosa_2018
M00568	G48780_CD	0	41	0	IBD	Franzosa_2018
M00569	G48780_CD	0	41	0	IBD	Franzosa_2018
M00570	G48780_CD	27	41	0.658537	IBD	Franzosa_2018
M00572	G48780_CD	5	41	0.121951	IBD	Franzosa_2018
M00577	G48780_CD	1	41	0.0243902	IBD	Franzosa_2018
M00579	G48780_CD	28	41	0.682927	IBD	Franzosa_2018
M00580	G48780_CD	3	41	0.0731707	IBD	Franzosa_2018
M00595	G48780_CD	0	41	0	IBD	Franzosa_2018
M00596	G48780_CD	0	41	0	IBD	Franzosa_2018
M00608	G48780_CD	0	41	0	IBD	Franzosa_2018
M00616	G48780_CD	1	41	0.0243902	IBD	Franzosa_2018
M00617	G48780_CD	0	41	0	IBD	Franzosa_2018
M00620	G48780_CD	0	41	0	IBD	Franzosa_2018
M00622	G48780_CD	0	41	0	IBD	Franzosa_2018
M00627	G48780_CD	35	41	0.853659	IBD	Franzosa_2018
M00631	G48780_CD	8	41	0.195122	IBD	Franzosa_2018
M00632	G48780_CD	5	41	0.121951	IBD	Franzosa_2018
M00637	G48780_CD	0	41	0	IBD	Franzosa_2018
M00641	G48780_CD	0	41	0	IBD	Franzosa_2018
M00642	G48780_CD	0	41	0	IBD	Franzosa_2018
M00649	G48780_CD	0	41	0	IBD	Franzosa_2018
M00651	G48780_CD	13	41	0.317073	IBD	Franzosa_2018
M00652	G48780_CD	2	41	0.0487805	IBD	Franzosa_2018
M00696	G48780_CD	1	41	0.0243902	IBD	Franzosa_2018
M00697	G48780_CD	1	41	0.0243902	IBD	Franzosa_2018
M00698	G48780_CD	0	41	0	IBD	Franzosa_2018
M00700	G48780_CD	0	41	0	IBD	Franzosa_2018
M00702	G48780_CD	0	41	0	IBD	Franzosa_2018
M00705	G48780_CD	23	41	0.560976	IBD	Franzosa_2018
M00725	G48780_CD	0	41	0	IBD	Franzosa_2018
M00741	G48780_CD	9	41	0.219512	IBD	Franzosa_2018
M00745	G48780_CD	0	41	0	IBD	Franzosa_2018
M00761	G48780_CD	1	41	0.0243902	IBD	Franzosa_2018
M00793	G48780_CD	29	41	0.707317	IBD	Franzosa_2018
M00844	G48780_CD	37	41	0.902439	IBD	Franzosa_2018
M00846	G48780_CD	12	41	0.292683	IBD	Franzosa_2018
M00847	G48780_CD	1	41	0.0243902	IBD	Franzosa_2018
M00854	G48780_CD	46	41	1.12195	IBD	Franzosa_2018
M00855	G48780_CD	20	41	0.487805	IBD	Franzosa_2018
M00866	G48780_CD	1	41	0.0243902	IBD	Franzosa_2018
M00877	G48780_CD	0	41	0	IBD	Franzosa_2018
M00878	G48780_CD	1	41	0.0243902	IBD	Franzosa_2018
M00879	G48780_CD	1	41	0.0243902	IBD	Franzosa_2018
M00880	G48780_CD	1	41	0.0243902	IBD	Franzosa_2018
M00881	G48780_CD	8	41	0.195122	IBD	Franzosa_2018
M00882	G48780_CD	0	41	0	IBD	Franzosa_2018
M00883	G48780_CD	0	41	0	IBD	Franzosa_2018
M00895	G48780_CD	0	41	0	IBD	Franzosa_2018
M00896	G48780_CD	0	41	0	IBD	Franzosa_2018
M00899	G48780_CD	25	41	0.609756	IBD	Franzosa_2018
M00909	G48780_CD	15	41	0.365854	IBD	Franzosa_2018
M00914	G48780_CD	0	41	0	IBD	Franzosa_2018
M00916	G48780_CD	11	41	0.268293	IBD	Franzosa_2018
M00918	G48780_CD	0	41	0	IBD	Franzosa_2018
M00922	G48780_CD	0	41	0	IBD	Franzosa_2018
M00923	G48780_CD	0	41	0	IBD	Franzosa_2018
M00924	G48780_CD	15	41	0.365854	IBD	Franzosa_2018
M00925	G48780_CD	0	41	0	IBD	Franzosa_2018
M00926	G48780_CD	0	41	0	IBD	Franzosa_2018
M00930	G48780_CD	2	41	0.0487805	IBD	Franzosa_2018
M00931	G48780_CD	0	41	0	IBD	Franzosa_2018
M00935	G48780_CD	0	41	0	IBD	Franzosa_2018
M00001	G48784_UC	45	51	0.882353	IBD	Franzosa_2018
M00002	G48784_UC	45	51	0.882353	IBD	Franzosa_2018
M00003	G48784_UC	38	51	0.745098	IBD	Franzosa_2018
M00004	G48784_UC	8	51	0.156863	IBD	Franzosa_2018
M00005	G48784_UC	71	51	1.39216	IBD	Franzosa_2018
M00006	G48784_UC	8	51	0.156863	IBD	Franzosa_2018
M00007	G48784_UC	27	51	0.529412	IBD	Franzosa_2018
M00008	G48784_UC	0	51	0	IBD	Franzosa_2018
M00009	G48784_UC	2	51	0.0392157	IBD	Franzosa_2018
M00010	G48784_UC	2	51	0.0392157	IBD	Franzosa_2018
M00011	G48784_UC	6	51	0.117647	IBD	Franzosa_2018
M00012	G48784_UC	1	51	0.0196078	IBD	Franzosa_2018
M00015	G48784_UC	43	51	0.843137	IBD	Franzosa_2018
M00016	G48784_UC	7	51	0.137255	IBD	Franzosa_2018
M00017	G48784_UC	8	51	0.156863	IBD	Franzosa_2018
M00018	G48784_UC	42	51	0.823529	IBD	Franzosa_2018
M00019	G48784_UC	45	51	0.882353	IBD	Franzosa_2018
M00020	G48784_UC	34	51	0.666667	IBD	Franzosa_2018
M00021	G48784_UC	53	51	1.03922	IBD	Franzosa_2018
M00022	G48784_UC	55	51	1.07843	IBD	Franzosa_2018
M00023	G48784_UC	23	51	0.45098	IBD	Franzosa_2018
M00024	G48784_UC	0	51	0	IBD	Franzosa_2018
M00025	G48784_UC	0	51	0	IBD	Franzosa_2018
M00026	G48784_UC	31	51	0.607843	IBD	Franzosa_2018
M00027	G48784_UC	0	51	0	IBD	Franzosa_2018
M00028	G48784_UC	44	51	0.862745	IBD	Franzosa_2018
M00034	G48784_UC	0	51	0	IBD	Franzosa_2018
M00035	G48784_UC	3	51	0.0588235	IBD	Franzosa_2018
M00036	G48784_UC	0	51	0	IBD	Franzosa_2018
M00040	G48784_UC	0	51	0	IBD	Franzosa_2018
M00044	G48784_UC	0	51	0	IBD	Franzosa_2018
M00045	G48784_UC	10	51	0.196078	IBD	Franzosa_2018
M00046	G48784_UC	1	51	0.0196078	IBD	Franzosa_2018
M00048	G48784_UC	43	51	0.843137	IBD	Franzosa_2018
M00049	G48784_UC	51	51	1	IBD	Franzosa_2018
M00050	G48784_UC	52	51	1.01961	IBD	Franzosa_2018
M00051	G48784_UC	50	51	0.980392	IBD	Franzosa_2018
M00052	G48784_UC	8	51	0.156863	IBD	Franzosa_2018
M00053	G48784_UC	8	51	0.156863	IBD	Franzosa_2018
M00060	G48784_UC	1	51	0.0196078	IBD	Franzosa_2018
M00061	G48784_UC	6	51	0.117647	IBD	Franzosa_2018
M00063	G48784_UC	12	51	0.235294	IBD	Franzosa_2018
M00064	G48784_UC	2	51	0.0392157	IBD	Franzosa_2018
M00082	G48784_UC	26	51	0.509804	IBD	Franzosa_2018
M00083	G48784_UC	55	51	1.07843	IBD	Franzosa_2018
M00086	G48784_UC	39	51	0.764706	IBD	Franzosa_2018
M00087	G48784_UC	5	51	0.0980392	IBD	Franzosa_2018
M00088	G48784_UC	0	51	0	IBD	Franzosa_2018
M00091	G48784_UC	2	51	0.0392157	IBD	Franzosa_2018
M00093	G48784_UC	17	51	0.333333	IBD	Franzosa_2018
M00095	G48784_UC	0	51	0	IBD	Franzosa_2018
M00096	G48784_UC	27	51	0.529412	IBD	Franzosa_2018
M00098	G48784_UC	9	51	0.176471	IBD	Franzosa_2018
M00115	G48784_UC	27	51	0.529412	IBD	Franzosa_2018
M00116	G48784_UC	0	51	0	IBD	Franzosa_2018
M00117	G48784_UC	0	51	0	IBD	Franzosa_2018
M00118	G48784_UC	0	51	0	IBD	Franzosa_2018
M00119	G48784_UC	19	51	0.372549	IBD	Franzosa_2018
M00120	G48784_UC	40	51	0.784314	IBD	Franzosa_2018
M00121	G48784_UC	4	51	0.0784314	IBD	Franzosa_2018
M00122	G48784_UC	28	51	0.54902	IBD	Franzosa_2018
M00123	G48784_UC	10	51	0.196078	IBD	Franzosa_2018
M00124	G48784_UC	0	51	0	IBD	Franzosa_2018
M00125	G48784_UC	25	51	0.490196	IBD	Franzosa_2018
M00126	G48784_UC	23	51	0.45098	IBD	Franzosa_2018
M00127	G48784_UC	10	51	0.196078	IBD	Franzosa_2018
M00133	G48784_UC	6	51	0.117647	IBD	Franzosa_2018
M00134	G48784_UC	1	51	0.0196078	IBD	Franzosa_2018
M00136	G48784_UC	0	51	0	IBD	Franzosa_2018
M00140	G48784_UC	48	51	0.941176	IBD	Franzosa_2018
M00142	G48784_UC	0	51	0	IBD	Franzosa_2018
M00144	G48784_UC	10	51	0.196078	IBD	Franzosa_2018
M00145	G48784_UC	0	51	0	IBD	Franzosa_2018
M00149	G48784_UC	0	51	0	IBD	Franzosa_2018
M00150	G48784_UC	0	51	0	IBD	Franzosa_2018
M00151	G48784_UC	0	51	0	IBD	Franzosa_2018
M00153	G48784_UC	1	51	0.0196078	IBD	Franzosa_2018
M00155	G48784_UC	0	51	0	IBD	Franzosa_2018
M00156	G48784_UC	0	51	0	IBD	Franzosa_2018
M00157	G48784_UC	50	51	0.980392	IBD	Franzosa_2018
M00159	G48784_UC	13	51	0.254902	IBD	Franzosa_2018
M00161	G48784_UC	0	51	0	IBD	Franzosa_2018
M00166	G48784_UC	0	51	0	IBD	Franzosa_2018
M00168	G48784_UC	8	51	0.156863	IBD	Franzosa_2018
M00169	G48784_UC	8	51	0.156863	IBD	Franzosa_2018
M00175	G48784_UC	0	51	0	IBD	Franzosa_2018
M00176	G48784_UC	1	51	0.0196078	IBD	Franzosa_2018
M00307	G48784_UC	79	51	1.54902	IBD	Franzosa_2018
M00308	G48784_UC	0	51	0	IBD	Franzosa_2018
M00338	G48784_UC	0	51	0	IBD	Franzosa_2018
M00345	G48784_UC	0	51	0	IBD	Franzosa_2018
M00356	G48784_UC	0	51	0	IBD	Franzosa_2018
M00357	G48784_UC	0	51	0	IBD	Franzosa_2018
M00358	G48784_UC	0	51	0	IBD	Franzosa_2018
M00363	G48784_UC	0	51	0	IBD	Franzosa_2018
M00364	G48784_UC	24	51	0.470588	IBD	Franzosa_2018
M00365	G48784_UC	10	51	0.196078	IBD	Franzosa_2018
M00417	G48784_UC	0	51	0	IBD	Franzosa_2018
M00432	G48784_UC	35	51	0.686275	IBD	Franzosa_2018
M00525	G48784_UC	1	51	0.0196078	IBD	Franzosa_2018
M00526	G48784_UC	22	51	0.431373	IBD	Franzosa_2018
M00527	G48784_UC	37	51	0.72549	IBD	Franzosa_2018
M00529	G48784_UC	0	51	0	IBD	Franzosa_2018
M00530	G48784_UC	3	51	0.0588235	IBD	Franzosa_2018
M00533	G48784_UC	0	51	0	IBD	Franzosa_2018
M00535	G48784_UC	4	51	0.0784314	IBD	Franzosa_2018
M00545	G48784_UC	0	51	0	IBD	Franzosa_2018
M00546	G48784_UC	0	51	0	IBD	Franzosa_2018
M00549	G48784_UC	22	51	0.431373	IBD	Franzosa_2018
M00550	G48784_UC	1	51	0.0196078	IBD	Franzosa_2018
M00551	G48784_UC	0	51	0	IBD	Franzosa_2018
M00552	G48784_UC	1	51	0.0196078	IBD	Franzosa_2018
M00554	G48784_UC	7	51	0.137255	IBD	Franzosa_2018
M00555	G48784_UC	0	51	0	IBD	Franzosa_2018
M00563	G48784_UC	0	51	0	IBD	Franzosa_2018
M00565	G48784_UC	0	51	0	IBD	Franzosa_2018
M00567	G48784_UC	0	51	0	IBD	Franzosa_2018
M00568	G48784_UC	0	51	0	IBD	Franzosa_2018
M00569	G48784_UC	0	51	0	IBD	Franzosa_2018
M00570	G48784_UC	40	51	0.784314	IBD	Franzosa_2018
M00572	G48784_UC	3	51	0.0588235	IBD	Franzosa_2018
M00577	G48784_UC	2	51	0.0392157	IBD	Franzosa_2018
M00579	G48784_UC	33	51	0.647059	IBD	Franzosa_2018
M00580	G48784_UC	0	51	0	IBD	Franzosa_2018
M00595	G48784_UC	0	51	0	IBD	Franzosa_2018
M00596	G48784_UC	0	51	0	IBD	Franzosa_2018
M00608	G48784_UC	0	51	0	IBD	Franzosa_2018
M00616	G48784_UC	1	51	0.0196078	IBD	Franzosa_2018
M00617	G48784_UC	0	51	0	IBD	Franzosa_2018
M00620	G48784_UC	0	51	0	IBD	Franzosa_2018
M00622	G48784_UC	0	51	0	IBD	Franzosa_2018
M00627	G48784_UC	30	51	0.588235	IBD	Franzosa_2018
M00631	G48784_UC	21	51	0.411765	IBD	Franzosa_2018
M00632	G48784_UC	7	51	0.137255	IBD	Franzosa_2018
M00637	G48784_UC	0	51	0	IBD	Franzosa_2018
M00641	G48784_UC	0	51	0	IBD	Franzosa_2018
M00642	G48784_UC	0	51	0	IBD	Franzosa_2018
M00649	G48784_UC	0	51	0	IBD	Franzosa_2018
M00651	G48784_UC	10	51	0.196078	IBD	Franzosa_2018
M00652	G48784_UC	2	51	0.0392157	IBD	Franzosa_2018
M00696	G48784_UC	0	51	0	IBD	Franzosa_2018
M00697	G48784_UC	1	51	0.0196078	IBD	Franzosa_2018
M00698	G48784_UC	0	51	0	IBD	Franzosa_2018
M00700	G48784_UC	1	51	0.0196078	IBD	Franzosa_2018
M00702	G48784_UC	0	51	0	IBD	Franzosa_2018
M00705	G48784_UC	32	51	0.627451	IBD	Franzosa_2018
M00725	G48784_UC	0	51	0	IBD	Franzosa_2018
M00741	G48784_UC	10	51	0.196078	IBD	Franzosa_2018
M00745	G48784_UC	0	51	0	IBD	Franzosa_2018
M00761	G48784_UC	1	51	0.0196078	IBD	Franzosa_2018
M00793	G48784_UC	40	51	0.784314	IBD	Franzosa_2018
M00844	G48784_UC	51	51	1	IBD	Franzosa_2018
M00846	G48784_UC	14	51	0.27451	IBD	Franzosa_2018
M00847	G48784_UC	2	51	0.0392157	IBD	Franzosa_2018
M00854	G48784_UC	72	51	1.41176	IBD	Franzosa_2018
M00855	G48784_UC	17	51	0.333333	IBD	Franzosa_2018
M00866	G48784_UC	1	51	0.0196078	IBD	Franzosa_2018
M00877	G48784_UC	0	51	0	IBD	Franzosa_2018
M00878	G48784_UC	0	51	0	IBD	Franzosa_2018
M00879	G48784_UC	0	51	0	IBD	Franzosa_2018
M00880	G48784_UC	4	51	0.0784314	IBD	Franzosa_2018
M00881	G48784_UC	6	51	0.117647	IBD	Franzosa_2018
M00882	G48784_UC	0	51	0	IBD	Franzosa_2018
M00883	G48784_UC	0	51	0	IBD	Franzosa_2018
M00895	G48784_UC	0	51	0	IBD	Franzosa_2018
M00896	G48784_UC	1	51	0.0196078	IBD	Franzosa_2018
M00899	G48784_UC	37	51	0.72549	IBD	Franzosa_2018
M00909	G48784_UC	25	51	0.490196	IBD	Franzosa_2018
M00914	G48784_UC	0	51	0	IBD	Franzosa_2018
M00916	G48784_UC	21	51	0.411765	IBD	Franzosa_2018
M00918	G48784_UC	0	51	0	IBD	Franzosa_2018
M00922	G48784_UC	0	51	0	IBD	Franzosa_2018
M00923	G48784_UC	0	51	0	IBD	Franzosa_2018
M00924	G48784_UC	17	51	0.333333	IBD	Franzosa_2018
M00925	G48784_UC	0	51	0	IBD	Franzosa_2018
M00926	G48784_UC	0	51	0	IBD	Franzosa_2018
M00930	G48784_UC	2	51	0.0392157	IBD	Franzosa_2018
M00931	G48784_UC	0	51	0	IBD	Franzosa_2018
M00935	G48784_UC	0	51	0	IBD	Franzosa_2018
M00001	G48791_UC	73	74	0.986486	IBD	Franzosa_2018
M00002	G48791_UC	73	74	0.986486	IBD	Franzosa_2018
M00003	G48791_UC	53	74	0.716216	IBD	Franzosa_2018
M00004	G48791_UC	18	74	0.243243	IBD	Franzosa_2018
M00005	G48791_UC	99	74	1.33784	IBD	Franzosa_2018
M00006	G48791_UC	18	74	0.243243	IBD	Franzosa_2018
M00007	G48791_UC	38	74	0.513514	IBD	Franzosa_2018
M00008	G48791_UC	0	74	0	IBD	Franzosa_2018
M00009	G48791_UC	3	74	0.0405405	IBD	Franzosa_2018
M00010	G48791_UC	3	74	0.0405405	IBD	Franzosa_2018
M00011	G48791_UC	6	74	0.0810811	IBD	Franzosa_2018
M00012	G48791_UC	0	74	0	IBD	Franzosa_2018
M00015	G48791_UC	60	74	0.810811	IBD	Franzosa_2018
M00016	G48791_UC	7	74	0.0945946	IBD	Franzosa_2018
M00017	G48791_UC	5	74	0.0675676	IBD	Franzosa_2018
M00018	G48791_UC	42	74	0.567568	IBD	Franzosa_2018
M00019	G48791_UC	53	74	0.716216	IBD	Franzosa_2018
M00020	G48791_UC	42	74	0.567568	IBD	Franzosa_2018
M00021	G48791_UC	76	74	1.02703	IBD	Franzosa_2018
M00022	G48791_UC	72	74	0.972973	IBD	Franzosa_2018
M00023	G48791_UC	38	74	0.513514	IBD	Franzosa_2018
M00024	G48791_UC	0	74	0	IBD	Franzosa_2018
M00025	G48791_UC	0	74	0	IBD	Franzosa_2018
M00026	G48791_UC	46	74	0.621622	IBD	Franzosa_2018
M00027	G48791_UC	0	74	0	IBD	Franzosa_2018
M00028	G48791_UC	62	74	0.837838	IBD	Franzosa_2018
M00034	G48791_UC	0	74	0	IBD	Franzosa_2018
M00035	G48791_UC	1	74	0.0135135	IBD	Franzosa_2018
M00036	G48791_UC	0	74	0	IBD	Franzosa_2018
M00040	G48791_UC	0	74	0	IBD	Franzosa_2018
M00044	G48791_UC	0	74	0	IBD	Franzosa_2018
M00045	G48791_UC	16	74	0.216216	IBD	Franzosa_2018
M00046	G48791_UC	1	74	0.0135135	IBD	Franzosa_2018
M00048	G48791_UC	64	74	0.864865	IBD	Franzosa_2018
M00049	G48791_UC	82	74	1.10811	IBD	Franzosa_2018
M00050	G48791_UC	76	74	1.02703	IBD	Franzosa_2018
M00051	G48791_UC	73	74	0.986486	IBD	Franzosa_2018
M00052	G48791_UC	13	74	0.175676	IBD	Franzosa_2018
M00053	G48791_UC	7	74	0.0945946	IBD	Franzosa_2018
M00060	G48791_UC	0	74	0	IBD	Franzosa_2018
M00061	G48791_UC	6	74	0.0810811	IBD	Franzosa_2018
M00063	G48791_UC	22	74	0.297297	IBD	Franzosa_2018
M00064	G48791_UC	1	74	0.0135135	IBD	Franzosa_2018
M00082	G48791_UC	35	74	0.472973	IBD	Franzosa_2018
M00083	G48791_UC	71	74	0.959459	IBD	Franzosa_2018
M00086	G48791_UC	84	74	1.13514	IBD	Franzosa_2018
M00087	G48791_UC	0	74	0	IBD	Franzosa_2018
M00088	G48791_UC	0	74	0	IBD	Franzosa_2018
M00091	G48791_UC	7	74	0.0945946	IBD	Franzosa_2018
M00093	G48791_UC	35	74	0.472973	IBD	Franzosa_2018
M00095	G48791_UC	1	74	0.0135135	IBD	Franzosa_2018
M00096	G48791_UC	55	74	0.743243	IBD	Franzosa_2018
M00098	G48791_UC	4	74	0.0540541	IBD	Franzosa_2018
M00115	G48791_UC	52	74	0.702703	IBD	Franzosa_2018
M00116	G48791_UC	1	74	0.0135135	IBD	Franzosa_2018
M00117	G48791_UC	0	74	0	IBD	Franzosa_2018
M00118	G48791_UC	0	74	0	IBD	Franzosa_2018
M00119	G48791_UC	36	74	0.486486	IBD	Franzosa_2018
M00120	G48791_UC	66	74	0.891892	IBD	Franzosa_2018
M00121	G48791_UC	4	74	0.0540541	IBD	Franzosa_2018
M00122	G48791_UC	39	74	0.527027	IBD	Franzosa_2018
M00123	G48791_UC	19	74	0.256757	IBD	Franzosa_2018
M00124	G48791_UC	0	74	0	IBD	Franzosa_2018
M00125	G48791_UC	40	74	0.540541	IBD	Franzosa_2018
M00126	G48791_UC	40	74	0.540541	IBD	Franzosa_2018
M00127	G48791_UC	26	74	0.351351	IBD	Franzosa_2018
M00133	G48791_UC	7	74	0.0945946	IBD	Franzosa_2018
M00134	G48791_UC	1	74	0.0135135	IBD	Franzosa_2018
M00136	G48791_UC	0	74	0	IBD	Franzosa_2018
M00140	G48791_UC	76	74	1.02703	IBD	Franzosa_2018
M00142	G48791_UC	0	74	0	IBD	Franzosa_2018
M00144	G48791_UC	31	74	0.418919	IBD	Franzosa_2018
M00145	G48791_UC	0	74	0	IBD	Franzosa_2018
M00149	G48791_UC	0	74	0	IBD	Franzosa_2018
M00150	G48791_UC	0	74	0	IBD	Franzosa_2018
M00151	G48791_UC	0	74	0	IBD	Franzosa_2018
M00153	G48791_UC	0	74	0	IBD	Franzosa_2018
M00155	G48791_UC	0	74	0	IBD	Franzosa_2018
M00156	G48791_UC	0	74	0	IBD	Franzosa_2018
M00157	G48791_UC	69	74	0.932432	IBD	Franzosa_2018
M00159	G48791_UC	14	74	0.189189	IBD	Franzosa_2018
M00161	G48791_UC	0	74	0	IBD	Franzosa_2018
M00166	G48791_UC	0	74	0	IBD	Franzosa_2018
M00168	G48791_UC	8	74	0.108108	IBD	Franzosa_2018
M00169	G48791_UC	16	74	0.216216	IBD	Franzosa_2018
M00175	G48791_UC	0	74	0	IBD	Franzosa_2018
M00176	G48791_UC	0	74	0	IBD	Franzosa_2018
M00307	G48791_UC	109	74	1.47297	IBD	Franzosa_2018
M00308	G48791_UC	1	74	0.0135135	IBD	Franzosa_2018
M00338	G48791_UC	0	74	0	IBD	Franzosa_2018
M00345	G48791_UC	6	74	0.0810811	IBD	Franzosa_2018
M00356	G48791_UC	2	74	0.027027	IBD	Franzosa_2018
M00357	G48791_UC	1	74	0.0135135	IBD	Franzosa_2018
M00358	G48791_UC	2	74	0.027027	IBD	Franzosa_2018
M00363	G48791_UC	0	74	0	IBD	Franzosa_2018
M00364	G48791_UC	33	74	0.445946	IBD	Franzosa_2018
M00365	G48791_UC	18	74	0.243243	IBD	Franzosa_2018
M00417	G48791_UC	0	74	0	IBD	Franzosa_2018
M00432	G48791_UC	55	74	0.743243	IBD	Franzosa_2018
M00525	G48791_UC	1	74	0.0135135	IBD	Franzosa_2018
M00526	G48791_UC	35	74	0.472973	IBD	Franzosa_2018
M00527	G48791_UC	75	74	1.01351	IBD	Franzosa_2018
M00529	G48791_UC	0	74	0	IBD	Franzosa_2018
M00530	G48791_UC	1	74	0.0135135	IBD	Franzosa_2018
M00533	G48791_UC	0	74	0	IBD	Franzosa_2018
M00535	G48791_UC	15	74	0.202703	IBD	Franzosa_2018
M00545	G48791_UC	0	74	0	IBD	Franzosa_2018
M00546	G48791_UC	0	74	0	IBD	Franzosa_2018
M00549	G48791_UC	31	74	0.418919	IBD	Franzosa_2018
M00550	G48791_UC	0	74	0	IBD	Franzosa_2018
M00551	G48791_UC	0	74	0	IBD	Franzosa_2018
M00552	G48791_UC	0	74	0	IBD	Franzosa_2018
M00554	G48791_UC	5	74	0.0675676	IBD	Franzosa_2018
M00555	G48791_UC	0	74	0	IBD	Franzosa_2018
M00563	G48791_UC	1	74	0.0135135	IBD	Franzosa_2018
M00565	G48791_UC	0	74	0	IBD	Franzosa_2018
M00567	G48791_UC	1	74	0.0135135	IBD	Franzosa_2018
M00568	G48791_UC	0	74	0	IBD	Franzosa_2018
M00569	G48791_UC	0	74	0	IBD	Franzosa_2018
M00570	G48791_UC	46	74	0.621622	IBD	Franzosa_2018
M00572	G48791_UC	13	74	0.175676	IBD	Franzosa_2018
M00577	G48791_UC	2	74	0.027027	IBD	Franzosa_2018
M00579	G48791_UC	41	74	0.554054	IBD	Franzosa_2018
M00580	G48791_UC	6	74	0.0810811	IBD	Franzosa_2018
M00595	G48791_UC	0	74	0	IBD	Franzosa_2018
M00596	G48791_UC	1	74	0.0135135	IBD	Franzosa_2018
M00608	G48791_UC	0	74	0	IBD	Franzosa_2018
M00616	G48791_UC	0	74	0	IBD	Franzosa_2018
M00617	G48791_UC	5	74	0.0675676	IBD	Franzosa_2018
M00620	G48791_UC	1	74	0.0135135	IBD	Franzosa_2018
M00622	G48791_UC	0	74	0	IBD	Franzosa_2018
M00627	G48791_UC	43	74	0.581081	IBD	Franzosa_2018
M00631	G48791_UC	23	74	0.310811	IBD	Franzosa_2018
M00632	G48791_UC	5	74	0.0675676	IBD	Franzosa_2018
M00637	G48791_UC	0	74	0	IBD	Franzosa_2018
M00641	G48791_UC	0	74	0	IBD	Franzosa_2018
M00642	G48791_UC	0	74	0	IBD	Franzosa_2018
M00649	G48791_UC	0	74	0	IBD	Franzosa_2018
M00651	G48791_UC	23	74	0.310811	IBD	Franzosa_2018
M00652	G48791_UC	6	74	0.0810811	IBD	Franzosa_2018
M00696	G48791_UC	0	74	0	IBD	Franzosa_2018
M00697	G48791_UC	0	74	0	IBD	Franzosa_2018
M00698	G48791_UC	0	74	0	IBD	Franzosa_2018
M00700	G48791_UC	0	74	0	IBD	Franzosa_2018
M00702	G48791_UC	0	74	0	IBD	Franzosa_2018
M00705	G48791_UC	39	74	0.527027	IBD	Franzosa_2018
M00725	G48791_UC	0	74	0	IBD	Franzosa_2018
M00741	G48791_UC	25	74	0.337838	IBD	Franzosa_2018
M00745	G48791_UC	0	74	0	IBD	Franzosa_2018
M00761	G48791_UC	0	74	0	IBD	Franzosa_2018
M00793	G48791_UC	59	74	0.797297	IBD	Franzosa_2018
M00844	G48791_UC	74	74	1	IBD	Franzosa_2018
M00846	G48791_UC	15	74	0.202703	IBD	Franzosa_2018
M00847	G48791_UC	2	74	0.027027	IBD	Franzosa_2018
M00854	G48791_UC	108	74	1.45946	IBD	Franzosa_2018
M00855	G48791_UC	29	74	0.391892	IBD	Franzosa_2018
M00866	G48791_UC	0	74	0	IBD	Franzosa_2018
M00877	G48791_UC	0	74	0	IBD	Franzosa_2018
M00878	G48791_UC	0	74	0	IBD	Franzosa_2018
M00879	G48791_UC	0	74	0	IBD	Franzosa_2018
M00880	G48791_UC	3	74	0.0405405	IBD	Franzosa_2018
M00881	G48791_UC	17	74	0.22973	IBD	Franzosa_2018
M00882	G48791_UC	1	74	0.0135135	IBD	Franzosa_2018
M00883	G48791_UC	0	74	0	IBD	Franzosa_2018
M00895	G48791_UC	0	74	0	IBD	Franzosa_2018
M00896	G48791_UC	4	74	0.0540541	IBD	Franzosa_2018
M00899	G48791_UC	41	74	0.554054	IBD	Franzosa_2018
M00909	G48791_UC	27	74	0.364865	IBD	Franzosa_2018
M00914	G48791_UC	1	74	0.0135135	IBD	Franzosa_2018
M00916	G48791_UC	25	74	0.337838	IBD	Franzosa_2018
M00918	G48791_UC	0	74	0	IBD	Franzosa_2018
M00922	G48791_UC	0	74	0	IBD	Franzosa_2018
M00923	G48791_UC	0	74	0	IBD	Franzosa_2018
M00924	G48791_UC	20	74	0.27027	IBD	Franzosa_2018
M00925	G48791_UC	0	74	0	IBD	Franzosa_2018
M00926	G48791_UC	0	74	0	IBD	Franzosa_2018
M00930	G48791_UC	5	74	0.0675676	IBD	Franzosa_2018
M00931	G48791_UC	0	74	0	IBD	Franzosa_2018
M00935	G48791_UC	1	74	0.0135135	IBD	Franzosa_2018
M00001	G48794_UC	65	61	1.06557	IBD	Franzosa_2018
M00002	G48794_UC	65	61	1.06557	IBD	Franzosa_2018
M00003	G48794_UC	36	61	0.590164	IBD	Franzosa_2018
M00004	G48794_UC	12	61	0.196721	IBD	Franzosa_2018
M00005	G48794_UC	77	61	1.2623	IBD	Franzosa_2018
M00006	G48794_UC	12	61	0.196721	IBD	Franzosa_2018
M00007	G48794_UC	39	61	0.639344	IBD	Franzosa_2018
M00008	G48794_UC	0	61	0	IBD	Franzosa_2018
M00009	G48794_UC	3	61	0.0491803	IBD	Franzosa_2018
M00010	G48794_UC	3	61	0.0491803	IBD	Franzosa_2018
M00011	G48794_UC	10	61	0.163934	IBD	Franzosa_2018
M00012	G48794_UC	0	61	0	IBD	Franzosa_2018
M00015	G48794_UC	51	61	0.836066	IBD	Franzosa_2018
M00016	G48794_UC	8	61	0.131148	IBD	Franzosa_2018
M00017	G48794_UC	6	61	0.0983607	IBD	Franzosa_2018
M00018	G48794_UC	28	61	0.459016	IBD	Franzosa_2018
M00019	G48794_UC	46	61	0.754098	IBD	Franzosa_2018
M00020	G48794_UC	41	61	0.672131	IBD	Franzosa_2018
M00021	G48794_UC	70	61	1.14754	IBD	Franzosa_2018
M00022	G48794_UC	65	61	1.06557	IBD	Franzosa_2018
M00023	G48794_UC	33	61	0.540984	IBD	Franzosa_2018
M00024	G48794_UC	0	61	0	IBD	Franzosa_2018
M00025	G48794_UC	0	61	0	IBD	Franzosa_2018
M00026	G48794_UC	33	61	0.540984	IBD	Franzosa_2018
M00027	G48794_UC	1	61	0.0163934	IBD	Franzosa_2018
M00028	G48794_UC	51	61	0.836066	IBD	Franzosa_2018
M00034	G48794_UC	0	61	0	IBD	Franzosa_2018
M00035	G48794_UC	2	61	0.0327869	IBD	Franzosa_2018
M00036	G48794_UC	0	61	0	IBD	Franzosa_2018
M00040	G48794_UC	0	61	0	IBD	Franzosa_2018
[truncated: 71,033 more rows]

## Sheet: e) Palleja et al PPCN data
module	sample	subject	timepoint (days)	stepwise copy number	number of populations	PPCN
M00001	ERAS10_Day0	ERAS10	0	35	30	1.16667
M00002	ERAS10_Day0	ERAS10	0	35	30	1.16667
M00003	ERAS10_Day0	ERAS10	0	30	30	1
M00004	ERAS10_Day0	ERAS10	0	9	30	0.3
M00005	ERAS10_Day0	ERAS10	0	42	30	1.4
M00006	ERAS10_Day0	ERAS10	0	9	30	0.3
M00007	ERAS10_Day0	ERAS10	0	17	30	0.566667
M00008	ERAS10_Day0	ERAS10	0	0	30	0
M00009	ERAS10_Day0	ERAS10	0	0	30	0
M00010	ERAS10_Day0	ERAS10	0	0	30	0
M00011	ERAS10_Day0	ERAS10	0	2	30	0.0666667
M00012	ERAS10_Day0	ERAS10	0	0	30	0
M00015	ERAS10_Day0	ERAS10	0	33	30	1.1
M00016	ERAS10_Day0	ERAS10	0	2	30	0.0666667
M00017	ERAS10_Day0	ERAS10	0	4	30	0.133333
M00018	ERAS10_Day0	ERAS10	0	17	30	0.566667
M00019	ERAS10_Day0	ERAS10	0	25	30	0.833333
M00020	ERAS10_Day0	ERAS10	0	23	30	0.766667
M00021	ERAS10_Day0	ERAS10	0	34	30	1.13333
M00022	ERAS10_Day0	ERAS10	0	25	30	0.833333
M00023	ERAS10_Day0	ERAS10	0	18	30	0.6
M00024	ERAS10_Day0	ERAS10	0	0	30	0
M00025	ERAS10_Day0	ERAS10	0	0	30	0
M00026	ERAS10_Day0	ERAS10	0	20	30	0.666667
M00027	ERAS10_Day0	ERAS10	0	0	30	0
M00028	ERAS10_Day0	ERAS10	0	25	30	0.833333
M00034	ERAS10_Day0	ERAS10	0	0	30	0
M00035	ERAS10_Day0	ERAS10	0	0	30	0
M00040	ERAS10_Day0	ERAS10	0	0	30	0
M00045	ERAS10_Day0	ERAS10	0	10	30	0.333333
M00046	ERAS10_Day0	ERAS10	0	1	30	0.0333333
M00048	ERAS10_Day0	ERAS10	0	29	30	0.966667
M00049	ERAS10_Day0	ERAS10	0	37	30	1.23333
M00050	ERAS10_Day0	ERAS10	0	36	30	1.2
M00051	ERAS10_Day0	ERAS10	0	33	30	1.1
M00052	ERAS10_Day0	ERAS10	0	9	30	0.3
M00053	ERAS10_Day0	ERAS10	0	2	30	0.0666667
M00060	ERAS10_Day0	ERAS10	0	0	30	0
M00061	ERAS10_Day0	ERAS10	0	2	30	0.0666667
M00063	ERAS10_Day0	ERAS10	0	16	30	0.533333
M00064	ERAS10_Day0	ERAS10	0	3	30	0.1
M00082	ERAS10_Day0	ERAS10	0	13	30	0.433333
M00083	ERAS10_Day0	ERAS10	0	36	30	1.2
M00086	ERAS10_Day0	ERAS10	0	45	30	1.5
M00087	ERAS10_Day0	ERAS10	0	0	30	0
M00088	ERAS10_Day0	ERAS10	0	0	30	0
M00091	ERAS10_Day0	ERAS10	0	7	30	0.233333
M00093	ERAS10_Day0	ERAS10	0	20	30	0.666667
M00096	ERAS10_Day0	ERAS10	0	23	30	0.766667
M00098	ERAS10_Day0	ERAS10	0	12	30	0.4
M00115	ERAS10_Day0	ERAS10	0	21	30	0.7
M00116	ERAS10_Day0	ERAS10	0	0	30	0
M00117	ERAS10_Day0	ERAS10	0	0	30	0
M00118	ERAS10_Day0	ERAS10	0	0	30	0
M00119	ERAS10_Day0	ERAS10	0	14	30	0.466667
M00120	ERAS10_Day0	ERAS10	0	24	30	0.8
M00121	ERAS10_Day0	ERAS10	0	1	30	0.0333333
M00122	ERAS10_Day0	ERAS10	0	22	30	0.733333
M00123	ERAS10_Day0	ERAS10	0	10	30	0.333333
M00124	ERAS10_Day0	ERAS10	0	0	30	0
M00125	ERAS10_Day0	ERAS10	0	21	30	0.7
M00126	ERAS10_Day0	ERAS10	0	22	30	0.733333
M00127	ERAS10_Day0	ERAS10	0	13	30	0.433333
M00133	ERAS10_Day0	ERAS10	0	1	30	0.0333333
M00134	ERAS10_Day0	ERAS10	0	0	30	0
M00136	ERAS10_Day0	ERAS10	0	0	30	0
M00140	ERAS10_Day0	ERAS10	0	36	30	1.2
M00142	ERAS10_Day0	ERAS10	0	0	30	0
M00144	ERAS10_Day0	ERAS10	0	16	30	0.533333
M00145	ERAS10_Day0	ERAS10	0	0	30	0
M00149	ERAS10_Day0	ERAS10	0	0	30	0
M00150	ERAS10_Day0	ERAS10	0	0	30	0
M00151	ERAS10_Day0	ERAS10	0	0	30	0
M00153	ERAS10_Day0	ERAS10	0	0	30	0
M00157	ERAS10_Day0	ERAS10	0	38	30	1.26667
M00159	ERAS10_Day0	ERAS10	0	6	30	0.2
M00161	ERAS10_Day0	ERAS10	0	0	30	0
M00166	ERAS10_Day0	ERAS10	0	0	30	0
M00168	ERAS10_Day0	ERAS10	0	1	30	0.0333333
M00169	ERAS10_Day0	ERAS10	0	15	30	0.5
M00175	ERAS10_Day0	ERAS10	0	0	30	0
M00176	ERAS10_Day0	ERAS10	0	0	30	0
M00307	ERAS10_Day0	ERAS10	0	47	30	1.56667
M00308	ERAS10_Day0	ERAS10	0	0	30	0
M00338	ERAS10_Day0	ERAS10	0	0	30	0
M00345	ERAS10_Day0	ERAS10	0	0	30	0
M00356	ERAS10_Day0	ERAS10	0	0	30	0
M00357	ERAS10_Day0	ERAS10	0	0	30	0
M00358	ERAS10_Day0	ERAS10	0	0	30	0
M00364	ERAS10_Day0	ERAS10	0	13	30	0.433333
M00365	ERAS10_Day0	ERAS10	0	10	30	0.333333
M00417	ERAS10_Day0	ERAS10	0	0	30	0
M00432	ERAS10_Day0	ERAS10	0	25	30	0.833333
M00525	ERAS10_Day0	ERAS10	0	0	30	0
M00526	ERAS10_Day0	ERAS10	0	16	30	0.533333
M00527	ERAS10_Day0	ERAS10	0	34	30	1.13333
M00530	ERAS10_Day0	ERAS10	0	1	30	0.0333333
M00533	ERAS10_Day0	ERAS10	0	0	30	0
M00535	ERAS10_Day0	ERAS10	0	11	30	0.366667
M00545	ERAS10_Day0	ERAS10	0	0	30	0
M00549	ERAS10_Day0	ERAS10	0	6	30	0.2
M00550	ERAS10_Day0	ERAS10	0	0	30	0
M00551	ERAS10_Day0	ERAS10	0	0	30	0
M00552	ERAS10_Day0	ERAS10	0	0	30	0
M00554	ERAS10_Day0	ERAS10	0	0	30	0
M00555	ERAS10_Day0	ERAS10	0	0	30	0
M00565	ERAS10_Day0	ERAS10	0	0	30	0
M00567	ERAS10_Day0	ERAS10	0	0	30	0
M00568	ERAS10_Day0	ERAS10	0	0	30	0
M00570	ERAS10_Day0	ERAS10	0	24	30	0.8
M00572	ERAS10_Day0	ERAS10	0	9	30	0.3
M00577	ERAS10_Day0	ERAS10	0	1	30	0.0333333
M00579	ERAS10_Day0	ERAS10	0	10	30	0.333333
M00580	ERAS10_Day0	ERAS10	0	0	30	0
M00596	ERAS10_Day0	ERAS10	0	0	30	0
M00616	ERAS10_Day0	ERAS10	0	0	30	0
M00617	ERAS10_Day0	ERAS10	0	0	30	0
M00627	ERAS10_Day0	ERAS10	0	21	30	0.7
M00631	ERAS10_Day0	ERAS10	0	15	30	0.5
M00632	ERAS10_Day0	ERAS10	0	0	30	0
M00649	ERAS10_Day0	ERAS10	0	0	30	0
M00651	ERAS10_Day0	ERAS10	0	10	30	0.333333
M00652	ERAS10_Day0	ERAS10	0	2	30	0.0666667
M00696	ERAS10_Day0	ERAS10	0	0	30	0
M00697	ERAS10_Day0	ERAS10	0	0	30	0
M00698	ERAS10_Day0	ERAS10	0	0	30	0
M00700	ERAS10_Day0	ERAS10	0	0	30	0
M00702	ERAS10_Day0	ERAS10	0	0	30	0
M00705	ERAS10_Day0	ERAS10	0	12	30	0.4
M00741	ERAS10_Day0	ERAS10	0	11	30	0.366667
M00745	ERAS10_Day0	ERAS10	0	0	30	0
M00761	ERAS10_Day0	ERAS10	0	0	30	0
M00793	ERAS10_Day0	ERAS10	0	29	30	0.966667
M00844	ERAS10_Day0	ERAS10	0	32	30	1.06667
M00846	ERAS10_Day0	ERAS10	0	5	30	0.166667
M00847	ERAS10_Day0	ERAS10	0	0	30	0
M00854	ERAS10_Day0	ERAS10	0	43	30	1.43333
M00855	ERAS10_Day0	ERAS10	0	21	30	0.7
M00866	ERAS10_Day0	ERAS10	0	0	30	0
M00868	ERAS10_Day0	ERAS10	0	0	30	0
M00878	ERAS10_Day0	ERAS10	0	0	30	0
M00879	ERAS10_Day0	ERAS10	0	0	30	0
M00880	ERAS10_Day0	ERAS10	0	2	30	0.0666667
M00881	ERAS10_Day0	ERAS10	0	8	30	0.266667
M00882	ERAS10_Day0	ERAS10	0	0	30	0
M00883	ERAS10_Day0	ERAS10	0	0	30	0
M00896	ERAS10_Day0	ERAS10	0	3	30	0.1
M00899	ERAS10_Day0	ERAS10	0	16	30	0.533333
M00909	ERAS10_Day0	ERAS10	0	12	30	0.4
M00916	ERAS10_Day0	ERAS10	0	7	30	0.233333
M00918	ERAS10_Day0	ERAS10	0	0	30	0
M00924	ERAS10_Day0	ERAS10	0	6	30	0.2
M00926	ERAS10_Day0	ERAS10	0	0	30	0
M00930	ERAS10_Day0	ERAS10	0	1	30	0.0333333
M00931	ERAS10_Day0	ERAS10	0	0	30	0
M00935	ERAS10_Day0	ERAS10	0	0	30	0
M00001	ERAS10_Day180	ERAS10	180	36	37	0.972973
M00002	ERAS10_Day180	ERAS10	180	36	37	0.972973
M00003	ERAS10_Day180	ERAS10	180	34	37	0.918919
M00004	ERAS10_Day180	ERAS10	180	3	37	0.0810811
M00005	ERAS10_Day180	ERAS10	180	47	37	1.27027
M00006	ERAS10_Day180	ERAS10	180	3	37	0.0810811
M00007	ERAS10_Day180	ERAS10	180	23	37	0.621622
M00008	ERAS10_Day180	ERAS10	180	0	37	0
M00009	ERAS10_Day180	ERAS10	180	2	37	0.0540541
M00010	ERAS10_Day180	ERAS10	180	2	37	0.0540541
M00011	ERAS10_Day180	ERAS10	180	5	37	0.135135
M00012	ERAS10_Day180	ERAS10	180	0	37	0
M00015	ERAS10_Day180	ERAS10	180	31	37	0.837838
M00016	ERAS10_Day180	ERAS10	180	3	37	0.0810811
M00017	ERAS10_Day180	ERAS10	180	3	37	0.0810811
M00018	ERAS10_Day180	ERAS10	180	23	37	0.621622
M00019	ERAS10_Day180	ERAS10	180	31	37	0.837838
M00020	ERAS10_Day180	ERAS10	180	24	37	0.648649
M00021	ERAS10_Day180	ERAS10	180	34	37	0.918919
M00022	ERAS10_Day180	ERAS10	180	29	37	0.783784
M00023	ERAS10_Day180	ERAS10	180	21	37	0.567568
M00024	ERAS10_Day180	ERAS10	180	0	37	0
M00025	ERAS10_Day180	ERAS10	180	0	37	0
M00026	ERAS10_Day180	ERAS10	180	25	37	0.675676
M00027	ERAS10_Day180	ERAS10	180	0	37	0
M00028	ERAS10_Day180	ERAS10	180	29	37	0.783784
M00034	ERAS10_Day180	ERAS10	180	0	37	0
M00035	ERAS10_Day180	ERAS10	180	0	37	0
M00040	ERAS10_Day180	ERAS10	180	0	37	0
M00045	ERAS10_Day180	ERAS10	180	4	37	0.108108
M00046	ERAS10_Day180	ERAS10	180	2	37	0.0540541
M00048	ERAS10_Day180	ERAS10	180	31	37	0.837838
M00049	ERAS10_Day180	ERAS10	180	34	37	0.918919
M00050	ERAS10_Day180	ERAS10	180	34	37	0.918919
M00051	ERAS10_Day180	ERAS10	180	34	37	0.918919
M00052	ERAS10_Day180	ERAS10	180	4	37	0.108108
M00053	ERAS10_Day180	ERAS10	180	4	37	0.108108
M00060	ERAS10_Day180	ERAS10	180	0	37	0
M00061	ERAS10_Day180	ERAS10	180	8	37	0.216216
M00063	ERAS10_Day180	ERAS10	180	11	37	0.297297
M00064	ERAS10_Day180	ERAS10	180	3	37	0.0810811
M00082	ERAS10_Day180	ERAS10	180	20	37	0.540541
M00083	ERAS10_Day180	ERAS10	180	41	37	1.10811
M00086	ERAS10_Day180	ERAS10	180	30	37	0.810811
M00087	ERAS10_Day180	ERAS10	180	2	37	0.0540541
M00088	ERAS10_Day180	ERAS10	180	0	37	0
M00091	ERAS10_Day180	ERAS10	180	2	37	0.0540541
M00093	ERAS10_Day180	ERAS10	180	16	37	0.432432
M00096	ERAS10_Day180	ERAS10	180	20	37	0.540541
M00098	ERAS10_Day180	ERAS10	180	2	37	0.0540541
M00115	ERAS10_Day180	ERAS10	180	21	37	0.567568
M00116	ERAS10_Day180	ERAS10	180	0	37	0
M00117	ERAS10_Day180	ERAS10	180	0	37	0
M00118	ERAS10_Day180	ERAS10	180	0	37	0
M00119	ERAS10_Day180	ERAS10	180	15	37	0.405405
M00120	ERAS10_Day180	ERAS10	180	29	37	0.783784
M00121	ERAS10_Day180	ERAS10	180	2	37	0.0540541
M00122	ERAS10_Day180	ERAS10	180	23	37	0.621622
M00123	ERAS10_Day180	ERAS10	180	7	37	0.189189
M00124	ERAS10_Day180	ERAS10	180	0	37	0
M00125	ERAS10_Day180	ERAS10	180	20	37	0.540541
M00126	ERAS10_Day180	ERAS10	180	19	37	0.513514
M00127	ERAS10_Day180	ERAS10	180	11	37	0.297297
M00133	ERAS10_Day180	ERAS10	180	2	37	0.0540541
M00134	ERAS10_Day180	ERAS10	180	0	37	0
M00136	ERAS10_Day180	ERAS10	180	0	37	0
M00140	ERAS10_Day180	ERAS10	180	35	37	0.945946
M00142	ERAS10_Day180	ERAS10	180	0	37	0
M00144	ERAS10_Day180	ERAS10	180	6	37	0.162162
M00145	ERAS10_Day180	ERAS10	180	0	37	0
M00149	ERAS10_Day180	ERAS10	180	0	37	0
M00150	ERAS10_Day180	ERAS10	180	0	37	0
M00151	ERAS10_Day180	ERAS10	180	0	37	0
M00153	ERAS10_Day180	ERAS10	180	0	37	0
M00157	ERAS10_Day180	ERAS10	180	40	37	1.08108
M00159	ERAS10_Day180	ERAS10	180	11	37	0.297297
M00161	ERAS10_Day180	ERAS10	180	0	37	0
M00166	ERAS10_Day180	ERAS10	180	0	37	0
M00168	ERAS10_Day180	ERAS10	180	2	37	0.0540541
M00169	ERAS10_Day180	ERAS10	180	7	37	0.189189
M00175	ERAS10_Day180	ERAS10	180	0	37	0
M00176	ERAS10_Day180	ERAS10	180	0	37	0
M00307	ERAS10_Day180	ERAS10	180	58	37	1.56757
M00308	ERAS10_Day180	ERAS10	180	0	37	0
M00338	ERAS10_Day180	ERAS10	180	0	37	0
M00345	ERAS10_Day180	ERAS10	180	2	37	0.0540541
M00356	ERAS10_Day180	ERAS10	180	0	37	0
M00357	ERAS10_Day180	ERAS10	180	0	37	0
M00358	ERAS10_Day180	ERAS10	180	0	37	0
M00364	ERAS10_Day180	ERAS10	180	11	37	0.297297
M00365	ERAS10_Day180	ERAS10	180	4	37	0.108108
M00417	ERAS10_Day180	ERAS10	180	1	37	0.027027
M00432	ERAS10_Day180	ERAS10	180	34	37	0.918919
M00525	ERAS10_Day180	ERAS10	180	0	37	0
M00526	ERAS10_Day180	ERAS10	180	16	37	0.432432
M00527	ERAS10_Day180	ERAS10	180	33	37	0.891892
M00530	ERAS10_Day180	ERAS10	180	2	37	0.0540541
M00533	ERAS10_Day180	ERAS10	180	0	37	0
M00535	ERAS10_Day180	ERAS10	180	3	37	0.0810811
M00545	ERAS10_Day180	ERAS10	180	0	37	0
M00549	ERAS10_Day180	ERAS10	180	11	37	0.297297
M00550	ERAS10_Day180	ERAS10	180	0	37	0
M00551	ERAS10_Day180	ERAS10	180	0	37	0
M00552	ERAS10_Day180	ERAS10	180	1	37	0.027027
M00554	ERAS10_Day180	ERAS10	180	0	37	0
M00555	ERAS10_Day180	ERAS10	180	0	37	0
M00565	ERAS10_Day180	ERAS10	180	0	37	0
M00567	ERAS10_Day180	ERAS10	180	0	37	0
M00568	ERAS10_Day180	ERAS10	180	0	37	0
M00570	ERAS10_Day180	ERAS10	180	28	37	0.756757
M00572	ERAS10_Day180	ERAS10	180	3	37	0.0810811
M00577	ERAS10_Day180	ERAS10	180	1	37	0.027027
M00579	ERAS10_Day180	ERAS10	180	18	37	0.486486
M00580	ERAS10_Day180	ERAS10	180	2	37	0.0540541
M00596	ERAS10_Day180	ERAS10	180	0	37	0
M00616	ERAS10_Day180	ERAS10	180	0	37	0
M00617	ERAS10_Day180	ERAS10	180	0	37	0
M00627	ERAS10_Day180	ERAS10	180	16	37	0.432432
M00631	ERAS10_Day180	ERAS10	180	15	37	0.405405
M00632	ERAS10_Day180	ERAS10	180	0	37	0
M00649	ERAS10_Day180	ERAS10	180	0	37	0
M00651	ERAS10_Day180	ERAS10	180	7	37	0.189189
M00652	ERAS10_Day180	ERAS10	180	3	37	0.0810811
M00696	ERAS10_Day180	ERAS10	180	0	37	0
M00697	ERAS10_Day180	ERAS10	180	0	37	0
M00698	ERAS10_Day180	ERAS10	180	0	37	0
M00700	ERAS10_Day180	ERAS10	180	0	37	0
M00702	ERAS10_Day180	ERAS10	180	0	37	0
M00705	ERAS10_Day180	ERAS10	180	24	37	0.648649
M00741	ERAS10_Day180	ERAS10	180	7	37	0.189189
M00745	ERAS10_Day180	ERAS10	180	0	37	0
M00761	ERAS10_Day180	ERAS10	180	0	37	0
M00793	ERAS10_Day180	ERAS10	180	31	37	0.837838
M00844	ERAS10_Day180	ERAS10	180	37	37	1
M00846	ERAS10_Day180	ERAS10	180	15	37	0.405405
M00847	ERAS10_Day180	ERAS10	180	1	37	0.027027
M00854	ERAS10_Day180	ERAS10	180	49	37	1.32432
M00855	ERAS10_Day180	ERAS10	180	14	37	0.378378
M00866	ERAS10_Day180	ERAS10	180	1	37	0.027027
M00868	ERAS10_Day180	ERAS10	180	0	37	0
M00878	ERAS10_Day180	ERAS10	180	0	37	0
M00879	ERAS10_Day180	ERAS10	180	0	37	0
M00880	ERAS10_Day180	ERAS10	180	3	37	0.0810811
M00881	ERAS10_Day180	ERAS10	180	6	37	0.162162
M00882	ERAS10_Day180	ERAS10	180	0	37	0
M00883	ERAS10_Day180	ERAS10	180	0	37	0
M00896	ERAS10_Day180	ERAS10	180	2	37	0.0540541
M00899	ERAS10_Day180	ERAS10	180	23	37	0.621622
M00909	ERAS10_Day180	ERAS10	180	17	37	0.459459
M00916	ERAS10_Day180	ERAS10	180	10	37	0.27027
M00918	ERAS10_Day180	ERAS10	180	0	37	0
M00924	ERAS10_Day180	ERAS10	180	15	37	0.405405
M00926	ERAS10_Day180	ERAS10	180	0	37	0
M00930	ERAS10_Day180	ERAS10	180	1	37	0.027027
M00931	ERAS10_Day180	ERAS10	180	0	37	0
M00935	ERAS10_Day180	ERAS10	180	0	37	0
M00001	ERAS10_Day42	ERAS10	42	25	23	1.08696
M00002	ERAS10_Day42	ERAS10	42	25	23	1.08696
M00003	ERAS10_Day42	ERAS10	42	19	23	0.826087
M00004	ERAS10_Day42	ERAS10	42	4	23	0.173913
M00005	ERAS10_Day42	ERAS10	42	32	23	1.3913
M00006	ERAS10_Day42	ERAS10	42	4	23	0.173913
M00007	ERAS10_Day42	ERAS10	42	10	23	0.434783
M00008	ERAS10_Day42	ERAS10	42	0	23	0
M00009	ERAS10_Day42	ERAS10	42	0	23	0
M00010	ERAS10_Day42	ERAS10	42	0	23	0
M00011	ERAS10_Day42	ERAS10	42	3	23	0.130435
M00012	ERAS10_Day42	ERAS10	42	0	23	0
M00015	ERAS10_Day42	ERAS10	42	21	23	0.913043
M00016	ERAS10_Day42	ERAS10	42	2	23	0.0869565
M00017	ERAS10_Day42	ERAS10	42	0	23	0
M00018	ERAS10_Day42	ERAS10	42	17	23	0.73913
M00019	ERAS10_Day42	ERAS10	42	18	23	0.782609
M00020	ERAS10_Day42	ERAS10	42	17	23	0.73913
M00021	ERAS10_Day42	ERAS10	42	19	23	0.826087
M00022	ERAS10_Day42	ERAS10	42	21	23	0.913043
M00023	ERAS10_Day42	ERAS10	42	11	23	0.478261
M00024	ERAS10_Day42	ERAS10	42	0	23	0
M00025	ERAS10_Day42	ERAS10	42	0	23	0
M00026	ERAS10_Day42	ERAS10	42	14	23	0.608696
M00027	ERAS10_Day42	ERAS10	42	0	23	0
M00028	ERAS10_Day42	ERAS10	42	18	23	0.782609
M00034	ERAS10_Day42	ERAS10	42	0	23	0
M00035	ERAS10_Day42	ERAS10	42	0	23	0
M00040	ERAS10_Day42	ERAS10	42	0	23	0
M00045	ERAS10_Day42	ERAS10	42	5	23	0.217391
M00046	ERAS10_Day42	ERAS10	42	1	23	0.0434783
M00048	ERAS10_Day42	ERAS10	42	23	23	1
M00049	ERAS10_Day42	ERAS10	42	24	23	1.04348
M00050	ERAS10_Day42	ERAS10	42	23	23	1
M00051	ERAS10_Day42	ERAS10	42	23	23	1
M00052	ERAS10_Day42	ERAS10	42	4	23	0.173913
M00053	ERAS10_Day42	ERAS10	42	3	23	0.130435
M00060	ERAS10_Day42	ERAS10	42	0	23	0
M00061	ERAS10_Day42	ERAS10	42	3	23	0.130435
M00063	ERAS10_Day42	ERAS10	42	6	23	0.26087
M00064	ERAS10_Day42	ERAS10	42	2	23	0.0869565
M00082	ERAS10_Day42	ERAS10	42	17	23	0.73913
M00083	ERAS10_Day42	ERAS10	42	26	23	1.13043
M00086	ERAS10_Day42	ERAS10	42	24	23	1.04348
M00087	ERAS10_Day42	ERAS10	42	2	23	0.0869565
M00088	ERAS10_Day42	ERAS10	42	0	23	0
M00091	ERAS10_Day42	ERAS10	42	1	23	0.0434783
M00093	ERAS10_Day42	ERAS10	42	10	23	0.434783
M00096	ERAS10_Day42	ERAS10	42	10	23	0.434783
M00098	ERAS10_Day42	ERAS10	42	4	23	0.173913
M00115	ERAS10_Day42	ERAS10	42	13	23	0.565217
M00116	ERAS10_Day42	ERAS10	42	0	23	0
M00117	ERAS10_Day42	ERAS10	42	0	23	0
M00118	ERAS10_Day42	ERAS10	42	0	23	0
M00119	ERAS10_Day42	ERAS10	42	8	23	0.347826
M00120	ERAS10_Day42	ERAS10	42	15	23	0.652174
M00121	ERAS10_Day42	ERAS10	42	2	23	0.0869565
M00122	ERAS10_Day42	ERAS10	42	13	23	0.565217
M00123	ERAS10_Day42	ERAS10	42	5	23	0.217391
M00124	ERAS10_Day42	ERAS10	42	0	23	0
M00125	ERAS10_Day42	ERAS10	42	14	23	0.608696
M00126	ERAS10_Day42	ERAS10	42	9	23	0.391304
M00127	ERAS10_Day42	ERAS10	42	9	23	0.391304
M00133	ERAS10_Day42	ERAS10	42	2	23	0.0869565
M00134	ERAS10_Day42	ERAS10	42	0	23	0
M00136	ERAS10_Day42	ERAS10	42	0	23	0
M00140	ERAS10_Day42	ERAS10	42	23	23	1
M00142	ERAS10_Day42	ERAS10	42	0	23	0
M00144	ERAS10_Day42	ERAS10	42	4	23	0.173913
M00145	ERAS10_Day42	ERAS10	42	0	23	0
M00149	ERAS10_Day42	ERAS10	42	0	23	0
M00150	ERAS10_Day42	ERAS10	42	0	23	0
M00151	ERAS10_Day42	ERAS10	42	0	23	0
M00153	ERAS10_Day42	ERAS10	42	0	23	0
M00157	ERAS10_Day42	ERAS10	42	20	23	0.869565
M00159	ERAS10_Day42	ERAS10	42	8	23	0.347826
M00161	ERAS10_Day42	ERAS10	42	0	23	0
M00166	ERAS10_Day42	ERAS10	42	0	23	0
M00168	ERAS10_Day42	ERAS10	42	0	23	0
M00169	ERAS10_Day42	ERAS10	42	5	23	0.217391
M00175	ERAS10_Day42	ERAS10	42	0	23	0
M00176	ERAS10_Day42	ERAS10	42	0	23	0
M00307	ERAS10_Day42	ERAS10	42	40	23	1.73913
M00308	ERAS10_Day42	ERAS10	42	0	23	0
M00338	ERAS10_Day42	ERAS10	42	0	23	0
M00345	ERAS10_Day42	ERAS10	42	2	23	0.0869565
M00356	ERAS10_Day42	ERAS10	42	0	23	0
M00357	ERAS10_Day42	ERAS10	42	0	23	0
M00358	ERAS10_Day42	ERAS10	42	0	23	0
M00364	ERAS10_Day42	ERAS10	42	10	23	0.434783
M00365	ERAS10_Day42	ERAS10	42	3	23	0.130435
M00417	ERAS10_Day42	ERAS10	42	0	23	0
M00432	ERAS10_Day42	ERAS10	42	19	23	0.826087
M00525	ERAS10_Day42	ERAS10	42	0	23	0
M00526	ERAS10_Day42	ERAS10	42	10	23	0.434783
M00527	ERAS10_Day42	ERAS10	42	21	23	0.913043
M00530	ERAS10_Day42	ERAS10	42	2	23	0.0869565
M00533	ERAS10_Day42	ERAS10	42	0	23	0
M00535	ERAS10_Day42	ERAS10	42	3	23	0.130435
M00545	ERAS10_Day42	ERAS10	42	0	23	0
M00549	ERAS10_Day42	ERAS10	42	11	23	0.478261
M00550	ERAS10_Day42	ERAS10	42	0	23	0
M00551	ERAS10_Day42	ERAS10	42	0	23	0
M00552	ERAS10_Day42	ERAS10	42	0	23	0
M00554	ERAS10_Day42	ERAS10	42	0	23	0
M00555	ERAS10_Day42	ERAS10	42	0	23	0
M00565	ERAS10_Day42	ERAS10	42	0	23	0
M00567	ERAS10_Day42	ERAS10	42	0	23	0
M00568	ERAS10_Day42	ERAS10	42	0	23	0
M00570	ERAS10_Day42	ERAS10	42	15	23	0.652174
M00572	ERAS10_Day42	ERAS10	42	3	23	0.130435
M00577	ERAS10_Day42	ERAS10	42	1	23	0.0434783
M00579	ERAS10_Day42	ERAS10	42	10	23	0.434783
M00580	ERAS10_Day42	ERAS10	42	2	23	0.0869565
M00596	ERAS10_Day42	ERAS10	42	0	23	0
M00616	ERAS10_Day42	ERAS10	42	0	23	0
M00617	ERAS10_Day42	ERAS10	42	0	23	0
M00627	ERAS10_Day42	ERAS10	42	9	23	0.391304
M00631	ERAS10_Day42	ERAS10	42	7	23	0.304348
M00632	ERAS10_Day42	ERAS10	42	0	23	0
M00649	ERAS10_Day42	ERAS10	42	0	23	0
M00651	ERAS10_Day42	ERAS10	42	7	23	0.304348
M00652	ERAS10_Day42	ERAS10	42	5	23	0.217391
M00696	ERAS10_Day42	ERAS10	42	0	23	0
M00697	ERAS10_Day42	ERAS10	42	0	23	0
M00698	ERAS10_Day42	ERAS10	42	0	23	0
M00700	ERAS10_Day42	ERAS10	42	0	23	0
M00702	ERAS10_Day42	ERAS10	42	0	23	0
M00705	ERAS10_Day42	ERAS10	42	11	23	0.478261
M00741	ERAS10_Day42	ERAS10	42	8	23	0.347826
M00745	ERAS10_Day42	ERAS10	42	0	23	0
M00761	ERAS10_Day42	ERAS10	42	0	23	0
M00793	ERAS10_Day42	ERAS10	42	20	23	0.869565
M00844	ERAS10_Day42	ERAS10	42	24	23	1.04348
M00846	ERAS10_Day42	ERAS10	42	9	23	0.391304
M00847	ERAS10_Day42	ERAS10	42	0	23	0
M00854	ERAS10_Day42	ERAS10	42	29	23	1.26087
M00855	ERAS10_Day42	ERAS10	42	8	23	0.347826
M00866	ERAS10_Day42	ERAS10	42	0	23	0
M00868	ERAS10_Day42	ERAS10	42	0	23	0
M00878	ERAS10_Day42	ERAS10	42	0	23	0
M00879	ERAS10_Day42	ERAS10	42	0	23	0
M00880	ERAS10_Day42	ERAS10	42	3	23	0.130435
M00881	ERAS10_Day42	ERAS10	42	4	23	0.173913
M00882	ERAS10_Day42	ERAS10	42	0	23	0
M00883	ERAS10_Day42	ERAS10	42	0	23	0
M00896	ERAS10_Day42	ERAS10	42	1	23	0.0434783
M00899	ERAS10_Day42	ERAS10	42	15	23	0.652174
M00909	ERAS10_Day42	ERAS10	42	15	23	0.652174
M00916	ERAS10_Day42	ERAS10	42	5	23	0.217391
M00918	ERAS10_Day42	ERAS10	42	0	23	0
M00924	ERAS10_Day42	ERAS10	42	10	23	0.434783
M00926	ERAS10_Day42	ERAS10	42	0	23	0
M00930	ERAS10_Day42	ERAS10	42	1	23	0.0434783
M00931	ERAS10_Day42	ERAS10	42	0	23	0
M00935	ERAS10_Day42	ERAS10	42	0	23	0
M00001	ERAS10_Day8	ERAS10	8	12	10	1.2
M00002	ERAS10_Day8	ERAS10	8	12	10	1.2
M00003	ERAS10_Day8	ERAS10	8	12	10	1.2
M00004	ERAS10_Day8	ERAS10	8	5	10	0.5
M00005	ERAS10_Day8	ERAS10	8	15	10	1.5
M00006	ERAS10_Day8	ERAS10	8	5	10	0.5
M00007	ERAS10_Day8	ERAS10	8	8	10	0.8
M00008	ERAS10_Day8	ERAS10	8	5	10	0.5
M00009	ERAS10_Day8	ERAS10	8	6	10	0.6
M00010	ERAS10_Day8	ERAS10	8	6	10	0.6
M00011	ERAS10_Day8	ERAS10	8	6	10	0.6
M00012	ERAS10_Day8	ERAS10	8	3	10	0.3
M00015	ERAS10_Day8	ERAS10	8	10	10	1
M00016	ERAS10_Day8	ERAS10	8	3	10	0.3
M00017	ERAS10_Day8	ERAS10	8	11	10	1.1
M00018	ERAS10_Day8	ERAS10	8	11	10	1.1
M00019	ERAS10_Day8	ERAS10	8	11	10	1.1
M00020	ERAS10_Day8	ERAS10	8	7	10	0.7
M00021	ERAS10_Day8	ERAS10	8	11	10	1.1
M00022	ERAS10_Day8	ERAS10	8	10	10	1
M00023	ERAS10_Day8	ERAS10	8	11	10	1.1
M00024	ERAS10_Day8	ERAS10	8	6	10	0.6
M00025	ERAS10_Day8	ERAS10	8	6	10	0.6
M00026	ERAS10_Day8	ERAS10	8	9	10	0.9
M00027	ERAS10_Day8	ERAS10	8	4	10	0.4
M00028	ERAS10_Day8	ERAS10	8	9	10	0.9
M00034	ERAS10_Day8	ERAS10	8	3	10	0.3
M00035	ERAS10_Day8	ERAS10	8	4	10	0.4
M00040	ERAS10_Day8	ERAS10	8	0	10	0
M00045	ERAS10_Day8	ERAS10	8	6	10	0.6
M00046	ERAS10_Day8	ERAS10	8	1	10	0.1
M00048	ERAS10_Day8	ERAS10	8	14	10	1.4
M00049	ERAS10_Day8	ERAS10	8	11	10	1.1
M00050	ERAS10_Day8	ERAS10	8	9	10	0.9
M00051	ERAS10_Day8	ERAS10	8	13	10	1.3
M00052	ERAS10_Day8	ERAS10	8	7	10	0.7
M00053	ERAS10_Day8	ERAS10	8	4	10	0.4
M00060	ERAS10_Day8	ERAS10	8	7	10	0.7
M00061	ERAS10_Day8	ERAS10	8	8	10	0.8
M00063	ERAS10_Day8	ERAS10	8	9	10	0.9
M00064	ERAS10_Day8	ERAS10	8	6	10	0.6
M00082	ERAS10_Day8	ERAS10	8	4	10	0.4
M00083	ERAS10_Day8	ERAS10	8	22	10	2.2
M00086	ERAS10_Day8	ERAS10	8	9	10	0.9
M00087	ERAS10_Day8	ERAS10	8	8	10	0.8
M00088	ERAS10_Day8	ERAS10	8	0	10	0
M00091	ERAS10_Day8	ERAS10	8	1	10	0.1
M00093	ERAS10_Day8	ERAS10	8	9	10	0.9
M00096	ERAS10_Day8	ERAS10	8	9	10	0.9
M00098	ERAS10_Day8	ERAS10	8	5	10	0.5
M00115	ERAS10_Day8	ERAS10	8	8	10	0.8
M00116	ERAS10_Day8	ERAS10	8	8	10	0.8
M00117	ERAS10_Day8	ERAS10	8	1	10	0.1
M00118	ERAS10_Day8	ERAS10	8	4	10	0.4
M00119	ERAS10_Day8	ERAS10	8	4	10	0.4
M00120	ERAS10_Day8	ERAS10	8	10	10	1
M00121	ERAS10_Day8	ERAS10	8	7	10	0.7
M00122	ERAS10_Day8	ERAS10	8	3	10	0.3
M00123	ERAS10_Day8	ERAS10	8	10	10	1
M00124	ERAS10_Day8	ERAS10	8	1	10	0.1
M00125	ERAS10_Day8	ERAS10	8	8	10	0.8
M00126	ERAS10_Day8	ERAS10	8	7	10	0.7
M00127	ERAS10_Day8	ERAS10	8	5	10	0.5
M00133	ERAS10_Day8	ERAS10	8	8	10	0.8
M00134	ERAS10_Day8	ERAS10	8	0	10	0
M00136	ERAS10_Day8	ERAS10	8	2	10	0.2
M00140	ERAS10_Day8	ERAS10	8	9	10	0.9
M00142	ERAS10_Day8	ERAS10	8	0	10	0
M00144	ERAS10_Day8	ERAS10	8	0	10	0
M00145	ERAS10_Day8	ERAS10	8	0	10	0
M00149	ERAS10_Day8	ERAS10	8	2	10	0.2
M00150	ERAS10_Day8	ERAS10	8	5	10	0.5
M00151	ERAS10_Day8	ERAS10	8	0	10	0
M00153	ERAS10_Day8	ERAS10	8	3	10	0.3
M00157	ERAS10_Day8	ERAS10	8	9	10	0.9
M00159	ERAS10_Day8	ERAS10	8	3	10	0.3
M00161	ERAS10_Day8	ERAS10	8	0	10	0
M00166	ERAS10_Day8	ERAS10	8	2	10	0.2
M00168	ERAS10_Day8	ERAS10	8	3	10	0.3
M00169	ERAS10_Day8	ERAS10	8	7	10	0.7
M00175	ERAS10_Day8	ERAS10	8	0	10	0
M00176	ERAS10_Day8	ERAS10	8	4	10	0.4
M00307	ERAS10_Day8	ERAS10	8	25	10	2.5
M00308	ERAS10_Day8	ERAS10	8	0	10	0
M00338	ERAS10_Day8	ERAS10	8	4	10	0.4
M00345	ERAS10_Day8	ERAS10	8	0	10	0
M00356	ERAS10_Day8	ERAS10	8	0	10	0
M00357	ERAS10_Day8	ERAS10	8	0	10	0
M00358	ERAS10_Day8	ERAS10	8	0	10	0
M00364	ERAS10_Day8	ERAS10	8	8	10	0.8
M00365	ERAS10_Day8	ERAS10	8	0	10	0
M00417	ERAS10_Day8	ERAS10	8	1	10	0.1
M00432	ERAS10_Day8	ERAS10	8	12	10	1.2
M00525	ERAS10_Day8	ERAS10	8	0	10	0
M00526	ERAS10_Day8	ERAS10	8	5	10	0.5
M00527	ERAS10_Day8	ERAS10	8	7	10	0.7
M00530	ERAS10_Day8	ERAS10	8	9	10	0.9
M00533	ERAS10_Day8	ERAS10	8	3	10	0.3
M00535	ERAS10_Day8	ERAS10	8	1	10	0.1
M00545	ERAS10_Day8	ERAS10	8	1	10	0.1
M00549	ERAS10_Day8	ERAS10	8	12	10	1.2
M00550	ERAS10_Day8	ERAS10	8	4	10	0.4
M00551	ERAS10_Day8	ERAS10	8	0	10	0
M00552	ERAS10_Day8	ERAS10	8	4	10	0.4
M00554	ERAS10_Day8	ERAS10	8	4	10	0.4
M00555	ERAS10_Day8	ERAS10	8	1	10	0.1
M00565	ERAS10_Day8	ERAS10	8	4	10	0.4
M00567	ERAS10_Day8	ERAS10	8	0	10	0
M00568	ERAS10_Day8	ERAS10	8	0	10	0
M00570	ERAS10_Day8	ERAS10	8	11	10	1.1
M00572	ERAS10_Day8	ERAS10	8	5	10	0.5
M00577	ERAS10_Day8	ERAS10	8	4	10	0.4
M00579	ERAS10_Day8	ERAS10	8	11	10	1.1
M00580	ERAS10_Day8	ERAS10	8	0	10	0
M00596	ERAS10_Day8	ERAS10	8	0	10	0
M00616	ERAS10_Day8	ERAS10	8	1	10	0.1
M00617	ERAS10_Day8	ERAS10	8	0	10	0
M00627	ERAS10_Day8	ERAS10	8	7	10	0.7
M00631	ERAS10_Day8	ERAS10	8	8	10	0.8
M00632	ERAS10_Day8	ERAS10	8	4	10	0.4
M00649	ERAS10_Day8	ERAS10	8	3	10	0.3
M00651	ERAS10_Day8	ERAS10	8	6	10	0.6
M00652	ERAS10_Day8	ERAS10	8	2	10	0.2
M00696	ERAS10_Day8	ERAS10	8	1	10	0.1
M00697	ERAS10_Day8	ERAS10	8	1	10	0.1
M00698	ERAS10_Day8	ERAS10	8	1	10	0.1
M00700	ERAS10_Day8	ERAS10	8	1	10	0.1
M00702	ERAS10_Day8	ERAS10	8	0	10	0
M00705	ERAS10_Day8	ERAS10	8	5	10	0.5
M00741	ERAS10_Day8	ERAS10	8	2	10	0.2
M00745	ERAS10_Day8	ERAS10	8	2	10	0.2
M00761	ERAS10_Day8	ERAS10	8	4	10	0.4
M00793	ERAS10_Day8	ERAS10	8	12	10	1.2
M00844	ERAS10_Day8	ERAS10	8	12	10	1.2
M00846	ERAS10_Day8	ERAS10	8	8	10	0.8
M00847	ERAS10_Day8	ERAS10	8	1	10	0.1
M00854	ERAS10_Day8	ERAS10	8	12	10	1.2
M00855	ERAS10_Day8	ERAS10	8	8	10	0.8
M00866	ERAS10_Day8	ERAS10	8	2	10	0.2
M00868	ERAS10_Day8	ERAS10	8	0	10	0
M00878	ERAS10_Day8	ERAS10	8	1	10	0.1
M00879	ERAS10_Day8	ERAS10	8	2	10	0.2
M00880	ERAS10_Day8	ERAS10	8	4	10	0.4
M00881	ERAS10_Day8	ERAS10	8	5	10	0.5
M00882	ERAS10_Day8	ERAS10	8	0	10	0
M00883	ERAS10_Day8	ERAS10	8	0	10	0
M00896	ERAS10_Day8	ERAS10	8	0	10	0
M00899	ERAS10_Day8	ERAS10	8	9	10	0.9
M00909	ERAS10_Day8	ERAS10	8	14	10	1.4
M00916	ERAS10_Day8	ERAS10	8	2	10	0.2
M00918	ERAS10_Day8	ERAS10	8	3	10	0.3
M00924	ERAS10_Day8	ERAS10	8	6	10	0.6
M00926	ERAS10_Day8	ERAS10	8	2	10	0.2
M00930	ERAS10_Day8	ERAS10	8	0	10	0
M00931	ERAS10_Day8	ERAS10	8	0	10	0
M00935	ERAS10_Day8	ERAS10	8	0	10	0
M00001	ERAS11_Day0	ERAS11	0	52	50	1.04
M00002	ERAS11_Day0	ERAS11	0	52	50	1.04
M00003	ERAS11_Day0	ERAS11	0	31	50	0.62
M00004	ERAS11_Day0	ERAS11	0	3	50	0.06
M00005	ERAS11_Day0	ERAS11	0	60	50	1.2
M00006	ERAS11_Day0	ERAS11	0	3	50	0.06
M00007	ERAS11_Day0	ERAS11	0	20	50	0.4
M00008	ERAS11_Day0	ERAS11	0	0	50	0
M00009	ERAS11_Day0	ERAS11	0	3	50	0.06
M00010	ERAS11_Day0	ERAS11	0	3	50	0.06
M00011	ERAS11_Day0	ERAS11	0	4	50	0.08
M00012	ERAS11_Day0	ERAS11	0	0	50	0
M00015	ERAS11_Day0	ERAS11	0	36	50	0.72
M00016	ERAS11_Day0	ERAS11	0	4	50	0.08
M00017	ERAS11_Day0	ERAS11	0	5	50	0.1
M00018	ERAS11_Day0	ERAS11	0	23	50	0.46
M00019	ERAS11_Day0	ERAS11	0	28	50	0.56
M00020	ERAS11_Day0	ERAS11	0	21	50	0.42
M00021	ERAS11_Day0	ERAS11	0	41	50	0.82
M00022	ERAS11_Day0	ERAS11	0	40	50	0.8
M00023	ERAS11_Day0	ERAS11	0	15	50	0.3
M00024	ERAS11_Day0	ERAS11	0	0	50	0
M00025	ERAS11_Day0	ERAS11	0	0	50	0
M00026	ERAS11_Day0	ERAS11	0	15	50	0.3
M00027	ERAS11_Day0	ERAS11	0	0	50	0
M00028	ERAS11_Day0	ERAS11	0	32	50	0.64
M00034	ERAS11_Day0	ERAS11	0	0	50	0
M00035	ERAS11_Day0	ERAS11	0	1	50	0.02
M00040	ERAS11_Day0	ERAS11	0	0	50	0
M00045	ERAS11_Day0	ERAS11	0	7	50	0.14
M00046	ERAS11_Day0	ERAS11	0	2	50	0.04
M00048	ERAS11_Day0	ERAS11	0	33	50	0.66
M00049	ERAS11_Day0	ERAS11	0	47	50	0.94
M00050	ERAS11_Day0	ERAS11	0	44	50	0.88
M00051	ERAS11_Day0	ERAS11	0	34	50	0.68
M00052	ERAS11_Day0	ERAS11	0	5	50	0.1
M00053	ERAS11_Day0	ERAS11	0	3	50	0.06
M00060	ERAS11_Day0	ERAS11	0	0	50	0
M00061	ERAS11_Day0	ERAS11	0	4	50	0.08
M00063	ERAS11_Day0	ERAS11	0	6	50	0.12
M00064	ERAS11_Day0	ERAS11	0	1	50	0.02
M00082	ERAS11_Day0	ERAS11	0	8	50	0.16
M00083	ERAS11_Day0	ERAS11	0	29	50	0.58
M00086	ERAS11_Day0	ERAS11	0	46	50	0.92
M00087	ERAS11_Day0	ERAS11	0	0	50	0
M00088	ERAS11_Day0	ERAS11	0	0	50	0
M00091	ERAS11_Day0	ERAS11	0	9	50	0.18
M00093	ERAS11_Day0	ERAS11	0	13	50	0.26
M00096	ERAS11_Day0	ERAS11	0	24	50	0.48
M00098	ERAS11_Day0	ERAS11	0	17	50	0.34
M00115	ERAS11_Day0	ERAS11	0	18	50	0.36
M00116	ERAS11_Day0	ERAS11	0	0	50	0
M00117	ERAS11_Day0	ERAS11	0	0	50	0
M00118	ERAS11_Day0	ERAS11	0	0	50	0
M00119	ERAS11_Day0	ERAS11	0	10	50	0.2
M00120	ERAS11_Day0	ERAS11	0	20	50	0.4
M00121	ERAS11_Day0	ERAS11	0	0	50	0
M00122	ERAS11_Day0	ERAS11	0	26	50	0.52
M00123	ERAS11_Day0	ERAS11	0	4	50	0.08
M00124	ERAS11_Day0	ERAS11	0	0	50	0
M00125	ERAS11_Day0	ERAS11	0	12	50	0.24
M00126	ERAS11_Day0	ERAS11	0	16	50	0.32
M00127	ERAS11_Day0	ERAS11	0	7	50	0.14
M00133	ERAS11_Day0	ERAS11	0	6	50	0.12
M00134	ERAS11_Day0	ERAS11	0	0	50	0
M00136	ERAS11_Day0	ERAS11	0	0	50	0
M00140	ERAS11_Day0	ERAS11	0	44	50	0.88
M00142	ERAS11_Day0	ERAS11	0	0	50	0
M00144	ERAS11_Day0	ERAS11	0	6	50	0.12
M00145	ERAS11_Day0	ERAS11	0	0	50	0
M00149	ERAS11_Day0	ERAS11	0	0	50	0
M00150	ERAS11_Day0	ERAS11	0	0	50	0
M00151	ERAS11_Day0	ERAS11	0	0	50	0
M00153	ERAS11_Day0	ERAS11	0	0	50	0
M00157	ERAS11_Day0	ERAS11	0	43	50	0.86
M00159	ERAS11_Day0	ERAS11	0	9	50	0.18
M00161	ERAS11_Day0	ERAS11	0	0	50	0
M00166	ERAS11_Day0	ERAS11	0	0	50	0
M00168	ERAS11_Day0	ERAS11	0	3	50	0.06
M00169	ERAS11_Day0	ERAS11	0	4	50	0.08
M00175	ERAS11_Day0	ERAS11	0	0	50	0
M00176	ERAS11_Day0	ERAS11	0	0	50	0
M00307	ERAS11_Day0	ERAS11	0	67	50	1.34
M00308	ERAS11_Day0	ERAS11	0	0	50	0
M00338	ERAS11_Day0	ERAS11	0	0	50	0
M00345	ERAS11_Day0	ERAS11	0	3	50	0.06
M00356	ERAS11_Day0	ERAS11	0	1	50	0.02
M00357	ERAS11_Day0	ERAS11	0	1	50	0.02
M00358	ERAS11_Day0	ERAS11	0	1	50	0.02
M00364	ERAS11_Day0	ERAS11	0	10	50	0.2
M00365	ERAS11_Day0	ERAS11	0	6	50	0.12
M00417	ERAS11_Day0	ERAS11	0	0	50	0
M00432	ERAS11_Day0	ERAS11	0	25	50	0.5
M00525	ERAS11_Day0	ERAS11	0	0	50	0
M00526	ERAS11_Day0	ERAS11	0	16	50	0.32
M00527	ERAS11_Day0	ERAS11	0	24	50	0.48
M00530	ERAS11_Day0	ERAS11	0	0	50	0
M00533	ERAS11_Day0	ERAS11	0	0	50	0
M00535	ERAS11_Day0	ERAS11	0	4	50	0.08
M00545	ERAS11_Day0	ERAS11	0	0	50	0
M00549	ERAS11_Day0	ERAS11	0	14	50	0.28
M00550	ERAS11_Day0	ERAS11	0	0	50	0
M00551	ERAS11_Day0	ERAS11	0	0	50	0
M00552	ERAS11_Day0	ERAS11	0	0	50	0
M00554	ERAS11_Day0	ERAS11	0	4	50	0.08
M00555	ERAS11_Day0	ERAS11	0	0	50	0
M00565	ERAS11_Day0	ERAS11	0	0	50	0
M00567	ERAS11_Day0	ERAS11	0	1	50	0.02
M00568	ERAS11_Day0	ERAS11	0	0	50	0
M00570	ERAS11_Day0	ERAS11	0	28	50	0.56
M00572	ERAS11_Day0	ERAS11	0	1	50	0.02
M00577	ERAS11_Day0	ERAS11	0	1	50	0.02
M00579	ERAS11_Day0	ERAS11	0	23	50	0.46
M00580	ERAS11_Day0	ERAS11	0	3	50	0.06
M00596	ERAS11_Day0	ERAS11	0	0	50	0
M00616	ERAS11_Day0	ERAS11	0	0	50	0
M00617	ERAS11_Day0	ERAS11	0	3	50	0.06
M00627	ERAS11_Day0	ERAS11	0	18	50	0.36
M00631	ERAS11_Day0	ERAS11	0	10	50	0.2
M00632	ERAS11_Day0	ERAS11	0	4	50	0.08
M00649	ERAS11_Day0	ERAS11	0	0	50	0
M00651	ERAS11_Day0	ERAS11	0	15	50	0.3
M00652	ERAS11_Day0	ERAS11	0	1	50	0.02
M00696	ERAS11_Day0	ERAS11	0	0	50	0
M00697	ERAS11_Day0	ERAS11	0	0	50	0
M00698	ERAS11_Day0	ERAS11	0	0	50	0
M00700	ERAS11_Day0	ERAS11	0	0	50	0
M00702	ERAS11_Day0	ERAS11	0	0	50	0
M00705	ERAS11_Day0	ERAS11	0	21	50	0.42
M00741	ERAS11_Day0	ERAS11	0	4	50	0.08
M00745	ERAS11_Day0	ERAS11	0	0	50	0
M00761	ERAS11_Day0	ERAS11	0	0	50	0
M00793	ERAS11_Day0	ERAS11	0	31	50	0.62
M00844	ERAS11_Day0	ERAS11	0	36	50	0.72
M00846	ERAS11_Day0	ERAS11	0	9	50	0.18
M00847	ERAS11_Day0	ERAS11	0	0	50	0
M00854	ERAS11_Day0	ERAS11	0	67	50	1.34
M00855	ERAS11_Day0	ERAS11	0	24	50	0.48
M00866	ERAS11_Day0	ERAS11	0	1	50	0.02
M00868	ERAS11_Day0	ERAS11	0	0	50	0
M00878	ERAS11_Day0	ERAS11	0	0	50	0
M00879	ERAS11_Day0	ERAS11	0	0	50	0
M00880	ERAS11_Day0	ERAS11	0	0	50	0
M00881	ERAS11_Day0	ERAS11	0	3	50	0.06
M00882	ERAS11_Day0	ERAS11	0	0	50	0
M00883	ERAS11_Day0	ERAS11	0	0	50	0
M00896	ERAS11_Day0	ERAS11	0	0	50	0
M00899	ERAS11_Day0	ERAS11	0	23	50	0.46
M00909	ERAS11_Day0	ERAS11	0	23	50	0.46
M00916	ERAS11_Day0	ERAS11	0	14	50	0.28
M00918	ERAS11_Day0	ERAS11	0	0	50	0
M00924	ERAS11_Day0	ERAS11	0	10	50	0.2
M00926	ERAS11_Day0	ERAS11	0	0	50	0
M00930	ERAS11_Day0	ERAS11	0	1	50	0.02
M00931	ERAS11_Day0	ERAS11	0	0	50	0
M00935	ERAS11_Day0	ERAS11	0	1	50	0.02
M00001	ERAS11_Day180	ERAS11	180	50	50	1
M00002	ERAS11_Day180	ERAS11	180	50	50	1
M00003	ERAS11_Day180	ERAS11	180	34	50	0.68
M00004	ERAS11_Day180	ERAS11	180	6	50	0.12
M00005	ERAS11_Day180	ERAS11	180	60	50	1.2
M00006	ERAS11_Day180	ERAS11	180	6	50	0.12
M00007	ERAS11_Day180	ERAS11	180	21	50	0.42
M00008	ERAS11_Day180	ERAS11	180	0	50	0
M00009	ERAS11_Day180	ERAS11	180	2	50	0.04
M00010	ERAS11_Day180	ERAS11	180	2	50	0.04
M00011	ERAS11_Day180	ERAS11	180	8	50	0.16
M00012	ERAS11_Day180	ERAS11	180	0	50	0
M00015	ERAS11_Day180	ERAS11	180	38	50	0.76
M00016	ERAS11_Day180	ERAS11	180	3	50	0.06
M00017	ERAS11_Day180	ERAS11	180	5	50	0.1
M00018	ERAS11_Day180	ERAS11	180	23	50	0.46
M00019	ERAS11_Day180	ERAS11	180	29	50	0.58
M00020	ERAS11_Day180	ERAS11	180	26	50	0.52
M00021	ERAS11_Day180	ERAS11	180	46	50	0.92
M00022	ERAS11_Day180	ERAS11	180	44	50	0.88
M00023	ERAS11_Day180	ERAS11	180	18	50	0.36
M00024	ERAS11_Day180	ERAS11	180	0	50	0
M00025	ERAS11_Day180	ERAS11	180	0	50	0
M00026	ERAS11_Day180	ERAS11	180	22	50	0.44
M00027	ERAS11_Day180	ERAS11	180	0	50	0
M00028	ERAS11_Day180	ERAS11	180	32	50	0.64
M00034	ERAS11_Day180	ERAS11	180	0	50	0
M00035	ERAS11_Day180	ERAS11	180	1	50	0.02
M00040	ERAS11_Day180	ERAS11	180	0	50	0
M00045	ERAS11_Day180	ERAS11	180	14	50	0.28
M00046	ERAS11_Day180	ERAS11	180	1	50	0.02
M00048	ERAS11_Day180	ERAS11	180	40	50	0.8
M00049	ERAS11_Day180	ERAS11	180	44	50	0.88
M00050	ERAS11_Day180	ERAS11	180	43	50	0.86
M00051	ERAS11_Day180	ERAS11	180	41	50	0.82
M00052	ERAS11_Day180	ERAS11	180	5	50	0.1
M00053	ERAS11_Day180	ERAS11	180	3	50	0.06
M00060	ERAS11_Day180	ERAS11	180	0	50	0
M00061	ERAS11_Day180	ERAS11	180	3	50	0.06
M00063	ERAS11_Day180	ERAS11	180	13	50	0.26
M00064	ERAS11_Day180	ERAS11	180	1	50	0.02
M00082	ERAS11_Day180	ERAS11	180	14	50	0.28
M00083	ERAS11_Day180	ERAS11	180	40	50	0.8
M00086	ERAS11_Day180	ERAS11	180	53	50	1.06
M00087	ERAS11_Day180	ERAS11	180	0	50	0
M00088	ERAS11_Day180	ERAS11	180	0	50	0
M00091	ERAS11_Day180	ERAS11	180	10	50	0.2
M00093	ERAS11_Day180	ERAS11	180	22	50	0.44
M00096	ERAS11_Day180	ERAS11	180	29	50	0.58
M00098	ERAS11_Day180	ERAS11	180	13	50	0.26
M00115	ERAS11_Day180	ERAS11	180	22	50	0.44
M00116	ERAS11_Day180	ERAS11	180	0	50	0
M00117	ERAS11_Day180	ERAS11	180	0	50	0
M00118	ERAS11_Day180	ERAS11	180	0	50	0
M00119	ERAS11_Day180	ERAS11	180	18	50	0.36
M00120	ERAS11_Day180	ERAS11	180	27	50	0.54
M00121	ERAS11_Day180	ERAS11	180	1	50	0.02
M00122	ERAS11_Day180	ERAS11	180	26	50	0.52
M00123	ERAS11_Day180	ERAS11	180	10	50	0.2
M00124	ERAS11_Day180	ERAS11	180	0	50	0
M00125	ERAS11_Day180	ERAS11	180	20	50	0.4
M00126	ERAS11_Day180	ERAS11	180	21	50	0.42
M00127	ERAS11_Day180	ERAS11	180	12	50	0.24
M00133	ERAS11_Day180	ERAS11	180	6	50	0.12
M00134	ERAS11_Day180	ERAS11	180	0	50	0
M00136	ERAS11_Day180	ERAS11	180	0	50	0
M00140	ERAS11_Day180	ERAS11	180	46	50	0.92
M00142	ERAS11_Day180	ERAS11	180	0	50	0
M00144	ERAS11_Day180	ERAS11	180	20	50	0.4
M00145	ERAS11_Day180	ERAS11	180	0	50	0
M00149	ERAS11_Day180	ERAS11	180	0	50	0
M00150	ERAS11_Day180	ERAS11	180	0	50	0
M00151	ERAS11_Day180	ERAS11	180	0	50	0
M00153	ERAS11_Day180	ERAS11	180	0	50	0
M00157	ERAS11_Day180	ERAS11	180	37	50	0.74
M00159	ERAS11_Day180	ERAS11	180	8	50	0.16
M00161	ERAS11_Day180	ERAS11	180	0	50	0
M00166	ERAS11_Day180	ERAS11	180	0	50	0
M00168	ERAS11_Day180	ERAS11	180	1	50	0.02
M00169	ERAS11_Day180	ERAS11	180	11	50	0.22
M00175	ERAS11_Day180	ERAS11	180	0	50	0
M00176	ERAS11_Day180	ERAS11	180	0	50	0
M00307	ERAS11_Day180	ERAS11	180	66	50	1.32
M00308	ERAS11_Day180	ERAS11	180	0	50	0
M00338	ERAS11_Day180	ERAS11	180	0	50	0
M00345	ERAS11_Day180	ERAS11	180	2	50	0.04
M00356	ERAS11_Day180	ERAS11	180	0	50	0
M00357	ERAS11_Day180	ERAS11	180	0	50	0
M00358	ERAS11_Day180	ERAS11	180	0	50	0
M00364	ERAS11_Day180	ERAS11	180	11	50	0.22
M00365	ERAS11_Day180	ERAS11	180	6	50	0.12
M00417	ERAS11_Day180	ERAS11	180	0	50	0
M00432	ERAS11_Day180	ERAS11	180	27	50	0.54
M00525	ERAS11_Day180	ERAS11	180	0	50	0
M00526	ERAS11_Day180	ERAS11	180	17	50	0.34
M00527	ERAS11_Day180	ERAS11	180	35	50	0.7
M00530	ERAS11_Day180	ERAS11	180	1	50	0.02
M00533	ERAS11_Day180	ERAS11	180	0	50	0
M00535	ERAS11_Day180	ERAS11	180	8	50	0.16
M00545	ERAS11_Day180	ERAS11	180	0	50	0
M00549	ERAS11_Day180	ERAS11	180	11	50	0.22
M00550	ERAS11_Day180	ERAS11	180	0	50	0
M00551	ERAS11_Day180	ERAS11	180	0	50	0
M00552	ERAS11_Day180	ERAS11	180	0	50	0
M00554	ERAS11_Day180	ERAS11	180	2	50	0.04
M00555	ERAS11_Day180	ERAS11	180	0	50	0
M00565	ERAS11_Day180	ERAS11	180	0	50	0
M00567	ERAS11_Day180	ERAS11	180	0	50	0
M00568	ERAS11_Day180	ERAS11	180	0	50	0
M00570	ERAS11_Day180	ERAS11	180	26	50	0.52
M00572	ERAS11_Day180	ERAS11	180	8	50	0.16
M00577	ERAS11_Day180	ERAS11	180	1	50	0.02
M00579	ERAS11_Day180	ERAS11	180	27	50	0.54
M00580	ERAS11_Day180	ERAS11	180	2	50	0.04
M00596	ERAS11_Day180	ERAS11	180	0	50	0
M00616	ERAS11_Day180	ERAS11	180	0	50	0
M00617	ERAS11_Day180	ERAS11	180	0	50	0
M00627	ERAS11_Day180	ERAS11	180	23	50	0.46
M00631	ERAS11_Day180	ERAS11	180	13	50	0.26
M00632	ERAS11_Day180	ERAS11	180	2	50	0.04
M00649	ERAS11_Day180	ERAS11	180	0	50	0
M00651	ERAS11_Day180	ERAS11	180	15	50	0.3
M00652	ERAS11_Day180	ERAS11	180	1	50	0.02
M00696	ERAS11_Day180	ERAS11	180	0	50	0
M00697	ERAS11_Day180	ERAS11	180	0	50	0
M00698	ERAS11_Day180	ERAS11	180	0	50	0
M00700	ERAS11_Day180	ERAS11	180	0	50	0
M00702	ERAS11_Day180	ERAS11	180	0	50	0
M00705	ERAS11_Day180	ERAS11	180	19	50	0.38
M00741	ERAS11_Day180	ERAS11	180	12	50	0.24
M00745	ERAS11_Day180	ERAS11	180	0	50	0
M00761	ERAS11_Day180	ERAS11	180	0	50	0
M00793	ERAS11_Day180	ERAS11	180	32	50	0.64
M00844	ERAS11_Day180	ERAS11	180	38	50	0.76
M00846	ERAS11_Day180	ERAS11	180	6	50	0.12
M00847	ERAS11_Day180	ERAS11	180	0	50	0
M00854	ERAS11_Day180	ERAS11	180	68	50	1.36
M00855	ERAS11_Day180	ERAS11	180	23	50	0.46
M00866	ERAS11_Day180	ERAS11	180	1	50	0.02
M00868	ERAS11_Day180	ERAS11	180	0	50	0
M00878	ERAS11_Day180	ERAS11	180	0	50	0
M00879	ERAS11_Day180	ERAS11	180	0	50	0
M00880	ERAS11_Day180	ERAS11	180	0	50	0
M00881	ERAS11_Day180	ERAS11	180	10	50	0.2
M00882	ERAS11_Day180	ERAS11	180	1	50	0.02
M00883	ERAS11_Day180	ERAS11	180	0	50	0
M00896	ERAS11_Day180	ERAS11	180	3	50	0.06
M00899	ERAS11_Day180	ERAS11	180	19	50	0.38
M00909	ERAS11_Day180	ERAS11	180	18	50	0.36
M00916	ERAS11_Day180	ERAS11	180	8	50	0.16
M00918	ERAS11_Day180	ERAS11	180	0	50	0
M00924	ERAS11_Day180	ERAS11	180	6	50	0.12
M00926	ERAS11_Day180	ERAS11	180	0	50	0
M00930	ERAS11_Day180	ERAS11	180	2	50	0.04
M00931	ERAS11_Day180	ERAS11	180	0	50	0
M00935	ERAS11_Day180	ERAS11	180	0	50	0
M00001	ERAS11_Day42	ERAS11	42	31	30	1.03333
M00002	ERAS11_Day42	ERAS11	42	31	30	1.03333
M00003	ERAS11_Day42	ERAS11	42	25	30	0.833333
M00004	ERAS11_Day42	ERAS11	42	5	30	0.166667
M00005	ERAS11_Day42	ERAS11	42	40	30	1.33333
M00006	ERAS11_Day42	ERAS11	42	5	30	0.166667
M00007	ERAS11_Day42	ERAS11	42	15	30	0.5
M00008	ERAS11_Day42	ERAS11	42	0	30	0
M00009	ERAS11_Day42	ERAS11	42	1	30	0.0333333
M00010	ERAS11_Day42	ERAS11	42	1	30	0.0333333
M00011	ERAS11_Day42	ERAS11	42	5	30	0.166667
M00012	ERAS11_Day42	ERAS11	42	0	30	0
M00015	ERAS11_Day42	ERAS11	42	23	30	0.766667
M00016	ERAS11_Day42	ERAS11	42	3	30	0.1
M00017	ERAS11_Day42	ERAS11	42	3	30	0.1
M00018	ERAS11_Day42	ERAS11	42	16	30	0.533333
M00019	ERAS11_Day42	ERAS11	42	18	30	0.6
M00020	ERAS11_Day42	ERAS11	42	21	30	0.7
M00021	ERAS11_Day42	ERAS11	42	29	30	0.966667
M00022	ERAS11_Day42	ERAS11	42	24	30	0.8
M00023	ERAS11_Day42	ERAS11	42	11	30	0.366667
M00024	ERAS11_Day42	ERAS11	42	0	30	0
M00025	ERAS11_Day42	ERAS11	42	0	30	0
M00026	ERAS11_Day42	ERAS11	42	13	30	0.433333
M00027	ERAS11_Day42	ERAS11	42	0	30	0
M00028	ERAS11_Day42	ERAS11	42	21	30	0.7
M00034	ERAS11_Day42	ERAS11	42	0	30	0
M00035	ERAS11_Day42	ERAS11	42	0	30	0
M00040	ERAS11_Day42	ERAS11	42	0	30	0
M00045	ERAS11_Day42	ERAS11	42	8	30	0.266667
M00046	ERAS11_Day42	ERAS11	42	0	30	0
M00048	ERAS11_Day42	ERAS11	42	22	30	0.733333
M00049	ERAS11_Day42	ERAS11	42	29	30	0.966667
M00050	ERAS11_Day42	ERAS11	42	29	30	0.966667
M00051	ERAS11_Day42	ERAS11	42	25	30	0.833333
M00052	ERAS11_Day42	ERAS11	42	6	30	0.2
M00053	ERAS11_Day42	ERAS11	42	1	30	0.0333333
M00060	ERAS11_Day42	ERAS11	42	0	30	0
M00061	ERAS11_Day42	ERAS11	42	2	30	0.0666667
M00063	ERAS11_Day42	ERAS11	42	12	30	0.4
M00064	ERAS11_Day42	ERAS11	42	2	30	0.0666667
M00082	ERAS11_Day42	ERAS11	42	8	30	0.266667
M00083	ERAS11_Day42	ERAS11	42	41	30	1.36667
M00086	ERAS11_Day42	ERAS11	42	32	30	1.06667
M00087	ERAS11_Day42	ERAS11	42	0	30	0
M00088	ERAS11_Day42	ERAS11	42	0	30	0
M00091	ERAS11_Day42	ERAS11	42	8	30	0.266667
M00093	ERAS11_Day42	ERAS11	42	15	30	0.5
M00096	ERAS11_Day42	ERAS11	42	14	30	0.466667
M00098	ERAS11_Day42	ERAS11	42	14	30	0.466667
M00115	ERAS11_Day42	ERAS11	42	13	30	0.433333
M00116	ERAS11_Day42	ERAS11	42	1	30	0.0333333
M00117	ERAS11_Day42	ERAS11	42	0	30	0
M00118	ERAS11_Day42	ERAS11	42	0	30	0
M00119	ERAS11_Day42	ERAS11	42	12	30	0.4
M00120	ERAS11_Day42	ERAS11	42	18	30	0.6
M00121	ERAS11_Day42	ERAS11	42	1	30	0.0333333
M00122	ERAS11_Day42	ERAS11	42	16	30	0.533333
M00123	ERAS11_Day42	ERAS11	42	6	30	0.2
M00124	ERAS11_Day42	ERAS11	42	0	30	0
M00125	ERAS11_Day42	ERAS11	42	15	30	0.5
M00126	ERAS11_Day42	ERAS11	42	12	30	0.4
M00127	ERAS11_Day42	ERAS11	42	10	30	0.333333
M00133	ERAS11_Day42	ERAS11	42	3	30	0.1
M00134	ERAS11_Day42	ERAS11	42	0	30	0
M00136	ERAS11_Day42	ERAS11	42	0	30	0
M00140	ERAS11_Day42	ERAS11	42	26	30	0.866667
M00142	ERAS11_Day42	ERAS11	42	0	30	0
M00144	ERAS11_Day42	ERAS11	42	16	30	0.533333
M00145	ERAS11_Day42	ERAS11	42	0	30	0
M00149	ERAS11_Day42	ERAS11	42	0	30	0
M00150	ERAS11_Day42	ERAS11	42	0	30	0
M00151	ERAS11_Day42	ERAS11	42	0	30	0
M00153	ERAS11_Day42	ERAS11	42	0	30	0
M00157	ERAS11_Day42	ERAS11	42	30	30	1
M00159	ERAS11_Day42	ERAS11	42	2	30	0.0666667
M00161	ERAS11_Day42	ERAS11	42	0	30	0
M00166	ERAS11_Day42	ERAS11	42	0	30	0
M00168	ERAS11_Day42	ERAS11	42	0	30	0
M00169	ERAS11_Day42	ERAS11	42	7	30	0.233333
M00175	ERAS11_Day42	ERAS11	42	0	30	0
M00176	ERAS11_Day42	ERAS11	42	0	30	0
M00307	ERAS11_Day42	ERAS11	42	47	30	1.56667
M00308	ERAS11_Day42	ERAS11	42	0	30	0
M00338	ERAS11_Day42	ERAS11	42	0	30	0
M00345	ERAS11_Day42	ERAS11	42	0	30	0
M00356	ERAS11_Day42	ERAS11	42	0	30	0
M00357	ERAS11_Day42	ERAS11	42	0	30	0
M00358	ERAS11_Day42	ERAS11	42	0	30	0
M00364	ERAS11_Day42	ERAS11	42	8	30	0.266667
M00365	ERAS11_Day42	ERAS11	42	6	30	0.2
M00417	ERAS11_Day42	ERAS11	42	0	30	0
M00432	ERAS11_Day42	ERAS11	42	16	30	0.533333
M00525	ERAS11_Day42	ERAS11	42	0	30	0
M00526	ERAS11_Day42	ERAS11	42	11	30	0.366667
M00527	ERAS11_Day42	ERAS11	42	24	30	0.8
M00530	ERAS11_Day42	ERAS11	42	0	30	0
M00533	ERAS11_Day42	ERAS11	42	0	30	0
M00535	ERAS11_Day42	ERAS11	42	7	30	0.233333
M00545	ERAS11_Day42	ERAS11	42	0	30	0
M00549	ERAS11_Day42	ERAS11	42	8	30	0.266667
M00550	ERAS11_Day42	ERAS11	42	0	30	0
M00551	ERAS11_Day42	ERAS11	42	0	30	0
M00552	ERAS11_Day42	ERAS11	42	0	30	0
M00554	ERAS11_Day42	ERAS11	42	0	30	0
M00555	ERAS11_Day42	ERAS11	42	0	30	0
M00565	ERAS11_Day42	ERAS11	42	0	30	0
M00567	ERAS11_Day42	ERAS11	42	0	30	0
M00568	ERAS11_Day42	ERAS11	42	0	30	0
M00570	ERAS11_Day42	ERAS11	42	18	30	0.6
M00572	ERAS11_Day42	ERAS11	42	5	30	0.166667
M00577	ERAS11_Day42	ERAS11	42	1	30	0.0333333
M00579	ERAS11_Day42	ERAS11	42	13	30	0.433333
M00580	ERAS11_Day42	ERAS11	42	0	30	0
M00596	ERAS11_Day42	ERAS11	42	0	30	0
M00616	ERAS11_Day42	ERAS11	42	0	30	0
M00617	ERAS11_Day42	ERAS11	42	0	30	0
M00627	ERAS11_Day42	ERAS11	42	14	30	0.466667
M00631	ERAS11_Day42	ERAS11	42	11	30	0.366667
M00632	ERAS11_Day42	ERAS11	42	0	30	0
M00649	ERAS11_Day42	ERAS11	42	0	30	0
M00651	ERAS11_Day42	ERAS11	42	12	30	0.4
M00652	ERAS11_Day42	ERAS11	42	1	30	0.0333333
M00696	ERAS11_Day42	ERAS11	42	0	30	0
M00697	ERAS11_Day42	ERAS11	42	0	30	0
M00698	ERAS11_Day42	ERAS11	42	0	30	0
M00700	ERAS11_Day42	ERAS11	42	0	30	0
M00702	ERAS11_Day42	ERAS11	42	0	30	0
M00705	ERAS11_Day42	ERAS11	42	9	30	0.3
M00741	ERAS11_Day42	ERAS11	42	9	30	0.3
M00745	ERAS11_Day42	ERAS11	42	0	30	0
M00761	ERAS11_Day42	ERAS11	42	0	30	0
M00793	ERAS11_Day42	ERAS11	42	22	30	0.733333
M00844	ERAS11_Day42	ERAS11	42	22	30	0.733333
M00846	ERAS11_Day42	ERAS11	42	5	30	0.166667
M00847	ERAS11_Day42	ERAS11	42	0	30	0
M00854	ERAS11_Day42	ERAS11	42	42	30	1.4
M00855	ERAS11_Day42	ERAS11	42	18	30	0.6
M00866	ERAS11_Day42	ERAS11	42	1	30	0.0333333
M00868	ERAS11_Day42	ERAS11	42	0	30	0
M00878	ERAS11_Day42	ERAS11	42	0	30	0
M00879	ERAS11_Day42	ERAS11	42	0	30	0
M00880	ERAS11_Day42	ERAS11	42	0	30	0
M00881	ERAS11_Day42	ERAS11	42	6	30	0.2
M00882	ERAS11_Day42	ERAS11	42	0	30	0
M00883	ERAS11_Day42	ERAS11	42	0	30	0
M00896	ERAS11_Day42	ERAS11	42	2	30	0.0666667
M00899	ERAS11_Day42	ERAS11	42	10	30	0.333333
M00909	ERAS11_Day42	ERAS11	42	11	30	0.366667
M00916	ERAS11_Day42	ERAS11	42	3	30	0.1
M00918	ERAS11_Day42	ERAS11	42	0	30	0
M00924	ERAS11_Day42	ERAS11	42	5	30	0.166667
M00926	ERAS11_Day42	ERAS11	42	0	30	0
M00930	ERAS11_Day42	ERAS11	42	2	30	0.0666667
M00931	ERAS11_Day42	ERAS11	42	0	30	0
M00935	ERAS11_Day42	ERAS11	42	0	30	0
M00001	ERAS11_Day4opt	ERAS11	4	4	8	0.5
M00002	ERAS11_Day4opt	ERAS11	4	4	8	0.5
M00003	ERAS11_Day4opt	ERAS11	4	3	8	0.375
M00004	ERAS11_Day4opt	ERAS11	4	1	8	0.125
M00005	ERAS11_Day4opt	ERAS11	4	10	8	1.25
M00006	ERAS11_Day4opt	ERAS11	4	1	8	0.125
M00007	ERAS11_Day4opt	ERAS11	4	3	8	0.375
M00008	ERAS11_Day4opt	ERAS11	4	0	8	0
M00009	ERAS11_Day4opt	ERAS11	4	0	8	0
M00010	ERAS11_Day4opt	ERAS11	4	0	8	0
M00011	ERAS11_Day4opt	ERAS11	4	0	8	0
M00012	ERAS11_Day4opt	ERAS11	4	0	8	0
M00015	ERAS11_Day4opt	ERAS11	4	3	8	0.375
M00016	ERAS11_Day4opt	ERAS11	4	0	8	0
M00017	ERAS11_Day4opt	ERAS11	4	1	8	0.125
M00018	ERAS11_Day4opt	ERAS11	4	2	8	0.25
M00019	ERAS11_Day4opt	ERAS11	4	2	8	0.25
M00020	ERAS11_Day4opt	ERAS11	4	4	8	0.5
M00021	ERAS11_Day4opt	ERAS11	4	5	8	0.625
M00022	ERAS11_Day4opt	ERAS11	4	5	8	0.625
M00023	ERAS11_Day4opt	ERAS11	4	0	8	0
M00024	ERAS11_Day4opt	ERAS11	4	0	8	0
M00025	ERAS11_Day4opt	ERAS11	4	0	8	0
M00026	ERAS11_Day4opt	ERAS11	4	3	8	0.375
M00027	ERAS11_Day4opt	ERAS11	4	0	8	0
M00028	ERAS11_Day4opt	ERAS11	4	5	8	0.625
M00034	ERAS11_Day4opt	ERAS11	4	0	8	0
M00035	ERAS11_Day4opt	ERAS11	4	0	8	0
M00040	ERAS11_Day4opt	ERAS11	4	0	8	0
M00045	ERAS11_Day4opt	ERAS11	4	0	8	0
M00046	ERAS11_Day4opt	ERAS11	4	0	8	0
M00048	ERAS11_Day4opt	ERAS11	4	5	8	0.625
M00049	ERAS11_Day4opt	ERAS11	4	7	8	0.875
M00050	ERAS11_Day4opt	ERAS11	4	5	8	0.625
M00051	ERAS11_Day4opt	ERAS11	4	5	8	0.625
M00052	ERAS11_Day4opt	ERAS11	4	1	8	0.125
M00053	ERAS11_Day4opt	ERAS11	4	1	8	0.125
M00060	ERAS11_Day4opt	ERAS11	4	0	8	0
M00061	ERAS11_Day4opt	ERAS11	4	0	8	0
M00063	ERAS11_Day4opt	ERAS11	4	0	8	0
M00064	ERAS11_Day4opt	ERAS11	4	0	8	0
M00082	ERAS11_Day4opt	ERAS11	4	1	8	0.125
M00083	ERAS11_Day4opt	ERAS11	4	4	8	0.5
M00086	ERAS11_Day4opt	ERAS11	4	1	8	0.125
M00087	ERAS11_Day4opt	ERAS11	4	0	8	0
M00088	ERAS11_Day4opt	ERAS11	4	0	8	0
M00091	ERAS11_Day4opt	ERAS11	4	0	8	0
M00093	ERAS11_Day4opt	ERAS11	4	2	8	0.25
M00096	ERAS11_Day4opt	ERAS11	4	2	8	0.25
M00098	ERAS11_Day4opt	ERAS11	4	1	8	0.125
M00115	ERAS11_Day4opt	ERAS11	4	2	8	0.25
M00116	ERAS11_Day4opt	ERAS11	4	0	8	0
M00117	ERAS11_Day4opt	ERAS11	4	0	8	0
M00118	ERAS11_Day4opt	ERAS11	4	0	8	0
M00119	ERAS11_Day4opt	ERAS11	4	0	8	0
M00120	ERAS11_Day4opt	ERAS11	4	2	8	0.25
M00121	ERAS11_Day4opt	ERAS11	4	0	8	0
M00122	ERAS11_Day4opt	ERAS11	4	0	8	0
M00123	ERAS11_Day4opt	ERAS11	4	1	8	0.125
M00124	ERAS11_Day4opt	ERAS11	4	0	8	0
M00125	ERAS11_Day4opt	ERAS11	4	2	8	0.25
M00126	ERAS11_Day4opt	ERAS11	4	0	8	0
M00127	ERAS11_Day4opt	ERAS11	4	0	8	0
M00133	ERAS11_Day4opt	ERAS11	4	0	8	0
M00134	ERAS11_Day4opt	ERAS11	4	0	8	0
M00136	ERAS11_Day4opt	ERAS11	4	0	8	0
M00140	ERAS11_Day4opt	ERAS11	4	8	8	1
M00142	ERAS11_Day4opt	ERAS11	4	0	8	0
M00144	ERAS11_Day4opt	ERAS11	4	0	8	0
M00145	ERAS11_Day4opt	ERAS11	4	1	8	0.125
M00149	ERAS11_Day4opt	ERAS11	4	0	8	0
M00150	ERAS11_Day4opt	ERAS11	4	0	8	0
M00151	ERAS11_Day4opt	ERAS11	4	0	8	0
M00153	ERAS11_Day4opt	ERAS11	4	0	8	0
M00157	ERAS11_Day4opt	ERAS11	4	6	8	0.75
M00159	ERAS11_Day4opt	ERAS11	4	2	8	0.25
M00161	ERAS11_Day4opt	ERAS11	4	1	8	0.125
M00166	ERAS11_Day4opt	ERAS11	4	0	8	0
M00168	ERAS11_Day4opt	ERAS11	4	0	8	0
M00169	ERAS11_Day4opt	ERAS11	4	2	8	0.25
M00175	ERAS11_Day4opt	ERAS11	4	0	8	0
M00176	ERAS11_Day4opt	ERAS11	4	0	8	0
M00307	ERAS11_Day4opt	ERAS11	4	7	8	0.875
M00308	ERAS11_Day4opt	ERAS11	4	1	8	0.125
M00338	ERAS11_Day4opt	ERAS11	4	0	8	0
M00345	ERAS11_Day4opt	ERAS11	4	0	8	0
M00356	ERAS11_Day4opt	ERAS11	4	0	8	0
M00357	ERAS11_Day4opt	ERAS11	4	0	8	0
M00358	ERAS11_Day4opt	ERAS11	4	0	8	0
M00364	ERAS11_Day4opt	ERAS11	4	0	8	0
M00365	ERAS11_Day4opt	ERAS11	4	0	8	0
M00417	ERAS11_Day4opt	ERAS11	4	0	8	0
M00432	ERAS11_Day4opt	ERAS11	4	2	8	0.25
M00525	ERAS11_Day4opt	ERAS11	4	1	8	0.125
M00526	ERAS11_Day4opt	ERAS11	4	3	8	0.375
M00527	ERAS11_Day4opt	ERAS11	4	2	8	0.25
M00530	ERAS11_Day4opt	ERAS11	4	0	8	0
M00533	ERAS11_Day4opt	ERAS11	4	0	8	0
M00535	ERAS11_Day4opt	ERAS11	4	0	8	0
M00545	ERAS11_Day4opt	ERAS11	4	0	8	0
M00549	ERAS11_Day4opt	ERAS11	4	3	8	0.375
M00550	ERAS11_Day4opt	ERAS11	4	0	8	0
M00551	ERAS11_Day4opt	ERAS11	4	0	8	0
M00552	ERAS11_Day4opt	ERAS11	4	0	8	0
M00554	ERAS11_Day4opt	ERAS11	4	0	8	0
M00555	ERAS11_Day4opt	ERAS11	4	0	8	0
M00565	ERAS11_Day4opt	ERAS11	4	0	8	0
M00567	ERAS11_Day4opt	ERAS11	4	0	8	0
M00568	ERAS11_Day4opt	ERAS11	4	0	8	0
M00570	ERAS11_Day4opt	ERAS11	4	0	8	0
M00572	ERAS11_Day4opt	ERAS11	4	0	8	0
M00577	ERAS11_Day4opt	ERAS11	4	1	8	0.125
M00579	ERAS11_Day4opt	ERAS11	4	3	8	0.375
M00580	ERAS11_Day4opt	ERAS11	4	0	8	0
M00596	ERAS11_Day4opt	ERAS11	4	0	8	0
M00616	ERAS11_Day4opt	ERAS11	4	0	8	0
M00617	ERAS11_Day4opt	ERAS11	4	0	8	0
M00627	ERAS11_Day4opt	ERAS11	4	0	8	0
M00631	ERAS11_Day4opt	ERAS11	4	0	8	0
M00632	ERAS11_Day4opt	ERAS11	4	0	8	0
M00649	ERAS11_Day4opt	ERAS11	4	0	8	0
M00651	ERAS11_Day4opt	ERAS11	4	0	8	0
M00652	ERAS11_Day4opt	ERAS11	4	0	8	0
M00696	ERAS11_Day4opt	ERAS11	4	0	8	0
M00697	ERAS11_Day4opt	ERAS11	4	0	8	0
M00698	ERAS11_Day4opt	ERAS11	4	0	8	0
M00700	ERAS11_Day4opt	ERAS11	4	0	8	0
M00702	ERAS11_Day4opt	ERAS11	4	0	8	0
M00705	ERAS11_Day4opt	ERAS11	4	2	8	0.25
M00741	ERAS11_Day4opt	ERAS11	4	0	8	0
M00745	ERAS11_Day4opt	ERAS11	4	0	8	0
M00761	ERAS11_Day4opt	ERAS11	4	0	8	0
M00793	ERAS11_Day4opt	ERAS11	4	1	8	0.125
M00844	ERAS11_Day4opt	ERAS11	4	6	8	0.75
M00846	ERAS11_Day4opt	ERAS11	4	1	8	0.125
M00847	ERAS11_Day4opt	ERAS11	4	0	8	0
M00854	ERAS11_Day4opt	ERAS11	4	6	8	0.75
M00855	ERAS11_Day4opt	ERAS11	4	3	8	0.375
M00866	ERAS11_Day4opt	ERAS11	4	0	8	0
M00868	ERAS11_Day4opt	ERAS11	4	0	8	0
M00878	ERAS11_Day4opt	ERAS11	4	0	8	0
M00879	ERAS11_Day4opt	ERAS11	4	0	8	0
M00880	ERAS11_Day4opt	ERAS11	4	0	8	0
M00881	ERAS11_Day4opt	ERAS11	4	0	8	0
M00882	ERAS11_Day4opt	ERAS11	4	0	8	0
M00883	ERAS11_Day4opt	ERAS11	4	0	8	0
M00896	ERAS11_Day4opt	ERAS11	4	0	8	0
M00899	ERAS11_Day4opt	ERAS11	4	1	8	0.125
M00909	ERAS11_Day4opt	ERAS11	4	6	8	0.75
M00916	ERAS11_Day4opt	ERAS11	4	1	8	0.125
M00918	ERAS11_Day4opt	ERAS11	4	0	8	0
M00924	ERAS11_Day4opt	ERAS11	4	0	8	0
M00926	ERAS11_Day4opt	ERAS11	4	0	8	0
M00930	ERAS11_Day4opt	ERAS11	4	0	8	0
M00931	ERAS11_Day4opt	ERAS11	4	0	8	0
M00935	ERAS11_Day4opt	ERAS11	4	0	8	0
M00001	ERAS11_Day8	ERAS11	8	13	11	1.18182
M00002	ERAS11_Day8	ERAS11	8	13	11	1.18182
M00003	ERAS11_Day8	ERAS11	8	13	11	1.18182
M00004	ERAS11_Day8	ERAS11	8	3	11	0.272727
M00005	ERAS11_Day8	ERAS11	8	17	11	1.54545
M00006	ERAS11_Day8	ERAS11	8	3	11	0.272727
M00007	ERAS11_Day8	ERAS11	8	17	11	1.54545
M00008	ERAS11_Day8	ERAS11	8	3	11	0.272727
M00009	ERAS11_Day8	ERAS11	8	5	11	0.454545
M00010	ERAS11_Day8	ERAS11	8	5	11	0.454545
M00011	ERAS11_Day8	ERAS11	8	6	11	0.545455
M00012	ERAS11_Day8	ERAS11	8	2	11	0.181818
M00015	ERAS11_Day8	ERAS11	8	11	11	1
M00016	ERAS11_Day8	ERAS11	8	5	11	0.454545
M00017	ERAS11_Day8	ERAS11	8	8	11	0.727273
M00018	ERAS11_Day8	ERAS11	8	10	11	0.909091
M00019	ERAS11_Day8	ERAS11	8	11	11	1
M00020	ERAS11_Day8	ERAS11	8	10	11	0.909091
M00021	ERAS11_Day8	ERAS11	8	15	11	1.36364
M00022	ERAS11_Day8	ERAS11	8	10	11	0.909091
M00023	ERAS11_Day8	ERAS11	8	7	11	0.636364
M00024	ERAS11_Day8	ERAS11	8	4	11	0.363636
M00025	ERAS11_Day8	ERAS11	8	4	11	0.363636
M00026	ERAS11_Day8	ERAS11	8	9	11	0.818182
M00027	ERAS11_Day8	ERAS11	8	3	11	0.272727
M00028	ERAS11_Day8	ERAS11	8	10	11	0.909091
M00034	ERAS11_Day8	ERAS11	8	2	11	0.181818
M00035	ERAS11_Day8	ERAS11	8	2	11	0.181818
M00040	ERAS11_Day8	ERAS11	8	0	11	0
M00045	ERAS11_Day8	ERAS11	8	4	11	0.363636
M00046	ERAS11_Day8	ERAS11	8	1	11	0.0909091
M00048	ERAS11_Day8	ERAS11	8	12	11	1.09091
M00049	ERAS11_Day8	ERAS11	8	14	11	1.27273
M00050	ERAS11_Day8	ERAS11	8	12	11	1.09091
M00051	ERAS11_Day8	ERAS11	8	13	11	1.18182
M00052	ERAS11_Day8	ERAS11	8	8	11	0.727273
M00053	ERAS11_Day8	ERAS11	8	3	11	0.272727
M00060	ERAS11_Day8	ERAS11	8	3	11	0.272727
M00061	ERAS11_Day8	ERAS11	8	7	11	0.636364
M00063	ERAS11_Day8	ERAS11	8	9	11	0.818182
M00064	ERAS11_Day8	ERAS11	8	8	11	0.727273
M00082	ERAS11_Day8	ERAS11	8	7	11	0.636364
M00083	ERAS11_Day8	ERAS11	8	20	11	1.81818
M00086	ERAS11_Day8	ERAS11	8	11	11	1
M00087	ERAS11_Day8	ERAS11	8	6	11	0.545455
M00088	ERAS11_Day8	ERAS11	8	0	11	0
M00091	ERAS11_Day8	ERAS11	8	0	11	0
M00093	ERAS11_Day8	ERAS11	8	11	11	1
M00096	ERAS11_Day8	ERAS11	8	6	11	0.545455
M00098	ERAS11_Day8	ERAS11	8	2	11	0.181818
M00115	ERAS11_Day8	ERAS11	8	8	11	0.727273
M00116	ERAS11_Day8	ERAS11	8	4	11	0.363636
M00117	ERAS11_Day8	ERAS11	8	0	11	0
M00118	ERAS11_Day8	ERAS11	8	2	11	0.181818
M00119	ERAS11_Day8	ERAS11	8	4	11	0.363636
M00120	ERAS11_Day8	ERAS11	8	12	11	1.09091
M00121	ERAS11_Day8	ERAS11	8	7	11	0.636364
M00122	ERAS11_Day8	ERAS11	8	8	11	0.727273
M00123	ERAS11_Day8	ERAS11	8	5	11	0.454545
M00124	ERAS11_Day8	ERAS11	8	2	11	0.181818
M00125	ERAS11_Day8	ERAS11	8	9	11	0.818182
M00126	ERAS11_Day8	ERAS11	8	7	11	0.636364
M00127	ERAS11_Day8	ERAS11	8	3	11	0.272727
M00133	ERAS11_Day8	ERAS11	8	7	11	0.636364
M00134	ERAS11_Day8	ERAS11	8	0	11	0
M00136	ERAS11_Day8	ERAS11	8	1	11	0.0909091
M00140	ERAS11_Day8	ERAS11	8	11	11	1
M00142	ERAS11_Day8	ERAS11	8	0	11	0
M00144	ERAS11_Day8	ERAS11	8	6	11	0.545455
M00145	ERAS11_Day8	ERAS11	8	0	11	0
M00149	ERAS11_Day8	ERAS11	8	4	11	0.363636
M00150	ERAS11_Day8	ERAS11	8	3	11	0.272727
M00151	ERAS11_Day8	ERAS11	8	0	11	0
M00153	ERAS11_Day8	ERAS11	8	2	11	0.181818
M00157	ERAS11_Day8	ERAS11	8	11	11	1
M00159	ERAS11_Day8	ERAS11	8	3	11	0.272727
M00161	ERAS11_Day8	ERAS11	8	0	11	0
M00166	ERAS11_Day8	ERAS11	8	2	11	0.181818
M00168	ERAS11_Day8	ERAS11	8	2	11	0.181818
M00169	ERAS11_Day8	ERAS11	8	10	11	0.909091
M00175	ERAS11_Day8	ERAS11	8	1	11	0.0909091
M00176	ERAS11_Day8	ERAS11	8	2	11	0.181818
M00307	ERAS11_Day8	ERAS11	8	23	11	2.09091
M00308	ERAS11_Day8	ERAS11	8	0	11	0
M00338	ERAS11_Day8	ERAS11	8	0	11	0
M00345	ERAS11_Day8	ERAS11	8	2	11	0.181818
M00356	ERAS11_Day8	ERAS11	8	0	11	0
M00357	ERAS11_Day8	ERAS11	8	0	11	0
M00358	ERAS11_Day8	ERAS11	8	0	11	0
M00364	ERAS11_Day8	ERAS11	8	6	11	0.545455
M00365	ERAS11_Day8	ERAS11	8	1	11	0.0909091
M00417	ERAS11_Day8	ERAS11	8	1	11	0.0909091
M00432	ERAS11_Day8	ERAS11	8	13	11	1.18182
M00525	ERAS11_Day8	ERAS11	8	0	11	0
M00526	ERAS11_Day8	ERAS11	8	8	11	0.727273
M00527	ERAS11_Day8	ERAS11	8	6	11	0.545455
M00530	ERAS11_Day8	ERAS11	8	4	11	0.363636
M00533	ERAS11_Day8	ERAS11	8	2	11	0.181818
M00535	ERAS11_Day8	ERAS11	8	1	11	0.0909091
M00545	ERAS11_Day8	ERAS11	8	1	11	0.0909091
M00549	ERAS11_Day8	ERAS11	8	12	11	1.09091
M00550	ERAS11_Day8	ERAS11	8	4	11	0.363636
M00551	ERAS11_Day8	ERAS11	8	2	11	0.181818
M00552	ERAS11_Day8	ERAS11	8	3	11	0.272727
M00554	ERAS11_Day8	ERAS11	8	3	11	0.272727
M00555	ERAS11_Day8	ERAS11	8	2	11	0.181818
M00565	ERAS11_Day8	ERAS11	8	1	11	0.0909091
M00567	ERAS11_Day8	ERAS11	8	0	11	0
M00568	ERAS11_Day8	ERAS11	8	2	11	0.181818
M00570	ERAS11_Day8	ERAS11	8	11	11	1
M00572	ERAS11_Day8	ERAS11	8	2	11	0.181818
M00577	ERAS11_Day8	ERAS11	8	2	11	0.181818
M00579	ERAS11_Day8	ERAS11	8	13	11	1.18182
M00580	ERAS11_Day8	ERAS11	8	2	11	0.181818
M00596	ERAS11_Day8	ERAS11	8	0	11	0
M00616	ERAS11_Day8	ERAS11	8	2	11	0.181818
M00617	ERAS11_Day8	ERAS11	8	0	11	0
M00627	ERAS11_Day8	ERAS11	8	4	11	0.363636
M00631	ERAS11_Day8	ERAS11	8	6	11	0.545455
M00632	ERAS11_Day8	ERAS11	8	3	11	0.272727
M00649	ERAS11_Day8	ERAS11	8	0	11	0
M00651	ERAS11_Day8	ERAS11	8	1	11	0.0909091
M00652	ERAS11_Day8	ERAS11	8	0	11	0
M00696	ERAS11_Day8	ERAS11	8	2	11	0.181818
M00697	ERAS11_Day8	ERAS11	8	2	11	0.181818
M00698	ERAS11_Day8	ERAS11	8	0	11	0
M00700	ERAS11_Day8	ERAS11	8	0	11	0
M00702	ERAS11_Day8	ERAS11	8	2	11	0.181818
M00705	ERAS11_Day8	ERAS11	8	5	11	0.454545
M00741	ERAS11_Day8	ERAS11	8	2	11	0.181818
M00745	ERAS11_Day8	ERAS11	8	2	11	0.181818
M00761	ERAS11_Day8	ERAS11	8	2	11	0.181818
M00793	ERAS11_Day8	ERAS11	8	12	11	1.09091
M00844	ERAS11_Day8	ERAS11	8	12	11	1.09091
M00846	ERAS11_Day8	ERAS11	8	10	11	0.909091
M00847	ERAS11_Day8	ERAS11	8	1	11	0.0909091
M00854	ERAS11_Day8	ERAS11	8	12	11	1.09091
M00855	ERAS11_Day8	ERAS11	8	7	11	0.636364
M00866	ERAS11_Day8	ERAS11	8	2	11	0.181818
M00868	ERAS11_Day8	ERAS11	8	0	11	0
M00878	ERAS11_Day8	ERAS11	8	2	11	0.181818
M00879	ERAS11_Day8	ERAS11	8	3	11	0.272727
M00880	ERAS11_Day8	ERAS11	8	5	11	0.454545
M00881	ERAS11_Day8	ERAS11	8	5	11	0.454545
M00882	ERAS11_Day8	ERAS11	8	0	11	0
M00883	ERAS11_Day8	ERAS11	8	0	11	0
M00896	ERAS11_Day8	ERAS11	8	0	11	0
M00899	ERAS11_Day8	ERAS11	8	11	11	1
M00909	ERAS11_Day8	ERAS11	8	11	11	1
M00916	ERAS11_Day8	ERAS11	8	2	11	0.181818
M00918	ERAS11_Day8	ERAS11	8	1	11	0.0909091
M00924	ERAS11_Day8	ERAS11	8	8	11	0.727273
M00926	ERAS11_Day8	ERAS11	8	2	11	0.181818
M00930	ERAS11_Day8	ERAS11	8	1	11	0.0909091
M00931	ERAS11_Day8	ERAS11	8	0	11	0
M00935	ERAS11_Day8	ERAS11	8	0	11	0
M00001	ERAS12_Day0	ERAS12	0	21	27	0.777778
M00002	ERAS12_Day0	ERAS12	0	21	27	0.777778
M00003	ERAS12_Day0	ERAS12	0	21	27	0.777778
M00004	ERAS12_Day0	ERAS12	0	4	27	0.148148
M00005	ERAS12_Day0	ERAS12	0	30	27	1.11111
M00006	ERAS12_Day0	ERAS12	0	4	27	0.148148
M00007	ERAS12_Day0	ERAS12	0	13	27	0.481481
M00008	ERAS12_Day0	ERAS12	0	0	27	0
M00009	ERAS12_Day0	ERAS12	0	1	27	0.037037
M00010	ERAS12_Day0	ERAS12	0	1	27	0.037037
M00011	ERAS12_Day0	ERAS12	0	3	27	0.111111
M00012	ERAS12_Day0	ERAS12	0	0	27	0
M00015	ERAS12_Day0	ERAS12	0	24	27	0.888889
M00016	ERAS12_Day0	ERAS12	0	2	27	0.0740741
M00017	ERAS12_Day0	ERAS12	0	1	27	0.037037
M00018	ERAS12_Day0	ERAS12	0	16	27	0.592593
M00019	ERAS12_Day0	ERAS12	0	25	27	0.925926
M00020	ERAS12_Day0	ERAS12	0	16	27	0.592593
M00021	ERAS12_Day0	ERAS12	0	25	27	0.925926
M00022	ERAS12_Day0	ERAS12	0	30	27	1.11111
M00023	ERAS12_Day0	ERAS12	0	14	27	0.518519
M00024	ERAS12_Day0	ERAS12	0	0	27	0
M00025	ERAS12_Day0	ERAS12	0	0	27	0
M00026	ERAS12_Day0	ERAS12	0	18	27	0.666667
M00027	ERAS12_Day0	ERAS12	0	0	27	0
M00028	ERAS12_Day0	ERAS12	0	27	27	1
M00034	ERAS12_Day0	ERAS12	0	0	27	0
M00035	ERAS12_Day0	ERAS12	0	1	27	0.037037
M00040	ERAS12_Day0	ERAS12	0	0	27	0
M00045	ERAS12_Day0	ERAS12	0	5	27	0.185185
M00046	ERAS12_Day0	ERAS12	0	0	27	0
M00048	ERAS12_Day0	ERAS12	0	23	27	0.851852
M00049	ERAS12_Day0	ERAS12	0	30	27	1.11111
M00050	ERAS12_Day0	ERAS12	0	25	27	0.925926
M00051	ERAS12_Day0	ERAS12	0	31	27	1.14815
M00052	ERAS12_Day0	ERAS12	0	5	27	0.185185
M00053	ERAS12_Day0	ERAS12	0	4	27	0.148148
M00060	ERAS12_Day0	ERAS12	0	0	27	0
M00061	ERAS12_Day0	ERAS12	0	3	27	0.111111
M00063	ERAS12_Day0	ERAS12	0	7	27	0.259259
M00064	ERAS12_Day0	ERAS12	0	2	27	0.0740741
M00082	ERAS12_Day0	ERAS12	0	9	27	0.333333
M00083	ERAS12_Day0	ERAS12	0	34	27	1.25926
M00086	ERAS12_Day0	ERAS12	0	35	27	1.2963
M00087	ERAS12_Day0	ERAS12	0	0	27	0
M00088	ERAS12_Day0	ERAS12	0	0	27	0
M00091	ERAS12_Day0	ERAS12	0	6	27	0.222222
M00093	ERAS12_Day0	ERAS12	0	13	27	0.481481
M00096	ERAS12_Day0	ERAS12	0	10	27	0.37037
M00098	ERAS12_Day0	ERAS12	0	10	27	0.37037
M00115	ERAS12_Day0	ERAS12	0	20	27	0.740741
M00116	ERAS12_Day0	ERAS12	0	0	27	0
M00117	ERAS12_Day0	ERAS12	0	0	27	0
M00118	ERAS12_Day0	ERAS12	0	0	27	0
M00119	ERAS12_Day0	ERAS12	0	10	27	0.37037
M00120	ERAS12_Day0	ERAS12	0	22	27	0.814815
M00121	ERAS12_Day0	ERAS12	0	1	27	0.037037
M00122	ERAS12_Day0	ERAS12	0	17	27	0.62963
M00123	ERAS12_Day0	ERAS12	0	5	27	0.185185
M00124	ERAS12_Day0	ERAS12	0	0	27	0
M00125	ERAS12_Day0	ERAS12	0	17	27	0.62963
M00126	ERAS12_Day0	ERAS12	0	12	27	0.444444
M00127	ERAS12_Day0	ERAS12	0	9	27	0.333333
M00133	ERAS12_Day0	ERAS12	0	4	27	0.148148
M00134	ERAS12_Day0	ERAS12	0	0	27	0
M00136	ERAS12_Day0	ERAS12	0	0	27	0
M00140	ERAS12_Day0	ERAS12	0	26	27	0.962963
M00142	ERAS12_Day0	ERAS12	0	0	27	0
M00144	ERAS12_Day0	ERAS12	0	6	27	0.222222
M00145	ERAS12_Day0	ERAS12	0	0	27	0
M00149	ERAS12_Day0	ERAS12	0	0	27	0
M00150	ERAS12_Day0	ERAS12	0	1	27	0.037037
M00151	ERAS12_Day0	ERAS12	0	0	27	0
M00153	ERAS12_Day0	ERAS12	0	0	27	0
M00157	ERAS12_Day0	ERAS12	0	31	27	1.14815
M00159	ERAS12_Day0	ERAS12	0	5	27	0.185185
M00161	ERAS12_Day0	ERAS12	0	0	27	0
M00166	ERAS12_Day0	ERAS12	0	1	27	0.037037
M00168	ERAS12_Day0	ERAS12	0	5	27	0.185185
M00169	ERAS12_Day0	ERAS12	0	5	27	0.185185
M00175	ERAS12_Day0	ERAS12	0	0	27	0
M00176	ERAS12_Day0	ERAS12	0	1	27	0.037037
M00307	ERAS12_Day0	ERAS12	0	39	27	1.44444
M00308	ERAS12_Day0	ERAS12	0	0	27	0
M00338	ERAS12_Day0	ERAS12	0	0	27	0
M00345	ERAS12_Day0	ERAS12	0	0	27	0
M00356	ERAS12_Day0	ERAS12	0	0	27	0
M00357	ERAS12_Day0	ERAS12	0	0	27	0
M00358	ERAS12_Day0	ERAS12	0	0	27	0
M00364	ERAS12_Day0	ERAS12	0	8	27	0.296296
M00365	ERAS12_Day0	ERAS12	0	6	27	0.222222
M00417	ERAS12_Day0	ERAS12	0	1	27	0.037037
M00432	ERAS12_Day0	ERAS12	0	20	27	0.740741
M00525	ERAS12_Day0	ERAS12	0	0	27	0
M00526	ERAS12_Day0	ERAS12	0	9	27	0.333333
M00527	ERAS12_Day0	ERAS12	0	22	27	0.814815
M00530	ERAS12_Day0	ERAS12	0	1	27	0.037037
M00533	ERAS12_Day0	ERAS12	0	0	27	0
M00535	ERAS12_Day0	ERAS12	0	5	27	0.185185
M00545	ERAS12_Day0	ERAS12	0	0	27	0
M00549	ERAS12_Day0	ERAS12	0	11	27	0.407407
M00550	ERAS12_Day0	ERAS12	0	0	27	0
M00551	ERAS12_Day0	ERAS12	0	0	27	0
M00552	ERAS12_Day0	ERAS12	0	0	27	0
M00554	ERAS12_Day0	ERAS12	0	2	27	0.0740741
M00555	ERAS12_Day0	ERAS12	0	0	27	0
M00565	ERAS12_Day0	ERAS12	0	0	27	0
M00567	ERAS12_Day0	ERAS12	0	0	27	0
M00568	ERAS12_Day0	ERAS12	0	0	27	0
M00570	ERAS12_Day0	ERAS12	0	22	27	0.814815
M00572	ERAS12_Day0	ERAS12	0	2	27	0.0740741
M00577	ERAS12_Day0	ERAS12	0	1	27	0.037037
M00579	ERAS12_Day0	ERAS12	0	9	27	0.333333
M00580	ERAS12_Day0	ERAS12	0	0	27	0
M00596	ERAS12_Day0	ERAS12	0	0	27	0
M00616	ERAS12_Day0	ERAS12	0	1	27	0.037037
M00617	ERAS12_Day0	ERAS12	0	0	27	0
M00627	ERAS12_Day0	ERAS12	0	13	27	0.481481
M00631	ERAS12_Day0	ERAS12	0	10	27	0.37037
M00632	ERAS12_Day0	ERAS12	0	2	27	0.0740741
M00649	ERAS12_Day0	ERAS12	0	0	27	0
M00651	ERAS12_Day0	ERAS12	0	5	27	0.185185
M00652	ERAS12_Day0	ERAS12	0	1	27	0.037037
M00696	ERAS12_Day0	ERAS12	0	0	27	0
M00697	ERAS12_Day0	ERAS12	0	0	27	0
M00698	ERAS12_Day0	ERAS12	0	0	27	0
M00700	ERAS12_Day0	ERAS12	0	1	27	0.037037
M00702	ERAS12_Day0	ERAS12	0	0	27	0
M00705	ERAS12_Day0	ERAS12	0	9	27	0.333333
M00741	ERAS12_Day0	ERAS12	0	5	27	0.185185
M00745	ERAS12_Day0	ERAS12	0	0	27	0
M00761	ERAS12_Day0	ERAS12	0	0	27	0
M00793	ERAS12_Day0	ERAS12	0	20	27	0.740741
M00844	ERAS12_Day0	ERAS12	0	28	27	1.03704
M00846	ERAS12_Day0	ERAS12	0	8	27	0.296296
M00847	ERAS12_Day0	ERAS12	0	0	27	0
M00854	ERAS12_Day0	ERAS12	0	33	27	1.22222
M00855	ERAS12_Day0	ERAS12	0	24	27	0.888889
M00866	ERAS12_Day0	ERAS12	0	0	27	0
M00868	ERAS12_Day0	ERAS12	0	0	27	0
M00878	ERAS12_Day0	ERAS12	0	0	27	0
M00879	ERAS12_Day0	ERAS12	0	0	27	0
M00880	ERAS12_Day0	ERAS12	0	1	27	0.037037
M00881	ERAS12_Day0	ERAS12	0	3	27	0.111111
M00882	ERAS12_Day0	ERAS12	0	0	27	0
M00883	ERAS12_Day0	ERAS12	0	0	27	0
M00896	ERAS12_Day0	ERAS12	0	2	27	0.0740741
M00899	ERAS12_Day0	ERAS12	0	20	27	0.740741
M00909	ERAS12_Day0	ERAS12	0	12	27	0.444444
M00916	ERAS12_Day0	ERAS12	0	12	27	0.444444
M00918	ERAS12_Day0	ERAS12	0	0	27	0
M00924	ERAS12_Day0	ERAS12	0	8	27	0.296296
M00926	ERAS12_Day0	ERAS12	0	0	27	0
M00930	ERAS12_Day0	ERAS12	0	0	27	0
M00931	ERAS12_Day0	ERAS12	0	0	27	0
M00935	ERAS12_Day0	ERAS12	0	0	27	0
M00001	ERAS12_Day180	ERAS12	180	22	22	1
M00002	ERAS12_Day180	ERAS12	180	22	22	1
M00003	ERAS12_Day180	ERAS12	180	19	22	0.863636
M00004	ERAS12_Day180	ERAS12	180	8	22	0.363636
M00005	ERAS12_Day180	ERAS12	180	30	22	1.36364
M00006	ERAS12_Day180	ERAS12	180	8	22	0.363636
M00007	ERAS12_Day180	ERAS12	180	16	22	0.727273
M00008	ERAS12_Day180	ERAS12	180	1	22	0.0454545
M00009	ERAS12_Day180	ERAS12	180	0	22	0
M00010	ERAS12_Day180	ERAS12	180	0	22	0
M00011	ERAS12_Day180	ERAS12	180	6	22	0.272727
M00012	ERAS12_Day180	ERAS12	180	0	22	0
M00015	ERAS12_Day180	ERAS12	180	20	22	0.909091
M00016	ERAS12_Day180	ERAS12	180	3	22	0.136364
M00017	ERAS12_Day180	ERAS12	180	4	22	0.181818
M00018	ERAS12_Day180	ERAS12	180	11	22	0.5
M00019	ERAS12_Day180	ERAS12	180	22	22	1
M00020	ERAS12_Day180	ERAS12	180	21	22	0.954545
M00021	ERAS12_Day180	ERAS12	180	27	22	1.22727
M00022	ERAS12_Day180	ERAS12	180	23	22	1.04545
M00023	ERAS12_Day180	ERAS12	180	14	22	0.636364
M00024	ERAS12_Day180	ERAS12	180	0	22	0
M00025	ERAS12_Day180	ERAS12	180	0	22	0
M00026	ERAS12_Day180	ERAS12	180	14	22	0.636364
M00027	ERAS12_Day180	ERAS12	180	0	22	0
M00028	ERAS12_Day180	ERAS12	180	18	22	0.818182
M00034	ERAS12_Day180	ERAS12	180	0	22	0
M00035	ERAS12_Day180	ERAS12	180	0	22	0
M00040	ERAS12_Day180	ERAS12	180	0	22	0
M00045	ERAS12_Day180	ERAS12	180	10	22	0.454545
M00046	ERAS12_Day180	ERAS12	180	1	22	0.0454545
M00048	ERAS12_Day180	ERAS12	180	23	22	1.04545
M00049	ERAS12_Day180	ERAS12	180	24	22	1.09091
M00050	ERAS12_Day180	ERAS12	180	23	22	1.04545
M00051	ERAS12_Day180	ERAS12	180	23	22	1.04545
M00052	ERAS12_Day180	ERAS12	180	7	22	0.318182
M00053	ERAS12_Day180	ERAS12	180	1	22	0.0454545
M00060	ERAS12_Day180	ERAS12	180	0	22	0
M00061	ERAS12_Day180	ERAS12	180	5	22	0.227273
M00063	ERAS12_Day180	ERAS12	180	11	22	0.5
M00064	ERAS12_Day180	ERAS12	180	1	22	0.0454545
M00082	ERAS12_Day180	ERAS12	180	7	22	0.318182
M00083	ERAS12_Day180	ERAS12	180	29	22	1.31818
M00086	ERAS12_Day180	ERAS12	180	40	22	1.81818
M00087	ERAS12_Day180	ERAS12	180	1	22	0.0454545
M00088	ERAS12_Day180	ERAS12	180	0	22	0
M00091	ERAS12_Day180	ERAS12	180	4	22	0.181818
M00093	ERAS12_Day180	ERAS12	180	11	22	0.5
M00096	ERAS12_Day180	ERAS12	180	18	22	0.818182
M00098	ERAS12_Day180	ERAS12	180	6	22	0.272727
M00115	ERAS12_Day180	ERAS12	180	17	22	0.772727
M00116	ERAS12_Day180	ERAS12	180	0	22	0
M00117	ERAS12_Day180	ERAS12	180	0	22	0
M00118	ERAS12_Day180	ERAS12	180	0	22	0
M00119	ERAS12_Day180	ERAS12	180	12	22	0.545455
M00120	ERAS12_Day180	ERAS12	180	19	22	0.863636
M00121	ERAS12_Day180	ERAS12	180	1	22	0.0454545
M00122	ERAS12_Day180	ERAS12	180	13	22	0.590909
M00123	ERAS12_Day180	ERAS12	180	10	22	0.454545
M00124	ERAS12_Day180	ERAS12	180	0	22	0
M00125	ERAS12_Day180	ERAS12	180	17	22	0.772727
M00126	ERAS12_Day180	ERAS12	180	13	22	0.590909
M00127	ERAS12_Day180	ERAS12	180	11	22	0.5
M00133	ERAS12_Day180	ERAS12	180	2	22	0.0909091
M00134	ERAS12_Day180	ERAS12	180	0	22	0
M00136	ERAS12_Day180	ERAS12	180	0	22	0
M00140	ERAS12_Day180	ERAS12	180	24	22	1.09091
M00142	ERAS12_Day180	ERAS12	180	0	22	0
M00144	ERAS12_Day180	ERAS12	180	12	22	0.545455
M00145	ERAS12_Day180	ERAS12	180	0	22	0
M00149	ERAS12_Day180	ERAS12	180	0	22	0
M00150	ERAS12_Day180	ERAS12	180	0	22	0
M00151	ERAS12_Day180	ERAS12	180	0	22	0
M00153	ERAS12_Day180	ERAS12	180	0	22	0
M00157	ERAS12_Day180	ERAS12	180	27	22	1.22727
M00159	ERAS12_Day180	ERAS12	180	4	22	0.181818
M00161	ERAS12_Day180	ERAS12	180	0	22	0
M00166	ERAS12_Day180	ERAS12	180	0	22	0
M00168	ERAS12_Day180	ERAS12	180	1	22	0.0454545
M00169	ERAS12_Day180	ERAS12	180	9	22	0.409091
M00175	ERAS12_Day180	ERAS12	180	0	22	0
M00176	ERAS12_Day180	ERAS12	180	0	22	0
M00307	ERAS12_Day180	ERAS12	180	40	22	1.81818
M00308	ERAS12_Day180	ERAS12	180	0	22	0
M00338	ERAS12_Day180	ERAS12	180	0	22	0
M00345	ERAS12_Day180	ERAS12	180	0	22	0
M00356	ERAS12_Day180	ERAS12	180	0	22	0
M00357	ERAS12_Day180	ERAS12	180	0	22	0
M00358	ERAS12_Day180	ERAS12	180	0	22	0
M00364	ERAS12_Day180	ERAS12	180	7	22	0.318182
M00365	ERAS12_Day180	ERAS12	180	6	22	0.272727
M00417	ERAS12_Day180	ERAS12	180	0	22	0
M00432	ERAS12_Day180	ERAS12	180	19	22	0.863636
M00525	ERAS12_Day180	ERAS12	180	0	22	0
M00526	ERAS12_Day180	ERAS12	180	12	22	0.545455
M00527	ERAS12_Day180	ERAS12	180	22	22	1
M00530	ERAS12_Day180	ERAS12	180	0	22	0
M00533	ERAS12_Day180	ERAS12	180	0	22	0
M00535	ERAS12_Day180	ERAS12	180	6	22	0.272727
M00545	ERAS12_Day180	ERAS12	180	0	22	0
M00549	ERAS12_Day180	ERAS12	180	4	22	0.181818
M00550	ERAS12_Day180	ERAS12	180	0	22	0
M00551	ERAS12_Day180	ERAS12	180	0	22	0
M00552	ERAS12_Day180	ERAS12	180	0	22	0
M00554	ERAS12_Day180	ERAS12	180	1	22	0.0454545
M00555	ERAS12_Day180	ERAS12	180	0	22	0
M00565	ERAS12_Day180	ERAS12	180	0	22	0
M00567	ERAS12_Day180	ERAS12	180	0	22	0
M00568	ERAS12_Day180	ERAS12	180	0	22	0
M00570	ERAS12_Day180	ERAS12	180	18	22	0.818182
M00572	ERAS12_Day180	ERAS12	180	6	22	0.272727
M00577	ERAS12_Day180	ERAS12	180	1	22	0.0454545
M00579	ERAS12_Day180	ERAS12	180	6	22	0.272727
M00580	ERAS12_Day180	ERAS12	180	0	22	0
M00596	ERAS12_Day180	ERAS12	180	0	22	0
M00616	ERAS12_Day180	ERAS12	180	0	22	0
M00617	ERAS12_Day180	ERAS12	180	0	22	0
M00627	ERAS12_Day180	ERAS12	180	11	22	0.5
M00631	ERAS12_Day180	ERAS12	180	15	22	0.681818
M00632	ERAS12_Day180	ERAS12	180	1	22	0.0454545
M00649	ERAS12_Day180	ERAS12	180	0	22	0
M00651	ERAS12_Day180	ERAS12	180	7	22	0.318182
M00652	ERAS12_Day180	ERAS12	180	0	22	0
M00696	ERAS12_Day180	ERAS12	180	0	22	0
M00697	ERAS12_Day180	ERAS12	180	0	22	0
M00698	ERAS12_Day180	ERAS12	180	0	22	0
M00700	ERAS12_Day180	ERAS12	180	0	22	0
M00702	ERAS12_Day180	ERAS12	180	0	22	0
M00705	ERAS12_Day180	ERAS12	180	8	22	0.363636
M00741	ERAS12_Day180	ERAS12	180	8	22	0.363636
M00745	ERAS12_Day180	ERAS12	180	0	22	0
M00761	ERAS12_Day180	ERAS12	180	0	22	0
M00793	ERAS12_Day180	ERAS12	180	29	22	1.31818
M00844	ERAS12_Day180	ERAS12	180	19	22	0.863636
M00846	ERAS12_Day180	ERAS12	180	5	22	0.227273
M00847	ERAS12_Day180	ERAS12	180	0	22	0
M00854	ERAS12_Day180	ERAS12	180	32	22	1.45455
M00855	ERAS12_Day180	ERAS12	180	15	22	0.681818
M00866	ERAS12_Day180	ERAS12	180	0	22	0
M00868	ERAS12_Day180	ERAS12	180	0	22	0
M00878	ERAS12_Day180	ERAS12	180	0	22	0
M00879	ERAS12_Day180	ERAS12	180	0	22	0
M00880	ERAS12_Day180	ERAS12	180	0	22	0
M00881	ERAS12_Day180	ERAS12	180	9	22	0.409091
M00882	ERAS12_Day180	ERAS12	180	0	22	0
M00883	ERAS12_Day180	ERAS12	180	0	22	0
M00896	ERAS12_Day180	ERAS12	180	3	22	0.136364
M00899	ERAS12_Day180	ERAS12	180	14	22	0.636364
M00909	ERAS12_Day180	ERAS12	180	6	22	0.272727
M00916	ERAS12_Day180	ERAS12	180	5	22	0.227273
M00918	ERAS12_Day180	ERAS12	180	0	22	0
M00924	ERAS12_Day180	ERAS12	180	8	22	0.363636
M00926	ERAS12_Day180	ERAS12	180	0	22	0
M00930	ERAS12_Day180	ERAS12	180	1	22	0.0454545
M00931	ERAS12_Day180	ERAS12	180	0	22	0
M00935	ERAS12_Day180	ERAS12	180	0	22	0
M00001	ERAS12_Day42	ERAS12	42	31	36	0.861111
M00002	ERAS12_Day42	ERAS12	42	31	36	0.861111
M00003	ERAS12_Day42	ERAS12	42	24	36	0.666667
M00004	ERAS12_Day42	ERAS12	42	12	36	0.333333
M00005	ERAS12_Day42	ERAS12	42	42	36	1.16667
M00006	ERAS12_Day42	ERAS12	42	12	36	0.333333
M00007	ERAS12_Day42	ERAS12	42	20	36	0.555556
M00008	ERAS12_Day42	ERAS12	42	0	36	0
M00009	ERAS12_Day42	ERAS12	42	2	36	0.0555556
M00010	ERAS12_Day42	ERAS12	42	2	36	0.0555556
M00011	ERAS12_Day42	ERAS12	42	8	36	0.222222
M00012	ERAS12_Day42	ERAS12	42	0	36	0
M00015	ERAS12_Day42	ERAS12	42	29	36	0.805556
M00016	ERAS12_Day42	ERAS12	42	8	36	0.222222
M00017	ERAS12_Day42	ERAS12	42	2	36	0.0555556
M00018	ERAS12_Day42	ERAS12	42	25	36	0.694444
M00019	ERAS12_Day42	ERAS12	42	28	36	0.777778
M00020	ERAS12_Day42	ERAS12	42	29	36	0.805556
M00021	ERAS12_Day42	ERAS12	42	29	36	0.805556
M00022	ERAS12_Day42	ERAS12	42	34	36	0.944444
M00023	ERAS12_Day42	ERAS12	42	22	36	0.611111
M00024	ERAS12_Day42	ERAS12	42	0	36	0
M00025	ERAS12_Day42	ERAS12	42	0	36	0
M00026	ERAS12_Day42	ERAS12	42	22	36	0.611111
M00027	ERAS12_Day42	ERAS12	42	0	36	0
M00028	ERAS12_Day42	ERAS12	42	28	36	0.777778
M00034	ERAS12_Day42	ERAS12	42	0	36	0
M00035	ERAS12_Day42	ERAS12	42	3	36	0.0833333
M00040	ERAS12_Day42	ERAS12	42	0	36	0
M00045	ERAS12_Day42	ERAS12	42	10	36	0.277778
M00046	ERAS12_Day42	ERAS12	42	1	36	0.0277778
M00048	ERAS12_Day42	ERAS12	42	35	36	0.972222
M00049	ERAS12_Day42	ERAS12	42	38	36	1.05556
M00050	ERAS12_Day42	ERAS12	42	33	36	0.916667
M00051	ERAS12_Day42	ERAS12	42	37	36	1.02778
M00052	ERAS12_Day42	ERAS12	42	8	36	0.222222
M00053	ERAS12_Day42	ERAS12	42	7	36	0.194444
M00060	ERAS12_Day42	ERAS12	42	0	36	0
M00061	ERAS12_Day42	ERAS12	42	4	36	0.111111
M00063	ERAS12_Day42	ERAS12	42	14	36	0.388889
M00064	ERAS12_Day42	ERAS12	42	1	36	0.0277778
M00082	ERAS12_Day42	ERAS12	42	15	36	0.416667
M00083	ERAS12_Day42	ERAS12	42	41	36	1.13889
M00086	ERAS12_Day42	ERAS12	42	58	36	1.61111
M00087	ERAS12_Day42	ERAS12	42	0	36	0
M00088	ERAS12_Day42	ERAS12	42	0	36	0
M00091	ERAS12_Day42	ERAS12	42	4	36	0.111111
M00093	ERAS12_Day42	ERAS12	42	18	36	0.5
M00096	ERAS12_Day42	ERAS12	42	20	36	0.555556
M00098	ERAS12_Day42	ERAS12	42	2	36	0.0555556
M00115	ERAS12_Day42	ERAS12	42	24	36	0.666667
M00116	ERAS12_Day42	ERAS12	42	0	36	0
M00117	ERAS12_Day42	ERAS12	42	0	36	0
M00118	ERAS12_Day42	ERAS12	42	0	36	0
M00119	ERAS12_Day42	ERAS12	42	15	36	0.416667
M00120	ERAS12_Day42	ERAS12	42	29	36	0.805556
M00121	ERAS12_Day42	ERAS12	42	1	36	0.0277778
M00122	ERAS12_Day42	ERAS12	42	17	36	0.472222
M00123	ERAS12_Day42	ERAS12	42	10	36	0.277778
M00124	ERAS12_Day42	ERAS12	42	0	36	0
M00125	ERAS12_Day42	ERAS12	42	20	36	0.555556
M00126	ERAS12_Day42	ERAS12	42	21	36	0.583333
M00127	ERAS12_Day42	ERAS12	42	15	36	0.416667
M00133	ERAS12_Day42	ERAS12	42	3	36	0.0833333
M00134	ERAS12_Day42	ERAS12	42	0	36	0
M00136	ERAS12_Day42	ERAS12	42	0	36	0
M00140	ERAS12_Day42	ERAS12	42	31	36	0.861111
M00142	ERAS12_Day42	ERAS12	42	0	36	0
M00144	ERAS12_Day42	ERAS12	42	14	36	0.388889
M00145	ERAS12_Day42	ERAS12	42	0	36	0
M00149	ERAS12_Day42	ERAS12	42	0	36	0
M00150	ERAS12_Day42	ERAS12	42	0	36	0
M00151	ERAS12_Day42	ERAS12	42	0	36	0
M00153	ERAS12_Day42	ERAS12	42	0	36	0
M00157	ERAS12_Day42	ERAS12	42	30	36	0.833333
M00159	ERAS12_Day42	ERAS12	42	4	36	0.111111
M00161	ERAS12_Day42	ERAS12	42	0	36	0
M00166	ERAS12_Day42	ERAS12	42	0	36	0
M00168	ERAS12_Day42	ERAS12	42	7	36	0.194444
M00169	ERAS12_Day42	ERAS12	42	10	36	0.277778
M00175	ERAS12_Day42	ERAS12	42	0	36	0
M00176	ERAS12_Day42	ERAS12	42	0	36	0
M00307	ERAS12_Day42	ERAS12	42	44	36	1.22222
M00308	ERAS12_Day42	ERAS12	42	0	36	0
M00338	ERAS12_Day42	ERAS12	42	0	36	0
M00345	ERAS12_Day42	ERAS12	42	0	36	0
M00356	ERAS12_Day42	ERAS12	42	0	36	0
M00357	ERAS12_Day42	ERAS12	42	0	36	0
M00358	ERAS12_Day42	ERAS12	42	0	36	0
M00364	ERAS12_Day42	ERAS12	42	14	36	0.388889
M00365	ERAS12_Day42	ERAS12	42	10	36	0.277778
M00417	ERAS12_Day42	ERAS12	42	0	36	0
M00432	ERAS12_Day42	ERAS12	42	24	36	0.666667
M00525	ERAS12_Day42	ERAS12	42	0	36	0
M00526	ERAS12_Day42	ERAS12	42	17	36	0.472222
M00527	ERAS12_Day42	ERAS12	42	29	36	0.805556
M00530	ERAS12_Day42	ERAS12	42	1	36	0.0277778
M00533	ERAS12_Day42	ERAS12	42	0	36	0
M00535	ERAS12_Day42	ERAS12	42	8	36	0.222222
M00545	ERAS12_Day42	ERAS12	42	0	36	0
M00549	ERAS12_Day42	ERAS12	42	11	36	0.305556
M00550	ERAS12_Day42	ERAS12	42	0	36	0
M00551	ERAS12_Day42	ERAS12	42	0	36	0
M00552	ERAS12_Day42	ERAS12	42	0	36	0
M00554	ERAS12_Day42	ERAS12	42	1	36	0.0277778
M00555	ERAS12_Day42	ERAS12	42	0	36	0
M00565	ERAS12_Day42	ERAS12	42	0	36	0
M00567	ERAS12_Day42	ERAS12	42	0	36	0
M00568	ERAS12_Day42	ERAS12	42	0	36	0
M00570	ERAS12_Day42	ERAS12	42	20	36	0.555556
M00572	ERAS12_Day42	ERAS12	42	8	36	0.222222
M00577	ERAS12_Day42	ERAS12	42	1	36	0.0277778
M00579	ERAS12_Day42	ERAS12	42	14	36	0.388889
M00580	ERAS12_Day42	ERAS12	42	0	36	0
M00596	ERAS12_Day42	ERAS12	42	0	36	0
M00616	ERAS12_Day42	ERAS12	42	0	36	0
M00617	ERAS12_Day42	ERAS12	42	0	36	0
M00627	ERAS12_Day42	ERAS12	42	20	36	0.555556
M00631	ERAS12_Day42	ERAS12	42	16	36	0.444444
M00632	ERAS12_Day42	ERAS12	42	1	36	0.0277778
M00649	ERAS12_Day42	ERAS12	42	0	36	0
M00651	ERAS12_Day42	ERAS12	42	10	36	0.277778
M00652	ERAS12_Day42	ERAS12	42	1	36	0.0277778
M00696	ERAS12_Day42	ERAS12	42	0	36	0
M00697	ERAS12_Day42	ERAS12	42	0	36	0
M00698	ERAS12_Day42	ERAS12	42	0	36	0
M00700	ERAS12_Day42	ERAS12	42	0	36	0
M00702	ERAS12_Day42	ERAS12	42	0	36	0
M00705	ERAS12_Day42	ERAS12	42	11	36	0.305556
M00741	ERAS12_Day42	ERAS12	42	13	36	0.361111
M00745	ERAS12_Day42	ERAS12	42	0	36	0
M00761	ERAS12_Day42	ERAS12	42	0	36	0
M00793	ERAS12_Day42	ERAS12	42	35	36	0.972222
M00844	ERAS12_Day42	ERAS12	42	26	36	0.722222
M00846	ERAS12_Day42	ERAS12	42	8	36	0.222222
M00847	ERAS12_Day42	ERAS12	42	0	36	0
M00854	ERAS12_Day42	ERAS12	42	43	36	1.19444
M00855	ERAS12_Day42	ERAS12	42	21	36	0.583333
M00866	ERAS12_Day42	ERAS12	42	0	36	0
M00868	ERAS12_Day42	ERAS12	42	0	36	0
M00878	ERAS12_Day42	ERAS12	42	0	36	0
M00879	ERAS12_Day42	ERAS12	42	0	36	0
M00880	ERAS12_Day42	ERAS12	42	1	36	0.0277778
M00881	ERAS12_Day42	ERAS12	42	9	36	0.25
M00882	ERAS12_Day42	ERAS12	42	0	36	0
M00883	ERAS12_Day42	ERAS12	42	0	36	0
M00896	ERAS12_Day42	ERAS12	42	4	36	0.111111
M00899	ERAS12_Day42	ERAS12	42	22	36	0.611111
M00909	ERAS12_Day42	ERAS12	42	16	36	0.444444
M00916	ERAS12_Day42	ERAS12	42	12	36	0.333333
M00918	ERAS12_Day42	ERAS12	42	0	36	0
M00924	ERAS12_Day42	ERAS12	42	10	36	0.277778
M00926	ERAS12_Day42	ERAS12	42	0	36	0
M00930	ERAS12_Day42	ERAS12	42	1	36	0.0277778
M00931	ERAS12_Day42	ERAS12	42	0	36	0
M00935	ERAS12_Day42	ERAS12	42	0	36	0
M00001	ERAS12_Day4opt	ERAS12	4	4	6	0.666667
M00002	ERAS12_Day4opt	ERAS12	4	4	6	0.666667
M00003	ERAS12_Day4opt	ERAS12	4	4	6	0.666667
M00004	ERAS12_Day4opt	ERAS12	4	2	6	0.333333
M00005	ERAS12_Day4opt	ERAS12	4	6	6	1
M00006	ERAS12_Day4opt	ERAS12	4	2	6	0.333333
M00007	ERAS12_Day4opt	ERAS12	4	7	6	1.16667
M00008	ERAS12_Day4opt	ERAS12	4	2	6	0.333333
M00009	ERAS12_Day4opt	ERAS12	4	2	6	0.333333
M00010	ERAS12_Day4opt	ERAS12	4	3	6	0.5
M00011	ERAS12_Day4opt	ERAS12	4	2	6	0.333333
M00012	ERAS12_Day4opt	ERAS12	4	0	6	0
M00015	ERAS12_Day4opt	ERAS12	4	3	6	0.5
M00016	ERAS12_Day4opt	ERAS12	4	2	6	0.333333
M00017	ERAS12_Day4opt	ERAS12	4	4	6	0.666667
M00018	ERAS12_Day4opt	ERAS12	4	4	6	0.666667
M00019	ERAS12_Day4opt	ERAS12	4	5	6	0.833333
M00020	ERAS12_Day4opt	ERAS12	4	3	6	0.5
M00021	ERAS12_Day4opt	ERAS12	4	6	6	1
M00022	ERAS12_Day4opt	ERAS12	4	6	6	1
M00023	ERAS12_Day4opt	ERAS12	4	4	6	0.666667
M00024	ERAS12_Day4opt	ERAS12	4	2	6	0.333333
M00025	ERAS12_Day4opt	ERAS12	4	2	6	0.333333
M00026	ERAS12_Day4opt	ERAS12	4	3	6	0.5
M00027	ERAS12_Day4opt	ERAS12	4	0	6	0
M00028	ERAS12_Day4opt	ERAS12	4	4	6	0.666667
M00034	ERAS12_Day4opt	ERAS12	4	1	6	0.166667
M00035	ERAS12_Day4opt	ERAS12	4	1	6	0.166667
M00040	ERAS12_Day4opt	ERAS12	4	0	6	0
M00045	ERAS12_Day4opt	ERAS12	4	1	6	0.166667
M00046	ERAS12_Day4opt	ERAS12	4	1	6	0.166667
M00048	ERAS12_Day4opt	ERAS12	4	6	6	1
M00049	ERAS12_Day4opt	ERAS12	4	7	6	1.16667
M00050	ERAS12_Day4opt	ERAS12	4	5	6	0.833333
M00051	ERAS12_Day4opt	ERAS12	4	5	6	0.833333
M00052	ERAS12_Day4opt	ERAS12	4	2	6	0.333333
M00053	ERAS12_Day4opt	ERAS12	4	2	6	0.333333
M00060	ERAS12_Day4opt	ERAS12	4	2	6	0.333333
M00061	ERAS12_Day4opt	ERAS12	4	5	6	0.833333
M00063	ERAS12_Day4opt	ERAS12	4	3	6	0.5
M00064	ERAS12_Day4opt	ERAS12	4	3	6	0.5
M00082	ERAS12_Day4opt	ERAS12	4	2	6	0.333333
M00083	ERAS12_Day4opt	ERAS12	4	5	6	0.833333
M00086	ERAS12_Day4opt	ERAS12	4	1	6	0.166667
M00087	ERAS12_Day4opt	ERAS12	4	2	6	0.333333
M00088	ERAS12_Day4opt	ERAS12	4	0	6	0
M00091	ERAS12_Day4opt	ERAS12	4	1	6	0.166667
M00093	ERAS12_Day4opt	ERAS12	4	4	6	0.666667
M00096	ERAS12_Day4opt	ERAS12	4	4	6	0.666667
M00098	ERAS12_Day4opt	ERAS12	4	0	6	0
M00115	ERAS12_Day4opt	ERAS12	4	2	6	0.333333
M00116	ERAS12_Day4opt	ERAS12	4	2	6	0.333333
M00117	ERAS12_Day4opt	ERAS12	4	1	6	0.166667
M00118	ERAS12_Day4opt	ERAS12	4	2	6	0.333333
M00119	ERAS12_Day4opt	ERAS12	4	2	6	0.333333
M00120	ERAS12_Day4opt	ERAS12	4	5	6	0.833333
M00121	ERAS12_Day4opt	ERAS12	4	2	6	0.333333
M00122	ERAS12_Day4opt	ERAS12	4	2	6	0.333333
M00123	ERAS12_Day4opt	ERAS12	4	3	6	0.5
M00124	ERAS12_Day4opt	ERAS12	4	1	6	0.166667
M00125	ERAS12_Day4opt	ERAS12	4	2	6	0.333333
M00126	ERAS12_Day4opt	ERAS12	4	3	6	0.5
M00127	ERAS12_Day4opt	ERAS12	4	2	6	0.333333
M00133	ERAS12_Day4opt	ERAS12	4	5	6	0.833333
M00134	ERAS12_Day4opt	ERAS12	4	0	6	0
M00136	ERAS12_Day4opt	ERAS12	4	1	6	0.166667
M00140	ERAS12_Day4opt	ERAS12	4	5	6	0.833333
M00142	ERAS12_Day4opt	ERAS12	4	0	6	0
M00144	ERAS12_Day4opt	ERAS12	4	2	6	0.333333
M00145	ERAS12_Day4opt	ERAS12	4	0	6	0
M00149	ERAS12_Day4opt	ERAS12	4	2	6	0.333333
M00150	ERAS12_Day4opt	ERAS12	4	2	6	0.333333
M00151	ERAS12_Day4opt	ERAS12	4	0	6	0
M00153	ERAS12_Day4opt	ERAS12	4	2	6	0.333333
M00157	ERAS12_Day4opt	ERAS12	4	4	6	0.666667
M00159	ERAS12_Day4opt	ERAS12	4	0	6	0
M00161	ERAS12_Day4opt	ERAS12	4	0	6	0
M00166	ERAS12_Day4opt	ERAS12	4	1	6	0.166667
M00168	ERAS12_Day4opt	ERAS12	4	0	6	0
M00169	ERAS12_Day4opt	ERAS12	4	3	6	0.5
M00175	ERAS12_Day4opt	ERAS12	4	0	6	0
M00176	ERAS12_Day4opt	ERAS12	4	1	6	0.166667
M00307	ERAS12_Day4opt	ERAS12	4	7	6	1.16667
M00308	ERAS12_Day4opt	ERAS12	4	0	6	0
M00338	ERAS12_Day4opt	ERAS12	4	0	6	0
M00345	ERAS12_Day4opt	ERAS12	4	0	6	0
M00356	ERAS12_Day4opt	ERAS12	4	0	6	0
M00357	ERAS12_Day4opt	ERAS12	4	0	6	0
M00358	ERAS12_Day4opt	ERAS12	4	0	6	0
M00364	ERAS12_Day4opt	ERAS12	4	3	6	0.5
M00365	ERAS12_Day4opt	ERAS12	4	0	6	0
M00417	ERAS12_Day4opt	ERAS12	4	1	6	0.166667
M00432	ERAS12_Day4opt	ERAS12	4	4	6	0.666667
M00525	ERAS12_Day4opt	ERAS12	4	0	6	0
M00526	ERAS12_Day4opt	ERAS12	4	2	6	0.333333
M00527	ERAS12_Day4opt	ERAS12	4	4	6	0.666667
M00530	ERAS12_Day4opt	ERAS12	4	3	6	0.5
M00533	ERAS12_Day4opt	ERAS12	4	1	6	0.166667
M00535	ERAS12_Day4opt	ERAS12	4	0	6	0
M00545	ERAS12_Day4opt	ERAS12	4	1	6	0.166667
M00549	ERAS12_Day4opt	ERAS12	4	2	6	0.333333
M00550	ERAS12_Day4opt	ERAS12	4	2	6	0.333333
M00551	ERAS12_Day4opt	ERAS12	4	1	6	0.166667
M00552	ERAS12_Day4opt	ERAS12	4	2	6	0.333333
M00554	ERAS12_Day4opt	ERAS12	4	1	6	0.166667
M00555	ERAS12_Day4opt	ERAS12	4	1	6	0.166667
M00565	ERAS12_Day4opt	ERAS12	4	0	6	0
M00567	ERAS12_Day4opt	ERAS12	4	0	6	0
M00568	ERAS12_Day4opt	ERAS12	4	1	6	0.166667
M00570	ERAS12_Day4opt	ERAS12	4	5	6	0.833333
M00572	ERAS12_Day4opt	ERAS12	4	2	6	0.333333
M00577	ERAS12_Day4opt	ERAS12	4	1	6	0.166667
M00579	ERAS12_Day4opt	ERAS12	4	5	6	0.833333
M00580	ERAS12_Day4opt	ERAS12	4	0	6	0
M00596	ERAS12_Day4opt	ERAS12	4	0	6	0
M00616	ERAS12_Day4opt	ERAS12	4	1	6	0.166667
M00617	ERAS12_Day4opt	ERAS12	4	0	6	0
M00627	ERAS12_Day4opt	ERAS12	4	0	6	0
M00631	ERAS12_Day4opt	ERAS12	4	3	6	0.5
M00632	ERAS12_Day4opt	ERAS12	4	1	6	0.166667
M00649	ERAS12_Day4opt	ERAS12	4	0	6	0
M00651	ERAS12_Day4opt	ERAS12	4	1	6	0.166667
M00652	ERAS12_Day4opt	ERAS12	4	0	6	0
M00696	ERAS12_Day4opt	ERAS12	4	1	6	0.166667
M00697	ERAS12_Day4opt	ERAS12	4	1	6	0.166667
M00698	ERAS12_Day4opt	ERAS12	4	0	6	0
M00700	ERAS12_Day4opt	ERAS12	4	0	6	0
[truncated: 6,893 more rows]
