# Supplementary material for: Microbes with higher metabolic independence are enriched in human gut microbiomes under stress
Source: eLife journal article supplement (doi:10.7554/elife.89862), 2023-09-08
Supplement: supp3 [file elife-89862-supp3-v1.zip]

## Sheet: a) Genome taxonomy, HMI class
genome	domain	phylum	class	order	family	genus	species	HMI score	classification	genome size (bp)	number of genes
GCA_000210075_1	Bacteria	Bacteroidota	Bacteroidia	Bacteroidales	Bacteroidaceae	Bacteroides	Bacteroides xylanisolvens	24.17	non-HMI	5976145	4731
GCA_000210555_1	Bacteria	Firmicutes_A	Clostridia	Lachnospirales	Lachnospiraceae	Coprococcus_A	Coprococcus_A catus	25.71	non-HMI	3522704	3277
GCA_000431575_1	Bacteria	Firmicutes_A	Clostridia	Oscillospirales	Oscillospiraceae	CAG-83	CAG-83 sp000431575	15.53	non-HMI	1866939	1857
GCA_000431795_1	Bacteria	Firmicutes	Bacilli	RF39	CAG-302	CAG-302	CAG-302 sp000431795	5.03	non-HMI	1241287	1294
GCA_000432135_1	Bacteria	Firmicutes_A	Clostridia	Oscillospirales	Oscillospiraceae	CAG-170	CAG-170 sp000432135	18.54	non-HMI	2538905	2525
GCA_000432375_1	Bacteria	Firmicutes_A	Clostridia	Oscillospirales	Oscillospiraceae	CAG-103	CAG-103 sp000432375	16.19	non-HMI	1878902	1944
GCA_000432435_1	Bacteria	Firmicutes_A	Clostridia	Oscillospirales	Acutalibacteraceae	CAG-180	CAG-180 sp000432435	21.16	non-HMI	1882175	1760
GCA_000432735_1	Bacteria	Bacteroidota	Bacteroidia	Bacteroidales	Bacteroidaceae	Phocaeicola	Phocaeicola sp000432735	23.41	non-HMI	3395230	2787
GCA_000433035_1	Bacteria	Firmicutes	Bacilli	ML615J-28	CAG-313	CAG-313	CAG-313 sp000433035	10.66	non-HMI	1674156	1511
GCA_000433635_1	Bacteria	Firmicutes_A	Clostridia	Oscillospirales	Ruminococcaceae	Ruminococcus_C	Ruminococcus_C sp000433635	26.14	non-HMI	2245400	2107
GCA_000434235_1	Bacteria	Bacteroidota	Bacteroidia	Bacteroidales	Rikenellaceae	Alistipes	Alistipes sp000434235	17.64	non-HMI	2678396	2260
GCA_000434275_1	Bacteria	Firmicutes_A	Clostridia	Lachnospirales	Lachnospiraceae	Agathobacter	Agathobacter sp000434275	25.6	non-HMI	2613178	2593
GCA_000434635_1	Bacteria	Firmicutes_A	Clostridia	Oscillospirales	Oscillospiraceae	CAG-110	CAG-110 sp000434635	18.23	non-HMI	2502913	2490
GCA_000434995_1	Bacteria	Firmicutes_A	Clostridia	Oscillospirales	Acutalibacteraceae	Eubacterium_R	Eubacterium_R sp000434995	22.69	non-HMI	1737170	1637
GCA_000435055_1	Bacteria	Firmicutes_A	Clostridia_A	Christensenellales	CAG-138	PeH17	PeH17 sp000435055	11.78	non-HMI	1979254	1807
GCA_000435175_1	Bacteria	Firmicutes_A	Clostridia	TANB77	CAG-508	CAG-245	CAG-245 sp000435175	6.33	non-HMI	1456949	1403
GCA_000435195_1	Bacteria	Firmicutes_A	Clostridia	Oscillospirales	Ruminococcaceae	Negativibacillus	Negativibacillus sp000435195	16.97	non-HMI	2048670	2130
GCA_000435555_1	Bacteria	Firmicutes_A	Clostridia	Oscillospirales	Oscillospiraceae	CAG-83	CAG-83 sp000435555	14.57	non-HMI	1591401	1642
GCA_000435655_1	Bacteria	Firmicutes_A	Clostridia	Lachnospirales	Lachnospiraceae	Clostridium_Q	Clostridium_Q sp000435655	25.01	non-HMI	2725104	2647
GCA_000435795_1	Bacteria	Firmicutes_A	Clostridia	Lachnospirales	Lachnospiraceae	CAG-81	CAG-81 sp000435795	22.23	non-HMI	2855675	2856
GCA_000435975_1	Bacteria	Firmicutes_A	Clostridia	Oscillospirales	Oscillospiraceae	CAG-83	CAG-83 sp000435975	12.69	non-HMI	1970478	1922
GCA_000436335_1	Bacteria	Firmicutes_A	Clostridia	Oscillospirales	Acutalibacteraceae	CAG-217	CAG-217 sp000436335	21.39	non-HMI	1896936	1820
GCA_000436475_1	Bacteria	Firmicutes_A	Clostridia	Lachnospirales	Lachnospiraceae	Lachnospira	Lachnospira sp000436475	25.08	non-HMI	2618909	2279
GCA_000436535_1	Bacteria	Firmicutes_A	Clostridia	Lachnospirales	Lachnospiraceae	Lachnospira	Lachnospira sp000436535	24.41	non-HMI	2833000	2472
GCA_000436755_1	Bacteria	Firmicutes_A	Clostridia	Lachnospirales	Lachnospiraceae	TF01-11	TF01-11 sp000436755	25.43	non-HMI	2889072	2666
GCA_000436835_1	Bacteria	Firmicutes_A	Clostridia	Oscillospirales	Acutalibacteraceae	Eubacterium_R	Eubacterium_R sp000436835	22.69	non-HMI	1873859	1760
GCA_000436875_1	Bacteria	Firmicutes_A	Clostridia	Oscillospirales	Oscillospiraceae	Oscillibacter	Oscillibacter sp000436875	22.15	non-HMI	2277379	2323
GCA_000437595_1	Bacteria	Firmicutes_A	Clostridia_A	Christensenellales	CAG-74	UBA11524	UBA11524 sp000437595	19.94	non-HMI	2915957	2577
GCA_000437735_1	Bacteria	Firmicutes_A	Clostridia	Lachnospirales	Lachnospiraceae	Lachnospira	Lachnospira sp000437735	27.87	HMI	2729955	2504
GCA_000437915_1	Bacteria	Firmicutes_A	Clostridia_A	Christensenellales	CAG-314	CAG-314	CAG-314 sp000437915	11.47	non-HMI	1508874	1345
GCA_000438155_1	Bacteria	Firmicutes_A	Clostridia	Lachnospirales	Lachnospiraceae	CAG-95	CAG-95 sp000438155	20.93	non-HMI	3089321	2940
GCA_000438255_1	Bacteria	Firmicutes_A	Clostridia	TANB77	CAG-508	CAG-269	CAG-269 sp000438255	7.72	non-HMI	1465258	1479
GCA_000438355_1	Bacteria	Firmicutes_A	Clostridia	TANB77	CAG-508	CAG-273	CAG-273 sp000438355	8.01	non-HMI	1340338	1291
GCA_000980495_1	Bacteria	Proteobacteria	Gammaproteobacteria	Burkholderiales	Burkholderiaceae	Parasutterella	Parasutterella sp000980495	22.88	non-HMI	2171676	2125
GCA_000980705_1	Bacteria	Firmicutes_A	Clostridia	Oscillospirales	Ruminococcaceae	Ruminococcus_C	Ruminococcus_C sp000980705	24.04	non-HMI	2956608	2757
GCA_001916065_1	Bacteria	Firmicutes_A	Clostridia	TANB77	CAG-508	CAG-269	CAG-269 sp001916065	8.09	non-HMI	1534126	1446
GCA_001916775_1	Bacteria	Firmicutes	Bacilli	RF39	CAG-302	CAG-302	CAG-302 sp001916775	4.19	non-HMI	1320564	1371
GCA_001916835_1	Bacteria	Firmicutes_A	Clostridia	Oscillospirales	Oscillospiraceae	Oscillibacter	Oscillibacter sp001916835	13.58	non-HMI	1464929	1440
GCA_001916855_1	Bacteria	Firmicutes_A	Clostridia	Oscillospirales	Oscillospiraceae	CAG-83	CAG-83 sp001916855	9.9	non-HMI	1704373	1659
GCA_001916965_1	Bacteria	Firmicutes_A	Clostridia	Lachnospirales	Lachnospiraceae	COE1	COE1 sp001916965	24.98	non-HMI	3453436	3159
GCA_001917125_1	Bacteria	Proteobacteria	Alphaproteobacteria	RF32	CAG-239	CAG-495	CAG-495 sp001917125	11.32	non-HMI	1836284	1851
GCA_002160535_1	Bacteria	Firmicutes_A	Clostridia	Lachnospirales	Lachnospiraceae	Clostridium_Q	Clostridium_Q saccharolyticum_A	24.49	non-HMI	3491619	3173
GCA_002404795_1	Bacteria	Firmicutes_A	Clostridia	Oscillospirales	Oscillospiraceae	CAG-170	CAG-170 sp002404795	15.43	non-HMI	2199938	2172
GCA_002437735_1	Bacteria	Firmicutes_A	Clostridia	Oscillospirales	Oscillospiraceae	ER4	ER4 sp002437735	10.12	non-HMI	1425502	1482
GCA_002438685_1	Bacteria	Firmicutes_A	Clostridia	Oscillospirales	Acutalibacteraceae	CAG-177	CAG-177 sp002438685	18.09	non-HMI	2000667	1969
GCA_002451755_1	Bacteria	Firmicutes_A	Clostridia	Oscillospirales	Acutalibacteraceae	CAG-177	CAG-177 sp002451755	18.08	non-HMI	2018271	1951
GCA_003149955_1	Bacteria	Firmicutes_A	Clostridia	Oscillospirales	Ruminococcaceae	Ruthenibacterium	Ruthenibacterium sp003149955	13.17	non-HMI	1954112	1902
GCA_003293635_1	Bacteria	Firmicutes_A	Clostridia	Oscillospirales	Ruminococcaceae	Faecalibacterium	Faecalibacterium prausnitzii_G	25.3	non-HMI	2833887	2616
GCA_003343965_1	Bacteria	Firmicutes_A	Clostridia	Peptostreptococcales	Anaerovoracaceae	QAKD01	QAKD01 sp003343965	18.29	non-HMI	1830559	1736
GCA_003449675_1	Bacteria	Firmicutes_A	Clostridia	Oscillospirales	Ruminococcaceae	Faecalibacterium	Faecalibacterium sp003449675	19.85	non-HMI	1826069	1740
GCA_003486385_1	Bacteria	Firmicutes_A	Clostridia	Lachnospirales	Lachnospiraceae	CAG-882	CAG-882 sp003486385	24.8	non-HMI	3083272	2729
GCA_003487665_1	Bacteria	Firmicutes_A	Clostridia	Oscillospirales	Oscillospiraceae	CAG-83	CAG-83 sp003487665	12.53	non-HMI	1915687	1893
GCA_003507655_1	Bacteria	Firmicutes_A	Clostridia	Lachnospirales	Lachnospiraceae	UBA11774	UBA11774 sp003507655	21.81	non-HMI	2214646	2104
GCA_003512525_1	Bacteria	Firmicutes_A	Clostridia	Oscillospirales	Ruminococcaceae	Ruminiclostridium_E	Ruminiclostridium_E sp003512525	23.68	non-HMI	2459777	2130
GCA_003514385_1	Bacteria	Firmicutes_A	Clostridia	Oscillospirales	Acutalibacteraceae	CAG-177	CAG-177 sp003514385	19.03	non-HMI	2073887	1918
GCA_003516765_1	Bacteria	Firmicutes_A	Clostridia	Oscillospirales	Oscillospiraceae	CAG-170	CAG-170 sp003516765	13.18	non-HMI	2020291	2026
GCA_003521145_1	Bacteria	Firmicutes	Bacilli	Lactobacillales	Streptococcaceae	Streptococcus	Streptococcus sp003521145	22.94	non-HMI	1677584	1814
GCA_003522105_1	Bacteria	Firmicutes_A	Clostridia	Oscillospirales	Oscillospiraceae	ER4	ER4 sp003522105	14.44	non-HMI	2048304	2077
GCA_003522945_1	Bacteria	Firmicutes_A	Clostridia	Oscillospirales	Oscillospiraceae	UBA738	UBA738 sp003522945	8.76	non-HMI	1840085	1874
GCA_003525075_1	Bacteria	Firmicutes_A	Clostridia	TANB77	CAG-508	CAG-269	CAG-269 sp003525075	7.52	non-HMI	1640338	1606
GCA_003525905_1	Bacteria	Firmicutes_A	Clostridia	Oscillospirales	Oscillospiraceae	CAG-110	CAG-110 sp003525905	13.57	non-HMI	2194606	2002
GCA_003526955_1	Bacteria	Firmicutes_A	Clostridia	Oscillospirales	Acutalibacteraceae	Ruminococcus_E	Ruminococcus_E sp003526955	24.17	non-HMI	1980825	1852
GCA_003531585_1	Bacteria	Firmicutes_A	Clostridia	Oscillospirales	Ruminococcaceae	CAG-115	CAG-115 sp003531585	24.66	non-HMI	2647573	2420
GCA_003538135_1	Bacteria	Firmicutes_A	Clostridia	Oscillospirales	Acutalibacteraceae	CAG-177	CAG-177 sp003538135	19.31	non-HMI	2159037	1986
GCA_004557245_1	Bacteria	Firmicutes_A	Clostridia_A	Christensenellales	CAG-138	SFEL01	SFEL01 sp004557245	14.24	non-HMI	2139860	2139
GCA_007197895_1	Bacteria	Bacteroidota	Bacteroidia	Bacteroidales	Bacteroidaceae	Bacteroides	Bacteroides sp900066265	23.78	non-HMI	5228156	4220
GCA_900066205_1	Bacteria	Firmicutes_A	Clostridia	Lachnospirales	Lachnospiraceae	Blautia_A	Blautia_A sp900066205	28.16	HMI	3675824	3371
GCA_900066355_1	Bacteria	Firmicutes_A	Clostridia	Lachnospirales	Lachnospiraceae	Blautia_A	Blautia_A sp900066355	28.28	HMI	3628508	3387
GCA_900066385_1	Bacteria	Firmicutes_A	Clostridia	Lachnospirales	Lachnospiraceae	GCA-900066575	GCA-900066575 sp900066385	26.71	HMI	3329580	3118
GCA_900066615_1	Bacteria	Firmicutes_A	Clostridia	Lachnospirales	Lachnospiraceae	UMGS1375	UMGS1375 sp900066615	26.51	HMI	3341490	3039
GCA_900066645_1	Bacteria	Firmicutes_A	Clostridia	Oscillospirales	Oscillospiraceae	Lawsonibacter	Lawsonibacter sp900066645	22.72	non-HMI	2891162	2820
GCA_900112995_1	Bacteria	Firmicutes_A	Clostridia	Lachnospirales	Lachnospiraceae	Lachnospira	Lachnospira rogosae	26.65	HMI	2817405	2545
GCA_900316325_1	Bacteria	Firmicutes_A	Clostridia	Lachnospirales	Lachnospiraceae	Lachnospira	Lachnospira sp900316325	24.55	non-HMI	2650795	2565
GCA_900317525_1	Bacteria	Firmicutes_A	Clostridia	Oscillospirales	Oscillospiraceae	ER4	ER4 sp900317525	14.97	non-HMI	1795399	1819
GCA_900317585_1	Bacteria	Firmicutes_A	Clostridia	Lachnospirales	Lachnospiraceae	Agathobacter	Agathobacter sp900317585	23.28	non-HMI	2574089	2407
GCA_900317855_1	Bacteria	Firmicutes_A	Clostridia	Oscillospirales	Oscillospiraceae	CAG-103	CAG-103 sp900317855	15.85	non-HMI	1958931	1865
GCA_900539115_1	Bacteria	Firmicutes_A	Clostridia	Lachnospirales	Lachnospiraceae	Eubacterium_F	Eubacterium_F sp900539115	25.35	non-HMI	2838254	2598
GCA_900539195_1	Bacteria	Firmicutes_A	Clostridia	Oscillospirales	Ruminococcaceae	Ruminiclostridium_E	Ruminiclostridium_E sp900539195	24.99	non-HMI	2476225	2227
GCA_900539695_1	Bacteria	Firmicutes_A	Clostridia	Oscillospirales	Ruminococcaceae	Gemmiger	Gemmiger sp900539695	22.39	non-HMI	2450107	2229
GCA_900539885_1	Bacteria	Firmicutes_A	Clostridia	Oscillospirales	Ruminococcaceae	Faecalibacterium	Faecalibacterium sp900539885	24.99	non-HMI	2401470	2205
GCA_900539945_1	Bacteria	Firmicutes_A	Clostridia	Oscillospirales	Ruminococcaceae	Faecalibacterium	Faecalibacterium sp900539945	25.69	non-HMI	2417777	2275
GCA_900540595_1	Bacteria	Firmicutes_A	Clostridia	Oscillospirales	Ruminococcaceae	Gemmiger	Gemmiger sp900540595	24.68	non-HMI	2666935	2408
GCA_900540775_1	Bacteria	Firmicutes_A	Clostridia	Oscillospirales	Ruminococcaceae	Gemmiger	Gemmiger sp900540775	22.8	non-HMI	2372101	2212
GCA_900540805_1	Bacteria	Firmicutes_A	Clostridia_A	Christensenellales	Borkfalkiaceae	QALS01	QALS01 sp003150575	18.03	non-HMI	3127238	2693
GCA_900541315_1	Bacteria	Firmicutes_A	Clostridia	Lachnospirales	Lachnospiraceae	Enterocloster	Enterocloster sp900541315	25.45	non-HMI	3056302	2810
GCA_900541905_1	Bacteria	Firmicutes_A	Clostridia	Oscillospirales	Acutalibacteraceae	UMGS1071	UMGS1071 sp900541905	26.28	non-HMI	2113856	2048
GCA_900542115_1	Bacteria	Firmicutes_A	Clostridia	Oscillospirales	Oscillospiraceae	Oscillibacter	Oscillibacter sp900542115	19.11	non-HMI	1861362	1893
GCA_900542245_1	Bacteria	Firmicutes_A	Clostridia	Peptostreptococcales	Anaerovoracaceae	CAG-238	CAG-238 sp900542245	16.52	non-HMI	2270996	2127
GCA_900542375_1	Bacteria	Firmicutes_A	Clostridia	Oscillospirales	Acutalibacteraceae	UMGS1071	UMGS1071 sp900542375	27.29	HMI	1947109	1926
GCA_900542395_1	Bacteria	Firmicutes_A	Clostridia_A	Christensenellales	CAG-74	SFFH01	SFFH01 sp900542395	15.74	non-HMI	2294663	2110
GCA_900542445_1	Bacteria	Firmicutes_A	Clostridia_A	Christensenellales	CAG-74	SFFH01	SFFH01 sp900542445	20.42	non-HMI	2685985	2456
GCA_900543575_1	Bacteria	Firmicutes_A	Clostridia	Lachnospirales	Lachnospiraceae	GCA-900066135	GCA-900066135 sp900543575	25.79	non-HMI	3111530	2838
GCA_900543625_1	Bacteria	Firmicutes_A	Clostridia	Oscillospirales	Oscillospiraceae	CAG-103	CAG-103 sp900543625	17.94	non-HMI	2043853	1906
GCA_900544105_1	Bacteria	Firmicutes_A	Clostridia	Oscillospirales	Oscillospiraceae	Oscillibacter	Oscillibacter sp900544105	19.29	non-HMI	2171635	2122
GCA_900544265_1	Bacteria	Bacteroidota	Bacteroidia	Bacteroidales	Rikenellaceae	Alistipes	Alistipes sp900544265	16.63	non-HMI	2342113	1936
GCA_900544435_1	Bacteria	Firmicutes	Bacilli	Erysipelotrichales	Erysipelatoclostridiaceae	Erysipelatoclostridium	Erysipelatoclostridium sp900544435	24.4	non-HMI	2360498	2546
GCA_900544825_1	Bacteria	Bacteroidota	Bacteroidia	Bacteroidales	Bacteroidaceae	Prevotella	Prevotella sp900544825	23.43	non-HMI	3294760	2735
GCA_900545175_1	Bacteria	Firmicutes_A	Clostridia	Lachnospirales	Lachnospiraceae	CAG-882	CAG-882 sp900545175	23.63	non-HMI	2902874	2484
GCA_900545585_1	Bacteria	Firmicutes_A	Clostridia	Oscillospirales	Oscillospiraceae	CAG-83	CAG-83 sp900545585	16.12	non-HMI	2207572	2077
GCA_900545925_1	Bacteria	Firmicutes_A	Clostridia	Oscillospirales	Oscillospiraceae	CAG-170	CAG-170 sp900545925	18.49	non-HMI	3215858	3044
GCA_900546075_1	Bacteria	Firmicutes_A	Clostridia	Oscillospirales	Oscillospiraceae	CAG-110	CAG-110 sp900546075	16.1	non-HMI	2195070	2102
GCA_900546265_1	Bacteria	Firmicutes_A	Clostridia	Oscillospirales	Acutalibacteraceae	UMGS856	UMGS856 sp900546265	22.94	non-HMI	3701038	3263
GCA_900546295_1	Bacteria	Firmicutes_A	Clostridia	Oscillospirales	Oscillospiraceae	ER4	ER4 sp900546295	15.25	non-HMI	1724790	1708
GCA_900546495_1	Bacteria	Firmicutes_A	Clostridia	Lachnospirales	Lachnospiraceae	Eubacterium_I	Eubacterium_I sp900546495	25.99	non-HMI	2650866	2365
GCA_900546535_1	Bacteria	Bacteroidota	Bacteroidia	Bacteroidales	Bacteroidaceae	Prevotella	Prevotella sp900546535	21.76	non-HMI	3143373	2556
GCA_900546685_1	Bacteria	Firmicutes_A	Clostridia_A	Christensenellales	QAND01	UMGS1975	UMGS1975 sp900546685	18.42	non-HMI	1685698	1887
GCA_900546885_1	Bacteria	Firmicutes_A	Clostridia	Oscillospirales	Ruminococcaceae	Ruthenibacterium	Ruthenibacterium sp900546885	16.55	non-HMI	2131819	1992
GCA_900547185_1	Bacteria	Firmicutes_A	Clostridia	Oscillospirales	Ruminococcaceae	UMGS966	UMGS966 sp900547185	13.53	non-HMI	1905597	1958
GCA_900547385_1	Bacteria	Firmicutes_A	Clostridia	Oscillospirales	Ruminococcaceae	Angelakisella	Angelakisella sp900547385	12.54	non-HMI	1838346	1773
GCA_900547745_1	Bacteria	Firmicutes_A	Clostridia	Oscillospirales	Oscillospiraceae	CAG-83	CAG-83 sp900547745	11.85	non-HMI	1825388	1769
GCA_900548125_1	Bacteria	Firmicutes_A	Clostridia_A	Christensenellales	CAG-74	SFFH01	SFFH01 sp900548125	16.25	non-HMI	2284950	2125
GCA_900548245_1	Bacteria	Firmicutes_A	Clostridia	Lachnospirales	Lachnospiraceae	Blautia_A	Blautia_A sp900548245	27.92	HMI	2817086	2756
GCA_900548305_1	Bacteria	Firmicutes_A	Clostridia	Oscillospirales	Acutalibacteraceae	UMGS1071	UMGS1071 sp900548305	26.84	HMI	1746683	1689
GCA_900548505_1	Bacteria	Firmicutes_A	Clostridia	Oscillospirales	Oscillospiraceae	Oscillibacter	Oscillibacter sp900548505	19.45	non-HMI	2224250	2253
GCA_900548595_1	Bacteria	Firmicutes_A	Clostridia	Lachnospirales	Anaerotignaceae	UMGS1670	UMGS1670 sp900548595	21.69	non-HMI	1890000	1986
GCA_900548825_1	Bacteria	Firmicutes_A	Clostridia	Lachnospirales	Lachnospiraceae	Coprococcus_A	Coprococcus_A sp900548825	24.58	non-HMI	2569987	2446
GCA_900549125_1	Bacteria	Firmicutes_A	Clostridia	Peptostreptococcales	Anaerovoracaceae	UBA1191	UBA1191 sp900549125	19.61	non-HMI	1918558	1920
GCA_900549405_1	Bacteria	Firmicutes_A	Clostridia	Oscillospirales	Oscillospiraceae	Lawsonibacter	Lawsonibacter sp900549405	23.42	non-HMI	2046203	1996
GCA_900549635_1	Bacteria	Firmicutes_A	Clostridia	Oscillospirales	Oscillospiraceae	CAG-170	CAG-170 sp900549635	18.03	non-HMI	2169390	2123
GCA_900549795_1	Bacteria	Firmicutes_A	Clostridia	Oscillospirales	Oscillospiraceae	Flavonifractor	Flavonifractor sp900549795	25.49	non-HMI	2831746	2720
GCA_900549885_1	Bacteria	Firmicutes_A	Clostridia	Oscillospirales	Oscillospiraceae	UBA9475	UBA9475 sp900549885	18.25	non-HMI	2703915	2726
GCA_900550165_1	Bacteria	Firmicutes_A	Clostridia	Oscillospirales	Oscillospiraceae	ER4	ER4 sp900550165	14.27	non-HMI	1784251	1770
GCA_900550175_1	Bacteria	Firmicutes_C	Negativicutes	Veillonellales	Veillonellaceae	Veillonella	Veillonella sp900550175	23.64	non-HMI	1856024	1870
GCA_900550845_1	Bacteria	Firmicutes_A	Clostridia	Lachnospirales	Lachnospiraceae	Agathobacter	Agathobacter sp900550845	22.85	non-HMI	3755363	3771
GCA_900551275_1	Bacteria	Bacteroidota	Bacteroidia	Bacteroidales	Bacteroidaceae	Prevotella	Prevotella sp900551275	20.75	non-HMI	3746392	3304
GCA_900551355_1	Bacteria	Firmicutes_A	Clostridia	Oscillospirales	Oscillospiraceae	CAG-83	CAG-83 sp900551355	10.46	non-HMI	1569700	1659
GCA_900551615_1	Bacteria	Firmicutes_A	Clostridia	TANB77	CAG-508	CAG-269	CAG-269 sp900551615	8.92	non-HMI	1608604	1605
GCA_900551715_1	Bacteria	Firmicutes_A	Clostridia	Lachnospirales	Lachnospiraceae	Blautia_A	Blautia_A sp900551715	21.91	non-HMI	2543992	2258
GCA_900552015_1	Bacteria	Firmicutes_A	Clostridia	Oscillospirales	Oscillospiraceae	ER4	ER4 sp900552015	16.72	non-HMI	1903890	1882
GCA_900552275_1	Bacteria	Firmicutes_A	Clostridia	Lachnospirales	Lachnospiraceae	Eubacterium_G	Eubacterium_G sp900552275	21.67	non-HMI	3376997	3510
GCA_900552445_1	Bacteria	Firmicutes_C	Negativicutes	Veillonellales	Veillonellaceae	Veillonella	Veillonella sp900552445	19.55	non-HMI	1358103	1413
GCA_900552625_1	Bacteria	Firmicutes_A	Clostridia_A	Christensenellales	Borkfalkiaceae	QALS01	QALS01 sp900552625	15.9	non-HMI	2056876	1774
GCA_900552665_1	Bacteria	Firmicutes_A	Clostridia	Lachnospirales	Lachnospiraceae	Roseburia	Roseburia sp900552665	25.1	non-HMI	4543040	4446
GCA_900553545_1	Bacteria	Firmicutes_A	Clostridia	Oscillospirales	Oscillospiraceae	CAG-170	CAG-170 sp900553545	15.7	non-HMI	1689282	1673
GCA_900553635_1	Bacteria	Firmicutes_A	Clostridia	Lachnospirales	Lachnospiraceae	GCA-900066575	GCA-900066575 sp900553635	24.19	non-HMI	2403682	2404
GCA_900554965_1	Bacteria	Firmicutes_A	Clostridia	Lachnospirales	Lachnospiraceae	Anaerobutyricum	Anaerobutyricum sp900554965	22.84	non-HMI	4673304	4769
GCA_900555475_1	Bacteria	Bacteroidota	Bacteroidia	Bacteroidales	Coprobacteraceae	Coprobacter	Coprobacter sp900555475	19.41	non-HMI	4736700	4723
GCA_900555925_1	Bacteria	Firmicutes_A	Clostridia_A	Christensenellales	Borkfalkiaceae	QALS01	QALS01 sp900555925	10.61	non-HMI	1632410	1507
GCA_900556695_1	Bacteria	Firmicutes_A	Clostridia	TANB77	CAG-508	CAG-269	CAG-269 sp900556695	7.33	non-HMI	1224517	1357
GCA_900556785_1	Bacteria	Firmicutes_C	Negativicutes	Veillonellales	Veillonellaceae	Veillonella	Veillonella sp900556785	19.89	non-HMI	1620156	1554
GCA_900557055_1	Bacteria	Firmicutes_A	Clostridia	Lachnospirales	Lachnospiraceae	Agathobacter	Agathobacter sp900557055	20.26	non-HMI	3632340	4088
GCA_900557155_1	Bacteria	Firmicutes_A	Clostridia	Oscillospirales	Ruminococcaceae	UBA3818	UBA3818 sp900557155	12.14	non-HMI	1594232	1864
GCF_000011065_1	Bacteria	Bacteroidota	Bacteroidia	Bacteroidales	Bacteroidaceae	Bacteroides	Bacteroides thetaiotaomicron	24.8	non-HMI	6293399	4961
GCF_000012825_1	Bacteria	Bacteroidota	Bacteroidia	Bacteroidales	Bacteroidaceae	Phocaeicola	Phocaeicola vulgatus	25.69	non-HMI	5163189	4256
GCF_000012845_1	Bacteria	Bacteroidota	Bacteroidia	Bacteroidales	Tannerellaceae	Parabacteroides	Parabacteroides distasonis	25.27	non-HMI	4811379	4003
GCF_000020605_1	Bacteria	Firmicutes_A	Clostridia	Lachnospirales	Lachnospiraceae	Agathobacter	Agathobacter rectalis	26.31	non-HMI	3449685	3301
GCF_000024945_1	Bacteria	Firmicutes_C	Negativicutes	Veillonellales	Veillonellaceae	Veillonella	Veillonella parvula	25.31	non-HMI	2132142	1907
GCF_000025985_1	Bacteria	Bacteroidota	Bacteroidia	Bacteroidales	Bacteroidaceae	Bacteroides	Bacteroides fragilis	25.64	non-HMI	5241700	4348
GCF_000026325_1	Bacteria	Proteobacteria	Gammaproteobacteria	Enterobacterales	Enterobacteriaceae	Escherichia	Escherichia coli_D	29.92	HMI	5358200	5016
GCF_000146185_1	Bacteria	Firmicutes_A	Clostridia	Lachnospirales	Lachnospiraceae	Lachnospira	Lachnospira eligens	27.49	HMI	2831389	2689
GCF_000153885_1	Bacteria	Firmicutes_A	Clostridia	Lachnospirales	Lachnospiraceae	Eubacterium_G	Eubacterium_G ventriosum	23.03	non-HMI	2870795	2598
GCF_000153905_1	Bacteria	Firmicutes_A	Clostridia	Lachnospirales	Lachnospiraceae	Blautia_A	Blautia_A obeum	26.55	HMI	3625508	3587
GCF_000153925_1	Bacteria	Firmicutes_A	Clostridia	Lachnospirales	Lachnospiraceae	Mediterraneibacter	Mediterraneibacter torques	25.99	non-HMI	2741706	2527
GCF_000154065_1	Bacteria	Firmicutes_A	Clostridia	Lachnospirales	Lachnospiraceae	Dorea	Dorea longicatena	24.16	non-HMI	2915433	2792
GCF_000154105_1	Bacteria	Bacteroidota	Bacteroidia	Bacteroidales	Tannerellaceae	Parabacteroides	Parabacteroides merdae	24.25	non-HMI	4434377	3751
GCF_000154205_1	Bacteria	Bacteroidota	Bacteroidia	Bacteroidales	Bacteroidaceae	Bacteroides	Bacteroides uniformis	24.68	non-HMI	4719097	3878
GCF_000154325_1	Bacteria	Firmicutes_A	Clostridia	Oscillospirales	Ruminococcaceae	Ruminiclostridium_E	Ruminiclostridium_E siraeum	23.55	non-HMI	2697034	2391
GCF_000154345_1	Bacteria	Firmicutes_A	Clostridia	Oscillospirales	Acutalibacteraceae	Clostridium_A	Clostridium_A leptum	23.47	non-HMI	3270209	2935
GCF_000154425_1	Bacteria	Firmicutes_A	Clostridia	Lachnospirales	Lachnospiraceae	Coprococcus	Coprococcus eutactus	24.19	non-HMI	3102987	2684
GCF_000154465_1	Bacteria	Bacteroidota	Bacteroidia	Bacteroidales	Rikenellaceae	Alistipes	Alistipes putredinis	15.72	non-HMI	2550678	2285
GCF_000154525_1	Bacteria	Bacteroidota	Bacteroidia	Bacteroidales	Bacteroidaceae	Bacteroides	Bacteroides stercoris	24.11	non-HMI	4009829	3386
GCF_000154805_1	Bacteria	Firmicutes	Bacilli	Erysipelotrichales	Erysipelatoclostridiaceae	Erysipelatoclostridium	Erysipelatoclostridium spiroforme	24.98	non-HMI	2507885	2406
GCF_000154845_1	Bacteria	Bacteroidota	Bacteroidia	Bacteroidales	Bacteroidaceae	Phocaeicola	Phocaeicola coprocola	23.66	non-HMI	4300117	3871
GCF_000155205_1	Bacteria	Firmicutes_A	Clostridia	Lachnospirales	Lachnospiraceae	Mediterraneibacter	Mediterraneibacter lactaris	25.94	non-HMI	2731235	2528
GCF_000155815_1	Bacteria	Bacteroidota	Bacteroidia	Bacteroidales	Bacteroidaceae	Bacteroides	Bacteroides eggerthii	23.41	non-HMI	4197635	3440
GCF_000155875_1	Bacteria	Firmicutes_A	Clostridia	Lachnospirales	Lachnospiraceae	Bariatricus	Bariatricus comes	22.75	non-HMI	3242215	3548
GCF_000156075_1	Bacteria	Bacteroidota	Bacteroidia	Bacteroidales	Bacteroidaceae	Phocaeicola	Phocaeicola dorei	25.4	non-HMI	5566217	4549
GCF_000156195_1	Bacteria	Bacteroidota	Bacteroidia	Bacteroidales	Bacteroidaceae	Bacteroides	Bacteroides finegoldii	23.39	non-HMI	4892401	4146
GCF_000156495_1	Bacteria	Bacteroidota	Bacteroidia	Bacteroidales	Tannerellaceae	Parabacteroides	Parabacteroides johnsonii	23.43	non-HMI	4787097	3911
GCF_000157935_1	Bacteria	Bacteroidota	Bacteroidia	Bacteroidales	Bacteroidaceae	Prevotella	Prevotella copri	23.76	non-HMI	3512473	3044
GCF_000157995_1	Bacteria	Firmicutes	Bacilli	Erysipelotrichales	Erysipelotrichaceae	Holdemania	Holdemania filiformis	15.6	non-HMI	3932923	3544
GCF_000158035_1	Bacteria	Bacteroidota	Bacteroidia	Bacteroidales	Bacteroidaceae	Bacteroides	Bacteroides cellulosilyticus	24.18	non-HMI	6870144	5136
GCF_000160055_1	Bacteria	Firmicutes_C	Negativicutes	Veillonellales	Dialisteraceae	Dialister	Dialister invisus	18.05	non-HMI	1895960	1784
GCF_000162015_1	Bacteria	Firmicutes_A	Clostridia	Oscillospirales	Ruminococcaceae	Faecalibacterium	Faecalibacterium prausnitzii_C	25.5	non-HMI	3090349	3002
GCF_000164675_2	Bacteria	Firmicutes	Bacilli	Lactobacillales	Streptococcaceae	Streptococcus	Streptococcus parasanguinis	21.5	non-HMI	2153652	1991
GCF_000169235_1	Bacteria	Firmicutes_A	Clostridia	Lachnospirales	Lachnospiraceae	Dorea	Dorea formicigenerans	26.63	HMI	3186031	3063
GCF_000172175_1	Bacteria	Bacteroidota	Bacteroidia	Bacteroidales	Bacteroidaceae	Bacteroides	Bacteroides intestinalis	25.53	non-HMI	6052596	4743
GCF_000173975_1	Bacteria	Firmicutes_A	Clostridia	Lachnospirales	Lachnospiraceae	Anaerobutyricum	Anaerobutyricum hallii	27.35	HMI	3290996	2945
GCF_000174195_1	Bacteria	Firmicutes_A	Clostridia	Lachnospirales	Lachnospiraceae	Roseburia	Roseburia inulinivorans	25.13	non-HMI	4048462	4150
GCF_000180035_1	Bacteria	Firmicutes	Bacilli	Lactobacillales	Streptococcaceae	Streptococcus	Streptococcus parasanguinis_C	20.4	non-HMI	2050302	2004
GCF_000187895_1	Bacteria	Bacteroidota	Bacteroidia	Bacteroidales	Bacteroidaceae	Phocaeicola	Phocaeicola plebeius	23.81	non-HMI	4421924	3670
GCF_000188295_1	Bacteria	Firmicutes	Bacilli	Lactobacillales	Streptococcaceae	Streptococcus	Streptococcus vestibularis	24.25	non-HMI	1872773	1854
GCF_000190535_1	Bacteria	Bacteroidota	Bacteroidia	Bacteroidales	Marinifilaceae	Odoribacter	Odoribacter splanchnicus	20.2	non-HMI	4392288	3721
GCF_000191405_1	Bacteria	Proteobacteria	Gammaproteobacteria	Enterobacterales	Pasteurellaceae	Haemophilus_D	Haemophilus_D parainfluenzae	24.25	non-HMI	2124757	2009
GCF_000205025_1	Bacteria	Proteobacteria	Gammaproteobacteria	Burkholderiales	Burkholderiaceae	Parasutterella	Parasutterella excrementihominis	23.46	non-HMI	2831696	2529
GCF_000210575_1	Bacteria	Bacteroidota	Bacteroidia	Bacteroidales	Rikenellaceae	Alistipes	Alistipes shahii	18.26	non-HMI	3763317	3059
GCF_000210895_1	Bacteria	Proteobacteria	Gammaproteobacteria	Enterobacterales	Pasteurellaceae	Haemophilus_D	Haemophilus_D parainfluenzae_A	23.99	non-HMI	2086875	2002
GCF_000225345_1	Bacteria	Firmicutes_A	Clostridia	Lachnospirales	Lachnospiraceae	Roseburia	Roseburia hominis	27	HMI	3592125	3250
GCF_000231275_1	Bacteria	Bacteroidota	Bacteroidia	Bacteroidales	Rikenellaceae	Alistipes_A	Alistipes_A indistinctus	23.65	non-HMI	2855429	2334
GCF_000233955_1	Bacteria	Bacteroidota	Bacteroidia	Bacteroidales	Bacteroidaceae	Paraprevotella	Paraprevotella clara	23.59	non-HMI	4233768	3515
GCF_000239295_1	Bacteria	Firmicutes_A	Clostridia	Oscillospirales	Oscillospiraceae	Flavonifractor	Flavonifractor plautii	26.7	HMI	3820124	3844
GCF_000265365_1	Bacteria	Bacteroidota	Bacteroidia	Bacteroidales	Rikenellaceae	Alistipes	Alistipes finegoldii	19.05	non-HMI	3734239	3190
GCF_000296465_1	Bacteria	Bacteroidota	Bacteroidia	Bacteroidales	Barnesiellaceae	Barnesiella	Barnesiella intestinihominis	20.91	non-HMI	3443906	2789
GCF_000297775_1	Bacteria	Proteobacteria	Gammaproteobacteria	Burkholderiales	Burkholderiaceae	Sutterella	Sutterella wadsworthensis_A	21.16	non-HMI	2725870	2377
GCF_000311925_1	Bacteria	Bacteroidota	Bacteroidia	Bacteroidales	Rikenellaceae	Alistipes	Alistipes obesi	18.24	non-HMI	3163675	2616
GCF_000312145_1	Bacteria	Bacteroidota	Bacteroidia	Bacteroidales	Rikenellaceae	Alistipes	Alistipes senegalensis	19.94	non-HMI	4017609	3153
GCF_000321205_1	Bacteria	Bacteroidota	Bacteroidia	Bacteroidales	Rikenellaceae	Alistipes_A	Alistipes_A ihumii	22.1	non-HMI	2772824	2303
GCF_000332875_2	Bacteria	Firmicutes_A	Clostridia	Lachnospirales	Lachnospiraceae	Anaerostipes	Anaerostipes hadrus	26.52	HMI	2772228	2712
GCF_000374505_1	Bacteria	Bacteroidota	Bacteroidia	Bacteroidales	Rikenellaceae	Alistipes	Alistipes onderdonkii	18.89	non-HMI	3865648	3175
GCF_000381365_1	Bacteria	Bacteroidota	Bacteroidia	Bacteroidales	Bacteroidaceae	Bacteroides	Bacteroides salyersiae	24.55	non-HMI	5315450	4181
GCF_000382445_1	Bacteria	Bacteroidota	Bacteroidia	Bacteroidales	Bacteroidaceae	Phocaeicola	Phocaeicola massiliensis	24.09	non-HMI	4646209	3938
GCF_000424325_1	Bacteria	Firmicutes_A	Clostridia	Lachnospirales	Lachnospiraceae	Enterocloster	Enterocloster clostridioformis_A	28.27	HMI	4943165	4944
GCF_000425045_1	Bacteria	Firmicutes_C	Negativicutes	Acidaminococcales	Acidaminococcaceae	Acidaminococcus	Acidaminococcus intestini	20.15	non-HMI	2282467	2233
GCF_000448565_1	Bacteria	Firmicutes	Bacilli	Lactobacillales	Streptococcaceae	Streptococcus	Streptococcus sp000448565	20.7	non-HMI	2334592	2220
GCF_000468015_1	Bacteria	Firmicutes_A	Clostridia	Oscillospirales	Ruminococcaceae	Ruminococcus_C	Ruminococcus_C callidus	26.53	HMI	3096487	2819
GCF_000469345_1	Bacteria	Firmicutes_A	Clostridia	Lachnospirales	Lachnospiraceae	Eubacterium_I	Eubacterium_I ramulus	27.41	HMI	3447136	3194
GCF_000473955_1	Bacteria	Bacteroidota	Bacteroidia	Bacteroidales	Coprobacteraceae	Coprobacter	Coprobacter fastidiosus	23.26	non-HMI	3413912	2750
GCF_000484655_1	Bacteria	Firmicutes_A	Clostridia	Lachnospirales	Lachnospiraceae	Blautia_A	Blautia_A wexlerae	27.47	HMI	4508468	4280
GCF_000508885_1	Bacteria	Firmicutes_A	Clostridia	Oscillospirales	Oscillospiraceae	Flavonifractor	Flavonifractor sp000508885	22.19	non-HMI	4569182	5480
GCF_000519105_1	Bacteria	Bacteroidota	Bacteroidia	Bacteroidales	Marinifilaceae	Butyricimonas	Butyricimonas virosa	18.66	non-HMI	4717857	3938
GCF_000614125_1	Bacteria	Bacteroidota	Bacteroidia	Bacteroidales	Bacteroidaceae	Bacteroides	Bacteroides rodentium	20.69	non-HMI	4884492	4885
GCF_000723465_1	Bacteria	Firmicutes_A	Clostridia	Oscillospirales	Ruminococcaceae	Ruminococcus_D	Ruminococcus_D bicirculans	27.03	HMI	2968500	2787
GCF_000742135_1	Bacteria	Proteobacteria	Gammaproteobacteria	Enterobacterales	Enterobacteriaceae	Klebsiella	Klebsiella pneumoniae	30.83	HMI	5545784	5255
GCF_000752095_2	Bacteria	Firmicutes	Bacilli	Erysipelotrichales	Erysipelatoclostridiaceae	Erysipelatoclostridium	Erysipelatoclostridium sp000752095	24.63	non-HMI	2932852	2980
GCF_000765235_1	Bacteria	Firmicutes_A	Clostridia	Oscillospirales	Oscillospiraceae	ER4	ER4 sp000765235	20.14	non-HMI	2729704	2801
GCF_000785515_1	Bacteria	Firmicutes	Bacilli	Lactobacillales	Streptococcaceae	Streptococcus	Streptococcus salivarius	24.19	non-HMI	2188923	2008
GCF_000803105_1	Bacteria	Bacteroidota	Bacteroidia	Bacteroidales	Coprobacteraceae	Coprobacter	Coprobacter secundus	22.56	non-HMI	4138744	3165
GCF_000828055_2	Bacteria	Proteobacteria	Gammaproteobacteria	Enterobacterales	Enterobacteriaceae	Klebsiella	Klebsiella variicola	30.83	HMI	5521203	5163
GCF_000949455_1	Bacteria	Firmicutes_A	Clostridia	Oscillospirales	Ruminococcaceae	Ruthenibacterium	Ruthenibacterium lactatiformans	22.2	non-HMI	4111078	4001
GCF_000963275_1	Bacteria	Firmicutes	Bacilli	Lactobacillales	Streptococcaceae	Streptococcus	Streptococcus parasanguinis_B	20.9	non-HMI	2098457	1980
GCF_000969835_1	Bacteria	Bacteroidota	Bacteroidia	Bacteroidales	Tannerellaceae	Parabacteroides	Parabacteroides goldsteinii	25.38	non-HMI	6486757	5081
GCF_001073155_1	Bacteria	Firmicutes	Bacilli	Lactobacillales	Streptococcaceae	Streptococcus	Streptococcus parasanguinis_D	20.4	non-HMI	2121511	2065
GCF_001074805_1	Bacteria	Firmicutes	Bacilli	Lactobacillales	Streptococcaceae	Streptococcus	Streptococcus parasanguinis_A	22.9	non-HMI	2185482	2169
GCF_001304995_1	Bacteria	Firmicutes_A	Clostridia	Lachnospirales	Anaerotignaceae	Anaerotignum	Anaerotignum sp001304995	21.98	non-HMI	2727522	3097
GCF_001312505_1	Bacteria	Firmicutes_A	Clostridia	Lachnospirales	Lachnospiraceae	Mediterraneibacter	Mediterraneibacter faecis	24.36	non-HMI	3259449	3893
GCF_001314995_1	Bacteria	Bacteroidota	Bacteroidia	Bacteroidales	Bacteroidaceae	Bacteroides	Bacteroides ovatus	24.55	non-HMI	6472489	4961
GCF_001404655_1	Bacteria	Firmicutes_A	Clostridia	Lachnospirales	Lachnospiraceae	Anaerostipes	Anaerostipes hadrus_A	26.38	non-HMI	2459729	2378
GCF_001404675_1	Bacteria	Firmicutes_A	Clostridia	Lachnospirales	Lachnospiraceae	Coprococcus	Coprococcus eutactus_A	24.19	non-HMI	3088292	2712
GCF_001404875_1	Bacteria	Firmicutes_A	Clostridia	Lachnospirales	Lachnospiraceae	Dorea	Dorea longicatena_B	24.37	non-HMI	3411049	3255
GCF_001405555_1	Bacteria	Firmicutes_A	Clostridia	Lachnospirales	Lachnospiraceae	Fusicatenibacter	Fusicatenibacter saccharivorans	27.4	HMI	3653886	3317
GCF_001405615_1	Bacteria	Firmicutes_A	Clostridia	Lachnospirales	Lachnospiraceae	Agathobacter	Agathobacter faecis	27.11	HMI	3567818	3535
GCF_001414325_1	Bacteria	Firmicutes_A	Clostridia	Lachnospirales	Lachnospiraceae	TF01-11	TF01-11 sp001414325	26.81	HMI	3610525	3141
GCF_001487165_1	Bacteria	Firmicutes_A	Clostridia	Lachnospirales	Lachnospiraceae	Blautia_A	Blautia_A massiliensis	28.6	HMI	3717343	3402
GCF_001553315_1	Bacteria	Firmicutes_C	Negativicutes	Veillonellales	Veillonellaceae	Veillonella	Veillonella dispar_A	25.81	non-HMI	2045490	1979
GCF_001553335_1	Bacteria	Firmicutes_C	Negativicutes	Veillonellales	Veillonellaceae	Veillonella	Veillonella parvula_A	25.31	non-HMI	2050442	1886
GCF_001556435_1	Bacteria	Firmicutes	Bacilli	Lactobacillales	Streptococcaceae	Streptococcus	Streptococcus sp001556435	23.27	non-HMI	2108505	2074
GCF_001679485_1	Bacteria	Proteobacteria	Gammaproteobacteria	Enterobacterales	Pasteurellaceae	Haemophilus_D	Haemophilus_D sp001679485	23.99	non-HMI	2091064	2078
GCF_001815355_1	Bacteria	Proteobacteria	Gammaproteobacteria	Enterobacterales	Pasteurellaceae	Haemophilus_D	Haemophilus_D sp001815355	23.25	non-HMI	1904337	1833
GCF_002161215_1	Bacteria	Firmicutes_A	Clostridia	Oscillospirales	Oscillospiraceae	Flavonifractor	Flavonifractor sp002161215	27.04	HMI	3882968	3733
GCF_002161485_1	Bacteria	Bacteroidota	Bacteroidia	Bacteroidales	Marinifilaceae	Butyricimonas	Butyricimonas sp002161485	18.51	non-HMI	5210888	4107
GCF_002222615_2	Bacteria	Bacteroidota	Bacteroidia	Bacteroidales	Bacteroidaceae	Bacteroides	Bacteroides caccae	24.5	non-HMI	4570803	3694
GCF_002224675_1	Bacteria	Bacteroidota	Bacteroidia	Bacteroidales	Bacteroidaceae	Prevotella	Prevotella copri_A	23.48	non-HMI	3920563	3335
GCF_002234575_2	Bacteria	Firmicutes_A	Clostridia	Lachnospirales	Lachnospiraceae	Enterocloster	Enterocloster bolteae	29.48	HMI	6614036	6060
GCF_002549755_1	Bacteria	Firmicutes_A	Clostridia	Oscillospirales	Ruminococcaceae	Faecalibacterium	Faecalibacterium prausnitzii_D	26.19	non-HMI	3043493	2992
GCF_002549775_1	Bacteria	Firmicutes_A	Clostridia	Oscillospirales	Ruminococcaceae	Faecalibacterium	Faecalibacterium prausnitzii_F	27.05	HMI	2822738	2702
GCF_002549975_1	Bacteria	Firmicutes_A	Clostridia	Oscillospirales	Ruminococcaceae	Faecalibacterium	Faecalibacterium prausnitzii_H	25.75	non-HMI	3006602	2863
GCF_002550015_1	Bacteria	Firmicutes_A	Clostridia	Oscillospirales	Ruminococcaceae	Faecalibacterium	Faecalibacterium prausnitzii_A	25.27	non-HMI	2915240	2770
GCF_002550035_1	Bacteria	Firmicutes_A	Clostridia	Oscillospirales	Ruminococcaceae	Faecalibacterium	Faecalibacterium prausnitzii_E	25.62	non-HMI	3019317	2967
GCF_002834225_1	Bacteria	Firmicutes_A	Clostridia	Oscillospirales	Acutalibacteraceae	Ruminococcus_E	Ruminococcus_E bromii	25.38	non-HMI	2151595	2006
GCF_002834235_1	Bacteria	Firmicutes_A	Clostridia	Oscillospirales	Acutalibacteraceae	Ruminococcus_E	Ruminococcus_E bromii_B	24.88	non-HMI	2400097	2249
GCF_002849695_1	Bacteria	Bacteroidota	Bacteroidia	Bacteroidales	Bacteroidaceae	Bacteroides	Bacteroides fragilis_A	25.31	non-HMI	5315431	4511
GCF_002874775_1	Bacteria	Firmicutes_A	Clostridia	Monoglobales	Monoglobaceae	Monoglobus	Monoglobus pectinilyticus	24.97	non-HMI	2759678	2279
GCF_002949675_1	Bacteria	Proteobacteria	Gammaproteobacteria	Enterobacterales	Enterobacteriaceae	Escherichia	Escherichia dysenteriae	29.59	HMI	4578459	5326
GCF_002950215_1	Bacteria	Proteobacteria	Gammaproteobacteria	Enterobacterales	Enterobacteriaceae	Escherichia	Escherichia flexneri	29.59	HMI	4938295	5063
GCF_002959615_1	Bacteria	Firmicutes_A	Clostridia	Lachnospirales	Lachnospiraceae	Ruminococcus_B	Ruminococcus_B gnavus	28.49	HMI	3570397	3557
GCF_002959775_1	Bacteria	Firmicutes_C	Negativicutes	Veillonellales	Veillonellaceae	Veillonella	Veillonella rogosae	25.64	non-HMI	2187106	2046
GCF_002959895_1	Bacteria	Firmicutes_C	Negativicutes	Veillonellales	Veillonellaceae	Veillonella	Veillonella infantium	25.81	non-HMI	2021343	1880
GCF_003011855_2	Bacteria	Firmicutes_A	Clostridia	Lachnospirales	Lachnospiraceae	Ruminococcus_A	Ruminococcus_A sp003011855	28.71	HMI	3411519	3087
GCF_003024675_1	Bacteria	Firmicutes	Bacilli	Erysipelotrichales	Erysipelatoclostridiaceae	Erysipelatoclostridium	Erysipelatoclostridium sp003024675	24.46	non-HMI	2525977	2692
GCF_003024715_1	Bacteria	Firmicutes_A	Clostridia	Lachnospirales	Lachnospiraceae	Clostridium_Q	Clostridium_Q sp003024715	24.85	non-HMI	3277016	2976
GCF_003096535_1	Bacteria	Firmicutes_A	Clostridia	Oscillospirales	Butyricicoccaceae	Agathobaculum	Agathobaculum butyriciproducens	25.14	non-HMI	2809383	2593
GCF_003112755_1	Bacteria	Firmicutes_A	Clostridia	Oscillospirales	Oscillospiraceae	Lawsonibacter	Lawsonibacter asaccharolyticus	24.27	non-HMI	4282156	4373
GCF_003252725_1	Bacteria	Proteobacteria	Gammaproteobacteria	Enterobacterales	Pasteurellaceae	Haemophilus_D	Haemophilus_D parainfluenzae_L	23.25	non-HMI	1999882	1943
GCF_003252755_1	Bacteria	Proteobacteria	Gammaproteobacteria	Enterobacterales	Pasteurellaceae	Haemophilus_D	Haemophilus_D parainfluenzae_N	23.99	non-HMI	2080350	2028
GCF_003252795_1	Bacteria	Proteobacteria	Gammaproteobacteria	Enterobacterales	Pasteurellaceae	Haemophilus_D	Haemophilus_D parainfluenzae_K	23.25	non-HMI	1898682	1831
GCF_003253005_1	Bacteria	Proteobacteria	Gammaproteobacteria	Enterobacterales	Pasteurellaceae	Haemophilus_D	Haemophilus_D parainfluenzae_M	24.25	non-HMI	1928811	1868
GCF_003269275_1	Bacteria	Firmicutes_C	Negativicutes	Acidaminococcales	Acidaminococcaceae	Phascolarctobacterium	Phascolarctobacterium faecium	24.46	non-HMI	2317131	2196
GCF_003287405_1	Bacteria	Firmicutes_A	Clostridia	Oscillospirales	Ruminococcaceae	Faecalibacterium	Faecalibacterium prausnitzii_J	25.6	non-HMI	3032382	2911
GCF_003287495_1	Bacteria	Firmicutes_A	Clostridia	Oscillospirales	Ruminococcaceae	Faecalibacterium	Faecalibacterium prausnitzii_I	25.44	non-HMI	2681793	2489
GCF_003315195_1	Bacteria	Proteobacteria	Gammaproteobacteria	Burkholderiales	Burkholderiaceae	Sutterella	Sutterella wadsworthensis	22.17	non-HMI	2934640	2416
GCF_003324125_1	Bacteria	Firmicutes_A	Clostridia	Oscillospirales	Ruminococcaceae	Gemmiger	Gemmiger qucibialis	25.71	non-HMI	3508961	3175
GCF_003324185_1	Bacteria	Firmicutes_A	Clostridia	Oscillospirales	Ruminococcaceae	Faecalibacterium	Faecalibacterium prausnitzii	25.27	non-HMI	3031166	2877
GCF_003425665_1	Bacteria	Firmicutes_A	Clostridia	Oscillospirales	Oscillospiraceae	Evtepia	Evtepia gabavorous	22.11	non-HMI	2494407	2409
GCF_003435375_1	Bacteria	Firmicutes_A	Clostridia	Lachnospirales	Lachnospiraceae	CAG-81	CAG-81 sp900066535	26.31	non-HMI	3752211	3580
GCF_003435815_1	Bacteria	Firmicutes_A	Clostridia	Lachnospirales	Lachnospiraceae	Dorea	Dorea sp000433215	23.36	non-HMI	2920802	2749
GCF_003437535_1	Bacteria	Bacteroidota	Bacteroidia	Bacteroidales	Bacteroidaceae	Phocaeicola	Phocaeicola plebeius_A	24.06	non-HMI	3968058	3297
GCF_003458705_1	Bacteria	Firmicutes_A	Clostridia	Lachnospirales	Lachnospiraceae	Lachnospira	Lachnospira sp003537285	25.71	non-HMI	2804290	2970
GCF_003460605_1	Bacteria	Firmicutes_A	Clostridia	Lachnospirales	Lachnospiraceae	Blautia_A	Blautia_A sp900066145	28.72	HMI	4594075	4330
GCF_003460745_1	Bacteria	Firmicutes_A	Clostridia	Monoglobales_A	UBA1381	CAG-41	CAG-41 sp900066215	26.74	HMI	3247666	3143
GCF_003461245_1	Bacteria	Firmicutes_A	Clostridia	Lachnospirales	Lachnospiraceae	Blautia_A	Blautia_A sp000436615	28.05	HMI	4042273	3846
GCF_003461955_1	Bacteria	Firmicutes_A	Clostridia	Lachnospirales	Lachnospiraceae	Blautia_A	Blautia_A sp900066335	28.1	HMI	3713330	3448
GCF_003463065_1	Bacteria	Firmicutes_A	Clostridia	Lachnospirales	Lachnospiraceae	GCA-900066135	GCA-900066135 sp900066135	28.82	HMI	3728016	3378
GCF_003463205_1	Bacteria	Bacteroidota	Bacteroidia	Bacteroidales	Bacteroidaceae	Bacteroides	Bacteroides sp003463205	25.73	non-HMI	6810738	5230
GCF_003463825_1	Bacteria	Firmicutes_C	Negativicutes	Veillonellales	Veillonellaceae	Veillonella	Veillonella sp003463825	24.31	non-HMI	2006151	2022
GCF_003464165_1	Bacteria	Firmicutes_A	Clostridia	Lachnospirales	Lachnospiraceae	Lachnospira	Lachnospira sp003451515	25.5	non-HMI	2612632	2689
GCF_003471165_1	Bacteria	Firmicutes_A	Clostridia	Lachnospirales	Lachnospiraceae	Blautia_A	Blautia_A sp003471165	28.2	HMI	4072643	3727
GCF_003472155_1	Bacteria	Firmicutes_A	Clostridia	Lachnospirales	Lachnospiraceae	Lachnospira	Lachnospira eligens_B	26.58	HMI	3035795	2945
GCF_003473545_1	Bacteria	Firmicutes_A	Clostridia	Lachnospirales	Lachnospiraceae	Enterocloster	Enterocloster sp000431375	28.45	HMI	3795623	3497
GCF_003474435_1	Bacteria	Firmicutes_A	Clostridia	Lachnospirales	Lachnospiraceae	Blautia_A	Blautia_A sp003474435	27.4	HMI	3676052	3787
GCF_003477525_1	Bacteria	Firmicutes_A	Clostridia	Lachnospirales	Lachnospiraceae	Blautia_A	Blautia_A sp003477525	27.72	HMI	4347292	4291
GCF_003477605_1	Bacteria	Firmicutes_A	Clostridia	Lachnospirales	Lachnospiraceae	Eubacterium_F	Eubacterium_F sp003491505	25.83	non-HMI	3107801	2976
GCF_003477705_1	Bacteria	Firmicutes_A	Clostridia	Lachnospirales	Lachnospiraceae	Dorea	Dorea sp900066555	25.38	non-HMI	2953222	2896
GCF_003478035_1	Bacteria	Firmicutes_A	Clostridia	Lachnospirales	Lachnospiraceae	CAG-81	CAG-81 sp900066785	26.61	HMI	3592556	3447
GCF_003478335_1	Bacteria	Firmicutes_A	Clostridia	Lachnospirales	Lachnospiraceae	TF01-11	TF01-11 sp003529475	24.02	non-HMI	3183099	3097
GCF_003478505_1	Bacteria	Firmicutes_A	Clostridia	Lachnospirales	Lachnospiraceae	UBA9502	UBA9502 sp003478505	26.98	HMI	3575329	3377
GCF_003478765_1	Bacteria	Firmicutes_A	Clostridia	Lachnospirales	Lachnospiraceae	Blautia_A	Blautia_A sp003478765	28.2	HMI	3628655	3429
GCF_003478935_1	Bacteria	Firmicutes_A	Clostridia	Lachnospirales	Lachnospiraceae	KLE1615	KLE1615 sp900066985	25.92	non-HMI	4116467	3941
GCF_003479605_1	Bacteria	Firmicutes_A	Clostridia	Lachnospirales	Lachnospiraceae	CAG-45	CAG-45 sp900066395	25.22	non-HMI	2971866	2856
GCF_003480145_1	Bacteria	Firmicutes_A	Clostridia	Lachnospirales	Lachnospiraceae	Blautia_A	Blautia_A sp900066165	27.63	HMI	4698861	4726
GCF_003480185_1	Bacteria	Firmicutes_A	Clostridia	Lachnospirales	Lachnospiraceae	Blautia_A	Blautia_A sp003480185	28.01	HMI	4589847	4289
GCF_003480315_1	Bacteria	Firmicutes_A	Clostridia	Lachnospirales	Lachnospiraceae	UBA9502	UBA9502 sp003480315	25.71	non-HMI	3217602	3012
GCF_003480435_1	Bacteria	Firmicutes_A	Clostridia	Lachnospirales	Lachnospiraceae	CAG-81	CAG-81 sp900066055	26.11	non-HMI	3382629	3232
GCF_003480725_1	Bacteria	Firmicutes_A	Clostridia	Lachnospirales	Lachnospiraceae	UBA7182	UBA7182 sp003480725	27.17	HMI	3277288	3233
GCF_003481005_1	Bacteria	Firmicutes_A	Clostridia	Lachnospirales	Lachnospiraceae	Eisenbergiella	Eisenbergiella sp900066775	22.28	non-HMI	3523548	3218
GCF_003481335_1	Bacteria	Firmicutes_A	Clostridia	Lachnospirales	Lachnospiraceae	CAG-127	CAG-127 sp900319515	26.1	non-HMI	3308298	3155
GCF_003481535_1	Bacteria	Firmicutes_A	Clostridia	Lachnospirales	Lachnospiraceae	UBA7182	UBA7182 sp003481535	26.33	non-HMI	3566953	3528
GCF_003481565_1	Bacteria	Firmicutes_A	Clostridia	Lachnospirales	Lachnospiraceae	Acetatifactor	Acetatifactor sp900066365	26.12	non-HMI	3720706	3507
GCF_003481705_1	Bacteria	Firmicutes_A	Clostridia	Oscillospirales	Butyricicoccaceae	Agathobaculum	Agathobaculum sp003481705	26.48	HMI	2881618	2833
GCF_003490145_1	Bacteria	Firmicutes_A	Clostridia	Lachnospirales	Lachnospiraceae	CAG-95	CAG-95 sp900066375	22.94	non-HMI	3374459	3225
GCF_003573975_1	Bacteria	Firmicutes_A	Clostridia	Oscillospirales	Oscillospiraceae	Lawsonibacter	Lawsonibacter sp900066825	23.22	non-HMI	3558314	3686
GCF_003584705_1	Bacteria	Firmicutes_A	Clostridia	Lachnospirales	Lachnospiraceae	Acetatifactor	Acetatifactor sp900066565	25.7	non-HMI	4078671	3783
GCF_003697165_2	Bacteria	Proteobacteria	Gammaproteobacteria	Enterobacterales	Enterobacteriaceae	Escherichia	Escherichia coli	29.59	HMI	5034834	4720
GCF_003851945_2	Bacteria	Bacteroidota	Bacteroidia	Bacteroidales	Marinifilaceae	Butyricimonas	Butyricimonas faecihominis	18.78	non-HMI	4752022	4125
GCF_003865035_1	Bacteria	Firmicutes_A	Clostridia	Lachnospirales	Anaerotignaceae	Anaerotignum	Anaerotignum sp000436415	23.45	non-HMI	2520658	2400
GCF_003991565_1	Bacteria	Bacteroidota	Bacteroidia	Bacteroidales	Marinifilaceae	Butyricimonas	Butyricimonas faecalis	18.16	non-HMI	4976422	4284
GCF_004123145_1	Bacteria	Firmicutes_A	Clostridia	Lachnospirales	Lachnospiraceae	Ruminococcus_A	Ruminococcus_A sp000437095	28.71	HMI	3738517	3374
GCF_004134775_1	Bacteria	Firmicutes_A	Clostridia_A	Christensenellales	Borkfalkiaceae	Borkfalkia	Borkfalkia ceftriaxoniphila	21.21	non-HMI	2608799	2270
GCF_004354505_1	Bacteria	Firmicutes	Bacilli	Lactobacillales	Streptococcaceae	Streptococcus	Streptococcus thermophilus	23.85	non-HMI	2074705	2323
GCF_004535825_1	Bacteria	Bacteroidota	Bacteroidia	Bacteroidales	Bacteroidaceae	Prevotella	Prevotella sp000434515	23.92	non-HMI	4105402	3594
GCF_005121165_1	Bacteria	Firmicutes_A	Clostridia	Oscillospirales	Oscillospiraceae	Oscillibacter	Oscillibacter welbionis	23.37	non-HMI	3576111	3740
GCF_005845215_1	Bacteria	Firmicutes_A	Clostridia	Lachnospirales	Lachnospiraceae	Enterocloster	Enterocloster sp005845215	28.39	HMI	6524593	6122
GCF_006337085_1	Bacteria	Proteobacteria	Gammaproteobacteria	Burkholderiales	Burkholderiaceae	Sutterella	Sutterella sp006337085	22.08	non-HMI	2987884	2448
GCF_900104615_1	Bacteria	Firmicutes_A	Clostridia	Oscillospirales	Ruminococcaceae	Phocea	Phocea massiliensis	18.85	non-HMI	2580742	2394
GCF_900106755_1	Bacteria	Bacteroidota	Bacteroidia	Bacteroidales	Bacteroidaceae	Bacteroides	Bacteroides faecis	24.8	non-HMI	5959374	4781
GCF_900107675_1	Bacteria	Bacteroidota	Bacteroidia	Bacteroidales	Rikenellaceae	Alistipes	Alistipes timonensis	20.94	non-HMI	3488964	2721
GCF_900113155_1	Bacteria	Firmicutes_A	Clostridia	Lachnospirales	Lachnospiraceae	Enterocloster	Enterocloster clostridioformis	28.32	HMI	5465751	5312
GCF_900120005_1	Bacteria	Firmicutes	Bacilli	Erysipelotrichales	Erysipelotrichaceae	Holdemania	Holdemania sp900120005	15.97	non-HMI	3680275	3465
GCF_900120195_1	Bacteria	Firmicutes_A	Clostridia	Lachnospirales	Lachnospiraceae	Blautia_A	Blautia_A sp900120195	28.55	HMI	3308911	3112
GCF_900128475_1	Bacteria	Bacteroidota	Bacteroidia	Bacteroidales	Bacteroidaceae	Bacteroides	Bacteroides massiliensis	22.4	non-HMI	3949838	3324
GCF_900129655_1	Bacteria	Bacteroidota	Bacteroidia	Bacteroidales	Bacteroidaceae	Bacteroides	Bacteroides clarus	24.02	non-HMI	3748808	3089
GCF_900130135_1	Bacteria	Bacteroidota	Bacteroidia	Bacteroidales	Bacteroidaceae	Bacteroides	Bacteroides togonis	23.23	non-HMI	3977103	3385
GCF_900142265_1	Bacteria	Firmicutes_A	Clostridia	Lachnospirales	Anaerotignaceae	Anaerotignum	Anaerotignum lactatifermentans	23.2	non-HMI	3546077	3577
GCF_900155425_1	Bacteria	Bacteroidota	Bacteroidia	Bacteroidales	Tannerellaceae	Parabacteroides	Parabacteroides sp900155425	24.98	non-HMI	5015786	4206
GCF_900167555_1	Bacteria	Firmicutes_A	Clostridia	Oscillospirales	Ruminococcaceae	Gemmiger	Gemmiger formicilis	24.82	non-HMI	3241569	2924
GCF_900209925_1	Bacteria	Firmicutes_A	Clostridia	Lachnospirales	Lachnospiraceae	Anaerobutyricum	Anaerobutyricum hallii_A	27.55	HMI	3515670	3142
GCF_900240235_1	Bacteria	Bacteroidota	Bacteroidia	Bacteroidales	Rikenellaceae	Alistipes_A	Alistipes_A sp900240235	23.98	non-HMI	3044690	2522
GCF_900537995_1	Bacteria	Firmicutes_A	Clostridia	Lachnospirales	Lachnospiraceae	Roseburia	Roseburia intestinalis	26.8	HMI	4493348	4121
GCF_900637515_1	Bacteria	Firmicutes_C	Negativicutes	Veillonellales	Veillonellaceae	Veillonella	Veillonella dispar	25.31	non-HMI	2116915	1978

## Sheet: b)Module completeness x genomes
module	GCA_000210075_1	GCA_000210555_1	GCA_000431575_1	GCA_000431795_1	GCA_000432135_1	GCA_000432375_1	GCA_000432435_1	GCA_000432735_1	GCA_000433035_1	GCA_000433635_1	GCA_000434235_1	GCA_000434275_1	GCA_000434635_1	GCA_000434995_1	GCA_000435055_1	GCA_000435175_1	GCA_000435195_1	GCA_000435555_1	GCA_000435655_1	GCA_000435795_1	GCA_000435975_1	GCA_000436335_1	GCA_000436475_1	GCA_000436535_1	GCA_000436755_1	GCA_000436835_1	GCA_000436875_1	GCA_000437595_1	GCA_000437735_1	GCA_000437915_1	GCA_000438155_1	GCA_000438255_1	GCA_000438355_1	GCA_000980495_1	GCA_000980705_1	GCA_001916065_1	GCA_001916775_1	GCA_001916835_1	GCA_001916855_1	GCA_001916965_1	GCA_001917125_1	GCA_002160535_1	GCA_002404795_1	GCA_002437735_1	GCA_002438685_1	GCA_002451755_1	GCA_003149955_1	GCA_003293635_1	GCA_003343965_1
M00001	1	1	1	0.444444	0.888889	1	0.888889	1	0.888889	1	1	0.888889	0.888889	0.888889	0.777778	0.888889	1	0.777778	0.888889	1	0.888889	0.888889	1	1	1	0.888889	0.777778	0.888889	1	0.555556	1	1	0.888889	0.666667	0.888889	1	0.444444	0.888889	0.888889	1	1	1	0.888889	0.888889	0.666667	0.888889	0.777778	1	0.666667
M00002	1	1	1	0.8	0.8	1	0.8	1	1	1	1	0.8	0.8	0.8	0.6	1	1	0.6	0.8	1	0.8	0.8	1	1	1	0.8	0.8	0.8	1	0.6	1	1	1	0.8	0.8	1	0.8	0.8	0.8	1	1	1	0.8	1	0.4	0.8	0.6	1	1
M00003	1	1	0.857143	0.714286	0.714286	0.857143	0.714286	1	0.857143	1	0.857143	0.714286	0.714286	0.714286	0.857143	0.714286	0.857143	0.714286	0.857143	0.857143	0.714286	0.714286	0.857143	0.857143	1	0.714286	0.714286	0.857143	0.857143	0.714286	1	0.714286	0.714286	1	0.857143	0.714286	0.714286	0.714286	0.714286	1	0.714286	1	0.571429	0.857143	0.428571	0.714286	0.857143	1	1
M00004	0.857143	0.714286	0.571429	0.428571	0.571429	0.571429	0.571429	0.571429	0.428571	0.571429	0.714286	0.714286	0.571429	0.571429	0.571429	0.571429	0.571429	0.571429	0.714286	0.714286	0.571429	0.571429	0.714286	0.714286	0.714286	0.571429	0.714286	0.571429	0.714286	0.428571	0.571429	0.571429	0.571429	0.714286	0.571429	0.571429	0.285714	0.428571	0.428571	0.571429	0.571429	0.714286	0.428571	0.571429	0.714286	0.571429	0.571429	0.571429	0.285714
M00005	1	1	1	0	1	1	1	1	1	1	1	1	1	1	1	0	1	1	1	1	1	1	1	1	1	1	1	1	1	1	1	0	0	1	1	0	0	1	1	1	1	1	1	1	1	1	1	1	1
M00006	1	0	0	0	0	0	0	0	0	0	0	0	0	0	0	0	0	0	0	0	0	0	0	0	0	0	0.5	0	0	0	0	0	0	0	0	0	0	0	0	0	0	0	0	0	0	0	0	0	0
M00007	0.75	1	0.75	0.75	0.75	0.75	0.75	0.75	0.5	0.75	1	1	0.75	0.75	0.75	0.75	0.75	0.75	1	1	0.75	0.75	1	1	1	0.75	0.75	0.75	1	0.75	0.75	0.75	0.75	1	0.75	0.75	0.5	0.5	0.5	0.75	0.75	1	0.5	0.75	1	0.75	0.75	0.75	0.5
M00008	0.75	0.25	0	0	0.25	0	0.25	0.5	0	0	0	0	0.25	0.25	0.25	0	0	0	0.5	0.5	0	0.25	0.5	0.5	0	0.25	0	0.25	0.5	0	0.5	0	0	0	0	0	0	0	0	0.5	0	0.5	0	0	0.25	0.25	0	0.25	0
M00009	0.875	0.375	0.25	0	0.5	0.375	0.25	0.625	0	0.5	0.5	0.375	0.25	0.25	0.375	0	0.125	0.375	0.25	0.25	0.25	0.25	0.375	0.375	0.375	0.25	0.5	0.375	0.375	0.375	0.375	0	0	0.625	0.5	0	0	0.125	0.25	0.375	0.125	0.125	0.375	0	0.25	0.25	0.125	0.125	0.375
M00010	0.666667	0.666667	0.666667	0	0.666667	0.333333	0.333333	0.666667	0	0.666667	0	0.666667	0.333333	0.333333	0.333333	0	0	0.666667	0.333333	0.333333	0.333333	0.333333	0.666667	0.666667	0.666667	0.333333	0.666667	0.666667	0.666667	0.333333	0.666667	0	0	0	0.666667	0	0	0.333333	0.333333	0.666667	0	0	0.666667	0	0.333333	0.333333	0.333333	0	0.333333
M00011	1	0.2	0	0	0.4	0.4	0.2	0.6	0	0.4	0.8	0.2	0.2	0.2	0.4	0	0.2	0.2	0.2	0.2	0.2	0.2	0.2	0.2	0.2	0.2	0.4	0.2	0.2	0.4	0.2	0	0	1	0.4	0	0	0	0.2	0.2	0.2	0.2	0.2	0	0.2	0.2	0	0.2	0.4
M00012	0.4	0.2	0.2	0	0.2	0	0.2	0.4	0	0.2	0.2	0.2	0.2	0.2	0	0	0	0.2	0	0	0	0.2	0.2	0.2	0.2	0.2	0.2	0	0.2	0	0.2	0	0	0.2	0.2	0	0	0	0	0.2	0	0	0.2	0	0.2	0.2	0.2	0	0.2
M00013	0	0.2	0.2	0	0	0	0	0	0	0	0	0	0	0	0.2	0	0	0.2	0.2	0.2	0.2	0.2	0	0	0.2	0	0.2	0	0	0.2	0.2	0	0	0	0	0	0	0.2	0	0.2	0	0.2	0	0.2	0	0	0	0.2	0.2
M00014	0.25	0.25	0	0.125	0.125	0.125	0.125	0.25	0	0.125	0.125	0.125	0	0.125	0	0.125	0.125	0.125	0.25	0	0.125	0.25	0.125	0.125	0.125	0.125	0.125	0.25	0.25	0	0.5	0.125	0.125	0	0.25	0	0	0	0	0.25	0.125	0.25	0.125	0	0.25	0.25	0.125	0.125	0.125
M00015	1	1	1	0	1	1	1	1	0	1	0.5	1	1	1	0	0	0.5	1	1	1	0	1	1	1	1	1	1	0.5	1	0	1	0	0	1	1	0	0	0	0	1	0	1	1	1	1	1	1	1	1
M00016	0.666667	0.888889	0.333333	0	0.555556	0.555556	0.777778	0.555556	0.444444	0.888889	0.666667	0.777778	0.666667	0.777778	0.222222	0	0.555556	0.444444	0.777778	0.777778	0	0.777778	0.666667	0.777778	0.666667	0.777778	0.777778	0.888889	0.777778	0.555556	0.777778	0.444444	0.555556	1	0.888889	0.555556	0	0.555556	0	0.888889	0.222222	0.777778	0.333333	0.444444	0.555556	0.555556	0.555556	0.888889	0.555556
M00017	0.857143	1	0.571429	0	0.571429	0.714286	0.714286	0.857143	0.285714	0.714286	0.714286	0.857143	0.714286	0.714286	0.142857	0	0.857143	0.857143	0.857143	0.857143	0.142857	0.714286	0.857143	0.857143	0.571429	0.714286	0.714286	0.857143	0.857143	0.142857	0.857143	0.285714	0.285714	0.571429	0.714286	0.285714	0	0.571429	0.142857	1	0.142857	0.857143	0.428571	0.428571	0.571429	0.428571	0.428571	0.857143	0.714286
M00018	0.8	1	1	0	1	0.8	0.8	0.8	0.8	1	0.4	1	1	0.8	0	0	0.6	1	0.8	0.8	0.2	0.8	1	1	0.8	0.8	1	0.8	0.8	0.2	0.8	0.4	0.4	1	1	0.4	0	0.8	0.2	1	0.2	1	0.8	0.8	0.8	0.8	1	1	0.4
M00019	1	1	0.25	0	0.25	0	1	1	0	1	1	1	0.25	1	0.25	0	0	0	1	1	0	1	1	1	0.75	1	0.5	1	1	0.25	1	0	0	1	1	0	0	0.25	0	1	0	1	0.25	0.25	0.5	0.5	0	1	1
M00020	1	1	1	0	1	0.666667	0.666667	1	0	1	1	1	0.666667	0.666667	0.666667	0	0	1	1	0.333333	0.666667	0.666667	1	1	1	0.666667	1	0.666667	0.666667	0.666667	0.666667	0	0	1	1	0	0	0.666667	0.666667	1	0	1	0.666667	0.666667	0.666667	0.666667	0.666667	0.666667	0.666667
M00021	1	1	1	0	1	1	1	1	0	1	0	1	1	1	0	0.5	0	1	1	0	1	1	1	1	1	1	1	1	1	1	1	0.5	0.5	1	1	0.5	0	0.5	0.5	1	1	1	1	0	0.5	1	1	1	1
M00022	0.75	1	1	0.25	1	1	1	0.75	1	1	0.75	1	0.75	1	0.75	0	1	1	1	0.75	1	1	1	1	0.75	1	0.75	1	1	0.75	1	0	0	1	1	0	0	1	1	1	0	1	0.75	0	1	1	1	1	1
M00023	1	0.333333	0	0	0	0	0	1	0	1	0	1	0	1	0	0	0	0	0	0	0	1	0.666667	0.666667	0.666667	1	0	0	1	0	0	0	0	0	1	0	0	0	0	1	0	0	0	0	0	0	0	0	1
M00024	0.5	0.5	0	0	0.5	0.5	0.5	0.5	0.5	0.5	0.5	0.5	0.5	0.5	0	0	0.5	0	0.5	0.5	0	0.5	0.5	0.5	0.5	0.5	0.5	0.5	0.5	0	0.5	0	0	1	0	0	0	0.5	0	0.5	0	0.5	0.5	0	0.5	0.5	0.5	0.5	0.5
M00025	0	0.5	0	0	0.5	0.5	0.5	0	0.5	0.5	0.5	0.5	0.5	0.5	0	0	0	0	0.5	0.5	0	0.5	0.5	0.5	0.5	0.5	0.5	0.5	0.5	0	0.5	0	0	1	0.5	0	0	0.5	0	0.5	0	0.5	0.5	0	0.5	0.5	0.5	0.5	0.5
M00026	1	1	0	0	0	0	1	1	0	0.666667	0	1	0	1	0	0	0	0	0	0	0	0.833333	0.833333	0.833333	1	1	1	1	1	0	1	0	0	1	0.666667	0	0	0	0	1	0	0.166667	0	0	0	0	0	0.833333	1
M00027	0.333333	0	0	0	0	0	0	0	0	0	0.333333	0	0	0	0	0	0	0	0	0	0	0	0	0	0	0	0	0	0	0	0	0	0	0	0	0	0	0	0	0	0	0	0	0	0	0	0	0	0
M00028	0.75	1	0	0	1	1	1	0.25	0	1	0.5	1	0	1	0	0	0	0	1	0	0	1	1	1	1	1	1	1	1	0	1	0	0	1	1	0	0	0	0	1	0	0.25	0.75	1	0.75	0.75	0	1	0
M00029	0.4	0.8	0.4	0.2	0.6	0.6	0.6	0.4	0	0.6	0.4	0.6	0.6	0.6	0.2	0	0.2	0	0.6	0.4	0.2	0.6	0.6	0.6	0.6	0.6	0.6	0.6	0.6	0	0.6	0	0.2	0.6	0.6	0	0.2	0.2	0.2	0.6	0	0.4	0.6	0.2	0.4	0.6	0.2	0.6	0.2
M00030	0.25	0.125	0	0	0	0	0	0.25	0	0.125	0.125	0.125	0	0	0	0	0.125	0	0.125	0.125	0	0	0.125	0.125	0	0	0.125	0	0.125	0	0	0	0	0	0.125	0	0	0	0	0.125	0	0.125	0	0	0	0	0	0.125	0
M00031	0	0	0	0	0	0	0	0	0	0	0	0	0.166667	0	0	0	0	0.166667	0	0	0	0	0	0	0	0	0	0	0	0	0	0	0	0	0	0	0	0	0	0	0	0	0.166667	0.166667	0	0	0	0	0
M00033	0.4	0.6	0.4	0	0.4	0.4	0.4	0.4	0.2	0.4	0.2	0.4	0.4	0.4	0	0	0.4	0.4	0.4	0.4	0	0.4	0.4	0.4	0.2	0.4	0.4	0.4	0.4	0.2	0.4	0.4	0.4	0.4	0.4	0.4	0	0.4	0	0.4	0.2	0.4	0.2	0.4	0.4	0.4	0.4	0.4	0.4
M00034	0.125	0.375	0.125	0.125	0.25	0.125	0.25	0.125	0.125	0.375	0.125	0.25	0.125	0.25	0.125	0.125	0.375	0.25	0.375	0.25	0.125	0.25	0.375	0.375	0.125	0.25	0.375	0.125	0.25	0.125	0.375	0.125	0.125	0.5	0.375	0.125	0	0.25	0.125	0.375	0.125	0.375	0.25	0.125	0.25	0.25	0.125	0.25	0.125
M00035	0.5	0.5	0.25	0.25	0.25	0.5	0.5	0.25	0.25	0.25	0.5	0.25	0.25	0.25	0.5	0.25	0.25	0.25	0.5	0.25	0.25	0.25	0.25	0.25	0.5	0.5	0.25	0.5	0.5	0.25	0.25	0.5	0.25	0.25	0.5	0.25	0.25	0.25	0.5	0.5	0.5	0.25	0.25	0.25	0.5	0.5	0.25	0.5	0.25
M00036	0.333333	0.333333	0.166667	0	0.166667	0.166667	0.166667	0.333333	0	0.166667	0.333333	0.166667	0.166667	0.166667	0.333333	0	0	0.166667	0.333333	0.333333	0.166667	0.166667	0.166667	0.166667	0.333333	0.166667	0.5	0.166667	0.166667	0.333333	0.333333	0	0	0.166667	0.166667	0	0	0.333333	0	0.333333	0	0.333333	0.166667	0.166667	0.166667	0.166667	0.166667	0.333333	0.333333
M00037	0	0	0	0	0	0	0	0	0	0	0	0	0	0	0	0	0.25	0	0	0	0	0	0	0	0	0	0	0	0	0	0	0	0	0	0	0	0	0	0	0	0	0	0	0	0	0	0	0	0
M00038	0	0	0.142857	0	0	0	0.142857	0	0	0	0.142857	0	0	0	0	0	0	0.142857	0	0.142857	0.142857	0	0.142857	0.142857	0	0	0.142857	0	0	0.142857	0	0	0	0.142857	0	0	0	0	0.142857	0	0	0	0	0.142857	0.142857	0.142857	0.142857	0	0
M00039	0.1	0.1	0	0.1	0	0	0	0.1	0.1	0	0.1	0.1	0	0	0	0.1	0	0	0.1	0.1	0	0	0.1	0.1	0.1	0	0	0	0.1	0	0.1	0.1	0.1	0	0	0.1	0.1	0	0	0.1	0	0.1	0	0	0	0	0	0	0.1
M00040	0	0.333333	0	0	0.333333	0.333333	0.333333	0	0	0.333333	0	0.333333	0.333333	0.333333	0	0	0	0	0.333333	0.333333	0	0.333333	0.333333	0.333333	0.333333	0.333333	0.333333	0	0.333333	0	0.333333	0	0	0.666667	0	0	0	0.333333	0	0.333333	0.333333	0.333333	0.333333	0	0.333333	0.333333	0.333333	0	0.333333
M00042	0	0	0	0	0	0	0	0	0	0	0	0	0	0	0	0	0.25	0	0	0	0	0	0	0	0	0	0	0	0	0	0	0	0	0	0	0	0	0	0	0	0	0	0	0	0	0	0	0	0
M00044	0	0	0	0	0	0	0	0	0	0	0	0	0	0	0	0	0	0	0	0	0	0	0	0	0	0	0	0	0	0	0	0	0	0.2	0	0	0	0	0	0	0	0	0	0	0	0	0	0	0
M00045	1	0	0	0	1	0	0	0	0	0	1	0	0	0	1	0	0.5	0	1	1	1	0	0	0	0	0	0	0	0	0.25	0	0	0	0.25	0	0	0	0	1	0	0	1	0	1	0	0	0	0	0
M00046	0	0.333333	0.333333	0	0.333333	0	0	0	0	0	0	0	0	0	0	0	0	0.333333	0	0	0.333333	0	0	0	0	0	0.333333	0	0	0	0	0	0	0.333333	0.666667	0	0	0.333333	0.333333	0	0	0	0.333333	0.333333	0	0	0	0	0
M00048	1	1	0.125	0	0.125	0.25	1	1	0.125	1	1	1	1	1	1	0	0.875	0.125	1	0.875	0.125	1	0.875	1	1	1	1	1	1	1	1	0	0	1	0.25	0	0	0.875	0.125	1	0	1	0.125	0.125	1	1	0	1	0.875
M00049	1	1	1	0.25	1	1	1	1	1	1	1	1	1	1	0.75	0.75	1	0.75	1	1	1	1	1	0.75	1	1	1	1	1	0.75	1	0.5	0.5	1	0.75	0.5	0.25	0.5	1	1	0.5	1	0.75	1	0.75	0.75	0.25	1	1
M00050	1	1	0.75	0.25	0.75	1	1	1	1	1	1	1	1	1	0.75	0.5	1	0.5	1	1	0.75	1	1	1	1	1	1	1	1	0.75	1	0.5	0.5	1	0.75	1	0.25	1	0.75	0.75	0.5	1	0.75	0.75	0.75	1	0.5	1	1
M00051	0.666667	1	0.666667	0	0	1	0.666667	1	0.666667	0.666667	0.666667	1	0.666667	1	0.666667	0	0.666667	0	1	0.666667	0	1	0.666667	0.666667	1	1	1	1	1	0.666667	1	0	0	0.666667	0	0	0	1	0	1	0	1	0	0	0.666667	0.666667	0	1	0.666667
M00052	1	0.666667	0.666667	0	0.666667	0.666667	0.666667	1	0.666667	0.666667	0.666667	0.666667	0.666667	0.666667	0.666667	0.666667	0.333333	0.666667	0.666667	0.666667	0.666667	0.666667	0.666667	0.666667	0.666667	0.666667	0.666667	0.666667	0.666667	0.666667	0.666667	0.666667	0.666667	1	0.666667	0.666667	0	0.666667	0.666667	0.666667	1	0.666667	0.666667	0.333333	0.666667	0.333333	0.333333	0.666667	0.333333
M00053	0.625	0.5	0.5	0.5	0.375	0.5	0.375	0.625	0.5	0.25	0.375	0.375	0.5	0.5	0.25	0.375	0.375	0.5	0.25	0.25	0.5	0.375	0.25	0.25	0.375	0.5	0.5	0.375	0.25	0.5	0.25	0.375	0.5	0.875	0.5	0.25	0.5	0.375	0.5	0.25	0.875	0.25	0.375	0.375	0.5	0.5	0.375	0.625	0.5
M00055	0	0	0	0	0	0	0	0	0	0	0	0	0	0	0	0	0	0	0	0	0	0	0	0	0	0	0	0	0	0	0	0	0	0	0	0	0	0	0	0	0	0	0	0	0	0	0	0	0
M00056	0	0	0	0	0	0	0	0	0	0	0	0	0	0	0	0	0	0	0	0	0	0	0	0	0	0	0	0	0	0	0	0	0	0	0	0	0	0	0	0	0	0	0	0	0	0	0	0	0
M00059	0	0	0	0	0	0	0	0	0	0	0	0	0	0	0	0	0	0	0	0	0	0	0	0	0	0	0	0	0	0	0	0.2	0	0	0	0	0	0	0	0	0	0	0	0	0	0	0	0	0
M00060	0.777778	0	0	0	0	0	0	0.777778	0	0	0.777778	0	0	0	0	0	0	0	0	0	0	0	0	0	0	0	0	0	0	0	0	0	0	0.888889	0	0	0	0	0	0	0.777778	0	0	0	0	0	0	0	0
M00061	0.8	0	0.2	0	0.4	0	0.8	0.8	0	0	0	0	0.4	0.8	0.2	0	0	0	0.4	0.8	0	0.8	1	1	0	0.8	0.2	1	1	0	0.8	0	0	0	0	0	0	0	0	1	0	0.4	0	0.2	0.8	0.6	0	0.8	0
M00063	1	0	0	0	0	0	0	1	0	0	1	0	0	0	0	0	0	0	0.25	0	0	0	0	0	0	0	0	0	0	0	0	0	0	1	0	0	0	0	0	0	0.75	0.25	0	0	0	0	0	0	0
M00064	0.2	0	0	0	0	0	0	0	0	0	0	0	0	0	0	0	0	0	0.4	0.4	0	0	0	0	0.4	0	0	0	0	0	0.2	0	0	1	0	0	0.8	0	0	0	0.4	0.4	0	0	0.2	0.2	0.2	0.4	0
M00065	0	0	0	0	0	0	0	0	0	0	0	0	0	0	0	0	0	0	0	0	0	0	0	0	0	0	0	0	0	0	0	0	0	0	0	0	0	0	0	0	0	0	0	0	0	0	0	0	0
M00066	0	0	0	0	0	0	0	0	0	0	0	0	0	0	0	0	0	0	0	0	0	0	0	0	0	0	0	0	0	0	0	0	0	0	0	0	0	0	0	0	0	0	0	0	0	0	0	0	0
M00075	0	0	0	0	0	0	0	0	0	0	0	0	0	0	0	0	0	0	0	0	0	0	0	0	0	0	0	0	0	0	0.111111	0	0	0	0	0	0	0	0	0.111111	0	0	0	0	0	0	0	0	0
M00076	0.333333	0	0	0	0	0	0	0.166667	0	0	0	0	0	0	0	0	0	0	0	0	0	0	0.166667	0.166667	0	0	0	0.166667	0.166667	0	0	0	0	0	0	0	0	0	0	0.166667	0	0	0	0	0	0	0	0	0
M00077	0.5	0	0	0	0	0	0	0.25	0	0	0	0	0	0	0	0	0	0	0	0	0	0	0.25	0.25	0	0	0	0.25	0.25	0	0	0	0	0	0	0	0	0	0	0.25	0	0	0	0	0	0	0	0	0
M00078	0.444444	0	0	0	0	0	0	0.111111	0	0	0	0	0	0	0	0	0	0	0	0	0	0	0.111111	0.111111	0	0	0	0.111111	0.111111	0	0	0	0	0	0	0	0	0	0	0.111111	0	0	0	0	0.111111	0.111111	0	0	0
M00079	0.2	0	0	0	0.2	0.2	0.2	0.2	0.2	0	0.2	0	0	0.2	0	0	0	0	0	0	0.2	0.2	0	0	0	0.2	0	0	0	0	0	0	0	0	0	0	0	0	0	0.2	0	0	0	0	0.2	0	0	0	0
M00081	0.333333	0	0	0	0	0	0	0.333333	0	0	0	0	0	0	0	0	0	0	0	0	0	0	0.333333	0.333333	0	0	0	0.333333	0.333333	0	0	0	0	0	0	0	0	0	0	0.333333	0	0	0	0	0	0	0	0.333333	0
M00082	0.5	0.5	0	0	0	0	0	0.5	0	1	0.5	0	0	0	0	0.5	1	0	1	1	0	0	0.5	1	1	0	1	0	1	0	0	1	1	1	1	1	0	0	0	0.5	1	1	0	0	0	0	0	0.5	0
M00083	1	1	0	0	0	0	0	1	0	1	1	1	0	0	0	1	1	0	1	0	0	0	1	1	1	0	1	0	1	0	0	1	1	1	1	1	0	0	0	1	1	1	0	0	0	0	0	1	1
M00086	1	0	0	0	1	0	0	1	0	0	1	1	1	1	1	1	0	0	0	0	0	1	0	0	1	0	0	0	0	0	0	1	1	1	0	1	0	0	0	0	0	0	1	0	1	1	0	1	1
M00087	0.333333	0.666667	0.333333	0	0	0.333333	0	0.333333	0	0	0.333333	0	0	0	0.666667	0	0	0.333333	0.666667	0.333333	0.333333	0	0	0	0.333333	0	0.333333	0	0	0.333333	0.333333	0	0	0	0	0	0	0.333333	0	0.333333	0	0.333333	0	0.333333	0	0	0	0.333333	0.333333
M00088	0	0.4	0.2	0	0	0	0	0	0	0	0	0	0	0	0	0	0	0.2	0.2	0.2	0.2	0	0	0	0.2	0	0.4	0	0	0.2	0.2	0	0	0	0	0	0	0.2	0.2	0.2	0	0.2	0	0.2	0	0	0.2	0.2	0.2
M00089	0.25	0.25	0.25	0	0.25	0.25	0.25	0.25	0.25	0.25	0.25	0.25	0.25	0.25	0.25	0.25	0.25	0.25	0.25	0.25	0.25	0.25	0.25	0.25	0.25	0.25	0.25	0.25	0.25	0.25	0.25	0.25	0.25	0.25	0.25	0.25	0	0.25	0.25	0.25	0.25	0.25	0.25	0	0.25	0.25	0.25	0.25	0.25
M00091	0	1	0	0	1	1	0	0	0	0	0	0	0	0	0	0	0	0	0	0	0	0	0	0	0	0	0	1	0	0	0	0	0	0	0	0	0	0	0	0	0	0	1	0	0	0	0	0	0
M00093	1	0.333333	0.333333	0.333333	0.333333	0.333333	0.333333	1	0.333333	0.333333	1	1	0.333333	0.333333	0.333333	0.333333	0.333333	0.333333	0.333333	0.333333	0.333333	0.333333	1	1	1	0.333333	0.333333	0.333333	0.333333	0.333333	0.333333	0.333333	0.333333	1	0.333333	0.333333	0.333333	0.333333	0.666667	0.333333	1	0.333333	0.333333	0.666667	0.333333	0.333333	0.333333	0.333333	0.333333
M00094	0	0	0	0	0	0	0	0	0	0	0	0	0	0	0	0	0	0	0	0	0	0	0	0	0	0	0	0	0	0	0	0	0	0	0	0	0	0	0	0	0	0	0	0	0	0	0	0	0
M00095	0.142857	0.285714	0.142857	0.142857	0	0	0	0.142857	0	0	0.142857	0.142857	0	0	0	0.142857	0.142857	0.142857	0.142857	0.285714	0.142857	0.142857	0.142857	0.142857	0.285714	0	0.285714	0	0.142857	0.142857	0.285714	0.142857	0	0	0	0	0.142857	0.285714	0.142857	0.285714	0.142857	0.142857	0	0.142857	0	0	0	0.142857	0.285714
M00096	0.875	1	0.875	0.125	0.875	0.875	0.875	1	0.875	0.875	1	1	0.75	0.875	0.875	0.125	0.875	0.75	0.875	0.875	0.875	1	1	1	0.875	0.875	1	0.875	1	0.875	1	0.375	0.375	0.875	0.875	0.375	0.125	1	0.875	1	0.5	0.875	0.75	0.75	0.625	0.75	0.875	0.875	1
M00097	0	0	0	0	0	0	0	0	0	0	0	0	0	0	0	0	0	0	0	0	0	0	0	0	0	0	0	0	0	0	0	0	0	0	0	0	0	0	0	0	0.166667	0	0	0	0	0	0	0	0
M00098	0	0.5	0.5	0	0.5	0.5	0.5	0	0	0	0	0.5	0.5	0.5	0.5	0	0.5	0.5	0.5	1	0.5	0	0.5	0.5	0	0.5	0.5	0	0.5	0.5	0.5	0	0	0.5	1	0	0	0.5	0	0.5	0	0.5	0.5	0.5	1	1	0	0.5	0.5
M00099	0	0	0	0	0	0	0	0	0	0	0	0	0	0	0	0	0	0	0	0	0	0	0	0	0	0	0	0	0	0	0	0	0	0	0	0	0	0	0	0	0	0	0	0	0	0	0	0	0
M00104	0	0	0	0	0	0	0	0	0	0	0	0	0	0	0	0	0	0	0	0	0	0	0	0	0	0	0	0	0	0	0	0	0	0	0	0	0	0	0	0	0	0	0	0	0	0	0	0	0
M00112	0	0	0	0	0	0	0	0	0	0	0	0	0	0	0	0	0	0	0	0	0	0	0	0	0	0	0	0	0	0	0	0	0	0	0	0	0	0	0	0	0	0	0	0	0	0	0	0	0
M00114	0.25	0	0.125	0	0	0	0.125	0.125	0	0.125	0.125	0	0.125	0.125	0	0	0	0	0	0	0	0.125	0.125	0.125	0	0.125	0	0.125	0.125	0	0.125	0	0	0	0.125	0	0	0	0	0.125	0	0	0	0.125	0.125	0.125	0	0.125	0
M00115	1	1	0.2	0	0.4	0.4	1	1	0.6	1	1	1	0.4	1	0.4	0.2	0	0.2	1	0.4	0.2	1	1	1	1	1	0.4	0.4	1	0.4	0.4	0	0	0.6	0.8	0	0	0.2	0.2	0.4	0.2	0.4	0.4	0.2	0.4	0.4	0.4	0.6	1
M00116	0.777778	0	0	0	0	0	0	0.777778	0	0	0.222222	0	0	0	0	0	0	0	0	0	0	0	0	0	0	0	0	0	0	0	0	0	0	0.555556	0	0	0	0	0	0	0	0.111111	0	0	0	0	0	0	0
M00117	0.111111	0	0	0	0	0	0	0.111111	0	0	0.111111	0	0	0	0	0	0	0	0	0	0	0	0	0	0	0	0	0	0	0	0	0	0	0.111111	0	0	0	0	0	0	0	0	0	0	0	0	0	0	0
M00118	0	0	0	0	0	0	0	0	0	0	0	0	0	0	0	0	0	0	0	0	0	0	0	0	0	0	0	0	0	0	0	0	0	0	0	0	0	0	0	0	0	0	0	0	0	0	0	0	0
M00119	1	0.4	0	0	0.4	0.2	0.4	1	0	0.2	0.8	0.8	0.2	0.2	0.2	0	0	0	0.2	0.4	0.2	0.2	0.4	0.4	0.8	0.2	0.4	0.4	1	0.2	0.2	0	0	1	0.2	0	0	0.2	0	0.4	0	0.4	0.4	0	0.4	0.4	0	0.4	0.8
M00120	1	0.666667	0.666667	0	0.666667	0.666667	0.666667	1	0.666667	1	1	0.666667	1	0.666667	0.666667	0.333333	1	0.666667	0.666667	1	0.666667	0.666667	1	1	1	0.666667	0.666667	1	1	1	0.666667	0	0	1	0	0	0	0.666667	0.666667	0.666667	0.333333	1	0.333333	0.333333	0.666667	0.666667	0.333333	1	0.333333
M00121	0.5	0.7	0.2	0.2	0.3	0.3	0.4	0.3	0.2	0.7	0.4	0.7	0.3	0.3	0.2	0.2	0.2	0.2	0.4	0.4	0.2	0.3	0.1	0.2	0.7	0.3	0.2	0.2	0.7	0.2	0.2	0.2	0.2	1	0.7	0.2	0.2	0.2	0.2	0.2	0.2	0.4	0.2	0.2	0.3	0.2	0.1	0.2	0.2
M00122	0.142857	1	0.571429	0	0.857143	0	0.285714	0.142857	0	1	0.142857	0.857143	0.857143	0.285714	0.571429	0	0.285714	0.714286	0.714286	0.857143	0.571429	0.285714	0.857143	0	0.142857	0.285714	0	0.714286	0.857143	0.142857	0.857143	0	0	0	1	0	0	0	0.571429	1	0	1	0.857143	0	0.142857	0.142857	0.285714	1	0.142857
M00123	1	0.333333	0.333333	0	0.333333	0	0	1	0	0.333333	0	0.666667	0	0	0.666667	0	0	0.333333	0.666667	0.333333	0.333333	0	0.333333	0.333333	0.333333	0	0	0	0.333333	0.666667	0	0	0	0.333333	0.333333	0	0	0	0.333333	0.333333	0.333333	0.666667	0.333333	0	0	0	0	0	0
M00124	0.833333	0.166667	0.166667	0	0.166667	0.166667	0.166667	0.666667	0	0.166667	0.5	0.166667	0.166667	0.166667	0.166667	0	0	0.166667	0.166667	0	0.166667	0.166667	0.166667	0.166667	0.166667	0.166667	0.166667	0.166667	0.166667	0.166667	0.166667	0	0	0.166667	0.166667	0	0	0.166667	0.166667	0.166667	0	0.333333	0	0.166667	0.166667	0.166667	0.166667	0.166667	0.166667
M00125	1	1	0.142857	0	0.285714	0.285714	0.285714	1	0.285714	1	0.857143	1	0.285714	0.285714	0.285714	0.142857	0.142857	0.142857	1	0.285714	0.142857	0.285714	1	1	1	0.285714	0.857143	0.285714	1	0.142857	0.285714	0.142857	0.142857	0.714286	1	0.142857	0	0.142857	0.285714	0.285714	0	0.285714	0.285714	0.285714	0.285714	0.142857	0.142857	1	1
M00126	1	0.8	0.4	0.2	0.6	0.4	0.6	1	0.8	0.4	1	0.8	0.4	0.8	0.2	0.2	0.4	0.6	0.4	0.6	0.6	0.8	0.6	0.6	0.8	0.8	0.4	0.6	0.8	0.2	0.8	0.2	0.2	0.8	0.4	0.2	0.2	0.4	0.6	0.6	0.2	0.6	0.4	0.4	0.8	1	0.4	0.6	0.6
M00127	0.714286	0.571429	0.142857	0.142857	0.142857	0.285714	0.428571	0.714286	0.142857	0.714286	0.571429	0.714286	0.142857	0.142857	0.285714	0	0.428571	0.142857	0.428571	0.428571	0.285714	0.142857	0.714286	0.714286	0.714286	0.142857	0.285714	0.142857	0.714286	0.285714	0.142857	0	0	0.285714	0.714286	0	0.142857	0.285714	0.142857	0.142857	0.142857	0.571429	0	0	0	0.142857	0.142857	0.428571	0.571429
M00129	0.285714	0.142857	0	0.142857	0	0	0.142857	0.142857	0.142857	0	0.142857	0	0	0.142857	0	0.142857	0.142857	0	0.142857	0	0.142857	0.285714	0.142857	0.142857	0	0.142857	0	0.285714	0.285714	0.142857	0.285714	0.142857	0.142857	0.142857	0.142857	0	0	0	0	0.285714	0.142857	0.142857	0	0	0.285714	0.285714	0.142857	0.285714	0
M00131	0.25	0.25	0.25	0	0	0	0	0.25	0	0	0.25	0	0	0	0	0	0	0	0	0	0.25	0.25	0	0	0	0	0	0.25	0	0	0	0	0	0.25	0	0	0	0	0	0	0.25	0.25	0	0	0	0	0	0	0
M00133	0.25	0.5	0.25	0	0	0	0.25	0.25	0.25	0.75	0.25	0.5	0	0.25	0.25	0	1	0.25	1	0.5	0	0.25	0.5	0.5	0.5	0.25	0.75	0	0.75	0	0.25	0	0	0.25	0.75	0	0	0	0	1	0.25	1	0	0	0.25	0.25	0.25	0.75	0.25
M00134	0	0.5	0	0	0	0	0	0	0	0	0	0	0	0	0	0	0.5	0	0	0	0	0	0	0	0	0	0	0	0	0	0	0	0.5	0	0	0	0	0	0	0	0	0	0	0	0	0	0	0	0
M00135	0	0.25	0.25	0	0	0.25	0	0	0.25	0	0	0	0	0	0.25	0	0.25	0	0	0	0.25	0	0.25	0	0.25	0	0	0.25	0	0	0	0.25	0	0.25	0	0	0	0	0	0	0	0.25	0.25	0	0.25	0	0	0	0
M00136	0	0	0	0	0	0	0	0	0	0	0	0	0	0	0	0	0	0	0	0	0	0	0	0	0	0	0	0	0	0	0	0	0	0	0	0	0	0	0	0	0	0	0	0	0	0	0	0	0
M00137	0	0	0	0	0	0	0	0	0	0	0	0	0	0	0	0	0	0	0	0	0	0	0	0	0	0	0	0	0	0	0	0	0	0	0	0	0	0	0	0	0	0	0	0	0	0	0	0	0
M00140	1	1	1	0.333333	1	0.666667	1	1	1	1	0.666667	1	0.666667	1	0.666667	0.666667	1	1	0.666667	0.666667	1	1	1	1	1	1	1	1	1	1	1	0.666667	0.666667	1	1	0.666667	0.666667	0.666667	0.666667	1	0.666667	0.666667	0.666667	1	0.666667	1	1	1	1
M00141	0.5	0.5	0.5	0	0.5	0.5	0.5	0.5	0.5	0.5	0.5	0.5	0	0.5	0.5	0	0.5	0.5	0	0.5	0.5	0.5	0.5	0.5	0.5	0.5	0.5	0.5	0.5	0.5	0.5	0	0	0.5	0.5	0	0.5	0.5	0.5	0.5	0.5	0	0.5	0.5	0	0.5	0.5	0.5	0.5
M00144	0	0	0	0	0	0	0	0	0	0	0	0	0	0	0	0	0	0	0	0	0	0	0	0	0	0	0	0	0	0	0	0	0	0	0	0	0	0	0	0	0	0	0	0	0	0	0	0	0
M00149	0	0	0	0	0	0	0	0	0	0	0	0	0	0	0	0	0	0	0	0	0	0	0	0	0	0	0	0	0	0	0	0	0	0	0	0	0	0	0	0	0	0	0	0	0	0	0	0	0
M00150	0	0	0	0	0	0	0	0	0	0	0	0	0	0	0	0	0	0	0	0	0	0	0	0	0	0	0	0	0	0	0	0	0	0	0	0	0	0	0	0	0	0	0	0	0	0	0	0	0
M00151	0	0	0	0	0	0	0	0	0	0	0	0	0	0	0	0	0	0	0	0	0	0	0	0	0	0	0	0	0	0	0	0	0	0	0	0	0	0	0	0	0	0	0	0	0	0	0	0	0
M00153	0	0	0	0	0	0	0	0	0	0	0	0	0	0	0	0	0	0	0	0	0	0	0	0	0	0	0	0	0	0	0	0	0	0	0	0	0	0	0	0	0	0	0	0	0	0	0	0	0
M00157	1	1	0	0	0	1	0	1	1	1	0	1	1	1	1	0	0	0	1	1	0	1	1	1	1	1	1	0	1	0	1	0	0	1	1	0	0	0	0	1	0	1	0	0	0	0	0	1	1
M00159	0	0	0	0	0	1	0	0	0	0	0	0	0	0	0	0	1	0	0	0	0	0	0	0	0	0	0	0	0	0	0	0	0	0	0	0	0	0	0	0	0	1	0	0	0	0	0	0	0
M00165	0.454545	0.636364	0.636364	0.454545	0.636364	0.636364	0.636364	0.636364	0.636364	0.636364	0.636364	0.454545	0.636364	0.636364	0.636364	0.636364	0.636364	0.636364	0.636364	0.636364	0.636364	0.636364	0.636364	0.636364	0.636364	0.636364	0.636364	0.636364	0.636364	0.636364	0.636364	0.636364	0.636364	0.727273	0.636364	0.636364	0.454545	0.454545	0.545455	0.636364	0.636364	0.636364	0.545455	0.636364	0.545455	0.636364	0.636364	0.636364	0.545455
M00166	0.5	0.5	0.5	0.5	0.5	0.5	0.5	0.5	0.5	0.5	0.5	0	0.5	0.5	0.5	0.5	0.5	0.5	0.5	0.5	0.5	0.5	0.5	0.5	0.5	0.5	0.5	0.5	0.5	0.5	0.5	0.5	0.5	0.5	0.5	0.5	0.5	0.5	0.5	0.5	0.5	0.5	0.5	0.5	0.25	0.5	0.5	0.5	0.5
M00167	0.428571	0.714286	0.714286	0.428571	0.714286	0.714286	0.714286	0.714286	0.714286	0.714286	0.714286	0.714286	0.714286	0.714286	0.714286	0.714286	0.714286	0.714286	0.714286	0.714286	0.714286	0.714286	0.714286	0.714286	0.714286	0.714286	0.714286	0.714286	0.714286	0.714286	0.714286	0.714286	0.714286	0.857143	0.714286	0.714286	0.428571	0.428571	0.571429	0.714286	0.714286	0.714286	0.571429	0.714286	0.714286	0.714286	0.714286	0.714286	0.571429
M00168	0.5	0	0	0	0	0	0	0.5	0	0	0.5	0	0	0	0	0	0	0	0	0	0	0	0	0	0	0	0	0	0	0	0	0	0	0.5	0	0	0	0	0	0	0	0	0	0	0	0	0	0	0
M00169	1	0.5	0.5	0.5	0.5	0.5	0.5	1	0.5	0.5	0.5	0.5	0.5	0.5	0.5	0	1	0.5	0.5	0.5	0.5	0.5	0.5	0.5	0.5	0.5	0.5	0.5	0.5	0.5	0.5	0	0.5	0.5	0.5	0	0.5	0.5	0.5	0.5	0.5	0.5	0.5	0	0	0.5	0.5	0.5	0.5
M00170	0.25	0.25	0.25	0	0.25	0	0	0.25	0.25	0	0.25	0.25	0.25	0	0.25	0	0	0.25	0.25	0	0.25	0	0.25	0.25	0.25	0	0.25	0.25	0.25	0	0.25	0	0	0.25	0	0	0	0.25	0.25	0.25	0	0.25	0	0	0	0	0	0.25	0.25
M00171	0.142857	0.142857	0.142857	0.142857	0.142857	0.142857	0.142857	0.142857	0.142857	0.142857	0.142857	0.142857	0.142857	0.142857	0.142857	0	0.142857	0.142857	0.142857	0.142857	0.142857	0.142857	0.142857	0.142857	0.142857	0.142857	0.142857	0.142857	0.142857	0.142857	0.142857	0	0.142857	0	0.142857	0	0.142857	0.142857	0.142857	0.142857	0.142857	0.142857	0.142857	0	0	0.142857	0.142857	0.142857	0.142857
M00172	0.5	0.25	0.25	0.25	0.25	0.25	0.25	0.5	0.25	0.25	0.25	0.25	0.25	0.25	0.25	0	0.5	0.25	0.25	0.25	0.25	0.25	0.25	0.25	0.25	0.25	0.25	0.25	0.25	0.25	0.25	0	0.25	0.25	0.25	0	0.25	0.25	0.25	0.25	0.25	0.25	0.25	0	0	0.25	0.25	0.25	0.25
M00173	0.7	0.4	0.3	0.1	0.4	0.4	0.2	0.5	0.1	0.3	0.5	0.2	0.2	0.2	0.4	0.1	0.2	0.3	0.2	0.3	0.3	0.2	0.3	0.3	0.3	0.2	0.5	0.3	0.3	0.4	0.2	0.1	0.1	0.4	0.3	0.1	0.1	0.1	0.3	0.3	0.2	0.2	0.2	0	0.2	0.2	0	0.2	0.4
M00175	0	0	0	0	0	0	0	0	0	0	0	0	0	0	0	0	0	0	0	0	0	0	0	0	0	0	0	0	0	0	0	0	0	0	0	0	0	0	0	0	0	0	0	0	0	0	0	0	0
M00176	0	0	0	0	0	0	0	0	0	0	0	0	0	0	0	0	0	0	0	0	0	0	0	0	0.333333	0	0	0	0	0	0	0	0	0	0	0	0	0	0	0	0	0	0	0	0	0	0	0	0
M00307	1	1	1	1	1	1	1	1	1	0	1	0	1	1	1	1	1	1	1	1	1	1	1	1	1	1	1	1	1	1	0	1	1	0	0	1	1	1	1	1	1	1	0	0	1	1	0	1	1
M00308	0.75	0.25	0.25	0.25	0.75	0.25	0.75	0.75	0.25	0.25	0.25	0	0.75	0.75	0.5	0.25	0.25	0.25	0.75	0.75	0.25	0.75	0.75	0.75	0.25	0.75	0.25	0.75	0.75	0.25	0.75	0.25	0.25	0.25	0.25	0.25	0.25	0.25	0.25	0.75	0.25	0.75	0.25	0.25	0.5	0.75	0.25	0.75	0.25
M00309	0	0	0	0	0	0	0	0	0	0	0	0	0	0	0	0	0	0	0	0	0	0	0	0	0	0	0	0	0	0	0	0	0	0.333333	0	0	0	0	0	0	0	0	0	0	0	0	0	0.333333	0
M00338	0	0	0	0	0	0	0	0	0	0	0	0	0	0	0	0	0	0	0	0	0	0	0	0	0	0	0	0	0	0	0	0	0	0	0	0	0	0	0	0	0	0	0	0	0	0	0	0	0
M00344	0.25	0.25	0.25	0	0.25	0.25	0.25	0.25	0.25	0.25	0.25	0.25	0.25	0.25	0.25	0	0.25	0.25	0.25	0.25	0.25	0.25	0.25	0.25	0.25	0.25	0.25	0.25	0.25	0.25	0.25	0.25	0.25	0.5	0.25	0.25	0	0.25	0.25	0.25	0.25	0.25	0.25	0.25	0.25	0.25	0.25	0.25	0.25
M00345	0.666667	0.666667	0.666667	0	0.666667	0.333333	0.666667	0.666667	0.666667	0.666667	0.666667	0.666667	0.333333	0.666667	0.333333	0	0.333333	0.666667	0.666667	0.333333	0.666667	0.666667	0.666667	0.666667	0.666667	0.666667	0.666667	0.333333	0.666667	0.333333	0.666667	0.333333	0.333333	0.333333	0.333333	0.333333	0	0.333333	0.666667	0.333333	0.333333	0.666667	0.666667	0.333333	0.666667	0.666667	0.666667	0.666667	0.333333
M00346	0.444444	0.333333	0.333333	0.111111	0.333333	0.222222	0.222222	0.444444	0.222222	0.333333	0.444444	0.333333	0.222222	0.222222	0.111111	0.111111	0.333333	0.111111	0.111111	0.333333	0.111111	0.222222	0.444444	0.444444	0.222222	0.222222	0.111111	0.222222	0.333333	0.222222	0.444444	0.111111	0.111111	0.444444	0.333333	0.111111	0.222222	0.111111	0.111111	0.333333	0.222222	0.111111	0.222222	0.222222	0.111111	0.222222	0.111111	0.333333	0.222222
M00356	0	0	0	0	0.333333	0	0	0	0	0.333333	0	0	0	0	0.333333	0	0	0	0	0	0	0	0	0	0	0	0	0	0	0	0	0	0	0	0.333333	0	0	0	0	0	0	0	0	0	0	0	0	0	0
M00357	0	0.2	0	0	0.4	0	0	0	0	0.2	0	0	0	0	0.2	0	0	0	0.2	0.2	0	0	0	0	0	0	0.2	0	0	0	0	0	0	0	0.2	0.2	0	0	0	0	0	0	0.2	0.2	0	0	0	0	0
M00358	0	0.25	0	0	0	0	0	0	0	0	0	0	0.25	0.25	0.5	0	0	0.25	0	0	0	0.25	0	0	0	0.25	0	0	0	0	0	0	0	0	0	0	0	0	0	0	0	0	0	0	0	0	0	0	0
M00363	0	0	0	0	0	0	0	0	0	0	0	0	0	0	0	0	0	0	0	0	0	0	0	0	0	0	0	0	0	0	0	0	0	0	0	0	0	0	0	0	0	0	0	0	0	0	0	0	0
M00364	1	0.5	0	0.5	0	0	0	1	0	0.5	0.5	0.5	0	0.5	0	0.5	0.5	0	0	0.5	0	1	0.5	0.5	0.5	0.5	0.5	0	0.5	0	0.5	0.5	0	0.5	0	0	0.5	0.5	0	0.5	1	0	0	0.5	0.5	0.5	0	0	1
M00365	1	0.5	0	0.5	0	0	0	1	0	0	0.5	0.5	0	0	0	0.5	0.5	0	0	0.5	0	0.5	0.5	0.5	0.5	0	0.5	0	0.5	0	0.5	0.5	0	0	0	0	0.5	0.5	0	0.5	0.5	0	0	0	0	0	0	0	0.5
M00366	0.25	0.25	0	0.25	0	0	0	0.25	0	0.25	0.25	0.25	0	0.25	0	0.25	0.25	0	0	0.25	0	0.5	0.25	0.25	0.25	0.25	0.25	0	0.25	0	0.25	0.25	0	0	0	0	0.25	0.25	0	0.25	0.25	0	0	0.25	0.25	0.25	0	0	0.5
M00367	0.333333	0.333333	0	0.333333	0	0	0	0.333333	0	0	0.333333	0.333333	0	0	0	0.333333	0.333333	0	0	0.333333	0	0.333333	0.333333	0.333333	0.333333	0	0.333333	0	0.333333	0	0.333333	0.333333	0	0	0	0	0.333333	0.333333	0	0.333333	0.333333	0	0	0	0	0	0	0	0.333333
M00368	0.333333	0.333333	0.333333	0.333333	0.333333	0.333333	0.333333	0.333333	0.333333	0.333333	0.333333	0.333333	0.333333	0.333333	0.333333	0.333333	0.333333	0.333333	0.333333	0.333333	0.333333	0.333333	0.333333	0.333333	0.333333	0.333333	0.333333	0.333333	0.333333	0.333333	0.333333	0.333333	0.333333	0.333333	0.333333	0.333333	0	0.333333	0.333333	0.333333	0.333333	0.333333	0.333333	0	0.333333	0.333333	0.333333	0.333333	0.333333
M00372	0	0	0	0	0	0	0	0	0	0	0	0	0	0	0	0	0	0	0	0	0	0	0	0	0	0	0	0	0	0	0	0	0	0	0	0	0	0	0	0	0	0	0	0	0	0	0	0	0
M00373	0.166667	0.25	0.0833333	0	0	0	0	0.166667	0	0	0.166667	0	0	0	0	0	0	0.0833333	0.0833333	0.0833333	0.0833333	0	0	0	0.0833333	0	0.166667	0	0	0.166667	0.0833333	0	0	0	0	0	0	0.0833333	0.0833333	0.0833333	0	0.0833333	0	0.0833333	0	0	0	0.0833333	0.0833333
M00374	0.230769	0.153846	0.0769231	0	0.0769231	0	0.0769231	0.0769231	0	0	0.153846	0.0769231	0.0769231	0	0.0769231	0.0769231	0.0769231	0.0769231	0.153846	0.153846	0.0769231	0.0769231	0.0769231	0.0769231	0.230769	0	0.230769	0.0769231	0.0769231	0.0769231	0.153846	0.0769231	0.0769231	0.230769	0	0.0769231	0	0.153846	0.0769231	0.230769	0.0769231	0.153846	0	0.0769231	0.0769231	0	0	0.153846	0.0769231
M00375	0.0714286	0.142857	0.0714286	0	0	0	0	0.0714286	0	0	0.0714286	0	0	0	0	0	0	0.0714286	0.0714286	0.0714286	0.0714286	0	0	0	0.0714286	0	0.142857	0	0	0.0714286	0.0714286	0	0	0	0	0	0	0.142857	0.0714286	0.0714286	0	0.0714286	0	0.0714286	0	0	0	0.0714286	0.0714286
M00376	0.230769	0.0769231	0	0	0.0769231	0.0769231	0	0.153846	0	0.153846	0.230769	0	0	0.0769231	0	0.0769231	0.0769231	0	0.0769231	0.0769231	0	0	0	0.0769231	0.0769231	0.0769231	0.153846	0	0.0769231	0.0769231	0	0.0769231	0.0769231	0.0769231	0.153846	0.0769231	0	0	0	0	0.0769231	0.0769231	0.0769231	0	0	0	0	0	0.0769231
M00377	0.428571	0.285714	0.285714	0.142857	0.714286	0.142857	0.428571	0.428571	0.285714	0.428571	0.285714	0.428571	0.857143	0.428571	0.142857	0.285714	0.428571	0.285714	0.428571	0.285714	0.285714	0.428571	0.428571	0.428571	0.428571	0.428571	0.285714	0.428571	0.428571	0.285714	0.428571	0.285714	0.285714	0.285714	0.428571	0.285714	0.142857	0.142857	0.142857	0.428571	0.142857	0.428571	0.428571	0.285714	0.285714	0.285714	0.285714	0.285714	0.428571
M00378	0	0	0	0	0	0	0	0	0	0	0	0	0	0	0	0	0	0	0	0	0	0	0	0	0	0	0	0	0	0	0	0	0	0	0	0	0	0	0	0	0	0	0	0	0	0	0	0	0
M00417	0	0	0	0	0	0	0	0	0	0	0	0	0	0	0	0	0	0	0	0	0	0	0	0	0	0	0	0	0	0	0	0	0	0	0	0	0	0	0	0	0	0	0	0	0	0	0	0	0
M00432	1	1	0	0	0	0	1	1	0	1	1	1	0	1	0	0	0.333333	0	1	1	0	1	1	1	1	1	0	1	1	0	1	0	0	1	1	0	0	0	0	1	0	1	0	0	0.333333	0.333333	0.333333	1	1
M00525	0.555556	0.777778	0.333333	0	0.444444	0.555556	0.666667	0.555556	0.333333	0.666667	0.666667	0.666667	0.555556	0.666667	0.111111	0	0.555556	0.555556	0.666667	0.777778	0	0.666667	0.555556	0.666667	0.555556	0.666667	0.888889	0.666667	0.666667	0.444444	0.666667	0.444444	0.555556	0.666667	0.666667	0.444444	0	0.555556	0	0.777778	0.111111	0.777778	0.333333	0.333333	0.555556	0.555556	0.666667	0.666667	0.444444
M00526	0.833333	0.833333	0.5	0	0.5	0.5	0.833333	0.833333	0.333333	0.833333	0.666667	0.833333	0.666667	0.833333	0	0	1	0.5	0.833333	1	0	0.833333	0.833333	1	0.666667	0.833333	0.833333	0.833333	1	0.5	1	0.5	0.666667	0.833333	0.833333	0.5	0	0.666667	0	1	0.166667	1	0.333333	0.5	0.666667	0.666667	0.666667	0.833333	0.666667
M00527	0.857143	1	0.428571	0	0.571429	0.571429	1	0.857143	0.428571	1	0.857143	1	0.714286	1	0.142857	0	0.714286	0.571429	0.857143	1	0	1	0.857143	1	0.857143	1	0.857143	1	1	0.571429	1	0.714286	0.857143	0.857143	1	0.714286	0	0.714286	0	1	0.142857	1	0.428571	0.428571	0.714286	0.857143	0.857143	1	0.571429
M00529	0	0	0	0	0	0	0	0	0	0	0	0	0	0	0	0	0	0	0	0	0	0	0	0	0	0	0	0	0	0	0	0	0	0.25	0	0	0	0	0	0	0	0	0	0	0	0	0	0	0
M00530	0.5	0	0	0	0	0	0	0.5	0	0	0	0	0	0	0	0	0	0	0	0	0	0	0	0	0	0	0	0	0	0	0	0	0	0.5	0	0	0	0	0	0	0	0	0	0	0	0	0	0	0
M00531	0	0	0	0	0	0	0	0	0	0	0	0	0	0	0	0	0	0	0	0	0	0	0	0	0	0	0	0	0	0	0	0	0	0	0	0	0	0	0	0	0	0	0	0	0	0	0	0	0
M00532	0.2	0.1	0.1	0	0.1	0.1	0.1	0.3	0.1	0.1	0.2	0.1	0	0.1	0.1	0	0.1	0.1	0	0.1	0.1	0.1	0.1	0.1	0.1	0.1	0.1	0.1	0.1	0.1	0.1	0	0	0.1	0.1	0	0.1	0.1	0.1	0.1	0.1	0	0.1	0.1	0	0.1	0.1	0.1	0.2
M00533	0	0	0	0	0	0	0	0	0	0	0	0	0	0	0	0	0	0	0	0	0	0	0	0	0	0	0	0	0	0	0	0	0	0	0	0	0	0	0	0	0	0	0	0	0	0	0	0	0
M00535	1	0.666667	0	0	0	0	0.666667	1	0	0.666667	0.666667	0.666667	0	0.666667	0	0	0	0	0.666667	0.666667	0	0.666667	0.666667	0.666667	0.666667	0.666667	0	0.666667	0.666667	0	0.666667	0	0	0.666667	0.666667	0	0	0	0	0.666667	0.333333	0.666667	0	0	0	0	0.333333	0.666667	0.666667
M00537	0	0	0	0	0	0	0	0	0	0	0	0	0	0	0	0	0	0	0	0	0	0	0	0	0	0	0	0	0	0	0	0	0	0	0	0	0	0	0	0	0	0	0	0	0	0	0	0	0
M00538	0	0	0	0	0	0	0	0	0	0	0	0	0	0	0	0	0	0	0	0	0	0	0	0	0	0	0	0	0	0	0	0	0	0	0	0	0	0	0	0	0	0	0	0	0	0	0	0	0
M00540	0	0	0	0	0	0	0	0	0	0	0	0	0	0	0	0	0	0	0	0	0	0	0	0	0	0	0	0	0	0	0	0	0	0	0	0	0	0	0	0	0	0	0	0	0	0	0	0	0
M00542	0	0	0	0	0	0	0	0	0	0	0	0	0	0	0	0	0	0	0	0	0	0	0	0	0	0	0	0	0	0	0	0	0	0	0	0	0	0	0	0	0	0	0	0	0	0	0	0	0
M00545	0	0	0	0	0	0	0	0	0	0	0	0.166667	0	0	0	0	0	0	0.166667	0	0	0.166667	0.166667	0.166667	0.166667	0	0	0	0.166667	0	0	0	0	0	0.166667	0	0	0	0	0.166667	0	0.166667	0	0	0	0	0	0	0
M00546	0	0	0	0	0.2	0	0	0	0	0	0	0	0	0	0	0	0	0.4	0	0	0	0	0	0	0	0	0.2	0	0	0	0	0	0	0	0	0	0	0.2	0	0	0	0	0	0	0	0	0.2	0	0
M00549	0.666667	0.666667	0.333333	0.333333	0.666667	0.333333	1	0.666667	0.666667	0.666667	0.666667	0.666667	0.666667	1	0.333333	0.333333	0.666667	0.333333	0.666667	0.666667	0.333333	1	0.666667	0.666667	0.666667	1	0	0.666667	0.666667	0.333333	0.666667	0.666667	0.333333	0.666667	0.666667	0.666667	0.333333	0.666667	0.333333	0.666667	0.666667	0.666667	0.333333	0	1	1	0.666667	1	0
M00550	0.4	0.6	0	0	0.4	0	0	0	0	0	0	0	0	0.2	0	0	0	0	0.2	0	0	0.2	0.4	0.4	0.2	0.2	0.6	0.4	0.4	0	0.2	0	0	0	0	0	0	0	0	0.4	0	0.4	0.2	0	0.2	0.2	0.6	0	0
M00551	0	0	0	0	0	0	0	0	0	0	0	0	0	0	0	0	0	0	0	0	0	0	0	0	0	0	0	0	0	0	0	0	0	0	0	0	0	0	0	0	0	0	0	0	0	0	0	0	0
M00552	0.4	0.4	0.4	0.4	0.4	0.4	0.4	0.4	0.4	0.4	0.4	0	0.4	0.4	0.4	0.4	0.4	0.4	0.4	0.4	0.4	0.4	0.4	0.4	0.4	0.4	0.4	0.4	0.4	0.4	0.4	0.4	0.4	0.4	0.4	0.4	0.4	0.4	0.4	0.4	0.4	0.4	0.4	0.4	0.2	0.4	0.4	0.6	0.4
M00554	0.5	0.5	0	0	0	0	0.5	0.5	0	0	0.5	0.5	0	0	0	0	0.5	0	0	0	0	0	0	0	0	0	0.5	0	0	0	0	0	0	0	0.5	0	0	0	0	0.5	0	0	0	0	0.5	0.5	0	0	0
M00555	0	0	0	0	0	0	0	0	0	0	0	0	0	0	0	0	0	0	0	0	0	0	0	0	0	0	0	0	0	0	0	0	0	0	0	0	0	0	0	0	0	0	0	0	0	0	0	0	0
M00563	0	0	0	0	0.25	0	0	0	0	0.25	0	0	0.25	0	0.25	0	0.25	0	0	0	0	0	0	0	0	0	0	0	0	0	0	0	0	0	0.25	0	0	0	0	0	0	0	0	0	0	0	0	0	0
M00564	0	0	0	0	0	0	0	0	0	0	0	0	0	0	0	0	0	0	0	0	0	0	0.0434783	0	0	0	0	0	0.0434783	0	0	0	0	0	0	0	0	0	0	0	0	0	0	0	0	0	0	0	0
M00565	0.333333	0.5	0.5	0	0.5	0.5	0.5	0.333333	0.5	0.5	0.333333	0.5	0.5	0.5	0.5	0.166667	0.5	0.5	0.5	0.5	0.5	0.5	0.5	0.5	0.5	0.5	0.5	0.5	0.5	0	0.5	0.166667	0.166667	0	0.5	0.166667	0	0.5	0.5	0.5	0.5	0.5	0.5	0.5	0.5	0.333333	0.5	0.5	0
M00567	0	0	0	0	0.125	0	0	0	0	0.125	0	0	0	0	0.125	0	0	0	0	0	0	0	0	0	0	0	0	0	0	0	0	0	0	0	0.125	0	0	0	0	0	0	0	0	0	0	0	0	0	0
M00568	0	0	0	0	0	0	0	0	0	0	0	0	0	0	0.25	0	0.25	0	0	0	0	0.25	0	0	0	0	0	0.25	0	0.25	0	0	0	0.25	0	0	0	0	0	0	0	0	0	0	0	0	0	0	0
M00569	0	0	0	0	0	0	0	0	0	0	0	0.2	0	0	0	0	0	0	0.2	0	0	0.2	0.2	0.2	0.2	0	0	0	0.2	0	0	0	0	0	0.2	0	0	0	0	0.2	0	0.2	0	0	0	0	0	0	0
M00570	0.8	1	0.2	0	0.2	0.2	1	0.8	0	1	0.8	1	0.2	1	0.2	0	0	0.2	1	1	0.2	1	1	1	0.8	1	0.6	1	1	0.4	1	0	0	1	1	0	0	0.2	0	1	0	1	0.2	0.2	0.4	0.4	0	1	1
M00572	1	0.5	0.166667	0	0.166667	0.166667	0.166667	1	0	0.5	0.666667	0.5	0	0	0	0.666667	0.5	0.166667	0.5	0.5	0.166667	0	0.5	0.5	0.5	0	0.5	0.166667	0.5	0.166667	0.166667	0.666667	0.666667	0.666667	0.5	0.666667	0	0.166667	0	0.5	0.666667	0.5	0.166667	0.166667	0.166667	0.166667	0.166667	0.5	0.5
M00573	0.6	0.2	0.2	0	0.2	0	0	0.6	0	0.2	0	0.4	0	0	0.4	0	0	0.2	0.4	0.2	0.2	0	0.2	0.2	0.2	0	0	0	0.2	0.4	0	0	0	0.2	0.2	0	0	0	0.2	0.2	0.2	0.4	0.2	0	0	0	0	0	0
M00574	0	0	0	0	0	0	0	0	0	0	0	0	0	0	0	0	0	0	0	0	0	0	0	0	0	0	0	0	0	0	0	0	0	0	0	0	0	0	0	0	0	0	0	0	0	0	0	0	0
M00575	0.2	0	0	0	0	0	0	0.2	0	0	0.2	0	0	0	0	0	0	0	0	0	0	0	0	0	0	0	0	0	0	0	0	0	0	0.2	0	0	0	0	0	0	0.4	0	0	0	0	0	0	0	0
M00577	0.8	0.2	0.2	0	0.2	0	0	0.8	0	0.2	0	0.6	0	0	0.4	0	0	0.2	0.6	0.2	0.2	0	0.2	0.2	0.2	0	0	0	0.2	0.4	0	0	0	0.2	0.2	0	0	0	0.2	0.2	0.2	0.6	0.2	0	0	0	0	0	0
M00579	0.5	1	1	1	1	0.5	1	0.5	1	1	0.5	0.5	1	1	1	0.5	0.5	0.5	1	1	1	1	0.5	0.5	0.5	1	1	1	0.5	0.5	0.5	0.5	0.5	0	1	1	1	0	0.5	0.5	0.5	0.5	1	1	1	1	1	0.5	1
M00580	0.5	0	0	0	0	0	0	0	0	0	0	0	0	0	0	0.5	0	0	0	0	0	0	0	0	0	0	0	0	0	0	0	0	0.5	0.5	0	0	0	0	0	0	0	0	0	0	0	0	0	0	0
M00596	0	0	0	0	0	0	0	0	0	0.333333	0	0.333333	0	0	0	0	0	0	0	0	0	0	0.333333	0.333333	0.333333	0	0	0	0.333333	0	0	0	0	0	0	0	0	0	0	0	0	0	0	0	0	0	0	0	0
M00609	0.333333	0.5	0.333333	0.166667	0.333333	0.333333	0.166667	0.5	0.333333	0.5	0.166667	0.5	0.5	0.5	0.333333	0.166667	0.5	0.5	0.5	0.5	0.5	0.5	0.5	0.5	0.5	0.5	0.5	0.5	0.5	0.333333	0.5	0.333333	0.166667	0.333333	0.5	0.333333	0.166667	0.333333	0.5	0.5	0.166667	0.5	0.166667	0	0.5	0.5	0.333333	0.5	0.166667
M00611	0	0	0	0	0	0	0	0	0	0	0	0	0	0	0	0	0	0	0	0	0	0	0	0	0	0	0	0	0	0	0	0	0	0	0	0	0	0	0	0	0	0	0	0	0	0	0	0	0
M00612	0	0	0	0	0	0	0	0	0	0	0	0	0	0	0	0	0	0	0	0	0	0	0	0	0	0	0	0	0	0	0	0	0	0	0	0	0	0	0	0	0	0	0	0	0	0	0	0	0
M00614	0	0	0	0	0	0	0	0	0	0	0	0	0	0	0	0	0	0	0	0	0	0	0	0	0	0	0	0	0	0	0	0	0	0	0	0	0	0	0	0	0	0	0	0	0	0	0	0	0
M00615	0	0	0	0	0	0	0	0	0	0	0	0	0	0	0	0	0	0	0	0	0	0	0	0	0	0	0	0	0	0	0	0	0	0.5	0	0	0	0	0	0	0	0	0	0	0	0	0	0	0
M00616	0	0	0	0	0	0	0	0	0	0	0	0	0	0	0	0	0	0	0	0	0	0	0	0	0	0	0	0	0	0	0	0	0	0	0	0	0	0	0	0	0	0	0	0	0	0	0	0	0
M00618	0	0.5	0.5	0.5	0.5	0	0.5	0	0.5	0.5	0	0	1	0.5	0.5	0	0	0	0.5	0.5	0.5	0.5	0	0	0	0.5	0.5	0.5	0	0	0	0	0	0	0.5	0.5	0.5	0	0	0	0	0	0.5	0.5	0.5	0.5	0.5	0	0.5
M00620	0.428571	0.142857	0	0	0.285714	0.142857	0.142857	0.285714	0	0.142857	0.285714	0.142857	0.142857	0	0.285714	0.142857	0.142857	0.142857	0.142857	0.142857	0.142857	0.142857	0.142857	0.142857	0.285714	0	0.285714	0.142857	0.142857	0.142857	0.142857	0.142857	0.142857	0.285714	0.142857	0.142857	0	0	0.142857	0.285714	0.142857	0.142857	0	0	0.142857	0.142857	0	0.142857	0.142857
M00622	0	0	0	0	0	0	0	0	0	0	0	0	0	0	0	0	0.166667	0	0	0	0	0	0	0	0	0	0	0	0	0	0	0	0	0	0	0	0	0	0	0	0	0.166667	0	0	0	0	0	0	0
M00623	0	0	0	0	0	0	0	0	0	0	0	0	0	0	0	0	0	0	0	0	0	0	0	0	0	0	0	0	0	0	0	0	0	0	0	0	0	0	0	0	0	0	0	0	0	0	0	0	0
M00627	1	0	0	0.333333	1	0	0	1	0	0	1	0.666667	1	0.666667	0.666667	0	0.666667	0.666667	0.333333	0.666667	0.666667	0	0.666667	0	0.666667	0.666667	0.666667	0	0	0	0.666667	0	0	0	0	0	0.333333	0.666667	0.666667	0.333333	0.333333	0.666667	0.666667	0.666667	0	0	0.666667	0.666667	0.666667
M00631	0.8	0	0.6	0	0.4	0	0.6	1	0	0	0	0	0.4	1	0.2	0	0	0	0.4	1	0	0.6	1	1	0	0.6	0.2	0.8	1	0	0.6	0	0	0	0	0	0	0	0	1	0	0.4	0	0	0.6	0.6	0	1	0
M00632	0.75	0.75	0	0.25	0.5	0.25	0.75	0.75	0.25	0.5	0.75	0.75	0.5	0.5	0.25	0.25	0.75	0	0.5	0.5	0.25	0.5	0.5	0.5	0.5	0.5	0.75	0.5	0.5	0	0.5	0.5	0.25	0.25	0.75	0.5	0	0	0.25	0.75	0.25	0.5	0.5	0	0.5	0.5	0.5	0.5	0.25
M00633	0	0	0	0	0	0	0	0	0	0	0	0	0	0	0	0	0	0	0	0	0	0	0	0	0	0	0	0	0	0	0	0	0	0	0	0	0	0	0	0	0	0	0	0	0	0	0	0	0
M00638	0	0	0	0	0	0	0	0	0	0	0	0	0	0	0	0	0	0	0	0	0	0	0	0	0	0	0	0	0	0	0	0	0	0	0	0	0	0	0	0	0	0	0	0	0	0	0	0	0
M00641	0	0	0	0	0	0	0	0	0	0	0	0	0	0	0	0	0	0	0	0	0	0	0	0	0	0	0	0	0	0	0	0	0	0	0	0	0	0	0	0	0	0	0	0	0	0	0	0	0
M00642	0	0	0	0	0	0	0	0	0	0	0	0	0	0	0	0	0	0	0	0	0	0	0	0	0	0	0	0	0	0	0	0	0	0	0	0	0	0	0	0	0	0	0	0	0	0	0	0	0
M00649	0	0	0	0	0	0	0	0	0	0	0	0	0	0	0	0	0	0	0	0	0	0	0	0	0	0	0	0	0	0	0	0	0	0	0	0	0	0	0	0	0	0	0	0	0	0	0	0	0
M00651	0	0	0	0	0	0	0	0	0	0	0	0	0	0	0	0	0	0	0	0	0	0	0	0	0	0	0	0	0	0	0	0	0	0	0	0	0	0	0	0	0	0	0	0	0	0	0.5	0	0
M00652	0	0.4	1	0.4	0	0	0.2	0	0	0	0	0.4	0	0	0	0	0	0	0.4	0.4	0	0	0.2	0.2	0.4	0.4	0	0	0.2	0	0.2	0	0.2	0	0	0	0	0	1	0.2	0	0.4	0	0	0	0	1	0	0.4
M00664	0	0	0	0	0	0	0	0	0	0	0	0	0	0	0	0	0	0	0	0	0	0	0	0	0	0	0	0	0	0	0	0	0	0	0	0	0	0	0	0	0	0	0	0	0	0	0	0	0
M00696	0	0	0	0	0	0	0	0	0	0	0	0	0	0	0	0	0	0	0	0	0	0	0	0	0	0	0	0	0	0	0	0	0	0	0	0	0	0	0	0	0	0	0	0	0	0	0	0	0
M00697	0	0	0	0	0	0	0	0	0	0	0	0	0	0	0	0	0	0	0	0	0	0	0	0	0	0	0	0	0	0	0	0	0	0	0	0	0	0	0	0	0	0	0	0	0	0	0	0	0
M00698	0	0	0	0	0	0	0	0	0	0	0	0	0	0	0	0	0	0	0	0	0	0	0	0	0	0	0	0	0	0	0	0	0	0	0	0	0	0	0	0	0	0	0	0	0	0	0	0	0
M00700	0	0	0	0	0	0	0	0	0	0	0	0	0	0	0	0	0	0	0	0.5	0	0	0	0	0	0	0	0	0	0	0	0	0	0	0	0	0	0	0	0	0	0	0	0	0	0	0	0	0
M00702	0	0	0	0	0	0	0	0	0	0	0	0	0	0	0	0	0	0	0	0.5	0	0	0	0	0	0	0	0	0	0	0	0	0	0	0	0	0	0	0	0	0	0	0	0	0	0	0	0	0
M00704	0	0	0	0	0	0	0	0	0	0	0	0	0	0	0	0	0	0	0	0	0	0	0	0	0	0	0	0	0	0	0	0	0	0	0	0	0	0	0	0	0	0	0	0	0	0	0	0	0
M00705	0.5	0.5	1	0	1	0.5	0.5	0.5	1	1	0	0.5	0.5	1	0.5	0	0.5	0.5	0.5	1	0.5	0.5	0.5	0.5	1	1	1	0.5	1	0.5	0.5	0	0	0	1	0	0	1	0.5	1	0	1	1	0	1	1	0.5	1	1
M00714	0	0	0	0	0	0	0	0	0	0	0	0	0	0	0	0	0	0	0	0	0	0	0	0	0	0	0	0	0	0	0	0	0	0	0	0	0	0	0	0	0	0	0	0	0	0	0	0	0
M00718	0	0	0	0	0	0	0	0.5	0	0	0.5	0	0	0	0	0	0	0	0	0	0	0	0	0	0	0	0	0	0	0	0	0	0	0.5	0	0	0	0	0	0	0	0	0	0	0	0	0	0	0
M00725	0	0	0	0	0	0	0	0	0	0	0	0	0	0	0	0	0	0	0	0	0	0	0	0	0	0	0	0	0	0	0	0	0	0	0	0	0	0	0	0	0	0	0	0	0	0	0	0	0
M00726	0	0	0	0	0	0	0	0	0	0	0	0	0	0	0	0	0	0	0	0	0	0	0	0	0	0	0	0	0	0	0	0	0	0	0	0	0	0	0	0	0	0	0	0	0	0	0	0	0
M00730	0	0	0	0	0	0	0	0	0	0	0	0	0	0	0	0	0	0	0	0	0	0	0	0	0	0	0	0	0	0	0	0	0	0	0	0	0	0	0	0	0	0	0	0	0	0	0	0	0
M00740	0.272727	0.181818	0.181818	0	0.363636	0	0.181818	0.272727	0	0.181818	0.0909091	0.181818	0.0909091	0.0909091	0.272727	0	0.181818	0.181818	0	0.0909091	0.0909091	0.0909091	0.181818	0.181818	0.181818	0.0909091	0.181818	0.0909091	0.181818	0.0909091	0.181818	0	0	0.0909091	0.181818	0	0	0	0.0909091	0.181818	0	0	0.181818	0	0.181818	0.0909091	0.0909091	0	0.0909091
M00741	0.666667	0.333333	0	0	0	0	0	0.666667	0	0	0.666667	0	0	0	0	0	0	0	0	0	0	0	0	0	0	0	0	0	0	0	0	0	0	0	0	0	0	0	0	0	0	0	0	0	0	0	0	0	0
M00744	0	0	0	0	0	0	0	0	0	0	0	0	0	0	0	0	0	0	0	0	0	0	0	0	0	0	0	0	0	0	0	0	0	0	0	0	0	0	0	0	0	0	0	0	0	0	0	0	0
M00745	0	0	0	0	0	0	0	0	0	0	0	0	0	0	0	0	0	0	0	0	0	0	0	0	0	0	0	0	0	0	0	0	0	0	0	0	0	0	0	0	0.5	0	0	0	0	0	0	0	0
M00746	0	0	0	0	0	0	0	0	0	0	0	0	0	0	0	0	0	0	0	0	0	0	0	0	0	0	0	0	0	0	0	0	0	0	0	0	0	0	0	0	0	0	0	0	0	0	0	0	0
M00761	0	0	0	0	0	0	0	0	0	0	0	0	0	0	0	0	0	0	0	0	0	0	0	0	0	0	0	0	0	0	0	0	0	0	0	0	0	0	0	0	0	0	0	0	0	0	0	0	0
M00763	0	0	0	0	0	0	0	0	0	0	0	0	0.166667	0	0	0	0	0.166667	0	0	0	0	0	0	0	0	0	0	0	0	0	0	0	0	0	0	0	0	0	0	0	0	0.166667	0.166667	0	0	0	0	0
M00769	0	0	0	0	0	0	0	0	0	0	0	0	0	0	0	0	0	0	0	0	0	0	0	0	0	0	0	0	0	0	0	0	0	0	0	0	0	0	0	0	0	0	0	0	0	0	0	0	0
M00780	0	0	0	0	0	0	0	0	0	0	0	0	0	0	0	0	0	0	0	0	0	0	0	0	0	0	0	0	0	0	0	0	0	0	0	0	0	0	0	0	0	0	0	0	0	0	0	0	0
M00789	0	0	0	0	0	0	0	0	0	0	0	0	0	0	0	0	0	0	0	0	0	0	0	0	0	0	0	0	0	0	0	0	0	0	0	0	0	0	0	0	0	0	0	0	0	0	0	0	0
M00790	0	0	0	0	0	0	0	0	0	0	0	0	0	0	0	0	0	0	0	0	0	0	0	0	0	0	0	0	0	0	0	0	0	0	0	0	0	0	0	0	0	0	0	0	0	0	0	0	0
M00793	1	1	0	0	0	1	0	1	0	0	1	1	1	0.666667	0	0	0	0	1	1	1	0.666667	1	1	1	0	0	1	1	0	1	1	0	0	1	0	1	0	1	1	1	1	0	0	1	0.666667	1	1	0
M00797	0	0	0	0	0	0	0	0	0	0	0	0	0	0	0	0	0	0	0	0	0	0	0	0	0	0	0	0	0	0	0	0	0	0	0	0	0	0	0	0	0	0	0	0	0	0	0	0	0
M00798	0	0	0	0	0	0	0	0	0	0	0	0	0	0	0	0	0	0	0	0	0	0	0	0	0	0	0	0	0	0	0	0	0	0	0	0	0	0	0	0	0	0	0	0	0	0	0	0	0
M00799	0	0	0	0	0	0	0	0	0	0	0	0	0	0	0	0	0	0	0	0	0	0	0	0	0	0	0	0	0	0	0	0	0	0	0	0	0	0	0	0	0	0	0	0	0	0	0	0	0
M00800	0	0	0	0	0	0	0	0	0	0	0	0	0	0	0	0	0	0	0	0	0	0	0	0	0	0	0	0	0	0	0	0	0	0	0	0	0	0	0	0	0	0	0	0	0	0	0	0	0
M00801	0	0	0	0	0	0	0	0	0	0	0	0	0	0	0	0	0	0	0	0	0	0	0	0	0	0	0	0	0	0	0	0	0	0	0	0	0	0	0	0	0	0	0	0	0	0	0	0	0
M00802	0	0	0	0	0	0	0	0	0	0	0	0	0	0	0	0	0	0	0	0	0	0	0	0	0	0	0	0	0	0	0	0	0	0	0	0	0	0	0	0	0	0	0	0	0	0	0	0	0
M00803	0	0	0	0	0	0	0	0	0	0	0	0	0	0	0	0	0	0	0	0	0	0	0	0	0	0	0	0	0	0	0	0	0	0	0	0	0	0	0	0	0	0	0	0	0	0	0	0	0
M00804	0	0	0	0	0	0	0	0	0	0	0	0	0	0	0	0	0	0	0	0	0	0	0	0	0	0	0	0	0	0	0	0	0	0.333333	0	0	0	0	0	0	0	0	0	0	0	0	0	0	0
M00814	0	0	0	0	0	0	0	0	0	0	0	0	0	0	0	0	0	0	0	0	0	0	0	0	0	0	0	0	0	0	0	0	0	0	0	0	0	0	0	0	0	0	0	0	0	0	0	0	0
M00823	0	0	0	0	0	0	0	0	0	0	0	0	0	0	0	0	0	0	0	0	0	0	0	0	0	0	0	0	0	0	0	0	0	0	0	0	0	0	0	0	0	0	0	0	0	0	0	0	0
M00835	0	0	0.142857	0	0	0	0	0	0	0.142857	0	0	0	0	0	0	0.142857	0.142857	0	0	0.142857	0	0	0	0	0	0	0	0	0	0	0	0	0.142857	0	0	0	0	0.142857	0	0	0	0	0	0	0	0	0	0.142857
M00840	0.428571	0.428571	0.142857	0.142857	0	0.142857	0.142857	0.428571	0.142857	0.142857	0.428571	0.428571	0.142857	0.285714	0	0	0	0.142857	0.285714	0.142857	0.142857	0.142857	0.285714	0.285714	0.285714	0.285714	0.142857	0	0.428571	0.142857	0.285714	0.142857	0.142857	0.285714	0.285714	0.142857	0.142857	0.142857	0.142857	0.142857	0.142857	0.142857	0	0.142857	0.285714	0.285714	0	0.142857	0.285714
M00841	0.4	0.4	0	0	0.2	0.2	0.4	0.4	0.2	0.4	0.4	0.4	0	0.4	0	0	0	0.2	0	0.2	0.2	0.4	0.4	0.4	0.4	0.4	0.2	0.2	0.4	0	0.4	0	0	0.2	0.2	0	0	0	0.2	0.2	0	0.2	0.2	0	0.4	0.4	0.2	0.2	0.2
M00842	0.666667	0.666667	0	0	0	0	0.333333	0.666667	0	0.666667	0.666667	0.666667	0	0.333333	0	0	0	0	0	0	0	0.333333	0.666667	0.666667	0.666667	0.333333	0	0	0.666667	0	0.333333	0	0	0.333333	0.666667	0	0	0	0	0	0	0	0	0	0.333333	0.333333	0	0	0
M00843	0.666667	0.666667	0	0	0	0	0.333333	0.666667	0	0.666667	0.666667	0.666667	0	0.333333	0	0	0	0	0	0	0	0.333333	0.666667	0.666667	0.666667	0.333333	0	0	0.666667	0	0.333333	0	0	0.333333	0.666667	0	0	0	0	0	0	0	0	0	0.333333	0.333333	0	0	0
M00844	0.666667	1	0.666667	0.333333	1	1	1	0.666667	0	1	0.666667	1	1	1	0.333333	0	0	0	1	0.666667	0.333333	1	1	1	1	1	1	1	1	0	1	0	0	1	1	0	0.333333	0.333333	0.333333	1	0	0.666667	1	0.333333	0.666667	1	0.333333	1	0.333333
M00845	0.714286	0.714286	0.285714	0	0.714286	0.571429	0.571429	0.428571	0	0.571429	0.571429	0.571429	0.285714	0.571429	0	0	0	0	0.714286	0.285714	0.142857	0.571429	0.571429	0.571429	0.571429	0.571429	0.714286	0.571429	0.571429	0	0.571429	0	0	0.571429	0.571429	0	0	0.142857	0.142857	0.571429	0	0.428571	0.428571	0.285714	0.285714	0.428571	0	0.571429	0
M00846	0.166667	1	0	0	0.166667	0	0.166667	0.166667	0	0.833333	0.166667	1	0	0.166667	0	0	0	0	0.5	0.5	0	0.166667	0.166667	0.166667	1	0.166667	0	0	1	0	0	0	0	0.833333	1	0	0	0	0	0	0	0.333333	0	0	0.166667	0	0	0	0
M00847	0	0	0	0	0	0	0	0	0	0	0	0	0	0.333333	0	0	0	0	0	0	0	0	0.333333	0.333333	0	0.333333	0	0	0.333333	0	0	0	0	0	0	0.333333	0	0	0	0	0	0	0	0	0	0	0	0	0
M00849	0.166667	0.5	0.166667	0.166667	0	0	0	0.166667	0	0	0.166667	0.166667	0	0	0	0.166667	0.166667	0.166667	0.166667	0.333333	0.166667	0.166667	0.166667	0.166667	0.333333	0	0.333333	0	0.166667	0.166667	0.333333	0.166667	0	0	0	0	0.166667	0.333333	0.166667	0.333333	0.166667	0.166667	0	0.166667	0	0	0	0.166667	0.333333
M00850	0	0	0	0	0	0	0	0	0	0	0	0	0	0.166667	0	0	0	0	0	0	0	0	0	0	0	0	0	0	0	0	0	0	0	0	0	0	0	0	0	0	0	0	0	0	0	0	0	0	0
M00851	0	0	0	0	0	0	0	0	0	0	0	0	0	0	0	0	0	0	0	0	0	0	0	0	0	0	0	0	0	0	0	0	0	0	0	0	0	0	0	0	0	0	0	0	0	0	0	0	0
M00852	0	0	0	0	0	0	0	0	0	0	0	0	0	0	0	0	0	0	0	0	0	0	0	0	0	0	0	0	0	0	0	0	0	0	0	0	0	0	0	0	0.0714286	0	0	0	0	0	0	0	0
M00854	0.5	1	1	0	1	1	1	0.5	1	1	0.5	1	1	1	1	0.5	1	1	1	1	1	1	1	1	1	1	1	1	1	0	1	0.5	0.5	0	1	0.5	0	1	1	1	0.5	1	1	1	1	0.5	1	1	0
M00855	1	0.666667	0.333333	0.333333	0.666667	0.333333	0.666667	1	1	0.666667	0.666667	1	1	0.666667	0.333333	0.666667	0.333333	0.333333	0.666667	0.666667	0.333333	0.666667	0.666667	0.666667	0.666667	0.666667	0	0.666667	0.666667	0	0.666667	0.666667	0.666667	0.333333	0.666667	0.666667	0.333333	0.666667	0.333333	1	0.666667	0.666667	0.333333	0.333333	0.666667	0.666667	0.333333	1	0
M00856	0	0	0	0	0	0	0	0	0	0	0	0	0	0	0	0	0	0	0	0	0	0	0	0	0	0	0	0	0	0	0	0	0	0	0	0	0	0	0	0	0	0	0	0	0	0	0	0	0
M00857	0	0	0	0	0	0	0	0	0	0	0	0	0	0	0	0	0	0	0	0	0	0	0	0	0	0	0	0	0	0	0	0	0	0	0	0	0	0	0	0	0	0	0	0	0	0	0	0	0
M00860	0	0	0	0	0	0	0	0	0	0	0	0	0	0	0.428571	0	0	0	0	0	0	0	0	0	0	0	0	0	0	0	0	0	0	0	0	0	0	0	0	0	0	0	0	0	0	0	0	0	0
M00866	0.888889	0	0	0	0	0	0	0.888889	0	0	0.888889	0	0	0	0	0	0	0	0	0	0	0	0	0	0	0	0	0	0	0	0	0	0	0.888889	0	0	0	0	0	0	0.888889	0	0	0	0	0	0	0	0
M00867	0.2	0	0	0	0	0	0	0.2	0	0	0.2	0	0	0	0	0	0	0	0	0	0	0	0	0	0	0	0	0	0	0	0	0	0	0.2	0	0	0	0	0	0	0.2	0	0	0	0	0	0	0	0
M00868	0.25	0.375	0	0	0	0	0	0.125	0	0.375	0.25	0.375	0	0	0	0	0	0	0.25	0.25	0	0	0	0	0.375	0	0	0	0.375	0	0	0	0	0.625	0.375	0	0	0	0	0	0	0.25	0	0	0	0	0	0	0
M00872	0	0	0	0	0	0.1	0	0	0	0	0	0	0	0	0.1	0	0	0	0	0	0	0	0	0	0.1	0	0	0.1	0	0	0.1	0	0	0	0	0	0	0	0	0	0	0	0	0	0	0	0	0	0
M00873	0.166667	0.166667	0	0	0	0	0	0.166667	0	0.166667	0.166667	0.166667	0	0	0	0.166667	0.166667	0	0.166667	0.166667	0	0	0.166667	0.166667	0.166667	0	0.166667	0	0.166667	0	0	0.166667	0.166667	0.166667	0.166667	0.166667	0	0	0	0.166667	0.166667	0.166667	0	0	0	0	0	0.166667	0.166667
M00874	0.333333	0.333333	0.166667	0	0.166667	0.166667	0.166667	0.333333	0	0.333333	0.333333	0.333333	0	0	0	0.333333	0.333333	0.166667	0.333333	0.333333	0.166667	0	0.333333	0.333333	0.333333	0	0.333333	0.166667	0.333333	0.166667	0.166667	0.333333	0.333333	0.333333	0.333333	0.333333	0	0.166667	0	0.333333	0.333333	0.333333	0.166667	0.166667	0.166667	0.166667	0.166667	0.333333	0.333333
M00875	0	0	0	0	0	0	0	0	0	0.142857	0	0	0	0	0	0	0	0	0.142857	0	0	0	0	0	0.142857	0	0	0	0	0	0	0	0	0	0.142857	0	0	0	0	0	0	0.142857	0	0	0	0	0	0	0
M00876	0	0	0.333333	0	0	0	0	0	0	0	0	0	0	0	0.333333	0	0	0.333333	0	0	0.333333	0	0	0	0	0	0	0	0	0	0	0	0	0	0	0	0	0	0.333333	0	0	0	0	0.333333	0	0	0	0	0.333333
M00877	0	0	0	0	0	0	0	0	0	0	0	0	0	0	0	0	0	0	0	0	0	0	0	0	0	0	0	0	0	0	0	0	0	0	0	0	0	0	0	0	0	0	0	0	0	0	0	0	0
M00878	0.142857	0.285714	0.142857	0	0.142857	0.142857	0.142857	0	0	0.142857	0.142857	0.142857	0	0	0.285714	0	0	0.142857	0.285714	0.285714	0.142857	0	0	0	0.142857	0	0.285714	0	0	0	0.428571	0	0	0.142857	0.142857	0	0	0.142857	0.142857	0.142857	0.142857	0.285714	0.142857	0.285714	0.142857	0	0	0.142857	0.285714
M00879	0	0	0	0	0	0	0	0	0	0	0	0	0	0	0	0	0	0	0	0	0	0	0	0	0	0	0	0	0	0	0	0	0	0	0	0	0	0	0	0	0	0	0	0	0	0	0	0	0
M00880	0	0.666667	0	0	0	0	0	0	0	0	0	0.333333	0	0	0	0	0	0	0.333333	0	0	0	0	0	0.333333	0	0.333333	0	0	0	0	0	0	1	0	0	0	0.333333	0	0.666667	0	0.333333	0.333333	0.333333	0	0	0	0.666667	0
M00881	1	0	0	0	0.5	0	0	1	0	0	1	0	0	0	0	0	0	0	0	0	0	0	0	0	0	0	0	0	0	0	0	0	0	1	0	0	0	0	0.5	0	0	0	0	0	0	0	0	0	0
M00882	0.5	0	0	0	0.5	0	0	0.5	0	0	0.5	0	0	0	0	0	0	0	0	0	0	0	0	0	0	0	0	0	0	0	0	0	0	0.5	0	0	0	0	0.5	0	0	0	0	0	0	0	0	0	0
M00883	0.333333	0	0	0	0.333333	0	0	0.333333	0	0	0.333333	0	0	0	0	0	0	0	0	0	0	0	0	0	0	0	0	0	0	0	0	0	0	0.333333	0	0	0	0	0.333333	0	0	0	0	0	0	0	0	0	0
M00884	0.5	0	0	0	0.5	0	0	0.5	0	0	0.5	0	0	0	0	0	0	0	0	0	0	0	0	0	0	0	0	0	0	0	0	0	0	0.5	0	0	0	0	0.5	0	0	0	0	0	0	0	0	0	0
M00892	0.5	0.5	0.5	0.166667	0.5	0.5	0.5	0.333333	0.166667	0.666667	0.333333	0.666667	0.5	0.5	0.666667	0.5	0.333333	0.5	0.333333	0.5	0.5	0.5	0.666667	0.666667	0.666667	0.5	0.333333	0.5	0.5	0.166667	0.666667	0.666667	0.5	0.333333	0.666667	0.666667	0.166667	0.5	0.333333	0.666667	0.5	0.5	0.5	0.333333	0.5	0.5	0.5	0.5	0.166667
M00895	0.555556	0.444444	0.111111	0.111111	0.111111	0.333333	0.444444	0.555556	0.111111	0.555556	0.444444	0.555556	0.111111	0.111111	0.111111	0	0.444444	0.111111	0.444444	0.444444	0.333333	0.111111	0.555556	0.555556	0.555556	0.111111	0.333333	0.111111	0.555556	0.111111	0.111111	0	0	0.333333	0.555556	0	0.111111	0.333333	0.111111	0.111111	0	0.444444	0	0	0	0.111111	0.111111	0.444444	0.444444
M00896	0.75	0.25	0	0	0	0.25	0.5	0.75	0	0.5	0.5	0.5	0	0	0	0	0.5	0	0.5	0.5	0.25	0	0.5	0.5	0.5	0	0.25	0	0.5	0	0	0	0	0.5	0.5	0	0	0.25	0	0	0	0.5	0	0	0	0	0	0.5	0.25
M00897	0.4	0.2	0.2	0	0.2	0.2	0.4	0.2	0.2	0.4	0	0.4	0.2	0.2	0	0	0.4	0.2	0.4	0.4	0.2	0.2	0.4	0.4	0.4	0.2	0.2	0.2	0.4	0.2	0.2	0	0	0	0.4	0	0	0.2	0.2	0.2	0	0.4	0.2	0.2	0.2	0.2	0.2	0.4	0.2
M00898	0.166667	0.166667	0.166667	0	0.166667	0.166667	0.166667	0	0.166667	0.166667	0	0.166667	0.166667	0.166667	0	0	0.166667	0.166667	0.166667	0.166667	0.166667	0.166667	0.166667	0.166667	0.166667	0.166667	0.166667	0.166667	0.166667	0.166667	0.166667	0	0	0	0.166667	0	0	0.166667	0.166667	0.166667	0	0.166667	0.166667	0.166667	0.166667	0.166667	0.166667	0.166667	0.166667
M00899	0.5	1	0	0	0	1	1	0.5	0	0.5	0.5	1	0	0	0	0	0.5	0	1	1	1	0	1	1	1	0	1	0	1	0	0	0	0	1	0.5	0	0	0.5	0	0	0	1	0	0	0	0	0	1	1
M00903	0	0	0	0	0	0	0	0	0	0	0	0	0	0	0	0	0	0	0	0	0	0	0	0.333333	0	0	0	0.333333	0.333333	0	0	0	0	0	0	0	0	0	0	0	0	0	0	0	0	0	0	0	0
M00909	0.6	0.8	1	0.4	1	0.6	1	0.4	0.4	1	0.4	0.8	0.8	1	0.8	0.6	0.8	0.8	0.6	0.8	1	1	0.8	0.8	0.8	1	0.8	0.8	0.8	0.6	0.8	0.8	0.8	0.8	0.8	0.8	0.2	0.8	0.8	0.8	1	0.8	0.8	0.8	1	1	0.6	1	0.4
M00911	0.333333	0.333333	0	0	0	0	0	0.333333	0	0.333333	0.333333	0.333333	0	0	0	0	0	0	0.333333	0	0	0	0.333333	0.333333	0.333333	0	0.333333	0	0.333333	0	0	0	0	0.333333	0.333333	0	0	0	0	0	0	0	0	0	0	0	0	0.333333	0.333333
M00912	0.375	0.375	0.25	0	0.25	0.25	0.5	0.375	0.125	0.375	0.5	0.375	0.25	0.375	0.25	0.125	0	0.25	0.375	0.375	0.25	0.375	0.5	0.5	0.375	0.375	0.375	0.25	0.375	0.375	0.25	0	0	0.375	0.25	0	0	0.125	0.25	0.25	0.125	0.25	0.25	0.25	0.375	0.375	0.375	0.25	0.375
M00913	0.6	0.4	0	0	0.2	0.2	0.2	0.6	0	0	0.4	0.4	0	0	0	0	0	0	0	0.2	0.2	0	0.2	0.2	0.4	0	0.2	0.2	0.6	0	0	0	0	0.6	0	0	0	0	0	0.2	0	0.2	0.2	0	0.2	0.2	0	0.2	0.4
M00914	0.428571	0.142857	0	0	0.142857	0.142857	0.142857	0.428571	0	0.142857	0.285714	0.142857	0.142857	0	0	0	0.142857	0	0	0.285714	0.142857	0	0.285714	0.285714	0.285714	0	0.142857	0.285714	0.428571	0.142857	0	0	0	0.428571	0	0	0	0	0	0.142857	0	0.285714	0.142857	0	0.142857	0.142857	0	0.285714	0.142857
M00916	0	0	0	0	0	0	0	0	0	1	0	1	0	0	0	0	0	0	0	0	0	0	1	1	1	0	0	0	1	0	0	0	0	0	1	0	0	0	0	1	0	0	0	0	0	0	0	0	0
M00918	0	0	0	0	0	0	0	0	0	0	0	0	0	0	0	0	0	0	0	0	0	0	0	0	0	0	0	0	0	0	0	0	0	0	0	0	0	0	0	0	0	0	0	0	0	0	0	0	0
M00919	0	0	0	0	0	0	0	0	0	0	0	0	0	0	0	0	0	0	0	0	0	0	0	0	0	0	0	0	0	0	0	0	0	0	0	0	0	0	0	0	0	0	0	0	0	0	0	0	0
M00921	0.25	0	0	0	0	0	0	0.25	0	0	0	0	0	0	0	0	0	0	0	0	0	0	0	0	0	0	0	0	0	0	0	0	0	0	0	0	0	0	0	0	0	0	0	0	0	0	0	0	0
M00922	0	0	0	0	0	0	0	0	0	0	0	0	0	0	0	0	0	0	0	0	0	0	0	0	0	0	0	0	0.333333	0	0.333333	0	0	0	0	0	0	0	0	0	0	0	0	0	0	0	0	0	0
M00923	0	0	0	0	0	0	0.75	0	0	0	0	0	0.75	0	0	0.25	0	0	0	0.75	0	0	0	0	0.25	0	0	0	0	0	0.75	0	0	0	0	0	0.75	0	0	0.25	0	0.75	0	0	0	0	0.75	0	0
M00924	0	1	0	0	0.909091	0	0	0.0909091	0	0.909091	0	0.818182	0.909091	0	0	0	0.272727	0.818182	0.818182	0.818182	0	0	0.818182	0.0909091	0.0909091	0	0	0.0909091	1	0	0.818182	0	0	0	1	0	0	0	0	0.909091	0	0.818182	0.909091	0	0	0	0.0909091	0.909091	0
M00925	0	0.727273	0	0	0.636364	0	0	0.0909091	0	0.727273	0	0.545455	0.636364	0	0	0	0.181818	0.545455	0.636364	0.545455	0	0	0.636364	0.0909091	0.0909091	0	0	0.0909091	0.727273	0	0.545455	0	0	0	0.727273	0	0	0	0	0.636364	0	0.636364	0.636364	0	0	0	0	0.636364	0
M00926	0.222222	0.555556	0	0	0.111111	0	0.111111	0.111111	0	0.555556	0.222222	0.555556	0	0.111111	0	0	0	0	0.222222	0.222222	0	0.111111	0	0	0.555556	0.111111	0	0	0.555556	0	0	0	0	0.777778	0.555556	0	0	0	0	0	0	0.222222	0	0	0.111111	0	0	0	0
M00930	0	0	0	0	0	0	0	0	0	0	0	0	0	0	0	0	0	0	0	0	0	0	0	0	0	0	0	0	0	0	0	0	0	0	0	0	0	0.166667	0	0	0	0	0	0	0	0	0	0	0
M00931	0	0	0	0	0	0	0	0	0	0	0	0	0	0	0	0	0	0	0	0	0	0	0	0	0	0	0	0	0	0	0	0	0	0	0	0	0	0.2	0	0	0	0	0	0	0	0	0	0	0
M00932	0.428571	0	0	0	0	0	0	0.428571	0	0	0	0	0	0	0	0	0	0	0	0	0	0	0	0	0	0	0	0	0	0	0	0	0	0.428571	0	0	0	0	0	0	0	0.142857	0	0	0	0	0	0	0
M00935	0.166667	0	0	0	0	0	0	0	0	0	0	0	0	0	0	0	0	0	0	0	0	0	0	0	0	0	0	0	0	0	0	0	0	0	0	0	0	0	0	0	0	0	0	0	0	0	0	0	0
M00936	0	0	0	0	0	0	0	0	0	0	0	0	0	0	0	0	0.25	0	0	0	0	0	0	0	0.25	0	0	0	0	0	0	0	0	0	0	0	0	0	0	0	0	0	0	0	0	0	0	0	0
[truncated: 289 more columns]

## Sheet: c) Genome detection x samples
bins	AST0002	AST0003	AST0005	AST0008	AST0009	AST0011	AST0013	AST0015	AST0017	AST0018	AST0019	AST0022	AST0023	AST0024	AST0025	AST0026	AST0029	AST0030	AST0031	AST0032	AST0033	AST0034	AST0035	AST0037	AST0038	AST0040	AST0042	AST0044	AST0045	AST0049	AST0050	AST0051	AST0055	AST0056	AST0057	AST0058	AST0060	AST0061	AST0064	AST0066	AST0067	AST0068	AST0069	AST0070	AST0071	AST0072	AST0073	AST0074	AST0075
GCA_000210075_1	0.39746	0.0876515	0.0271692	0.00568025	0.0640918	0.350189	0.260037	0.0269041	0.0426119	0.0865258	0.410519	0.193956	0.0188578	0.54864	0.213712	0.117351	0.730378	0.281209	0.546203	0.0929273	0.039147	0.0169102	0.0910488	0.536389	0.119824	0.500451	0.0652765	0.205622	0.672714	0.257321	0.102089	0.00481029	0.139755	0.00505744	0.00802507	0.00385633	0.095996	0.276594	0.509454	0.184899	0.0850441	0.763376	0.253697	0.825729	0.225296	0.80343	0.784438	0.241092	0.0883643
GCA_000210555_1	0.811755	0.771087	0.761555	0.0749816	0.0952785	0.739961	0.707503	0.790426	0.762739	0.789813	0.803376	0.756946	0.772978	0.633223	0.752165	0.238152	0.716886	0.226712	0.740166	0.563211	0.0865758	0.736964	0.711652	0.701485	0.786732	0.671342	0.707935	0.658102	0.0546433	0.727789	0.237418	0.760121	0.69925	0.201255	0.0352014	0.527709	0.10951	0.769069	0.71462	0.100005	0.654493	0.0863544	0.744761	0.535392	0.721993	0.548824	0.116265	0.599969	0.744016
GCA_000431575_1	0.40518	0.934498	0.0418664	0.00252348	0.671053	0.40429	0.624436	0.411848	0.135065	0.776224	0.421486	0.90052	0.952594	0.665364	0.659432	0.275502	0.676985	0.441342	0.134085	0.483517	0.00446523	0.177029	0.0264057	0.0714275	0.0109959	0.907966	0.111738	0.236015	0.00372148	0.613819	0.00286808	0.0256733	0.958075	0.241065	0.0017041	0.00369933	0.0596798	0.935727	0.591069	0.0084827	0.0137792	0.941329	0.396631	0.944639	0.8405	0.932156	0.655179	0.951789	0.266027
GCA_000431795_1	0.925875	0.00069728	0.332761	0.00109711	0.00271818	0.0829941	0.682005	0.829877	0.00535576	0.000768218	0.116031	0.016297	0.00804976	0.0129815	0.752104	0.0104616	0.00448597	0.0925529	0.00106245	0.0460028	0.00756045	0.00120513	0.00166299	0.315026	0.00616106	0.00762333	0.403345	0.0237446	0.00104794	0.225572	0.000917347	0.00620459	0.0138166	0.000865756	0.00143809	0.000781115	0.925246	0.880977	0.916272	0.0390695	0.907755	0.00717191	0.0586304	0.684474	0.0609052	0.00125914	0.41104	0.830457	0.0131
GCA_000432135_1	0.371977	0.01203	0.074677	0.00676977	0.115297	0.86298	0.668183	0.0230039	0.0071686	0.00998449	0.221476	0.654922	0.617366	0.916586	0.930468	0.175841	0.793922	0.0362505	0.00581164	0.756338	0.00234434	0.0365339	0.00657846	0.0584927	0.012802	0.369037	0.327446	0.023579	0.00170242	0.498822	0.00148503	0.615514	0.969792	0.00224315	0.016789	0.00361829	0.0434195	0.979369	0.925536	0.010573	0.00721959	0.0161068	0.884895	0.923249	0.955311	0.0109134	0.137794	0.856342	0.807459
GCA_000432375_1	0.522992	0.018408	0.0148535	0.00351712	0.0256692	0.676824	0.257637	0.0169645	0.00674906	0.00939251	0.386792	0.0114111	0.910512	0.666045	0.431722	0.0141192	0.899685	0.659514	0.00605536	0.868708	0.405606	0.693791	0.00553682	0.0298709	0.00751273	0.510879	0.397575	0.088093	0.00566018	0.254243	0.00197804	0.327729	0.402847	0.0459223	0.0194056	0.00190328	0.0265957	0.907414	0.649525	0.00719925	0.0363781	0.904284	0.887544	0.617178	0.905062	0.906878	0.0935951	0.883182	0.872637
GCA_000432435_1	0.949043	0.00543737	0.0192392	0.00737337	0.0313625	0.411793	0.935272	0.0143469	0.983608	0.99604	0.018624	0.943953	0.987399	0.0255364	0.998565	0.931115	0.929325	0.984321	0.00356731	0.870763	0.0292063	0.00410382	0.00369173	0.0394191	0.0180508	0.995987	0.933331	0.857811	0.000771526	0.94505	0.00258576	0.013972	0.947674	0.0112363	0.0203266	0.00745259	0.940759	0.942109	0.598813	0.0317368	0.0118313	0.106241	0.939745	0.0973144	0.939722	0.994028	0.995426	0.00754245	0.0105483
GCA_000432735_1	0.00546523	0.0102451	0.001656	0.000198778	0.000256289	0.00615328	0.35136	0.000767096	0.00167192	0.00146488	0.024082	0.0247904	0.000940511	0.0104311	0.00624441	0.00427787	0.00420236	0.00689826	0.00367386	0.00283009	8.67075e-05	0.000610197	0.0123352	0.00191022	0.0256061	0.00377119	0.00208363	0.00379036	0.00475623	0.00214468	5.54456e-05	0.000583064	0.109101	6.96019e-05	0	8.58227e-05	0.00561151	0.00196773	0.0056292	0.00160143	0.0052517	0.00413247	0.00143834	0.0019925	0.00535139	0.0271922	0.00174388	0.0301421	0.00246645
GCA_000433035_1	0.00261763	0.000648728	0.000524962	0.000804184	0.000459192	0.0127115	0.0212	0.000113602	0.000280418	0.000364723	0.000496262	0.000894468	0.0121937	0.000660686	0.000420328	0.000243348	0.000255904	0.000300747	0.000176382	0	0.000414947	0.000246935	0.000506427	0.0521291	0.0001142	0.00031689	0.0215222	0.00100807	0.000782061	0.0160759	0.000781463	0.0016568	0.000555455	0.000208669	0	2.51121e-05	7.6532e-05	0.00798384	0.0133495	0.000507025	0.0104012	0.000374887	0.00029417	0.293127	0.000230194	0.000117788	0.0529105	0.000547084	0.000315097
GCA_000433635_1	0.00308389	0.00557971	0.409091	0.000667914	0.00707074	0.875847	0.431623	0.00214325	0.00133493	0.00095051	0.344392	0.013505	0.0114716	0.909843	0.00850749	0.00356116	0.750236	0.00160183	0.00719364	0.679647	0.0017678	0.632296	0.000861246	0.00246576	0.000536036	0.00520112	0.481999	0.00332297	0.00074731	0.116248	0.00118376	0.357779	0.197248	0.0443555	0.00486783	0.000477722	0.0160842	0.0124921	0.00602917	0.00176959	0.0143205	0.00250165	0.0662226	0.0183952	0.923583	0.000996712	0.00908524	0.531127	0.0114039
GCA_000434235_1	0.0061506	0.00863191	0.00324603	0.0034033	0.0161405	0.00311453	0.0128388	0.000865955	0.00357702	0.000409069	0.00469999	0.0146316	0.0977181	0.0171133	0.0752152	0.00198594	0.00525999	0.0037186	0.00226015	0.0326583	0.000535338	0.00272899	0.00119956	0.00748054	0.00808723	0.00934955	0.00573892	0.00532238	0.00850228	0.0243913	0.000481169	0.0147777	0.00785972	0.000451283	7.17271e-05	0.00038105	0.0969205	0.0136752	0.0166683	0.000635457	0.00260982	0.0165918	0.00852693	0.182388	0.091031	0.00762101	0.132936	0.0146364	0.685879
GCA_000434275_1	0.0163839	0.711863	0.568721	0.00510592	0.00672036	0.016417	0.0304886	0.012596	0.00870121	0.0102553	0.515568	0.944737	0.468132	0.918771	0.0292091	0.00964627	0.919257	0.0106198	0.296907	0.0223941	0.00274981	0.00681994	0.0170433	0.00443769	0.0228121	0.652392	0.0144038	0.00789726	0.0022869	0.0307547	0.00149986	0.463726	0.0377669	0.00272598	0.000903532	0.00929254	0.0236456	0.395384	0.014984	0.00683532	0.0161571	0.217753	0.0141374	0.0252301	0.0221642	0.0193006	0.0183029	0.022057	0.0255427
GCA_000434635_1	0.73982	0.0103187	0.383448	0.00396846	0.0118116	0.819964	0.706645	0.311408	0.00686639	0.00908594	0.762179	0.229142	0.909815	0.869433	0.842848	0.278116	0.00949257	0.0280803	0.0053063	0.486909	0.00409487	0.0959108	0.00869018	0.0280127	0.00761563	0.898873	0.425645	0.0704144	0.00208427	0.120928	0.00145742	0.370241	0.881926	0.00326752	0.00312541	0.00393907	0.0295019	0.884393	0.818574	0.0177729	0.0119907	0.0131478	0.272122	0.738325	0.850612	0.0118152	0.0693958	0.782077	0.0206636
GCA_000434995_1	0.00938225	0.0255491	0.0268842	0.00168333	0.00125846	0.00959382	0.0658291	0.0101363	0.0147458	0.00256189	0.0284004	0.01754	0.00855096	0.0373163	0.00465163	0.00587205	0.0132914	0.0664229	0.00421639	0.0068169	0.0025002	0.00981057	0.00785226	0.00279997	0.015041	0.0423495	0.0214544	0.00942491	0	0.0199474	0.000937937	0.0187766	0.895328	0.00263395	0.00179574	0.0181298	0.0101726	0.0169947	0.0293793	0.00315682	0.00134436	0.032788	0.00639261	0.0388532	0.00686417	0.0107837	0.0252009	0.96136	0.00874696
GCA_000435055_1	0.0141462	0.0139295	0.00661125	0.00137694	0.150734	0.91349	0.934985	0.00396523	0.0029995	0.0048155	0.113508	0.00370949	0.923036	0.0172632	0.597152	0.0156832	0.00363606	0.156603	0.00205402	0.314023	0.00377583	0.00475777	0.00503225	0.366468	0.00376874	0.00940109	0.701105	0.0349447	0.00172485	0.743842	0.000621371	0.0270243	0.012037	0.000627448	0.0136398	0.000827482	0.00609015	0.921851	0.909689	0.0136459	0.0163476	0.852914	0.91891	0.452029	0.726427	0.0100361	0.51454	0.0527436	0.00691206
GCA_000435175_1	0.0323301	0.00595843	0.843637	0.000410711	0.00200491	0.00415645	0.768682	0.15577	0.00108133	0.00139475	0.347907	0.0107063	0.124841	0.0444325	0.982418	0.0107653	0.00298478	0.0500032	0.000626143	0.00554077	0.000136209	0.371056	0.0153478	0.00148579	0.00338854	0.84051	0.00195001	0.0242278	0	0.0153374	0.000528156	0.00946789	0.610385	0.000799183	0.00588824	0.000273112	0.967223	0.896263	0.957068	0.0127383	0.00146772	0.0188566	0.82813	0.00449905	0.0103317	0.00132386	0.00225717	0.901679	0.00278533
GCA_000435195_1	0.00892997	0.379851	0.00319748	0.00571771	0.0205522	0.00848537	0.00886885	0.00529824	0.126316	0.0380459	0.00630426	0.0219387	0.948722	0.0246256	0.948795	0.00358047	0.737316	0.131138	0.00467866	0.44093	0.00966933	0.00460177	0.0287739	0.00617857	0.0173843	0.0172916	0.0103964	0.310137	0.00814773	0.0541166	0.016256	0.888056	0.121875	0.0136106	0.00200218	0.00333451	0.900749	0.370308	0.0265814	0.00342816	0.0109558	0.0153501	0.93276	0.0782847	0.839255	0.718711	0.0388129	0.034389	0.800049
GCA_000435555_1	0.964043	0.00731048	0.826063	0.00691404	0.0163882	0.985827	0.961683	0.0293018	0.00516946	0.0328426	0.987219	0.805017	0.949165	0.973306	0.96101	0.155433	0.00843424	0.0533692	0.0012473	0.871093	0.00159836	0.106999	0.00426313	0.067859	0.0578498	0.988345	0.703415	0.0292167	0.00280658	0.713471	0.00280595	0.90736	0.850168	0.0186868	0.0101101	0.00279839	0.363378	0.988962	0.980048	0.0276146	0.0178416	0.0144905	0.0285618	0.991345	0.956597	0.00942881	0.93176	0.965422	0.942417
GCA_000435655_1	0.00383452	0.0105723	0.00208911	0.0282846	0.00792249	0.00325173	0.003738	0.00259343	0.00403897	0.00540863	0.00287672	0.00525059	0.0132678	0.00764988	0.00760973	0.00263543	0.00286272	0.01264	0.00330994	0.114303	0.00449872	0.00283399	0.00702252	0.0143777	0.00466007	0.00834208	0.00224862	0.00304544	0.0241067	0.00535153	0.00304433	0.00542447	0.00233188	0.00123593	0.00138476	0.0003216	0.434674	0.00386215	0.00871341	0.00266821	0.113074	0.0174165	0.038715	0.00595863	0.0070612	0.206345	0.0184399	0.00700189	0.00670092
GCA_000435795_1	0.0519379	0.870076	0.590746	0.0146437	0.171353	0.00918215	0.00887635	0.0339374	0.0390095	0.0137797	0.0260287	0.503408	0.755584	0.0114159	0.836337	0.0084303	0.00580673	0.052095	0.671735	0.518638	0.101973	0.00493291	0.465629	0.760115	0.317744	0.0100054	0.00584926	0.306641	0.0666347	0.0163348	0.0110897	0.0176205	0.00775753	0.00186153	0.0029227	0.00447174	0.175418	0.592876	0.899642	0.00241373	0.00772379	0.098597	0.248436	0.0353363	0.845842	0.0168968	0.0792077	0.00849919	0.16821
GCA_000435975_1	0.298064	0.0492368	0.0623731	0.00379577	0.0596073	0.321541	0.666144	0.0274495	0.00843606	0.0684656	0.133859	0.0945594	0.325199	0.921005	0.0865293	0.0810145	0.0291111	0.0463419	0.00451783	0.130547	0.00336081	0.0578883	0.0063588	0.0329119	0.0302315	0.123337	0.824421	0.0570448	0.00243397	0.581617	0.0170733	0.044564	0.900952	0.0132024	0.00432372	0.00346142	0.0213955	0.919845	0.365563	0.0151501	0.0404567	0.0480467	0.911789	0.307811	0.242023	0.0305318	0.128427	0.900306	0.731966
GCA_000436335_1	0.00785294	0.00754723	0.01024	0.00354763	0.676964	0.0190814	0.937147	0.00803721	0.0183021	0.00368491	0.919926	0.015953	0.980698	0.934142	0.0211702	0.664612	0.0112591	0.396307	0.944792	0.84879	0.77133	0.930484	0.978172	0.0117855	0.0465083	0.930005	0.0595473	0.685044	0.00697541	0.0114249	0.00254602	0.927572	0.916586	0.902079	0.00625416	0.00507619	0.361874	0.0141821	0.928988	0.0159678	0.0143025	0.931318	0.00870989	0.839274	0.925878	0.739784	0.0133294	0.0110637	0.90843
GCA_000436475_1	0.0266552	0.0128328	0.0119006	0.00330408	0.00417436	0.0135784	0.0174461	0.105782	0.00664257	0.0045292	0.022113	0.0132714	0.0248561	0.045006	0.00969887	0.0109007	0.0253895	0.00968855	0.00989809	0.0476803	0.00195507	0.0212668	0.00956275	0.790539	0.00931803	0.309751	0.402299	0.019743	0.000822865	0.0221023	0.0022472	0.0730954	0.884618	0.0248664	0.00118497	0.00371666	0.00380996	0.0150911	0.422237	0.00821489	0.00778166	0.0113274	0.708635	0.0515457	0.0559342	0.0237736	0.00795755	0.0161996	0.00609616
GCA_000436535_1	0.415424	0.139813	0.210328	0.00150547	0.001313	0.0070851	0.00710067	0.00473897	0.0050574	0.00310365	0.340236	0.199669	0.0117183	0.671946	0.0459649	0.186816	0.0750246	0.00150123	0.00206804	0.0104502	0.0020928	0.414547	0.00396907	0.0250747	0.0230792	0.0160115	0.00996903	0.00605834	0.00071081	0.00437702	0.00111522	0.00416686	0.0400584	0.00183664	0.000565039	0.00123127	0.00253365	0.165092	0.0122826	0.00180409	0.00262282	0.00297415	0.027948	0.0196522	0.0145307	0.00555769	0.0025754	0.00524386	0.00224388
GCA_000436755_1	0.0106932	0.640491	0.0044057	0.052792	0.000685084	0.00669266	0.00231576	0.00480114	0.00381739	0.00537002	0.0990576	0.00845445	0.00812665	0.014563	0.17404	0.00150129	0.00273236	0.00169068	0.00192136	0.0122528	0.00156026	0.00280728	0.00256031	0.00108954	0.00236779	0.0048667	0.0194487	0.00164906	0.00113152	0.0405195	0.000490138	0.00427423	0.0751573	0.000794697	0.000396828	0.000876214	0.00266506	0.00792512	0.0159543	0.0015665	0.00232339	0.00204415	0.00892101	0.764117	0.0134304	0.00205421	0.00811521	0.0933095	0.00258632
GCA_000436835_1	0.00583303	0.926703	0.924705	0.00352969	0.00753043	0.970259	0.0300206	0.00782431	0.956793	0.00109734	0.92621	0.0336006	0.0150234	0.0577667	0.00746352	0.0424676	0.030642	0.00797097	0.00611674	0.00748172	0.00140941	0.0056778	0.0466241	0.00143832	0.993346	0.985944	0.93353	0.0219045	0.00112089	0.132897	0.00447554	0.9056	0.0225244	0.00285255	0.166693	0.928795	0.953812	0.99401	0.0955569	0.260472	0.015472	0.00777024	0.0122833	0.928342	0.0265176	0.00358215	0.963742	0.0445568	0.00977704
GCA_000436875_1	0.0115632	0.0209101	0.00748	0.0065296	0.00585156	0.080839	0.0504825	0.00446248	0.0034254	0.00503492	0.0348674	0.0289076	0.170751	0.0783957	0.0266108	0.0289459	0.0125497	0.0300837	0.00236588	0.159534	0.00879648	0.0115874	0.00283404	0.00796268	0.0126927	0.0892932	0.00973193	0.0149961	0.00484	0.0922271	0.00499312	0.0362327	0.0171318	0.00068376	0.00012452	0.00124916	0.0446327	0.0336266	0.0401359	0.0021098	0.0164921	0.0608107	0.516985	0.208972	0.345116	0.315451	0.888719	0.15668	0.344329
GCA_000437595_1	0.00439748	0.00368755	0.228284	0.000855762	0.00636456	0.926039	0.693388	0.441714	0.0019461	0.00176965	0.911297	0.00317402	0.902005	0.956761	0.930236	0.275023	0.00753986	0.176651	0.00255009	0.503673	0.00146869	0.91906	0.00915989	0.110266	0.00126438	0.918709	0.826217	0.186863	0.00246788	0.835728	0.00230622	0.0650916	0.919665	0.00324901	0.0130944	0.00254355	0.0522992	0.909988	0.956471	0.0161037	0.00724543	0.905816	0.880082	0.93032	0.878809	0.0136905	0.283945	0.928746	0.0261217
GCA_000437735_1	0.019151	0.549723	0.273703	0.00356158	0.00752969	0.0138574	0.0275411	0.215278	0.152703	0.138569	0.0986947	0.27086	0.769605	0.206505	0.176107	0.0652009	0.219162	0.120682	0.0862607	0.122447	0.0229634	0.00565249	0.00617706	0.0155213	0.0120158	0.0195715	0.65228	0.0200711	0.0514436	0.230161	0.00136877	0.0405308	0.0483772	0.00317339	0.00139736	0.0106338	0.0144289	0.109426	0.0637878	0.00674964	0.0179366	0.00631672	0.0507812	0.128308	0.0102892	0.874661	0.795003	0.688206	0.0559538
GCA_000437915_1	0.000149191	0.015612	0.000112059	0.000120016	0	0.0020217	0.250951	0.000247989	4.70781e-05	0.000116701	0.000672354	0.000155822	0.00198789	0.000418398	0.000197595	0.000123331	4.24366e-05	0.00643776	5.50349e-05	0.000496641	0.000356069	0.000246	0.000438953	0.000255946	5.96764e-05	0.000186323	0.00387897	0.00216692	0.000155822	0.000246663	6.43179e-05	0.000279153	0.000186323	0.00026987	0	0	0.000468128	0.000743303	0.643521	0.000544382	5.90134e-05	0.000940235	0.00617784	0.000499293	0.00288635	0.000190965	0.000909071	0.00163248	0.000669702
GCA_000438155_1	0.436585	0.0100079	0.0141743	0.00718179	0.0402111	0.758741	0.506808	0.32805	0.00895361	0.00928739	0.740384	0.00492488	0.194793	0.664731	0.219319	0.0253322	0.00580089	0.0316925	0.00597037	0.0492663	0.00367872	0.017529	0.00661391	0.0101696	0.00967897	0.0338449	0.0395844	0.0155068	0.00308194	0.19392	0.00132311	0.00735874	0.0201135	0.00244231	0.00210203	0.00608207	0.00969553	0.275113	0.870292	0.00594927	0.00545055	0.00540152	0.0119674	0.131421	0.16012	0.00446674	0.00580089	0.249501	0.00495864
GCA_000438255_1	0.237201	0.0342744	0.930993	8.62042e-05	0.000360553	0.0175084	0.193503	0.0575475	0	0.000227141	0.0690133	0.0491549	0.0594344	0.124969	0.079091	0.0983358	0.000974929	0.0041727	0.000196354	0.0305738	0.000254508	0.0145829	0.0430015	0.000268875	0.00366915	0.0119366	0.00136011	0.00236856	6.70477e-05	0.025199	0.000384498	0.0112633	0.134269	0.000394077	0.0244786	0.000265454	0.0591881	0.122142	0.15473	0.00483496	0.000262718	0.0142011	0.00311019	0.0159081	0.076026	0.000197038	0.00139158	0.0321514	0.000213458
GCA_000438355_1	0.0442692	0.906827	0.046905	0.000146937	0.001162	0.00376038	0.150845	0.104057	0.000308867	0.000319362	0.0425884	0.0209535	0.0290777	0.0489479	0.901034	0.0935919	0.00134267	0.514115	0.000178423	0.206946	0.000133442	0.0117085	0.0227647	0.00178348	0.85689	0.768778	0.00273482	0.0372837	7.34683e-05	0.0293266	0.000497785	0.0112519	0.0190575	0.000614735	0.0118951	0.000363593	0.237082	0.0636978	0.084026	0.00758898	0.000240646	0.655131	0.00330832	0.0101356	0.502651	0.233154	0.205112	0.631426	0.00109828
GCA_000980495_1	0.00319372	0.166307	0.00117385	0.00177434	0.0629633	0.000469073	0.000584587	0.000271716	0.000840403	0.000207178	0.000341867	0.0016331	0.000175844	0.0169708	0.00097556	0.0107494	0.000136092	0.0199012	0.339683	0.00413748	0.00184168	0.000432127	0.00261474	0.00181643	0.00079878	0.000316145	0.000400793	0.00354634	0.000323628	0.01064	0.000286682	9.30663e-05	0.0213753	0.00027499	0.00024693	0.000129545	0.191764	0.00637621	0.0182424	0.144279	0.000246462	0.00106301	0.00197403	0.285601	0.0135264	0.00916025	0.102921	0.00873046	0.000298373
GCA_000980705_1	0.0357901	0.825749	0.0346709	0.0118116	0.0132184	0.106368	0.0326811	0.0705787	0.0228733	0.0158928	0.369518	0.048312	0.059145	0.544465	0.679633	0.0913122	0.0455261	0.0881932	0.140302	0.208304	0.00911398	0.0516111	0.0186082	0.0137659	0.0152537	0.0751509	0.0419295	0.215481	0.00986866	0.0970285	0.00857233	0.825834	0.092113	0.0162983	0.00605661	0.0156599	0.0361981	0.110239	0.0479926	0.0043496	0.0847737	0.0328863	0.34896	0.121828	0.490821	0.0181784	0.0323642	0.777089	0.12679
GCA_001916065_1	0.590981	0.0252104	0.760418	0.000362421	0.000559928	0.0109163	0.0743792	0.276319	0.000124501	0.000421087	0.435405	0.889177	0.885994	0.126217	0.175765	0.237897	0.00046476	0.0025187	6.32282e-05	0.0259444	0.000246394	0.0161506	0.0337508	0.000596431	0.0092085	0.0113394	0.00354925	0.00275727	0.00019164	0.0318318	0.000370243	0.0255422	0.825441	0.000331785	0.0169113	0	0.0533235	0.29451	0.0876695	0.00974235	0.000518862	0.01169	0.00394818	0.0168761	0.0605641	0.000505825	0.00173258	0.0167828	0.000212499
GCA_001916775_1	0.705754	0.00856074	0.412025	0.00433678	0.0425909	0.695426	0.60501	0.0355197	0.0050698	0.00723176	0.377393	0.14101	0.0938296	0.0317069	0.101212	0.10404	0.00651918	0.00577329	0.0022445	0.670248	0.00987836	0.017335	0.000996544	0.418083	0.00377263	0.00633214	0.666986	0.0196159	0.000596715	0.350902	0.00316834	0.00750513	0.10108	0.00105334	0.00428453	0.000791329	0.0277434	0.0917987	0.175851	0.183672	0.0287241	0.00228009	0.652739	0.690627	0.697378	0.00028927	0.521907	0.0213538	0.0180317
GCA_001916835_1	0.168118	0.209348	0.115941	0.00453879	0.0494905	0.88117	0.769669	0.0508031	0.00535248	0.00822702	0.758624	0.332363	0.933557	0.904204	0.588846	0.0359465	0.278588	0.0287072	0.00262948	0.665417	0.00309776	0.0244353	0.0138109	0.0120934	0.300525	0.691911	0.069146	0.0208065	0.00292301	0.035399	0.00080823	0.0528456	0.392123	0.010991	0.00248476	0.00105398	0.357804	0.364674	0.78801	0.00813009	0.0153625	0.310186	0.685423	0.969702	0.902709	0.0365909	0.0509281	0.765688	0.0505403
GCA_001916855_1	0.0522896	0.0332075	0.160873	0.00481702	0.0218878	0.712024	0.525389	0.0140803	0.00876745	0.0190445	0.230508	0.131203	0.937721	0.213472	0.0635489	0.0292389	0.0281664	0.0453897	0.00635072	0.26284	0.00299465	0.143318	0.00800412	0.128028	0.00691222	0.169544	0.127461	0.0397589	0.00409065	0.168268	0.00284797	0.0410127	0.191587	0.00671097	0.00199428	0.00220668	0.0252433	0.215649	0.782097	0.0044509	0.0126504	0.051423	0.220708	0.767732	0.603841	0.0467867	0.3195	0.210967	0.102568
GCA_001916965_1	0.131499	0.0283799	0.0250614	0.00903853	0.0215038	0.733949	0.103024	0.0185795	0.0218055	0.015259	0.0773088	0.0576304	0.0898216	0.48642	0.0868825	0.0643495	0.133612	0.00919577	0.0153294	0.0262275	0.00588863	0.023401	0.0212391	0.0155645	0.0175891	0.343523	0.0512235	0.0111938	0.00743723	0.0308027	0.00328774	0.0149558	0.540878	0.0176505	0.00296806	0.00750875	0.0253909	0.0381542	0.183355	0.00516587	0.0165285	0.0124928	0.0246977	0.0289894	0.034261	0.0134941	0.0237219	0.256677	0.0090646
GCA_001917125_1	8.87662e-05	0.00945605	0.000852265	0.000227634	0.00623705	0.000514082	0.0019888	0.12548	0.00025214	0.000175899	0.000382838	0.000261397	0.000196048	0.602123	0.00314712	0.000226	0.00012961	0.0149557	0.651057	0.228021	0.0993942	0.000487397	0.000530419	5.22795e-05	0.0117275	0.000332193	0.00140447	0.00139466	0.000125253	0.00234114	0.00195504	0.000300607	0.000236891	0.000243971	2.88626e-05	3.8665e-05	0.00301315	0.081635	0.00263848	0.000104559	0.114367	0.00427167	0.572611	0.00331267	0.23013	0.244353	0.0263124	0.0333712	0.0281879
GCA_002160535_1	0.0362109	0.0691293	0.027932	0.344962	0.0186062	0.0327589	0.0277871	0.0187514	0.0215361	0.0390934	0.0447166	0.0833689	0.556003	0.0393533	0.136605	0.0388052	0.0298325	0.056976	0.0264746	0.0443205	0.0399335	0.0550907	0.376526	0.0379654	0.0326956	0.153196	0.024452	0.0502245	0.0650091	0.0384317	0.0217383	0.048858	0.0292806	0.00570061	0.00824014	0.0112139	0.115704	0.0540949	0.0664047	0.0696642	0.0348553	0.386434	0.098113	0.0523455	0.0556523	0.145259	0.206249	0.0383299	0.0544006
GCA_002404795_1	0.134375	0.0443317	0.125748	0.00190824	0.00454467	0.76092	0.681026	0.0105321	0.00299508	0.00658473	0.240127	0.0135545	0.800433	0.602286	0.764944	0.224005	0.0174305	0.0295036	0.00143868	0.269544	0.00186733	0.0186033	0.00162732	0.0742375	0.00280053	0.233947	0.108557	0.0118008	0.00235098	0.0933067	0.0018646	0.0382088	0.770504	0.00373829	0.00195369	0.00206506	0.0189864	0.781649	0.773571	0.00684201	0.00409602	0.00960482	0.0621695	0.791382	0.580339	0.00540015	0.199942	0.758349	0.3077
GCA_002437735_1	0.0883976	0.00302279	0.0183542	0.000951945	0.0092599	0.437104	0.464056	0.0185934	0.00171098	0.00387022	0.386997	0.0156156	0.349341	0.341454	0.29135	0.0198007	0.00737144	0.00584145	0.00110277	0.178668	0.00194458	0.00709154	0.0302279	0.00145282	0.00252613	0.309728	0.0199614	0.00580287	0.00203157	0.0234233	0.00163521	0.0086552	0.186451	0.000813748	0.000296036	0.000904243	0.00782812	0.157999	0.301867	0.00205051	0.00365275	0.00642651	0.412302	0.2806	0.332609	0.00547737	0.012966	0.393646	0.132704
GCA_002438685_1	0.00201433	0.000872209	0.00622742	0.00159747	0.0323112	0.541793	0.38086	0.00196684	0.00128907	0.00147951	0.00218227	0.000987671	0.00744852	0.00375775	0.00281006	0.00530573	0.000830723	0.00176041	0.00255865	0.00243769	0.000567311	0.000888704	0.00192086	0.00423509	0.000494835	0.00161296	0.025629	0.00254765	0.00115711	0.00579507	0.000437354	0.1987	0.00430057	0.000226924	0.00137654	0.000254915	0.0015065	0.00225025	0.0430341	0.00146951	0.0239745	0.161618	0.530875	0.508291	0.010424	0.0015035	0.0119345	0.417476	0.261866
GCA_002451755_1	0.00361002	0.00173812	0.00758421	0.00221923	0.0454032	0.637667	0.489811	0.0034703	0.00218553	0.00191203	0.00837697	0.00254574	0.0164854	0.00840224	0.00696289	0.0073226	0.00270677	0.00373538	0.00224648	0.00386073	0.000724382	0.00188577	0.00363727	0.00592041	0.000763525	0.00532485	0.0451882	0.00616716	0.00143687	0.00801627	0.000383497	0.247131	0.00696636	0.000336427	0.00276821	9.61219e-05	0.00338309	0.00867079	0.0637263	0.0033717	0.0341892	0.23797	0.624219	0.600203	0.0170745	0.00219792	0.0150688	0.522002	0.342354
GCA_003149955_1	0.0111283	0.0119742	0.104448	0.0213309	0.00265082	0.0423691	0.0414449	0.23227	0.00238625	0.380469	0.0584741	0.40107	0.651403	0.109391	0.0150641	0.00670484	0.00698015	0.0595078	0.335153	0.0943994	0.457584	0.177298	0.00783169	0.294237	0.209615	0.482312	0.0405217	0.281262	0.0130218	0.587737	0.686242	0.0402797	0.0105393	0.000680104	0.00219537	0.00133923	0.0273736	0.320934	0.104738	0.00429198	0.00818121	0.795628	0.32687	0.0812466	0.374224	0.0232177	0.215264	0.378787	0.457973
GCA_003293635_1	0.626831	0.908238	0.931617	0.74129	0.41701	0.316592	0.754696	0.236652	0.833419	0.101707	0.837862	0.917255	0.283696	0.903441	0.73471	0.91812	0.887864	0.795063	0.700038	0.915748	0.415928	0.898888	0.0543766	0.354058	0.886806	0.819542	0.889209	0.61682	0.133748	0.775548	0.0182135	0.846732	0.877415	0.145414	0.0257628	0.0857367	0.881726	0.817744	0.760481	0.814613	0.60512	0.60016	0.491718	0.929657	0.944187	0.769928	0.915144	0.922704	0.305548
GCA_003343965_1	0.00152249	0.00145202	0.010287	0.00158804	0.00159186	0.158971	0.00729722	0.00828982	0.00115648	0.000701425	0.096382	0.19234	0.24617	0.638461	0.429908	0.00152412	0.000934141	0.00201141	0.000690499	0.220347	0.00110349	0.00825868	0.000983852	0.00203107	0.00178033	0.0830659	0.00176503	0.000900818	0.00197918	0.190328	0.000512412	0.0131714	0.00118051	0.00058616	0.000156236	0	0.0514936	0.161924	0.00848757	0.00111277	0.0171838	0.204244	0.00420691	0.588026	0.570495	0.0015498	0.00789049	0.0811031	0.00766706
GCA_003449675_1	0.134906	0.0884381	0.515398	0.0233135	0.0702328	0.105493	0.087178	0.302481	0.286844	0.0244974	0.433457	0.46326	0.411743	0.417511	0.54437	0.246341	0.497972	0.0692953	0.0597256	0.279486	0.00610108	0.514344	0.00422547	0.0665429	0.0787314	0.208492	0.466001	0.148468	0.00336132	0.332322	0.00117849	0.270283	0.609763	0.107215	0.00182523	0.0316855	0.0717092	0.362338	0.104688	0.0118358	0.391585	0.038245	0.166139	0.348003	0.451032	0.271008	0.0970374	0.51006	0.209817
GCA_003486385_1	0.88265	0.0106377	0.309494	0.00242243	0.00362796	0.0136806	0.0579547	0.00929435	0.00743269	0.00565568	0.136993	0.00807843	0.0107733	0.154261	0.0131101	0.00593396	0.055047	0.00826298	0.00709701	0.00777875	0.00337434	0.00575363	0.00580293	0.0053907	0.00686965	0.0454459	0.0073049	0.00528335	0.00176176	0.0158802	0.00172933	0.00555708	0.05727	0.0607527	0.00248016	0.00331693	0.00696825	0.902155	0.523577	0.00337596	0.00454614	0.00516302	0.0945492	0.544223	0.00814978	0.00619342	0.00608963	0.00760848	0.00460647
GCA_003487665_1	0.117031	0.0223486	0.0886142	0.00855307	0.0114069	0.864542	0.755671	0.0169908	0.00999119	0.0169501	0.801723	0.0605845	0.24463	0.62411	0.168422	0.12022	0.0308417	0.0482944	0.00931937	0.087733	0.0049293	0.0289959	0.0103054	0.0277639	0.0124848	0.205487	0.17663	0.0228148	0.0047205	0.662382	0.00247274	0.083011	0.79117	0.00774552	0.0102559	0.00478366	0.0411341	0.451949	0.852647	0.00479932	0.0153115	0.0361969	0.079182	0.761866	0.157527	0.0222792	0.108566	0.19538	0.120367
GCA_003507655_1	0.920388	0.922626	0.0272405	0.0174899	0.0390934	0.785922	0.745813	0.817728	0.0182738	0.0176584	0.909595	0.701872	0.824984	0.860665	0.738417	0.836802	0.452998	0.0824624	0.406496	0.39614	0.0115255	0.170964	0.0444094	0.12966	0.0273642	0.619649	0.464476	0.0295555	0.00879057	0.906539	0.00782924	0.604456	0.484315	0.0160793	0.00645747	0.0166401	0.889042	0.617212	0.936812	0.0355673	0.0190997	0.889372	0.0344845	0.276342	0.843996	0.00835167	0.745955	0.352883	0.103003
GCA_003512525_1	0.0832909	0.0989021	0.034169	0.077803	0.00146599	0.118841	0.864419	0.00323241	0.00137167	0.00150379	0.8005	0.0690807	0.128508	0.00992285	0.103859	0.0898171	0.0014172	0.0137045	0.000557368	0.00638879	0.006688	0.0122454	0.0087016	0.0217394	0.0498647	0.0946696	0.0500537	0.00388247	0.00038662	0.0554168	0.000998058	0.0246205	0.0941224	0.000650059	0.000483377	0.00172211	0.0220642	0.0452216	0.0506774	0.000884633	0.0106754	0.095494	0.0118734	0.102094	0.0144046	0.0632927	0.0943338	0.0646644	0.0224781
GCA_003514385_1	0.00909741	0.00216019	0.0403585	0.00279523	0.130388	0.851364	0.811038	0.00605192	0.00427072	0.00590726	0.00425529	0.00542219	0.033821	0.00518929	0.00844742	0.0246489	0.0012479	0.00797102	0.00719422	0.0103038	0.00208063	0.00176914	0.00975511	0.0232245	0.00109842	0.00306381	0.106134	0.0161233	0.00180386	0.0229564	0.000810073	0.781366	0.00387485	0.000327405	0.00778201	0.000425771	0.00264527	0.0173264	0.160519	0.00736733	0.162276	0.547175	0.855086	0.843422	0.0462253	0.0033401	0.050442	0.813546	0.692816
GCA_003516765_1	0.0935722	0.00832801	0.171209	0.0026219	0.00898237	0.849955	0.485138	0.0304644	0.00677774	0.00513589	0.686953	0.345203	0.0635448	0.796663	0.772091	0.111803	0.0184815	0.0259661	0.00371828	0.497715	0.00186112	0.0868939	0.00453351	0.0368779	0.00906008	0.734256	0.0953773	0.0106539	0.00155027	0.0937226	0.000930064	0.204521	0.0838028	0.00825129	0.000857797	0.00166907	0.760241	0.697918	0.765405	0.0021096	0.00788599	0.0175173	0.0572012	0.700099	0.822679	0.00869281	0.128657	0.517897	0.0597736
GCA_003521145_1	0.24944	0.251093	0.175446	0.0945562	0.185078	0.0267563	0.0171014	0.360124	0.0866276	0.311381	0.119778	0.129081	0.0408522	0.241465	0.545758	0.120902	0.10253	0.487813	0.629483	0.630234	0.0448246	0.170188	0.0506001	0.210834	0.39782	0.235483	0.303525	0.18537	0.0677355	0.0316503	0.692463	0.301481	0.319465	0.440935	0.255883	0.247644	0.190583	0.212969	0.383202	0.125543	0.0427633	0.140007	0.0345223	0.0225121	0.0361281	0.327014	0.0344716	0.00926034	0.0167729
GCA_003522105_1	0.124567	0.0270453	0.0810763	0.0073866	0.0170175	0.754675	0.82725	0.0414665	0.042232	0.0173011	0.304575	0.114078	0.872622	0.675636	0.208074	0.185396	0.116494	0.100161	0.0158556	0.143193	0.00477126	0.0840383	0.0156925	0.0136459	0.0248464	0.210839	0.690766	0.054094	0.0149675	0.109703	0.00306058	0.072001	0.400755	0.0251696	0.0184943	0.00317238	0.0311921	0.86863	0.847203	0.00902844	0.0305428	0.129607	0.139662	0.253765	0.212143	0.0434486	0.0954936	0.187205	0.0736956
GCA_003522945_1	0.0978411	0.00614537	0.552028	0.00302595	0.00990498	0.85319	0.706716	0.448335	0.00493836	0.00318409	0.0187975	0.0160775	0.145676	0.806761	0.0377135	0.112837	0.0150406	0.00333409	0.00156351	0.533381	0.00181513	0.183063	0.00164666	0.0205567	0.00876536	0.0220979	0.831151	0.00427806	0.00207056	0.521896	0.0014608	0.0548812	0.755155	0.0187709	0.00196784	0.00142276	0.0111544	0.792739	0.0344897	0.00186459	0.00454272	0.010306	0.857983	0.0563528	0.843381	0.00565843	0.051065	0.879125	0.283784
GCA_003525075_1	0.890979	0.0564871	0.793924	0.00131375	0.00217028	0.0268335	0.105173	0.371481	0.0032219	0.00176	0.097622	0.0616641	0.0543047	0.801092	0.891091	0.0364083	0.00962789	0.015726	0.00399064	0.0201172	0.00139971	0.0151792	0.145262	0.00872869	0.0149542	0.0235708	0.0143099	0.0127035	0.000179231	0.0286862	0.00211237	0.0119768	0.0748968	0.00252021	0.0179231	0.00612313	0.0411049	0.881737	0.164905	0.00785997	0.00217516	0.040299	0.665452	0.825566	0.0325829	0.0020258	0.00509773	0.0502043	0.00413147
GCA_003525905_1	0.597584	0.875552	0.0641705	0.00414562	0.0467009	0.88032	0.588324	0.086662	0.351468	0.118981	0.106242	0.186955	0.498636	0.870822	0.135165	0.069319	0.423115	0.0339259	0.00757494	0.841247	0.00480405	0.0590202	0.0117392	0.0378524	0.0943112	0.930883	0.482714	0.0225494	0.00403353	0.242601	0.00332862	0.0479954	0.160479	0.0155732	0.00222409	0.00242276	0.201544	0.65908	0.217338	0.00409413	0.0242855	0.61123	0.899253	0.640951	0.955512	0.025318	0.874309	0.840366	0.730183
GCA_003526955_1	0.0507248	0.0343418	0.865005	0.0162887	0.0470264	0.019764	0.865382	0.0411248	0.0162548	0.00904169	0.812548	0.0167425	0.0338823	0.836931	0.855793	0.0364717	0.00883824	0.719513	0.018149	0.0397531	0.0165264	0.0167577	0.0396183	0.0092825	0.0295867	0.0392756	0.0259372	0.70998	0.00439766	0.851901	0.0280085	0.848753	0.881972	0.00774879	0.0146298	0.0406568	0.84318	0.870057	0.122371	0.0144712	0.045792	0.0379317	0.0196989	0.838298	0.0259049	0.0250244	0.0451882	0.839743	0.861828
GCA_003531585_1	0.877537	0.00393039	0.241221	0.00289888	0.0168063	0.756778	0.0304003	0.822091	0.00137862	0.000893649	0.255732	0.726118	0.766065	0.945381	0.920639	0.887777	0.0568192	0.00981352	0.000564668	0.706735	0.00160713	0.431326	0.00261674	0.00158674	0.00768968	0.743469	0.00323391	0.00800431	0.00162375	0.568562	0.000712728	0.0630438	0.925377	0.00176312	0.00123207	0.000739168	0.891215	0.183163	0.362249	0.00241995	0.0260386	0.00420838	0.0537726	0.643906	0.958019	0.00334004	0.00590881	0.928058	0.174722
GCA_003538135_1	0.153364	0.00801005	0.0134523	0.00549412	0.0175296	0.185608	0.149234	0.00734031	0.00757328	0.00851583	0.0158663	0.0151086	0.0202623	0.0173198	0.0157135	0.0150924	0.00894195	0.00934491	0.00486189	0.00906006	0.00493692	0.00817355	0.00550292	0.419991	0.0123027	0.014745	0.0232344	0.0131637	0.00685074	0.37356	0.00341958	0.0863366	0.0174041	0.00229547	0.00147983	0.0030282	0.0112967	0.0176792	0.0454731	0.00605965	0.0156908	0.0754776	0.17701	0.166477	0.0181813	0.00938891	0.696273	0.153216	0.104007
GCA_004557245_1	0.0446305	0.0376941	0.058315	0.0164833	0.0370772	0.635356	0.850228	0.021994	0.0143383	0.0167497	0.775364	0.0422925	0.795966	0.369412	0.693456	0.0493331	0.038445	0.0821409	0.00707523	0.230096	0.011833	0.0274074	0.0178142	0.107111	0.0154337	0.060897	0.413518	0.0314773	0.0117447	0.200663	0.00361332	0.483012	0.683026	0.00978242	0.00450684	0.00461479	0.42186	0.786086	0.874268	0.035421	0.0234212	0.0711191	0.772658	0.378054	0.603414	0.0337798	0.245966	0.472412	0.0595399
GCA_007197895_1	0.0279725	0.0539834	0.0670084	0.0049555	0.0191444	0.0282192	0.0158819	0.0190409	0.00302632	0.00953872	0.0335154	0.106733	0.0147651	0.0714955	0.110213	0.0129469	0.0680161	0.0305283	0.0225113	0.025324	0.00724835	0.00225055	0.0718473	0.0760098	0.16053	0.0245415	0.00569911	0.0225645	0.10397	0.0173425	0.00191176	0.00466992	0.022615	0.00480353	0.000603886	0.00116069	0.209716	0.0298779	0.537849	0.0173913	0.0447358	0.0495185	0.0580485	0.0639803	0.0548348	0.0768635	0.0617608	0.0442626	0.0214359
GCA_900066205_1	0.934382	0.40972	0.856171	0.388471	0.281185	0.472133	0.180728	0.825522	0.323159	0.826402	0.253915	0.448589	0.273279	0.766164	0.359341	0.472217	0.292754	0.174502	0.567027	0.250318	0.0880953	0.788428	0.132234	0.206834	0.248733	0.155101	0.545811	0.821835	0.0461715	0.728097	0.0802914	0.507846	0.797418	0.167991	0.0545067	0.389713	0.161624	0.431973	0.530699	0.446751	0.883821	0.192071	0.280734	0.147728	0.227942	0.280883	0.333938	0.34921	0.160839
GCA_900066355_1	0.894659	0.165821	0.863767	0.0885437	0.330731	0.422858	0.779423	0.345855	0.892771	0.840308	0.548991	0.292101	0.439755	0.298693	0.231402	0.486778	0.256571	0.260136	0.861186	0.199402	0.740907	0.880524	0.758245	0.154747	0.673596	0.31844	0.87255	0.849551	0.0592178	0.840012	0.135389	0.628284	0.800941	0.179572	0.0825455	0.618478	0.159987	0.496495	0.266565	0.508448	0.480426	0.121608	0.723172	0.573643	0.271591	0.661001	0.171865	0.333997	0.696592
GCA_900066385_1	0.100027	0.103855	0.226616	0.0528223	0.0399357	0.146724	0.0908505	0.0826068	0.0688574	0.0939292	0.150054	0.102253	0.0958171	0.258919	0.281713	0.0811062	0.0937001	0.062544	0.070371	0.149031	0.0464818	0.133041	0.059814	0.127985	0.0885601	0.241513	0.0863022	0.0687198	0.045867	0.0805136	0.0280945	0.072631	0.0912443	0.0279196	0.018595	0.0418356	0.170539	0.142268	0.0980834	0.0319669	0.0758599	0.0695505	0.147206	0.336602	0.32363	0.196298	0.0781214	0.347724	0.0642858
GCA_900066615_1	0.37529	0.721125	0.813368	0.0938037	0.0894241	0.189609	0.33666	0.158352	0.127464	0.776351	0.390509	0.122545	0.472652	0.774434	0.827352	0.128481	0.843707	0.13727	0.113583	0.773533	0.0940421	0.843624	0.114485	0.116146	0.794627	0.257048	0.511534	0.138375	0.0693195	0.360658	0.0963596	0.738801	0.218015	0.219969	0.0724486	0.784326	0.744993	0.853785	0.827995	0.0822266	0.112621	0.138702	0.644016	0.349546	0.860528	0.0967286	0.100097	0.843515	0.125941
GCA_900066645_1	0.0597284	0.135411	0.0615841	0.0689244	0.0323585	0.156987	0.131969	0.0492846	0.057706	0.0480119	0.134791	0.0828948	0.498237	0.0974809	0.124697	0.0454142	0.0905582	0.13038	0.0686082	0.159942	0.0756275	0.0489622	0.0812636	0.276581	0.0590877	0.104504	0.0411791	0.0664903	0.0995469	0.0692921	0.0472992	0.0610482	0.078377	0.0157994	0.0258592	0.0265687	0.0939076	0.141036	0.136043	0.0253621	0.0414821	0.22116	0.245378	0.156496	0.340963	0.66772	0.51308	0.211454	0.150125
GCA_900112995_1	0.0631393	0.052668	0.0454056	0.0294643	0.0517189	0.156625	0.562529	0.049646	0.0394455	0.0390636	0.0482696	0.0481613	0.687881	0.0760267	0.0487917	0.0435585	0.675048	0.123169	0.0350652	0.89683	0.022443	0.0463139	0.271613	0.347166	0.152018	0.818349	0.0678355	0.145458	0.0180212	0.0972473	0.01661	0.0625803	0.100377	0.0218435	0.00944628	0.0259427	0.0383754	0.07291	0.222573	0.0180798	0.173064	0.362208	0.654756	0.90926	0.913559	0.794006	0.0631191	0.470498	0.103329
GCA_900316325_1	0.14423	0.712519	0.0501091	0.00476159	0.019029	0.0680875	0.394582	0.00906256	0.0082115	0.00708806	0.0131945	0.011546	0.829131	0.0286503	0.318905	0.0430614	0.00765091	0.00494455	0.0276442	0.263693	0.00368342	0.00607478	0.00859516	0.00834278	0.190676	0.392781	0.181936	0.00575714	0.00285462	0.0406316	0.00227441	0.0148412	0.773266	0.00407576	0.00249661	0.00450431	0.0169847	0.65338	0.105996	0.00540064	0.00655728	0.00429192	0.545149	0.834876	0.565516	0.0064939	0.0106142	0.0754249	0.0283058
GCA_900317525_1	0.395749	0.00557536	0.0523416	0.00325332	0.0463635	0.850425	0.850639	0.0705754	0.00501783	0.00607274	0.836389	0.0652496	0.824486	0.828012	0.80157	0.093445	0.016329	0.0244247	0.00372675	0.663143	0.00333018	0.0150474	0.133126	0.00357414	0.00850396	0.817478	0.0474518	0.0160271	0.00484126	0.0909675	0.00367049	0.027913	0.612515	0.0030244	0.0018319	0.00185864	0.0165802	0.597201	0.789447	0.00702407	0.010362	0.0154272	0.824822	0.807452	0.825101	0.0105587	0.0169628	0.835192	0.529792
GCA_900317585_1	0.253128	0.490217	0.489584	0.0345058	0.447534	0.424812	0.0780758	0.596815	0.0309644	0.437031	0.547487	0.480939	0.408668	0.534344	0.488766	0.608704	0.563767	0.375495	0.549504	0.271341	0.0144354	0.514974	0.462895	0.307848	0.576147	0.518133	0.557202	0.434715	0.00660894	0.549013	0.00833887	0.510752	0.581347	0.0713262	0.0143464	0.242291	0.0291268	0.254448	0.540301	0.0374191	0.462713	0.0538047	0.425867	0.573989	0.0312934	0.29047	0.546072	0.462607	0.475118
GCA_900317855_1	0.35386	0.0133476	0.00712225	0.00203785	0.00770982	0.761513	0.0783509	0.00789716	0.00280663	0.00702679	0.183631	0.00383372	0.385482	0.206679	0.0802999	0.00774555	0.331501	0.184173	0.00260193	0.198777	0.694019	0.126821	0.00553822	0.00815649	0.00300623	0.743003	0.252646	0.0325443	0.00309506	0.450644	0.00251004	0.662732	0.648404	0.00663168	0.0026734	0.00184539	0.013808	0.42056	0.811064	0.00365046	0.0265635	0.352051	0.227668	0.822951	0.312236	0.310007	0.0248003	0.285647	0.292591
GCA_900539115_1	0.29291	0.0229574	0.0104297	0.00935963	0.0392541	0.0282924	0.0180382	0.0602994	0.0110293	0.00874622	0.0173762	0.0253216	0.0199827	0.663149	0.73993	0.011104	0.0169826	0.0128699	0.0199894	0.364524	0.00772764	0.00971231	0.0121684	0.0101119	0.010924	0.692263	0.0265241	0.0109335	0.00972288	0.081165	0.00719703	0.126051	0.030066	0.00437699	0.00571936	0.00428503	0.219033	0.574722	0.432661	0.00827269	0.0126539	0.016811	0.0148232	0.495945	0.682758	0.0184927	0.025818	0.0168354	0.0507657
GCA_900539195_1	0.941045	0.365745	0.147863	0.0444713	0.00558229	0.413872	0.071882	0.0152688	0.00323153	0.0121851	0.0864631	0.29548	0.416552	0.0340918	0.372181	0.350727	0.0116484	0.0663498	0.00200628	0.0224406	0.0334828	0.0646872	0.0442573	0.489759	0.222904	0.931417	0.209819	0.0306584	0.0125703	0.864043	0.0046793	0.117839	0.955143	0.0025652	0.00098214	0.00326828	0.111281	0.169401	0.205316	0.00412887	0.0413351	0.374485	0.0491708	0.400502	0.0556432	0.286369	0.3617	0.280516	0.103344
GCA_900539695_1	0.792203	0.922413	0.945679	0.0134341	0.0227394	0.666999	0.454227	0.790157	0.068675	0.546823	0.929793	0.877621	0.541427	0.887478	0.927341	0.825715	0.84528	0.3568	0.862813	0.266277	0.00657196	0.911455	0.0495652	0.0517745	0.0390648	0.850683	0.943099	0.902141	0.00626218	0.817492	0.00687725	0.870242	0.926784	0.823396	0.00200644	0.0474053	0.125593	0.828228	0.916365	0.0195771	0.915553	0.917388	0.218065	0.66021	0.714515	0.707699	0.324767	0.837772	0.783456
GCA_900539885_1	0.380811	0.662569	0.897825	0.0344081	0.0434317	0.862508	0.275387	0.0777303	0.144546	0.280704	0.465114	0.928535	0.625613	0.919877	0.618985	0.502788	0.245741	0.257815	0.440713	0.5801	0.0141214	0.390482	0.0167256	0.0819823	0.910011	0.344296	0.417829	0.417478	0.0108758	0.403276	0.00376061	0.265711	0.657869	0.0375037	0.00278205	0.04084	0.411067	0.831286	0.237024	0.550656	0.345052	0.224716	0.0926154	0.747944	0.901763	0.185404	0.440266	0.513187	0.250528
GCA_900539945_1	0.549388	0.872923	0.919298	0.041515	0.488513	0.872918	0.428126	0.107809	0.755919	0.0414823	0.893693	0.895308	0.883982	0.851266	0.867607	0.908245	0.84922	0.469346	0.804789	0.85183	0.396745	0.882692	0.0160453	0.0762014	0.955069	0.788842	0.819277	0.741299	0.00808056	0.697238	0.00446154	0.259519	0.8963	0.246385	0.00448966	0.0409612	0.866893	0.852887	0.387129	0.026854	0.854961	0.789963	0.340316	0.879833	0.900255	0.878269	0.875545	0.898267	0.421885
GCA_900540595_1	0.11112	0.198486	0.149982	0.0193529	0.024509	0.0798283	0.896805	0.764394	0.141525	0.155756	0.141504	0.884259	0.146608	0.917017	0.11537	0.128473	0.900496	0.243292	0.0475947	0.458277	0.0129834	0.137289	0.0645985	0.122621	0.0975071	0.125008	0.805059	0.247755	0.0189727	0.944115	0.006191	0.697238	0.722391	0.0289043	0.00342266	0.108008	0.235601	0.139843	0.257548	0.0305576	0.853818	0.221467	0.114466	0.317286	0.849654	0.129212	0.15184	0.121398	0.168289
GCA_900540775_1	0.0655385	0.954709	0.0965697	0.0061338	0.0470241	0.14372	0.883792	0.11906	0.79918	0.515253	0.433095	0.937587	0.254516	0.674252	0.058871	0.592416	0.602925	0.274895	0.0327697	0.0720471	0.00251844	0.11111	0.079782	0.0596197	0.0578137	0.215773	0.820414	0.73372	0.00381687	0.346707	0.00462839	0.931782	0.903871	0.0261738	0.00159521	0.529599	0.946447	0.591164	0.573454	0.0115994	0.155134	0.92265	0.677716	0.229054	0.114734	0.11356	0.106208	0.0862231	0.933706
GCA_900540805_1	0.0241363	0.0836476	0.00726552	0.00563021	0.00599794	0.126087	0.00960144	0.00730581	0.0073461	0.00787084	0.0175778	0.0124298	0.0135772	0.102862	0.0152064	0.00773718	0.00784174	0.00598324	0.0067024	0.00879402	0.00746218	0.00823378	0.00740781	0.00224831	0.00611338	0.0308691	0.0126799	0.0066522	0.00670304	0.00655211	0.00337135	0.01571	0.0143277	0.00230587	0.00548631	0.00736017	0.00825617	0.106015	0.0233631	0.00582015	0.00671327	0.00471918	0.239511	0.21627	0.0114171	0.014752	0.0130182	0.0198012	0.0197276
GCA_900541315_1	0.0604554	0.111617	0.305744	0.0137535	0.0608873	0.423506	0.0874148	0.025646	0.437606	0.266959	0.166045	0.259662	0.167642	0.34896	0.113862	0.0362926	0.203012	0.0419713	0.659852	0.629801	0.0200023	0.150481	0.878626	0.169434	0.029112	0.37071	0.0458849	0.13555	0.182703	0.235544	0.0202441	0.021403	0.166733	0.015061	0.00731734	0.0327814	0.253552	0.138868	0.0495759	0.0181661	0.138173	0.0215542	0.101011	0.446856	0.650216	0.333018	0.3807	0.123681	0.0642171
GCA_900541905_1	0.0144281	0.0619087	0.00919788	0.108744	0.0876748	0.00938475	0.0135695	0.0140535	0.0185632	0.0173976	0.0152579	0.0477469	0.148014	0.0118121	0.101014	0.00847882	0.0149348	0.0271556	0.468104	0.10607	0.208694	0.070326	0.0081032	0.109555	0.0276868	0.0173843	0.0101913	0.0189067	0.0197596	0.0131986	0.0238252	0.0637418	0.00751045	0.018023	0.00841401	0.0197771	0.0427825	0.021123	0.117904	0.0232036	0.0265614	0.0622583	0.0309813	0.0963949	0.270216	0.0724818	0.0417696	0.0320268	0.0284125
GCA_900542115_1	0.0452126	0.0305561	0.121242	0.0120213	0.0130931	0.206951	0.161738	0.0264054	0.0178848	0.0177929	0.1758	0.0662053	0.136496	0.238791	0.0877035	0.0315855	0.060323	0.0709814	0.00996152	0.152639	0.00596445	0.0335126	0.00820421	0.0100421	0.0800306	0.216604	0.0492478	0.0215337	0.002878	0.0357974	0.00222686	0.0391359	0.101406	0.0109629	0.00262979	0.00357426	0.0494095	0.103752	0.120478	0.00426247	0.0220086	0.165285	0.0676403	0.271005	0.330899	0.649715	0.0520904	0.256599	0.0495062
GCA_900542245_1	0.0199379	0.0243171	0.0781362	0.00805329	0.0215333	0.910168	0.500472	0.372279	0.0168402	0.0124091	0.285609	0.262342	0.19901	0.357537	0.36337	0.0304699	0.047883	0.0225619	0.0104897	0.307356	0.00759447	0.0168014	0.0176768	0.0475175	0.0199305	0.750605	0.0419855	0.0255588	0.0119304	0.0811353	0.00313651	0.0171876	0.0833947	0.0117336	0.00489741	0.00917571	0.0395355	0.218839	0.33322	0.00790842	0.0194509	0.0213955	0.58984	0.636733	0.678136	0.021502	0.0605673	0.450484	0.0451397
GCA_900542375_1	0.0156786	0.59925	0.0154958	0.568221	0.640401	0.0145816	0.0122577	0.0149247	0.0153818	0.0108612	0.0125535	0.273527	0.885603	0.0126398	0.807635	0.0133593	0.0100631	0.0708111	0.075966	0.274901	0.164048	0.436639	0.0179913	0.642802	0.016089	0.00847924	0.0338902	0.056117	0.00461813	0.0191664	0.0256976	0.294888	0.0140989	0.0167248	0.00750703	0.118494	0.0114272	0.0160232	0.556036	0.0101525	0.134693	0.196279	0.016202	0.621758	0.506181	0.329461	0.150625	0.0221267	0.00844791
GCA_900542395_1	0.0310586	0.0155539	0.413188	0.00225131	0.00366633	0.91818	0.944802	0.016619	0.00481116	0.00384065	0.804806	0.0110317	0.0281235	0.934729	0.0443024	0.838398	0.0338429	0.0402164	0.751081	0.0144527	0.00383281	0.8334	0.00484211	0.00350727	0.00295904	0.236189	0.807373	0.0300654	0.00410169	0.919703	0.00237943	0.0275217	0.873125	0.698123	0.00150305	0.00314556	0.0448284	0.838044	0.929305	0.0310987	0.0312965	0.0134904	0.0398586	0.0766461	0.0415033	0.00690297	0.0299033	0.0454577	0.941007
GCA_900542445_1	0.0518205	0.0209167	0.0969015	0.00244305	0.0089684	0.373973	0.431326	0.135158	0.00551381	0.00799669	0.623546	0.013299	0.267061	0.87816	0.892369	0.638394	0.059007	0.019365	0.0698168	0.30646	0.00187417	0.361951	0.0116989	0.0338207	0.00756296	0.215577	0.324084	0.603039	0.00197916	0.481355	0.00340173	0.251603	0.40745	0.141831	0.0049412	0.0462218	0.0378602	0.750331	0.732371	0.00770369	0.552333	0.0227764	0.519982	0.399879	0.787017	0.00689654	0.728411	0.891789	0.772445
GCA_900543575_1	0.89874	0.841811	0.816369	0.0136312	0.00870601	0.528871	0.0693909	0.717482	0.796775	0.820138	0.630309	0.848242	0.207088	0.639694	0.79048	0.489576	0.817587	0.115366	0.0608881	0.413841	0.0961999	0.688092	0.593662	0.501457	0.046211	0.399986	0.874426	0.130192	0.00739315	0.573889	0.00385727	0.719696	0.436607	0.0078222	0.00637596	0.704393	0.0148943	0.850798	0.455584	0.0184954	0.863606	0.516934	0.551764	0.445579	0.352711	0.0116107	0.0213281	0.592384	0.0702445
GCA_900543625_1	0.0805224	0.0253252	0.1181	0.00395234	0.0598311	0.897532	0.506041	0.0224561	0.0207158	0.0131526	0.930122	0.0254006	0.14891	0.934995	0.0731178	0.0464794	0.130788	0.0569796	0.0104053	0.0835143	0.141211	0.0560804	0.0101871	0.0185341	0.0186246	0.916042	0.0782879	0.0329412	0.00556449	0.312424	0.00317048	0.363323	0.375942	0.00687672	0.00404824	0.00913422	0.0339873	0.139372	0.269494	0.00839884	0.540532	0.135635	0.1119	0.241608	0.161477	0.111586	0.0552779	0.909319	0.360431
GCA_900544105_1	0.0894722	0.0604029	0.0685437	0.00676587	0.0228445	0.460712	0.38069	0.0271312	0.0102071	0.0123874	0.337535	0.143509	0.454606	0.486591	0.25595	0.0305567	0.119234	0.0267282	0.0108692	0.282542	0.00233327	0.0306087	0.0135327	0.015195	0.0976964	0.320389	0.0528376	0.0174877	0.00705459	0.0431297	0.00253864	0.037423	0.198359	0.00988057	0.00159235	0.0016255	0.134338	0.176327	0.368811	0.00561052	0.0133273	0.125548	0.205497	0.37138	0.464435	0.0580894	0.0691327	0.345469	0.0523707
GCA_900544265_1	0.00264206	0.00209512	0.000893637	0.00907514	0.000970491	0.0015153	0.0203624	0.000698942	0.000346269	0.000560605	0.00158062	0.0116041	0.0642723	0.0055245	0.0513822	0.0112796	0.00695056	0.00701674	0.0010546	0.0207573	0.00071602	0.0315053	0.000654537	0.0208034	0.00524014	0.00163442	0.00470771	0.225409	0.000822334	0.895329	0.000351819	0.235541	0.00412491	0.000226718	0.000151146	0.000233977	0.0622873	0.0082084	0.0128905	0.000634897	0.000871435	0.0073993	0.00280431	0.429614	0.0596449	0.00753721	0.91484	0.0222184	0.0311082
GCA_900544435_1	0.206918	0.14884	0.229832	0.186134	0.195334	0.0362737	0.0694252	0.240725	0.06215	0.278909	0.11772	0.181614	0.272082	0.0246283	0.0694451	0.0468456	0.23946	0.031756	0.0446613	0.103952	0.0159246	0.173851	0.863601	0.178274	0.138327	0.0229774	0.0386096	0.210721	0.0211642	0.0855392	0.0369875	0.0509816	0.0334311	0.0135721	0.0142055	0.00470748	0.0837916	0.143651	0.214016	0.0627008	0.0172506	0.0103601	0.0465872	0.0510456	0.174742	0.0486491	0.0909528	0.0594472	0.0201297
GCA_900544825_1	0.000545108	0.000497457	0.00157705	0.000273465	0.00982591	0.0810326	0.0538033	0.00153243	0.522351	0.000314742	0.00193732	0.000352074	0.00832473	0.00447347	0.000984594	0.0127178	0.00077517	0.268131	0.00654949	0.00270247	0.00025404	0.000348129	0.00456422	0.00874692	0.000517185	0.000359055	0.0692239	0.331114	0.000222474	0.0118889	0.00038971	0.0046407	0.000945744	0.000911751	0.000923588	0.302702	0.000719931	0.00112239	0.292841	0.0226645	0.00347764	0.0388496	0.012112	0.00353865	0.00398603	0.0138344	0.00385916	0.0425542	0.000872901
GCA_900545175_1	0.666723	0.00660793	0.0567641	0.00492581	0.00319649	0.01117	0.00751255	0.00494579	0.00414348	0.0030394	0.00915334	0.00358748	0.0138911	0.0513567	0.0218707	0.00336425	0.00608018	0.00265289	0.00252508	0.00522448	0.00166904	0.00445145	0.0034552	0.00332774	0.00440873	0.00970349	0.00977342	0.00277105	0.00187952	0.00935383	0.00135659	0.00417448	0.00865522	0.00285751	0.000720321	0.0030425	0.00529923	0.30146	0.0293492	0.00268217	0.00301425	0.00231529	0.0100363	0.0277174	0.00791113	0.00346588	0.00300599	0.00584903	0.002162
GCA_900545585_1	0.10555	0.0391086	0.157747	0.0136276	0.0213588	0.916822	0.732975	0.0402605	0.019184	0.049727	0.243757	0.0451777	0.219158	0.474042	0.914454	0.054304	0.0388708	0.0385854	0.0162083	0.371651	0.00761787	0.0331074	0.146413	0.0340582	0.0266705	0.114929	0.212832	0.0428027	0.0153069	0.151781	0.0122968	0.100005	0.416116	0.014462	0.0143397	0.00943661	0.0360147	0.948326	0.399407	0.00785931	0.107151	0.0483567	0.0892302	0.293641	0.794634	0.0383969	0.0968263	0.7881	0.0791258
GCA_900545925_1	0.110004	0.0335298	0.0811015	0.00754853	0.036079	0.895184	0.900016	0.0240676	0.0170605	0.0230834	0.43706	0.138548	0.548909	0.889255	0.85881	0.7537	0.144684	0.054971	0.0132095	0.357946	0.00573004	0.0458951	0.00992053	0.0265699	0.0153063	0.230077	0.110158	0.0620892	0.00415659	0.128428	0.00632366	0.147424	0.444045	0.00990031	0.00503038	0.0071306	0.0713334	0.889631	0.566375	0.0111603	0.0165088	0.0292538	0.851032	0.906522	0.715098	0.0272291	0.0941226	0.840385	0.143511
GCA_900546075_1	0.595082	0.0103031	0.0749398	0.00304865	0.00461352	0.337342	0.64544	0.10731	0.00641802	0.0130278	0.198475	0.050664	0.399996	0.627688	0.327052	0.123181	0.0134319	0.0110425	0.00592737	0.0937464	0.00198035	0.0327734	0.00589548	0.0102352	0.00609138	0.67337	0.418862	0.0170263	0.00202727	0.0940503	0.000698383	0.108981	0.429433	0.00562351	0.000840975	0.00363679	0.0138378	0.384521	0.251771	0.00448277	0.00766171	0.0116684	0.0701303	0.323089	0.242661	0.0158246	0.0277376	0.208638	0.0154059
GCA_900546265_1	0.0605838	0.391874	0.0159928	0.0269514	0.00241797	0.499148	0.0262737	0.00796128	0.00513748	0.0230616	0.0654106	0.0216242	0.710912	0.0402792	0.187082	0.00890858	0.073962	0.0470808	0.0199304	0.0314774	0.00652898	0.0226815	0.0077789	0.0212065	0.01359	0.221387	0.0251794	0.0187909	0.0147637	0.0233291	0.01071	0.0243696	0.0948296	0.00148661	0.0010851	0.00146121	0.0966251	0.261563	0.239477	0.00269087	0.00759355	0.0897924	0.22902	0.527711	0.0869008	0.435373	0.0754788	0.188863	0.336475
GCA_900546295_1	0.0610086	0.00794416	0.0401336	0.00303515	0.00503018	0.189978	0.168793	0.0484076	0.0152303	0.00636425	0.103919	0.0490326	0.20947	0.746066	0.121553	0.035093	0.060757	0.0107288	0.00400281	0.078722	0.00214925	0.0443927	0.00383061	0.00371466	0.00795285	0.129427	0.174892	0.00971539	0.00257133	0.0428893	0.00269018	0.0253219	0.803446	0.0125975	0.00229245	0.00233072	0.012496	0.17833	0.174877	0.00245885	0.0104274	0.0508618	0.062567	0.144418	0.132195	0.012467	0.0391955	0.104923	0.0234069
GCA_900546495_1	0.0674112	0.208978	0.817197	0.0181971	0.0271353	0.593468	0.0527118	0.790882	0.644317	0.886699	0.130236	0.0644159	0.0473306	0.71917	0.551673	0.108416	0.0575103	0.0917055	0.0544848	0.115108	0.0227922	0.0662384	0.0656948	0.0622008	0.0608175	0.0711541	0.277744	0.341552	0.0141293	0.177684	0.050379	0.134424	0.0966439	0.0213983	0.0120349	0.0260187	0.0502915	0.296835	0.514222	0.028253	0.845643	0.0261134	0.365235	0.111161	0.265025	0.494331	0.0467613	0.136504	0.0355299
GCA_900546535_1	0.00120348	0.000267547	0.0021057	0.000364895	0.00924262	0.133096	0.0732971	0.00113095	0.144353	0.000167018	0.00310844	0.00103297	0.0101661	0.00467714	0.0037552	0.0145131	0.00191482	0.112401	0.00588094	0.00262298	0.000244005	0.00129097	0.00818388	0.00774996	0.000989701	0.000614308	0.101441	0.143437	0.000931802	0.0162287	0.000244005	0.00825864	0.00116213	0.00209011	0.00366708	0.131395	0.00103965	0.00503726	0.122282	0.0264038	0.00419677	0.0280161	0.0130449	0.00370366	0.00517215	0.0108543	0.00396994	0.0756471	0.00205607
GCA_900546685_1	0.00461649	0.371104	0.00284333	0.0117726	0.00189298	0.142839	0.0723107	0.101683	0.00214155	0.00412233	0.0361014	0.749208	0.311205	0.45508	0.569201	0.00800855	0.238421	0.0449826	0.00239545	0.0783836	0.0204859	0.0175055	0.0238886	0.00377232	0.0119019	0.645786	0.0164591	0.0294187	0.0113265	0.110962	0.00533251	0.130677	0.0431074	0.000916534	0.000868483	0.000777719	0.199858	0.219386	0.134099	0.00136561	0.0159056	0.188728	0.0403969	0.844455	0.291133	0.434459	0.593419	0.241145	0.259363
GCA_900546885_1	0.33904	0.024207	0.0220108	0.75816	0.00561305	0.0130719	0.0147714	0.0271834	0.00288533	0.0475387	0.215633	0.0543086	0.106891	0.0396511	0.422886	0.15117	0.146895	0.191365	0.043742	0.0232492	0.0592808	0.0258493	0.452806	0.0270651	0.0934268	0.214367	0.0330089	0.0485961	0.582644	0.0520635	0.122647	0.54668	0.25546	0.00128904	0.00796034	0.00109156	0.718312	0.048021	0.110421	0.0031133	0.271417	0.16713	0.0532278	0.141674	0.0904326	0.506927	0.0522474	0.0449654	0.102957
GCA_900547185_1	0.0106728	0.0784736	0.302489	0.0281041	0.00823102	0.0113823	0.0123373	0.00405962	0.0298295	0.00401606	0.175488	0.103622	0.251452	0.0470157	0.0374376	0.147762	0.0142821	0.0373914	0.00790566	0.0544528	0.0105563	0.00950306	0.00751156	0.3161	0.0155962	0.740905	0.010751	0.0444926	0.32813	0.15718	0.00246012	0.233153	0.00900768	0.00273772	0.00235727	0.00110464	0.0233376	0.101865	0.176541	0.00461955	0.0291662	0.0224717	0.235493	0.821313	0.134234	0.0691694	0.731232	0.327843	0.700982
GCA_900547385_1	0.0153823	0.0100003	0.711363	0.00379635	0.0206822	0.689827	0.803564	0.0120086	0.00413469	0.00743603	0.316863	0.00875026	0.91691	0.860475	0.0188952	0.0199549	0.00728481	0.0667056	0.00285474	0.885311	0.00189845	0.0242832	0.00260397	0.0066228	0.00438329	0.0198907	0.352063	0.0246379	0.00357495	0.106382	0.00100036	0.383126	0.502282	0.00577476	0.00372128	0.00150516	0.00856368	0.929821	0.920445	0.00749369	0.00599289	0.0174956	0.872398	0.8762	0.938021	0.00974789	0.87033	0.056083	0.872362
GCA_900547745_1	0.197571	0.0317834	0.0537913	0.00822236	0.0106224	0.292358	0.420768	0.0177272	0.0148834	0.0185654	0.196258	0.0376665	0.20869	0.4892	0.118789	0.0399044	0.0313731	0.0281589	0.0106235	0.0580085	0.00528819	0.0298857	0.008894	0.0115548	0.0132197	0.109104	0.266397	0.0169049	0.00681937	0.141396	0.00259123	0.0446858	0.338717	0.00829084	0.00294951	0.00618115	0.0333688	0.209355	0.440374	0.00535941	0.0200116	0.0427104	0.0768812	0.451338	0.097238	0.0413408	0.0584309	0.167266	0.0645687
GCA_900548125_1	0.876461	0.00913455	0.295349	0.00250596	0.00849822	0.506892	0.636837	0.394692	0.00549815	0.00286921	0.71097	0.00438916	0.0172209	0.378489	0.0989641	0.782727	0.870362	0.00386836	0.0295591	0.014213	0.00161491	0.214639	0.119185	0.00359176	0.00279656	0.0806486	0.200927	0.173622	0.00174796	0.59665	0.00193483	0.594864	0.652442	0.0322432	0.00128537	0.00403641	0.018842	0.063976	0.232551	0.00366879	0.42066	0.00674325	0.740088	0.0310978	0.0396066	0.00377645	0.0363006	0.054262	0.073806
GCA_900548245_1	0.904413	0.0858792	0.142893	0.0946311	0.0757439	0.888667	0.232141	0.953578	0.686228	0.111647	0.312726	0.112901	0.328482	0.22956	0.168806	0.907975	0.320097	0.447829	0.108807	0.60262	0.0946943	0.916633	0.0885585	0.0766629	0.915205	0.0804757	0.205185	0.108734	0.0475846	0.428811	0.126328	0.903362	0.285192	0.811519	0.0677331	0.140812	0.0992	0.876085	0.11963	0.0833595	0.838209	0.0681452	0.151257	0.0798094	0.900346	0.574301	0.0675049	0.684482	0.457878
GCA_900548305_1	0.00422286	0.0135989	0.00508392	0.0147812	0.017109	0.00348432	0.00375111	0.00333604	0.00441236	0.00293356	0.00479022	0.0107323	0.0298251	0.0052677	0.0197151	0.00431103	0.00427782	0.0116363	0.0195616	0.0164151	0.0449853	0.0139109	0.00497171	0.0191008	0.00390397	0.00710833	0.00444843	0.0121121	0.00114846	0.00528201	0.00165972	0.0142842	0.00385932	0.00216754	0.00298394	0.00487381	0.00588201	0.00659937	0.0222651	0.00241143	0.00639727	0.00826996	0.00425778	0.0170827	0.0422389	0.0151733	0.0071278	0.00455606	0.00592666
GCA_900548505_1	0.0130633	0.00836821	0.00773025	0.0071224	0.0068513	0.0391786	0.0480495	0.0086065	0.00288097	0.00533843	0.0368012	0.0095902	0.0734935	0.0318543	0.0191539	0.00852557	0.00989187	0.00810206	0.00329369	0.016424	0.00260582	0.00905249	0.0029039	0.0093735	0.0158211	0.0293177	0.0121619	0.00572373	0.0060299	0.0134036	0.00256761	0.0129437	0.0154753	0.000834888	0.000287737	0.00226953	0.0610093	0.0264934	0.0374477	0.00193908	0.00529122	0.0230455	0.0214454	0.03163	0.0436354	0.0516282	0.143498	0.0306436	0.0642725
GCA_900548595_1	0.00328201	0.00606243	0.00257778	0.117705	0.0412101	0.00467884	0.00175132	0.00277196	0.817541	0.00289101	0.00298889	0.236792	0.00510106	0.00362487	0.49879	0.0031127	0.00829048	0.0126053	0.00245979	0.00697831	0.00451058	0.00246296	0.00346878	0.00612857	0.0701868	0.00357937	0.00189577	0.0206598	0.730564	0.00582593	0.0354328	0.00268148	0.00232275	0.00158519	0.000803175	0.00137672	0.00649471	0.00356455	0.0100508	0.0011418	0.00176614	0.0254852	0.00168942	0.00454762	0.00642857	0.00283704	0.0905619	0.00480847	0.0020037
GCA_900548825_1	0.305495	0.232363	0.825771	0.0228857	0.02146	0.716075	0.799406	0.792815	0.256517	0.250245	0.298785	0.215571	0.257653	0.177743	0.223343	0.0635564	0.191468	0.0527843	0.360122	0.140611	0.0172849	0.21558	0.517899	0.180772	0.257335	0.166263	0.712766	0.167057	0.0161592	0.212223	0.0511411	0.340559	0.198915	0.0364959	0.00815568	0.112091	0.0361375	0.255006	0.455458	0.0260651	0.156619	0.0272305	0.227398	0.145887	0.20555	0.129072	0.0410815	0.641336	0.235007
GCA_900549125_1	0.882288	0.742916	0.170648	0.00728203	0.182484	0.84495	0.375612	0.864425	0.277876	0.0183195	0.580002	0.58898	0.258103	0.568209	0.124552	0.530851	0.188371	0.364412	0.202624	0.120616	0.688907	0.811819	0.362904	0.350566	0.225348	0.622301	0.856093	0.735919	0.0139428	0.878149	0.00568291	0.767869	0.629317	0.133724	0.00245028	0.0106658	0.665397	0.717111	0.605328	0.0148945	0.576526	0.0285517	0.638726	0.255784	0.323843	0.400066	0.154049	0.557943	0.710594
GCA_900549405_1	0.0620007	0.0366298	0.0338451	0.00677059	0.0100889	0.168738	0.290219	0.0160018	0.00520378	0.0161743	0.0536657	0.0431971	0.147412	0.0546256	0.0352868	0.021642	0.0536672	0.0305893	0.00450151	0.254654	0.036839	0.0358557	0.00687713	0.0114016	0.014025	0.127242	0.0449735	0.0148314	0.0113088	0.0294751	0.00313312	0.0284859	0.0364431	0.00272554	0.000792688	0.00372593	0.055687	0.153606	0.0697834	0.00263757	0.0165189	0.0299003	0.0551187	0.192378	0.500042	0.305956	0.114548	0.180334	0.0480021
GCA_900549635_1	0.160107	0.0106131	0.092095	0.00520884	0.00755881	0.739675	0.159228	0.0188611	0.00828851	0.0119789	0.153833	0.229573	0.0540793	0.836937	0.153179	0.0705484	0.0311779	0.0215793	0.00687613	0.264106	0.0154587	0.0651036	0.00566104	0.0300596	0.0277539	0.788771	0.0509489	0.0148078	0.00608466	0.100283	0.0022103	0.0409728	0.278262	0.00985346	0.00252652	0.0057288	0.100085	0.633776	0.299456	0.00285103	0.00872734	0.0285716	0.131241	0.7347	0.628356	0.0246705	0.753889	0.497162	0.086328
GCA_900549795_1	0.0253497	0.0333141	0.0168257	0.0196536	0.00487332	0.106932	0.369979	0.0190402	0.00646068	0.00691164	0.0664735	0.0263823	0.399968	0.0585957	0.298776	0.0168338	0.0193534	0.0273132	0.00620077	0.0329874	0.00479916	0.0162786	0.0313686	0.0259642	0.0191112	0.035696	0.0190165	0.0142071	0.0110783	0.0297813	0.00321533	0.0235159	0.0213501	0.00133628	0.00101386	0.00139631	0.0586423	0.0643462	0.769347	0.00615839	0.0116638	0.0371513	0.08754	0.0692657	0.0799383	0.0529468	0.120987	0.204978	0.518511
GCA_900549885_1	0.135665	0.0252023	0.0245673	0.0415875	0.00852209	0.0444489	0.0716568	0.0137427	0.162585	0.0316012	0.331533	0.524804	0.582145	0.0579434	0.641641	0.0137416	0.0263917	0.213077	0.0169854	0.114318	0.00448054	0.0604694	0.23166	0.0299758	0.100929	0.104335	0.0111139	0.0916194	0.0274724	0.0497508	0.00925214	0.0216941	0.0225713	0.00360477	0.00116498	0.00120899	0.350645	0.0801198	0.404767	0.00667735	0.029887	0.179385	0.171974	0.516396	0.343889	0.909499	0.754146	0.142887	0.43076
GCA_900550165_1	0.11836	0.0125515	0.0863774	0.00175704	0.0241468	0.226674	0.190895	0.0394182	0.0240286	0.00763065	0.16527	0.0927734	0.203434	0.593142	0.193844	0.0384458	0.130846	0.0174073	0.0152579	0.121506	0.0191784	0.0774538	0.00303993	0.0165156	0.0158688	0.178872	0.0842118	0.032867	0.00478912	0.0733787	0.00216393	0.051212	0.166614	0.0177727	0.00128737	0.00139106	0.0341415	0.177795	0.137501	0.00284209	0.029669	0.11954	0.107523	0.21154	0.185765	0.040686	0.0798385	0.158818	0.042999
GCA_900550175_1	0.00584691	0.0143635	0.00758395	0.0173721	0.0926006	0.00586145	0.00209965	0.000431029	0.00284533	0.0034353	0.000228984	0.000365297	0.000102369	0.131541	0.0313773	0.00296386	0.00409693	0.0551669	0.00444552	0.00160935	0.000521006	0.0026088	0.00230654	0.269225	0.0330497	0.00193532	0.00370254	0.00817716	0.0316332	0.002424	0.0315481	0.00134104	0.00153339	0.185956	0.00587977	0.00336903	0.00196064	0.000729516	0.00384316	0.0105246	0.000258617	0.000978974	0.000154632	0.0127752	0.000623914	0.000840506	0.00737113	0.000386848	0.000517235
GCA_900550845_1	0.443271	0.188807	0.179872	0.318739	0.0849257	0.149524	0.0834079	0.128148	0.12072	0.126941	0.172184	0.192336	0.181622	0.654489	0.448681	0.720565	0.168322	0.106736	0.110474	0.177538	0.0631369	0.125518	0.140765	0.119749	0.14526	0.105191	0.136831	0.125829	0.0373077	0.152864	0.0591996	0.14532	0.165623	0.0668966	0.0361201	0.110453	0.171772	0.207333	0.155697	0.067946	0.14913	0.117433	0.364881	0.1675	0.175178	0.140758	0.146906	0.158992	0.114772
GCA_900551275_1	0.0154028	0.0159156	0.0168514	0.00681162	0.0241424	0.385486	0.26443	0.0172401	0.394817	0.0147168	0.0145972	0.0168672	0.0454715	0.0182733	0.0157269	0.0354338	0.0132463	0.35227	0.036931	0.0189262	0.0104856	0.0145428	0.0438235	0.0440328	0.015969	0.0144657	0.359909	0.422508	0.006301	0.04434	0.00994797	0.0363905	0.0160733	0.0120818	0.00480863	0.0925165	0.0148535	0.0156444	0.371695	0.109972	0.0279584	0.0884192	0.0250716	0.018328	0.0182648	0.0406605	0.0274523	0.332619	0.0178179
GCA_900551355_1	0.215923	0.012282	0.0468242	0.00325285	0.0052131	0.487127	0.519279	0.00929541	0.00374403	0.00852838	0.345985	0.0171338	0.237756	0.271422	0.107347	0.030953	0.0208231	0.0185972	0.0038536	0.0425393	0.00271517	0.0145907	0.00447283	0.00566095	0.00542779	0.0984914	0.0969682	0.00789641	0.00427279	0.200809	0.00248137	0.0370243	0.342239	0.00854303	0.00108046	0.00175448	0.0188393	0.238346	0.288052	0.00413964	0.00662165	0.026916	0.0580327	0.560036	0.0834134	0.0235414	0.0480028	0.191793	0.0459419
GCA_900551615_1	0.188254	0.06439	0.141914	0.000831777	0.00167599	0.0204494	0.104558	0.0754661	0.0024742	0.00139003	0.0796075	0.793822	0.0916235	0.537008	0.198402	0.0941786	0.0158193	0.0141122	0.00151	0.0480901	0.000445106	0.0252007	0.0561966	0.00202039	0.0213085	0.0196133	0.00555948	0.00990797	8.14371e-05	0.399099	0.000176551	0.579437	0.155501	0.00106614	0.03184	0.000120601	0.558467	0.157198	0.129419	0.00743626	0.00160512	0.0235092	0.0126445	0.0317586	0.0908974	0.00144846	0.0037573	0.0384178	0.00409112
GCA_900551715_1	0.896274	0.0461613	0.0558536	0.0315182	0.0148228	0.0658481	0.280792	0.0686975	0.0641928	0.0574499	0.914275	0.0394699	0.0623634	0.760767	0.0428535	0.052328	0.888184	0.0293264	0.0558881	0.386204	0.036657	0.0612235	0.0437356	0.0564762	0.0467297	0.030166	0.876281	0.0549672	0.0196966	0.8885	0.0457513	0.885326	0.893804	0.302761	0.0249164	0.0392222	0.0478138	0.906198	0.0401228	0.0422486	0.932788	0.0269918	0.85024	0.43333	0.75677	0.0419129	0.033554	0.279574	0.0421935
GCA_900552015_1	0.195753	0.0214603	0.124217	0.00561955	0.011757	0.486144	0.301107	0.0657097	0.0571199	0.0153916	0.310159	0.157673	0.278044	0.501798	0.285526	0.085548	0.212082	0.0188913	0.00620361	0.206141	0.00533644	0.126765	0.00554391	0.010935	0.0104008	0.299297	0.115922	0.029904	0.00561587	0.12464	0.00415203	0.0830831	0.279348	0.0317245	0.00194759	0.00219761	0.0278656	0.254576	0.154826	0.003933	0.033159	0.19159	0.169095	0.335264	0.300063	0.0317944	0.12364	0.262157	0.0438313
GCA_900552275_1	0.392723	0.315117	0.205071	0.0333391	0.0735325	0.102141	0.0708517	0.0840306	0.111289	0.386103	0.44568	0.612716	0.397002	0.239703	0.534506	0.0730326	0.287161	0.274775	0.211261	0.539526	0.0731777	0.118355	0.140494	0.158472	0.15695	0.389589	0.167196	0.133306	0.0234223	0.124393	0.0424025	0.387763	0.22246	0.0286118	0.0167403	0.167106	0.0931712	0.419198	0.506653	0.0494194	0.0892263	0.0610267	0.37412	0.569826	0.444843	0.364817	0.10688	0.124787	0.255927
GCA_900552445_1	0.00184522	0.0301089	0.00300787	0.00888666	0.0546998	0.0115153	0.00120168	0.0032354	0.0024387	0.00281716	0.00199322	0.00193137	0.00122597	0.116663	0.00833736	0.0133812	0.00726454	0.0140578	0.00494145	0.00550547	0.00126868	0.00555186	0.00154186	0.155791	0.0273992	0.00174729	0.00264339	0.00531624	0.0645481	0.00241366	0.0177026	0.0010176	0.00339739	0.0776907	0.0105957	0.00232236	0.00277372	0.00135262	0.00483248	0.0220808	0.00225903	0.00391428	0.00377144	0.00758926	0.00431779	0.0022178	0.00745157	0.00195493	0.00226124
GCA_900552625_1	0.00740929	0.000907201	0.000583409	0.000340808	0.000142935	0.217917	0.0030488	0.000668489	0.000287815	0.000309693	0.00602807	0.0333885	0.0323564	0.0451865	0.00227627	0.000800729	0.00959319	0.000158979	0.000282467	0.00252762	0.00457344	0.000563962	0.000980127	0.000344211	0.000736554	0.00408872	0.00329091	0.0010618	0.000454573	0.00521422	0.000152659	0.00101902	0.00232391	0.000140018	0.000110362	9.43178e-05	0.00268125	0.0120153	0.0135511	0.000100152	0.000570768	0.00098742	0.00710495	0.0029433	0.00704175	0.000717107	0.00119599	0.047892	0.0129604
GCA_900552665_1	0.519187	0.59458	0.61506	0.0770092	0.136207	0.2323	0.0781844	0.191873	0.618819	0.144977	0.44189	0.661911	0.501443	0.232477	0.349859	0.579415	0.625576	0.15838	0.606453	0.669638	0.0847023	0.204277	0.460223	0.630893	0.264143	0.193715	0.367631	0.237793	0.0554261	0.235	0.0619341	0.202737	0.634179	0.0789192	0.0760636	0.121675	0.550732	0.593031	0.285593	0.083005	0.198476	0.191056	0.532588	0.629839	0.566705	0.216258	0.287999	0.476127	0.131574
GCA_900553545_1	0.339645	0.00767486	0.187908	0.00147222	0.00942767	0.934802	0.11842	0.0446154	0.00394724	0.0196888	0.656844	0.0164822	0.0803945	0.899218	0.057068	0.376942	0.021077	0.0111769	0.010524	0.526172	0.00146926	0.119653	0.00789625	0.00956205	0.00335527	0.813991	0.128588	0.00598361	0.00240576	0.081579	0.00180728	0.0344596	0.23013	0.00159121	0.00157523	0.00172677	0.0253013	0.253354	0.635457	0.00282724	0.00581608	0.00589422	0.0613225	0.402124	0.85548	0.00695384	0.025692	0.864975	0.0763993
GCA_900553635_1	0.17431	0.0354207	0.309386	0.0131482	0.017338	0.0412484	0.0277379	0.0417755	0.0256161	0.0536743	0.188974	0.0438598	0.0341276	0.374141	0.0647902	0.0204074	0.0303018	0.0202781	0.0261786	0.0353736	0.00808385	0.126377	0.0214063	0.324922	0.0184088	0.164304	0.0306505	0.0202989	0.0109977	0.0288537	0.00673883	0.0289914	0.0330027	0.0105355	0.0013263	0.0118086	0.0343548	0.0685369	0.0646283	0.00609107	0.048543	0.0194597	0.0523626	0.0682574	0.0706408	0.03285	0.0257135	0.171127	0.0245648
GCA_900554965_1	0.660902	0.646956	0.657846	0.096735	0.45608	0.592414	0.158322	0.627333	0.657632	0.628841	0.587642	0.657342	0.466234	0.53535	0.601159	0.605632	0.621476	0.550675	0.651527	0.70189	0.547316	0.646507	0.2104	0.266232	0.596025	0.598807	0.553491	0.623934	0.0771377	0.645739	0.524122	0.647791	0.586141	0.144941	0.0761211	0.548533	0.626065	0.648723	0.586463	0.510196	0.665063	0.615977	0.550876	0.479394	0.657073	0.515805	0.515268	0.553156	0.561391
GCA_900555475_1	0.0641738	0.0512939	0.0517333	0.015325	0.026346	0.057208	0.108282	0.0416372	0.0298537	0.0270564	0.0571892	0.0489541	0.0713484	0.138445	0.0939601	0.0657029	0.0421857	0.0726497	0.0526797	0.0854538	0.018723	0.0320614	0.0247062	0.0341212	0.0390728	0.0603021	0.0477835	0.0503116	0.0248599	0.0606768	0.0339908	0.0427116	0.06924	0.0140133	0.0062913	0.0206222	0.0696464	0.116448	0.0943038	0.0215561	0.0496755	0.0630599	0.0975831	0.403809	0.15217	0.269552	0.0851671	0.264523	0.0478747
GCA_900555925_1	0.0121802	0.0257625	0.00613143	0.00298271	0.000502937	0.243477	0.0104986	0.000722245	0.000528666	0.000253613	0.0141649	0.00297903	0.0728732	0.044438	0.0176432	0.00210854	0.00106101	0.00274135	0.00130053	0.0202198	0.00275053	0.00160866	0.000508451	0.00822342	0.00273767	0.14078	0.00466427	0.000681201	0.000103528	0.00504408	0.000115167	0.0324128	0.0237391	0.000202155	5.88088e-05	0.000512126	0.00839066	0.0213543	0.00701601	0.000142121	0.00453195	0.00279464	0.0217176	0.110507	0.0531282	0.055619	0.0519704	0.158516	0.129423
GCA_900556695_1	0.748195	0.0396042	0.0874337	0.00316778	0.00844905	0.0289339	0.103062	0.13585	0.00165943	0.00408243	0.125705	0.0464934	0.13885	0.14869	0.13772	0.104825	0.00595582	0.0120447	0.00153775	0.0545652	0.0015157	0.0356443	0.0494971	0.00438459	0.0105192	0.0257693	0.00829062	0.0108786	0.000796232	0.0444338	0.000565937	0.0211373	0.140336	0.00178356	0.0571335	0.00935389	0.0714739	0.74099	0.113779	0.0203525	0.00446707	0.041636	0.037084	0.0381285	0.090884	0.00476514	0.00648582	0.0400403	0.00658627
GCA_900556785_1	0.0129685	0.0343961	0.0280812	0.0695322	0.22894	0.0126198	0.00381753	0.000499952	0.00556243	0.0137703	0.000617842	0.00105977	0.000865349	0.198603	0.0174286	0.0073246	0.0144276	0.130225	0.0110786	0.00498162	0.00057155	0.00712586	0.00711351	0.588225	0.103193	0.00532788	0.00748879	0.0262635	0.0948156	0.00442982	0.0458413	0.00364039	0.00142641	0.420286	0.0406788	0.00879977	0.00213375	0.0028059	0.00992374	0.0244754	0.00035367	0.00406134	0.000292564	0.0314291	0.00185908	0.00282195	0.0254148	0.000951143	0.00226089
GCA_900557055_1	0.354355	0.593572	0.700912	0.05693	0.100633	0.321226	0.144176	0.118135	0.161609	0.260315	0.610937	0.687777	0.651026	0.736811	0.655306	0.109891	0.660262	0.300654	0.145165	0.731968	0.0647329	0.0894765	0.597667	0.137481	0.484519	0.16724	0.271733	0.182838	0.0450208	0.590228	0.0547162	0.413468	0.696097	0.0459277	0.0271602	0.357443	0.763195	0.689524	0.427893	0.0591638	0.461108	0.57951	0.489479	0.710559	0.732659	0.607909	0.68179	0.714682	0.250798
GCA_900557155_1	0.0704722	0.0092935	0.341596	0.00714325	0.00271291	0.538981	0.196182	0.0123865	0.00541703	0.0351555	0.734196	0.328573	0.92068	0.595855	0.876744	0.104637	0.00319652	0.0104621	0.00269534	0.0260847	0.00344178	0.00678885	0.0172516	0.00789722	0.150024	0.519483	0.382923	0.0092935	0.00779937	0.0238485	0.00335397	0.109287	0.306879	0.0409319	0.0011021	0.00184289	0.0458196	0.169404	0.322178	0.0048688	0.0969125	0.0122755	0.0488618	0.462334	0.0781154	0.0313141	0.0942071	0.219425	0.49699
GCF_000011065_1	0.87368	0.220235	0.0611213	0.00686243	0.0909847	0.348473	0.291809	0.0341347	0.0820795	0.00954858	0.275552	0.688528	0.00575698	0.283676	0.699605	0.104366	0.926022	0.257183	0.289186	0.050348	0.0396107	0.0218577	0.00692535	0.811086	0.183559	0.266465	0.039124	0.193681	0.62994	0.0651614	0.124447	0.0052393	0.0474167	0.00647234	0.00745209	0.00168955	0.0704977	0.0483561	0.0612988	0.0098624	0.0166611	0.287248	0.424361	0.121069	0.104425	0.868642	0.0451162	0.592971	0.0421001
GCF_000012825_1	0.156234	0.797875	0.830807	0.00329002	0.18282	0.895655	0.673413	0.222712	0.159234	0.0391444	0.434499	0.855453	0.0709687	0.871612	0.881068	0.821285	0.873371	0.829734	0.794286	0.796465	0.224997	0.666799	0.0184822	0.790044	0.85784	0.642554	0.277523	0.749831	0.862725	0.714336	0.318799	0.0462946	0.742968	0.199525	0.0101282	0.0149228	0.816887	0.810039	0.862539	0.0499747	0.63034	0.795331	0.871882	0.873218	0.879296	0.875611	0.832414	0.895703	0.606741
GCF_000012845_1	0.493562	0.00470925	0.0268798	0.824077	0.738588	0.421864	0.374302	0.0386592	0.115722	0.00369478	0.147235	0.388608	0.00986453	0.446841	0.348133	0.102388	0.621006	0.470686	0.614557	0.409711	0.0940562	0.0441148	0.00873388	0.887407	0.298863	0.24541	0.0789869	0.391389	0.0061261	0.237143	0.189797	0.0214861	0.0514501	0.00625746	0.000681717	0.000718297	0.596915	0.485144	0.883176	0.00591244	0.0220706	0.473025	0.762401	0.88326	0.740719	0.88658	0.773466	0.648455	0.115428
GCF_000020605_1	0.643124	0.836787	0.804853	0.11359	0.767992	0.756563	0.241236	0.809381	0.132458	0.771409	0.697257	0.792649	0.619152	0.712365	0.819946	0.816088	0.831069	0.680229	0.696555	0.666392	0.0604893	0.790889	0.777737	0.694584	0.81878	0.720226	0.808298	0.81354	0.0478203	0.732127	0.0590245	0.801131	0.790918	0.240612	0.052219	0.640747	0.119771	0.633518	0.790432	0.11314	0.775654	0.151714	0.76055	0.838078	0.11907	0.661555	0.820052	0.664385	0.690421
GCF_000024945_1	0.00274606	0.0462361	0.0704953	0.0703499	0.705581	0.0125934	0.00296416	0.00269823	0.0305369	0.0431083	0.0016861	0.00483457	0.00125085	0.428227	0.0723165	0.0501833	0.052496	0.246458	0.0135324	0.0143968	0.000497153	0.0366988	0.00432382	0.529275	0.163667	0.0224769	0.00164529	0.0273861	0.366373	0.00988302	0.01375	0.0102099	0.00149615	0.551169	0.447712	0.0136576	0.00646158	0.00424503	0.051232	0.0659318	0.00249983	0.00659994	0.0062191	0.0695864	0.0143316	0.00750935	0.0803399	0.00238774	0.00631196
GCF_000025985_1	0.0108409	0.503494	0.0494197	0.0011832	0.00596505	0.0170124	0.0145911	0.014415	0.0245004	0.131581	0.00412652	0.0102864	0.00328252	0.262399	0.00762329	0.00348837	0.434384	0.164991	0.0521951	0.282859	0.143515	0.00283496	0.00733789	0.875869	0.00796574	0.519495	0.436642	0.228256	0.00782399	0.145616	0.0329805	0.00751932	0.00862125	0.000562031	0.00580079	0.000334624	0.135785	0.177255	0.163673	0.313727	0.00671137	0.067935	0.09758	0.862005	0.634722	0.816479	0.816451	0.040823	0.141713
GCF_000026325_1	0.0346969	0.00414262	0.0159227	0.00415121	0.624202	0.0893597	0.181677	0.00131257	0.00473331	0.00553357	0.0198208	0.172302	0.0886555	0.0115317	0.13904	0.00470158	0.109139	0.843155	0.00353682	0.0789399	0.00489493	0.0142081	0.00312456	0.614249	0.0487628	0.0123532	0.060659	0.799433	0.625773	0.0304886	0.145119	0.0263055	0.583028	0.576799	0.254233	0.571462	0.373411	0.317087	0.838026	0.371781	0.0057286	0.504389	0.0078588	0.260031	0.000738308	0.657902	0.162333	0.011078	0.637917
GCF_000146185_1	0.254952	0.242345	0.371911	0.0878	0.0334232	0.15931	0.499776	0.077847	0.0820156	0.205473	0.467999	0.275233	0.461388	0.15852	0.426228	0.133644	0.386367	0.0498091	0.0589912	0.125094	0.0183147	0.0261232	0.0323325	0.389269	0.330723	0.510256	0.345759	0.0987731	0.0557013	0.0873116	0.0468011	0.0443245	0.765509	0.0244714	0.0090528	0.0160476	0.0732513	0.584836	0.353258	0.0423587	0.0668584	0.317504	0.320402	0.529701	0.263051	0.0465422	0.477936	0.387445	0.0337184
GCF_000153885_1	0.493859	0.434396	0.266132	0.0473079	0.0715383	0.104348	0.0970048	0.0837658	0.160699	0.598387	0.640738	0.818696	0.559284	0.331297	0.786169	0.0491294	0.383944	0.409649	0.261644	0.773157	0.0909201	0.113555	0.207219	0.200005	0.198947	0.596286	0.222189	0.110311	0.0522117	0.116353	0.0449026	0.5856	0.26681	0.042293	0.0234816	0.225992	0.077279	0.577625	0.709303	0.0404813	0.104346	0.0557019	0.480017	0.800001	0.658232	0.50332	0.09025	0.126308	0.366402
GCF_000153905_1	0.880161	0.875356	0.87434	0.116349	0.152438	0.536396	0.586353	0.861108	0.865433	0.819438	0.861603	0.845935	0.869195	0.5793	0.814466	0.688385	0.796072	0.742697	0.881907	0.82605	0.170096	0.927702	0.83379	0.833354	0.881914	0.535591	0.880833	0.896288	0.0824754	0.856856	0.736411	0.904741	0.786878	0.231236	0.0706657	0.796513	0.792601	0.805654	0.838358	0.75268	0.83128	0.766168	0.845126	0.440675	0.82889	0.778135	0.834339	0.805737	0.77859
GCF_000153925_1	0.046159	0.0550846	0.236454	0.73909	0.897307	0.145257	0.776565	0.0646384	0.726557	0.0479261	0.0483083	0.905644	0.916839	0.159815	0.909255	0.0423114	0.869141	0.893287	0.905431	0.598725	0.196595	0.919163	0.084109	0.905115	0.0592553	0.0321664	0.364054	0.46668	0.887363	0.220779	0.386878	0.38528	0.0566675	0.0512816	0.030969	0.105392	0.6197	0.579833	0.882432	0.0426684	0.917363	0.897075	0.907751	0.708594	0.348916	0.776615	0.466922	0.916579	0.909639
GCF_000154065_1	0.894004	0.824092	0.902537	0.0876871	0.884996	0.884532	0.0996428	0.880136	0.879349	0.905783	0.914928	0.912308	0.872506	0.842344	0.874409	0.926912	0.843084	0.87473	0.868795	0.874943	0.862007	0.906191	0.842267	0.891066	0.881663	0.747053	0.919295	0.924675	0.0606586	0.917602	0.266347	0.910363	0.914803	0.276955	0.0404094	0.905265	0.300733	0.889894	0.883433	0.866633	0.864514	0.864181	0.862954	0.846854	0.36469	0.752215	0.119892	0.829185	0.874735
GCF_000154105_1	0.911743	0.0160013	0.0644212	0.00452821	0.135436	0.667022	0.385535	0.0841301	0.0677235	0.0280806	0.294267	0.779473	0.032819	0.0567494	0.483341	0.466003	0.0488664	0.47269	0.54645	0.679403	0.103858	0.0248451	0.0129763	0.0568945	0.766728	0.653423	0.109145	0.110242	0.0443667	0.553442	0.0471584	0.0576976	0.601943	0.0089714	0.000345071	0.00175945	0.835932	0.686521	0.768463	0.00644133	0.304041	0.0409089	0.87333	0.0971578	0.939484	0.883216	0.898098	0.880443	0.789197
GCF_000154205_1	0.934892	0.0156738	0.403773	0.00548919	0.249863	0.792391	0.464143	0.326012	0.0461351	0.651519	0.330966	0.900277	0.850667	0.822892	0.867179	0.70671	0.866039	0.737945	0.819835	0.859214	0.126835	0.265346	0.012573	0.0528381	0.763174	0.70257	0.213814	0.387193	0.764167	0.621961	0.300808	0.125959	0.484075	0.0364983	0.00406116	0.0188057	0.803368	0.822693	0.793583	0.0208228	0.369204	0.86499	0.851984	0.82657	0.915382	0.89047	0.770113	0.825759	0.858268
GCF_000154325_1	0.252689	0.8329	0.535129	0.0213195	0.0189767	0.841265	0.0918774	0.0135209	0.0127952	0.0146747	0.156945	0.789001	0.869752	0.0779689	0.855236	0.8416	0.0103004	0.266214	0.00891816	0.0619828	0.147774	0.205651	0.176371	0.0907355	0.697068	0.473558	0.687077	0.0732793	0.00640964	0.331591	0.0073991	0.430703	0.314937	0.0102714	0.00755783	0.0064267	0.365022	0.631184	0.675464	0.0124084	0.181231	0.840786	0.18361	0.86185	0.187381	0.776032	0.835768	0.761165	0.370157
GCF_000154345_1	0.245043	0.449291	0.0591672	0.382454	0.0292202	0.136032	0.324996	0.331891	0.0286489	0.161299	0.204902	0.334119	0.220742	0.518995	0.246137	0.0731069	0.874086	0.097625	0.0952233	0.21855	0.136337	0.123079	0.0671829	0.679106	0.116019	0.314193	0.260012	0.127306	0.385813	0.345803	0.0160617	0.367471	0.101107	0.0271282	0.0078576	0.0204314	0.496024	0.503092	0.570169	0.0104773	0.118374	0.778044	0.29101	0.163312	0.57922	0.467233	0.32822	0.728709	0.36621
GCF_000154425_1	0.0528662	0.0461897	0.693192	0.0261651	0.0727006	0.0592906	0.0326775	0.153046	0.0378023	0.0393414	0.0528984	0.0482367	0.219169	0.0847174	0.158183	0.0395728	0.0438797	0.0276772	0.0378397	0.902145	0.0273127	0.0405893	0.0380711	0.0362928	0.032731	0.220882	0.234563	0.0346031	0.0222615	0.160928	0.0229086	0.0866559	0.0858267	0.0205773	0.018079	0.0221483	0.0428987	0.254779	0.178011	0.0262628	0.0389186	0.0394987	0.0434659	0.906831	0.228847	0.0292206	0.0428677	0.0735279	0.0492764
GCF_000154465_1	0.734748	0.795753	0.554889	0.0143817	0.587493	0.522643	0.438885	0.371144	0.511969	0.00338145	0.549296	0.698481	0.791136	0.909588	0.892889	0.0143429	0.862885	0.808152	0.664688	0.751532	0.138891	0.344268	0.0370572	0.804792	0.792403	0.816984	0.345608	0.411785	0.666879	0.0897357	0.00121301	0.00570907	0.651648	0.00228331	0.0066202	0.0299983	0.799949	0.827503	0.811271	0.0252239	0.53181	0.87811	0.707457	0.805934	0.785588	0.785341	0.144605	0.813986	0.795746
GCF_000154525_1	0.0350741	0.0619762	0.267365	0.00762202	0.605306	0.0717908	0.025724	0.00923256	0.138904	0.0119564	0.0627136	0.0695119	0.0390518	0.828609	0.0607071	0.366688	0.790628	0.118542	0.0477232	0.0564253	0.0046174	0.125777	0.0173436	0.0584828	0.0511443	0.0275338	0.194016	0.269327	0.041014	0.163178	0.00259188	0.0253255	0.394439	0.00333655	0.000823227	0.00437076	0.0626924	0.0566353	0.103314	0.526583	0.0261363	0.0542911	0.0733627	0.0751079	0.0786243	0.112064	0.806501	0.493881	0.220821
GCF_000154805_1	0.0558413	0.193825	0.00535049	0.688795	0.00655021	0.0115748	0.00415475	0.0651914	0.015308	0.0476323	0.0111349	0.0253956	0.0289872	0.0110819	0.137231	0.00885951	0.0236024	0.408401	0.0204507	0.139927	0.178337	0.0043801	0.622129	0.0985981	0.525597	0.454497	0.0242617	0.0364615	0.102793	0.0196024	0.107213	0.00591804	0.0444033	0.0728994	0.167377	0.0218542	0.0534746	0.529088	0.132999	0.828646	0.0123374	0.685692	0.411751	0.00536764	0.0323418	0.236313	0.251932	0.00386041	0.478397
GCF_000154845_1	0.0156183	0.717849	0.0155455	0.0059151	0.0152506	0.161504	0.0416045	0.00422653	0.035328	0.00585974	0.731921	0.730506	0.0497829	0.0634931	0.0560741	0.01992	0.0350112	0.0472003	0.0245358	0.0257969	0.00201698	0.00576369	0.018404	0.0508833	0.737163	0.323007	0.00809674	0.0356401	0.0368473	0.0262733	0.00242191	0.00724758	0.619528	0.000404232	0.000470287	0.00128829	0.0400493	0.0289475	0.063238	0.00866797	0.0145335	0.0833305	0.0534264	0.051976	0.0490454	0.108368	0.0490459	0.0878238	0.0165268
GCF_000155205_1	0.930938	0.105579	0.925044	0.0684364	0.070701	0.0886658	0.249869	0.273704	0.0843377	0.0884651	0.691827	0.928151	0.917208	0.643759	0.921745	0.519535	0.345608	0.533538	0.0843805	0.0879141	0.0946389	0.0951705	0.74596	0.914902	0.732088	0.060655	0.0942522	0.436548	0.0502666	0.311863	0.0719576	0.853544	0.0869654	0.0461897	0.0287727	0.0568453	0.213849	0.918811	0.295553	0.0614766	0.0856818	0.914202	0.0882905	0.812075	0.0884391	0.845167	0.915527	0.0813478	0.901316
GCF_000155815_1	0.0122262	0.013834	0.0906223	0.0053788	0.0316127	0.106459	0.0195487	0.00744363	0.0252903	0.00882638	0.699467	0.264696	0.0535468	0.0482568	0.760375	0.0650793	0.0728319	0.717138	0.24982	0.217251	0.00152566	0.00368973	0.0025255	0.0490438	0.052672	0.0129782	0.0106796	0.140976	0.0413528	0.309028	0.0102387	0.00297258	0.690911	0.0018253	0.000891775	0.000849787	0.0461607	0.0318808	0.249062	0.026497	0.012451	0.0573899	0.785123	0.805635	0.523915	0.802598	0.0784199	0.0783066	0.549126
GCF_000155875_1	0.868583	0.832231	0.879448	0.0939913	0.142772	0.874951	0.121375	0.895825	0.825951	0.930862	0.859213	0.866595	0.915511	0.86678	0.908221	0.883522	0.871063	0.521877	0.836125	0.857917	0.686466	0.886599	0.860378	0.810586	0.861365	0.817955	0.894663	0.733729	0.0546377	0.704198	0.102771	0.892265	0.858062	0.252879	0.071019	0.882425	0.830441	0.913641	0.842364	0.149906	0.905234	0.762018	0.826181	0.771688	0.8874	0.850303	0.820038	0.854942	0.820226
GCF_000156075_1	0.76022	0.123353	0.184012	0.00808857	0.76543	0.243855	0.580172	0.293413	0.0235463	0.0135658	0.198268	0.424014	0.0264462	0.291637	0.478063	0.150171	0.271527	0.175566	0.359081	0.605023	0.0237544	0.12737	0.012262	0.282188	0.369207	0.0814789	0.0384801	0.132731	0.234931	0.245337	0.0444231	0.0380669	0.154102	0.0185389	0.0552499	0.00254368	0.419847	0.205205	0.23854	0.320514	0.466807	0.191549	0.286083	0.37298	0.81745	0.30469	0.252959	0.864124	0.228552
GCF_000156195_1	0.0592748	0.0344743	0.0322888	0.00422839	0.0308092	0.0433581	0.0405194	0.0630966	0.00967623	0.0234801	0.133348	0.222736	0.01422	0.0814909	0.833344	0.0350842	0.105778	0.0553779	0.082631	0.0338717	0.00724654	0.00651766	0.0383781	0.0995031	0.507244	0.0544019	0.0134368	0.0364314	0.0978947	0.0424887	0.00782561	0.00400172	0.0614146	0.0211011	0.000998487	0.0022907	0.114637	0.0515555	0.197627	0.0273759	0.13458	0.0931757	0.144121	0.13343	0.0698577	0.129459	0.124401	0.0846781	0.0779421
GCF_000156495_1	0.0407855	0.0100808	0.00511258	0.00311434	0.00797566	0.0330904	0.0167744	0.0105567	0.0103367	0.0026738	0.0138213	0.034412	0.0103573	0.0122797	0.0208491	0.0245804	0.148532	0.0300695	0.0279169	0.0122752	0.0033422	0.00141542	0.0111678	0.0135853	0.0462299	0.025104	0.00654823	0.030365	0.00847311	0.0317937	0.000947055	0.00192004	0.0300132	0.000510309	5.77549e-05	7.90442e-05	0.0452409	0.0153137	0.0310545	0.00215358	0.0104361	0.129727	0.0412122	0.0236534	0.0238642	0.0783033	0.0840952	0.0632659	0.0188703
GCF_000157935_1	0.00184472	0.00115071	0.00317719	0.00150455	0.0225272	0.643548	0.515811	0.00153817	0.677308	0.000359257	0.00362191	0.00221167	0.0783081	0.00588686	0.00198631	0.015623	0.00341878	0.649422	0.0304126	0.0106284	0.00101823	0.000784041	0.0621033	0.0696437	0.000472647	0.00202677	0.673019	0.701792	0.00123646	0.0546264	0.000634469	0.10263	0.00189087	0.00340055	0.00110512	0.186858	0.00152848	0.0015131	0.662618	0.222429	0.0280007	0.200779	0.0152783	0.0170025	0.0166512	0.0745551	0.0215819	0.485308	0.00343189
GCF_000157995_1	0.0597392	0.77207	0.0242005	0.0224076	0.0168839	0.0973239	0.0675933	0.0761153	0.514462	0.0443062	0.0718824	0.424322	0.164511	0.382221	0.0441426	0.162862	0.270515	0.481851	0.27226	0.154179	0.0178694	0.118613	0.781425	0.19616	0.0323082	0.0634982	0.0683205	0.0805758	0.0297731	0.0782721	0.0816365	0.0673829	0.0560326	0.0114023	0.00978977	0.00945983	0.0836378	0.0827244	0.192735	0.00776654	0.0671452	0.0652481	0.35651	0.183947	0.212208	0.374368	0.380775	0.22674	0.236142
GCF_000158035_1	0.701436	0.0355149	0.00458171	0.000938692	0.0184167	0.00188571	0.00499847	0.00145989	0.00173379	0.00982062	0.0583485	0.111156	0.00814117	0.00399609	0.204279	0.0876362	0.0205862	0.0727758	0.00416422	0.0107597	0.00440057	0.000888295	0.000895745	0.00226317	0.563927	0.00169201	0.001413	0.0529838	0.343314	0.00425917	0.00119111	0.00898856	0.00378457	0.000477234	0.000577443	0.000618783	0.485164	0.00264166	0.473121	0.00222724	0.0752543	0.0274454	0.0127328	0.00809253	0.0208738	0.469661	0.0055166	0.0103884	0.00382021
GCF_000160055_1	0.00236134	0.0177936	0.00197525	0.00414355	0.155771	0.041138	0.0166507	0.00139296	0.00954767	0.941931	0.00257126	0.0207177	0.045041	0.00275322	0.653296	0.0211687	0.854914	0.479532	0.0158469	0.837442	0.4532	0.858854	0.0109122	0.176669	0.0122139	0.0207657	0.00859776	0.494035	0.854878	0.824038	0.0160077	0.718948	0.0265892	0.00731028	0.144669	0.0855867	0.0194551	0.00576542	0.86632	0.103229	0.839614	0.856707	0.877352	0.0255427	0.860967	0.0706871	0.0462879	0.830515	0.0183411
GCF_000162015_1	0.187181	0.84988	0.875912	0.102929	0.181866	0.919587	0.529841	0.551269	0.898162	0.154843	0.869683	0.920202	0.891948	0.935285	0.913854	0.855873	0.849844	0.783043	0.808607	0.857742	0.0801002	0.906808	0.112824	0.781376	0.832716	0.384132	0.823276	0.834708	0.0859099	0.759039	0.0364984	0.812957	0.872294	0.655727	0.0284236	0.776767	0.233589	0.860181	0.65462	0.065495	0.884657	0.244262	0.525748	0.640888	0.902001	0.857363	0.270768	0.919509	0.761181
GCF_000164675_2	0.0821159	0.17344	0.267006	0.0638079	0.157229	0.0113658	0.0083579	0.0523005	0.016759	0.459911	0.0396517	0.0560406	0.00828685	0.161441	0.671071	0.0172423	0.0358159	0.435425	0.648741	0.775046	0.0580173	0.169081	0.0331795	0.726276	0.327366	0.0732017	0.175599	0.260878	0.0524407	0.0259643	0.858417	0.281452	0.28555	0.515088	0.340523	0.181303	0.0603598	0.0620137	0.109389	0.255169	0.061795	0.139818	0.0112302	0.0307998	0.0052678	0.383196	0.0183665	0.00973695	0.0138918
GCF_000169235_1	0.871798	0.843052	0.891219	0.094044	0.835614	0.536246	0.432817	0.895124	0.887404	0.856559	0.795525	0.861599	0.597376	0.752709	0.892446	0.899157	0.848967	0.762805	0.881803	0.865391	0.791525	0.873306	0.81834	0.831831	0.870729	0.770663	0.827565	0.899782	0.0645386	0.875345	0.127483	0.890947	0.776424	0.385186	0.0595961	0.84209	0.703809	0.828855	0.75811	0.809038	0.81398	0.132119	0.846848	0.676336	0.878361	0.0976249	0.383093	0.731572	0.825593
GCF_000172175_1	0.0725902	0.818541	0.010168	0.00733983	0.015681	0.022378	0.00996399	0.0039284	0.00883175	0.00770314	0.0116796	0.0344266	0.018249	0.0313427	0.511441	0.226813	0.848937	0.165063	0.0188927	0.38059	0.00762648	0.0170948	0.00494284	0.0281221	0.0382224	0.0168833	0.00940902	0.0160718	0.082474	0.00775072	0.00539669	0.0203612	0.111315	0.000290454	0.000922084	0.000285002	0.0388803	0.0309223	0.0641449	0.00596934	0.0437487	0.860204	0.532416	0.0306168	0.712417	0.0581134	0.0183151	0.267736	0.670523
GCF_000173975_1	0.822355	0.850481	0.888032	0.055531	0.700274	0.851493	0.177305	0.875384	0.873508	0.905608	0.829221	0.848417	0.602687	0.784485	0.847419	0.858751	0.856149	0.688141	0.862256	0.897867	0.843817	0.86919	0.177749	0.165918	0.83305	0.861392	0.810685	0.856823	0.0302412	0.90765	0.857654	0.900293	0.779551	0.19913	0.0682512	0.856542	0.848739	0.848457	0.843238	0.828902	0.91223	0.819028	0.744109	0.603492	0.854721	0.739971	0.764292	0.72367	0.813887
GCF_000174195_1	0.596029	0.684581	0.620178	0.0714414	0.1396	0.306722	0.114515	0.16275	0.695892	0.138509	0.477795	0.765321	0.577707	0.265294	0.417014	0.674446	0.730865	0.134675	0.637233	0.727938	0.0566404	0.188712	0.480752	0.652124	0.245957	0.246227	0.393802	0.228055	0.0659817	0.258728	0.0520637	0.196068	0.754421	0.0604801	0.0276165	0.105943	0.62027	0.67024	0.325308	0.0481958	0.193934	0.186353	0.655662	0.758753	0.635657	0.230215	0.356031	0.561166	0.14738
GCF_000180035_1	0.0988523	0.0797951	0.27169	0.0433702	0.17633	0.0152295	0.00466663	0.0317543	0.00973076	0.312716	0.0443964	0.0214476	0.0105067	0.0681651	0.469325	0.0135312	0.0281973	0.342025	0.443677	0.835843	0.0437092	0.146731	0.0242579	0.448408	0.233756	0.0681197	0.159431	0.135768	0.0690332	0.0197459	0.705351	0.343057	0.223155	0.648703	0.343986	0.139714	0.059122	0.0686318	0.102086	0.556136	0.0206262	0.088504	0.00560356	0.0352231	0.0144291	0.484152	0.0181846	0.0112759	0.0129415
GCF_000187895_1	0.0359837	0.0329348	0.024305	0.00507381	0.0212545	0.0474332	0.205586	0.00384538	0.0276579	0.00586396	0.0308802	0.0472446	0.0313857	0.0612087	0.0621225	0.0208825	0.0487236	0.0409898	0.0329587	0.084826	0.00411766	0.011677	0.0207028	0.0564618	0.0518966	0.041377	0.0416111	0.0324001	0.0543648	0.0184877	0.00373819	0.0191851	0.294107	0.000993007	0.000148578	0.000601774	0.0732136	0.0435102	0.067185	0.00819055	0.0131104	0.0450487	0.0572846	0.0462161	0.0598398	0.0759307	0.0460885	0.376598	0.0338663
GCF_000188295_1	0.243229	0.181203	0.490898	0.0788331	0.175658	0.0243176	0.0128302	0.351381	0.0911097	0.228989	0.0760485	0.0902172	0.0286067	0.161782	0.434808	0.0804907	0.0553946	0.861285	0.667882	0.637188	0.0262247	0.140223	0.0604862	0.242674	0.307015	0.182316	0.200508	0.155292	0.179048	0.0252733	0.892638	0.341389	0.224439	0.871575	0.483871	0.239516	0.144893	0.142225	0.4366	0.138333	0.0337481	0.199464	0.0253429	0.0186863	0.0202368	0.829545	0.0331013	0.00966066	0.0153492
GCF_000190535_1	0.333313	0.303858	0.0597058	0.1523	0.0352629	0.167206	0.400977	0.0283618	0.0149157	0.00227899	0.0550522	0.0815655	0.0113943	0.479696	0.456616	0.0202566	0.174653	0.160889	0.0581945	0.388877	0.0211951	0.0144749	0.00452839	0.36505	0.0527921	0.170738	0.0900264	0.0348005	0.0187818	0.0857398	0.0197888	0.0161533	0.203721	0.00167521	0.000544363	0.000819618	0.128151	0.455556	0.505946	0.00321518	0.0272318	0.151306	0.376735	0.555709	0.751863	0.750749	0.74549	0.730145	0.0700746
GCF_000191405_1	0.00203347	0.0166362	0.000418849	0	0.000489521	0.00586105	0.00397176	0.00018092	0.000857957	0.00386858	0.000963022	0.000498472	0.000882456	0.453478	0.00308883	0.00123534	0.00252534	0.00935083	0.0527344	0.0196882	0	0.00219507	0.000139459	0.0783007	0.00885047	0.00386387	0.00118776	0.00131355	0.0209123	0.00361981	0.00156562	0.000338283	0.147694	0.568126	0.00165514	9.89406e-05	0.00018092	0.000913081	0.000874447	0.103821	0.00179365	0.00303088	0.000263371	0.00429826	0.000454185	0.0130413	0.00297246	0.00169613	0.000132392
GCF_000205025_1	0.0105156	0.180235	0.00163463	0.019767	0.0236114	0.00182954	0.00337008	0.00178639	0.0043747	0.00147934	0.00225651	0.011632	0.00192081	0.178885	0.0124106	0.124812	0.00111251	0.0288022	0.109758	0.0171023	0.00118078	0.000845084	0.00319887	0.0235279	0.00154372	0.00160421	0.00156884	0.0146972	0.00119599	0.118722	0.000865601	0.00159926	0.0708887	0.00137959	0.000891778	0.00126427	0.0898761	0.0241137	0.116691	0.0127346	0.00211041	0.0100922	0.00470226	0.394124	0.0543178	0.122402	0.78446	0.0921499	0.00189958
GCF_000210575_1	0.653839	0.742289	0.0323664	0.367993	0.038537	0.219933	0.35926	0.00754627	0.0194443	0.00304147	0.389019	0.585826	0.144661	0.619728	0.799923	0.0851767	0.28949	0.210972	0.371736	0.21254	0.0422741	0.0540558	0.0184959	0.17854	0.366338	0.28289	0.0517993	0.0892311	0.0168742	0.404786	0.00131028	0.029635	0.332701	0.00279966	0.000805938	0.00107804	0.323761	0.598887	0.140503	0.0170557	0.0376737	0.649605	0.729898	0.777649	0.496615	0.746578	0.14438	0.887081	0.161046
GCF_000210895_1	0.00159329	0.0212341	0.000795927	0.000636358	0.000436059	0.00607703	0.00367152	0.00032968	0.00099431	0.000696256	0.000698652	0.000307158	0.000789218	0.383039	0.00204804	0.00137622	0.000987601	0.00916346	0.0524996	0.00805942	0.00028847	0.00184151	0.000438455	0.0565391	0.0104798	0.00154346	0.00203798	0.00141456	0.0138379	0.00559641	0.00130722	0.000616712	0.150055	0.413913	0.000736029	0.000259239	0.000291824	0.000622462	0.00103839	0.054146	0.000322013	0.00340797	0.000228092	0.00471135	0.000184966	0.0141388	0.00255981	0.00262594	0.000111171
GCF_000225345_1	0.384465	0.885331	0.146934	0.0721868	0.130034	0.121316	0.258178	0.206869	0.644717	0.166955	0.256825	0.551033	0.171231	0.896084	0.846065	0.232123	0.424472	0.260652	0.737252	0.881156	0.0604667	0.142516	0.32653	0.804164	0.119302	0.528324	0.526435	0.156969	0.0684456	0.168295	0.0494699	0.358561	0.21229	0.0612451	0.0318076	0.0818243	0.859909	0.351706	0.480047	0.0474652	0.0885142	0.598677	0.257343	0.647036	0.873371	0.837505	0.21072	0.543892	0.163763
GCF_000231275_1	0.000984471	0.245134	0.00295341	0.00230808	0.00254316	0.000787226	0.0151878	0.0409708	0.0328074	0.000254701	0.145846	0.0137584	0.00475664	0.374064	0.168727	0.00876144	0.000380826	0.0374635	0.0113554	0.00292468	0.000429173	0.00302138	0.000586128	0.00946879	0.012336	0.458328	0.00104508	0.0153273	0.0700796	0.00526149	0.000288334	0.0477857	0.00571624	0.000156955	0.000119117	0.00140629	0.0222511	0.233824	0.020868	0.000863952	0.00318884	0.542092	0.00857085	0.508717	0.00660647	0.237173	0.0165065	0.00740771	0.0605534
GCF_000233955_1	0.0110175	0.0131912	0.0876664	0.00269983	0.0253068	0.502616	0.0874111	0.00370666	0.00700171	0.0478412	0.202183	0.418108	0.0282744	0.0282269	0.0281206	0.012542	0.0101232	0.110739	0.315448	0.0288269	0.00156556	0.0278727	0.00411275	0.0179815	0.188683	0.00830494	0.0282802	0.0422315	0.158345	0.26587	0.000282968	0.00183317	0.0178286	0.00338985	5.80816e-05	0.00842999	0.0175332	0.0178543	0.0316004	0.00693835	0.0714518	0.0238958	0.0182076	0.0324806	0.0231712	0.0365107	0.0221087	0.0543617	0.00667818
GCF_000239295_1	0.0686379	0.141612	0.290412	0.496749	0.0799257	0.0695841	0.051176	0.0166096	0.0465766	0.102329	0.0566831	0.136545	0.117086	0.0383357	0.0691125	0.0853017	0.420986	0.0749288	0.182293	0.0803416	0.0221446	0.0270682	0.234492	0.704894	0.160719	0.12106	0.0268267	0.0857964	0.267149	0.0557025	0.0116837	0.0237371	0.044341	0.00618211	0.015417	0.00884213	0.15751	0.0550893	0.0758461	0.0852026	0.0275393	0.506013	0.258156	0.223716	0.179984	0.456747	0.456105	0.117824	0.145094
GCF_000265365_1	0.311261	0.149584	0.0092391	0.674785	0.19535	0.0294124	0.0289197	0.0147398	0.0438619	0.00131861	0.174239	0.0733475	0.145798	0.128799	0.723197	0.00835485	0.615148	0.174757	0.618779	0.177572	0.0321	0.0223984	0.613471	0.327094	0.0575202	0.0471022	0.0437939	0.0592841	0.103369	0.153424	0.00150713	0.00883928	0.0503107	0.000448016	0.000393655	0.00151731	0.19456	0.0923471	0.176544	0.0182894	0.0171657	0.61091	0.0876462	0.871045	0.442487	0.591501	0.737687	0.857148	0.204886
GCF_000296465_1	0.873422	0.875148	0.0254057	0.00972994	0.0289021	0.131809	0.814577	0.108506	0.254223	0.0623989	0.320897	0.375846	0.93759	0.677793	0.852062	0.0660015	0.597092	0.662265	0.0223258	0.759296	0.0252629	0.06619	0.00555619	0.0646231	0.0554841	0.749554	0.0361941	0.219133	0.420236	0.373401	0.00128894	0.0495586	0.811472	0.000276721	0.00130491	0.00135021	0.509046	0.842252	0.333455	0.0093121	0.0436603	0.869738	0.896934	0.926133	0.902071	0.910193	0.940996	0.934804	0.325982
GCF_000297775_1	0.000777	0.00157711	0.00123887	0.000872382	0.00556483	0.0332569	0.00351484	0.000458202	0.00157601	0.00153786	0.0445483	0.0031036	0.00447674	0.00106608	0.152379	0.00114606	0.190577	0.121681	0.00141496	0.00503839	0.00409961	0.00166369	0.000966297	0.00083533	0.00140432	0.00209438	0.00188527	0.00929575	0.000759024	0.000910535	0.00140542	0.002072	0.00138891	0.00298363	0.00015518	0.000933647	0.00157491	0.181935	0.00210135	0.00151328	0.0153804	0.00273711	0.111203	0.00274518	0.0130567	0.776935	0.00116183	0.240392	0.0104242
GCF_000311925_1	0.607786	0.706961	0.0524608	0.0119876	0.0755982	0.020785	0.183336	0.0487876	0.00470655	0.00132409	0.321171	0.226868	0.0740455	0.829655	0.522489	0.0343303	0.0481064	0.326524	0.0451946	0.363614	0.00573763	0.0166098	0.00561183	0.0521871	0.130692	0.339221	0.0462778	0.0523404	0.0404387	0.320236	0.00496069	0.0217017	0.0456115	0.00108861	0.00111832	0.000831628	0.361546	0.772682	0.682638	0.00741732	0.0211397	0.813362	0.584736	0.830411	0.739715	0.848479	0.891087	0.877221	0.234235
GCF_000312145_1	0.0397495	0.0781681	0.00783949	0.0257419	0.0131755	0.215755	0.0445452	0.0030787	0.00897026	0.00136723	0.0620954	0.0375009	0.0767842	0.0520021	0.162994	0.0112268	0.0492684	0.0572024	0.0247553	0.0650009	0.0122448	0.00730086	0.0929787	0.0142854	0.0245193	0.0258843	0.0247396	0.0117256	0.0022384	0.0276951	0.000696434	0.0121438	0.13477	0.000276284	0.000776083	0.000392024	0.0945625	0.334073	0.0386884	0.00623879	0.00720553	0.0883441	0.329245	0.124722	0.182462	0.449912	0.0893514	0.600334	0.0669692
GCF_000321205_1	0.0223255	0.00152913	0.0366952	0.00423807	0.0149224	0.021792	0.0087739	0.0462778	0.00270639	0.000781815	0.00395265	0.0812593	0.395015	0.745058	0.828752	0.00112279	0.00164098	0.183932	0.251846	0.324405	0.0135752	0.0183917	0.00243768	0.00960328	0.0643626	0.00213374	0.0051477	0.0167761	0.000915446	0.268397	0.00359424	0.00253718	0.0211627	0.000320279	0.00089039	0.00046553	0.127019	0.291376	0.182239	0.00128801	0.0768571	0.00311128	0.857062	0.012399	0.779754	0.814849	0.0242991	0.296047	0.521977
GCF_000332875_2	0.907003	0.939818	0.929482	0.797794	0.8169	0.867692	0.885738	0.92596	0.897518	0.887415	0.91224	0.912217	0.81537	0.904325	0.89547	0.875012	0.900468	0.816409	0.892268	0.889326	0.866268	0.900451	0.870679	0.874985	0.873146	0.802124	0.919351	0.917217	0.799803	0.892376	0.861406	0.728553	0.784805	0.701552	0.818997	0.860338	0.907642	0.881384	0.903686	0.894521	0.872982	0.08511	0.753114	0.424923	0.882317	0.843115	0.897265	0.41458	0.766405
GCF_000374505_1	0.25615	0.756014	0.0125174	0.0226469	0.257037	0.0338805	0.0788722	0.270785	0.0570104	0.00424172	0.0250959	0.362099	0.800744	0.475539	0.730044	0.0275268	0.761867	0.69899	0.21484	0.588798	0.330263	0.0183912	0.0181527	0.367411	0.589985	0.1043	0.048828	0.211599	0.0271926	0.350882	0.0461591	0.0661493	0.449191	0.00111081	0.0022167	0.0114286	0.626727	0.762591	0.792911	0.20678	0.0121113	0.552845	0.51637	0.819125	0.744822	0.790402	0.705142	0.808403	0.299875
GCF_000381365_1	0.0186024	0.0126494	0.00511452	0.00221637	0.0254616	0.048432	0.02157	0.00227676	0.00621754	0.0028752	0.0181151	0.0277299	0.0137266	0.0229403	0.0293911	0.00517454	0.0256202	0.0215989	0.0123839	0.016081	0.00163298	0.00136301	0.003953	0.0169346	0.217237	0.0144477	0.00379704	0.0128429	0.0100475	0.016281	0.00402243	0.00206982	0.012903	0.00031606	0.000234035	0.000490833	0.0188462	0.0208624	0.0528279	0.00888975	0.0108662	0.0225785	0.0625765	0.740081	0.0301325	0.0469202	0.0451821	0.0683997	0.122615
GCF_000382445_1	0.0468102	0.0219177	0.0456021	0.00235977	0.0296816	0.102874	0.0400361	0.00789956	0.0215673	0.156343	0.201596	0.755529	0.0237116	0.0807456	0.760759	0.0485232	0.0587182	0.325205	0.768423	0.22312	0.00388575	0.017465	0.00546639	0.0778951	0.354933	0.0438118	0.0154291	0.14731	0.0632839	0.289418	0.0138577	0.0528106	0.233273	0.0039275	0.00145452	0.00647625	0.0835025	0.64777	0.0911072	0.0110354	0.0251801	0.0775383	0.74166	0.131834	0.471758	0.785795	0.77704	0.0767482	0.0316721
GCF_000424325_1	0.0156608	0.0300927	0.0110326	0.0853016	0.014765	0.0138913	0.0165279	0.0134711	0.0137845	0.0139012	0.0208696	0.0192265	0.0255915	0.0127485	0.027516	0.022631	0.0137244	0.0193613	0.0188102	0.0247109	0.0236519	0.0146044	0.0246178	0.0684062	0.017047	0.0143801	0.0139583	0.0235268	0.334527	0.00977956	0.0109537	0.0144885	0.0176802	0.00999663	0.0734853	0.00533181	0.0336519	0.0184878	0.0293832	0.0204936	0.0152062	0.093249	0.0250303	0.0187689	0.0252405	0.0324533	0.0245622	0.0166458	0.0196455
GCF_000425045_1	0.00823933	0.0054704	0.00468309	0.000437246	0.0250466	0.00234045	0.00651488	0.00175775	0.000847767	0.000477115	0.00435099	0.00189444	0.0114341	0.00474136	0.0034432	0.00393653	0.0020675	0.580127	0.00204428	0.00633744	0.00697579	0.0013205	0.000416216	0.344833	0.00109399	0.00311242	0.00165523	0.0635738	0.00136168	0.00246093	0.00130692	0.00225896	0.00158294	0.003827	0.000409206	0.000477553	0.00251789	0.00465461	0.0106788	0.00260508	0.000720273	0.65363	0.0041626	0.0031834	0.0163564	0.975976	0.00617227	0.00194439	0.00228788
GCF_000448565_1	0.107877	0.0702525	0.236355	0.0391563	0.223876	0.00974217	0.00512381	0.0361254	0.0102339	0.286769	0.0415135	0.0224605	0.0122595	0.0726482	0.495939	0.011952	0.0230349	0.399268	0.393833	0.683583	0.0571809	0.102655	0.0295696	0.503938	0.228076	0.0731918	0.165688	0.136282	0.0636287	0.017203	0.703848	0.348774	0.230849	0.519887	0.313651	0.13814	0.0603335	0.0434346	0.14324	0.285647	0.0178314	0.0772812	0.00435494	0.0170004	0.00509811	0.45289	0.0227744	0.0142243	0.0113986
GCF_000468015_1	0.0202266	0.0777762	0.0229131	0.00598901	0.0212423	0.661787	0.0214383	0.394572	0.0112806	0.0114068	0.0458518	0.0260501	0.205571	0.0670255	0.0637736	0.8941	0.0259015	0.0175249	0.129776	0.117048	0.00968886	0.0210709	0.00943169	0.0140809	0.0118262	0.410822	0.150424	0.0273701	0.0068431	0.820917	0.00440438	0.0813346	0.831941	0.0133578	0.00881201	0.0104529	0.0154122	0.0930158	0.039234	0.00635054	0.0156974	0.0153202	0.0390471	0.709854	0.147677	0.0131452	0.0173841	0.0931709	0.116329
GCF_000469345_1	0.796321	0.351126	0.8462	0.088971	0.102095	0.857819	0.0741714	0.842771	0.861122	0.398665	0.361607	0.797142	0.621087	0.667486	0.797168	0.0994165	0.809804	0.138891	0.782178	0.852619	0.0621209	0.816811	0.829386	0.776272	0.779363	0.775305	0.829161	0.242732	0.0418287	0.75963	0.787923	0.791554	0.282322	0.148175	0.0582792	0.209133	0.753733	0.58518	0.831708	0.072258	0.85565	0.0905586	0.442707	0.258523	0.618779	0.0904925	0.786328	0.740529	0.490978
GCF_000473955_1	0.00241853	0.00894934	0.00182028	0.000114189	0.00109669	0.00567072	0.0518123	0.00238506	0.000498148	0.000227205	0.00547757	0.00255385	0.00226882	0.0498192	0.0103874	0.00139875	0.00347881	0.0267244	0.0045617	0.0374987	0.000766742	0.000619089	0.00124816	0.00212733	0.00840598	0.0144243	0.00455466	0.0042027	0.00130892	0.00147037	0.0128018	0.000229259	0.0118628	0.000107438	0	0.000170844	0.0132304	0.0369287	0.0164715	0.000518989	0.00525154	0.00926079	0.0152077	0.334292	0.115222	0.275115	0.00471229	0.205753	0.00326893
GCF_000484655_1	0.795713	0.823976	0.806731	0.759302	0.690369	0.615864	0.615732	0.84081	0.809003	0.788856	0.806851	0.817201	0.710664	0.739942	0.748668	0.757101	0.767739	0.807463	0.793023	0.826799	0.774727	0.83336	0.786406	0.865399	0.77658	0.749677	0.767238	0.830307	0.793675	0.742027	0.745632	0.755583	0.729926	0.467237	0.718523	0.749216	0.820842	0.766025	0.751643	0.724354	0.792677	0.776974	0.600024	0.59269	0.822825	0.751402	0.709976	0.718599	0.665322
GCF_000508885_1	0.0977652	0.15422	0.269608	0.459597	0.0971798	0.0968997	0.067265	0.0305956	0.0793195	0.0884425	0.105696	0.183644	0.182312	0.0685352	0.107227	0.110989	0.43678	0.128029	0.291233	0.123194	0.0365542	0.0529534	0.229681	0.649907	0.201473	0.179554	0.0334278	0.109704	0.317309	0.0679688	0.0159965	0.0465222	0.0569144	0.0158229	0.0225495	0.00915694	0.187435	0.0876423	0.114379	0.103079	0.0461156	0.561977	0.325521	0.301989	0.268982	0.579445	0.490215	0.131101	0.174564
GCF_000519105_1	0.194777	0.000408448	0.00268787	0.000294413	0.00558983	0.14133	0.160951	0.00211791	0.0444734	0.000676154	0.0307828	0.00688088	0.0014833	0.0230357	0.149371	0.00602011	0.0103492	0.137655	0.072439	0.0898847	0.0153076	0.00120182	0.00122683	0.00576766	0.00471083	0.0104675	0.0183643	0.0218336	0.000593914	0.119178	0.000701802	0.0115408	0.0148904	0.000465254	0.000146677	0.000104921	0.193355	0.0298165	0.0259527	0.00155452	0.0206988	0.012532	0.422793	0.553662	0.250807	0.700551	0.797058	0.349815	0.0450539
GCF_000614125_1	0.269375	0.0106161	0.0656219	0.00484829	0.0449272	0.275406	0.0882425	0.0533733	0.00768907	0.0208211	0.0521047	0.187263	0.23613	0.248677	0.239159	0.146421	0.35328	0.143164	0.234405	0.231207	0.0173541	0.0347533	0.00454868	0.0179121	0.20635	0.136365	0.0320883	0.0595143	0.254707	0.118549	0.043739	0.0174488	0.0875453	0.0117676	0.000594509	0.00226123	0.242337	0.239655	0.269568	0.00591722	0.0807402	0.19343	0.284023	0.365195	0.323026	0.328061	0.288738	0.29032	0.191664
GCF_000723465_1	0.800062	0.866077	0.277952	0.0306889	0.155805	0.132375	0.0501496	0.487136	0.0193711	0.0109503	0.796752	0.736973	0.0288536	0.0288927	0.455364	0.787849	0.821706	0.0253407	0.139461	0.816843	0.0166283	0.166442	0.403753	0.739226	0.01559	0.929115	0.821594	0.0804376	0.00711774	0.687442	0.00417214	0.35015	0.544711	0.0776827	0.00559272	0.0154047	0.795387	0.719836	0.0855408	0.0182153	0.776132	0.492475	0.858645	0.861066	0.830844	0.0214324	0.812437	0.840572	0.928037
GCF_000742135_1	0.0037524	0.0441231	0.000685746	0.000178875	0.0213764	0.00676622	0.0142546	1.58679e-05	0.000211873	0.00533432	0.0230478	0.00140738	0.00277111	0.00103448	0.00182337	0.000308162	0.00575031	0.876178	0.00519476	0.402228	0.00321001	0.00294855	0.00168651	0.022489	0.00450162	0.783678	0.00202532	0.12238	0.00823076	0.00192471	0.0112522	0.00248459	0.00809498	0.0132286	0.00902289	0.00276282	0.0163492	0.00398303	0.161184	0.311705	0.000165351	0.036194	0.00630353	0.00288832	7.53726e-05	0.0132138	0.00469366	0.0281174	0.00288507
GCF_000752095_2	0.878459	0.823623	0.888916	0.786689	0.828215	0.261886	0.581615	0.873997	0.469734	0.701341	0.568389	0.863231	0.0573817	0.141589	0.59305	0.334249	0.725178	0.237583	0.160201	0.679219	0.0400712	0.840871	0.241291	0.839	0.818425	0.130958	0.145288	0.849412	0.0421985	0.69583	0.0460899	0.44276	0.296612	0.0323688	0.0414208	0.0194572	0.540767	0.803526	0.862818	0.223168	0.0547699	0.0473573	0.176096	0.445209	0.839368	0.530175	0.398689	0.425473	0.096145
GCF_000765235_1	0.717217	0.069563	0.574039	0.0371356	0.059935	0.823302	0.792273	0.337471	0.323677	0.0603678	0.795285	0.713755	0.821577	0.830975	0.798946	0.357622	0.71069	0.0920888	0.0533241	0.750928	0.0379614	0.615562	0.0472577	0.0652952	0.06932	0.784099	0.488848	0.162188	0.0534587	0.538021	0.0196243	0.440888	0.764263	0.216975	0.0169955	0.0272235	0.119778	0.761842	0.543085	0.0233605	0.229484	0.726359	0.671512	0.812076	0.810008	0.108309	0.595068	0.789512	0.181496
GCF_000785515_1	0.440027	0.501343	0.588283	0.428362	0.365025	0.156905	0.0288626	0.760171	0.308682	0.802193	0.302363	0.352754	0.0852396	0.470973	0.889082	0.263367	0.0701308	0.777391	0.861385	0.920858	0.100456	0.664849	0.190705	0.421059	0.886806	0.632596	0.669284	0.508347	0.297383	0.103709	0.916506	0.44285	0.733283	0.76011	0.71904	0.710483	0.453206	0.5343	0.771807	0.373637	0.207369	0.444371	0.121726	0.0790485	0.0387807	0.580975	0.157711	0.0533747	0.0692843
GCF_000803105_1	0.0258238	0.0119826	0.0100903	0.00142435	0.00346724	0.036925	0.0564154	0.00251936	0.00101093	0.00113827	0.0074641	0.016303	0.0114513	0.127335	0.0176032	0.0056853	0.0185368	0.0134843	0.00662737	0.030999	0.000520206	0.00125135	0.00462242	0.00695839	0.00816021	0.0416636	0.00276171	0.0100195	0.0106047	0.00676437	0.00109309	0.000269647	0.02212	0.000675326	0.000253217	4.39747e-05	0.0233532	0.101274	0.0160454	0.00200979	0.00574136	0.0129317	0.0343496	0.0173357	0.0827816	0.0191713	0.0154308	0.016296	0.0122561
GCF_000828055_2	0.000513294	0.00259074	0.00012298	0.00022151	0.0030631	3.87597e-05	0.000155582	3.96653e-05	0.000140368	0.00048522	0.00123469	0.000144353	9.58125e-05	0.000487575	0.000140549	0.000153227	0.0897165	0.905924	0.00130515	0.0277188	0.000392668	0.000383974	0.000562377	0.00711838	0.0144762	0.0743492	0.0100726	0.0298911	0.000699485	0.000564913	0.000406433	0.000105412	0.000496812	0.0032444	0.0001909	0.00170488	0.00143755	0.000178041	0.0354515	0.0186577	0.000209194	0.00744168	0.000334529	0.000118634	1.73875e-05	0.00436372	0.000466384	0.0108132	0.00232105
GCF_000949455_1	0.358741	0.830474	0.196892	0.700348	0.0824042	0.31185	0.382035	0.128623	0.459777	0.472701	0.391173	0.608514	0.394412	0.46751	0.78253	0.180381	0.344916	0.802005	0.491414	0.179752	0.436608	0.246023	0.465097	0.8134	0.304721	0.620126	0.715012	0.212503	0.85106	0.316981	0.670973	0.251443	0.219955	0.0269907	0.0339862	0.0187485	0.581514	0.728228	0.783467	0.336265	0.227472	0.827185	0.796322	0.351945	0.333793	0.802803	0.42991	0.605256	0.743672
GCF_000963275_1	0.126958	0.0890645	0.30243	0.0463974	0.255622	0.0173718	0.00539253	0.0389095	0.0108747	0.350617	0.0538853	0.024477	0.0174566	0.083773	0.538824	0.0164726	0.0287792	0.452492	0.458065	0.781392	0.0577958	0.128886	0.0400351	0.504698	0.289438	0.103815	0.189885	0.174198	0.0844282	0.0197769	0.801223	0.427248	0.270426	0.588334	0.327942	0.137105	0.0816181	0.0589986	0.146038	0.361125	0.0196278	0.113483	0.00310133	0.0207004	0.00725057	0.606636	0.0306015	0.0163191	0.00897374
GCF_000969835_1	0.00571179	0.0016008	0.00124253	0.00136617	0.00133102	0.00328978	0.0718991	0.000369214	0.000245269	0.000234169	0.00190912	0.00621651	0.00182973	0.0204595	0.00653609	0.0254018	0.00685258	0.00319266	0.00105785	0.00136	0.00135353	0.000745673	0.00581739	0.00175727	0.0100477	0.00380668	0.088568	0.0044076	0.000667206	0.0039798	0.00041392	0.000147223	0.00409141	0.000105754	3.46861e-05	0	0.00243666	0.00445723	0.00732754	0.000776968	0.000627278	0.00145558	0.00437306	0.00493452	0.00306347	0.00830137	0.00802188	0.00782564	0.0286232
GCF_001073155_1	0.113068	0.0847909	0.259742	0.044388	0.21848	0.0163468	0.00497148	0.0575444	0.0148857	0.311063	0.049005	0.0273828	0.0158461	0.0857286	0.620462	0.0166229	0.0309734	0.417844	0.430416	0.720117	0.0514634	0.120134	0.0390545	0.496372	0.257131	0.0818941	0.173797	0.143074	0.0709959	0.0282097	0.709295	0.339263	0.244633	0.54976	0.309642	0.141112	0.0698028	0.0591005	0.155056	0.308347	0.0231905	0.126597	0.00907459	0.0210795	0.0122843	0.483502	0.0308247	0.0175715	0.0194263
GCF_001074805_1	0.0825772	0.0678681	0.246516	0.0311135	0.165061	0.0115401	0.00441361	0.0513883	0.00873011	0.473039	0.0325633	0.0446342	0.0131368	0.089319	0.563463	0.0349674	0.0309915	0.358743	0.612957	0.657384	0.074138	0.0966576	0.0289704	0.37807	0.221681	0.078299	0.16046	0.124461	0.0616111	0.0177129	0.612016	0.314998	0.196982	0.447434	0.316584	0.123537	0.0563598	0.0391127	0.103185	0.255516	0.0190942	0.0644731	0.00448496	0.0155841	0.0057719	0.406425	0.0206297	0.0112971	0.00842034
GCF_001304995_1	0.0152255	0.0228636	0.0131581	0.164028	0.00899901	0.0138595	0.0183111	0.0114775	0.0186792	0.0196508	0.0174609	0.0207595	0.0213315	0.0213274	0.0211547	0.0169824	0.0166	0.0246608	0.0115251	0.0215624	0.0197714	0.013407	0.0103673	0.0217828	0.245805	0.0168681	0.0185938	0.0570393	0.0189465	0.0138012	0.0133953	0.01595	0.0168512	0.00723147	0.00402417	0.00705732	0.0280207	0.0236724	0.0253681	0.012078	0.010302	0.023444	0.020805	0.0218403	0.022072	0.0214532	0.0212636	0.0181296	0.0160501
GCF_001312505_1	0.816882	0.760913	0.825617	0.68954	0.738651	0.674198	0.424139	0.856866	0.701131	0.833707	0.769668	0.801158	0.737733	0.560419	0.785476	0.792413	0.846744	0.571213	0.616869	0.540251	0.116272	0.842794	0.757718	0.784826	0.799386	0.415306	0.844816	0.843251	0.0652405	0.821201	0.804472	0.769911	0.8292	0.745243	0.0737446	0.768879	0.779945	0.834067	0.819022	0.17835	0.751439	0.149011	0.776681	0.646983	0.74535	0.677934	0.207676	0.768103	0.784912
GCF_001314995_1	0.144455	0.300699	0.110809	0.00596602	0.148166	0.170613	0.168934	0.0683474	0.0332062	0.253973	0.498656	0.307129	0.014821	0.353046	0.404301	0.310917	0.622076	0.285727	0.335503	0.20998	0.0843345	0.0512396	0.320567	0.678693	0.192194	0.196708	0.0363914	0.24997	0.519175	0.308826	0.032633	0.00731651	0.12732	0.00260812	0.00593419	0.00649456	0.188534	0.348238	0.36214	0.213139	0.16558	0.726618	0.366802	0.619509	0.470458	0.753305	0.720559	0.490664	0.162823
GCF_001404655_1	0.757352	0.263034	0.17998	0.164161	0.115894	0.910159	0.285741	0.638861	0.912325	0.159463	0.906092	0.922609	0.122249	0.386639	0.867511	0.161677	0.933234	0.229149	0.904688	0.290578	0.141466	0.943266	0.175967	0.242836	0.212096	0.107396	0.435462	0.570063	0.16245	0.661696	0.907243	0.882653	0.204418	0.0823381	0.159176	0.845507	0.180395	0.170218	0.626816	0.219963	0.176517	0.0288226	0.901261	0.87689	0.188159	0.786412	0.274508	0.147366	0.85849
GCF_001404675_1	0.045778	0.0461631	0.10699	0.0423576	0.0744003	0.0999459	0.0341689	0.841282	0.0402016	0.0376758	0.0541789	0.0440511	0.88575	0.0863482	0.790939	0.0378251	0.0501632	0.0350401	0.0385013	0.887611	0.0215354	0.0546223	0.0425192	0.0358844	0.0323659	0.891173	0.912059	0.0357983	0.013953	0.153646	0.0223389	0.498309	0.427114	0.0149751	0.0170864	0.0270648	0.0497432	0.884819	0.0601054	0.0632042	0.0391183	0.0387238	0.0344384	0.196845	0.880967	0.0328255	0.0376427	0.125235	0.0444446
GCF_001404875_1	0.834947	0.811935	0.838001	0.125288	0.325774	0.772799	0.11359	0.834418	0.366926	0.708404	0.838539	0.804378	0.320444	0.796398	0.797907	0.762659	0.295961	0.475927	0.326022	0.776746	0.323376	0.838174	0.782331	0.7408	0.828393	0.281181	0.793648	0.865436	0.120362	0.7639	0.796296	0.829989	0.661174	0.737681	0.103317	0.351785	0.804073	0.795924	0.861781	0.325019	0.322333	0.355969	0.65146	0.459337	0.821986	0.223688	0.138739	0.718641	0.633176
GCF_001405555_1	0.871427	0.866134	0.888728	0.0992312	0.701445	0.885777	0.622914	0.913161	0.891769	0.80031	0.843333	0.885462	0.870818	0.833666	0.883685	0.919868	0.892419	0.829831	0.859936	0.877023	0.104396	0.880917	0.823136	0.788156	0.827774	0.813622	0.839163	0.878731	0.0776733	0.839826	0.0839257	0.884838	0.866207	0.772641	0.0622791	0.831463	0.834102	0.889872	0.815513	0.113367	0.873671	0.843447	0.787497	0.869547	0.868457	0.802568	0.847241	0.873954	0.835907
GCF_001405615_1	0.401453	0.676584	0.786647	0.0601128	0.114803	0.370863	0.169087	0.10992	0.190375	0.353032	0.703997	0.791795	0.801271	0.852543	0.763872	0.107421	0.773584	0.395002	0.0819202	0.796507	0.0415256	0.0736732	0.708748	0.118203	0.629811	0.113568	0.354521	0.204423	0.0236629	0.702294	0.031517	0.538047	0.73387	0.030137	0.0192962	0.512354	0.86281	0.774009	0.510983	0.0375853	0.653271	0.698445	0.612605	0.777046	0.776494	0.733752	0.75912	0.750553	0.318964
GCF_001414325_1	0.453479	0.0570904	0.0426161	0.0223345	0.0264113	0.0379962	0.0415352	0.0331515	0.0495902	0.526931	0.0391536	0.424653	0.0365484	0.429537	0.0457791	0.0395229	0.0347573	0.0353755	0.0414368	0.388478	0.0190879	0.0859773	0.0253806	0.028152	0.0656339	0.233972	0.0476245	0.0856977	0.0122493	0.0513303	0.0140792	0.114458	0.0459359	0.0158825	0.0108929	0.0196933	0.0697656	0.0859679	0.0977547	0.0165298	0.0210824	0.0274671	0.046704	0.353612	0.698141	0.0216811	0.492138	0.028267	0.0295876
GCF_001487165_1	0.885771	0.850418	0.865934	0.267764	0.471469	0.838666	0.309917	0.891262	0.856115	0.845842	0.867737	0.845916	0.800892	0.50715	0.654381	0.848895	0.856303	0.784485	0.297855	0.888272	0.126434	0.880993	0.6917	0.614125	0.849044	0.782211	0.862633	0.875353	0.0855516	0.843331	0.113076	0.850087	0.767569	0.744529	0.110124	0.82281	0.82875	0.866566	0.575254	0.832023	0.884622	0.824544	0.580504	0.446506	0.864913	0.809569	0.774658	0.844713	0.837002
GCF_001553315_1	0.0329621	0.045129	0.0265718	0.08247	0.146077	0.020575	0.00802489	0.00194507	0.00639024	0.00935009	0.00282526	0.00120535	0.000974991	0.187081	0.0100898	0.00509255	0.0161672	0.119525	0.0190037	0.00510777	0.00104965	0.00495944	0.01069	0.747903	0.142756	0.00592313	0.0158621	0.0406249	0.03597	0.00907699	0.101635	0.00439654	0.00263125	0.462115	0.00903377	0.0139844	0.00581949	0.00425214	0.00783038	0.033102	0.00114052	0.00643494	0.00077901	0.0474808	0.00213319	0.00405419	0.0213786	0.00211747	0.00320347
GCF_001553335_1	0.0024703	0.0426969	0.0763174	0.0811515	0.77866	0.00836189	0.00140497	0.00144944	0.0198631	0.0660844	0.000974927	0.0037619	0.00055368	0.4648	0.0635154	0.0391539	0.0467598	0.292736	0.00919363	0.0207628	0.00143234	0.038501	0.0051439	0.573377	0.192051	0.0245999	0.000957334	0.0293162	0.468236	0.00927035	0.0116786	0.0100088	0.00164442	0.66387	0.203158	0.00951372	0.00220934	0.00389873	0.0351614	0.0273497	0.00311683	0.0068714	0.00541903	0.0465248	0.0227155	0.00467036	0.100648	0.0016801	0.00664172
GCF_001556435_1	0.294837	0.543997	0.488875	0.2863	0.381842	0.101644	0.0283286	0.571585	0.227877	0.763623	0.194646	0.464212	0.178809	0.439355	0.915068	0.253116	0.102727	0.834894	0.87374	0.887029	0.218764	0.44445	0.192055	0.384922	0.810147	0.412088	0.744312	0.624118	0.161051	0.134753	0.935708	0.575027	0.605998	0.890579	0.541892	0.611144	0.481885	0.455976	0.624471	0.362342	0.0970246	0.387037	0.130573	0.0775189	0.0261769	0.576641	0.11028	0.0281499	0.0383609
GCF_001679485_1	0.000950712	0.0227578	0.000583913	0.000699166	9.13411e-05	0.00496876	0.00310464	0.000563828	0.000650387	0.000968885	0.000720208	0.000139164	0.000833547	0.294032	0.00145333	0.00141124	0.00143802	0.00799258	0.062757	0.00829817	0	0.00205972	0.000629345	0.0828277	0.0090002	0.00124386	0.00182204	0.00199563	0.0145997	0.00566936	0.000406013	0.000430881	0.152587	0.36567	0.000780464	7.74725e-05	0.000336192	0.00070347	0.000618345	0.0501835	0.000229548	0.00171396	0.000183639	0.00467991	0.00022907	0.0136605	0.00273115	0.00152028	0
GCF_001815355_1	0.00110678	0.0273113	0.000914251	0.00100894	0.000150972	0.00959964	0.0048106	0.000547078	0.00118095	0.00156128	0.000597051	0.000153077	0.000743816	0.479461	0.00198579	0.00111046	0.00139978	0.0145712	0.0785946	0.00886582	9.57386e-05	0.00160336	0.000337715	0.0950232	0.0138106	0.00151762	0.00232245	0.00196632	0.0169894	0.00627719	0.00104208	0.000145712	0.285496	0.515776	0.00156548	0.000153077	0.000252497	0.00178642	0.000635452	0.0844373	0.000491318	0.00226301	0.000150972	0.00700102	0.000202524	0.0218968	0.00407783	0.00234349	9.88949e-05
GCF_002161215_1	0.0440794	0.052525	0.0353176	0.0611743	0.0229801	0.0545907	0.0832847	0.017766	0.0123073	0.0225328	0.066932	0.0650835	0.312262	0.0692087	0.0845389	0.0306794	0.0373542	0.049498	0.0217936	0.0601027	0.0252173	0.0338337	0.0302694	0.0506193	0.0463452	0.16309	0.0296902	0.0315779	0.0501797	0.0798366	0.0242258	0.0714781	0.0414636	0.0055916	0.00359004	0.00661633	0.67427	0.0685991	0.12749	0.0138582	0.0297978	0.0895864	0.0733127	0.104357	0.109499	0.18756	0.545948	0.0764673	0.0924795
GCF_002161485_1	0.0240148	0.00321251	0.00124147	0.000314207	0.00357106	0.0869464	0.0174616	0.000770066	0.00557223	0.000256433	0.00366184	0.00898321	0.0048584	0.00590832	0.0137447	0.00330886	0.00360042	0.0174077	0.00594882	0.0148489	0.00206586	0.000711908	0.000960663	0.00371328	0.0128783	0.0086523	0.00136681	0.00423536	0.00188927	0.0113109	0.000831679	0.00160155	0.0577511	0.000201538	0.000190789	0.000229945	0.0667416	0.125889	0.0169472	0.000790028	0.00205664	0.00232824	0.0285761	0.0753379	0.0338898	0.121843	0.0835276	0.0683491	0.0029342
GCF_002222615_2	0.0236742	0.0120992	0.0537149	0.00796446	0.00358011	0.0579231	0.585566	0.0101208	0.080269	0.00523475	0.21026	0.0115695	0.00749103	0.715572	0.457614	0.0744773	0.0141507	0.241066	0.680907	0.0961234	0.00343485	0.0821788	0.0169996	0.0438341	0.361777	0.008185	0.386787	0.145424	0.0196469	0.520914	0.00291327	0.00127505	0.612997	0.00047344	0.00105321	0.00843134	0.0165842	0.34939	0.87998	0.00466548	0.262224	0.907203	0.83771	0.897006	0.295429	0.035783	0.97137	0.871315	0.296933
GCF_002224675_1	0.00142889	0.000828759	0.00452732	0.000629314	0.0325044	0.139939	0.0666225	0.00196859	0.21722	0.000733517	0.0187478	0.00758761	0.0201516	0.0172411	0.00679239	0.0386746	0.00370624	0.131641	0.0204993	0.00500481	0.000318497	0.00176274	0.00865242	0.00749057	0.00404932	0.00122406	0.0993069	0.167196	0.00277123	0.0456337	0.000551482	0.00547001	0.00634946	0.00141634	0.00182675	0.551421	0.00269315	0.00801645	0.141533	0.0460031	0.0122739	0.0545936	0.0318838	0.00921056	0.0088342	0.0151138	0.00750005	0.0831214	0.0057839
GCF_002234575_2	0.036832	0.113832	0.0191704	0.103866	0.0417006	0.0242663	0.0322966	0.0189062	0.0476662	0.0489473	0.0253816	0.0325062	0.142169	0.0312454	0.111229	0.0377154	0.0428273	0.0629047	0.170203	0.10539	0.0552587	0.0249302	0.060777	0.712628	0.0336413	0.0243425	0.0540817	0.0464108	0.923699	0.0232032	0.0581575	0.0251086	0.0240711	0.0133648	0.0155179	0.0156316	0.0441243	0.0373138	0.0402167	0.0617756	0.0226671	0.307247	0.166493	0.027259	0.113833	0.372712	0.0437043	0.077562	0.0422873
GCF_002549755_1	0.369949	0.800783	0.8377	0.0992347	0.0753591	0.685752	0.164111	0.191044	0.343861	0.70797	0.793776	0.858494	0.772259	0.850426	0.906398	0.907897	0.718181	0.737135	0.278009	0.741428	0.0522127	0.86257	0.0609628	0.284545	0.787489	0.485716	0.734401	0.69336	0.0430029	0.61773	0.0243552	0.760858	0.827568	0.132804	0.0279804	0.128286	0.858752	0.788502	0.518854	0.117604	0.768337	0.716763	0.288818	0.816254	0.838903	0.548109	0.904636	0.818624	0.722517
GCF_002549775_1	0.139279	0.226844	0.243477	0.060831	0.0550625	0.181776	0.335644	0.264826	0.133139	0.109627	0.822511	0.242942	0.19104	0.221041	0.234656	0.26509	0.179396	0.129765	0.135955	0.184525	0.0266266	0.840555	0.0247891	0.0977494	0.19421	0.164662	0.168303	0.140363	0.0278581	0.122871	0.0344729	0.624121	0.240355	0.0489592	0.0109535	0.0646287	0.213677	0.196836	0.130552	0.0540585	0.165467	0.122329	0.091717	0.207958	0.242141	0.155277	0.242222	0.910683	0.180527
GCF_002549975_1	0.17755	0.860617	0.267958	0.0953279	0.0761295	0.712648	0.214463	0.137564	0.839872	0.102843	0.558599	0.30727	0.221554	0.286646	0.253369	0.266312	0.219201	0.142639	0.189307	0.193278	0.0344741	0.233876	0.051819	0.126365	0.205002	0.746316	0.193096	0.162821	0.0450455	0.171029	0.0132818	0.8131	0.227085	0.0815588	0.0185708	0.0809163	0.232988	0.311128	0.138015	0.0500236	0.1909	0.137514	0.692919	0.219876	0.264537	0.176443	0.276807	0.244424	0.86236
GCF_002550015_1	0.414487	0.219058	0.664335	0.0685316	0.151744	0.223556	0.342114	0.459093	0.436185	0.0971093	0.759728	0.840125	0.543767	0.806703	0.686953	0.435673	0.645309	0.156696	0.161131	0.470938	0.0426901	0.664507	0.0387117	0.14225	0.203308	0.627018	0.611703	0.273539	0.0225662	0.565598	0.0181772	0.42426	0.88112	0.175194	0.0113905	0.0757378	0.215151	0.795819	0.218929	0.05794	0.554152	0.120586	0.29437	0.526309	0.635567	0.438075	0.224078	0.823536	0.366176
GCF_002550035_1	0.835511	0.22702	0.262674	0.0778327	0.0578112	0.194107	0.635648	0.80167	0.203348	0.0945973	0.874612	0.264916	0.215526	0.800502	0.245376	0.269901	0.185105	0.157814	0.811253	0.18786	0.0347691	0.234912	0.0477432	0.118592	0.188472	0.194861	0.191531	0.200654	0.0364958	0.169034	0.0193601	0.178992	0.228013	0.0713306	0.0136563	0.0761156	0.223562	0.214714	0.155555	0.0527895	0.176517	0.142712	0.137151	0.229809	0.257558	0.181456	0.299955	0.220676	0.173366
GCF_002834225_1	0.492459	0.520084	0.0484749	0.0328555	0.389496	0.348614	0.11291	0.518389	0.0222421	0.0100899	0.53846	0.026003	0.54522	0.516722	0.505956	0.542558	0.0195626	0.364755	0.525094	0.527486	0.0110157	0.019317	0.535678	0.0591316	0.505695	0.496801	0.532259	0.201172	0.00294283	0.171379	0.00624227	0.537517	0.333085	0.432828	0.00960044	0.0123741	0.0339076	0.486467	0.0615463	0.138004	0.52852	0.508207	0.51187	0.254865	0.467047	0.487785	0.467851	0.0531024	0.0526623
GCF_002834235_1	0.827189	0.798924	0.120048	0.134677	0.749646	0.744244	0.298124	0.822792	0.095955	0.0558064	0.827227	0.0823911	0.853461	0.837926	0.828063	0.808239	0.0935981	0.742057	0.813344	0.843836	0.0420347	0.0747845	0.798175	0.17019	0.815929	0.791862	0.825714	0.519268	0.0287446	0.430111	0.0328166	0.809319	0.720726	0.763256	0.0467026	0.050459	0.110848	0.82799	0.180513	0.391529	0.806388	0.809715	0.795724	0.615211	0.800136	0.773449	0.809052	0.148471	0.151671
GCF_002849695_1	0.0101674	0.0238011	0.00851953	0.00148323	0.00385933	0.0111062	0.00641905	0.00337997	0.00147777	0.0156196	0.00509554	0.012823	0.0104633	0.0226954	0.0165627	0.00932436	0.0359954	0.0454962	0.00978716	0.0206171	0.00880568	0.00202712	0.0030562	0.0733829	0.0135505	0.0259526	0.0149894	0.0166888	0.00962349	0.0120652	0.00151653	0.000811787	0.00854531	0.00291623	0.110768	0.000172893	0.0163546	0.017678	0.533206	0.0155726	0.00528499	0.792245	0.0161537	0.0705249	0.0384748	0.0604542	0.0586808	0.0261761	0.0164175
GCF_002874775_1	0.0233669	0.0293045	0.0118869	0.93506	0.107814	0.0229639	0.0455191	0.0417824	0.0221859	0.0185369	0.0272778	0.641789	0.813063	0.031192	0.884109	0.0226287	0.824962	0.0995199	0.0149275	0.019594	0.320305	0.0158711	0.0296665	0.0417589	0.0212452	0.0205984	0.0236172	0.080679	0.930607	0.893601	0.0139092	0.0358763	0.721537	0.00879487	0.0105755	0.0215554	0.702172	0.919355	0.950888	0.0335228	0.0185985	0.659278	0.363378	0.0343732	0.0249294	0.0353864	0.248093	0.401994	0.0269147
GCF_002949675_1	0.0342676	0.00167939	0.00651311	0.00559359	0.690275	0.0437896	0.091611	0.00102611	0.00541186	0.00614705	0.0219471	0.197771	0.0610408	0.00265679	0.057027	0.00116349	0.180167	0.796599	0.00454869	0.08849	0.00258318	0.00793913	0.00144765	0.657003	0.0542925	0.0107766	0.0558373	0.733317	0.405045	0.0329251	0.0873661	0.0158892	0.645614	0.502232	0.170437	0.632601	0.278235	0.14102	0.411016	0.162156	0.00639975	0.21632	0.00886565	0.107503	0.00055084	0.73655	0.180378	0.00794459	0.655777
GCF_002950215_1	0.0718681	0.00228885	0.00902801	0.0087759	0.752421	0.0523488	0.108305	0.00190774	0.010986	0.00958185	0.0388794	0.291089	0.0808506	0.00424013	0.066263	0.00154709	0.129682	0.762434	0.00692283	0.13806	0.00395116	0.00941762	0.00269749	0.743602	0.0843631	0.0126446	0.0801833	0.774075	0.434937	0.0566752	0.105053	0.0210773	0.714444	0.535574	0.203589	0.751721	0.300226	0.171791	0.488841	0.176989	0.0140275	0.245856	0.0144339	0.116405	0.00110726	0.683367	0.298823	0.0112211	0.771936
GCF_002959615_1	0.102157	0.14239	0.0844021	0.747232	0.835298	0.0656395	0.0846785	0.107472	0.385623	0.123937	0.0991086	0.138837	0.113611	0.113453	0.121546	0.0677919	0.223567	0.74687	0.861806	0.847518	0.712053	0.156197	0.400178	0.310242	0.191637	0.145016	0.689199	0.21483	0.490031	0.124653	0.607926	0.660257	0.701621	0.734394	0.841481	0.349064	0.185295	0.149941	0.174341	0.851705	0.167789	0.679556	0.324319	0.201063	0.118172	0.0899936	0.332257	0.10409	0.102308
GCF_002959775_1	0.00503588	0.11471	0.00546704	0.0203045	0.0649177	0.0405623	0.00434638	0.00897625	0.0028476	0.00548122	0.00228841	0.00453842	0.00206757	0.341699	0.020892	0.0386186	0.0194312	0.0294526	0.012565	0.0174587	0.00150153	0.0159887	0.00202551	0.439036	0.0703103	0.00350966	0.00385029	0.012293	0.179255	0.00466873	0.0283141	0.00224818	0.00328379	0.125711	0.00906358	0.00335009	0.00276073	0.00337249	0.00319555	0.0721264	0.00544327	0.00255086	0.00281331	0.0147986	0.00874672	0.00343879	0.0191216	0.00204928	0.00110237
GCF_002959895_1	0.0080966	0.0166592	0.00921021	0.0274753	0.0856891	0.00687266	0.00330374	0.00115814	0.00287532	0.00313405	0.000829152	0.00073466	0.000190962	0.115079	0.00463801	0.00320826	0.00401466	0.0775479	0.00671781	0.00359909	0.000748512	0.00214808	0.00417346	0.383395	0.0469074	0.00243699	0.00638536	0.0117442	0.0240909	0.00281644	0.0368265	0.00227918	0.00179138	0.250199	0.0054538	0.00467363	0.00181315	0.00144359	0.00485717	0.0127816	0.00126154	0.00224851	0.00142183	0.017856	0.00110174	0.00253149	0.0104342	0.0010305	0.00176022
GCF_003011855_2	0.367548	0.108692	0.860632	0.33756	0.135777	0.837601	0.794425	0.871585	0.84769	0.854544	0.82835	0.830368	0.49558	0.681709	0.727701	0.115481	0.813642	0.768603	0.093767	0.855597	0.073364	0.839877	0.819799	0.128318	0.344996	0.377824	0.814457	0.397532	0.0511434	0.869574	0.0586798	0.764469	0.846239	0.797847	0.0514926	0.805289	0.0919059	0.810534	0.764624	0.770049	0.386341	0.0867949	0.0896135	0.492594	0.757376	0.0738018	0.576399	0.695188	0.787353
GCF_003024675_1	0.865101	0.306251	0.901069	0.187254	0.908531	0.0541844	0.242308	0.90829	0.631871	0.234935	0.787537	0.189384	0.0528805	0.541754	0.897319	0.0576011	0.216777	0.0737145	0.918725	0.131464	0.0214312	0.177995	0.0884183	0.168344	0.126152	0.0383837	0.839618	0.910102	0.0262108	0.377449	0.0308176	0.0601981	0.0557027	0.0177118	0.039925	0.0126072	0.875225	0.882348	0.890722	0.850314	0.143077	0.0270902	0.0424332	0.0665828	0.273987	0.0605727	0.203335	0.0865488	0.0318817
GCF_003024715_1	0.130626	0.563856	0.624214	0.0742654	0.793206	0.479861	0.172918	0.140716	0.675881	0.149306	0.210092	0.339673	0.837978	0.343313	0.733955	0.343376	0.509675	0.16275	0.110097	0.800363	0.183112	0.289625	0.107245	0.809793	0.113355	0.324985	0.229443	0.24488	0.0850799	0.216706	0.0852649	0.126887	0.256693	0.0648665	0.0447221	0.0885262	0.189247	0.575001	0.190738	0.0879235	0.12401	0.112573	0.666526	0.548346	0.848469	0.632146	0.727994	0.707045	0.256389
GCF_003096535_1	0.536956	0.868807	0.599229	0.828711	0.664514	0.598269	0.176659	0.779778	0.81697	0.0675988	0.865882	0.915479	0.613822	0.813273	0.880591	0.844997	0.909178	0.257006	0.868186	0.801403	0.88658	0.862183	0.586548	0.808022	0.898726	0.903215	0.859211	0.903432	0.0423363	0.774271	0.362857	0.807124	0.910309	0.683492	0.793514	0.834781	0.88946	0.602216	0.470419	0.0318696	0.815239	0.856964	0.2683	0.708388	0.851473	0.770057	0.567676	0.743775	0.339253
GCF_003112755_1	0.0622969	0.211332	0.206042	0.154081	0.0221426	0.368614	0.542736	0.019968	0.0828221	0.0371329	0.369546	0.135952	0.573166	0.370958	0.434431	0.0333304	0.287842	0.265537	0.121763	0.321843	0.0195764	0.037196	0.236777	0.0840119	0.072204	0.206918	0.0334107	0.148775	0.055699	0.161207	0.0425837	0.0540443	0.0497684	0.00427285	0.00327849	0.00452646	0.303842	0.337504	0.54865	0.0111456	0.0374545	0.414745	0.46756	0.509531	0.60822	0.753605	0.795879	0.5568	0.251509
GCF_003252725_1	0.00105081	0.0399197	0.00129411	0.000826528	4.75592e-05	0.007636	0.00464728	9.61196e-05	0.000806503	0.00164405	0.000856065	0.000387983	0.000725402	0.385801	0.00185781	0.000692361	0.000949681	0.0101411	0.0684647	0.0087604	0.000148685	0.00278096	0.000694364	0.0917722	0.0110933	0.00212314	0.00275593	0.00151739	0.014459	0.0100535	0.000846553	0.000672837	0.211442	0.43181	0.00166157	0	0.000144179	0.000919644	0.000513639	0.0647375	0.000378471	0.00189085	0.000305881	0.00700371	4.80598e-05	0.0210011	0.00462976	0.00210061	0.000143679
GCF_003252755_1	0.00112072	0.0180403	0.000788403	0.000358321	0.000204205	0.00511716	0.00287717	0.000138223	0.000464758	0.00136104	0.000683893	0.00014015	0.00211766	0.343856	0.00194331	0.00117129	0.00140728	0.00896333	0.055456	0.0082096	4.71982e-05	0.00160522	0.000525923	0.31296	0.0107217	0.00272112	0.00219857	0.0036386	0.0139673	0.00474535	0.0007099	0.000138223	0.153315	0.469769	0.000934814	0	9.247e-05	0.00142221	0.000710382	0.0616592	0.00027741	0.00225347	0.000102102	0.00407205	0.00032509	0.0159357	0.00325379	0.00195343	4.57534e-05
GCF_003252795_1	0.00297123	0.0309849	0.000857734	0.000933122	0.000124416	0.0107715	0.00424597	0.000758623	0.00147085	0.00111395	0.000806069	0.00030366	0.00035058	0.519469	0.00117721	0.00103381	0.0013865	0.0194174	0.0734077	0.00803223	0	0.00284207	0.000759677	0.0894669	0.0166565	0.00195956	0.00354217	0.00212404	0.0177725	0.00656506	0.0014271	0.000300497	0.277787	0.604231	0.00240134	0.000101747	0.000342145	0.00139283	0.000592031	0.0873955	0.000150248	0.000806069	0.000287317	0.00688507	0.000153412	0.0198602	0.00197168	0.00276457	0.00010122
GCF_003253005_1	0.000727425	0.0158606	0.000301147	0.000654215	4.62105e-05	0.00451357	0.00137749	0.000428875	0.000196784	0.000952247	0.00054466	0.000201457	0.000394606	0.240932	0.00144862	0.000580486	0.000696791	0.00517194	0.0616453	0.0136632	0.000101767	0.00154623	0.000349434	0.128135	0.00525657	0.00167344	0.0010779	0.0019533	0.00726439	0.00361792	0.000587755	0.000200418	0.159185	0.47123	0.000993265	5.03642e-05	9.70939e-05	0.000603851	0.000766367	0.0391179	0.000391491	0.00355769	9.969e-05	0.00294034	0.000249225	0.0135682	0.0021937	0.00189982	4.93258e-05
GCF_003269275_1	0.00464281	0.00651625	0.00356734	0.000393159	0.00824511	0.00210951	0.00423627	0.000960671	0.000394022	0.00343787	0.00259718	0.00189156	0.00133484	0.00370544	0.889824	0.00157522	0.00433122	0.00263343	0.0147096	0.017201	0.0033891	0.0285465	0.00315433	0.00256697	0.177252	0.000782002	0.00217467	0.00178497	0.000668068	0.125688	0.000885146	0.0208586	0.163243	0.000936071	0.0012468	0.000210605	0.000667204	0.00322597	0.0032756	0.134481	0.000556291	0.000860979	0.899708	0.00462598	0.001996	0.00342751	0.000857958	0.0487784	0.00689042
GCF_003287405_1	0.556585	0.202988	0.827854	0.0760009	0.108051	0.210607	0.18482	0.36529	0.382994	0.105835	0.508825	0.544594	0.46338	0.792195	0.646969	0.83091	0.537828	0.168334	0.151653	0.501742	0.0368105	0.832832	0.0380504	0.140169	0.180565	0.315543	0.510258	0.264592	0.0432629	0.389352	0.0168262	0.377521	0.63684	0.139236	0.0101388	0.0861245	0.199323	0.609964	0.509032	0.053508	0.430539	0.133959	0.235269	0.442298	0.780399	0.382423	0.232022	0.594877	0.291014
GCF_003287495_1	0.152565	0.158733	0.889374	0.049663	0.0414655	0.805635	0.238911	0.404392	0.737661	0.0651218	0.897735	0.888554	0.860943	0.840437	0.833952	0.89242	0.683205	0.160377	0.117673	0.441216	0.0245194	0.846852	0.0221463	0.0865125	0.862091	0.694232	0.353447	0.185401	0.0244186	0.353171	0.0100497	0.815626	0.616491	0.0563579	0.0095773	0.0575646	0.14821	0.734367	0.251214	0.0398248	0.439944	0.0843051	0.145585	0.617081	0.856416	0.62166	0.205843	0.543741	0.211946
GCF_003315195_1	0.0646771	0.000600074	0.0267627	0.000316564	0.00080078	0.00236009	0.00324128	0.0176911	0.000663454	0.000469904	0.000225581	0.000768748	0.00140903	0.481465	0.00073774	0.00033735	0.000372448	0.082499	0.000232396	0.000951735	0.000705708	0.000443325	0.000727858	0.150426	0.0708632	0.00062563	0.042075	0.0191758	0.000141755	0.000639261	0.000406183	0.000860753	0.000520677	0.000234441	3.27127e-05	0.000243641	0.000570087	0.000912207	0.0518353	0.000237167	0.00034178	0.0912514	0.104275	0.679711	0.00194913	0.764707	0.000906074	0.0157007	0.00911083
GCF_003324125_1	0.873868	0.855564	0.847608	0.105301	0.693392	0.851352	0.791995	0.841506	0.832092	0.815643	0.850877	0.898964	0.92562	0.917891	0.854311	0.908687	0.851555	0.869469	0.893274	0.864222	0.0455207	0.84652	0.818261	0.820818	0.150838	0.887651	0.862289	0.871568	0.0726074	0.893793	0.0332918	0.905823	0.893246	0.740667	0.0381268	0.807865	0.217679	0.89997	0.876758	0.451473	0.913864	0.827303	0.545645	0.936547	0.866714	0.874214	0.869359	0.868243	0.910786
GCF_003324185_1	0.30963	0.254766	0.879313	0.087984	0.325727	0.332585	0.212746	0.777495	0.739384	0.10589	0.834213	0.843197	0.837977	0.771755	0.909537	0.470924	0.878761	0.265023	0.175288	0.789163	0.040488	0.863287	0.0395399	0.252549	0.231056	0.362629	0.867311	0.547411	0.0317733	0.775236	0.0167028	0.731718	0.865548	0.397991	0.0131332	0.0931483	0.234016	0.523236	0.281488	0.0586061	0.807549	0.146052	0.608613	0.825589	0.889225	0.744713	0.288286	0.750124	0.670466
GCF_003425665_1	0.122968	0.966934	0.0848236	0.955856	0.047695	0.130107	0.140989	0.922421	0.927252	0.0953739	0.0885988	0.978889	0.929589	0.0928991	0.862721	0.0947873	0.105153	0.277567	0.913467	0.590644	0.699732	0.13304	0.101312	0.903917	0.952404	0.91667	0.125907	0.218044	0.930406	0.198116	0.0285248	0.147738	0.127455	0.251038	0.130646	0.0149341	0.195954	0.973253	0.993321	0.0103639	0.140426	0.936734	0.135517	0.0856717	0.973385	0.149501	0.154203	0.919678	0.128522
GCF_003435375_1	0.155208	0.23923	0.169991	0.0724254	0.0826655	0.130322	0.14806	0.110162	0.119043	0.137571	0.136103	0.146614	0.321191	0.226894	0.187839	0.129406	0.118448	0.0840851	0.101494	0.220692	0.0896917	0.118268	0.157799	0.587637	0.108362	0.18922	0.117454	0.100799	0.0980654	0.125017	0.046615	0.0864676	0.13135	0.0494288	0.0260719	0.0559336	0.10732	0.234124	0.140094	0.0983648	0.0829339	0.084443	0.31277	0.541125	0.354213	0.260341	0.303547	0.270148	0.0860955
GCF_003435815_1	0.770131	0.201956	0.422942	0.0705403	0.410795	0.643025	0.0543014	0.61697	0.566669	0.883953	0.300171	0.104871	0.601157	0.330817	0.349111	0.139495	0.851067	0.687931	0.108975	0.63311	0.0910816	0.819502	0.280228	0.468029	0.726403	0.328531	0.872542	0.880471	0.827404	0.839662	0.806992	0.893373	0.815971	0.0804432	0.035809	0.904893	0.296418	0.748593	0.536494	0.0941655	0.86129	0.0820012	0.855765	0.432666	0.0902344	0.770525	0.0722532	0.471767	0.776139
GCF_003437535_1	0.0190002	0.0358777	0.00959526	0.00217463	0.0054928	0.0262973	0.0949152	0.0109758	0.0838575	0.0161451	0.0198379	0.0176943	0.0121536	0.0269296	0.0298764	0.0301411	0.0433681	0.0514498	0.0265237	0.152067	0.00699155	0.00349993	0.0252359	0.086075	0.0174871	0.02369	0.137638	0.0441454	0.0359853	0.0198609	0.00191951	0.0500687	0.623875	0.000428322	0	0.000720508	0.0212235	0.0273609	0.108688	0.013849	0.00850416	0.0486955	0.0319955	0.0414514	0.0212227	0.0718839	0.0369781	0.662511	0.0263769
GCF_003458705_1	0.187573	0.1672	0.248329	0.0654355	0.0320329	0.107936	0.733854	0.0608972	0.054831	0.140285	0.195687	0.192694	0.337862	0.11821	0.301741	0.108754	0.260135	0.0405761	0.0565008	0.0935507	0.0229952	0.0341302	0.036106	0.258292	0.232485	0.342383	0.235452	0.0601113	0.0367074	0.0657419	0.0339343	0.0412894	0.46388	0.0295036	0.016194	0.0248269	0.0635759	0.813019	0.25707	0.0358121	0.0435051	0.211895	0.20979	0.39765	0.173075	0.0338049	0.343115	0.259287	0.0350309
GCF_003460605_1	0.81696	0.686767	0.740045	0.138488	0.110995	0.203399	0.0978936	0.901137	0.229641	0.479803	0.249099	0.62677	0.161277	0.824229	0.752321	0.262296	0.207001	0.158588	0.847076	0.759112	0.145355	0.243221	0.153495	0.433175	0.392578	0.122963	0.197426	0.252703	0.0765596	0.188439	0.127324	0.286147	0.21565	0.205412	0.0900241	0.550628	0.295997	0.677432	0.365114	0.101575	0.226879	0.142417	0.157796	0.450239	0.410032	0.12876	0.13908	0.851246	0.458247
GCF_003460745_1	0.811725	0.778218	0.76408	0.01749	0.698345	0.69293	0.0461598	0.747421	0.729042	0.669898	0.722261	0.793345	0.762821	0.782457	0.812422	0.719183	0.721319	0.632513	0.755319	0.869972	0.727689	0.69976	0.716848	0.15511	0.772196	0.350271	0.751186	0.657394	0.0113163	0.799824	0.0111386	0.599644	0.84925	0.163189	0.502453	0.766364	0.733157	0.569087	0.108009	0.66398	0.767053	0.749242	0.380803	0.63806	0.796405	0.674229	0.729095	0.664771	0.581132
GCF_003461245_1	0.309709	0.149429	0.826192	0.120667	0.347413	0.194768	0.738356	0.906796	0.227089	0.160045	0.734459	0.551032	0.212182	0.718701	0.753537	0.652356	0.865404	0.173269	0.169584	0.268402	0.119512	0.241501	0.130166	0.126264	0.229569	0.376336	0.235948	0.18098	0.0677033	0.215548	0.62248	0.217623	0.156717	0.112241	0.0630918	0.825362	0.154131	0.638421	0.881457	0.137428	0.196883	0.1212	0.142074	0.323021	0.404311	0.142664	0.116771	0.158767	0.128314
GCF_003461955_1	0.911324	0.816523	0.446006	0.826279	0.711243	0.851633	0.418009	0.446805	0.245472	0.445027	0.238399	0.863606	0.664532	0.814202	0.315431	0.863261	0.591832	0.294278	0.850453	0.243159	0.0936084	0.793544	0.140649	0.452494	0.245627	0.143923	0.301801	0.522475	0.0334771	0.861379	0.0699895	0.844765	0.878146	0.155536	0.0530919	0.854983	0.161648	0.837916	0.838798	0.885879	0.866004	0.197608	0.733135	0.286563	0.214306	0.731219	0.806257	0.781403	0.17885
GCF_003463065_1	0.230309	0.334683	0.3248	0.0546199	0.0556873	0.742403	0.13997	0.439375	0.177186	0.183609	0.75222	0.193859	0.500311	0.476741	0.366761	0.17794	0.569269	0.0633257	0.119478	0.134656	0.774996	0.360993	0.13513	0.122598	0.592783	0.380354	0.679558	0.143232	0.0360286	0.760934	0.0518572	0.689273	0.531489	0.0486788	0.0327149	0.146241	0.0764012	0.231079	0.133424	0.0590998	0.56117	0.120961	0.165277	0.300288	0.118809	0.0537684	0.104252	0.292087	0.176217
GCF_003463205_1	0.0453336	0.416397	0.0309461	0.00879881	0.123542	0.0575884	0.0608722	0.0692995	0.0132748	0.100056	0.100011	0.120276	0.0151894	0.511673	0.0946245	0.115047	0.399743	0.11972	0.136779	0.103085	0.0349256	0.0172401	0.478208	0.378546	0.0886685	0.058502	0.0118903	0.0956844	0.547096	0.116844	0.0123801	0.00440757	0.0602261	0.000937755	0.00342348	0.0019542	0.107752	0.150325	0.424112	0.146679	0.22849	0.179722	0.15521	0.235193	0.264318	0.396434	0.341629	0.17159	0.0733733
GCF_003463825_1	0.00941421	0.0193996	0.0102557	0.0350298	0.0883094	0.00572428	0.00307127	0.0012468	0.0026655	0.00321319	0.0012368	0.000541196	0.00147817	0.104348	0.0062195	0.00277494	0.00536349	0.080119	0.00884053	0.00288938	0.000146917	0.00278943	0.00371591	0.410111	0.055186	0.00328016	0.0064134	0.0119463	0.0253253	0.00398026	0.0420399	0.00307127	0.00274596	0.249586	0.00692911	0.00530702	0.00252208	0.00261003	0.00547043	0.0142085	0.000542195	0.0035555	0.00138872	0.0189034	0.00168555	0.00341758	0.0104396	0.000816541	0.00239166
GCF_003464165_1	0.546661	0.514351	0.237552	0.0781232	0.0398226	0.108825	0.285969	0.134817	0.0621631	0.460157	0.13955	0.196188	0.323447	0.108405	0.307238	0.1054	0.261477	0.0488425	0.0617578	0.0999846	0.0323078	0.0446388	0.0396752	0.26866	0.230055	0.353506	0.66469	0.0752807	0.0464921	0.0687931	0.043741	0.0504762	0.743166	0.0236837	0.029539	0.0347146	0.067078	0.741306	0.32359	0.0417373	0.0480087	0.227666	0.211669	0.37917	0.172708	0.0347388	0.339878	0.26731	0.0426009
GCF_003471165_1	0.387557	0.294385	0.271061	0.198138	0.180972	0.315011	0.129154	0.356468	0.313756	0.274446	0.269793	0.226333	0.196368	0.302297	0.263846	0.92288	0.233803	0.238785	0.29528	0.676175	0.237248	0.286291	0.230651	0.276224	0.234186	0.18832	0.284995	0.277988	0.188825	0.299243	0.192929	0.251713	0.214127	0.776503	0.172964	0.218238	0.218327	0.289435	0.193712	0.342963	0.331332	0.213615	0.209469	0.133988	0.265095	0.445369	0.17616	0.175708	0.158157
GCF_003472155_1	0.235111	0.208127	0.550208	0.194099	0.0490407	0.239054	0.539814	0.0805693	0.115887	0.169712	0.18477	0.465079	0.653476	0.225116	0.621468	0.229367	0.554588	0.075932	0.110241	0.221385	0.0338662	0.041718	0.0592746	0.590727	0.510711	0.653781	0.295668	0.127387	0.0843645	0.141695	0.0597187	0.0711967	0.734709	0.042602	0.01854	0.0283683	0.133891	0.435891	0.513178	0.0615604	0.0838979	0.507645	0.501679	0.688706	0.425954	0.048648	0.67199	0.586147	0.052401
GCF_003473545_1	0.241712	0.630384	0.633464	0.0516482	0.794279	0.408901	0.161339	0.10073	0.547744	0.0835469	0.465798	0.203935	0.0916169	0.739742	0.266077	0.599613	0.293393	0.301945	0.091858	0.901804	0.324732	0.788932	0.804341	0.913979	0.401749	0.313875	0.107665	0.514736	0.0614382	0.382144	0.177867	0.0660286	0.266651	0.0276124	0.0143896	0.0556435	0.414914	0.313661	0.286365	0.0265377	0.232848	0.191432	0.155671	0.539414	0.829988	0.646228	0.103626	0.397911	0.107332
GCF_003474435_1	0.388063	0.376102	0.836103	0.153896	0.142956	0.478943	0.30284	0.263432	0.806085	0.238962	0.827059	0.813654	0.217648	0.216897	0.879566	0.688625	0.763822	0.15595	0.187783	0.9103	0.106206	0.255164	0.144313	0.519314	0.701772	0.266381	0.222751	0.240764	0.0592302	0.47166	0.10396	0.363295	0.214291	0.198375	0.0686014	0.215642	0.170908	0.858493	0.298463	0.238452	0.275457	0.182636	0.17611	0.277941	0.804024	0.162304	0.152314	0.776006	0.157243
GCF_003477525_1	0.593067	0.220784	0.776719	0.167611	0.461059	0.320901	0.14183	0.784471	0.590716	0.233256	0.367721	0.199119	0.232652	0.293174	0.66138	0.722269	0.196153	0.182854	0.774289	0.583108	0.193184	0.237142	0.197074	0.471361	0.213286	0.153247	0.228494	0.523882	0.145121	0.241249	0.179036	0.223364	0.187711	0.146135	0.136145	0.195747	0.191161	0.669811	0.622953	0.304378	0.254191	0.172684	0.152724	0.138253	0.709499	0.156656	0.226252	0.176251	0.145807
GCF_003477605_1	0.816453	0.734237	0.0738741	0.025419	0.0416446	0.774286	0.214673	0.0361063	0.0278036	0.022898	0.457353	0.785572	0.641162	0.803638	0.788445	0.0277034	0.03737	0.0976435	0.598078	0.0408956	0.0142011	0.213573	0.672964	0.0322225	0.050605	0.838613	0.0462619	0.0324489	0.0181864	0.743713	0.0145866	0.0856677	0.813505	0.0163358	0.0146163	0.0224609	0.401672	0.475269	0.600238	0.0214424	0.116147	0.0331834	0.209683	0.796787	0.0677348	0.660169	0.581741	0.650593	0.126392
GCF_003477705_1	0.708937	0.797668	0.651837	0.0495039	0.425536	0.649032	0.210639	0.853322	0.833685	0.846529	0.705799	0.828398	0.660046	0.581183	0.608485	0.772532	0.70739	0.135375	0.879444	0.329329	0.702436	0.775305	0.710855	0.50339	0.708832	0.411939	0.804972	0.710869	0.0511218	0.663283	0.0619579	0.805084	0.568075	0.375713	0.0194359	0.800196	0.72877	0.65673	0.775659	0.0728133	0.817848	0.0949662	0.773608	0.261005	0.706636	0.297208	0.499824	0.380685	0.825311
GCF_003478035_1	0.26028	0.164559	0.105895	0.0569756	0.0657496	0.306035	0.104159	0.0898968	0.0956451	0.0789471	0.136575	0.0893166	0.155042	0.199362	0.238759	0.102396	0.103185	0.0602031	0.089428	0.160706	0.0472933	0.0884489	0.0756313	0.626945	0.237991	0.123782	0.0751962	0.0806306	0.0601647	0.0915408	0.0345378	0.069984	0.0942304	0.0447803	0.0236581	0.0435909	0.0863785	0.219272	0.11441	0.034998	0.0689164	0.0826997	0.116459	0.268252	0.268168	0.174686	0.130835	0.244992	0.0831573
GCF_003478335_1	0.890897	0.0862445	0.152879	0.101576	0.0455792	0.0870953	0.0334306	0.286204	0.053442	0.558077	0.125606	0.522562	0.315591	0.736155	0.150059	0.0521842	0.846667	0.109415	0.413309	0.0792913	0.0357784	0.157669	0.127975	0.0488037	0.831492	0.0590888	0.528838	0.0452907	0.135879	0.0964437	0.0275677	0.0948289	0.107869	0.0300744	0.0192645	0.0462205	0.451143	0.816346	0.213652	0.0671367	0.0596799	0.552244	0.716364	0.880483	0.0902566	0.673135	0.425303	0.12134	0.0650184
GCF_003478505_1	0.134034	0.175285	0.141905	0.0562417	0.0552482	0.160896	0.0793487	0.0844067	0.143733	0.112255	0.0845943	0.0746408	0.0908286	0.395869	0.131023	0.112958	0.0721534	0.0572531	0.0759051	0.370299	0.0423362	0.0779757	0.398361	0.110941	0.280946	0.0801766	0.0548256	0.0693195	0.0518329	0.175017	0.0345474	0.0572973	0.0946593	0.0256535	0.0230098	0.0352191	0.0827444	0.14933	0.083977	0.0301874	0.0542811	0.0609555	0.0733493	0.236809	0.181589	0.150456	0.0713098	0.201528	0.0646293
GCF_003478765_1	0.791859	0.371675	0.805232	0.178851	0.181589	0.666677	0.233868	0.877326	0.77912	0.25619	0.878179	0.209498	0.563077	0.623968	0.821185	0.892117	0.426391	0.210861	0.271129	0.658647	0.212021	0.899486	0.19993	0.254136	0.620055	0.175686	0.884635	0.540116	0.148623	0.509336	0.16435	0.750955	0.754044	0.213671	0.145521	0.488868	0.194925	0.886838	0.71987	0.873376	0.862914	0.201243	0.291426	0.294908	0.265873	0.366534	0.191821	0.335079	0.184262
GCF_003478935_1	0.124367	0.572542	0.134263	0.049824	0.502878	0.775726	0.312095	0.162368	0.113836	0.134646	0.815496	0.750978	0.771793	0.788666	0.753053	0.82411	0.730351	0.124594	0.0732456	0.704783	0.0408252	0.1396	0.403685	0.127922	0.220641	0.629909	0.29609	0.379166	0.052757	0.122667	0.0376291	0.0777666	0.817907	0.221526	0.0255728	0.0404639	0.220338	0.531981	0.290543	0.0351452	0.125077	0.0576396	0.267561	0.506965	0.758559	0.530771	0.623315	0.360776	0.443126
GCF_003479605_1	0.284563	0.813439	0.0763597	0.676842	0.054926	0.0850407	0.0380888	0.688174	0.405255	0.0672926	0.125346	0.130174	0.801614	0.618027	0.82629	0.132615	0.0616863	0.0563307	0.0532625	0.772394	0.0274548	0.0522866	0.0991544	0.0513431	0.134434	0.168787	0.0749513	0.0954583	0.00860054	0.187125	0.0301871	0.0555366	0.419756	0.0439978	0.0155534	0.0468014	0.791194	0.779793	0.19615	0.0248497	0.0531322	0.0420696	0.0638938	0.0718736	0.804512	0.131022	0.377308	0.763751	0.0383302
GCF_003480145_1	0.829479	0.805322	0.779527	0.729375	0.480136	0.755739	0.189558	0.826628	0.809152	0.814948	0.82601	0.678595	0.804093	0.669337	0.825755	0.743748	0.782208	0.769126	0.816069	0.846165	0.772685	0.820218	0.764139	0.778352	0.766103	0.717933	0.827254	0.717705	0.0636855	0.799909	0.72082	0.842019	0.821849	0.688467	0.0681852	0.791011	0.803298	0.791289	0.809253	0.687798	0.825972	0.784949	0.78423	0.684057	0.727344	0.735104	0.751133	0.818466	0.19337
GCF_003480185_1	0.65384	0.741929	0.666275	0.561187	0.563561	0.487388	0.487874	0.810087	0.653082	0.647835	0.737951	0.59272	0.554892	0.556837	0.550618	0.664113	0.723543	0.64184	0.65933	0.794852	0.610059	0.652786	0.593822	0.640942	0.727314	0.578104	0.657545	0.701066	0.54649	0.714857	0.558952	0.719248	0.682204	0.3883	0.55497	0.609465	0.6859	0.650942	0.544966	0.610254	0.687673	0.703688	0.510344	0.488073	0.6479	0.587806	0.537853	0.524882	0.545267
GCF_003480315_1	0.120116	0.111974	0.237738	0.100602	0.111635	0.209041	0.0736576	0.069345	0.0832498	0.0593411	0.0724285	0.0986286	0.118229	0.430239	0.0967928	0.224379	0.0932895	0.0544071	0.0598343	0.272839	0.0432199	0.0604504	0.0931946	0.204104	0.0867643	0.105664	0.0536544	0.0717057	0.0435684	0.205717	0.0367146	0.0514745	0.142413	0.029909	0.0313867	0.0341591	0.0850561	0.147803	0.0973719	0.0483138	0.0513787	0.0548368	0.0684286	0.260247	0.469708	0.145845	0.0540452	0.205496	0.0596043
GCF_003480435_1	0.104731	0.13292	0.0880368	0.0380439	0.0459245	0.0980697	0.101887	0.07027	0.0623093	0.071213	0.0792903	0.0768057	0.181148	0.126935	0.112791	0.0711056	0.065598	0.0832559	0.116048	0.226577	0.0510583	0.068944	0.081666	0.282832	0.0963273	0.14995	0.0592759	0.0595936	0.0540858	0.0628898	0.0261958	0.0545562	0.0862009	0.0314207	0.0207236	0.0370813	0.0694937	0.117643	0.0898726	0.0457691	0.0494227	0.058545	0.137901	0.289792	0.426082	0.5193	0.136111	0.223934	0.0501014
GCF_003480725_1	0.167125	0.278903	0.212537	0.0796241	0.0930983	0.216865	0.0940836	0.137894	0.117174	0.133935	0.145622	0.212646	0.545159	0.398856	0.218358	0.0988949	0.128944	0.107017	0.078481	0.457821	0.0721237	0.132434	0.0976658	0.282169	0.113092	0.340223	0.107923	0.119647	0.109085	0.122131	0.0492123	0.0990624	0.132805	0.0478917	0.0350564	0.0554495	0.128193	0.239404	0.186251	0.0760955	0.0907815	0.0981299	0.419849	0.358039	0.745231	0.263364	0.53694	0.474377	0.0992263
GCF_003481005_1	0.766268	0.846097	0.813103	0.066259	0.232276	0.298244	0.398113	0.505754	0.829463	0.785177	0.223025	0.817635	0.786906	0.859765	0.714473	0.105866	0.621707	0.385868	0.798609	0.752723	0.0587036	0.758119	0.845805	0.183604	0.818528	0.796333	0.521258	0.63647	0.0458352	0.671574	0.0411119	0.178496	0.828473	0.0564947	0.0349949	0.485098	0.833231	0.600253	0.584737	0.0456579	0.265946	0.0911591	0.471036	0.837879	0.854899	0.733815	0.765906	0.667725	0.466759
GCF_003481335_1	0.0843406	0.0733733	0.0726434	0.0546821	0.0407006	0.732134	0.0525559	0.163261	0.0601847	0.0702351	0.0835923	0.0702675	0.763785	0.785729	0.16607	0.75286	0.067818	0.0837484	0.0434379	0.0949016	0.0488733	0.19002	0.0558009	0.067746	0.0583166	0.0960564	0.0543208	0.0665452	0.0430354	0.0955855	0.0470621	0.134591	0.0723707	0.0664904	0.0236088	0.0338511	0.074063	0.710842	0.0807709	0.0427149	0.0558502	0.744723	0.56023	0.0785745	0.0836797	0.0557128	0.0754299	0.739469	0.0892295
GCF_003481535_1	0.236824	0.209365	0.198524	0.105474	0.0643223	0.324761	0.121379	0.144995	0.130962	0.128656	0.131978	0.189994	0.350943	0.23719	0.171492	0.133894	0.138943	0.108314	0.109557	0.275455	0.0977749	0.169368	0.119086	0.257555	0.13083	0.264303	0.11967	0.13315	0.0855658	0.128863	0.0708174	0.135392	0.125812	0.052517	0.0634488	0.0587852	0.151259	0.32888	0.163793	0.0496698	0.116702	0.111768	0.334911	0.278638	0.500741	0.241028	0.462894	0.243567	0.116429
GCF_003481565_1	0.766709	0.677055	0.333918	0.0404591	0.058104	0.749608	0.181634	0.0936444	0.105746	0.0801899	0.3426	0.438591	0.680982	0.387435	0.406759	0.118376	0.192372	0.201681	0.643773	0.308219	0.0508525	0.0640622	0.228846	0.124954	0.237438	0.716699	0.11669	0.249266	0.0483961	0.274979	0.0246491	0.101115	0.717836	0.0330088	0.0183691	0.031359	0.727916	0.749622	0.381284	0.0364218	0.0641456	0.210355	0.627933	0.640204	0.498035	0.210902	0.719851	0.415902	0.276435
GCF_003481705_1	0.286526	0.130406	0.706906	0.106214	0.0570183	0.750158	0.109683	0.241956	0.157121	0.214619	0.823041	0.149158	0.124864	0.807171	0.159409	0.114474	0.140732	0.0708446	0.603722	0.649271	0.115616	0.225927	0.435565	0.121846	0.184539	0.172823	0.242749	0.129756	0.0464657	0.395671	0.0360956	0.26357	0.152738	0.068534	0.0702549	0.101614	0.140517	0.364001	0.126671	0.0224853	0.11983	0.126196	0.312783	0.62397	0.815813	0.106867	0.118805	0.470285	0.241045
GCF_003490145_1	0.115937	0.0909521	0.0959019	0.0501038	0.040764	0.540211	0.110207	0.0847582	0.0817561	0.070485	0.108361	0.119959	0.0930476	0.305799	0.102825	0.0878131	0.100181	0.0503086	0.062529	0.11648	0.032274	0.062605	0.0834176	0.0705453	0.0746731	0.108372	0.09047	0.0589581	0.0375384	0.20536	0.0287428	0.0743356	0.114113	0.0294048	0.0175614	0.0394413	0.0891068	0.186866	0.616441	0.029919	0.062475	0.0733209	0.0792856	0.120181	0.16944	0.0678484	0.213874	0.105277	0.0475929
GCF_003573975_1	0.11006	0.225287	0.107791	0.146409	0.0509137	0.131825	0.171064	0.0551663	0.063627	0.0713599	0.174443	0.147059	0.273902	0.183752	0.17639	0.0824961	0.101357	0.330274	0.0502578	0.147946	0.0452698	0.0949028	0.117801	0.466314	0.0815962	0.211799	0.069219	0.177513	0.101075	0.107314	0.045261	0.0884433	0.112827	0.0232113	0.0226964	0.02723	0.205504	0.153243	0.246557	0.0228364	0.0665517	0.15971	0.272699	0.189779	0.220449	0.781919	0.55471	0.329751	0.136607
GCF_003584705_1	0.417154	0.808697	0.64888	0.0583565	0.0795629	0.324872	0.173673	0.106536	0.240928	0.0825293	0.727485	0.615645	0.387993	0.702966	0.348065	0.250596	0.646765	0.16906	0.442308	0.782957	0.185124	0.0754763	0.610489	0.267636	0.260342	0.483371	0.18622	0.139955	0.0768324	0.558493	0.0310427	0.131953	0.76897	0.0353189	0.0200658	0.0451988	0.803984	0.621897	0.325523	0.0601108	0.0705036	0.69352	0.274718	0.652994	0.815639	0.367777	0.816857	0.82583	0.134908
GCF_003697165_2	0.0250096	0.0166844	0.0827749	0.00494177	0.564115	0.471855	0.681746	0.00149796	0.00887418	0.00423212	0.0179488	0.166876	0.389425	0.0477037	0.12474	0.00348194	0.0735579	0.698195	0.00299573	0.160992	0.00435863	0.0785402	0.00128366	0.950098	0.0567864	0.00782489	0.341367	0.671466	0.61072	0.0366439	0.710067	0.140608	0.500482	0.854876	0.780762	0.492572	0.856238	0.737577	0.811361	0.375855	0.00653964	0.36141	0.0135806	0.240653	0.00198755	0.529217	0.237267	0.0267524	0.558737
GCF_003851945_2	0.0181525	0.00818921	0.00370489	0.00630548	0.00878523	0.201871	0.0150978	0.00369715	0.0058647	0.00131008	0.0100938	0.0426862	0.0146953	0.0378049	0.0585427	0.0132618	0.0199137	0.0234672	0.015307	0.0167749	0.00241073	0.000997877	0.00392098	0.0162922	0.0415651	0.0333963	0.00278292	0.00827866	0.0112026	0.0259504	0.00136426	0.00473287	0.240969	0.000181471	0.000232429	0.000120622	0.0575219	0.154225	0.210165	0.00432413	0.00429403	0.0127288	0.031811	0.0701337	0.0342647	0.0953762	0.0703188	0.602375	0.0105378
GCF_003865035_1	0.296224	0.802567	0.120871	0.0552253	0.219478	0.819085	0.831289	0.0963078	0.130754	0.0916471	0.0861299	0.111286	0.379593	0.400491	0.842835	0.0743703	0.266259	0.0748689	0.0787227	0.853001	0.0775984	0.0816692	0.132484	0.874241	0.217461	0.708054	0.0772473	0.189038	0.741373	0.0981926	0.0406386	0.0662767	0.0714385	0.0376771	0.0304397	0.0462355	0.339971	0.448161	0.78014	0.0357605	0.0628883	0.0826887	0.80554	0.805168	0.881081	0.0487512	0.144769	0.642642	0.0806702
GCF_003991565_1	0.0719081	0.0168107	0.0265906	0.0161889	0.0303015	0.0584036	0.217996	0.0089279	0.00791452	0.00363735	0.0419956	0.0591487	0.067645	0.192192	0.076166	0.0429505	0.0527369	0.0290158	0.0248421	0.0517038	0.00364499	0.0123613	0.00314342	0.0577355	0.0187607	0.0488994	0.013746	0.0223068	0.0376773	0.0417382	0.00336748	0.00537113	0.0455844	0.000627559	0.00108552	0.000831521	0.0825653	0.0443861	0.0882678	0.00588234	0.01243	0.0519486	0.143179	0.0982232	0.0833565	0.0709462	0.0990949	0.110288	0.0233809
GCF_004123145_1	0.769138	0.10854	0.802478	0.747374	0.0855358	0.355826	0.410976	0.810873	0.36245	0.361817	0.329565	0.312554	0.235466	0.279609	0.236549	0.102392	0.281388	0.259009	0.0977701	0.357351	0.0809527	0.349014	0.33735	0.226754	0.760736	0.137333	0.303548	0.766729	0.0432621	0.748076	0.0650322	0.289333	0.319184	0.283058	0.0308662	0.302638	0.0947346	0.29164	0.271007	0.300402	0.784729	0.0814636	0.0907197	0.164481	0.284204	0.0667674	0.179009	0.223884	0.281461
GCF_004134775_1	0.00116887	0.00136637	0.00197152	0.00843714	0.000608213	0.00321249	0.00487376	0.00154891	0.000463254	0.000734765	0.0090116	0.00407649	0.0548351	0.0109728	0.0257076	0.00108949	0.000739366	0.000643111	0.000563345	0.0127663	0.0112727	0.00127625	0.001231	0.00125286	0.00125171	0.0526914	0.00209193	0.00161104	0.000737449	0.00367344	0.000642344	0.0717331	0.00216786	0.000622402	0.000197113	0.000461337	0.00679926	0.0177126	0.00524191	0.000448298	0.00148717	0.00837194	0.0200315	0.0429189	0.0324581	0.00281212	0.0458795	0.0375762	0.0119848
GCF_004354505_1	0.834656	0.806423	0.1789	0.274858	0.74748	0.00713747	0.146622	0.847554	0.0895921	0.306648	0.708586	0.256608	0.119849	0.816955	0.774888	0.700444	0.734632	0.634523	0.856286	0.810012	0.0257627	0.0395651	0.0255772	0.813007	0.604726	0.579312	0.398905	0.124157	0.3108	0.0327407	0.843723	0.801099	0.544449	0.231708	0.177621	0.0785662	0.504223	0.675158	0.822791	0.333848	0.0328886	0.15684	0.0335076	0.0167673	0.45804	0.700347	0.0446581	0.0167866	0.00909108
GCF_004535825_1	0.00217021	0.000271795	0.00403155	0.00148341	0.0085047	0.125549	0.0413534	0.0021141	0.0729836	0.000580431	0.0130862	0.007773	0.00681928	0.0191574	0.00602634	0.0374919	0.00431457	0.0543219	0.0135483	0.00667118	0.000214704	0.00126041	0.00498673	0.00410377	0.0049089	0.0017979	0.0557873	0.0671878	0.000553594	0.0470315	0.000270087	0.0328345	0.00252496	0.0161882	0.00046576	0.0387269	0.00330521	0.00538589	0.0546872	0.0205349	0.00938157	0.0458873	0.0305838	0.00699519	0.0112627	0.0153054	0.00467005	0.0503507	0.002645
GCF_005121165_1	0.113326	0.365512	0.133493	0.390952	0.0463747	0.24109	0.13396	0.0452796	0.100781	0.179661	0.423179	0.250718	0.841468	0.165806	0.560895	0.119923	0.203575	0.327451	0.388219	0.421801	0.0658478	0.0826381	0.16122	0.537019	0.305918	0.353116	0.0897097	0.265639	0.170003	0.242322	0.0491039	0.0888555	0.0928819	0.031567	0.0135354	0.029036	0.512995	0.292262	0.212431	0.0130712	0.0768606	0.659691	0.407782	0.4138	0.7467	0.880096	0.896176	0.635131	0.636998
GCF_005845215_1	0.0311245	0.0465916	0.0323252	0.0448903	0.128061	0.0260671	0.0210793	0.0277389	0.0289261	0.0353694	0.0359258	0.0378169	0.067944	0.0394064	0.0616376	0.0340329	0.0331688	0.0322909	0.0295942	0.0433431	0.0213704	0.0310956	0.0337629	0.0673685	0.0347047	0.0400868	0.0219158	0.0299274	0.165527	0.0402134	0.0180036	0.0265914	0.028841	0.0106272	0.0127596	0.013	0.0494112	0.0350658	0.0487923	0.013998	0.0292487	0.0476135	0.479839	0.0408724	0.0548747	0.0443691	0.0444009	0.034372	0.0376974
GCF_006337085_1	0.000718569	0.000991002	0.062077	0.000881895	0.00117575	0.00198435	0.0016915	0.000657656	0.00137924	0.00123934	0.0109111	0.00191875	0.00166606	0.00191339	0.000703173	0.000988994	0.00103685	0.0011309	0.00051508	0.00195623	0.00172497	0.00173869	0.000801236	0.000411328	0.000764755	0.0382997	0.00105058	0.000830354	0.00061147	0.000862483	0.00121357	0.00140601	0.00118412	0.000697818	0.000140902	0.00101443	0.00126678	0.0244032	0.000921388	0.00132569	0.0261275	0.00152315	0.00308546	0.0019974	0.00615988	0.010321	0.000796216	0.00486866	0.00136652
GCF_900104615_1	0.0171052	0.060469	0.0120167	0.0156288	0.00731766	0.0739156	0.0207398	0.0113731	0.00918806	0.0088614	0.0265493	0.026862	0.259081	0.0264083	0.0603939	0.0124825	0.224952	0.0256105	0.0160465	0.097358	0.00755945	0.0151832	0.0106547	0.0591923	0.0136143	0.0307384	0.0302239	0.0133969	0.134236	0.021047	0.005536	0.0183591	0.0176717	0.00360013	0.000564954	0.0043503	0.05021	0.0406879	0.0395297	0.00221293	0.00989909	0.159928	0.0603908	0.0320551	0.323114	0.214588	0.0740554	0.040052	0.185257
GCF_900106755_1	0.0826053	0.0227034	0.131131	0.00507939	0.0421793	0.12232	0.0354505	0.00428938	0.0194442	0.00100464	0.0467549	0.0690059	0.0167241	0.0305203	0.119665	0.0210839	0.07321	0.0756873	0.0259891	0.489029	0.00612111	0.00668913	0.00457749	0.147888	0.027911	0.0300562	0.0155223	0.078173	0.0913833	0.0330682	0.00848999	0.00137498	0.59425	0.000441489	0.00100782	0.000325873	0.535048	0.486398	0.169743	0.0176953	0.00979113	0.07719	0.0743358	0.936235	0.810652	0.109164	0.0449124	0.0879915	0.0174033
GCF_900107675_1	0.00763006	0.0114085	0.00106135	0.00416571	0.00261854	0.0152309	0.00611414	0.000717692	0.00130784	0.000159933	0.0060743	0.0061855	0.0260536	0.0107006	0.185415	0.00100259	0.0100311	0.00930505	0.00304388	0.0115619	0.00167786	0.00124421	0.0130302	0.0052689	0.00632939	0.00729013	0.00250475	0.00317143	0.000540275	0.0093747	0.000200346	0.00312127	0.0166958	3.00949e-05	0.000116654	0.000214964	0.0239914	0.0417918	0.00855326	0.00152395	0.000727437	0.0534766	0.0303893	0.0653962	0.0362813	0.0554534	0.0389457	0.0783872	0.0104782
GCF_900113155_1	0.015132	0.0468327	0.0146805	0.475812	0.0234683	0.0129891	0.0150521	0.0101122	0.0114094	0.0142324	0.0129466	0.0155486	0.0212953	0.0122977	0.0196538	0.0113748	0.00974779	0.0171084	0.0210952	0.0293312	0.0222582	0.0167069	0.0271185	0.094945	0.0113871	0.0148331	0.0120247	0.0168125	0.900191	0.0143087	0.00939633	0.0121176	0.0137167	0.0126914	0.0344489	0.00479769	0.0247415	0.0193811	0.0275867	0.0598963	0.00761012	0.292453	0.0394846	0.0142718	0.0246936	0.0796015	0.0354658	0.016069	0.0195316
GCF_900120005_1	0.419934	0.864983	0.0160771	0.0125851	0.0290485	0.030008	0.0178598	0.0242972	0.03602	0.0254643	0.0266478	0.0891744	0.431562	0.0685899	0.0300249	0.027835	0.024148	0.101177	0.287236	0.0425281	0.0138382	0.0290841	0.828433	0.0939761	0.218812	0.0160195	0.0170897	0.0300964	0.0131296	0.0337967	0.240661	0.040454	0.0170769	0.00724016	0.00983106	0.00873963	0.530583	0.0871179	0.368464	0.0108771	0.0173827	0.639953	0.0426842	0.0212807	0.0518171	0.0292317	0.177079	0.0283433	0.0221535
GCF_900120195_1	0.6928	0.117465	0.401645	0.0736164	0.10451	0.17918	0.280362	0.477687	0.855423	0.317609	0.281619	0.728835	0.729568	0.460651	0.287883	0.866857	0.324352	0.279854	0.33593	0.136529	0.855293	0.748172	0.314884	0.0965798	0.27485	0.336323	0.672461	0.859647	0.043178	0.86239	0.0939853	0.355098	0.372167	0.152625	0.048762	0.208687	0.113246	0.309181	0.203536	0.247221	0.406351	0.0858412	0.640532	0.516586	0.168706	0.28437	0.246783	0.417623	0.544007
GCF_900128475_1	0.0169971	0.0091871	0.0135975	0.00349835	0.00761016	0.0323666	0.0225311	0.00494055	0.0144004	0.00208984	0.0226215	0.0333676	0.00925473	0.0281618	0.0329722	0.0224817	0.0363229	0.026076	0.0274671	0.0188572	0.00147664	0.00303358	0.0122379	0.011162	0.0347252	0.01807	0.0153974	0.0208918	0.0256325	0.0295828	0.00187252	0.00373846	0.0222084	0.000603068	0.000599015	0.0100141	0.0843401	0.0403161	0.0381106	0.0160339	0.00980562	0.0259509	0.0189446	0.0303522	0.0298414	0.0556411	0.0386212	0.0815826	0.00831124
GCF_900129655_1	0.0187494	0.00595203	0.00468682	0.0013599	0.00887269	0.00475618	0.00816153	0.00245118	0.00455585	0.508387	0.0205372	0.143635	0.00213748	0.0195366	0.0149517	0.0132586	0.0273065	0.518791	0.0807857	0.0958969	0.00303697	0.00238956	0.00914877	0.00306071	0.406596	0.00519045	0.00583039	0.0553477	0.00187286	0.0225597	0.00180671	0.000934964	0.0169531	0.000449209	0.000282223	0.000297161	0.0121841	0.186426	0.0118155	0.00699716	0.00350885	0.00954463	0.0184549	0.0203945	0.280929	0.872313	0.034563	0.016589	0.0287131
GCF_900130135_1	0.0215751	0.00821583	0.00862435	0.00615313	0.0116276	0.0302409	0.0212274	0.00484181	0.00610433	0.00425419	0.018028	0.0396961	0.0189778	0.0395108	0.0381096	0.0208053	0.0340423	0.0202394	0.0251453	0.0258429	0.000619313	0.00181769	0.00559897	0.0127128	0.0219086	0.0154866	0.0100569	0.0139856	0.0185756	0.0181387	0.00334635	0.00236431	0.0231822	0.000438449	0.000224885	0.00548728	0.0685226	0.0234116	0.0304334	0.0040205	0.0118417	0.021879	0.0379579	0.0283189	0.0363858	0.0368461	0.0425605	0.0556813	0.0145999
GCF_900142265_1	0.0626908	0.0800896	0.0319721	0.116761	0.036582	0.0558884	0.0587622	0.0297057	0.032531	0.0387434	0.0726206	0.0907115	0.141806	0.0680738	0.105876	0.0667153	0.036613	0.10729	0.0629528	0.071378	0.0549222	0.041996	0.0710804	0.0532803	0.0794018	0.092414	0.0400763	0.0567898	0.122137	0.0639585	0.0428353	0.0962955	0.0534585	0.0097546	0.0237018	0.0157747	0.132021	0.0811969	0.119698	0.0391157	0.068305	0.115073	0.110984	0.0974752	0.106763	0.119587	0.143455	0.0743319	0.0859819
GCF_900155425_1	0.0228946	0.0102041	0.162288	0.00114516	0.00768185	0.0738212	0.0193931	0.00583787	0.00271432	0.00224026	0.0150199	0.0357689	0.00871034	0.0297631	0.0260804	0.0145735	0.0263857	0.0226744	0.0297097	0.0132621	0.00195726	0.00273406	0.0104343	0.0118064	0.0370597	0.0204886	0.00689847	0.00967501	0.0167061	0.027553	0.00152987	0.00301845	0.023794	0.000492206	0.000492406	0.000314709	0.0417965	0.0173387	0.0849736	0.00349271	0.00532592	0.0148847	0.372492	0.0255329	0.0217801	0.0526292	0.0405019	0.0354965	0.011089
GCF_900167555_1	0.856228	0.866271	0.904624	0.0469902	0.241645	0.279973	0.619177	0.855531	0.84373	0.854539	0.910274	0.861752	0.903321	0.84889	0.851947	0.844764	0.886342	0.855047	0.129581	0.879667	0.0256021	0.862711	0.620563	0.829589	0.809633	0.819451	0.895657	0.856775	0.0474033	0.90324	0.0250465	0.887865	0.822407	0.145257	0.0243777	0.809721	0.85902	0.872915	0.872908	0.0471698	0.892555	0.899271	0.827377	0.888978	0.90464	0.84559	0.844858	0.868943	0.850715
GCF_900209925_1	0.322435	0.809241	0.340945	0.0889327	0.13541	0.519936	0.616135	0.573826	0.415335	0.803442	0.512792	0.566129	0.479885	0.377198	0.235629	0.652387	0.647741	0.780442	0.734328	0.267872	0.145166	0.756181	0.778265	0.786472	0.793918	0.203702	0.808662	0.817343	0.05565	0.611104	0.790708	0.396957	0.530486	0.655283	0.0702262	0.761629	0.791675	0.723735	0.38753	0.186541	0.480044	0.142818	0.728834	0.568602	0.470275	0.78829	0.390281	0.318888	0.798614
GCF_900240235_1	0.00749469	0.00987555	0.0905228	0.00290736	0.0529844	0.0144208	0.00934611	0.0027277	0.00121227	0.00191152	0.679182	0.0250489	0.016936	0.0274938	0.331449	0.00767172	0.0109834	0.0180389	0.00815814	0.0215368	0.00118042	0.00225442	0.00398103	0.0086843	0.338301	0.00735017	0.00126285	0.0350275	0.00588204	0.00722996	0.000355701	0.00234014	0.252031	0.000138274	0.000429272	0.000237134	0.100307	0.456394	0.0171124	0.00384341	0.00280488	0.0191993	0.0110166	0.01788	0.0383911	0.0315467	0.0171495	0.032243	0.531489
GCF_900537995_1	0.843648	0.856601	0.851993	0.0517917	0.0716479	0.133056	0.15092	0.197137	0.718315	0.736759	0.137193	0.865414	0.799286	0.522646	0.194433	0.463767	0.149763	0.091078	0.310025	0.508217	0.0473945	0.126874	0.77854	0.116157	0.533224	0.628776	0.337614	0.0970588	0.0447326	0.259029	0.0550687	0.148976	0.669112	0.0392883	0.0278447	0.148407	0.260771	0.288181	0.266432	0.0473122	0.477791	0.0823377	0.259732	0.846113	0.716709	0.362386	0.7659	0.569384	0.0983516
GCF_900637515_1	0.010606	0.0167371	0.0118087	0.0634626	0.105176	0.00730166	0.00390899	0.00151163	0.00336858	0.00306248	0.00118569	0.0011616	0.00142377	0.0928427	0.00618589	0.00381404	0.00418864	0.0480596	0.00798568	0.00294674	0.000355706	0.00300484	0.00351597	0.322664	0.0466183	0.00271291	0.00616274	0.0112598	0.027183	0.00461993	0.0366014	0.00290895	0.00323773	0.200582	0.00679007	0.00534079	0.00247105	0.00269071	0.00638712	0.0129316	0.00122631	0.0040526	0.00369831	0.0152779	0.00102224	0.00896399	0.0108025	0.00122253	0.00202228
[truncated: 359 more columns]

## Sheet: d) Genome % abundance x samples
bins	C3002C4_MGX	C3013C2_MGX	M2008C11_MGX	M2075C4_MGX	M2077C1_MGX	P6009C1_MGX	IBDMDB_CD_MSM6J2IY	IBDMDB_CD_PSM7J199	IBDMDB_UC_PSMA267J	G48777_CD	G48780_CD	G48783_Control	G48784_UC	G48787_Control	G48789_Control	G48790_Control	G48791_UC	G48792_Control	G48793_Control	G48794_UC	G48795_CD	G48796_CD	G48798_Control	G48799_UC	G48802_UC	G48804_CD	G48805_CD	G48806_CD	G48807_CD	G48808_Control	G48810_CD	G48812_UC	G48814_UC	G48815_CD	G48817_CD	G48819_CD	G48820_CD	G48821_UC	G48822_UC	G48823_CD	G48826_Control	G48827_CD	G48831_Control	G48832_UC	G48836_UC	G48838_CD	G48839_CD	G48841_CD	G48842_CD
GCA_000210075_1	0.0218494	0.00262954	0.0248383	0.00303511	0.0284999	0.00504387	0.00126356	0.0381847	0.00267184	0.0115378	0.0119908	0.00108238	0.0132349	0.00357478	0.00306801	0.000703025	0.0013649	0.00713869	0.000889553	0.0024655	0.022494	0.0137524	0.00121439	0.0149376	0.00316783	1.2917e-05	1.47869e-05	0.00121026	0.00195894	0.00119572	0.00971063	0.0159394	4.0515e-05	0.0455821	0.00335933	9.78341e-06	0.000338541	1.49295e-05	8.68031e-06	0.00139723	0.00188501	0.00024307	0.000279189	0.000140049	1.4905e-05	0.00480833	0.0091071	7.97681e-05	0.00886798
GCA_000210555_1	2.51885e-05	7.2225e-05	1.47068e-05	0.00033391	3.77579e-06	0.000189422	0.000306626	4.43071e-05	7.22292e-05	0.000288256	0.000261666	0.00248466	0.000421805	0.000942356	0.00182689	0.00195409	0.000442034	0.000886733	0.00118011	0.00141892	0.000255733	0.00120708	0.00308709	0.000703337	0.000630887	0.000535705	4.05978e-06	7.03785e-05	0.00101654	0.000671225	0.00165418	0.000827775	0.000897939	0.00109645	0.000162291	4.57198e-06	7.47971e-05	0.000702533	6.30387e-05	0.000556208	0.00181693	0.000935657	0.00137909	0.000312912	6.65169e-05	0.000273822	0.000158759	0.000372815	0.000818431
GCA_000431575_1	7.85943e-07	2.52176e-06	2.89139e-06	0.00061335	2.19835e-06	0.000344843	2.09403e-06	0.000178586	1.80181e-06	1.25437e-06	9.50564e-06	0.00918416	0.0015239	0.00193807	0.000681632	0.000961021	0.000247162	0.00104545	0.000404217	0.000460133	7.39238e-05	9.81078e-05	0.0098698	0.00328959	1.54813e-05	9.10742e-07	1.23224e-06	8.23065e-06	4.8356e-06	0.000161647	6.22858e-06	0.000313286	2.67893e-05	1.91324e-06	5.87845e-05	1.15099e-06	7.00032e-07	2.04847e-06	1.38787e-06	5.43012e-06	0.00901304	9.72189e-06	3.26821e-05	8.63781e-06	4.20362e-06	4.27569e-06	0.000376576	1.22425e-06	2.97588e-06
GCA_000431795_1	0	1.05702e-07	0	0	0	5.57164e-08	3.73934e-08	0	9.79247e-08	5.7452e-08	7.41e-07	1.99322e-07	6.17718e-07	1.15503e-07	4.68426e-05	0.000675808	1.64565e-06	4.40696e-07	2.21768e-05	0.000155379	9.1788e-08	3.42321e-06	4.49454e-08	4.43268e-07	3.20619e-07	3.66518e-07	3.30064e-08	3.64155e-06	2.16519e-07	2.09177e-07	3.66387e-08	8.19202e-07	7.68449e-07	2.85886e-07	3.54263e-05	2.1954e-06	1.15195e-07	5.55518e-07	6.4524e-07	2.446e-08	1.45669e-07	1.14916e-07	5.14241e-06	5.57278e-07	1.59595e-06	3.65891e-07	3.20098e-07	5.82979e-08	8.81442e-07
GCA_000432135_1	4.60064e-07	6.19114e-07	9.74505e-06	6.58857e-05	1.15791e-06	3.63549e-06	1.06945e-05	1.78568e-06	1.29065e-05	1.17968e-05	9.78352e-06	2.14533e-05	1.42944e-05	1.65169e-05	0.000333778	0.00166566	0.00107066	0.00406893	0.000305558	0.000544354	1.53171e-05	0.000608322	0.00937461	2.87191e-05	0.000847752	8.32995e-07	8.91172e-07	2.05487e-05	1.53909e-05	3.51417e-05	6.2408e-06	1.19174e-05	2.92011e-05	5.83867e-06	0.00485543	6.39438e-07	6.64587e-07	1.26149e-06	9.73947e-07	0.000176993	4.24806e-05	6.63065e-06	4.7871e-05	3.74173e-06	9.97469e-07	1.91622e-05	3.27101e-06	6.57933e-07	1.38281e-06
GCA_000432375_1	1.05431e-06	4.83211e-07	9.65581e-06	3.32684e-05	4.19532e-07	2.78582e-07	6.56254e-06	1.52527e-06	4.13438e-05	5.87925e-06	0.00151236	5.35442e-05	0.00132617	1.90772e-05	0.000968163	0.0011973	8.96682e-05	0.00503636	0.0493331	0.00242862	1.7325e-05	0.0408189	0.00374303	3.76544e-05	0.000489826	6.78614e-06	4.95095e-06	5.38801e-06	1.30814e-05	0.00100926	1.06008e-05	0.0114674	8.25196e-06	6.23451e-06	8.93864e-05	2.44052e-06	2.99507e-06	3.29839e-06	2.2766e-06	1.00408e-05	6.55873e-05	5.49298e-06	0.000732504	7.1252e-06	5.50033e-06	1.14367e-05	3.21099e-06	5.23015e-06	2.0257e-05
GCA_000432435_1	1.91693e-08	2.71806e-07	5.5329e-07	3.21767e-06	2.51719e-07	1.83725e-05	4.11327e-07	9.11439e-07	5.87548e-07	1.21607e-06	1.23886e-05	3.23951e-05	5.33843e-05	1.98664e-05	3.80612e-05	0.00173113	7.00779e-06	0.0168949	2.65168e-06	3.27651e-05	2.2947e-06	1.26628e-05	2.89178e-05	1.42662e-05	5.48488e-06	8.77422e-07	5.7211e-07	3.54865e-06	1.75922e-06	9.2154e-06	5.77671e-06	3.29631e-06	2.04526e-06	4.67643e-05	1.04977e-05	8.95214e-07	4.78503e-07	7.63837e-07	1.38787e-06	1.63393e-05	1.54773e-05	6.27441e-06	1.19422e-05	6.4087e-06	2.12318e-06	9.40862e-06	1.01031e-06	1.64567e-05	8.97615e-07
GCA_000432735_1	0.000425367	7.61058e-06	2.00077e-05	2.54732e-06	0.000658431	6.78208e-05	1.93885e-05	8.7554e-05	2.33061e-05	4.90257e-06	2.29594e-05	0.000162164	3.46308e-05	5.96763e-07	3.19401e-06	0.00025347	5.55899e-06	1.45253e-05	5.02527e-06	6.0312e-05	4.35305e-05	0.000104736	5.762e-06	0.00013746	8.39794e-05	2.55452e-07	1.10021e-07	5.38058e-05	3.753e-06	0.000171362	8.78108e-06	1.56039e-06	2.60091e-07	0.000124701	1.61145e-05	1.38545e-07	0.000201689	3.70345e-07	6.08717e-08	1.37954e-05	0.000147435	0.000177683	0.000137664	2.38834e-07	7.12478e-08	2.98985e-05	3.47807e-05	1.16596e-07	1.47177e-06
GCA_000433035_1	0	0	0	3.83056e-08	0	3.20369e-07	1.49573e-07	0	7.83397e-08	1.62781e-07	1.27359e-07	1.53163e-06	1.54429e-07	3.58058e-06	1.11919e-07	2.66613e-05	0.000652441	2.11534e-07	5.95882e-08	4.07802e-05	3.30437e-06	1.35264e-07	1.25847e-07	0.00143725	1.48859e-07	1.66599e-07	1.32025e-07	4.27325e-07	4.14996e-07	0	2.44258e-08	0	1.30045e-07	1.20952e-07	0.000171642	7.46011e-08	2.27732e-06	1.50453e-07	2.43487e-07	1.4676e-07	6.55509e-07	2.75798e-07	6.81114e-08	4.77667e-07	9.97469e-08	8.36321e-08	8.00246e-08	1.83222e-07	5.17544e-07
GCA_000433635_1	4.60064e-07	5.94954e-06	1.07088e-07	1.35027e-05	5.03439e-08	2.78582e-08	1.40225e-06	3.90617e-07	7.83397e-08	4.3089e-07	2.19984e-06	2.94052e-05	8.68666e-07	3.97521e-06	0.00132467	1.2578e-05	3.10232e-06	1.38379e-06	0.00298842	5.68445e-06	1.20472e-06	0.000117679	5.86986e-06	1.71825e-05	0.00219069	8.55209e-07	2.01339e-06	7.06015e-07	1.98476e-06	1.39451e-06	3.786e-07	1.27757e-06	6.1476e-07	5.82767e-07	4.25852e-06	2.02489e-07	2.21529e-07	2.19892e-07	8.52204e-08	2.16471e-06	1.64332e-05	5.7458e-07	3.05366e-06	1.61876e-06	2.42243e-07	1.00359e-06	1.6305e-06	7.57872e-07	9.94655e-07
GCA_000434235_1	0.000272032	1.10988e-05	0.000149138	0.000421707	0.000327286	0.000159056	1.57052e-06	0.000125481	0.000135743	2.75865e-05	6.85425e-06	3.37064e-05	0.000112261	2.68255e-05	0.000123017	9.42694e-05	5.30545e-05	0.000174489	1.4609e-05	9.99553e-05	8.37565e-06	1.68143e-05	0.00011595	0.000339636	4.37646e-05	2.55452e-07	9.90191e-08	1.00328e-06	1.06636e-05	6.18699e-05	0.000197397	3.28656e-06	3.78314e-07	6.92943e-05	4.35048e-05	1.91831e-07	7.08893e-08	1.38879e-07	8.52204e-08	0.00147683	4.50754e-05	2.23397e-05	0.000275794	2.52102e-07	4.27487e-07	6.23269e-05	0.000544187	3.92345e-05	4.59563e-05
GCA_000434275_1	6e-06	1.2941e-05	1.83835e-06	0.000462521	4.53095e-07	2.56574e-05	0.000210169	3.90617e-06	2.63613e-05	4.41902e-05	4.68914e-06	3.74515e-05	0.000128784	2.3293e-05	3.29646e-05	2.90658e-05	3.75665e-05	4.67402e-05	0.0050474	1.34721e-05	7.82493e-06	0.000240145	5.22355e-05	6.33989e-05	6.14444e-05	1.21506e-05	5.50106e-07	2.1552e-06	7.44556e-05	4.49033e-05	0.000145724	2.29669e-05	1.69414e-05	5.39884e-06	3.66431e-06	7.03382e-07	1.03676e-06	5.77507e-06	1.55832e-06	5.2112e-05	7.88796e-05	0.000119271	3.41238e-05	2.51571e-05	7.66626e-06	3.24075e-06	3.62612e-05	7.67033e-06	1.27203e-05
GCA_000434635_1	4.40895e-07	1.81204e-07	1.58848e-06	1.04957e-05	3.02063e-07	7.06205e-06	1.6827e-06	1.45086e-06	1.2221e-05	4.51956e-06	8.67202e-06	1.2295e-05	1.35126e-05	3.33321e-05	0.00718445	0.00186004	5.47867e-05	0.0001533	7.26678e-05	0.000217441	3.75183e-06	0.000338534	0.000212619	4.08389e-05	0.00275327	1.1773e-06	2.17842e-06	4.42188e-06	1.41189e-05	6.49727e-05	3.84707e-06	4.78941e-05	8.41629e-05	1.53939e-06	0.000324029	3.09062e-07	4.51919e-07	9.83729e-07	6.4524e-07	1.16307e-05	3.59073e-05	7.04435e-06	0.000211645	8.0938e-06	1.00032e-05	8.25867e-06	3.60111e-06	1.78225e-06	2.77371e-06
GCA_000434995_1	3.83387e-08	0	0	7.66113e-08	6.71252e-08	3.92661e-05	5.6651e-06	0	1.37095e-07	2.8726e-07	2.90611e-06	3.62556e-05	1.77015e-05	1.69404e-06	4.39843e-05	2.42771e-05	3.28579e-05	1.09028e-05	3.23763e-06	0.00563309	3.17816e-06	2.61163e-06	4.58443e-07	0.00455501	6.03108e-05	1.0107e-06	1.76034e-06	1.59782e-06	6.76623e-07	1.42356e-05	3.05323e-07	5.2663e-07	9.81251e-07	1.46352e-05	2.34855e-06	1.00179e-06	7.6206e-07	2.60399e-06	6.33066e-07	1.36976e-06	0.00120024	6.66512e-07	4.75645e-06	6.76695e-07	9.97469e-07	9.51316e-07	3.80117e-07	3.66444e-07	6.4693e-07
GCA_000435055_1	1.91693e-08	3.02007e-08	1.24936e-07	3.83056e-06	1.84594e-07	1.35112e-06	5.98294e-07	2.04609e-07	2.54604e-07	5.26643e-07	4.19128e-06	4.38508e-06	7.44157e-06	7.82529e-06	9.96083e-06	0.000343718	1.65667e-05	2.51109e-05	4.07186e-06	0.00268024	3.67152e-07	8.34473e-06	3.61271e-05	3.88442e-06	2.58786e-06	7.77462e-07	3.74072e-07	4.75631e-06	5.5032e-07	8.4705e-05	3.786e-07	4.25205e-06	1.15859e-06	1.08857e-06	0.00173083	3.9432e-07	4.07614e-07	1.60869e-06	3.89579e-07	6.56751e-06	2.51278e-06	1.42496e-06	1.03075e-05	9.28797e-07	5.84232e-07	4.52659e-06	4.90151e-07	5.82979e-07	2.58772e-07
GCA_000435175_1	1.91693e-07	3.02007e-08	0	3.06445e-07	1.00688e-07	4.17873e-08	7.47867e-08	0	3.91699e-08	2.39383e-07	5.78906e-07	3.04228e-07	1.35126e-07	1.02027e-06	0.000341087	0.000312945	0.000199879	1.93906e-07	4.17118e-07	2.56027e-05	6.8841e-08	1.19968e-05	3.05628e-07	6.53237e-07	2.4848e-06	1.38833e-06	1.32025e-06	6.26124e-06	1.50932e-05	2.09177e-07	1.95407e-07	1.65791e-07	1.19405e-06	3.18873e-07	9.51871e-05	5.75494e-07	2.39251e-07	1.37722e-06	2.04529e-06	1.9568e-07	1.78444e-06	2.98781e-07	0.00234315	8.35918e-07	3.50539e-06	3.03167e-07	1.40043e-07	2.4152e-07	5.57977e-07
GCA_000435195_1	3.23195e-05	8.15419e-07	8.92403e-06	0.000310199	1.37607e-06	3.0644e-06	0.000336858	5.17846e-05	1.93695e-05	6.62613e-06	7.44011e-05	6.02372e-05	0.00214854	0.00309848	0.000295304	1.67404e-05	0.000238281	1.28154e-05	5.36294e-06	2.07482e-05	0.000889667	6.14513e-05	0.000649865	6.5137e-05	0.000572226	7.66356e-07	1.27625e-06	6.00112e-06	5.7919e-06	0.000357681	4.7093e-05	4.41296e-05	4.09406e-05	0.000153367	0.000111966	4.69028e-05	5.13947e-07	2.10634e-06	8.64378e-07	2.446e-05	0.00190966	2.26499e-05	0.000322451	7.73555e-06	1.96644e-06	2.75254e-05	2.67482e-05	3.08146e-06	1.82758e-06
GCA_000435555_1	3.83387e-08	1.66104e-07	8.74555e-07	1.47477e-06	3.35626e-08	5.85022e-07	6.54384e-07	3.34814e-07	8.22567e-07	3.73438e-07	3.2303e-06	1.57255e-05	5.33747e-06	4.4661e-06	3.27321e-05	0.00496416	1.50943e-05	0.000265176	1.12721e-05	0.000118805	1.15882e-06	4.82787e-06	8.96211e-06	1.29714e-05	2.87412e-06	2.19911e-06	9.90191e-08	2.73116e-06	2.02085e-06	8.66341e-05	5.12942e-07	6.21228e-06	5.08359e-07	4.94802e-07	2.30469e-05	2.23803e-07	1.06334e-07	9.25863e-08	3.53056e-07	3.10642e-06	8.01178e-06	1.58584e-06	1.40309e-05	6.60773e-06	2.56492e-07	3.59618e-06	1.02031e-06	2.66504e-07	1.97314e-06
GCA_000435655_1	5.96741e-05	1.28353e-06	2.64151e-06	2.44964e-05	0.000724851	2.95297e-06	2.26978e-05	0.000479659	6.01257e-06	1.66324e-05	3.70963e-05	1.39525e-05	1.91975e-05	0.00191076	4.70922e-06	3.66732e-06	1.25038e-05	3.85168e-06	1.48375e-05	4.2406e-06	0.0126376	1.88016e-05	0.000101226	4.00107e-05	7.48875e-06	3.95395e-06	6.05117e-07	3.36286e-06	0.000113023	4.05571e-06	9.59935e-06	5.46037e-05	1.47424e-05	3.61536e-05	3.31627e-05	5.5418e-07	1.00043e-05	5.86997e-05	7.29243e-06	2.22097e-05	0.00154842	5.64927e-05	2.326e-05	0.000111257	3.1178e-05	1.97895e-05	0.0051949	4.62385e-05	1.58498e-05
GCA_000435795_1	3.07668e-05	6.64415e-07	0.000141464	0.000731944	0.000100402	1.17422e-05	0.000623273	0.000126616	7.4031e-06	0.00129706	0.000740167	6.16744e-05	0.000209677	0.00150793	0.000274444	1.03352e-05	3.35586e-05	1.87913e-05	1.30697e-05	1.3654e-05	0.00212534	0.000566463	0.000238687	0.000909515	0.00105988	1.11621e-05	1.5403e-06	8.19349e-06	0.000727632	2.73789e-05	0.000390764	0.00146421	6.38641e-05	0.00133015	0.000118941	1.19362e-06	3.59763e-06	0.00012432	7.88897e-06	0.00519623	0.00150777	2.8051e-05	0.00143427	0.000110567	5.66562e-05	7.20804e-05	0.00618295	6.1346e-05	0.000396309
GCA_000435975_1	1.53355e-07	9.36222e-07	3.06987e-06	1.55138e-05	3.35626e-08	4.01158e-06	2.72972e-06	8.48196e-06	2.50687e-06	3.47585e-06	2.942e-05	0.000231266	3.35305e-05	0.00673484	0.00551058	0.00187643	0.00166992	0.0335911	0.00279361	0.00205262	5.08506e-05	0.000223778	0.000706191	0.000177424	1.34775e-05	2.09915e-06	3.28963e-06	5.83391e-06	8.02024e-06	0.00206351	4.93401e-06	0.0094107	8.33472e-06	3.22171e-06	0.000417717	1.7478e-06	1.40892e-06	2.88175e-06	1.8018e-06	1.0261e-05	0.000294724	1.27672e-05	5.92002e-05	1.03893e-05	3.61939e-06	1.17503e-05	6.48199e-06	1.42413e-06	2.24e-06
GCA_000436335_1	1.53355e-07	1.51003e-08	1.78481e-07	6.70348e-07	3.8597e-07	4.44338e-06	1.05636e-05	5.58024e-07	6.26718e-07	2.10657e-06	0.00112375	3.64444e-05	6.54395e-06	2.22824e-05	2.2909e-05	0.000695579	3.8031e-06	2.72791e-05	0.00206557	1.67919e-05	3.22405e-06	5.22326e-06	9.57336e-06	5.91412e-06	7.54601e-06	3.28756e-06	1.00449e-05	6.76288e-06	1.30814e-06	0.00486484	2.25939e-06	4.91521e-06	2.9674e-06	9.58817e-06	0.000967745	4.3695e-07	4.07614e-07	6.48104e-07	6.93937e-07	2.47658e-05	6.81001e-06	2.03401e-06	2.55418e-06	5.25434e-06	1.76695e-06	2.0699e-06	2.48076e-06	1.25757e-06	9.38048e-07
GCA_000436475_1	1.24601e-06	3.236e-05	5.35442e-08	5.14636e-05	6.71252e-07	6.31127e-05	6.69341e-05	9.3004e-08	3.66238e-06	2.99516e-05	8.34783e-06	5.88944e-05	7.79772e-05	1.54581e-05	3.1105e-05	2.00541e-05	3.56216e-05	1.15022e-05	0.000304943	2.49433e-05	1.64874e-05	9.21249e-05	4.41993e-05	3.77594e-05	3.7146e-05	0.00439474	3.15761e-06	4.64483e-06	0.000633771	7.80927e-05	0.000264336	3.23097e-05	6.4136e-05	7.32308e-06	1.38932e-05	1.16165e-06	1.41779e-06	4.51358e-06	6.76893e-06	1.11171e-05	9.03146e-05	4.06802e-05	4.31599e-05	1.50598e-05	0.000741447	2.13994e-05	1.49346e-05	1.72562e-05	0.000327193
GCA_000436535_1	4.02556e-07	0.000196093	3.03417e-07	1.74865e-05	3.52407e-07	1.06836e-05	0.000823009	2.2321e-07	2.25227e-06	6.12821e-06	1.86408e-06	1.48442e-05	2.11375e-05	5.8425e-06	1.39124e-05	0.000348941	1.3551e-05	9.86278e-06	2.39147e-05	0.000257721	1.67513e-06	2.91233e-05	7.79353e-06	2.40648e-05	9.50408e-06	0.00107152	3.85074e-07	1.98799e-06	0.00018904	2.46829e-05	0.00546714	1.33218e-05	2.13156e-05	3.37565e-06	2.84373e-06	5.22208e-07	2.65835e-07	1.40037e-06	4.30972e-06	1.44559e-05	7.33806e-06	1.04574e-05	1.37244e-05	7.64267e-06	0.000108696	1.90263e-06	2.51077e-06	1.02105e-05	1.06501e-05
GCA_000436755_1	5.55911e-07	8.00319e-07	1.19582e-06	4.36684e-06	3.18845e-07	1.47648e-06	4.82375e-06	5.76625e-07	7.83397e-07	3.61948e-06	1.07677e-06	1.93132e-05	6.67907e-06	6.55477e-06	2.0972e-05	7.20331e-06	1.63069e-05	4.01033e-06	7.99475e-06	7.50347e-06	4.64677e-06	1.98838e-05	3.00235e-06	3.58114e-06	2.97145e-05	2.32794e-05	1.32025e-07	1.87651e-06	0.000132546	8.94812e-06	3.03979e-05	4.54462e-06	1.20233e-05	2.03419e-06	1.99485e-06	8.52584e-08	1.77223e-07	2.24522e-06	8.4003e-07	1.00286e-05	1.61692e-05	1.67777e-05	6.73168e-06	8.82357e-06	3.1919e-06	2.00717e-06	1.78055e-06	0.00109525	8.91955e-06
GCA_000436835_1	5.7508e-08	1.20803e-07	3.56961e-08	5.8033e-06	1.24182e-06	0.00862814	6.39427e-06	2.4181e-07	3.13359e-07	5.45794e-07	4.52705e-06	0.00776868	3.84915e-05	5.55375e-06	0.00469795	0.00114228	2.3543e-05	2.72526e-05	3.96262e-06	8.78815e-05	9.98194e-07	3.83941e-06	2.48098e-06	5.53968e-05	1.90311e-05	2.44345e-07	3.08059e-07	1.05902e-06	6.94667e-07	2.30908e-05	3.29749e-07	1.70667e-06	6.02937e-07	5.79908e-05	1.57466e-05	3.9432e-07	2.12668e-07	5.67091e-07	4.26102e-07	1.4676e-06	2.58289e-05	9.42311e-07	7.09494e-06	1.28705e-06	1.09722e-06	1.06631e-06	5.2016e-07	7.49544e-07	5.90324e-07
GCA_000436875_1	1.62939e-06	3.97139e-06	0.000837182	1.61841e-05	2.23191e-06	1.14219e-06	9.27356e-06	3.05053e-06	3.27852e-05	3.25561e-06	3.48386e-05	0.000387366	4.87418e-05	3.6287e-05	0.000105351	0.00048641	0.000165132	8.47194e-05	2.27428e-05	5.77085e-05	3.95492e-05	8.24484e-05	2.35783e-05	0.000526217	1.76455e-05	1.22173e-07	2.86055e-07	1.53651e-05	1.9189e-05	5.12251e-05	6.16752e-06	0.000409884	1.57237e-06	5.99261e-06	0.000238251	4.26292e-07	1.69248e-06	7.35367e-05	2.19138e-07	2.67103e-05	0.000358782	1.5663e-05	5.71568e-05	2.66697e-05	1.56745e-07	5.20924e-05	9.28286e-06	2.90656e-06	3.05674e-06
GCA_000437595_1	4.23642e-06	7.70118e-07	4.6405e-07	5.05634e-06	8.39065e-08	3.20369e-07	0.000699163	1.91588e-06	2.95732e-06	3.15028e-06	1.55957e-05	2.18835e-05	5.46294e-06	1.03182e-05	0.0059536	0.00945565	5.00781e-05	0.00935855	6.86754e-05	2.80925e-05	3.61415e-06	0.0365349	1.57938e-05	8.3171e-06	1.13018e-05	6.5529e-06	3.03659e-06	1.24296e-05	7.2534e-06	1.04007e-05	5.33704e-06	7.52886e-06	8.35836e-06	3.56258e-06	0.000127119	2.90944e-06	3.71283e-06	3.57615e-06	6.36718e-06	5.49127e-06	4.4866e-05	7.94069e-06	4.22291e-06	1.36268e-05	4.67386e-06	6.53376e-06	3.44106e-06	2.53179e-06	7.26988e-06
GCA_000437735_1	7.11182e-06	4.4999e-06	0.000444078	0.00417759	8.47623e-05	3.01008e-05	0.000317993	3.06913e-06	0.000518687	6.6357e-06	2.20563e-05	3.89622e-05	1.5858e-05	0.0027293	0.00506688	0.000209017	0.00173266	0.00114305	0.000413642	0.000125751	4.9336e-06	0.00290833	0.000117227	3.02588e-05	0.00968023	8.49322e-05	2.24443e-06	4.21751e-06	0.000126366	0.000279007	1.21885e-05	2.3357e-05	2.56544e-05	6.80628e-06	0.000161894	1.69451e-06	1.58615e-06	4.38628e-06	4.61408e-06	0.00448373	7.45368e-05	1.72834e-05	0.000598359	0.00408445	1.38506e-05	7.03555e-06	3.55109e-06	1.72229e-05	1.51543e-05
GCA_000437915_1	0	1.51003e-08	3.56961e-08	3.83056e-08	0	2.78582e-08	0	3.72016e-08	0	1.05329e-07	5.09438e-07	2.41284e-07	1.83385e-07	1.01065e-06	6.19861e-07	1.4245e-06	0.00506826	0.000171025	1.88696e-07	3.64259e-05	1.14735e-07	2.60122e-07	2.51694e-07	7.81551e-07	3.54971e-07	3.22092e-07	1.65032e-07	7.24594e-07	2.16519e-07	1.2783e-07	1.34342e-07	6.24154e-07	9.45784e-07	1.31947e-07	0.00169198	1.06573e-07	2.03807e-07	4.05065e-07	2.8001e-07	1.5899e-07	4.37006e-07	6.89496e-08	1.92982e-07	1.45954e-07	1.25396e-06	1.35902e-07	1.00031e-07	4.99696e-08	2.50685e-07
GCA_000438155_1	6.70927e-07	3.18617e-06	1.03519e-06	1.67013e-05	1.00688e-06	2.15344e-05	8.17606e-05	8.68657e-06	3.42736e-06	5.30473e-06	1.2597e-05	3.09578e-05	9.56497e-06	4.20814e-05	0.000326977	0.00546836	1.61573e-05	0.000272826	4.95476e-05	1.24717e-05	2.11227e-05	4.05063e-05	5.71795e-05	0.000128419	0.00222376	1.27726e-06	7.92153e-07	1.11476e-06	7.99228e-05	5.07951e-05	1.82094e-05	8.52555e-05	0.000242464	1.28759e-05	2.3528e-05	4.15635e-07	1.74565e-06	8.30962e-06	8.64378e-07	1.07869e-05	3.1947e-05	2.24201e-05	3.22962e-05	1.68112e-05	3.70489e-06	8.74792e-05	1.18837e-05	6.27785e-05	2.09363e-05
GCA_000438255_1	1.91693e-08	1.66104e-07	2.32025e-07	0	1.67813e-08	1.11433e-07	0	0	1.95849e-08	2.8726e-08	7.52578e-07	5.24531e-08	1.44778e-07	6.10238e-06	4.4277e-05	0.00010217	2.13068e-05	8.81392e-08	1.29108e-07	0.000126115	3.44205e-08	0.000185967	1.34836e-07	1.16649e-07	1.29278e-05	3.44305e-07	3.30064e-08	5.27653e-06	0.00164791	1.04588e-07	6.10645e-08	3.90096e-08	1.58419e-06	1.31947e-07	6.58868e-05	8.52584e-08	1.06334e-07	2.77759e-07	9.2525e-07	8.561e-08	5.36243e-06	3.44748e-08	1.11249e-05	3.84787e-07	2.25143e-06	9.40862e-08	1.10034e-07	9.16109e-08	1.94079e-07
GCA_000438355_1	0	0	0	0	3.35626e-08	1.39291e-08	0	0	1.95849e-08	8.6178e-08	7.52578e-07	1.25888e-07	6.75629e-08	2.28117e-06	0.000527407	2.20242e-05	0.000607898	1.67464e-07	1.87703e-06	8.46528e-05	9.1788e-08	1.14974e-05	1.70792e-07	1.86639e-07	5.69214e-05	6.77503e-07	1.43028e-07	4.96068e-06	5.21451e-06	5.81047e-08	1.09916e-07	1.17029e-07	6.1476e-07	2.41903e-07	0.000362582	4.26292e-08	8.86116e-09	9.60583e-07	1.36353e-06	9.784e-08	3.24113e-06	1.14916e-07	7.26408e-05	4.11325e-07	1.95219e-06	1.98626e-07	3.00092e-08	1.33252e-07	3.87349e-06
GCA_000980495_1	2.62045e-05	1.49493e-06	4.1229e-06	9.71048e-06	5.22402e-05	4.32359e-05	2.05103e-05	9.20368e-05	7.55978e-06	2.39288e-05	6.86583e-06	0.000760927	5.48224e-06	0.00236314	2.83242e-05	1.69222e-05	6.87078e-05	4.28356e-06	1.17289e-05	5.06825e-05	1.7738e-05	0.00145641	0.00320496	3.97774e-06	0.000436672	4.02503e-05	3.17961e-06	1.4752e-05	0.0051187	0.00528473	0.00011474	7.58737e-06	6.65241e-05	1.37555e-05	5.30546e-06	1.44939e-06	1.96895e-05	4.56913e-05	1.56319e-05	0.00106048	0.000298867	0.000429085	0.00350938	1.75808e-05	3.49114e-06	0.00227739	0.00165505	2.86909e-05	0.000452212
GCA_000980705_1	2.74121e-06	0.00462255	2.10607e-06	0.000251247	3.44017e-06	9.59715e-06	1.83788e-05	3.31838e-05	5.01374e-06	5.66381e-05	1.72861e-05	0.000382688	3.46308e-05	5.05901e-05	0.000450527	0.00010318	9.41799e-05	7.06524e-05	0.000139079	0.00294297	1.65333e-05	0.00101476	0.000230174	0.000275199	0.000146157	7.29704e-06	2.22243e-06	2.96898e-05	0.000184177	0.000104879	6.14309e-05	5.06052e-05	0.000126274	1.12705e-05	3.62469e-05	6.12795e-06	5.83951e-06	1.20825e-05	4.94278e-06	0.000103833	0.000168302	7.77406e-05	6.30144e-05	3.51085e-05	1.4563e-05	3.36515e-05	2.63681e-05	7.81191e-06	5.35901e-05
GCA_001916065_1	1.91693e-08	0	0	1.91528e-08	0	6.96455e-08	1.1218e-07	0	1.95849e-08	8.6178e-08	1.04203e-07	1.78341e-07	2.79903e-07	7.16116e-06	6.31053e-05	2.4469e-05	1.85903e-05	1.14581e-07	5.95882e-07	0.000219158	5.73675e-08	4.74983e-05	1.34836e-07	4.19938e-07	2.12181e-05	7.21929e-07	3.30064e-08	1.08503e-05	6.61016e-05	2.32419e-08	1.22129e-07	3.90096e-07	1.51325e-06	1.20952e-07	7.35691e-05	1.38545e-07	7.97505e-08	1.15733e-06	2.82445e-06	7.338e-08	3.43232e-06	1.26408e-07	1.27255e-05	1.02168e-06	5.91357e-06	2.50896e-07	7.00215e-08	4.99696e-08	2.83032e-07
GCA_001916775_1	5.7508e-08	3.32208e-07	2.12392e-06	6.70348e-07	0	3.0644e-06	6.91777e-07	0	6.85473e-07	8.71355e-07	4.86281e-07	7.97288e-07	1.303e-06	4.71635e-07	0.000813095	0.00259496	3.55114e-06	3.15538e-06	0.000444429	0.00255335	3.21258e-07	7.38748e-06	1.66927e-05	2.64794e-06	2.89703e-06	5.5533e-07	1.32025e-07	8.84376e-06	6.7509e-05	1.56883e-06	5.37368e-07	2.73067e-07	2.19422e-05	4.17833e-07	2.59897e-05	4.3695e-07	1.48868e-06	1.95589e-06	1.05917e-06	5.69918e-06	1.21998e-06	8.27395e-07	4.29102e-06	7.93458e-06	1.22546e-06	1.21267e-06	3.40105e-07	2.33191e-07	1.35047e-06
GCA_001916835_1	8.43451e-06	1.73654e-06	6.13974e-06	1.78887e-05	1.92985e-06	8.07888e-07	2.78581e-06	1.82288e-06	3.8974e-06	2.55661e-06	6.22903e-06	4.50363e-05	0.00156178	1.46111e-05	0.00149351	0.00577799	0.00022306	0.00367784	0.000997666	0.00344302	2.1421e-05	3.84253e-05	0.0027889	0.000522904	0.000356552	5.81986e-06	1.08921e-06	3.82734e-06	2.45299e-05	0.00283757	3.6883e-06	2.89159e-05	3.79496e-06	2.93583e-06	4.50469e-05	9.485e-07	7.35477e-07	2.25679e-06	9.86122e-07	3.07951e-05	1.05155e-05	7.81428e-06	4.45789e-05	6.26275e-06	2.39393e-06	1.25239e-05	6.97214e-06	3.34796e-06	1.81949e-06
GCA_001916855_1	1.34185e-06	2.97477e-06	4.80113e-06	1.20471e-05	3.02063e-07	1.01265e-05	1.2639e-05	3.47835e-06	3.77989e-06	1.30225e-06	1.77956e-05	8.04107e-05	3.90803e-05	0.000306707	0.000463777	0.00543003	0.00778934	0.00207035	0.000194685	0.0140515	7.53809e-06	0.000698002	0.000158414	5.24222e-05	1.22637e-05	9.88488e-07	1.18823e-06	5.83391e-06	9.82457e-06	0.000130422	6.52169e-06	0.000394495	3.98411e-06	1.89124e-06	7.26919e-05	1.96094e-06	3.03052e-06	7.97399e-06	1.4244e-06	1.88954e-05	4.25353e-05	9.9862e-06	5.27523e-05	1.67582e-05	2.83566e-06	1.15935e-05	6.48199e-06	1.18261e-06	1.1483e-06
GCA_001916965_1	8.81789e-06	6.73627e-05	3.1948e-06	0.00016322	2.16479e-06	9.68769e-05	0.00015249	1.3467e-05	0.000214435	2.44841e-05	3.0161e-05	9.56431e-05	0.000128804	6.04848e-05	0.0001667	0.00156689	0.0010137	9.2837e-05	0.000122692	5.46275e-05	3.37436e-05	0.000258655	3.87789e-05	0.000235923	8.20099e-05	4.52039e-05	4.40085e-07	5.10932e-06	0.000200019	0.000122066	0.000350755	5.29946e-05	0.000127574	2.13975e-05	2.49145e-05	5.32865e-07	1.54184e-06	8.77255e-06	7.91332e-06	5.9499e-05	9.57498e-05	0.000262813	0.000344133	0.000148687	0.000125111	1.92981e-05	2.69583e-05	0.000225821	1.49764e-05
GCA_001917125_1	2.19105e-05	4.07709e-07	3.0663e-05	0	8.39065e-08	7.52171e-07	0.00410046	1.67407e-07	3.32944e-07	1.81931e-07	2.15353e-06	4.72078e-07	2.50948e-07	2.02129e-07	3.61586e-07	9.39562e-07	0.000587134	3.08487e-07	3.47598e-07	0.000211473	3.90099e-07	2.39313e-07	1.47421e-06	0.000136246	0.000507827	1.99919e-07	1.76034e-07	4.16177e-06	0.00919796	1.97556e-07	2.44258e-07	1.85296e-07	1.17041e-06	3.5186e-07	5.96758e-05	3.97517e-06	1.6659e-06	5.78664e-07	6.01412e-06	0.000884437	7.92073e-07	4.13697e-07	4.54076e-08	4.11325e-07	2.60767e-06	2.0908e-07	2.44475e-05	1.49909e-07	7.7486e-05
GCA_002160535_1	0.0131247	6.87066e-06	0.000283963	0.000298784	2.01376e-05	2.3387e-05	0.000333138	2.6841e-05	0.000195947	0.00413903	0.000356259	0.00035985	0.000950735	0.000429198	9.82222e-05	0.000243316	0.000831013	0.000100161	5.41856e-05	0.000394307	0.00032431	0.000217109	0.000156176	0.000226743	0.000156565	1.42831e-05	9.46182e-07	0.000129758	0.000196771	0.000132874	0.000549459	0.00169753	0.000123862	6.33237e-05	0.00117487	7.03382e-07	4.80807e-05	7.23909e-05	1.88094e-05	0.000786414	0.000193867	0.000399586	0.000135383	0.000617119	2.88696e-05	0.00121116	0.000160919	0.000249132	5.91132e-05
GCA_002404795_1	4.40895e-07	3.62408e-07	2.14177e-07	0.00076979	1.51032e-07	8.35746e-08	8.78744e-07	2.2135e-06	2.40895e-06	1.58951e-06	4.70072e-06	5.36071e-06	4.79696e-06	8.87444e-06	0.00207671	0.00235641	0.0161393	0.000631174	5.88036e-05	0.00584209	2.45533e-06	4.96001e-05	0.0010927	1.52577e-05	6.07803e-05	7.77462e-07	1.28725e-06	2.60111e-06	5.28668e-06	1.07726e-05	6.98578e-06	5.31506e-06	2.37628e-06	3.03479e-06	6.85324e-05	2.55775e-06	1.40006e-06	5.01123e-06	9.73947e-07	3.33879e-06	6.97389e-06	2.30981e-05	1.35428e-05	6.75368e-06	4.54561e-06	2.49851e-06	2.44075e-06	1.4741e-06	1.45559e-06
GCA_002437735_1	3.83387e-08	7.55017e-08	4.81898e-07	8.42915e-05	1.84594e-07	1.25362e-07	5.04811e-07	1.86008e-07	1.038e-06	3.63863e-07	3.31134e-06	5.00403e-06	2.91486e-06	6.13126e-06	0.000195385	0.000621475	0.000182202	0.000235852	4.34895e-05	0.000478517	2.48975e-06	1.95612e-06	1.59107e-05	8.04881e-06	1.93746e-05	7.77462e-08	3.30064e-08	1.52351e-06	6.85645e-07	7.01672e-05	1.02588e-06	5.22729e-06	5.32003e-07	4.61816e-07	1.45157e-05	8.52584e-08	1.15195e-07	3.47199e-07	7.3046e-08	1.07624e-06	6.76449e-06	1.3675e-06	5.68617e-05	2.13623e-06	9.97469e-08	2.01763e-06	6.30194e-07	2.83161e-07	4.52851e-07
GCA_002438685_1	3.83387e-08	1.51003e-07	3.74809e-07	6.89501e-07	1.84594e-07	2.78582e-08	6.73081e-07	1.48806e-07	3.91699e-07	4.59616e-07	1.8525e-06	4.72078e-07	2.52878e-06	3.08969e-06	0.000635745	8.43485e-05	2.34643e-06	4.75423e-05	0.000542819	0.00129231	1.60629e-07	1.13413e-06	2.82257e-06	1.73808e-06	6.87042e-07	7.77462e-08	3.30064e-07	4.64483e-07	2.16519e-06	3.00866e-05	3.92034e-06	2.40884e-06	1.65512e-07	6.04759e-07	0.00129647	8.52584e-08	7.08893e-08	8.91143e-07	8.52204e-08	1.82227e-06	9.74159e-07	6.43529e-07	6.92466e-07	2.18931e-06	4.27487e-08	1.5681e-06	7.00215e-07	4.41398e-07	3.15378e-07
GCA_002451755_1	5.7508e-08	1.20803e-07	4.6405e-07	9.00182e-07	0	2.64653e-07	1.1405e-06	4.6502e-07	9.20492e-07	3.15986e-07	2.52403e-06	4.3641e-06	2.59634e-06	1.26957e-05	0.000979691	0.000136408	1.26219e-05	0.000112827	0.000849907	0.002055	1.41927e-05	1.24234e-05	1.29533e-05	2.65961e-06	1.16797e-06	3.10985e-07	3.6307e-07	1.46777e-06	7.75861e-07	4.86569e-05	6.7171e-07	4.94447e-06	1.41868e-07	2.08917e-07	0.00209639	6.39438e-08	2.39251e-07	9.37436e-07	1.58266e-07	2.77621e-06	3.44142e-06	9.19328e-07	2.91744e-06	3.22425e-06	2.27993e-07	4.69385e-06	8.50262e-07	3.58115e-07	5.33717e-07
GCA_003149955_1	9.39297e-07	1.26843e-06	1.24936e-06	3.21384e-05	3.02063e-07	1.6297e-06	5.0668e-06	1.07327e-05	2.29144e-06	1.07244e-06	0.000108464	1.97224e-05	1.51148e-05	2.15797e-05	0.000102733	2.52267e-05	4.91254e-05	4.88291e-06	9.30569e-06	1.27104e-05	0.00126406	1.07795e-05	0.000213553	2.37615e-05	0.000175448	5.5533e-08	1.10021e-07	6.64025e-05	4.31235e-06	5.64777e-06	5.19049e-06	0.00196373	1.25316e-06	8.18073e-06	0.000107241	1.70517e-07	3.51788e-06	1.03002e-06	9.2525e-07	6.85492e-05	0.00195092	0.000110492	1.72776e-05	2.8806e-05	3.44839e-06	0.000273048	6.58403e-05	9.1944e-06	6.41269e-06
GCA_003293635_1	4.50863e-05	0.000220601	0.000924958	0.0111412	6.0077e-05	0.00388841	0.00221608	0.00591859	0.00642286	5.55752e-05	0.000588366	0.00771981	0.00221214	0.000388964	0.00474052	0.0020695	0.00302344	0.000910178	0.00287345	0.00371475	7.67692e-05	0.00667612	0.000993418	0.0130183	0.00966218	2.05694e-05	1.85276e-05	7.33326e-05	0.0237399	0.0159054	0.0196045	0.0016555	0.000431549	0.000102677	0.000240613	2.41708e-05	4.21791e-05	0.000131727	1.99416e-05	0.0046519	0.000803636	0.000214479	0.00252123	0.0823246	3.64931e-05	9.12427e-05	0.00012931	0.000266213	0.0010623
GCA_003343965_1	1.91693e-08	4.5301e-08	2.32025e-07	3.06445e-07	0	2.92511e-07	1.30877e-07	2.60411e-07	3.91699e-08	3.83013e-08	4.26075e-06	1.35329e-06	9.07273e-07	5.49696e-05	0.000207008	0.000182568	0.00013792	5.37649e-07	2.8801e-07	1.38246e-05	1.49155e-07	2.49717e-07	7.19126e-07	4.89927e-07	5.03831e-07	3.33198e-08	2.20042e-08	3.7716e-06	2.16519e-07	2.20798e-07	1.22129e-07	3.99849e-07	5.55648e-07	1.31947e-07	9.11974e-05	5.32865e-08	4.43058e-08	9.25863e-07	1.70441e-07	1.24746e-06	9.28638e-07	3.90714e-07	9.42208e-06	1.72491e-07	8.69223e-07	1.25448e-06	9.00277e-08	9.99392e-08	8.89529e-08
GCA_003449675_1	3.66134e-06	5.71246e-05	0.000233078	0.000166323	1.40124e-05	0.000184379	0.0012088	0.000197727	0.000531633	7.72729e-06	7.99817e-05	0.000734008	0.000517059	8.42591e-05	0.00138207	0.000485117	0.000261461	0.000370255	0.000216405	0.000195283	3.0749e-06	0.00149526	0.000740808	0.000449777	0.000853947	2.06583e-06	5.53407e-06	2.06231e-05	0.000432083	0.000486917	0.00175707	0.00425012	3.42847e-06	1.57237e-06	8.0926e-06	1.21493e-06	1.01903e-06	1.50453e-06	1.05917e-06	5.12804e-05	1.1171e-05	2.13744e-06	0.00302847	0.00021434	2.25143e-06	3.70072e-06	2.40074e-06	9.91064e-07	1.81464e-05
GCA_003486385_1	2.1853e-06	5.43613e-06	1.07088e-06	7.3317e-05	1.3425e-07	1.02936e-05	2.62315e-05	5.58024e-07	6.77639e-06	1.44588e-05	3.31134e-06	2.47684e-05	2.24502e-05	1.70174e-05	2.69381e-05	2.08724e-05	3.81806e-05	1.27626e-05	2.69835e-05	9.40207e-06	1.45828e-05	3.75721e-05	1.00857e-05	2.55112e-05	2.43785e-05	2.03473e-05	1.76034e-07	9.66125e-07	1.97394e-05	2.0325e-05	2.58303e-05	1.26099e-05	3.51832e-05	1.02919e-05	9.0688e-06	2.13146e-07	2.11782e-06	2.43039e-06	9.2525e-07	8.41424e-06	2.33343e-05	7.36037e-05	0.00877337	3.01726e-05	5.62858e-06	1.31721e-05	6.06186e-06	4.20411e-05	1.11919e-05
GCA_003487665_1	7.09265e-07	5.05862e-06	1.00128e-05	1.54563e-05	2.68501e-07	3.3012e-06	8.24524e-06	3.34814e-06	8.10816e-06	1.4363e-06	2.4233e-05	3.8018e-05	3.62909e-05	4.30632e-05	0.000128466	0.00285681	0.000118817	0.000286787	7.05326e-05	0.00493435	1.07392e-05	2.55544e-05	0.000174999	6.75983e-05	4.00431e-05	9.99595e-08	4.84093e-07	7.729e-06	2.85264e-05	9.96263e-05	1.06374e-05	7.17095e-05	1.9093e-05	5.39884e-06	0.000106208	8.09955e-07	6.38004e-07	2.77759e-06	6.81763e-07	2.51571e-05	8.32679e-05	1.5077e-05	0.000134032	2.96552e-05	2.18018e-06	1.67369e-05	5.45168e-06	1.17429e-06	2.51494e-06
GCA_003507655_1	2.95208e-06	1.81204e-06	4.81898e-07	0.00018381	3.35626e-08	1.88043e-06	7.77034e-05	2.3437e-06	2.14847e-05	1.0236e-05	0.000126711	0.00155358	1.00958e-05	0.000168894	0.0012939	0.00209991	0.00123884	0.000563377	0.00229985	0.00108565	1.43878e-05	0.0111743	0.00229509	0.000639694	9.11475e-06	2.36904e-05	6.93134e-07	8.41644e-06	7.13883e-05	0.000285131	2.82485e-05	7.89945e-06	4.18155e-05	2.23981e-05	7.99781e-05	1.0977e-06	2.15326e-06	3.01831e-05	8.14463e-06	1.60213e-05	0.00139879	8.37278e-05	0.00029591	1.89342e-05	2.86986e-05	1.25657e-05	2.80486e-05	7.50627e-05	4.50829e-05
GCA_003512525_1	5.7508e-08	9.06021e-07	0.000157759	1.492e-05	1.67813e-07	4.73589e-07	2.90733e-05	3.01333e-06	3.91699e-08	2.77685e-07	2.19984e-06	0.000823021	4.08176e-05	8.59531e-06	6.20722e-05	1.62756e-05	0.00147022	0.000673463	4.28042e-06	0.000221432	9.06406e-07	1.28188e-05	4.54847e-06	2.64794e-05	7.06508e-06	1.22173e-07	1.10021e-07	4.45904e-07	2.85084e-06	8.13466e-07	1.70981e-07	7.19728e-05	5.04812e-06	4.72811e-07	0.000936534	1.1723e-07	2.3039e-07	3.12479e-07	1.46092e-07	1.13739e-06	0.000382235	0.000168559	9.28585e-06	7.16501e-07	2.27993e-07	7.42235e-07	6.80209e-07	3.831e-07	4.69024e-07
GCA_003514385_1	1.53355e-07	1.35903e-07	2.49873e-07	9.19335e-07	5.03439e-08	2.84154e-06	9.72228e-07	1.65547e-06	8.22567e-07	7.1815e-07	7.12055e-06	2.31213e-05	2.32609e-06	5.42862e-06	0.00247792	0.000313592	1.05589e-05	0.000322686	0.00216018	0.00518668	1.00967e-06	3.43362e-06	2.0549e-05	3.25452e-06	5.25587e-05	5.2201e-07	8.58165e-07	1.67214e-06	2.6253e-06	0.000116988	6.11867e-06	5.8612e-06	2.32899e-06	8.68653e-07	0.00447658	5.22208e-07	1.42665e-06	2.61556e-06	4.26102e-07	8.59769e-06	1.57413e-05	8.27395e-07	3.49639e-06	1.95047e-06	1.70995e-06	2.13262e-06	1.3004e-06	1.39915e-06	5.90324e-07
GCA_003516765_1	3.20128e-06	4.213e-06	5.5329e-07	1.99189e-05	1.3425e-07	7.2292e-06	2.87929e-06	6.8823e-07	8.42152e-06	1.62781e-06	1.58505e-05	1.7939e-05	1.71127e-05	1.39951e-05	0.000152736	0.00306344	0.000204194	0.000505928	5.78006e-05	0.00019916	8.74281e-06	0.000139915	0.000124157	5.22823e-05	3.72148e-05	2.33239e-07	3.41066e-07	2.35958e-06	1.18274e-05	0.000476516	3.39519e-06	2.99009e-05	5.08359e-07	2.10016e-06	0.00015666	2.02489e-07	2.00262e-06	4.39785e-07	2.55661e-07	1.18386e-05	1.59416e-05	7.64191e-06	5.45232e-05	2.56215e-05	3.41989e-07	3.08394e-06	5.65174e-06	3.91428e-07	1.1855e-05
GCA_003521145_1	1.57189e-06	1.51003e-08	8.92403e-08	1.91528e-07	3.35626e-08	5.57164e-07	5.27247e-06	1.93448e-06	4.85706e-06	4.77043e-05	0.000312146	0.0001779	0.000188143	1.13481e-05	0.000199087	1.03049e-05	8.29517e-05	0.000140326	6.49114e-05	2.38747e-06	9.89934e-05	5.50419e-05	3.54709e-05	1.19332e-05	0.000510735	0.000218211	1.0177e-05	0.000516914	0.00018406	3.77913e-05	6.29575e-05	0.000196521	0.000156563	0.000260519	5.44694e-06	4.30449e-05	2.43593e-05	2.87943e-05	5.62333e-05	5.57444e-05	3.08818e-05	0.000403953	1.79019e-05	0.00029955	0.0102487	3.08289e-05	0.000481128	6.7842e-05	0.000179555
GCA_003522105_1	6.70927e-07	5.43613e-06	7.08568e-06	5.63284e-05	2.31582e-06	1.58374e-05	1.64905e-05	1.66849e-05	2.23464e-05	3.78226e-06	1.55957e-05	0.000151642	0.000150578	6.84834e-05	0.000589867	0.00301202	0.000560434	0.00252198	0.000647138	0.00299292	3.68988e-05	0.000100771	0.000914854	0.000477038	0.000164157	4.33158e-07	7.37142e-07	3.53007e-06	4.35836e-05	0.000349023	1.32876e-05	8.91565e-05	1.21533e-05	3.68353e-06	4.45234e-05	5.32865e-07	6.20281e-07	1.77071e-06	6.20891e-07	2.94009e-05	7.89615e-05	1.60652e-05	0.00088588	1.57232e-05	1.90944e-06	1.4322e-05	9.99307e-06	4.08918e-06	7.16475e-06
GCA_003522945_1	5.7508e-08	1.81204e-07	1.96329e-07	3.31344e-06	0	7.8003e-07	7.10474e-07	5.39423e-07	9.40077e-07	4.11739e-07	3.78605e-06	1.05116e-05	8.10755e-06	6.8339e-06	0.00112346	0.00153316	7.53928e-05	0.000242453	0.000375128	8.83476e-05	1.45713e-06	2.85614e-05	0.000100651	2.24083e-05	1.16912e-05	2.11026e-07	1.32025e-07	8.73229e-07	1.2071e-05	0.000387535	7.81626e-07	6.07575e-06	5.08359e-07	1.42943e-06	7.19845e-05	1.5986e-07	2.12668e-07	4.39785e-07	3.16533e-07	3.76684e-06	0.00551591	2.43622e-06	4.75758e-05	1.1809e-06	2.42243e-07	4.18161e-06	1.35042e-06	2.4152e-07	4.12418e-07
GCA_003525075_1	4.21725e-07	2.64256e-06	2.32025e-07	1.11086e-06	0	1.44584e-05	4.91723e-06	5.58024e-08	5.83631e-06	6.01331e-06	1.25044e-06	2.68036e-05	1.14664e-05	5.27461e-06	0.000983849	0.000371279	6.49913e-05	3.13776e-06	0.00028657	0.00140518	1.9046e-06	0.00162289	2.92145e-06	2.84974e-05	8.4987e-05	6.66396e-07	3.41066e-07	8.82518e-06	0.00170851	1.04007e-05	1.55837e-05	1.65791e-07	0.000131157	9.89605e-07	9.61491e-05	4.3695e-07	2.56974e-07	1.0416e-06	1.40005e-06	1.5899e-07	1.42027e-05	9.41162e-06	8.37089e-05	1.10792e-05	2.39393e-06	3.65891e-07	1.20037e-06	7.23726e-06	2.02166e-06
GCA_003525905_1	8.43451e-07	1.02682e-06	3.2305e-06	0.000238031	1.02366e-06	2.24258e-06	3.81412e-06	2.67293e-05	8.22567e-07	4.05037e-06	3.00452e-05	0.00337277	1.39083e-05	2.63442e-05	0.000897215	0.000777847	0.000613032	0.000593097	0.000158485	0.0012457	6.67758e-06	2.30989e-05	0.000234156	0.000802023	0.000467486	9.32955e-07	1.27625e-06	3.56723e-06	5.43825e-05	0.000386605	1.78308e-06	0.000511026	2.7546e-06	1.66034e-06	0.000815556	1.41742e-06	6.29143e-07	2.69658e-06	1.70441e-06	6.33636e-05	0.000706238	0.000623028	0.000470321	5.42683e-06	7.32427e-06	2.02494e-05	5.08156e-06	5.41337e-07	1.64967e-06
GCA_003526955_1	4.40895e-07	8.5921e-06	9.99492e-07	1.43646e-05	2.85282e-07	2.13115e-06	0.0238857	9.3934e-06	1.66472e-06	3.90386e-05	1.32222e-05	8.19948e-05	3.90899e-05	3.11472e-05	6.51974e-05	0.000610069	3.78342e-05	3.8129e-05	2.23357e-05	6.71333e-05	1.83461e-05	0.0137405	0.000100138	1.21082e-05	3.73865e-05	1.5527e-05	1.87036e-06	4.23609e-06	2.34924e-05	7.82205e-05	0.000179884	6.82669e-06	9.62808e-05	2.46522e-05	4.05479e-05	1.23625e-06	1.75451e-06	5.69406e-06	2.60531e-06	9.21775e-05	0.000117354	8.99217e-05	0.00771994	9.67674e-05	2.36543e-06	1.65173e-05	2.68182e-05	3.29799e-06	9.34895e-05
GCA_003531585_1	1.53355e-07	1.66104e-07	1.80266e-06	4.71159e-06	8.39065e-08	1.5322e-06	9.72228e-07	3.90617e-07	1.19468e-06	1.4363e-06	4.06392e-06	1.95965e-05	5.76215e-06	4.44685e-06	0.0197899	0.000512122	7.55896e-05	1.69315e-05	2.61195e-06	0.000364612	2.36354e-06	7.28343e-06	7.97331e-06	1.07084e-05	0.00201194	7.10823e-07	8.58165e-07	2.89838e-06	4.45669e-06	2.30095e-06	6.998e-06	1.32828e-05	4.40972e-06	6.92723e-07	8.12938e-05	6.50096e-07	7.26615e-07	2.11791e-06	6.93937e-07	2.76398e-06	9.31369e-06	9.72189e-06	0.00290208	3.38348e-06	3.02091e-06	2.98985e-06	2.2707e-06	6.41276e-07	1.08361e-06
GCA_003538135_1	2.49201e-07	2.26505e-06	1.09944e-05	1.76014e-05	6.71252e-08	6.97848e-06	1.29381e-05	1.13465e-06	1.62555e-06	1.80016e-06	1.23539e-05	4.3704e-05	1.05784e-05	4.76544e-05	0.000361767	0.000117758	6.01725e-05	0.00999819	0.000297842	0.000696572	0.000123478	0.000102582	4.5233e-05	1.38463e-05	1.91914e-05	2.84329e-06	4.51087e-07	1.31913e-06	4.88973e-06	4.37877e-05	1.23228e-05	3.01837e-05	3.57625e-05	4.10136e-06	0.000466796	2.87747e-07	1.93882e-05	6.63149e-06	1.327e-06	1.87975e-05	3.04721e-05	1.3675e-05	3.38514e-05	5.61259e-06	3.2774e-07	3.07348e-05	3.96122e-06	6.44608e-06	2.18339e-06
GCA_004557245_1	7.66773e-07	1.14914e-05	8.15657e-06	0.000185342	1.14113e-06	1.05165e-05	1.12367e-05	6.77069e-06	1.1418e-05	1.13755e-05	2.50088e-05	0.000122908	5.98124e-05	7.91962e-05	0.000200396	0.00172944	0.000232879	0.000936267	0.000136288	0.00310458	3.14948e-05	0.000158685	0.000200402	8.85602e-05	6.10551e-05	2.58784e-06	4.84093e-07	7.20692e-05	7.63502e-05	0.000148016	0.000107877	9.08242e-05	2.69667e-05	3.29099e-05	0.00051695	3.55954e-06	3.64194e-06	5.52046e-06	2.08425e-05	5.97558e-05	0.000216391	3.01999e-05	5.50113e-05	3.37419e-05	3.1178e-05	0.000146492	1.09434e-05	7.30389e-06	2.75673e-05
GCA_007197895_1	0.0031385	0.000474257	0.00243853	0.00315853	0.00289202	0.000631295	0.00135233	0.00249712	0.00240192	0.00220666	0.00202482	0.000538757	0.00287308	0.000847837	0.00082074	0.000199894	0.000934051	0.00138564	0.000349962	0.00116452	0.00218505	0.00230254	0.000959467	0.00340316	0.00133519	4.32047e-06	3.1356e-06	0.0013378	0.00150259	0.000610727	0.000936522	0.00213668	8.02734e-06	0.00554882	0.000344374	2.65367e-06	0.00344872	3.68031e-06	2.94619e-06	0.00267295	0.000585716	0.00125548	0.00228608	0.000709429	4.30337e-06	0.00532389	0.00329932	1.61235e-05	0.000260729
GCA_900066205_1	1.02173e-05	4.70225e-05	1.87583e-05	0.000116851	1.38781e-05	0.000126741	0.000269999	1.9289e-05	0.000137173	0.000180179	0.00085325	0.000998551	0.00058382	0.000637988	0.000727175	0.00239857	0.000566402	0.00336626	0.00367824	0.000358904	0.000374369	0.000656549	0.00080996	0.00187405	0.000271988	0.000141587	2.72853e-06	1.70744e-05	0.00116068	0.000584963	0.000444892	0.000983833	0.000469818	0.000374785	9.21594e-05	1.47071e-06	8.72736e-05	0.000376722	3.82274e-05	0.000473374	0.000336531	0.000379855	0.000692909	0.000439162	7.18605e-05	0.000217099	0.000270973	0.000323045	0.00059165
GCA_900066355_1	3.12268e-05	6.39349e-05	3.2305e-05	0.000361912	4.53095e-06	0.000117673	0.000172907	3.87827e-05	5.28597e-05	0.000249868	0.000351257	0.00126175	0.000396536	0.000494341	0.000946709	0.000725059	0.000318106	0.000457777	0.000549284	0.00037481	0.000571885	0.000648142	0.000655294	0.00098094	0.000962877	0.000707058	3.6197e-06	1.19651e-05	0.00108249	0.000946944	0.00033831	0.00155122	0.00257413	0.000328571	7.62855e-05	1.30019e-06	9.35916e-05	0.000311321	3.63161e-05	0.00214405	0.000517324	0.000544024	0.000981463	0.000827784	5.85942e-05	0.00593386	0.000384688	0.000319889	0.000444004
GCA_900066385_1	1.61406e-05	5.15979e-05	8.2351e-05	0.000927513	7.61871e-06	0.000138274	0.000193099	0.000109987	0.000173366	7.70718e-05	8.26563e-05	0.000539071	0.000227021	0.000336805	0.00101565	0.000861841	0.000471238	0.000427792	0.000363776	0.000417045	0.000378694	0.000542709	0.000428069	0.000395196	0.000986374	0.000336386	3.06959e-06	7.64354e-05	0.000605596	0.000664729	0.000330469	0.00057468	0.000340636	9.24841e-05	0.000211483	8.73899e-07	9.4717e-05	8.31772e-05	2.49209e-05	0.000261111	0.000349723	0.000372902	0.00105765	0.000357507	6.96233e-05	0.000168602	0.000170132	0.000157737	0.000183874
GCA_900066615_1	2.6262e-05	6.02655e-05	2.10072e-05	0.00139948	5.40358e-06	0.00016864	0.000609867	3.33326e-05	7.10345e-05	0.000751711	0.000234214	0.00154899	0.000358469	0.000724547	0.00375916	0.000984914	0.000704259	0.000678478	0.00263621	0.000261837	0.00101288	0.000637321	0.000975126	0.000422084	0.000499285	0.000497109	2.70652e-06	8.6524e-05	0.0043744	0.00504776	0.000558264	0.000931384	0.00104169	0.000524293	0.000185493	2.36592e-06	9.03927e-05	0.0010545	0.000448783	0.000705867	0.000624709	0.00100957	0.000683793	0.000648606	0.000134373	0.000399354	0.000925185	0.000812414	0.00100099
GCA_900066645_1	0.000118313	1.42396e-05	0.000287515	0.000725011	8.44099e-05	0.000167372	7.85074e-05	0.000148081	0.000103389	3.04879e-05	0.000400036	0.00112871	0.000606	0.0012625	0.000587654	0.000748952	0.00103263	0.000225927	0.000253459	0.000511611	0.000830199	0.000845658	0.00080258	0.000975842	0.000433065	1.32169e-06	2.01339e-06	5.69085e-05	0.000153025	0.000171757	0.000444403	0.00132972	0.000274065	0.000366495	0.00142126	2.00357e-06	8.34101e-05	0.000104935	1.10421e-05	0.00148181	0.00159921	0.000903343	0.000646434	0.000301355	9.37621e-06	0.00140082	0.000436454	8.60476e-05	3.94223e-05
GCA_900112995_1	9.33546e-06	0.000105778	1.68129e-05	0.000283596	4.61486e-06	0.00227599	0.000142057	1.89728e-05	3.57425e-05	0.000952315	5.07238e-05	0.00261487	0.00283655	0.000138102	0.000456476	0.000173082	0.000146542	0.000109363	0.000141035	0.000166361	7.87082e-05	0.00411073	0.00137712	0.000176269	0.000189074	0.202043	9.3298e-06	2.23695e-05	0.0273184	0.0023723	0.000331642	0.000132682	0.00213705	4.64455e-05	4.33633e-05	1.26929e-05	2.73544e-05	3.92103e-05	5.21549e-05	0.000283406	0.000354712	0.00118924	0.000243986	0.00021373	0.0219359	8.51689e-05	5.59072e-05	0.00011428	9.29396e-05
GCA_900316325_1	9.00959e-07	6.47805e-06	1.42785e-06	6.87203e-05	5.37001e-07	3.55192e-06	1.27324e-05	5.76625e-07	7.01141e-06	7.01872e-06	0.000241138	0.00104607	1.05012e-05	2.96264e-05	0.000347217	0.000228293	1.9732e-05	0.000695013	0.00139795	1.18464e-05	2.79036e-05	3.23072e-05	0.000206146	2.46014e-05	3.3333e-05	3.02877e-05	7.37142e-07	3.45576e-06	0.0055486	2.08944e-05	2.20321e-05	3.78393e-05	2.31481e-05	8.58757e-06	7.04565e-06	8.84556e-07	1.55956e-06	5.48342e-05	2.02581e-05	2.12557e-05	0.000911676	1.90646e-05	6.5001e-05	4.0814e-05	1.91657e-05	1.1928e-05	5.31163e-06	2.26029e-05	1.14587e-05
GCA_900317525_1	3.06709e-07	5.13412e-07	9.99492e-07	0.000497839	7.55158e-07	6.26809e-07	1.15919e-06	2.79012e-07	1.76264e-06	1.17777e-06	7.05108e-06	6.19996e-06	6.54395e-06	7.95042e-06	0.00107958	0.00343478	0.00101143	0.00122363	2.8503e-05	0.00263534	2.65038e-06	1.08627e-05	7.88701e-05	2.20234e-05	0.000105507	2.11026e-07	6.16119e-07	6.27981e-06	6.87449e-06	0.00040901	1.83194e-06	1.27659e-05	1.58419e-06	2.53999e-06	4.99421e-05	4.79579e-07	1.06334e-06	2.41882e-06	7.79158e-07	7.02002e-06	1.28371e-05	4.2404e-06	2.6064e-05	5.77181e-06	3.09215e-06	7.161e-06	1.34041e-06	2.27362e-06	1.18065e-06
GCA_900317585_1	0.000536875	0.00769278	0.000609993	0.000756325	3.35626e-06	0.000983534	0.00992386	2.3623e-06	0.000158853	0.00902221	0.000693669	0.0139911	0.0053784	0.0023387	0.00227271	0.00097861	0.00467215	0.00066657	0.00767794	0.00141186	0.00286179	0.00922629	0.00915666	0.000106746	0.000618418	3.47859e-05	7.2724e-06	1.99542e-05	0.0269064	0.0073672	0.0251	3.01252e-05	0.000181886	0.000705291	1.21389e-05	9.30383e-06	8.75483e-06	2.30308e-05	2.84393e-05	1.50184e-05	0.010925	0.024512	0.00635003	0.0134066	3.41989e-05	9.90623e-05	4.50138e-05	6.28951e-05	0.00285509
GCA_900317855_1	2.8754e-07	2.41606e-07	5.88986e-06	2.26961e-05	1.51032e-07	1.5322e-07	9.12398e-06	8.18435e-07	3.1473e-05	1.53205e-06	0.00386678	4.26969e-06	0.000180489	9.46158e-06	0.000202178	0.00259053	7.89833e-05	0.000919583	0.00710697	0.00069722	1.85871e-06	0.00555887	0.00976812	1.69258e-05	0.00104405	1.16619e-06	9.79189e-07	3.04701e-06	1.669e-06	0.000142043	2.11283e-06	0.00150211	8.57117e-06	3.23271e-06	5.03948e-05	1.1723e-06	7.17754e-07	1.01845e-06	6.57414e-07	2.95966e-06	2.1823e-05	4.09101e-06	0.0001231	2.98542e-06	1.48338e-05	2.46715e-06	1.53047e-06	1.9155e-06	3.43682e-06
GCA_900539115_1	2.85623e-06	2.10952e-05	2.70577e-05	3.11808e-05	1.42138e-05	1.96122e-05	3.26631e-05	4.10148e-05	2.69097e-05	4.6335e-05	1.80156e-05	0.000102011	3.08859e-05	2.20514e-05	0.00332873	0.000329938	7.76998e-05	0.000191985	5.9479e-05	0.00131229	0.00010395	0.00012822	6.68517e-05	0.000899425	3.2165e-05	2.30573e-05	3.96076e-07	2.74974e-06	5.46802e-05	1.75709e-05	3.83241e-05	4.56608e-05	4.36834e-05	6.49621e-05	0.000508688	4.58264e-07	0.00015391	0.000159295	2.23277e-05	5.36041e-05	0.00168353	5.8814e-05	0.000100362	0.000245123	3.47119e-05	4.93221e-05	2.57079e-05	0.000111407	5.17221e-05
GCA_900539195_1	2.30032e-07	2.12915e-05	0.000798469	6.62687e-05	2.85282e-07	1.18537e-05	9.14829e-05	1.55131e-05	4.32827e-06	3.65778e-06	1.83745e-05	0.0041636	0.0002326	3.6441e-05	0.000144893	3.1733e-05	0.00658538	0.00265054	1.28214e-05	0.000976065	7.59546e-06	7.80575e-05	5.85458e-05	0.000157512	1.11988e-05	7.21929e-07	6.82131e-07	2.74231e-05	9.98696e-06	2.03831e-05	9.0864e-06	0.000439853	1.59601e-06	1.14574e-05	0.00458243	7.99298e-07	7.88644e-07	1.30778e-06	5.96543e-07	2.3824e-05	0.00171904	0.000779038	8.59339e-06	9.68603e-07	7.83726e-07	1.81691e-05	5.5377e-05	6.49605e-07	1.17256e-06
GCA_900539695_1	1.84026e-06	1.60517e-05	4.59588e-05	0.00021003	3.8597e-06	3.75529e-05	8.29198e-05	8.99907e-05	0.000223112	4.77809e-06	1.86176e-05	0.000216149	5.16277e-05	0.000124136	0.00183903	0.00405961	9.18256e-05	0.000198683	0.00104155	0.000286939	4.2211e-05	0.000454819	0.000275623	0.000187409	0.000141038	3.64297e-06	1.44128e-06	9.66311e-05	0.000175345	0.000976066	0.000209036	6.27275e-05	2.37392e-05	4.65114e-06	7.44604e-05	1.83306e-06	1.0979e-05	5.85608e-06	5.028e-06	6.63967e-05	0.000281323	1.23535e-05	8.85448e-05	0.00065386	1.23116e-05	2.94385e-05	1.60649e-05	6.29617e-06	4.18806e-05
GCA_900539885_1	1.6869e-05	0.000129591	0.00269977	0.00185035	0.000199043	0.000631796	0.00553413	0.00318775	0.00908161	9.23924e-05	0.000572075	0.00137536	0.00175123	0.000162021	0.00498598	0.00505674	0.00375049	0.000640137	0.00222325	0.00711629	3.50515e-05	0.00210318	0.000369001	0.0013625	0.00614499	4.93133e-06	9.08775e-06	4.01685e-05	0.00250629	0.00238737	0.000831894	0.0018928	2.43776e-05	9.0164e-06	0.000118135	3.9432e-06	2.48644e-05	8.59895e-06	3.55491e-06	0.000528752	0.000102888	2.20064e-05	0.00209177	0.000914693	5.14409e-06	4.33633e-05	1.6145e-05	8.56146e-06	0.000110568
GCA_900539945_1	1.15208e-05	0.00629084	0.000330796	0.00042548	2.11948e-05	0.000551551	0.000698377	0.000432227	0.0115838	1.28692e-05	0.000101274	0.00189004	0.00154981	8.91679e-05	0.00465551	0.0106639	0.00379464	0.00484865	0.00211477	0.00134511	5.70233e-06	0.00026341	0.00119161	0.0195176	0.00275071	1.78816e-05	1.20913e-05	9.42901e-05	0.000468467	0.00198629	0.000458045	0.000830535	2.51224e-05	5.93763e-06	3.19177e-05	3.74071e-06	3.08368e-06	4.27054e-06	3.59143e-06	0.000111721	2.07851e-05	8.87151e-06	0.000523879	0.00104645	6.5548e-06	1.01822e-05	4.38135e-06	3.21471e-06	5.10104e-05
GCA_900540595_1	9.58467e-08	6.59885e-06	5.07956e-05	0.000349424	1.61436e-05	4.94344e-05	0.000115546	5.97644e-05	0.000116374	6.88466e-06	5.30626e-05	0.00165779	4.72361e-05	0.000229657	0.000559382	0.000710804	8.27155e-05	9.00606e-05	0.000381106	0.00815437	0.000142661	0.000677608	0.000289943	8.88752e-05	0.000264522	2.5212e-06	1.06501e-05	5.67599e-05	0.000331915	0.0090247	0.000182412	9.20432e-05	1.18223e-05	9.53869e-05	6.95935e-05	2.23803e-06	7.78896e-06	8.78413e-06	3.81057e-06	7.4921e-05	0.00702347	7.62927e-05	0.000184321	4.11723e-05	2.29418e-06	0.000270999	0.000105282	1.1035e-05	5.14471e-05
GCA_900540775_1	1.91693e-08	2.64256e-06	6.87151e-06	0.000207329	4.53095e-07	1.42077e-05	3.58789e-05	6.08246e-06	2.24443e-05	1.21128e-05	7.17844e-06	0.000485213	2.07418e-05	0.000140518	0.00106034	0.00552326	1.73147e-05	3.55465e-05	0.000236972	0.000314031	3.39501e-05	0.000473891	0.000205463	0.000415167	6.19483e-05	6.99716e-07	1.07821e-06	2.55094e-05	0.000119645	0.000479817	9.22929e-05	3.61912e-05	4.98901e-06	2.03419e-06	5.62662e-05	8.84556e-07	5.05086e-07	6.01811e-06	7.18286e-07	9.20919e-06	0.00872482	1.65019e-05	9.27337e-05	3.32907e-05	8.97722e-07	2.04167e-05	2.42675e-05	5.60492e-06	3.30662e-05
GCA_900540805_1	9.39297e-07	3.60898e-06	4.21214e-06	1.43072e-05	7.7194e-07	2.56295e-06	4.82001e-05	3.58995e-06	4.89623e-07	2.23105e-06	3.1643e-05	5.47191e-05	2.20834e-05	0.000129931	0.000302148	0.000177476	5.03537e-05	0.000403096	1.86809e-05	6.694e-05	1.48926e-05	5.20869e-05	0.00020914	0.000737306	0.00108628	6.26413e-06	1.77134e-06	3.8998e-05	1.14846e-05	5.32123e-05	7.1934e-06	5.94897e-05	0.00013747	5.5143e-05	0.000101016	7.09777e-06	1.50817e-05	4.18953e-06	3.60604e-05	2.69182e-05	6.14449e-05	1.7088e-05	0.000164103	5.55952e-06	1.57885e-05	1.51374e-05	1.25939e-05	8.1617e-07	0.000121607
GCA_900541315_1	7.28435e-06	0.000328704	3.99618e-05	0.000591707	3.79257e-06	0.000393427	4.06653e-05	5.00362e-06	1.42382e-05	1.53301e-05	4.1415e-05	0.000221562	3.34919e-05	0.000338817	0.000438199	0.000411437	9.70933e-05	0.000275911	0.000717919	0.000210575	0.00274452	0.000555445	7.14811e-05	0.00070861	0.000176902	0.000217567	9.24178e-07	4.45904e-06	0.000161424	0.000733839	0.000653818	0.000462879	0.00070669	5.07008e-05	2.08682e-05	7.67326e-07	9.25992e-06	1.34134e-05	3.57926e-06	0.000215737	0.000790762	0.000188922	0.000144941	4.56305e-05	0.020066	7.82797e-05	0.00108765	6.03633e-05	0.00172664
GCA_900541905_1	4.96294e-05	9.27161e-06	6.66268e-05	4.35343e-05	7.97112e-06	5.01726e-05	1.20781e-05	2.26744e-05	1.90953e-05	3.39062e-05	0.000181406	0.000189555	0.000163029	8.76279e-05	6.23047e-05	3.29352e-05	0.000284784	5.1914e-05	1.14608e-05	7.10783e-05	0.000132507	0.000132569	0.000882098	0.000419098	6.87729e-05	6.5529e-05	2.97057e-07	6.45074e-05	0.000360352	7.08296e-05	5.29185e-05	0.000210837	0.000219103	6.7546e-05	0.000681504	4.26292e-07	0.000152713	0.00017169	4.5532e-06	0.000127828	0.000437489	7.19259e-05	8.98957e-05	0.000250112	5.41483e-07	0.000138767	5.56471e-05	1.36001e-05	6.37469e-05
GCA_900542115_1	3.08626e-06	2.62746e-06	1.68307e-05	4.88588e-05	1.64457e-06	1.60742e-05	3.93378e-05	1.84148e-05	3.12576e-05	5.38134e-06	1.18328e-05	8.37991e-05	0.000183896	5.09944e-05	0.000702622	0.00123099	0.000150085	0.000808289	0.000589745	0.000348445	2.78232e-05	0.0013052	0.00129089	0.000124908	9.22811e-05	1.3439e-06	6.26021e-06	1.98799e-06	0.00125505	0.000583417	5.15018e-05	0.000565883	7.61356e-06	4.80508e-06	4.15807e-05	4.68921e-07	7.00032e-07	2.17578e-06	8.88727e-07	3.04649e-05	3.67995e-05	1.34107e-05	0.000234156	0.000116378	8.54974e-07	2.0124e-05	1.99361e-05	2.88158e-06	6.17818e-06
GCA_900542245_1	3.5655e-06	6.99146e-06	4.17645e-06	0.000597166	1.14113e-06	2.29691e-05	9.84194e-05	8.72378e-06	1.37682e-05	4.48126e-06	6.88551e-05	7.61829e-05	5.05177e-05	2.70083e-05	0.000254221	0.000292608	0.000124872	0.000417216	4.08875e-05	6.84976e-05	2.21553e-05	7.5217e-05	8.11264e-05	7.37457e-05	6.00016e-05	2.89105e-05	3.59769e-06	0.000202032	5.66469e-05	0.000131909	4.85829e-05	3.82977e-05	5.85086e-05	1.32277e-05	2.06984e-05	7.10842e-06	7.08893e-06	3.11553e-05	3.36255e-05	5.99882e-05	7.72954e-05	3.41415e-05	5.55562e-05	4.80188e-05	7.78026e-05	1.86813e-05	3.12496e-05	1.34835e-05	1.80898e-05
GCA_900542375_1	1.37252e-05	1.89207e-05	5.77207e-05	7.6209e-05	5.37001e-06	0.000167163	5.36221e-05	3.55461e-05	1.12222e-05	5.12089e-05	0.000704251	0.000987714	0.000230882	0.000179414	1.33012e-05	1.30427e-05	0.000591071	3.60049e-05	4.94781e-05	1.36995e-05	0.000284084	0.000363797	0.000206928	9.18381e-05	7.68113e-05	4.26938e-05	3.74072e-07	0.000210058	0.000154333	0.000263121	0.000284793	0.00116777	0.000577602	1.76809e-05	0.000557314	1.33216e-06	6.99234e-05	0.00158437	1.06891e-05	0.000304148	0.000149629	0.000220512	0.000362409	0.000630415	2.84991e-06	0.000502786	4.10626e-05	3.65361e-05	6.42321e-05
GCA_900542395_1	4.79233e-07	1.01172e-06	3.92658e-07	1.13959e-05	3.02063e-07	4.74982e-06	1.22089e-05	7.0683e-07	0.000125853	1.26394e-06	1.3118e-05	5.18342e-05	6.14822e-06	1.68826e-05	0.00141377	0.00496932	0.00471846	0.000332937	0.000235314	6.50073e-05	1.20472e-06	0.000111915	6.35348e-05	1.07551e-05	9.42049e-05	2.78776e-06	9.3518e-07	3.361e-05	4.42963e-06	4.59259e-05	1.74034e-05	5.07808e-05	8.07463e-06	5.44283e-06	9.76205e-05	5.43523e-07	9.48144e-07	5.52046e-06	1.34892e-05	2.65391e-06	9.89728e-05	2.89588e-06	3.34995e-05	9.487e-06	2.4837e-05	4.51614e-06	4.09126e-06	2.27362e-06	5.13501e-06
GCA_900542445_1	1.72524e-07	3.77509e-06	2.5023e-05	0.00025117	6.71252e-08	0.000131686	8.73135e-06	1.63501e-05	1.01058e-05	2.18318e-06	3.06705e-05	0.00162219	1.1312e-05	3.16958e-05	0.00142284	0.000577821	0.000548174	0.00288541	0.00100858	0.000662056	4.92787e-05	0.00180028	0.00147715	5.64816e-05	0.00309355	8.88529e-07	2.00239e-06	5.92681e-06	9.94185e-06	0.00155273	4.1646e-06	3.11492e-05	5.96199e-05	2.88855e-05	7.24797e-05	6.18124e-07	1.87857e-06	3.34468e-06	5.72194e-07	5.15495e-05	0.00414532	4.48172e-06	2.39866e-05	1.24724e-05	8.54974e-07	8.64547e-06	6.1619e-06	7.24559e-07	5.87898e-06
GCA_900543575_1	1.85943e-06	2.20465e-06	3.72132e-05	4.04507e-05	4.53095e-07	3.02261e-05	4.93593e-06	9.3376e-06	1.18293e-05	4.31847e-06	1.63252e-05	0.000895134	1.46611e-05	1.9491e-05	0.000384805	0.000944058	0.000191856	0.000429159	0.000611365	0.000218897	3.47991e-05	0.000695297	0.00052498	3.28485e-05	0.000115446	1.42165e-06	3.52068e-07	3.82734e-06	0.000513701	0.000589983	1.48997e-05	1.77884e-05	2.25451e-05	2.46302e-05	1.0526e-05	7.24697e-07	5.90153e-06	1.0902e-05	6.33066e-07	2.13903e-05	0.000161692	1.97081e-05	0.00104159	0.000110593	1.65295e-06	2.37829e-05	1.01731e-05	1.99295e-05	1.71517e-05
GCA_900543625_1	2.68371e-07	6.64415e-07	0.000124151	0.00056045	3.52407e-07	2.24258e-06	4.28154e-06	8.55637e-07	0.000668473	1.17106e-05	0.000502236	0.000126402	8.34015e-05	8.41628e-05	0.00112891	0.00213916	0.000143919	0.00675129	0.00437797	0.00287851	0.000118911	0.00184598	0.00292726	4.7033e-05	0.00021825	1.05513e-06	2.28844e-06	3.45576e-06	1.18995e-05	0.000177882	1.37884e-05	0.000565805	0.000108127	6.06958e-06	0.000189426	1.07639e-06	9.9245e-07	2.75444e-06	1.59484e-06	8.87898e-06	4.20618e-05	7.05584e-06	5.09246e-05	2.21717e-05	3.03516e-06	1.4782e-05	5.2016e-06	2.33275e-05	7.43161e-06
GCA_900544105_1	3.23962e-06	2.91437e-06	9.92353e-06	4.50091e-05	3.37304e-06	4.42945e-06	1.27511e-05	1.06025e-05	1.17118e-05	6.47292e-06	2.24037e-05	6.17374e-05	0.000937165	4.01179e-05	0.000884732	0.00320111	0.000377027	0.00238773	0.000641437	0.00144076	3.43402e-05	0.000104267	0.00101172	0.00034029	0.000188822	1.07734e-06	4.62089e-07	6.6514e-06	3.64384e-05	0.00143911	2.45113e-05	5.10539e-05	2.51815e-06	7.72991e-06	5.86713e-05	1.36414e-05	4.69642e-07	1.20362e-06	4.26102e-07	4.79905e-05	4.59767e-05	1.50425e-05	0.000155589	5.94032e-05	6.12731e-07	3.59305e-05	9.53293e-06	3.26468e-06	9.87377e-06
GCA_900544265_1	3.02875e-06	2.34055e-06	9.15606e-06	0.000131829	1.99865e-05	6.10095e-06	1.7201e-06	1.62943e-05	3.13359e-07	3.89716e-06	7.91944e-06	2.68036e-05	5.73319e-06	0.000291143	5.05618e-05	9.62294e-05	6.2204e-06	3.54496e-05	7.73654e-06	7.84908e-05	3.21258e-07	9.19793e-06	4.34172e-06	1.65642e-06	0.00014721	1.44386e-07	4.40085e-08	3.53007e-07	8.56154e-06	1.17023e-05	5.27598e-06	2.31132e-06	2.48268e-07	2.81488e-06	6.76411e-05	3.73006e-07	1.59501e-07	1.0416e-07	7.3046e-08	0.000888424	1.02059e-05	0.000440392	4.00722e-06	1.85759e-07	1.13996e-06	2.44624e-06	0.000177855	0.00107841	2.49068e-06
GCA_900544435_1	1.96102e-05	1.55081e-05	3.01811e-05	1.07447e-05	4.36314e-07	3.20926e-05	1.72757e-05	2.10189e-06	0.000296633	4.96385e-05	6.55322e-06	0.000154558	0.00115072	0.000163292	0.000206638	5.37167e-05	0.000156297	4.18837e-05	0.000110844	0.000104833	9.12373e-05	0.000160516	0.000243954	0.000251718	1.0798e-05	2.30129e-05	1.30925e-06	0.000241067	0.00196879	8.55185e-05	0.00143797	5.79781e-05	0.000238314	2.93583e-06	3.18186e-05	1.00179e-06	6.13813e-05	0.000392936	1.30509e-05	0.00072859	1.11163e-05	5.38956e-06	0.00589433	1.91332e-05	6.89679e-06	2.37724e-05	2.10665e-05	1.68064e-05	0.000684128
GCA_900544825_1	4.5508e-05	0.0136312	8.02628e-05	4.09487e-05	4.0208e-05	2.64374e-05	8.39481e-06	6.62188e-06	0.0159323	2.43213e-06	3.13767e-06	3.38847e-06	1.76629e-06	2.70468e-06	0.00178784	0.0012937	0.00127457	0.000265361	0.00677558	3.22876e-06	2.31994e-05	9.47886e-06	3.58664e-06	3.80277e-06	6.00016e-06	1.66599e-06	4.82993e-06	1.78362e-05	3.78909e-06	0.00978576	6.55345e-05	4.06675e-06	1.52508e-06	3.95842e-06	1.25916e-06	9.80472e-07	2.15326e-06	1.60869e-06	1.22961e-06	7.24016e-06	4.08783e-06	4.01057e-06	1.12384e-06	9.0226e-07	1.19696e-06	8.89637e-06	3.5911e-06	7.82857e-07	2.57155e-06
GCA_900545175_1	2.51118e-06	2.55196e-06	2.23101e-06	1.35602e-05	1.3425e-07	4.45731e-06	4.54329e-06	6.13826e-07	1.84098e-06	3.23646e-06	4.1797e-06	1.02074e-05	6.85281e-06	8.15255e-06	9.26348e-06	2.76413e-05	5.51174e-06	5.10326e-06	1.78864e-05	8.43572e-06	1.11637e-05	9.29157e-06	2.03513e-05	4.22271e-06	1.05232e-05	0.000268036	4.40085e-08	1.20766e-06	1.4985e-05	1.92791e-05	1.18587e-05	3.04275e-06	4.65207e-05	3.72751e-06	5.60257e-06	0	6.91171e-07	2.74287e-06	1.96007e-06	4.53733e-06	6.17271e-06	4.21741e-06	0.000377008	9.26144e-06	5.07284e-06	4.13979e-06	2.34072e-06	7.19562e-06	7.84403e-06
GCA_900545585_1	1.09265e-06	3.47308e-06	5.27767e-05	4.61774e-05	1.20825e-06	2.61728e-05	3.89826e-05	2.90731e-05	1.43558e-05	1.32906e-05	5.85738e-05	0.000239407	8.41447e-05	0.000149797	0.000322268	0.00227438	0.000294973	0.000553153	8.16855e-05	0.000571855	3.79314e-05	9.80869e-05	0.000276621	0.000186161	0.000115961	8.99635e-07	5.94115e-07	3.07116e-05	8.99638e-05	0.000133455	3.11063e-05	0.000107433	5.6747e-06	3.7495e-05	0.000252752	5.22208e-07	1.13689e-05	4.67561e-06	2.20356e-06	0.00016431	0.000138467	5.09997e-05	0.000499608	0.000145556	2.33693e-06	0.00011698	6.26393e-05	1.30837e-05	2.94272e-05
GCA_900545925_1	1.13099e-06	6.16094e-06	9.62011e-06	0.000207233	9.73315e-07	1.18397e-05	0.000172084	2.74362e-05	2.07013e-05	1.08967e-05	2.64097e-05	0.000266315	4.6242e-05	9.12085e-05	0.000548001	0.0022887	0.00166432	0.00128311	0.000250757	0.000886955	1.49959e-05	0.00840095	0.00199993	8.69038e-05	0.00034241	8.60762e-06	8.36161e-07	7.07873e-06	0.000256097	0.000138789	7.23126e-05	0.000370757	0.000108091	1.09296e-05	0.00114713	4.47607e-07	1.85198e-06	2.56927e-06	2.02094e-06	3.90382e-05	0.000131166	1.5054e-05	6.19473e-05	0.000127829	1.79544e-06	3.60977e-05	8.18452e-05	7.32055e-06	3.29611e-05
GCA_900546075_1	1.91693e-07	4.98312e-07	6.85366e-06	1.6414e-05	9.73315e-07	3.98372e-06	2.4904e-05	8.18435e-06	2.80456e-05	6.41547e-07	4.29549e-06	7.54906e-05	9.59393e-06	2.59977e-05	0.00114093	0.000797224	5.99048e-05	0.000233366	1.58703e-05	5.46048e-05	4.65824e-06	3.35974e-05	3.59113e-05	3.49248e-05	0.000413336	2.11026e-07	7.59146e-07	3.15849e-06	1.65367e-05	0.00019343	2.63799e-05	4.04822e-05	1.06401e-06	5.99261e-06	0.000288292	1.06573e-07	1.06334e-07	4.51358e-07	2.55661e-07	1.21444e-05	3.11731e-05	5.04481e-06	3.36243e-05	2.92837e-05	4.55986e-07	9.20999e-06	1.41043e-05	2.58176e-07	8.41009e-07
GCA_900546265_1	2.05112e-06	4.2734e-06	1.19939e-05	8.43107e-05	4.76253e-05	3.26916e-05	0.000130615	1.75406e-05	2.79673e-05	4.28975e-06	0.000154927	0.000641282	7.93767e-05	0.000230832	0.000230158	0.000177305	0.000341153	0.0017801	1.69429e-05	0.000246898	6.36091e-05	0.000121789	0.00302081	0.000129213	9.80408e-05	6.33077e-07	2.53049e-07	1.07203e-05	8.67882e-06	0.000184726	2.40961e-05	0.000180732	7.49534e-06	3.53399e-05	0.00125676	4.04978e-07	3.18825e-05	1.33324e-05	1.4244e-06	6.78765e-05	0.000436068	0.000553527	5.90412e-05	0.000134636	7.83726e-07	9.13472e-05	8.36957e-05	9.82735e-06	2.28043e-06
GCA_900546295_1	5.17572e-07	9.51322e-07	3.39113e-06	8.59961e-06	1.3425e-07	1.47648e-06	6.97386e-06	1.74848e-06	1.33178e-06	1.57035e-06	7.35211e-06	1.55366e-05	2.44095e-05	9.82734e-06	0.00019468	0.00208553	0.000109038	0.000651613	0.0002084	0.000354653	3.01753e-06	3.11106e-05	0.000452744	0.000134193	4.5276e-05	1.99919e-07	2.42047e-07	1.65356e-06	8.14655e-06	0.00090598	7.42545e-06	3.19391e-05	1.56054e-06	2.71592e-06	1.81942e-05	7.24697e-07	1.17853e-06	6.71251e-07	1.46092e-07	5.6258e-06	2.95525e-05	5.04481e-06	0.000247528	2.46795e-06	6.98228e-07	7.17146e-06	4.2413e-06	2.69836e-06	1.44751e-06
GCA_900546495_1	0.000157323	1.40735e-05	1.73305e-05	0.000273636	6.58666e-05	8.74887e-05	0.000154752	6.47494e-05	2.45791e-05	0.000311332	5.75896e-05	0.000231507	0.000120021	0.000179183	0.000708355	0.000706985	0.000104936	0.000186758	0.000413721	9.88639e-05	0.000159516	0.000189015	0.000134548	0.00156394	6.3975e-05	2.40791e-05	5.61108e-07	7.31654e-05	0.000242691	0.000300715	0.000106765	0.000239899	0.000348037	9.47932e-05	3.75344e-05	4.68921e-07	0.000171853	0.000113765	3.87266e-05	0.000344287	0.00017574	6.61226e-05	0.000482819	0.000229294	3.89155e-05	0.00010384	0.000141964	4.2674e-05	0.00385799
GCA_900546535_1	0.000152569	0.0165297	8.4225e-05	4.94143e-05	5.46902e-05	1.1199e-05	6.71211e-06	1.01188e-05	0.0244025	1.33289e-05	2.46614e-06	6.73498e-06	8.78317e-07	2.8635e-05	0.00226188	0.00180586	0.0011152	0.000370652	0.0114592	1.56095e-05	4.87624e-06	4.23063e-05	4.89904e-06	1.00902e-05	1.07637e-05	2.32128e-06	6.02916e-06	5.4809e-06	1.73216e-06	0.0128039	6.38735e-05	3.59864e-06	1.86792e-06	1.58447e-05	2.32026e-06	1.10836e-06	1.1874e-06	1.80543e-06	1.33918e-06	1.09214e-05	1.12165e-05	1.79958e-05	4.01857e-06	1.37993e-06	1.53895e-06	1.26598e-05	9.84303e-06	1.1493e-06	5.32909e-06
GCA_900546685_1	1.32268e-06	6.04014e-08	0.000169771	0.000245788	3.18845e-07	8.91462e-07	2.76711e-06	0.000115102	1.29261e-06	9.28807e-07	0.000184497	0.000277215	0.000270763	0.000629007	0.000181835	8.20854e-05	0.000420066	0.000368166	2.66161e-06	0.000175331	0.000153194	0.0002305	0.00033131	0.000875979	0.000251812	1.48829e-06	7.70148e-07	2.25553e-05	1.90988e-05	0.00021386	6.85144e-05	0.000172852	5.09541e-06	1.69332e-06	0.000286877	1.50268e-06	9.48144e-07	2.07162e-06	1.21378e-05	0.000338588	0.00034061	4.94139e-06	6.71124e-05	7.3773e-06	1.7413e-05	0.00109687	2.50077e-06	1.49076e-06	8.4667e-06
GCA_900546885_1	3.68051e-06	6.19114e-07	1.03162e-05	1.04191e-05	1.87783e-05	9.70858e-06	6.30078e-06	3.36674e-06	8.98948e-06	0.000159908	0.00773891	0.000328997	0.000143996	0.000556982	0.000118196	0.000271665	0.000439286	0.000138176	0.000200475	0.000341249	0.000245418	0.000345266	0.000840955	0.000541498	5.69214e-05	7.04936e-05	3.26543e-05	0.000317447	0.000109369	0.000225679	0.000109452	0.000323829	0.000116639	8.28079e-05	0.0034584	3.12366e-05	0.00017071	0.000246754	9.76504e-05	0.00422178	0.000387806	0.000377476	0.000170131	0.000252898	0.000413508	0.00014482	7.60334e-05	0.000116429	0.000221169
GCA_900547185_1	2.16038e-05	4.90761e-06	1.43498e-05	4.68669e-05	9.74993e-06	4.35563e-05	0.000401717	2.31208e-05	0.000546772	1.04371e-05	5.79949e-05	7.94665e-05	0.000874003	0.000178336	5.71392e-05	4.48161e-05	0.000400491	0.000341971	2.77482e-05	0.000252571	0.000203976	5.97033e-05	0.000137047	0.00095418	2.93825e-05	1.14398e-06	4.18081e-07	3.59882e-05	0.000750583	0.000367721	0.000434694	0.000990835	3.35871e-05	3.63515e-05	0.000437425	7.215e-06	5.25467e-06	3.12479e-06	3.53056e-07	0.000274099	4.27082e-05	0.000331303	0.000454008	0.000551241	3.2774e-06	0.00134279	2.64181e-05	0.000106885	6.61486e-06
GCA_900547385_1	3.45048e-07	1.28353e-06	5.92556e-06	5.34363e-06	3.52407e-07	2.25651e-06	1.00588e-05	7.84954e-06	1.81161e-05	4.11739e-07	5.68486e-06	1.34909e-05	1.4748e-05	8.08518e-06	2.90818e-05	0.00252811	4.16294e-05	0.000335229	4.22381e-05	6.09259e-05	1.85871e-06	1.35264e-05	5.58581e-05	1.94221e-05	1.05804e-05	6.66396e-08	4.40085e-08	9.25251e-06	6.56776e-06	1.85586e-05	2.23496e-06	8.66989e-06	2.71913e-06	4.33227e-06	1.98778e-05	3.19719e-08	1.94946e-07	7.7541e-07	3.04359e-07	5.65026e-06	2.84236e-05	5.14823e-06	1.1613e-05	2.19727e-05	1.42496e-07	4.76703e-06	2.18067e-06	1.49909e-07	1.52029e-05
GCA_900547745_1	3.83387e-07	4.96802e-06	1.15655e-05	2.22364e-05	4.36314e-07	7.29885e-06	1.87528e-05	1.19417e-05	2.55192e-05	1.36927e-06	2.7417e-05	0.000100658	3.85688e-05	6.42194e-05	0.000166596	0.000862185	0.00015925	0.000790767	0.000118422	0.000415897	1.24487e-05	4.58232e-05	0.000181471	7.64637e-05	2.72412e-05	2.22132e-08	1.43028e-07	4.19893e-06	2.60996e-05	8.08585e-05	1.15046e-05	8.09255e-05	1.86438e-05	2.21012e-06	8.35858e-05	1.27888e-07	7.97505e-07	2.5577e-06	1.33918e-07	2.39953e-05	8.27944e-05	1.641e-05	9.01341e-05	5.92175e-05	8.54974e-07	1.62978e-05	1.19937e-05	3.03982e-06	1.39899e-06
GCA_900548125_1	1.15016e-07	1.81204e-07	1.28506e-06	1.21046e-05	2.68501e-07	6.4631e-06	2.93538e-06	3.90617e-07	7.55978e-06	1.34725e-05	1.77724e-05	0.000173389	8.30058e-06	8.39029e-05	0.000674082	0.000224212	0.000242651	0.00327041	0.000547526	0.000806589	7.80313e-05	7.16481e-05	8.12253e-05	1.41729e-05	0.000142034	5.44224e-06	2.39846e-06	9.52377e-05	7.59713e-05	0.000268595	1.16389e-05	6.00943e-05	1.06637e-05	7.32308e-06	4.00951e-05	2.50447e-06	7.70921e-06	0.000187464	6.05065e-06	6.95276e-05	0.000237367	8.21649e-06	2.7097e-05	2.38037e-05	0.000365872	9.65951e-06	8.20252e-06	8.9279e-06	1.76531e-05
GCA_900548245_1	1.89968e-05	2.85548e-05	2.1025e-05	6.32234e-05	2.70179e-06	0.000505529	8.37612e-05	1.2816e-05	2.27577e-05	0.000235869	0.000123944	0.000803834	0.000204146	0.000549243	0.00118581	0.000333898	0.000113786	0.00423378	0.000348939	0.000150285	0.000399806	0.00037905	0.000324955	0.000913201	0.000446405	0.000349025	2.54149e-06	1.2188e-05	0.000533684	0.00262261	0.000343061	0.0252671	0.000555459	0.000341249	3.44077e-05	1.38545e-06	0.000102134	0.000251707	0.000215839	0.000550558	0.000534595	0.000436152	0.00385803	0.000604965	0.00011934	0.000193859	0.000166971	0.000114988	0.000621821
GCA_900548305_1	1.89776e-06	3.06537e-05	1.08873e-06	2.96869e-06	9.73315e-06	4.79161e-06	0.000163596	1.35786e-06	2.98083e-05	0.000189955	2.50435e-05	2.908e-05	1.13795e-05	1.7335e-05	1.75886e-05	9.40573e-06	1.87872e-05	1.0991e-05	4.92596e-06	7.41252e-06	2.51155e-05	4.70613e-05	4.75522e-05	3.62196e-05	1.26301e-05	0.000741832	1.10021e-07	3.73445e-06	2.79761e-05	6.92608e-06	1.25304e-05	3.72737e-05	2.30298e-05	7.58367e-05	2.96681e-05	3.75137e-06	2.63354e-05	2.67343e-05	3.16533e-07	9.88184e-06	3.51972e-05	5.20569e-06	1.95707e-05	1.93853e-05	3.41989e-07	1.15726e-05	6.10188e-07	0.00055637	1.51948e-05
GCA_900548505_1	3.623e-06	5.66263e-06	6.5199e-05	1.492e-05	1.86272e-06	8.07888e-07	1.3929e-05	4.613e-06	0.000570137	3.20774e-06	2.73591e-05	0.000367151	4.98518e-05	3.15322e-05	3.98003e-05	8.78541e-05	0.000152573	6.1812e-05	2.32096e-05	3.92454e-05	1.19669e-05	0.000734138	2.08996e-05	0.00152329	0.000152558	5.44224e-07	1.36426e-06	1.26897e-05	1.67893e-05	1.66877e-05	8.24371e-06	7.05684e-05	3.68856e-06	8.07078e-06	0.000216491	9.91129e-07	4.6078e-07	1.49295e-06	1.82615e-07	2.86916e-05	3.95126e-05	2.27304e-05	0.000620086	6.46974e-05	6.4123e-07	4.48268e-05	7.68236e-06	2.70002e-05	4.90049e-06
GCA_900548595_1	0.00167793	2.11405e-07	1.24936e-06	0.000129396	3.30759e-05	1.5322e-07	0.000180199	9.66126e-05	1.23385e-06	7.68899e-06	1.27128e-05	0.000459951	0.000273417	0.00026606	0.000125539	1.63464e-05	3.27791e-05	7.86202e-06	3.47598e-06	3.77447e-06	1.33093e-05	4.43249e-06	4.0298e-05	0.000153744	5.57649e-06	6.8972e-06	3.52068e-07	1.64241e-05	0.000127909	2.73092e-06	2.10062e-06	0.000221945	3.6058e-06	0.00157698	8.85659e-06	3.9432e-07	1.25829e-06	4.79713e-05	5.57463e-05	8.8056e-06	4.35185e-06	3.79223e-06	0.000168667	2.79303e-05	2.63474e-05	0.00159319	0.000730815	2.68753e-05	2.72681e-05
GCA_900548825_1	5.48243e-06	6.65925e-06	2.15426e-05	0.000122444	1.29216e-06	7.49664e-05	9.2829e-05	9.52361e-06	2.93578e-05	6.03342e-05	4.93344e-05	0.000467295	3.78835e-05	0.00011659	0.000888304	0.000311652	0.000406042	0.00105969	0.00101512	0.000293363	5.90082e-05	0.000242892	0.000541843	0.00131045	0.000134672	0.0001913	1.39727e-06	4.70057e-06	0.000932053	0.000272534	0.000182156	0.000215275	7.81099e-05	0.00217357	7.3371e-05	7.56669e-07	5.71545e-05	5.23344e-05	3.37229e-06	0.000141318	0.000490703	6.45023e-05	0.00122317	0.000224596	8.67798e-06	4.28928e-05	0.000175994	0.00029582	0.0002166
GCA_900549125_1	6.4984e-06	3.56972e-05	9.15606e-06	3.5969e-05	1.19147e-06	1.97236e-05	1.77058e-05	1.41366e-05	5.12146e-05	5.53454e-06	5.78675e-05	0.00147077	8.66735e-06	0.00025348	0.000517412	0.000612473	0.000192163	0.000658223	0.000391485	0.000601926	2.09047e-05	0.00056792	0.000834671	0.000235153	2.82947e-05	4.00615e-05	5.204e-06	0.0001653	0.000325302	0.000173826	1.02833e-05	0.0002773	2.34436e-05	1.52289e-05	5.43704e-05	1.12435e-05	2.15149e-05	5.74382e-05	5.68907e-05	4.48841e-05	0.00071049	1.12733e-05	4.09577e-05	1.6108e-05	4.80353e-05	2.38561e-05	0.000119357	1.83472e-05	1.48147e-05
GCA_900549405_1	1.01597e-06	3.08047e-06	3.80699e-05	5.90864e-05	9.0619e-07	9.82001e-06	1.29381e-05	1.11419e-05	2.92795e-05	4.12697e-06	5.07238e-05	8.46069e-05	7.64812e-05	4.19082e-05	0.000518566	0.000717391	0.000120432	0.000273311	0.000296203	0.000372365	3.42943e-05	0.000105079	0.000129344	0.000118306	2.04395e-05	3.66518e-07	3.19061e-07	1.04416e-05	5.80994e-06	0.000974009	7.35217e-06	0.000181804	4.07869e-06	8.88445e-06	0.000348944	2.34461e-07	3.48244e-06	1.42351e-06	6.08717e-08	7.99231e-05	0.000109397	2.75224e-05	0.000811865	3.0584e-05	1.38221e-06	1.64024e-05	4.26131e-05	7.77027e-06	2.12678e-06
GCA_900549635_1	6.32588e-07	4.99822e-06	2.23101e-06	6.91417e-05	1.24182e-06	2.61449e-05	8.26394e-06	1.66849e-05	5.48378e-06	5.07493e-06	5.3792e-05	2.35934e-05	3.06639e-05	2.34951e-05	0.00120872	0.00169215	0.0002965	0.0023524	0.000722984	0.000263247	5.87443e-06	0.000639204	0.000238148	4.53999e-05	4.83448e-05	2.44345e-07	3.6307e-07	1.02186e-06	0.000134639	0.000296741	1.40448e-05	0.000193429	1.10775e-05	9.12636e-06	7.51678e-05	4.04978e-07	3.89891e-06	8.91143e-07	2.55661e-07	1.50062e-05	1.88732e-05	4.63916e-05	3.74499e-05	7.38261e-05	7.26728e-07	1.72805e-05	7.23222e-06	2.22365e-06	3.61957e-05
GCA_900549795_1	7.09265e-06	1.01172e-05	5.42403e-05	4.83034e-05	3.84292e-06	2.22169e-05	1.38916e-05	2.7492e-05	4.8884e-05	6.42505e-06	0.00017571	0.000112344	7.59986e-05	0.000170501	0.000633163	8.1752e-05	0.000456916	7.90873e-05	3.69646e-05	0.00015647	9.55972e-05	0.000114652	0.000142153	0.000144809	0.000173043	2.99878e-07	3.52068e-07	9.19677e-06	9.38161e-05	9.55009e-05	6.99311e-05	0.000108408	1.40685e-05	1.55918e-05	0.000371453	3.41034e-07	8.15227e-07	7.49949e-06	1.55832e-06	0.000122532	0.000151832	6.87312e-05	4.30578e-05	0.000309475	1.6387e-06	4.65204e-05	0.000208694	1.99129e-05	5.52316e-06
GCA_900549885_1	1.41661e-05	4.16468e-05	5.36691e-05	0.000386121	1.91475e-05	1.84561e-05	1.77058e-05	2.38462e-05	3.20214e-05	1.07148e-05	0.000169261	0.000249792	0.000144671	0.000804186	5.13624e-05	5.95258e-05	0.000931343	6.31077e-05	3.67858e-05	0.000143225	0.000147721	6.89532e-05	0.000388894	0.00105378	7.74181e-05	4.10944e-07	6.71129e-07	6.13118e-06	4.76162e-05	4.56587e-05	3.81165e-05	0.00014966	5.79411e-05	8.39515e-05	0.000381597	2.36592e-06	2.09123e-06	1.23024e-05	3.89579e-07	0.000239879	0.000110708	6.58353e-05	0.00110698	0.000102208	6.26981e-07	0.000358301	0.000101571	6.68926e-05	1.59307e-06
GCA_900550165_1	6.70927e-07	3.17107e-07	1.94544e-06	9.76793e-06	4.02751e-06	2.92511e-06	1.21528e-06	0.000136455	2.50687e-06	6.70273e-07	4.14497e-06	0.000126664	0.000176754	0.000184178	0.000489295	0.00227549	0.000229485	0.00101905	0.000504136	0.000372217	1.00623e-05	5.69668e-05	0.000661569	0.000337023	0.000114198	2.55452e-07	4.40085e-07	1.26339e-06	2.38171e-06	0.000336693	2.19954e-05	0.000137831	1.30045e-06	1.35246e-06	0.000136895	1.91831e-07	1.5064e-07	6.59677e-07	4.13928e-07	9.05754e-05	7.08678e-05	4.69432e-05	0.000706429	5.37376e-06	3.84738e-07	4.21506e-05	1.39743e-05	3.91428e-07	8.86294e-06
GCA_900550175_1	7.66773e-08	3.62408e-07	2.49873e-07	3.25598e-07	3.35626e-07	1.18815e-05	1.26016e-05	4.27818e-07	2.03683e-06	0.000110681	4.9786e-07	1.25888e-07	2.21992e-07	3.75383e-07	2.42779e-06	5.15244e-06	3.77948e-07	6.16974e-07	7.44853e-07	5.68445e-08	5.39254e-07	6.86723e-07	1.25847e-07	1.38813e-06	1.19087e-06	0.000923859	0.000229625	5.78003e-05	3.8757e-05	7.90224e-07	6.90029e-06	5.91971e-06	0.000121557	1.52839e-06	6.50803e-07	0.00119793	6.1142e-07	8.11287e-06	7.2206e-05	5.0143e-07	2.09399e-07	2.05125e-05	3.51909e-07	7.20481e-06	8.09232e-05	4.10843e-06	4.68144e-06	2.18201e-06	6.21214e-05
GCA_900550845_1	0.000148773	0.000121709	5.01709e-05	0.00339233	0.000133025	0.000418764	0.00193696	0.000203828	0.000325012	0.00057699	0.000344079	0.00101367	0.0011689	0.000496035	0.00104563	0.000537935	0.000570749	0.00126437	0.000862887	0.000801757	0.000445413	0.00155483	0.00101165	0.000949071	0.000806266	0.000206783	3.04759e-06	4.75817e-05	0.00103984	0.000758928	0.00139834	0.00082047	0.00134241	0.000573454	0.000403229	1.20428e-06	8.41899e-05	0.000962539	4.43024e-05	0.00147442	0.00112226	0.00108011	0.00103946	0.00101312	5.12984e-05	0.000227145	0.000969528	0.000380044	0.00102451
GCA_900551275_1	6.59617e-05	0.0705482	0.000385982	0.000291219	0.000187934	0.000104552	0.000152079	1.8824e-05	0.0977339	0.000216795	4.71925e-05	0.00028994	0.000132105	9.81964e-05	0.00936648	0.00805457	0.00588788	0.00074965	0.0627879	9.09966e-05	0.000125337	0.000201657	0.000171017	0.000115215	4.58486e-05	0.000156203	1.06941e-05	3.43903e-05	0.000305816	0.065934	0.000302111	0.000132106	0.000253234	0.000148496	2.27357e-05	5.93612e-06	9.40169e-06	4.13629e-05	2.13294e-05	0.000101803	0.000342995	0.000347104	0.000211009	0.000155547	1.40501e-05	2.49328e-05	2.51877e-05	4.09834e-05	0.00019272
GCA_900551355_1	4.60064e-07	3.02007e-07	2.90924e-06	3.56242e-06	3.18845e-07	1.5322e-06	2.16882e-06	1.26485e-06	2.03683e-06	7.56451e-07	1.19139e-05	2.78946e-05	1.25667e-05	1.80761e-05	8.02721e-05	0.000649945	5.47237e-05	0.000131371	1.53738e-05	0.00100336	5.38107e-06	1.67935e-05	3.93991e-05	4.19121e-05	1.04201e-05	1.22173e-07	1.65032e-07	6.2055e-06	2.59823e-06	2.11733e-05	2.94331e-06	1.66181e-05	8.63028e-07	1.60536e-06	4.61505e-05	9.59157e-08	3.8103e-07	6.36531e-07	2.19138e-07	5.49127e-06	2.48183e-05	4.19443e-06	2.65748e-05	1.85759e-05	1.28246e-07	6.46058e-06	2.57079e-06	2.14036e-06	3.04057e-06
GCA_900551615_1	1.91693e-08	1.42547e-05	7.13923e-08	6.1289e-07	5.03439e-08	2.22866e-07	2.69793e-05	2.2321e-07	1.98787e-05	1.53205e-07	4.51547e-07	4.51412e-05	5.60386e-05	9.42308e-06	0.000288253	4.47656e-05	3.15193e-05	8.90206e-07	7.96496e-05	0.000242169	5.62201e-07	6.78503e-05	7.91038e-07	1.3648e-06	2.51114e-05	7.33036e-07	1.21023e-07	9.32683e-06	0.000104254	1.58161e-05	1.5144e-06	8.78692e-06	1.48961e-06	3.07877e-07	0.000158103	6.7141e-07	7.08893e-08	1.49295e-06	8.43682e-06	1.1007e-07	8.65818e-06	1.96506e-06	3.69504e-05	1.00841e-06	9.13397e-06	2.19534e-07	1.10034e-07	7.49544e-08	3.15378e-07
GCA_900551715_1	5.29074e-06	1.33638e-05	7.31771e-07	1.18173e-05	1.02366e-06	1.51827e-05	2.40252e-05	3.03193e-06	3.68197e-06	5.4656e-05	6.09241e-05	0.000208994	4.06729e-05	0.000173283	9.90573e-05	0.000350932	2.40312e-05	0.00017404	0.000333257	2.32494e-05	0.000173548	9.92939e-05	0.000108561	0.000193346	2.31648e-05	8.73535e-05	4.29083e-07	3.49663e-05	7.17582e-05	0.000464651	2.85049e-05	0.000338389	0.000120398	0.000106361	8.37556e-06	1.49202e-07	4.53957e-05	7.70202e-05	3.96884e-06	0.000382787	4.46019e-05	0.000118812	0.000131534	8.09646e-05	7.73751e-06	7.82483e-05	3.77916e-05	6.57433e-05	6.54855e-05
GCA_900552015_1	1.07348e-06	8.15419e-07	3.05202e-06	2.08383e-05	1.40963e-06	7.1317e-06	2.8419e-06	6.26847e-06	3.72114e-06	1.71398e-06	8.23205e-06	6.4339e-05	3.95822e-05	6.24195e-05	0.00100892	0.0016832	0.00043568	0.00188766	0.000934026	0.00179779	2.079e-05	0.00013671	0.00158906	0.000572212	0.000196379	3.99838e-07	7.81151e-07	4.53336e-06	2.26714e-05	0.000583999	4.7264e-06	5.47793e-05	5.80475e-06	4.02439e-06	2.96116e-05	4.47607e-07	1.85198e-06	1.28463e-06	4.26102e-07	2.70528e-05	8.20024e-05	8.22798e-06	0.00132958	1.14375e-05	9.26221e-07	3.76031e-05	5.68175e-06	1.15763e-06	1.49603e-06
GCA_900552275_1	6.12268e-05	0.000134771	0.00046546	0.000617755	0.000185651	0.00162263	0.000143665	0.000794589	0.000141814	0.000595863	0.000117807	0.00089741	0.0038565	0.000240707	0.00101937	0.000175334	0.0012165	0.000482791	0.000289907	0.00124013	0.00159065	0.000906235	0.000498498	0.000580704	0.000559801	0.00076158	1.5403e-06	0.000181353	0.00196922	0.000360412	0.000346321	0.00079052	0.000594319	0.000614841	0.000289905	1.37479e-06	0.00101337	0.000605885	1.80424e-05	0.000780751	0.00127482	0.000672005	0.00178151	0.000623581	4.92037e-05	0.000401947	0.00039136	0.00032835	0.000484842
GCA_900552445_1	4.02556e-07	4.83211e-07	1.55278e-06	6.70348e-06	2.16479e-06	9.0957e-06	3.39532e-05	8.37036e-07	1.21427e-06	0.000208474	2.4893e-06	2.92479e-05	2.54809e-06	3.98484e-06	5.37213e-06	2.75807e-06	5.26765e-06	5.13851e-06	1.11231e-06	2.79675e-06	6.83821e-06	1.18616e-06	9.61831e-07	4.66598e-06	9.27506e-07	0.000155515	0.000164075	1.09061e-05	2.55132e-05	1.89421e-06	4.95844e-06	1.25416e-05	0.000134892	7.54299e-06	2.61736e-06	0.000696679	7.53199e-07	1.59133e-05	7.6954e-05	5.58911e-06	7.52925e-06	1.849e-05	3.06501e-06	6.64753e-06	7.1205e-05	1.82318e-05	5.15158e-06	1.74061e-06	6.34072e-05
GCA_900552625_1	1.32268e-06	5.88914e-07	3.6767e-06	3.45325e-05	9.56534e-07	6.82526e-07	2.35578e-06	3.53415e-07	1.95849e-07	8.80931e-07	4.39969e-06	1.93028e-06	4.63288e-07	9.0477e-06	4.52757e-05	0.00076246	2.45194e-05	0.00105001	1.41025e-06	0.000280687	2.28323e-06	4.33364e-05	3.52372e-06	4.47934e-06	0.000205735	9.99595e-08	6.60127e-08	3.53007e-07	1.14575e-06	1.27365e-05	2.77233e-06	2.92572e-06	2.60091e-07	5.91564e-06	1.63267e-05	1.897e-06	1.77223e-07	4.16638e-07	1.94789e-07	1.32084e-06	5.85406e-06	5.86071e-07	7.42187e-05	6.63427e-08	1.70995e-07	1.12903e-06	2.84087e-06	1.49909e-07	2.60389e-06
GCA_900552665_1	3.32205e-05	0.000240941	6.25575e-05	0.000588968	1.0975e-05	0.00163242	0.00106928	0.000121184	0.00190585	0.00104521	0.000302757	0.000913986	0.00138779	0.00104853	0.00192102	0.00189047	0.000777298	0.00144457	0.00140174	0.00165526	0.00377664	0.00162955	0.00118926	0.00071022	0.00210835	0.00382638	4.18081e-06	2.39116e-05	0.00139237	0.002512	0.0015693	0.000621648	0.0297991	0.00183113	0.000182013	4.14569e-06	0.00011928	0.00323977	0.000615437	0.00152608	0.00391495	0.00134162	0.00224787	0.00174283	0.000246019	0.000898335	0.00110647	0.00744188	0.00326268
GCA_900553545_1	3.45048e-07	6.79516e-07	1.03519e-06	1.25451e-05	5.37001e-07	1.05861e-06	2.59884e-06	8.92838e-07	5.67963e-07	2.50874e-06	2.99874e-06	1.06375e-05	4.10203e-06	6.93978e-06	0.000740209	0.000780493	0.000368043	0.000503795	0.000590539	0.000596583	4.61235e-06	6.60295e-05	8.723e-05	5.76248e-06	1.06033e-05	1.77706e-07	7.70148e-08	9.28967e-07	4.18604e-06	1.24693e-05	1.91743e-06	7.91896e-06	5.91115e-07	9.45622e-07	7.17157e-05	5.87218e-06	6.20281e-08	5.20798e-07	1.58266e-07	7.53368e-06	9.07698e-06	5.0563e-06	1.98885e-05	1.06148e-06	5.12984e-07	4.01434e-06	8.70268e-06	1.19094e-06	2.52303e-05
GCA_900553635_1	9.41214e-06	2.73316e-06	2.28455e-06	6.6556e-05	2.34938e-07	1.79825e-05	1.09189e-05	5.05942e-06	1.1751e-05	2.45224e-05	1.31875e-05	5.93665e-05	1.98828e-05	8.31907e-05	0.000166614	0.000715037	2.85823e-05	0.00020569	8.12088e-05	4.5305e-05	0.000119347	9.50175e-05	5.59839e-05	6.96164e-05	9.28651e-05	1.42165e-06	4.18081e-07	2.26668e-06	9.20208e-05	0.000467313	5.45551e-05	4.9708e-05	8.54752e-06	6.74911e-05	3.6827e-05	4.26292e-08	2.18516e-05	3.39097e-06	4.50451e-07	3.45131e-05	4.91086e-05	2.71202e-05	0.000144998	7.24462e-06	2.27993e-06	1.59633e-05	5.79778e-05	1.52324e-05	0.000190966
GCA_900554965_1	0.000338281	0.000338233	0.000133914	0.000485945	0.000109699	0.000481515	0.00059147	0.000527556	0.000169645	0.00110568	0.00159077	0.00277448	0.00440375	0.00140571	0.00492621	0.00090588	0.00198366	0.00248796	0.00732	0.00330968	0.00142731	0.00166232	0.0022972	0.00235927	0.00159959	0.00188118	5.42405e-06	2.17007e-05	0.00425031	0.00206583	0.00141706	0.000688062	0.00393221	0.00272664	0.000241024	3.35705e-06	0.000206704	0.000697626	0.000358145	0.00647901	0.00179098	0.0033241	0.00172492	0.00171241	0.000394656	0.00069446	0.00211413	0.00218204	0.00394077
GCA_900555475_1	0.000229821	0.000128142	0.000996725	0.000512204	0.000373619	0.00057477	0.00100956	0.00105985	0.00113111	0.000476373	0.000968209	0.000448044	0.000371509	0.00123105	0.00105679	0.000254308	0.0015895	0.000541783	0.000164533	0.00199047	0.000839011	0.00222222	0.000816118	0.00111542	0.000496548	0.000982357	1.5733e-06	0.000145866	0.000412028	0.000367559	0.000846122	0.000634141	0.000329393	0.000765371	0.000622918	1.57728e-06	0.000244745	0.00012895	4.97322e-05	0.000858632	0.000534531	0.00158129	0.000799537	0.00254351	0.000327341	0.000820086	0.00273234	0.000150733	0.000439985
GCA_900555925_1	0	4.68111e-07	0.000191706	5.78032e-05	1.67813e-08	1.61578e-06	0.000394444	2.79012e-07	4.30869e-06	1.81931e-07	0.000106125	4.82569e-07	3.95725e-07	7.85995e-05	2.75924e-05	0.000128821	0.00043416	0.000168002	5.59831e-05	5.12055e-05	2.52417e-07	3.16309e-06	9.71449e-05	1.36363e-05	1.80234e-05	1.44386e-07	1.76034e-07	2.93553e-06	1.12771e-06	1.23182e-06	1.95407e-07	0.000275701	5.4619e-06	2.19912e-07	2.14199e-05	9.91129e-07	1.15195e-07	1.96746e-07	4.13928e-07	5.1366e-07	4.73423e-07	1.58584e-06	0.000149618	2.64044e-06	1.51045e-06	1.40293e-05	7.00215e-08	4.99696e-08	4.7792e-06
GCA_900556695_1	1.09265e-06	3.56368e-06	3.03417e-07	9.38488e-07	2.18157e-07	2.27044e-06	2.89799e-06	1.01746e-05	5.94011e-05	1.12031e-06	1.88724e-06	6.29752e-05	2.70638e-05	1.50057e-05	0.000198209	5.3161e-05	7.64321e-05	3.24352e-06	9.65329e-06	0.000742616	4.14193e-06	5.08591e-05	3.26573e-05	7.55888e-06	7.43723e-05	1.22173e-06	9.90191e-08	9.64267e-06	3.18554e-05	1.38754e-05	2.70638e-05	1.91147e-06	7.06973e-06	1.15564e-05	0.000114414	8.81359e-06	2.08858e-05	8.14759e-06	4.90626e-06	5.15861e-05	3.53247e-05	1.89381e-05	2.30898e-05	0.000164556	7.35277e-06	4.27569e-06	0.000193069	1.08267e-07	1.83728e-05
GCA_900556785_1	3.83387e-08	1.44963e-06	6.42531e-07	1.83867e-06	8.89409e-07	2.69667e-05	1.87902e-05	6.32427e-07	2.87898e-06	0.000198267	1.26202e-06	5.97966e-07	4.53636e-07	4.13884e-07	6.08669e-06	1.22345e-05	1.01574e-06	3.42861e-06	9.23617e-07	2.27378e-07	1.43419e-06	2.133e-06	2.51694e-07	3.89609e-06	2.38174e-06	0.00162728	0.00201656	9.72257e-05	6.75811e-05	1.60369e-06	1.42769e-05	1.01913e-05	0.000203604	3.70552e-06	1.51383e-06	0.000769116	1.20512e-06	7.4069e-06	0.000153299	9.9063e-07	9.28638e-07	3.71868e-05	5.22187e-07	2.86468e-05	0.000191229	2.72223e-05	1.2974e-05	4.16413e-06	0.000120895
GCA_900557055_1	0.00209833	0.000389695	9.32383e-05	0.0354473	0.000144873	0.00244819	0.0154195	0.000337958	0.00128003	0.000848394	0.000521409	0.00245603	0.00654953	0.000873565	0.00160114	0.00121772	0.00174499	0.00280908	0.00120103	0.000827462	0.00111055	0.00892991	0.00418273	0.00595672	0.00557414	0.000126937	1.45558e-05	0.000602175	0.00110567	0.00298333	0.00694074	0.000844178	0.00118558	0.000698287	0.00101886	5.96809e-06	0.000594983	0.000391929	8.94936e-05	0.0043715	0.00429456	0.00483017	0.00152341	0.000730353	0.000118271	0.000256207	0.00219206	0.000798706	0.000775232
GCA_900557155_1	2.22364e-06	2.73316e-06	4.46202e-06	0.00144883	1.42641e-06	1.15612e-06	1.57052e-06	0.000124681	2.05642e-06	1.74271e-06	2.13616e-05	2.06141e-05	7.88555e-06	0.000119978	0.000154569	0.000126225	3.78657e-05	2.77021e-05	3.02907e-06	4.03255e-05	1.20357e-05	2.57521e-05	0.000459566	8.92368e-06	0.000175322	1.11066e-07	2.31045e-07	1.66471e-05	1.74569e-05	4.39271e-06	1.09916e-06	1.73008e-05	2.68366e-06	6.02559e-06	5.4809e-05	9.59157e-08	1.15195e-07	2.31466e-07	6.69589e-07	2.25888e-05	0.000376808	6.6996e-06	7.71589e-05	1.01106e-05	1.28246e-07	1.64128e-05	3.54109e-06	1.29921e-06	3.07292e-07
GCF_000011065_1	0.0293006	0.000204217	0.0023021	0.000734261	0.0303018	0.00315374	0.00442149	0.00518568	0.00848676	0.0538131	0.00124515	0.000836722	0.000454621	0.000474658	0.00365009	0.00014348	0.000656779	0.0215907	0.00210479	0.00282391	0.0012387	0.00344376	0.000590834	0.00708028	0.0175756	7.50807e-06	1.24654e-05	0.000377309	0.000532927	0.00187511	0.00317719	0.00701372	1.2839e-05	0.00432093	0.00045651	6.28781e-06	0.00172262	7.73096e-06	5.36888e-06	0.000544296	0.000905904	0.0317392	0.000478937	0.000503952	8.92022e-06	0.00162838	0.00389145	5.77732e-05	0.000357825
GCF_000012825_1	0.305905	0.00423663	0.00153879	0.00658072	0.121437	0.118745	0.280608	0.120289	0.0482004	0.225118	0.0494551	0.0806251	0.0373161	0.000850147	0.0184587	0.00229659	0.0265281	0.0173702	0.00795571	0.0295496	0.111151	0.0634972	0.0520432	0.0105212	0.0507257	9.55501e-05	9.43542e-05	0.105632	0.0998943	0.0203738	0.124497	0.0596715	0.00023284	0.0849878	0.00243797	8.7262e-05	0.240661	8.50405e-05	7.44948e-05	0.0901142	0.0829747	0.0123648	0.0827108	0.0992533	0.000105019	0.0799	0.0888346	6.38362e-05	0.000548855
GCF_000012845_1	0.000202773	0.00172768	0.0344831	0.00485487	0.00724695	0.0181589	0.00291208	0.0103823	0.00797884	0.0149263	0.000210757	0.000248796	0.000126651	7.79834e-05	0.00899358	0.000625193	0.0346005	0.0364659	0.000666445	0.00773273	0.0617009	0.00103132	0.00190656	0.000110829	0.0106733	1.52049e-05	2.0871e-05	6.9561e-05	0.000129767	0.00202181	0.00409421	0.00878148	2.09964e-05	0.0165241	0.0196547	1.47177e-05	0.162077	1.53462e-05	1.20891e-05	0.000366594	0.0227225	0.000409043	0.0215547	0.0265749	2.19158e-05	0.0169263	0.000838818	1.0477e-05	8.57506e-05
GCF_000020605_1	0.00231391	0.0321511	0.00159838	0.00249138	1.39453e-05	0.00262653	0.0305147	5.065e-05	0.00059926	0.0347163	0.00275091	0.0482317	0.0206822	0.00994545	0.0092976	0.00410319	0.0187713	0.00179285	0.0182817	0.0058671	0.0109012	0.0378217	0.0229016	0.000710581	0.00255233	0.000534694	2.37096e-05	8.36256e-05	0.105189	0.0310365	0.0991881	0.000598398	0.000807593	0.00267602	0.000123143	2.90838e-05	5.52671e-05	0.000818636	8.08741e-05	0.000246276	0.0450053	0.0753947	0.0265165	0.0535478	0.000185658	0.00039098	0.000333673	0.000355176	0.00821469
GCF_000024945_1	4.60064e-07	8.5619e-06	1.8919e-06	6.55026e-06	1.72847e-06	6.45196e-05	7.34219e-05	7.81234e-07	6.3651e-06	0.000794494	1.86408e-06	3.34651e-06	9.07273e-07	8.95144e-07	3.29732e-06	6.46581e-06	1.56691e-06	3.31051e-05	5.68074e-06	1.67123e-06	2.04228e-06	1.78964e-06	7.10137e-07	1.77657e-05	1.36263e-06	0.000137255	0.0127478	1.5811e-05	6.20509e-05	2.47526e-06	1.50463e-05	2.8282e-06	8.46595e-05	3.27229e-05	3.11254e-06	0.0014633	5.08631e-06	1.41889e-05	9.55321e-05	1.9568e-06	2.66756e-06	0.000115479	1.35088e-06	0.000164158	0.000173018	0.000177426	9.48292e-05	6.70425e-06	0.000101552
GCF_000025985_1	0.0346728	4.17525e-05	0.0454335	0.000387136	0.0117569	9.55954e-05	0.0235782	0.00580125	0.000128869	0.022427	0.0170852	6.20101e-05	0.000639927	0.000163898	9.24627e-05	7.30939e-05	0.000155888	0.000187789	4.27645e-05	0.015592	0.000613098	0.00430889	8.76974e-05	0.00795821	0.00237727	3.42083e-06	4.6649e-06	0.000180405	0.00927845	0.00158226	0.00013604	0.00567877	3.65309e-05	0.00139326	0.000264849	4.5187e-06	0.00110342	1.10756e-05	0.000806842	0.00323117	6.27286e-05	0.000746827	0.0128477	0.000332775	5.60008e-06	0.000356106	0.000612728	2.98985e-06	0.044622
GCF_000026325_1	4.58147e-06	0.000150203	0.000304702	7.06739e-06	0.000203607	1.11433e-07	4.62743e-05	4.09776e-05	1.56679e-07	7.9638e-05	0.0106635	8.45125e-05	6.98793e-06	5.23611e-06	5.5314e-05	0.000323674	3.59051e-06	3.70185e-06	2.68544e-05	0.000255709	0.0011126	1.09876e-05	1.57578e-05	2.19884e-05	3.73636e-05	0.0100659	0.000181997	7.00441e-06	1.0438e-05	0.000205063	3.74936e-06	4.09601e-06	0.00319598	0.00969747	3.43794e-06	0.0469288	0.00367912	0.0291674	0.049283	5.18552e-06	8.98594e-06	6.99723e-05	5.26728e-06	0.000235981	0.0166026	0.000585268	0.00119985	6.27118e-06	0.00372726
GCF_000146185_1	5.22556e-05	0.000396384	1.28863e-05	0.000116698	2.85953e-05	0.000126978	0.00216214	1.7801e-05	0.000716476	0.000128989	2.43488e-05	0.00112364	0.000552211	7.41622e-05	0.00343494	0.000705177	0.000534426	0.000100144	0.00101034	0.00110619	8.56038e-05	0.00242012	0.000137209	0.00651103	0.000204704	0.00123146	4.22481e-06	8.66912e-05	0.00233975	0.00191061	0.00269812	0.00649355	0.000299683	0.000147121	0.000598782	3.36771e-06	4.41286e-06	2.09129e-05	0.00171983	7.36124e-05	0.00271809	0.000178591	0.00572386	0.000618526	0.000263474	6.51181e-05	5.03355e-05	5.66072e-05	0.000246302
GCF_000153885_1	9.8147e-06	0.000135133	2.07216e-05	0.00101226	6.39367e-06	0.00178685	0.000178292	4.37491e-05	4.40465e-05	9.39149e-05	9.94561e-05	0.000973719	0.00438292	0.000224181	0.0010304	0.000202693	0.00116523	0.00013361	0.00027778	0.00164349	0.000199249	0.000850413	0.000495127	0.000409906	0.000281767	0.000285984	1.62831e-06	9.67798e-05	0.00247943	0.000910977	0.000160502	0.000500142	0.000360013	0.000106108	4.73955e-05	2.11015e-06	1.94946e-05	8.57465e-05	3.18359e-05	0.000606596	0.00155591	0.000475878	0.00213107	0.000208993	5.5217e-05	6.29123e-05	0.000210545	8.95039e-05	0.000219398
GCF_000153905_1	5.67221e-05	0.000215165	1.57598e-05	0.000363156	1.87111e-05	0.000271966	0.000723524	0.000207529	4.33219e-05	0.000565883	0.00374016	0.0141152	0.000383294	0.00188591	0.00555608	0.00177263	0.000817746	0.000704003	0.000734683	0.000583736	0.000835982	0.00585699	0.0052037	0.0109078	0.00058434	0.000763424	1.69653e-05	6.36342e-05	0.00217689	0.00278343	0.0018123	0.0165389	0.000951376	0.000738322	8.92308e-05	8.95214e-06	0.000174707	0.000685578	3.19455e-05	0.018667	0.000719876	0.00764802	0.00415315	0.000364832	0.000121848	0.00391916	0.000895305	0.000366319	0.00115916
GCF_000153925_1	1.44345e-05	1.31071e-05	3.37864e-05	0.000141616	5.05117e-06	4.38906e-05	5.3566e-05	0.000123119	9.09328e-05	0.00416273	0.000903939	0.00155509	0.00034348	0.010634	0.000678826	8.33584e-05	0.00343193	5.43554e-05	0.000282289	7.4614e-05	0.0379408	0.000324872	0.00176953	0.000380359	0.000426389	0.000585574	4.75292e-06	7.34069e-05	0.000279373	0.00265369	0.00141986	0.000342817	0.000856868	0.0163494	0.000359385	7.30025e-06	0.00672695	0.00144964	0.000568432	0.0051178	0.0052787	0.000327671	0.000340262	0.000530502	0.000358661	0.00048838	0.00473918	0.000598786	0.000436589
GCF_000154065_1	0.000762518	9.80315e-05	1.02091e-05	0.000506554	5.16864e-06	0.000250961	9.03985e-05	3.06541e-05	4.33023e-05	0.000152142	0.00426573	0.0034479	0.00761529	0.000239052	0.00374132	0.00271861	0.00279008	0.0133156	0.00446981	0.00067687	0.00013961	0.00509513	0.00825729	0.00437452	0.00019394	0.000463978	1.24324e-05	3.24395e-05	0.00248433	0.00351131	0.00029311	0.0156083	0.00127182	0.000159744	0.000106576	5.27537e-06	1.62868e-05	0.000191179	4.77112e-05	0.0168911	0.00740008	0.000330912	0.0017156	0.000249064	0.000110149	0.000142164	0.000134801	0.000455273	0.00113841
GCF_000154105_1	0.00346994	5.92236e-05	0.0141888	0.00775302	0.000996205	0.00374736	0.000682597	0.0138504	0.0050061	0.000910241	0.000378176	0.0113905	0.000259885	0.000521754	0.0105904	0.00019745	0.0208053	0.000739549	0.00172977	0.0120941	0.0344697	0.000351966	0.00914179	0.0217047	0.0600839	1.3228e-05	2.34785e-05	0.00020872	0.000281692	0.00388724	0.00842608	0.000693201	1.92467e-05	0.00271959	0.0167307	1.12648e-05	0.0359727	1.70822e-05	1.04212e-05	0.0129945	0.00122636	0.00070679	0.000596803	0.000942504	1.35941e-05	0.00205157	0.0194352	0.000142838	0.000144702
GCF_000154205_1	0.000941195	0.00144457	0.000599713	0.0408672	0.00947334	0.0255217	0.139418	0.128787	0.0221292	0.0344857	0.0464124	0.000305644	0.000349281	0.109938	0.00698299	0.00163854	0.00579836	0.027624	0.0011314	0.029489	0.0150194	0.0316715	0.0631129	0.034586	0.0276886	3.82289e-05	4.53507e-05	0.00114465	0.000338573	0.00712537	0.0168797	0.0527851	0.00013144	0.035109	0.0100506	3.07357e-05	0.00225771	4.64667e-05	2.84393e-05	0.0628478	0.000278464	0.0599866	0.000429772	0.000349281	4.39741e-05	0.0321719	0.0235361	0.000127547	0.0133285
GCF_000154325_1	1.16933e-06	8.24479e-06	0.00327439	0.000237667	1.29216e-06	2.77189e-06	4.90601e-05	4.79901e-05	4.30869e-06	1.21128e-05	1.8004e-05	0.0180182	0.000892592	0.000154841	0.000262821	0.000108545	0.0474392	0.0123189	6.6133e-05	0.00435918	1.81396e-05	0.000162764	3.23067e-05	0.000525704	2.3577e-05	1.375e-05	2.83855e-06	1.73717e-05	2.25992e-05	2.9645e-05	1.19442e-05	0.00162156	6.0672e-05	4.35976e-05	0.0214676	4.24161e-06	4.25336e-06	8.91722e-05	7.25591e-06	1.08236e-05	0.00767728	0.00298455	4.84045e-05	2.02876e-05	1.04307e-05	2.20162e-05	7.95245e-06	2.75416e-05	2.45672e-05
GCF_000154345_1	4.48562e-06	0.000208808	5.31872e-05	0.000238721	3.22369e-05	3.84165e-05	3.23079e-05	6.62561e-05	2.67726e-05	2.70407e-05	0.00262928	0.0013852	0.000588579	0.00441553	0.00227483	0.000353589	0.000919075	0.000239395	5.60924e-05	0.000324605	0.00235793	0.000259446	0.00129279	0.00515748	0.00049096	1.54937e-05	1.69433e-06	4.06887e-05	8.83039e-05	0.000176998	0.00159345	0.000423176	0.000121001	0.000467236	0.00106214	4.64659e-06	2.26137e-05	0.000101926	1.07865e-05	0.00121372	0.00314173	0.00211853	0.000669649	0.000658531	3.1178e-05	0.000807876	0.000150176	5.45168e-05	9.00122e-05
GCF_000154425_1	5.69329e-06	5.38327e-05	3.70526e-05	0.000168679	2.21513e-06	5.54796e-05	4.19741e-05	1.4583e-05	4.18138e-05	4.63159e-05	7.33011e-05	0.00022024	0.000108844	0.00016334	0.001964	0.000475792	0.000145683	0.000212662	0.000382517	0.00018122	0.00023889	0.000303896	0.000164105	0.000185356	0.000458532	0.000207338	1.98038e-06	9.57022e-05	0.000212965	0.000142298	0.000121531	0.000260409	0.000171045	9.15604e-05	0.000105529	2.7709e-06	3.18382e-05	0.000136692	5.9703e-05	0.000197478	0.000169895	0.000261457	0.000250355	0.000166162	3.03373e-05	0.000103359	0.000117466	5.10273e-05	0.000208004
GCF_000154465_1	0.00413774	3.80831e-05	0.0196692	0.0189034	0.00996019	0.00024745	5.41643e-05	0.0143252	0.000227871	0.000419783	0.000253758	0.00655533	0.047073	0.000237521	0.0147439	0.00843011	0.00655775	0.000101915	0.000229583	0.0408177	0.000301891	9.38313e-05	0.0288774	0.0300965	0.00923133	1.29836e-05	1.32135e-05	0.000127213	6.55513e-05	0.0178982	0.01577	0.0112289	2.33017e-05	0.0226201	0.00507782	1.41316e-05	0.000167396	2.9535e-05	1.03725e-05	0.0491363	0.000421838	8.24522e-05	0.0315461	0.000130549	1.45773e-05	0.0197419	0.0219892	0.000265705	0.000143335
GCF_000154525_1	0.00124296	0.000889909	0.264195	0.000925177	0.00148118	0.0401489	0.00106511	0.0702406	0.00589761	0.000870283	0.00153158	0.00104883	0.00164514	0.0011377	0.00452506	0.00112661	0.00134676	0.000796091	0.00142793	0.00704655	0.00130294	0.0167808	0.0273113	0.0357358	0.000718978	2.20022e-05	2.48978e-05	0.00107379	0.0002522	0.00355238	0.00105831	0.000887528	2.35973e-05	0.00148879	0.000194293	1.45899e-05	0.0013874	1.59711e-05	1.30752e-05	0.00101108	0.0013762	0.00215255	0.020756	0.000405646	1.70567e-05	0.00211308	0.116483	0.000202177	0.000151341
GCF_000154805_1	6.42173e-06	5.90424e-06	1.6206e-05	1.83867e-06	2.18157e-07	1.61995e-05	3.22331e-05	8.16575e-06	3.36469e-05	5.84765e-05	2.50203e-05	0.000233406	0.000221741	0.000776215	0.000354018	7.24372e-06	4.61254e-05	3.77236e-06	3.87323e-06	0.000456597	0.000530236	8.14495e-05	0.00012795	0.000385981	8.29259e-05	3.37641e-06	1.50729e-06	0.00325077	0.000403719	1.48632e-05	9.76056e-05	0.00113702	6.75763e-05	1.60536e-05	0.00203056	2.87747e-06	8.68394e-06	0.00184793	8.729e-06	0.000101949	7.38358e-05	0.000246161	9.29039e-05	0.000567668	1.17274e-05	0.000725059	1.53047e-05	0.000274333	1.38443e-05
GCF_000154845_1	0.00196434	0.00238527	0.00170122	0.0012167	0.0051436	0.000808835	0.00034602	0.00152465	0.00245779	0.00162735	0.00141673	0.000686381	0.0023176	0.000491357	0.000458835	0.000258612	0.00192257	0.000934646	0.000313811	0.00107672	0.000749575	0.00261914	0.000761554	0.00228503	0.00208395	4.57592e-06	3.0916e-06	0.00263199	0.00174581	0.000796499	0.000461636	0.00157914	7.76725e-06	0.00166938	0.00039143	2.68564e-06	0.00446063	3.26367e-06	2.77575e-06	0.0054252	0.000519008	0.0049824	0.0036245	0.00146442	3.81888e-06	0.00628394	0.00441195	0.000202052	0.000359232
GCF_000155205_1	1.33419e-05	9.44074e-05	5.81847e-06	0.000213324	2.7857e-06	0.000370249	0.000374326	0.00095078	2.33061e-05	0.000134275	7.45284e-05	0.000260524	0.000279865	0.000531543	0.0023855	0.00934738	0.00016462	0.000191571	0.00021417	0.00013114	0.0002684	0.00302123	0.00020887	0.0129936	0.00405368	0.000421385	1.35546e-05	2.16635e-05	0.00363543	0.00234042	0.000100292	0.000273575	0.000778203	0.000159821	0.00135538	3.67677e-06	7.94049e-05	0.00160799	8.57926e-05	0.00024301	0.00348274	0.000739082	0.000323677	0.00024507	0.000321755	0.000133707	0.000743289	0.00027046	0.00034039
GCF_000155815_1	0.00122827	0.000134605	0.010588	0.0803488	0.00110292	0.00176661	0.00461275	0.00397505	0.00101423	0.000907789	0.00170604	0.00210325	0.000609784	0.00198871	0.000842486	0.000161958	0.000251477	0.00095423	6.76227e-05	0.000363588	0.00082935	0.00154933	0.000641038	0.000522414	0.000623284	1.74929e-05	2.45347e-06	0.000133883	0.00396708	0.000329639	0.000382704	0.000499226	5.89933e-06	0.00160912	0.000220919	1.77977e-06	0.00120016	3.28681e-06	2.09033e-05	0.00565273	0.00309142	0.00232724	0.00178336	8.79438e-05	2.36543e-06	0.00102172	0.00528502	0.000196106	0.000790241
GCF_000155875_1	3.31438e-05	8.28405e-05	2.87711e-05	0.000569528	6.9978e-06	0.000792231	0.00034989	7.65423e-05	0.000232375	0.000328137	0.000951942	0.00255665	0.000458588	0.00177748	0.00328682	0.00485684	0.0022737	0.00446096	0.00594909	0.00336753	0.000469553	0.00692065	0.00551926	0.00655856	0.00025811	0.000561572	1.41267e-05	4.1209e-05	0.00468738	0.00226661	0.00229808	0.00887033	0.00180472	0.00198054	0.000191803	4.62527e-06	6.12306e-05	0.000768339	0.000114597	0.000659124	0.00643126	0.000743414	0.0066506	0.000588048	0.000362566	0.000340508	0.000342215	0.000294687	0.000588747
GCF_000156075_1	0.0373166	0.00528662	0.00154734	0.0499105	0.0148387	0.0205713	0.0402465	0.0194744	0.00623759	0.0265366	0.00639968	0.00985192	0.122927	0.00259242	0.00234511	0.0140403	0.00477682	0.00260827	0.00110747	0.0224241	0.0148997	0.0076744	0.0059167	0.124428	0.00731279	4.88913e-05	4.139e-05	0.0197582	0.0196902	0.0121578	0.0145316	0.00902827	6.09912e-05	0.00976566	0.011984	3.2995e-05	0.0300576	4.99735e-05	2.79158e-05	0.0161448	0.00968619	0.135308	0.0112086	0.00964823	4.22072e-05	0.0568958	0.0145776	0.00143128	0.000216382
GCF_000156195_1	0.00212866	0.00130989	0.00557119	0.0104025	0.00270664	0.00291803	0.00210218	0.00793006	0.020905	0.00528522	0.00248291	0.00236741	0.00262394	0.00110753	0.00772006	0.000558716	0.00456299	0.00127174	0.000307485	0.00300014	0.00330635	0.00194319	0.00234443	0.00129791	0.0010021	1.62268e-05	7.09637e-06	0.00153358	0.000625985	0.00235109	0.0022968	0.00370796	1.78398e-05	0.00666913	0.000260548	6.47964e-06	0.000504395	3.44537e-05	1.20648e-05	0.00108893	0.000966703	0.00275071	0.00148935	0.00111105	1.97356e-05	0.0128008	0.00480103	9.67994e-05	0.000883439
GCF_000156495_1	0.000566645	7.36444e-05	0.00112661	0.000598391	0.000383251	0.000262452	0.000806052	0.000638193	0.000146123	0.000237296	0.000199839	0.000917982	0.000254751	7.39024e-05	0.000411648	0.0010566	0.000961854	0.0036185	0.000126238	0.000435826	0.000910652	0.00012797	0.000180743	0.0011622	0.00186162	7.88569e-07	1.26524e-06	0.000115842	0.000144382	0.000229421	0.00042336	0.000391013	1.63148e-06	0.000596622	0.00202108	7.77983e-07	0.0013438	6.59677e-07	2.06964e-06	0.000650147	0.000200531	0.000306148	0.000256235	6.20835e-05	1.13996e-06	0.000261455	0.000937628	6.47689e-05	0.000135338
GCF_000157935_1	0.000322543	0.170849	0.000927957	0.000505443	0.000446802	6.59961e-05	0.000101149	1.4955e-05	0.22151	2.93197e-05	1.72746e-05	0.000103784	6.92809e-05	1.43223e-05	0.0230691	0.0223704	0.0136847	0.000410579	0.113666	1.83153e-05	5.01621e-05	4.17548e-05	1.77085e-05	1.67042e-05	2.04967e-05	1.40943e-05	1.52159e-05	6.14233e-05	1.89364e-05	0.146433	7.93473e-05	1.31755e-05	1.7828e-05	2.23541e-05	2.20424e-05	1.1755e-05	2.01414e-05	1.20015e-05	1.46092e-05	1.30005e-05	0.000169886	2.13399e-05	1.79928e-05	1.22867e-05	1.74985e-05	3.4331e-05	2.2817e-05	1.95048e-05	2.59419e-05
GCF_000157995_1	2.14697e-05	1.23521e-05	0.000142142	0.000815929	9.11224e-06	5.27356e-05	5.4987e-05	6.4396e-05	0.000447868	0.000154891	0.000102316	0.000349758	0.000845858	0.000698376	0.000207507	0.000326988	0.000303587	9.54107e-05	0.000111907	0.000448639	0.000183668	0.000276822	0.00032375	0.000280052	0.000264179	1.73374e-05	2.80554e-06	1.674e-05	0.000348073	0.000157255	0.000295064	0.000757031	0.000159093	3.93643e-05	0.000232379	4.72119e-06	7.23425e-05	7.86058e-05	1.215e-05	0.000547684	0.000823993	0.00010601	0.000420622	0.000585832	6.72579e-06	0.000182015	0.000376896	0.000125399	0.000293391
GCF_000158035_1	0.000440741	2.25146e-05	0.0284808	0.000212309	0.0875	0.000201373	0.000121024	0.000817747	0.000226226	0.000848317	0.000112609	0.018074	0.012372	0.000403826	0.00417305	4.94836e-05	0.00118099	0.000127308	5.65492e-05	0.00467099	0.0008281	0.00218137	0.000110745	0.000357285	0.0675102	8.68537e-06	1.58541e-05	0.000347601	4.21672e-05	0.000102078	0.000196567	0.000393666	9.95438e-06	0.000772969	0.0173266	6.24518e-06	0.000135452	9.69841e-06	6.20891e-06	0.00403515	0.0364057	0.000719925	0.000143556	0.000236777	6.56905e-06	0.00474376	0.000149666	4.48061e-06	4.14925e-05
GCF_000160055_1	0.00395425	7.18324e-05	0.000568497	0.000260708	0.00118469	1.20069e-05	0.00152428	5.58024e-07	0.000153272	0.00365084	0.00709358	0.00317137	6.66942e-06	6.25639e-06	6.95622e-06	0.000130791	4.29129e-06	5.72023e-06	0.000178159	7.62853e-06	6.94147e-06	0.0144108	4.53049e-06	5.99578e-06	6.40094e-06	9.29623e-06	4.89594e-06	4.9068e-05	5.16038e-06	2.55661e-05	0.0108652	0.000434548	2.76287e-05	5.05798e-06	5.10739e-06	6.226e-05	4.70528e-06	6.20328e-06	1.7251e-05	3.64454e-06	4.94363e-06	0.0102772	3.67802e-06	0.0011904	1.88807e-05	5.08065e-06	0.0158725	3.43957e-06	1.77259e-05
GCF_000162015_1	5.3885e-05	0.00194493	0.000584828	0.00412636	5.60327e-05	0.00467791	0.0148098	0.00226035	0.00198654	0.000119021	0.00745276	0.0245489	0.000894339	0.00677149	0.0176676	0.00664369	0.0115393	0.00099064	0.00357369	0.00267438	0.000357101	0.00569204	0.00241668	0.0196182	0.015962	5.93315e-05	3.6153e-05	0.000230439	0.018094	0.00927148	0.00107637	0.00211536	0.000775673	0.000178646	0.000750532	1.11795e-05	0.000220218	4.98809e-05	7.08181e-05	0.00119408	0.000870826	0.000877831	0.0109452	0.00235563	3.20758e-05	0.000276132	0.000301813	0.000226595	0.000358221
GCF_000164675_2	5.17572e-07	3.02007e-08	2.14177e-07	4.40515e-07	3.35626e-08	7.24313e-07	2.87929e-06	6.51028e-07	1.01842e-06	3.6099e-06	5.30857e-05	5.96392e-05	0.000122665	9.75034e-06	4.65499e-05	1.05372e-05	9.66917e-06	1.07442e-05	8.38208e-06	6.02551e-07	0.000143981	5.89437e-05	2.58885e-06	7.27892e-06	1.81035e-05	0.00011763	0.000141564	0.000171041	0.000366062	4.46941e-05	6.7342e-05	0.000206917	0.000187975	0.000135411	1.3681e-05	6.0768e-05	3.14483e-05	3.3713e-05	0.000109423	4.02979e-05	9.5504e-06	0.000156561	1.20444e-05	8.14157e-05	0.000117801	3.66831e-05	0.000387989	1.92883e-05	0.000128205
GCF_000169235_1	4.07732e-05	0.000199596	6.16115e-05	0.000550337	1.20658e-05	0.000220386	0.00219493	4.55348e-05	0.000135645	0.000309781	0.000268937	0.00262892	0.00333603	0.00181348	0.00144418	0.00136459	0.00133394	0.00214111	0.00185057	0.0014089	0.000546196	0.00173581	0.00181819	0.000548089	0.000892009	0.000534394	6.29321e-06	7.13818e-05	0.00205439	0.00230583	0.000553733	0.000967507	0.00154302	0.000410279	0.000323761	2.35526e-06	9.20232e-05	0.000407519	0.000164524	0.000631129	0.000951471	0.000404044	0.00389182	0.000589017	0.000340864	0.000381708	0.000300392	0.000472288	0.000737177
GCF_000172175_1	0.00183713	0.000107318	0.0031049	0.00112959	0.00429615	0.000784208	0.000679438	0.00387656	0.000825348	0.00257034	0.00165484	0.0011126	0.00181938	0.00190564	0.000531299	0.000132761	0.0059632	0.000582706	0.000166946	0.00292452	0.00214614	0.000719582	0.000601477	0.00230019	0.00193221	9.69607e-06	2.68452e-06	0.000682029	0.000223033	0.000320494	0.000751277	0.00177035	8.46477e-06	0.00449885	0.0010877	2.29132e-06	0.00147743	5.97182e-06	1.69223e-06	0.00206055	0.00157066	0.00318945	0.000611629	0.00106386	3.12065e-06	0.00295667	0.00181185	0.000688323	0.000267708
GCF_000173975_1	0.00029101	2.19559e-05	1.44926e-05	0.000348983	2.23191e-06	0.000130683	0.00024861	2.45159e-05	3.1238e-05	0.000431723	0.00174846	0.00299443	0.00400126	0.000250862	0.00610713	0.000944099	0.00198186	0.00240161	0.0114428	0.00418773	0.000363503	0.000805745	0.00255958	0.00239684	0.000688427	0.00101053	6.13918e-06	1.75017e-05	0.00392768	0.00153366	0.000346297	0.000227446	0.000377309	0.00200733	1.69775e-05	2.83484e-06	1.10942e-05	0.000791833	6.43049e-05	0.0065799	0.000961268	0.00304562	0.000575734	0.000313549	4.45441e-05	0.000139551	0.00132774	0.00285425	0.00325321
GCF_000174195_1	0.000127054	0.000328115	7.73178e-05	0.00156908	3.76069e-05	0.00167201	0.00227561	0.00010928	0.00192432	0.000409824	0.000258459	0.00150575	0.00132433	0.00111706	0.00262074	0.00268321	0.00161775	0.00110495	0.00135534	0.00215973	0.000439183	0.00187586	0.00143155	0.00110712	0.00247306	0.000346671	4.29083e-06	4.30112e-05	0.00150609	0.00280976	0.00229831	0.0011146	0.0321655	0.00101212	0.000506452	4.10306e-06	0.000222779	0.000191283	0.000104188	0.000598255	0.00422643	0.00128567	0.00180091	0.000891486	0.00030192	0.000379345	0.000612238	0.00702388	0.000411828
GCF_000180035_1	3.25879e-07	6.04014e-08	2.14177e-07	7.08654e-07	1.84594e-07	1.07254e-06	2.78581e-06	1.07885e-06	6.85473e-07	3.20774e-06	6.54396e-05	2.43383e-05	0.000174042	1.02701e-05	3.58487e-05	9.49665e-06	8.27549e-06	1.16873e-05	5.065e-06	7.50347e-07	0.000214164	6.18987e-05	2.7956e-06	5.98411e-06	1.36492e-05	0.000118507	0.000138077	8.31425e-05	0.000171267	5.22129e-05	5.52023e-05	0.000167644	8.47186e-05	0.000166572	8.72925e-06	4.7052e-05	4.16563e-05	4.47076e-05	0.000150122	2.58787e-05	8.96773e-06	0.000135831	6.43653e-06	0.000100045	0.000120266	3.24911e-05	0.000509257	1.38249e-05	0.000145325
GCF_000187895_1	0.00156424	0.00163076	0.00334476	0.00169564	0.00404181	0.000750959	0.000389022	0.00442221	0.00148231	0.00160862	0.00218742	0.00383933	0.00214557	0.00143952	0.000616659	0.000342304	0.000845431	0.00108636	0.000247271	0.00125374	0.00171883	0.00232793	0.000766579	0.00263889	0.00105473	3.23202e-06	3.28963e-06	0.00208756	0.00125284	0.00851777	0.000901728	0.00208589	8.34654e-06	0.00142269	0.000755569	3.13325e-06	0.00330454	2.8586e-06	3.87144e-06	0.00345929	0.000776633	0.00380725	0.00186519	0.00125242	3.50539e-06	0.00227934	0.00401526	0.000118736	0.000254923
GCF_000188295_1	1.47604e-06	7.55017e-08	3.21265e-07	4.40515e-07	0	5.71093e-07	4.46851e-06	1.09745e-06	3.54487e-06	3.7746e-05	0.000318827	0.000176431	0.000140569	1.20796e-05	0.000155215	8.5975e-06	5.82434e-05	0.000100399	0.000144412	2.10324e-06	8.85984e-05	5.89645e-05	2.28682e-05	8.30544e-06	0.00029671	0.000592826	3.49867e-06	0.000309086	0.000207417	6.16955e-05	7.16287e-05	0.000180176	0.000128532	0.00237064	4.6971e-06	4.90449e-05	6.0823e-05	2.29845e-05	6.49136e-05	6.51492e-05	4.0596e-05	0.00030478	2.55645e-05	0.000273518	0.00561698	3.16443e-05	0.000490201	8.27913e-05	0.000197225
GCF_000190535_1	0.00011099	4.76567e-05	0.000186941	0.00533789	0.0016317	0.000148874	6.81307e-05	0.00368612	0.000140659	0.000115727	0.000182228	0.0016341	0.000245301	0.000350502	0.00266363	0.00449339	0.00568051	0.00043472	0.000262218	0.00299267	0.000263168	0.00103404	0.00462347	0.00378924	0.00576545	5.77544e-06	3.93876e-06	6.90408e-05	0.000100952	0.00247248	0.000201195	8.07402e-05	5.49737e-06	0.00282533	0.00191916	2.47249e-06	0.000772552	4.32841e-06	3.43316e-06	0.00347567	0.000210191	9.88967e-05	0.00382682	2.89254e-05	4.34612e-06	0.0221859	0.00785926	0.000364536	3.64302e-05
GCF_000191405_1	2.20447e-06	1.57648e-05	5.71138e-07	2.48412e-05	3.03741e-06	5.48806e-06	7.29171e-05	2.97613e-07	2.35019e-05	7.57409e-06	1.55147e-06	4.19625e-07	1.93037e-07	9.4327e-07	2.16091e-06	6.93054e-06	6.37787e-07	2.73231e-07	1.32087e-06	5.58213e-06	3.21258e-07	3.14228e-06	2.24727e-07	7.52855e-05	4.54593e-06	4.55371e-07	2.42047e-07	0.000139587	0.000244279	5.81047e-07	2.76012e-06	5.2468e-06	3.79732e-05	3.29868e-07	2.2764e-05	1.81068e-05	4.25336e-07	5.70563e-06	1.37448e-05	1.4676e-07	2.88606e-06	5.11836e-05	9.08152e-08	0.000655094	0.000110776	1.08722e-06	3.94221e-05	0.000546501	8.75781e-05
GCF_000205025_1	1.19233e-05	1.17783e-06	4.19608e-05	0.000109573	0.000455109	1.75646e-05	9.53531e-07	0.000931714	2.13476e-06	3.11198e-06	1.02698e-05	0.00394575	7.58635e-06	0.000421344	0.000236873	7.15179e-05	0.000198116	1.48691e-05	4.30624e-05	0.000317579	6.31042e-06	0.00307228	0.00027227	6.11243e-06	0.0066397	2.6878e-06	3.22362e-06	1.18165e-05	0.000395482	0.000445779	0.0014141	4.29984e-05	7.09338e-06	4.7501e-06	1.35395e-05	2.95207e-06	1.5702e-05	2.95119e-06	2.78792e-06	0.0130241	0.00512479	0.00523671	0.00641046	5.66566e-06	1.43493e-05	0.00119225	0.0102478	1.98213e-06	0.0066722
GCF_000210575_1	0.000306364	3.22694e-05	0.000560715	0.00337681	0.00370204	0.00212339	0.00262939	0.00361095	9.0267e-05	0.000336161	0.00264329	0.0132339	0.00201122	0.00259233	0.00169605	0.0115167	0.00485722	0.0152239	0.00282061	0.00695033	0.000254677	0.000116566	0.00119165	0.000616994	0.00307977	3.98727e-06	3.88375e-06	2.96712e-05	0.00107414	0.00470499	0.000366619	0.000221584	1.0841e-05	0.000390476	0.000758214	3.53823e-06	0.000122887	7.47634e-06	4.1271e-06	0.0105233	0.0170255	0.000256136	0.00234498	3.24946e-05	4.60261e-06	0.00281995	0.00637265	0.00611992	0.00107817
GCF_000210895_1	8.05112e-07	1.97664e-05	1.07088e-06	2.81163e-05	1.74525e-06	1.67149e-06	9.33526e-05	4.6502e-07	1.7176e-05	2.44171e-06	6.8311e-07	3.357e-07	3.86074e-07	6.8339e-07	2.7205e-06	7.92061e-06	8.97627e-07	3.52557e-07	9.53412e-07	5.25243e-06	2.40943e-07	1.40466e-06	1.16858e-07	7.81084e-05	6.00016e-06	1.99919e-07	1.14422e-06	0.000157348	0.000244829	3.37007e-07	1.64874e-06	5.36382e-06	3.88717e-05	6.2675e-07	2.51691e-05	1.28527e-05	7.13324e-06	4.33998e-06	1.3757e-05	2.3237e-07	2.44905e-06	5.3999e-05	1.36223e-07	0.000253774	8.02393e-05	5.43609e-07	1.88158e-05	0.000639727	9.49451e-05
GCF_000225345_1	0.000592486	0.000170755	9.23459e-05	0.000839257	7.8033e-06	0.000646394	0.000555965	7.53704e-05	0.00307818	0.000203792	0.000339343	0.00421212	0.00115272	0.000663004	0.00200623	0.00546685	0.000636677	0.00463267	0.00320666	0.000814968	0.000464585	0.00106801	0.000852757	0.000773327	0.000897895	0.000480483	3.04759e-06	3.13248e-05	0.00579733	0.00110321	0.000792899	0.000412761	0.000616935	0.000220968	0.000708131	3.33574e-06	0.000209327	0.000142398	9.13076e-05	0.000447789	0.00583541	0.00215298	0.0011473	0.00123397	0.00019415	0.000269212	0.000555241	0.000595105	0.0003062
GCF_000231275_1	2.68371e-07	1.96305e-07	5.17594e-07	4.70202e-05	6.04127e-07	1.28148e-06	2.05664e-07	0.000129741	4.50453e-07	1.30895e-05	1.44727e-06	9.12685e-07	1.37056e-06	5.8425e-06	0.00174849	0.00011592	0.00461439	2.33569e-06	0.000447895	0.0001372	2.6389e-07	1.58154e-06	1.92276e-05	5.83247e-07	4.77265e-05	5.5533e-07	2.20042e-07	1.00328e-06	1.12771e-05	0.000340238	2.14947e-06	7.89945e-07	3.90136e-07	3.17773e-06	0.000487749	1.91831e-07	2.21529e-07	3.24052e-07	3.04359e-07	6.4819e-06	0.00212749	5.63088e-07	0.000452861	3.18445e-07	4.70235e-06	0.000660359	9.40689e-05	1.92383e-06	3.3236e-06
GCF_000233955_1	0.00711119	0.000339335	0.00014523	0.000442353	0.00126526	0.00413563	2.87368e-05	0.00015833	0.000459521	0.00275196	0.00125295	0.000460581	0.000516537	0.000394018	0.000297577	0.00210816	0.00668711	0.000763726	0.000213693	0.000796357	0.000498145	0.000849071	0.000670477	0.000648174	0.000713172	2.67669e-06	1.92537e-06	4.70615e-05	6.30433e-05	0.00446638	0.000322909	0.000203786	4.83532e-06	0.00434995	0.000242523	2.67498e-06	0.000380552	1.48138e-06	1.76528e-06	0.00113719	7.97718e-05	0.000603044	0.00217147	0.00098004	2.33693e-06	0.0053988	0.00147776	1.01605e-05	0.000240626
GCF_000239295_1	0.00342291	0.000177701	0.00107809	0.000178753	0.00046548	0.000528818	0.00168573	0.000568775	0.00174214	0.000630296	0.000928242	0.000989665	0.00369686	0.00113886	0.000246955	0.000129447	0.000403861	0.000171651	0.00012873	0.000826086	0.00362028	0.0025587	0.000960662	0.000737072	0.00158094	9.50725e-06	4.56588e-06	6.53435e-05	0.00118185	0.000343445	0.000655357	0.00496376	0.00125179	0.00246118	0.000641381	5.19011e-06	0.000148265	0.000859872	2.17921e-05	0.00308194	0.000807988	0.00214178	0.000498848	0.00493455	2.17306e-05	0.00560382	0.00506981	0.0147696	3.68184e-05
GCF_000265365_1	0.0022675	3.97441e-05	0.000387	0.00208609	0.00717973	0.000249484	0.000197867	0.000621695	6.75484e-05	0.000450299	0.0981468	0.00631693	0.00311734	0.00655269	0.00139723	0.0100858	0.00208197	0.000842998	0.000159508	0.00174831	0.000234472	0.000322125	0.00825405	0.000201862	0.000842622	3.79846e-06	3.37765e-06	0.000112721	0.00182382	0.000272662	0.000651913	0.000237793	0.000177382	0.000564196	0.00123593	3.88992e-06	0.000244958	5.19641e-06	4.52885e-06	0.00154019	0.000817392	0.000165042	0.058153	5.31803e-05	6.82554e-06	0.00304426	0.011279	0.007484	6.02858e-05
GCF_000296465_1	0.000218109	2.47042e-05	0.000346413	0.003677	0.000571957	0.00231158	0.000169915	0.000648238	6.02237e-05	0.000532264	0.00130149	0.00364333	0.000533042	0.00195256	0.00794991	0.00802728	0.0114074	0.000167544	9.5798e-05	0.0141967	0.000132404	0.000543552	0.0166989	0.000427357	0.00309212	2.78776e-06	5.02797e-06	8.83262e-05	0.000231883	0.000284492	0.00451207	0.000243342	9.90709e-06	0.000369112	0.00012859	3.35705e-06	0.00017499	9.67527e-06	3.05576e-06	0.00126518	0.000599572	0.000209204	0.0228451	7.71565e-05	3.3344e-06	0.000380464	0.00101187	0.000133261	0.00433881
GCF_000297775_1	0.000606556	0.00187978	0.00146256	0.00286762	1.65128e-05	0.0117427	4.59191e-05	5.76625e-07	0.00418867	8.90985e-05	3.84394e-06	2.48628e-06	4.70045e-05	7.9023e-06	0.00159477	0.000101766	0.00068011	9.95973e-07	6.08992e-05	1.36086e-05	3.74036e-06	9.7806e-06	9.33066e-06	5.83247e-07	1.6031e-06	4.22051e-07	5.06098e-07	1.87651e-06	1.1268e-05	1.22601e-05	0.000125744	4.48611e-07	6.38404e-07	8.46662e-07	1.3582e-06	1.41742e-06	4.38628e-06	4.62931e-07	2.02094e-06	1.45537e-06	1.71161e-06	7.00987e-07	7.37874e-07	1.30032e-06	1.11147e-06	5.82289e-06	1.58049e-06	4.24742e-07	2.45833e-06
GCF_000311925_1	0.000153738	8.31576e-05	0.00363797	0.00162127	0.000872074	0.000823488	0.000233671	0.000847657	2.29731e-05	0.000459051	0.00207583	0.00831661	0.00273442	0.00382341	0.00213219	0.00773425	0.00648788	0.000168769	0.00158677	0.00662967	0.000107346	0.000954878	0.000427457	0.000663618	0.00039269	1.96587e-06	3.1356e-06	6.53064e-05	0.00037586	0.000740044	0.000670855	0.000227436	9.32779e-06	0.000519861	0.000281982	3.07996e-06	3.97866e-05	5.64776e-06	3.23837e-06	0.00228293	0.0060912	6.54906e-05	0.00206853	3.61169e-05	4.16087e-06	0.000556561	0.00200034	7.19396e-05	0.000191435
GCF_000312145_1	1.04665e-05	1.84224e-06	0.000222762	0.000433601	0.000337606	8.565e-05	0.000514421	0.000272446	1.5335e-05	7.33949e-05	0.00107213	0.000594892	0.000478519	0.00130571	0.000600181	0.00505586	0.00038605	0.000743489	0.000235215	0.00139456	8.74281e-06	4.57399e-05	0.000437534	0.00361927	0.000850912	7.21929e-07	8.91172e-07	4.23609e-06	0.00306625	0.000468219	0.00014559	0.000127435	3.32207e-06	7.69473e-05	0.000270211	1.12967e-06	0.000133857	1.60869e-06	1.14439e-06	0.000983366	0.000559504	9.37944e-05	0.000549693	1.69174e-05	9.8322e-07	0.000252214	0.000408046	0.00269567	6.09974e-05
GCF_000321205_1	2.83706e-06	4.5301e-07	3.10378e-05	0.000230657	6.62861e-06	1.17701e-05	1.20781e-05	0.00142884	4.36744e-06	1.21032e-05	7.97733e-06	1.65647e-05	1.23351e-05	4.44685e-06	0.000303052	3.80876e-05	0.00100203	5.08034e-05	9.14679e-06	0.00417859	2.38534e-05	3.86022e-06	0.00427763	0.000143199	0.000351823	2.88772e-07	1.30925e-06	4.27325e-06	3.91539e-06	0.000251233	2.46701e-05	5.23704e-06	9.33962e-07	2.77089e-06	1.64823e-05	3.81638e-05	1.47095e-06	2.31466e-06	4.74799e-07	3.86346e-05	2.77499e-05	1.07217e-05	2.13983e-05	6.22294e-06	1.82252e-05	0.000569639	2.42375e-05	5.46334e-05	7.02728e-06
GCF_000332875_2	0.00137693	2.35565e-05	0.000162989	8.92904e-05	7.44586e-05	0.000253537	0.000568548	1.23695e-05	7.30126e-05	0.00863997	0.00129729	0.00507066	0.0014329	0.00671422	0.00480954	0.00120255	0.00135851	0.0108666	0.00449253	0.00546158	0.00597283	0.00597129	0.00194128	7.07595e-05	0.00151605	0.000102892	1.18383e-05	5.93796e-05	0.0108774	0.00143632	0.00728033	0.0141187	0.0215913	0.000491834	2.92296e-05	1.04761e-05	1.79793e-05	3.52638e-05	1.6131e-05	0.00588922	0.00693004	0.000117697	0.0063579	0.0173185	0.000102412	5.03465e-05	0.0024152	6.71841e-05	0.0216542
GCF_000374505_1	0.000522153	2.89172e-05	0.00429201	0.00879467	0.000861048	0.00033916	7.51607e-05	0.000754021	0.000123973	0.00415769	0.019141	0.0101326	0.0230775	0.0723719	0.0057463	0.000817743	0.0120941	0.000734226	0.000581919	0.0200547	0.000288708	0.0094049	0.014734	0.00052722	0.00680437	1.29725e-05	1.28285e-05	9.51819e-05	0.0391828	0.000543767	0.00312054	0.00211972	5.23728e-05	0.00547166	0.0142675	1.24158e-05	0.000309928	1.94778e-05	1.05552e-05	0.00132142	0.000610934	0.000764145	0.00211389	6.46708e-05	1.6501e-05	0.0092203	0.0017875	0.244496	0.000170587
GCF_000381365_1	0.00483054	0.000321668	0.00172743	0.00181168	0.00184025	0.00150565	0.000622095	0.00297505	0.000990625	0.0015203	0.00151836	0.000482212	0.00165048	0.00270771	0.000524265	0.000204815	0.00034561	0.0112355	0.000333009	0.000525925	0.00212648	0.000411722	0.000480691	0.00115926	0.00222324	3.66518e-06	2.31045e-06	0.000971012	0.000192684	0.000355043	0.000958554	0.000683117	6.23035e-06	0.00412046	0.00472422	2.09949e-06	0.000984555	2.08319e-06	3.2749e-06	0.00315039	0.000302891	0.00195721	0.000972324	0.00121795	3.12065e-06	0.00734397	0.00288478	9.24437e-06	0.000470334
GCF_000382445_1	0.00807198	0.000501105	0.00288782	0.0184999	0.00252723	0.0577124	0.00281912	0.00378997	0.0486709	0.00325394	0.000808489	0.00745117	0.00119522	0.00203705	0.0131807	0.000314309	0.000753802	0.00200955	0.00133929	0.00117186	0.00450773	0.000975615	0.0012071	0.00151788	0.00181813	1.36278e-05	1.92757e-05	0.00126908	0.00162591	0.0143509	0.00704938	0.0010061	1.50498e-05	0.0471926	0.000940411	9.00542e-06	0.00396711	9.35122e-06	9.65425e-06	0.00361976	0.0213906	0.0308708	0.00183693	0.00170482	1.22689e-05	0.0016958	0.0380201	6.97909e-06	0.000658712
GCF_000424325_1	0.018208	2.63199e-05	2.62367e-05	8.36786e-05	2.32589e-05	3.62157e-05	0.000105038	0.000182083	6.51787e-05	0.00109165	0.000107063	0.000116205	0.000111498	0.000380744	5.98941e-05	6.48803e-05	0.000168691	3.54937e-05	6.48419e-05	0.00014858	0.000482862	0.000193396	0.000113631	0.00016703	0.000157161	0.000146252	8.47163e-07	0.000157813	0.000131527	6.84938e-05	9.43691e-05	0.000261667	0.00473993	0.000465565	0.000280765	7.24697e-07	0.0020536	0.000322825	0.000255698	0.000265049	0.000114741	0.000278775	0.000146405	0.000427194	2.19301e-05	0.000875973	0.000315147	0.00994623	0.000113253
GCF_000425045_1	2.30032e-07	8.33539e-06	3.03417e-07	1.91911e-05	4.53095e-07	0.0036229	1.04701e-06	0.000574281	1.21427e-05	1.78005e-05	9.14672e-06	0.00755659	5.81041e-06	1.85959e-05	1.8725e-05	6.88002e-06	0.000527206	2.44146e-05	2.66459e-05	7.90138e-06	7.35451e-06	3.41281e-06	0.00696025	5.43586e-06	1.19087e-05	4.69809e-06	4.69791e-06	8.8066e-06	3.77105e-06	3.33869e-05	0.0215378	2.95498e-06	8.29925e-06	6.0146e-06	8.4463e-06	6.81108e-05	4.2445e-06	4.7219e-06	3.78622e-06	3.69346e-06	5.28049e-06	0.0199497	7.66253e-06	2.20125e-05	1.06729e-05	1.27748e-05	0.0405977	2.61508e-06	4.05302e-05
GCF_000448565_1	7.66773e-08	1.66104e-07	2.67721e-07	6.32043e-07	3.35626e-08	1.51827e-06	1.81358e-06	3.90617e-07	3.91699e-07	2.11615e-06	4.468e-05	3.53534e-05	0.000186097	1.05492e-05	4.71439e-05	9.02182e-06	1.03542e-05	1.25246e-05	5.34308e-06	3.18329e-07	0.000176072	7.43534e-05	2.472e-06	5.00426e-06	1.50233e-05	8.77311e-05	0.000190755	9.71513e-05	0.000184854	5.28636e-05	4.69708e-05	0.000177113	7.44095e-05	0.000243014	8.7434e-06	4.38761e-05	6.25066e-05	2.51488e-05	9.6299e-05	2.62089e-05	8.44878e-06	0.000109791	6.67492e-06	0.000129342	9.00002e-05	2.92608e-05	0.000312326	1.15596e-05	0.000132063
GCF_000468015_1	1.05431e-06	9.39695e-05	1.74911e-05	4.54113e-05	1.15791e-06	3.0254e-05	5.11915e-05	0.000497144	4.73564e-05	1.0102e-05	1.94281e-05	0.000166749	4.70624e-05	5.56241e-05	0.00408981	0.000130104	0.000117306	5.13234e-05	0.000147908	0.000191679	1.91607e-05	0.011867	0.00197737	0.000103223	0.000162359	3.65741e-05	1.12222e-06	5.42517e-06	7.05312e-05	7.06437e-05	4.03514e-05	0.000117907	0.000132634	2.10126e-05	7.19845e-05	2.73893e-06	1.01017e-06	4.93022e-06	1.21743e-06	3.50634e-05	0.000163322	4.82417e-05	0.000104914	5.63382e-05	9.98894e-06	2.69086e-05	2.78486e-05	2.8949e-05	2.08392e-05
GCF_000469345_1	3.40256e-05	0.000395146	0.000109141	0.000943736	2.55244e-05	0.000845385	0.000463921	3.90989e-05	5.08817e-05	0.00494676	0.000876742	0.0011905	0.000728646	0.00125161	0.00142219	0.0014998	0.000871068	0.00617472	0.0036176	0.00296958	0.000580754	0.002234	0.000857288	0.00107744	0.000491887	0.000527308	4.01027e-05	0.000705978	0.00345107	0.000878636	0.000662721	0.00419143	0.00814269	0.000237043	0.000240543	8.16882e-05	6.6441e-05	0.00590036	0.000202216	0.00234838	0.00122631	0.00063776	0.00543686	0.00124509	0.00108272	0.000691157	0.000245335	0.000442922	0.000925854
GCF_000473955_1	0.000119137	9.25651e-06	5.74708e-05	0.000154142	0.000597867	0.000134068	7.45063e-05	7.28407e-05	0.000128164	0.000563288	0.00015033	2.89017e-05	3.1658e-05	1.96451e-05	9.60355e-05	8.74298e-05	0.000877092	1.61118e-05	1.00704e-05	0.000706156	7.21339e-05	0.00136432	0.000270481	0.000245955	3.26001e-05	3.55411e-07	3.6307e-07	2.00285e-05	0.000169282	3.51417e-05	1.63775e-05	1.78567e-05	7.09338e-07	5.32847e-05	1.951e-05	5.32865e-07	5.18378e-06	5.32371e-07	2.8001e-07	2.99635e-05	3.10638e-05	8.33141e-06	3.12404e-05	0.000457685	2.99241e-07	0.000158357	5.99184e-05	2.4152e-07	1.54778e-05
GCF_000484655_1	0.000208102	0.000158418	0.00012565	0.00172387	4.00066e-05	0.000442917	0.0024609	0.000241401	0.000255388	0.0134014	0.00382063	0.0039674	0.0200277	0.00814861	0.00668952	0.00187678	0.00857385	0.00908373	0.00844725	0.0016633	0.00782345	0.0169518	0.00303182	0.00443186	0.00504847	0.00155753	2.37206e-05	0.000156327	0.00718664	0.0125476	0.0192885	0.00109016	0.0472996	0.0126611	0.000669068	2.18688e-05	0.000406922	0.0053301	0.000464195	0.0311339	0.0159961	0.0206624	0.0105325	0.037587	0.000105945	0.00708692	0.015375	0.00142846	0.0366763
GCF_000508885_1	0.00340472	0.000177429	0.00249484	0.000392767	0.000950258	0.000643357	0.00161349	0.00119114	0.00165751	0.000752181	0.00168051	0.00134264	0.00390235	0.00200167	0.000380948	0.000330726	0.00064711	0.000404788	0.000279479	0.00133368	0.00521523	0.00188838	0.00114441	0.0012242	0.0016614	6.63064e-06	5.53407e-06	8.55393e-05	0.00136445	0.000615782	0.000963501	0.0104999	0.00162184	0.00280449	0.000747801	5.95743e-06	0.000489748	0.000776845	1.39274e-05	0.00516967	0.000975598	0.00282466	0.000651701	0.00434823	6.19856e-05	0.00582644	0.0102013	0.0120812	6.24692e-05
GCF_000519105_1	0.000108652	2.90078e-05	0.000105179	0.000461717	0.000170263	0.000256184	7.8713e-06	0.000214858	0.000107247	0.000172078	1.87218e-05	1.34595e-05	7.43481e-05	6.71743e-05	0.000914614	0.000421338	0.000868186	0.000179372	2.13326e-05	0.00139159	0.00016406	1.29957e-05	0.000117011	5.17457e-05	0.0030763	4.22051e-07	9.46182e-07	4.32527e-05	1.55353e-05	0.000105169	0.000121531	6.41708e-06	6.26582e-07	3.19642e-05	0.000122846	3.73006e-07	3.56396e-05	1.08789e-06	5.84368e-07	0.000113922	3.527e-05	0.000126178	7.76583e-05	0.000335137	6.83979e-07	0.000204491	0.000275945	4.51392e-06	2.8287e-05
GCF_000614125_1	0.00131758	0.000314767	0.000661771	0.00167074	0.00130324	0.00909651	0.00476595	0.045023	0.00614718	0.00631062	0.00176233	0.000221059	0.000589119	0.0186279	0.000344402	0.000252156	0.00110063	0.00429363	0.000131382	0.00337304	0.00175327	0.0051686	0.00205453	0.0070196	0.00455211	7.70798e-06	7.22839e-06	0.000221447	0.000188056	0.00157365	0.00303293	0.00775012	1.21888e-05	0.00566251	0.00192225	5.07288e-06	0.00067997	5.98339e-06	4.48016e-06	0.0138895	0.000266756	0.00570114	0.000316116	0.000103985	6.92529e-06	0.00520994	0.00247885	0.000121884	0.0020136
GCF_000723465_1	1.61214e-05	5.13412e-06	8.74555e-06	0.00828643	5.30289e-06	6.15666e-06	0.00133522	1.05281e-05	6.93307e-06	4.41614e-05	0.00106804	0.0170675	6.1849e-05	6.26312e-05	0.00343082	0.000107838	0.000176935	5.87712e-05	6.9748e-05	0.00106888	2.10424e-05	0.00753443	0.00567263	0.00569672	0.000724314	9.69607e-06	6.10618e-06	7.716e-05	0.00352279	2.41134e-05	2.27649e-05	4.16038e-05	0.000961472	3.80228e-05	0.000150986	7.26828e-06	4.71414e-06	8.7957e-06	7.99854e-06	0.00046057	0.0127988	3.90255e-05	0.00422725	7.00579e-05	2.89266e-05	6.6958e-05	0.000125959	6.98741e-06	0.000289267
GCF_000742135_1	4.60064e-07	1.2186e-05	3.39113e-06	1.25068e-05	8.64237e-06	5.57164e-08	2.50536e-06	7.44032e-08	2.15434e-07	0.00467674	1.66494e-05	1.02703e-05	0.0025069	8.45093e-06	1.05893e-05	1.11939e-05	7.28337e-06	9.11359e-06	1.01697e-05	4.79995e-05	1.62924e-05	8.39675e-06	1.09127e-05	8.62039e-06	1.25156e-05	0.000147251	0.49876	4.33456e-05	1.59683e-05	1.40032e-05	8.53682e-06	9.82067e-06	0.000148015	0.000415381	7.79549e-06	0.00126531	0.000160219	0.0164304	0.00913735	6.92096e-05	8.68549e-06	0.00111389	8.23013e-06	1.59488e-05	0.000202187	0.00102213	2.17467e-05	8.8113e-06	0.000118987
GCF_000752095_2	3.33546e-06	1.51155e-05	0.000360156	0.000129033	1.30894e-06	0.000402036	3.52806e-05	1.45644e-05	6.37685e-05	0.000105367	9.46165e-05	0.000286037	0.000246769	0.000140576	0.00243786	0.000788737	0.000392885	0.000493359	0.0011935	0.00138693	0.000467832	0.00180162	0.00275989	0.0017776	4.85853e-05	4.83915e-05	9.14276e-06	0.000539953	0.00068689	0.000983189	0.000442706	0.000446163	0.00142348	4.44552e-05	9.37864e-05	6.35175e-06	1.774e-05	0.000232693	1.52423e-05	0.00505462	7.71316e-05	0.000375361	0.00122977	5.72272e-05	2.01631e-05	0.000119186	0.000100041	8.79048e-05	0.00673743
GCF_000765235_1	3.09393e-05	2.11556e-05	0.00012781	0.000398972	3.14817e-05	0.000103897	9.98403e-05	0.000230297	0.00021281	3.30636e-05	0.000229583	0.000679289	0.000541681	0.000758505	0.00664721	0.0118206	0.00383004	0.0127661	0.00767033	0.00435521	0.000314649	0.00104459	0.0130408	0.00531612	0.00183708	4.34268e-06	7.7675e-06	0.000103561	0.000233137	0.00454928	0.000149645	0.00137267	0.000220521	7.93003e-05	0.00129886	4.9663e-06	0.000260447	0.000175764	3.59995e-05	0.00121394	0.00075521	0.000176258	0.0119131	0.000255379	1.98211e-05	0.000886626	0.000199691	0.00014024	0.00014285
GCF_000785515_1	1.28435e-06	6.04014e-08	8.56707e-07	1.24493e-06	6.71252e-08	2.46545e-06	2.0772e-05	5.39423e-06	2.89857e-06	0.000134572	0.0015751	0.000744929	0.000627553	7.56349e-05	0.000633102	3.5178e-05	0.000105534	0.000311687	0.0001346	3.05823e-06	4.73052e-05	0.000295634	4.13048e-05	4.00107e-05	0.000192143	0.00160151	9.49483e-06	0.00041523	0.00114226	0.000174663	0.000318623	0.000767241	0.000181531	0.00131064	2.71357e-05	0.000191608	6.87272e-05	8.78181e-05	0.000358473	0.000271995	4.40466e-05	0.00124916	0.000104596	0.00251968	0.00355338	0.000105011	0.00204397	9.56668e-05	0.000939553
GCF_000803105_1	0.000165105	2.74977e-05	0.000814336	0.000200089	0.000126481	5.04373e-05	0.000168831	9.74496e-05	0.000129887	0.000221315	7.07539e-05	0.000137931	0.000393602	7.84936e-05	9.15845e-05	0.000942017	7.29125e-05	0.000323321	9.98997e-05	0.000318465	0.000198147	0.000210553	5.30715e-05	0.000373045	6.89904e-05	4.55371e-07	1.76034e-07	2.90952e-05	3.40567e-05	0.000486301	9.95841e-05	0.000169282	4.96537e-07	0.000325492	8.55948e-05	4.58264e-07	9.3122e-05	3.00905e-07	1.01047e-06	0.000191632	4.85623e-05	8.67386e-05	0.000136007	7.01375e-05	2.70742e-07	0.00122582	0.000147105	1.72478e-05	0.000131505
[truncated: 121 more rows]
[truncated: 359 more columns]

## Sheet: e) Detection per sample group
bins	proportion of healthy samples genome is detected in	proportion of IBD samples genome is detected in
GCA_000210015_1	0.0131004	0
GCA_000210075_1	0.528384	0.207921
GCA_000210555_1	0.344978	0.0693069
GCA_000285855_2	0.00873362	0
GCA_000344275_1	0	0
GCA_000431575_1	0.497817	0.049505
GCA_000431795_1	0.231441	0
GCA_000432135_1	0.388646	0.019802
GCA_000432375_1	0.436681	0.0594059
GCA_000432435_1	0.340611	0
[truncated: 826 more rows]

## Sheet: f) HMI proportion per sample
sample	proportion of detected genomes that are HMI
[truncated: 408 more rows]

[truncated: 2 more sheets: g)Avg mod completion per group, h) HMI score threshold tests]
