# Supplementary material for: Microbes with higher metabolic independence are enriched in human gut microbiomes under stress
Source: eLife journal article supplement (doi:10.7554/elife.89862), 2023-09-08
Supplement: supp4 [file elife-89862-supp4-v1.zip]

## Sheet: a) Previous classifier summary
Study	Papa et al 2012	Gevers et al 2014	Halfvarson et al 2017	Franzosa et al 2019	Reiter et al 2022 pre-print
Study DOI	10.1371/journal.pone.0039242	10.1016/j.chom.2014.02.005	10.1038/nmicrobiol.2017.4	10.1038/s41564-018-0306-4	10.1101/2022.06.30.498290
IBD Subtype	pediatric CD, UC, and undefined IBD	pediatric CD	CD, UC, lympocytic colitis (LC), collagenous colitis (CC)	CD and UC	CD and UC
Cohort details	91 children and young adults from Children’s Hospital in Boston. 23 with CD, 43 with UC, 1 with undefined IBD, 24 with non-IBD functional disease.	RISK cohort: 447 children and adolescents, 3 to 17 years of age with a well-established diagnosis of CD, and 221 control subjects with non-inflammatory conditions (ie, abdominal pain and diarrhea). From 28 pediatric gastroenterology centers in North America.	128 individuals (49 CD, 60 UC, 4 lymphocytic colitis (LC), 15 collagenous colitis (CC)) and 9 healthy controls (HC). Sampling at 3-month intervals for 1-10 samples per individual. From "the outpatient clinic" (perhaps at Uppsala University?). All patients Caucasian.	PRISM cohort from Massachusetts General Hospital in Boston: 155 adult patients (>18 y.o.) diagnosed with CD (n = 68), UC (n = 53), and non-IBD (control, n=34) conditions, with diagnoses based on standard endoscopic, radiographic, and histologic criteria. Validation cohorts: 22 control subjects from the LifeLines-DEEP general population study and 43 (20 CD, 23 UC) subjects with IBD from a study at…	Seven cohorts (from five countries) with publicly-available shotgun metagenomes w/ greater than one million paired-end reads. Treatment-naïve individuals with CD or UC, and healthy controls. For time-series cohorts, only first time point was used. Studies: Lloyd-Price et al 2019, Lewis et al 2015, Qin et al 2010, Hall et al 2017, Franzosa et al 2019, Gevers et al 2014. Many non-IBD controls were …
Cohort size (training data)	91	199 (stool), 300 (rectum), 425 (ileum)	69 individuals (first time point samples)	155	605 (5/6 cohorts used for training in each fold)
Cohort size (validation data)	68	none	69 individuals (remaining three time points)	65	605 (1/6 cohorts used for testing in each fold)
Sample type	fecal samples	ileum and rectum biopsies, fecal samples	fecal samples	fecal samples	fecal samples
Data type	16S amplicon sequences (V3-V5)	16S amplicon sequences (V4)	16S amplicon sequences (V4)	untargeted LC-MS metabolomes, metagenomes	metagenomes
Classifier features	relative abundance of OTUs	genus-level relative abundance of OTUs	OTU abundundance and clinical metadata (BMI, f-calprotectin, sex, distance to healthy plane)	metabolite profiles and species relative abundance profiles (combined and separately)	FracMinHash sketches (sub-sampled k-mer abundance profiles) of metagenomes
Prediction (target) classes	IBD vs non-IBD	CD vs non-CD	IBD subtype	IBD vs non-IBD; and IBD subtype (UC vs CD) vs non-IBD	IBD subtype
Model Type	random forest	logistic regression	random forest	random forest	random forest
Training Strategy	10-fold cross-validation (90%-10% train-test split)	5-fold cross-validation	model was fit without cross-validation	5-fold cross-validation; and training with PRISM cohort + testing on validation cohort	6-fold leave-one-study-out cross-validation
Accuracy	not reported	not reported	66.6	not reported (IBD vs non-IBD); and (IBD subtype) 64–65% (training cohort) and 77% (validation cohort, metabolite classsifier) or 48% (validation cohort, species classifier)	49%-77%
AUROCC	0.84	0.66 (stool), 0.78 (rectum biopsies), 0.85 (ileal biopsies)	not reported	0.86 to 0.92 (IBD vs non-IBD); and not reported (IBD subtype)	not reported
Sensitivity	0.92	not reported	not reported	not reported	not reported
Specificity	0.585	not reported	not reported	not reported	not reported

## Sheet: b)Palleja et al classifications
sample (from Palleja et al)	predicted class	Subject	Day	Low Sequencing Depth
ERAS10_Day0	HEALTHY	ERAS10	Day0	FALSE
ERAS10_Day180	HEALTHY	ERAS10	Day180	FALSE
ERAS10_Day42	HEALTHY	ERAS10	Day42	FALSE
ERAS10_Day8	IBD	ERAS10	Day8	TRUE
ERAS11_Day0	HEALTHY	ERAS11	Day0	FALSE
ERAS11_Day180	HEALTHY	ERAS11	Day180	FALSE
ERAS11_Day42	HEALTHY	ERAS11	Day42	TRUE
ERAS11_Day4opt	HEALTHY	ERAS11	Day4opt	FALSE
ERAS11_Day8	IBD	ERAS11	Day8	TRUE
ERAS12_Day0	HEALTHY	ERAS12	Day0	FALSE
ERAS12_Day180	HEALTHY	ERAS12	Day180	FALSE
ERAS12_Day42	HEALTHY	ERAS12	Day42	TRUE
ERAS12_Day4opt	IBD	ERAS12	Day4opt	TRUE
ERAS12_Day8	HEALTHY	ERAS12	Day8	TRUE
ERAS1_Day0	HEALTHY	ERAS1	Day0	FALSE
ERAS1_Day180	HEALTHY	ERAS1	Day180	FALSE
ERAS1_Day42	HEALTHY	ERAS1	Day42	FALSE
ERAS1_Day8	IBD	ERAS1	Day8	FALSE
ERAS2_Day0	HEALTHY	ERAS2	Day0	FALSE
ERAS2_Day180	HEALTHY	ERAS2	Day180	FALSE
ERAS2_Day42	HEALTHY	ERAS2	Day42	FALSE
ERAS2_Day4opt	IBD	ERAS2	Day4opt	FALSE
ERAS2_Day8	HEALTHY	ERAS2	Day8	FALSE
ERAS3_Day0	HEALTHY	ERAS3	Day0	FALSE
ERAS3_Day180	IBD	ERAS3	Day180	FALSE
ERAS3_Day4	HEALTHY	ERAS3	Day4	FALSE
ERAS3_Day42	IBD	ERAS3	Day42	FALSE
ERAS3_Day8	IBD	ERAS3	Day8	FALSE
ERAS4_Day0	HEALTHY	ERAS4	Day0	FALSE
ERAS4_Day180	HEALTHY	ERAS4	Day180	FALSE
ERAS4_Day42	HEALTHY	ERAS4	Day42	FALSE
ERAS4_Day4opt	HEALTHY	ERAS4	Day4opt	FALSE
ERAS4_Day8opt	IBD	ERAS4	Day8opt	FALSE
ERAS5_Day0	HEALTHY	ERAS5	Day0	FALSE
ERAS5_Day180	HEALTHY	ERAS5	Day180	FALSE
ERAS5_Day4	HEALTHY	ERAS5	Day4	FALSE
ERAS5_Day42	IBD	ERAS5	Day42	FALSE
ERAS5_Day8	IBD	ERAS5	Day8	FALSE
ERAS6_Day0	HEALTHY	ERAS6	Day0	TRUE
ERAS6_Day180	HEALTHY	ERAS6	Day180	FALSE
ERAS6_Day42	HEALTHY	ERAS6	Day42	FALSE
ERAS6_Day4opt	HEALTHY	ERAS6	Day4opt	FALSE
ERAS6_Day8opt	IBD	ERAS6	Day8opt	FALSE
ERAS7_Day0	HEALTHY	ERAS7	Day0	FALSE
ERAS7_Day180	HEALTHY	ERAS7	Day180	FALSE
ERAS7_Day42	IBD	ERAS7	Day42	FALSE
ERAS7_Day4opt	IBD	ERAS7	Day4opt	FALSE
ERAS7_Day8	IBD	ERAS7	Day8	FALSE
ERAS8_Day0	HEALTHY	ERAS8	Day0	FALSE
ERAS8_Day180	HEALTHY	ERAS8	Day180	FALSE
ERAS8_Day42	HEALTHY	ERAS8	Day42	FALSE
ERAS8_Day8	IBD	ERAS8	Day8	FALSE
ERAS9_Day0	HEALTHY	ERAS9	Day0	FALSE
ERAS9_Day180	HEALTHY	ERAS9	Day180	FALSE
ERAS9_Day4	HEALTHY	ERAS9	Day4	FALSE
ERAS9_Day42	IBD	ERAS9	Day42	FALSE
ERAS9_Day8	IBD	ERAS9	Day8	FALSE

## Sheet: c) Classifer Train-Test Summary
Train-test strategy	Random split Cross-Validation	Leave-2-out Cross-Validation	No (Le Chatelier et al) or (Vineis et al) data Cross-Validation	Final PPCN Classifier
Training data	80% randomly-selected samples from 330 deeply-sequenced healthy and IBD metagenomes (n = 264)	All samples not from the two left-out studies	80% randomly-selected samples from 115 deeply-sequenced metagenomes, not including samples from Le Chatelier et al 2013 or Vineis et al 2016 (n = 92)	all 330 deeply-sequenced healthy and IBD metagenomes
Testing data	remaining 20% of samples (n = 66)	Samples from the left-out IBD study and healthy study	Remaining 20% of samples (n = 23)	NA (but see performance on Palleja et al antibiotic time series samples)
Feature data	PPCN of modules enriched in IBD training samples	PPCN of modules enriched in IBD training samples	PPCN of 33 IBD-enriched modules identified from all 330 deeply-sequenced healthy and IBD samples	PPCN of 33 IBD-enriched modules identified from all 330 deeply-sequenced healthy and IBD samples
Number of CV folds	25	24	10	NA
Average fold accuracy	0.856364	0.601193	0.665217	NA
Average fold ROC AUC	0.83192	0.588694	0.652112	NA
Average fold F1 score	0.762075	0.431623	0.532278	NA
Average fold True healthy rate (specificity)	0.895731	0.757098	0.694238	NA
Average fold True IBD rate (sensitivity)	0.768108	0.42029	0.609986	NA

## Sheet: d) Random split CV (25-fold)
Cross-validation fold number	0	1	2	3	4	5	6	7	8	9	10	11	12	13	14	15	16	17	18	19	20	21	22	23	24
Number of test samples	66	66	66	66	66	66	66	66	66	66	66	66	66	66	66	66	66	66	66	66	66	66	66	66	66
Number of healthy test samples	50	46	50	47	46	52	46	53	40	47	50	44	44	41	47	39	44	45	40	43	45	46	48	47	48
Number of IBD test samples	16	20	16	19	20	14	20	13	26	19	16	22	22	25	19	27	22	21	26	23	21	20	18	19	18
Number of training samples	264	264	264	264	264	264	264	264	264	264	264	264	264	264	264	264	264	264	264	264	264	264	264	264	264
Number of healthy training samples	179	183	179	182	183	177	183	176	189	182	179	185	185	188	182	190	185	184	189	186	184	183	181	182	181
Number of IBD training samples	85	81	85	82	81	87	81	88	75	82	85	79	79	76	82	74	79	80	75	78	80	81	83	82	83
Effect size threshold for IBD-enriched modules	0.057006	0.055536	0.057905	0.051696	0.057638	0.054046	0.053497	0.051762	0.061677	0.059305	0.058385	0.051638	0.050932	0.055998	0.057667	0.055341	0.055744	0.05999	0.051969	0.053883	0.055206	0.058919	0.058034	0.05842	0.061581
Number of IBD-enriched modules	43	42	46	42	44	46	43	40	50	48	48	39	37	41	48	43	44	48	37	40	45	48	47	45	50
Accuracy	0.909091	0.909091	0.848485	0.848485	0.878788	0.863636	0.818182	0.939394	0.848485	0.818182	0.712121	0.848485	0.909091	0.924242	0.863636	0.818182	0.863636	0.772727	0.909091	0.909091	0.80303	0.893939	0.878788	0.787879	0.833333
ROC AUC	0.8975	0.906522	0.7725	0.799552	0.856522	0.835165	0.798913	0.904209	0.821154	0.762598	0.6825	0.829545	0.875	0.907805	0.857223	0.806268	0.840909	0.744444	0.891346	0.91001	0.779365	0.867391	0.864583	0.788354	0.798611
F1 score	0.823529	0.857143	0.666667	0.722222	0.8	0.709677	0.714286	0.846154	0.782609	0.666667	0.512821	0.772727	0.85	0.893617	0.780488	0.769231	0.790698	0.651163	0.875	0.875	0.697674	0.820513	0.789474	0.681818	0.702703
True Healthy classifications (of healthy samples)	46	42	46	43	42	46	39	51	38	42	37	39	43	40	41	34	40	37	39	39	38	43	43	37	42
False IBD classifications (of healthy samples)	4	4	4	4	4	6	7	2	2	5	13	5	1	1	6	5	4	8	1	4	7	3	5	10	6
False Healthy classifications (of IBD samples)	2	2	6	6	4	3	5	2	8	7	6	5	5	4	3	7	5	7	5	2	6	4	3	4	5
True IBD classifications (of IBD samples)	14	18	10	13	16	11	15	11	18	12	10	17	17	21	16	20	17	14	21	21	15	16	15	15	13
True IBD Rate	0.875	0.9	0.625	0.684211	0.8	0.785714	0.75	0.846154	0.692308	0.631579	0.625	0.772727	0.772727	0.84	0.842105	0.740741	0.772727	0.666667	0.807692	0.913043	0.714286	0.8	0.833333	0.789474	0.722222
True Healthy Rate	0.92	0.913043	0.92	0.914894	0.913043	0.884615	0.847826	0.962264	0.95	0.893617	0.74	0.886364	0.977273	0.97561	0.87234	0.871795	0.909091	0.822222	0.975	0.906977	0.844444	0.934783	0.895833	0.787234	0.875

## Sheet: e) Leave 2 out CV (24-fold)
Cross-validation fold number	0	1	2	3	4	5	6	7	8	9	10	11	12	13	14	15	16	17	18	19	20	21	22	23
Left-out healthy study (used for testing)	Chatelier_2013	Chatelier_2013	Chatelier_2013	Chatelier_2013	Feng_2015	Feng_2015	Feng_2015	Feng_2015	Raymond_2015	Raymond_2015	Raymond_2015	Raymond_2015	University_of_Sydney_2016	University_of_Sydney_2016	University_of_Sydney_2016	University_of_Sydney_2016	Wen_2017	Wen_2017	Wen_2017	Wen_2017	Xie_2016	Xie_2016	Xie_2016	Xie_2016
Left-out IBD study (used for testing)	Franzosa_2018	Lloyd-Price_2019	Schirmir_2018	Vineis_2016	Franzosa_2018	Lloyd-Price_2019	Schirmir_2018	Vineis_2016	Franzosa_2018	Lloyd-Price_2019	Schirmir_2018	Vineis_2016	Franzosa_2018	Lloyd-Price_2019	Schirmir_2018	Vineis_2016	Franzosa_2018	Lloyd-Price_2019	Schirmir_2018	Vineis_2016	Franzosa_2018	Lloyd-Price_2019	Schirmir_2018	Vineis_2016
Number of test samples	181	154	155	215	59	32	33	93	52	25	26	86	38	11	12	72	47	20	21	81	32	5	6	66
Number of healthy test samples	151	151	151	151	29	29	29	29	22	22	22	22	8	8	8	8	17	17	17	17	2	2	2	2
Number of IBD test samples	30	3	4	64	30	3	4	64	30	3	4	64	30	3	4	64	30	3	4	64	30	3	4	64
Number of training samples	149	176	175	115	271	298	297	237	278	305	304	244	292	319	318	258	283	310	309	249	298	325	324	264
Number of healthy training samples	78	78	78	78	200	200	200	200	207	207	207	207	221	221	221	221	212	212	212	212	227	227	227	227
Number of IBD training samples	71	98	97	37	71	98	97	37	71	98	97	37	71	98	97	37	71	98	97	37	71	98	97	37
Effect size threshold for IBD-enriched modules	0.037143	0.030982	0.03179	0.017464	0.062662	0.056501	0.057308	0.042982	0.067257	0.061096	0.061903	0.047577	0.062581	0.05642	0.057227	0.042901	0.065163	0.059002	0.05981	0.045484	0.063086	0.056925	0.057732	0.043406
Number of IBD-enriched modules	25	29	30	0	49	51	51	4	47	51	53	2	46	49	49	1	46	52	53	2	46	50	50	1
Accuracy	0.834254	0.915584	0.948387	NaN	0.610169	0.1875	0.151515	0.774194	0.634615	0.52	0.5	0.593023	0.552632	0.636364	0.583333	0.541667	0.680851	0.8	0.666667	0.765432	0.53125	0.4	0.5	0.5
ROC AUC	0.646909	0.466887	0.730132	NaN	0.610345	0.252874	0.193966	0.769935	0.665152	0.439394	0.602273	0.666903	0.625	0.541667	0.5	0.742188	0.72451	0.607843	0.411765	0.808364	0.75	0.416667	0.625	0.742188
F1 score	0.423077	0	0.333333	NaN	0.610169	0.071429	0.066667	0.826446	0.595745	0.142857	0.315789	0.653465	0.638298	0.333333	0.285714	0.652632	0.693878	0.333333	0	0.831858	0.666667	0.4	0.4	0.652632
True Healthy classifications (of healthy samples)	140	141	145	NaN	18	5	4	22	19	12	10	18	6	6	6	8	15	15	14	15	2	1	2	2
False IBD classifications (of healthy samples)	11	10	6	NaN	11	24	25	7	3	10	12	4	2	2	2	0	2	2	3	2	0	1	0	0
False Healthy classifications (of IBD samples)	19	3	2	NaN	12	2	3	14	16	2	1	31	15	2	3	33	13	2	4	17	15	2	3	33
True IBD classifications (of IBD samples)	11	0	2	NaN	18	1	1	50	14	1	3	33	15	1	1	31	17	1	0	47	15	1	1	31
True IBD Rate	0.366667	0	0.5	NaN	0.6	0.333333	0.25	0.78125	0.466667	0.333333	0.75	0.515625	0.5	0.333333	0.25	0.484375	0.566667	0.333333	0	0.734375	0.5	0.333333	0.25	0.484375
True Healthy Rate	0.927152	0.933775	0.960265	NaN	0.62069	0.172414	0.137931	0.758621	0.863636	0.545455	0.454545	0.818182	0.75	0.75	0.75	1	0.882353	0.882353	0.823529	0.882353	1	0.5	1	1

## Sheet: f) No Chatelier or Vineis CV 
Cross-validation fold number	0	1	2	3	4	5	6	7	8	9
Number of test samples	23	23	23	23	23	23	23	23	23	23
Number of healthy test samples	14	13	12	16	17	11	16	17	16	16
Number of IBD test samples	9	10	11	7	6	12	7	6	7	7
Number of training samples	92	92	92	92	92	92	92	92	92	92
Number of healthy training samples	64	65	66	62	61	67	62	61	62	62
Number of IBD training samples	28	27	26	30	31	25	30	31	30	30
Accuracy	0.782609	0.695652	0.652174	0.521739	0.652174	0.521739	0.782609	0.695652	0.695652	0.652174
ROC AUC	0.781746	0.719231	0.651515	0.575893	0.495098	0.530303	0.803571	0.794118	0.620536	0.549107
F1 score	0.736842	0.72	0.636364	0.47619	0.2	0.421053	0.705882	0.631579	0.461538	0.333333
True Healthy classifications (of healthy samples)	11	7	8	7	14	8	12	10	13	13
False IBD classifications (of healthy samples)	3	6	4	9	3	3	4	7	3	3
False Healthy classifications (of IBD samples)	2	1	4	2	5	8	1	0	4	5
True IBD classifications (of IBD samples)	7	9	7	5	1	4	6	6	3	2
True IBD Rate	0.777778	0.9	0.636364	0.714286	0.166667	0.333333	0.857143	1	0.428571	0.285714
True Healthy Rate	0.785714	0.538462	0.666667	0.4375	0.823529	0.727273	0.75	0.588235	0.8125	0.8125
