# Supplementary material for: Microbes with higher metabolic independence are enriched in human gut microbiomes under stress
Source: eLife journal article supplement (doi:10.7554/elife.89862), 2023-09-08
Supplement: supp5 [file elife-89862-supp5-v1.zip]

## Sheet: Sheet1
Software	Software category	Reconstruction strategy (output examples)	Annotation sources	Pathway sources	Calculation summary	Input types	Output types	Additional capabilities	Reference	Open-source?	Program type	Languages	Code or Webpage
anvi-estimate-metabolism	standalone	pathway prediction (presence, completeness, copy number)	any (default is KEGG)	KEGG MODULE (default), user-defined	stepwise completeness = # steps with annotation / total # steps. pathwise completeness = max(# annotated enzymes / total # enzymes in path) taken over all possible alternative paths. for copy number calculations see anvio.org/help/main/programs/anvi-estimate-metabolism	Individual genomes, binned or unbinned metagenomes	text files	integrated with all anvi'o capabilities (including interactive interface for visualization, coverage/detection information, etc)	This study. Also see documentation: anvio.org/help/main/programs/anvi-estimate-metabolism	Yes	Command line program w/ interactive visualization capabilities	Python, Javascript	https://github.com/merenlab/anvio
Pathway Tools	server	both modeling and pathway prediction (pathway-genome database)	any (Genbank/GFF file)	BioCyc/MetaCyc PGDB	sum(reaction scores) / number of reactions, where reaction score depends on enzyme presence, reaction uniqueness, and whether reaction is a key reaction	Individual genomes, unbinned metagenomes	PGDB, text files, figures, abundances of pathways present in unbinned metagenome	Numerous: operon prediction, transporter prediction, missing enzyme prediction, genome/pathway editing, FBA, etc	https://arxiv.org/abs/1510.03964v4	No	Desktop application or Web server	Common Lisp	http://bioinformatics.ai.sri.com/ptools/
METABOLIC	standalone	pathway prediction (presence, completeness)	KEGG KOfam (July 2019), TIGRfam 15.0, Pfam 32.0, dbCAN, MEROPS peptidase protein sequences, custom HMMs	KEGG MODULE	# present enzymes / # enzymes in module; not sure how they handle different paths through module	Individual genomes, metagenomic reads	Excel sheet, text files, figures	Visualization of biogeochemical cycles, read recruitment and computation of individual genome contribution to pathways (community analysis)	https://doi.org/10.1186/s40168-021-01213-8	Yes	Command line program	Perl, R	https://github.com/AnantharamanLab/METABOLIC
CarveMe	standalone	modeling (GSMM)	BiGG	BiGG	carves universal model (top-down) by solving mixed integer linear program to maximize presence of high-score reactions and minimize of low-score reactions	Gene sequences from Individual genomes	SBML files	Gap-filling based on growth capabilities, merge individual models into community model	https://doi.org/10.1093/nar/gky537	Yes	Command line program	Python	https://github.com/cdanielmachado/carveme
MinPath	standalone	pathway prediction (list of pathways)	any (protein families)	KEGG, MetaCyc	finds minimal set of pathways that include all input functions using integer programming	List of protein families (from genomes or metagenomes)	List of pathways	N/A	https://doi.org/10.1371/journal.pcbi.1000465	Yes	Web server	Python	https://github.com/mgtools/MinPath
RAST/SEED	server	both modeling (GSMM) and pathway prediction (categories of functions)	FIGfam	SEED	assigns genes to a metabolism category ("subsystem") and produces a metabolic reaction network using SEED	Individual genomes	Tables, figures	N/A	https://bmcgenomics.biomedcentral.com/articles/10.1186/1471-2164-9-75	No	Web server	?	https://rast.nmpdr.org/
KAAS	server	pathway prediction (pathway map with highlights on annotated genes)	KEGG GENES	KEGG PATHWAY	highlights annotated genes in the pathway map	Gene sequences from Individual genomes or unbinned metagenomes	Interactive Map	N/A	https://doi.org/10.1093%2Fnar%2Fgkm321	No	Web server	?	https://www.genome.jp/kegg/kaas/
DRAM	standalone	pathway prediction (completeness)	KEGG Genes/Kofam, Pfam, Uniref90, MEROPS, dbCAN, VOGDB	KEGG MODULE, user-defined metabolism submitted and vetted by DRAM team	Percent of steps present in module (does not consider subpaths, only top-level steps; and step is 'present' if at least one gene is present in at least one path in the step)	Individual genomes, binned metagenomes (MAGs)	Excel sheets, text and HTML files	Works on viral MAGs, heatmaps for specific modules	https://doi.org/10.1093/nar/gkaa621	Yes	Command line program	Python	https://github.com/WrightonLabCSU/DRAM
KBase	pipeline & server	both modeling and pathway prediction. includes apps to run DRAM, ModelSEED, RAST, etc	variable	variable	variable	Individual genomes	variable	Gap-filling, FBA	https://doi.org/10.1038/nbt.4163	Yes	Web server	Python, Perl, Java	https://github.com/kbase, https://www.kbase.us/
KEMET	pipeline/standalone	both modeling and pathway prediction. uses CarveMe internally for modeling, has original code for completeness estimation	KEGG Brite/GENES	KEGG (custom files)	number of blocks in a Module is given by the highest number of individual KOs involved in any alternative reaction path	Individual genomes	text files, SBML files	Gap-filling via auto-generated HMMs	https://www.sciencedirect.com/science/article/pii/S2001037022000903#!	Yes	Command line program	Python	https://github.com/Matteopaluh/KEMET
metaPathPredict	standalone	pathway prediction (presence)	KEGG Orthologs	KEGG MODULE	if module is not 100% complete based on presence of all KOs (or at least one of alternative sets of KOs), runs ensemble neural network to predict presence/absence of the module	List of annotated KOs for individual genome	List of pathway presence/absence (or probabilities)	Gap-filling based on model predictions	https://www.biorxiv.org/content/10.1101/2022.12.21.521254v2	Yes	Command line program; R package	R	https://github.com/d-mcgrath/MetaPathPredict
metaGEM	pipeline	modeling (GSMM). uses CarveMe internally	BiGG (used by CarveMe)	BiGG (used by CarveMe)	see CarveMe	MAGs binned from input metagenomes	SBML files	combines tools for assembly, read recruitment, automatic binning, annotation, metabolic interaction prediction, etc. See paper.	https://doi.org/10.1093/nar/gkab815	Yes	Command line program	Snakemake	https://github.com/franciscozorrilla/metaGEM
gapseq	standalone	both modeling (GSMM) and pathway prediction (presence,completeness)	Uniprot, TCDB, ModelSeed	KEGG, MetaCyc, ModelSEED	a pathway or subsystem is considered to be present if at least 80% of the reactions are found (threshold is lower if all key reactions are found or some reactions have no associated sequence data); A draft genome-scale metabolic model is constructed based on the results from the pathway and transporter predictions	Individual genomes	text files, SBML or RDS files	Gap-filling, validation with phenotype data, transporter prediction	https://doi.org/10.1186/s13059-021-02295-1	Yes	Command line program	R, BASH	https://github.com/jotech/gapseq
ModelSEED	pipeline & server	modeling (GSMM). uses RAST/SEED internally	FIGfam (used by RAST)	SEED	model is generated bottom-up from intracellular and transport reactions annotated by RAST	Individual genomes	SBML files, ModelSEED format files	Gap-filling, FBA, integration of Biolog phenotyping/gene essentiality data	https://doi.org/10.1038/nbt.1672	No	Web server	?	https://modelseed.org/
RAVEN	standalone (package)	modeling (GSMM)	KEGG, MetaCyc	KEGG, MetaCyc	models generated bottom-up from either MetaCyc data or KEGG data (resulting draft models be combined)	Individual genomes	SBML, Excel, or COBRA files	FBA, flux scanning	https://doi.org/10.1371/journal.pcbi.1006541	Yes	Package	MATLAB	https://github.com/SysBioChalmers/RAVEN
AuReMe	pipeline	modeling (GSMM). uses CobraPy, Pantograph, PSAMM, etc internally	BiGG, Seed, MetaCyc, KEGG (if licensed by user)	BiGG, Seed, MetaCyc, KEGG (if licensed by user)	see papers for included reconstruction tools	Individual genomes	SBML files, RDF databases	Gap-filling, FBA, generates wiki for visualization	https://doi.org/10.1371/journal.pcbi.1006146	Yes	Command line program	Python	http://aureme.genouest.org/
merlin	standalone	modeling (GSMM)	KEGG	KEGG	model is generated bottom-up from KEGG annotations	Individual genomes	SBML files	Transporter annotation	https://doi.org/10.1093/nar/gkv294	Yes	Desktop application	Java	http://www.merlin-sysbio.org/
	Category Key
	standalone = uses original code for metabolism reconstruction. you download the tool and run it on your data.
	pipeline = primarily runs other software internally (ie, not using original code for metabolism reconstruction). you download the tool and run it on your data.
	server = uses original code for metabolism reconstruction. you upload your data to the server to get results.
	pipeline & server = primarily runs other software internally (ie, not using original code for metabolism reconstruction). you upload your data to the server to get results.
	package = provides original code for metabolism reconstruction as methods that you incorporate into your own code.
