# Supplementary material for: Microbes with higher metabolic independence are enriched in human gut microbiomes under stress
Source: eLife journal article supplement (doi:10.7554/elife.89862), 2023-09-08
Supplement: supp6 [file elife-89862-supp6-v1.zip]

## Sheet: a) Distributions
	ALL MODULES				ENRICHED MODULES (n=33)
	PPCN - avg completeness		PPCN - avg copy number		PPCN - avg completeness		PPCN - avg copy number		Community Size Estimates
	Mean	Std-dev	Mean	Std-dev	Mean	Std-dev	Mean	Std-dev	Proportion correct	Proportion within 1	Proportion within 2
Genome Size (Ideal)	-0.103159	0.197591	0.0577592	0.104522	-0.0152561	0.188633	0.176162	0.137845	0.449735	0.751323	0.904762
Genome Size (Realistic)	-0.117796	0.185467	0.043122	0.111805	-0.0476182	0.202006	0.1438	0.153308	0.0846561	0.375661	0.666667
Community Size (Ideal)	-0.128407	0.219377	0.0514862	0.104032	-0.0503239	0.212415	0.141183	0.146589	0.625	0.816667	0.958333
Diversity (Ideal)	-0.119	0.177139	0.0580132	0.106547	-0.0588759	0.180408	0.170386	0.130833	0.14	0.59	0.9

## Sheet: b) Correlations
			ALL MODULES						ENRICHED MODULES (n=33)						Community Size Estimates
			PPCN		PPCN - avg completeness		PPCN - avg copy number		PPCN		PPCN - avg completeness		PPCN - avg copy number		Accuracy
	Correlation with	genome sizes in sample	R	p <=	R	p <=	R	p <=	R	p <=	R	p <=	R	p <=	R	p <=
Genome Size (Ideal)	proportion of genomes from smaller size category in community	S vs M	-0.066	2.2e-16	0.04	6.5e-08	-0.015	0.046	-0.36	2.2e-16	-0.026	0.22	-0.079	0.00016	-0.36	0.0024
		S vs L	-0.087	2.2e-16	0.067	2.2e-16	0.049	4.9e-12	-0.48	2.2e-16	-0.13	2.2e-10	-0.015	0.49	-0.71	6.7e-12
		M vs L	-0.026	0.00019	0.017	0.013	0.039	1.2e-08	-0.21	2.2e-16	-0.098	2.9e-06	0.038	0.071	-0.37	0.0016
Genome Size (Realistic)	proportion of genomes from smaller size category in community	S vs M	-0.059	1.5e-15	0.07	2.2e-16	0.015	0.046	-0.33	2.2e-16	0.053	0.012	0.00076	0.97	-0.57	3.3e-07
		S vs L	-0.085	2.2e-16	0.11	2.2e-16	0.059	2.2e-16	-0.46	2.2e-16	-0.045	0.032	0.025	0.23	-0.55	1e-06
		M vs L	-0.027	7.7e-05	0.031	9e-06	0.039	2.3e-08	-0.18	2.2e-16	-0.064	0.0023	0.03	0.16	0.14	0.24
Community Size	number of microbial populations in community	S	0.037	0.00072	0.16	2.2e-16	0.13	2.2e-16	0.06	0.031	0.17	4.3e-10	0.24	2.2e-16	-0.69	9.5e-07
		M	0.013	0.19	0.14	2.2e-16	0.16	2.2e-16	0.036	0.2	0.16	6e-09	0.25	2.2e-16	-0.61	2.8e-05
		L	0.016	0.074	0.079	2.2e-16	0.092	2.2e-16	0.083	0.0026	0.11	8.1e-05	0.18	1.7e-10	NA	NA
Diversity	number of phyla	NA	0.033	1.1e-07	0.037	2e-09	0.027	1.1e-05	0.069	7.7e-05	0.038	0.028	0.063	0.00034	0.071	0.49

## Sheet: c)Gut_Normalized_Rel_Abundances
GupDM_HAK	GupDM_HAJ	GupDM_HAI	GupDM_HAH	GupDM_HAG	GupDM_HAL	GupDM_HAM	GupDM_HAN	GupDM_HAO	GupDM_HAP	GupDM_HAT	GupDM_HDF	GupDM_HDB	GupDM_HCY	GupDM_HCL	GupDM_HCU	GupDM_HCV	GupDM_HCQ	GupDM_HCR	GupDM_HCS	GupDM_HCT	GupDM_HCM	GupDM_HCN	GupDM_HCO	GupDM_HCP	GupDM_HP	GupDM_HS	GupDM_HR	GupDM_HBR	CCIS00146684ST-4-0	CCIS00281083ST-3-0	CCIS02124300ST-4-0	CCIS02856720ST-4-0	CCIS03473770ST-4-0	CCIS03857607ST-4-0	CCIS05314658ST-4-0	CCIS07277498ST-4-0	CCIS07539127ST-4-0	CCIS07648107ST-4-0	CCIS09568613ST-4-0	CCIS10706551ST-3-0	CCIS11354283ST-4-0	CCIS11362406ST-4-0	CCIS11558985ST-4-0	CCIS13047523ST-4-0	CCIS15794887ST-4-0	CCIS16326685ST-4-0	CCIS16383318ST-4-0	CCIS16561622ST-4-0	CCIS20795251ST-4-0
87.2431	87.2431	87.2431	87.2431	87.2431	87.2431	87.2431	87.2431	87.2431	87.2431	87.2431	87.2431	87.2431	87.2431	87.2431	87.2431	87.2431	87.2431	87.2431	87.2431	87.2431	87.2431	87.2431	87.2431	87.2431	87.2431	87.2431	87.2431	87.2431	87.2431	87.2431	87.2431	87.2431	87.2431	87.2431	87.2431	87.2431	87.2431	87.2431	87.2431	87.2431	87.2431	87.2431	87.2431	87.2431	87.2431	87.2431	87.2431	87.2431	87.2431
10.9261	84.5201	11.7863	10.9128	8.72923	60.508	45.424	27.6209	40.099	1.62141	15.4404	70.2234	43.6763	22.4546	8.14477	55.4966	7.39132	42.4257	10.3408	46.095	51.3671	3.31802	80.5878	7.9357	22.2671	28.0412	10.9803	7.17769	46.2442	77.9807	6.80496	77.5648	49.4787	70.3073	50.94	58.3485	76.3138	25.1624	81.7238	48.2108	56.6088	69.6224	41.2405	22.3085	67.8999	42.9809	80.8677	78.0329	68.4513	65.5658
10.3161	43.8716	8.21411	4.18888	3.0267	30.5447	43.383	18.3152	36.2183	1.5315	10.8558	44.0965	13.8863	18.5171	4.79562	54.2221	5.12101	31.722	8.97346	11.3335	32.0404	1.8026	51.7432	6.06398	16.8289	26.6515	9.38495	7.15618	16.2096	71.3149	6.00442	74.011	33.0216	63.0803	49.8619	49.6676	70.5728	19.9317	79.0188	42.2687	35.5225	52.3122	34.1429	20.5007	54.7336	41.914	74.0307	49.6223	58.9476	44.9811
10.1136	37.0722	4.17206	2.66635	1.74242	24.8166	35.4413	15.9857	34.6079	1.27129	10.8401	29.6876	12.9129	11.6859	3.16373	28.7375	1.78339	15.3754	8.92173	10.319	30.5805	1.55567	27.2728	1.54378	15.1398	6.42038	5.81123	4.07506	15.6602	70.7967	4.01425	57.4539	21.1116	52.7146	46.4137	46.8275	70.4603	19.2337	55.7419	32.5193	25.1221	51.1965	33.3519	18.554	49.2927	36.3119	59.5028	48.7562	49.982	39.7103
9.35908	33.3808	3.12474	1.52376	1.73028	16.3529	34.6078	14.2003	23.5768	1.14083	7.77317	9.54278	11.0381	9.05705	2.86573	16.3921	0.875345	8.21082	8.62151	6.49061	11.4359	1.47578	25.8593	0.710263	13.7699	5.44727	3.54968	2.15291	13.082	61.5618	3.7828	38.4757	17.6355	51.4878	45.9252	41.4969	40.1532	18.2913	44.2592	31.5715	25.1008	41.1479	30.9119	9.62069	33.5725	30.7907	54.2223	26.5218	41.9842	38.3492
5.2262	20.185	2.58326	0.704401	1.65297	16.2333	32.6099	11.2043	13.7352	1.01025	7.30972	9.31559	10.8683	5.04745	2.76332	8.51991	0.548471	7.81499	8.25231	6.48097	10.0144	1.33812	20.8911	0.563976	12.9303	4.724	3.29501	1.93981	12.1446	58.6883	2.57149	35.1363	17.2429	48.2292	39.5359	37.7139	31.5649	15.4997	42.3238	27.758	21.3206	40.5354	30.3536	8.48436	30.8593	24.3302	47.7607	21.0979	32.3696	23.797
3.80487	18.6948	2.13721	0.465089	1.08293	16.1024	28.9455	9.8239	12.2875	0.88515	4.88381	8.19761	7.7744	4.00935	0.874112	4.76835	0.475338	7.7818	7.17413	5.83766	8.40108	1.32044	19.2622	0.389843	12.2688	3.89782	2.11633	1.79262	8.61715	47.8105	2.45224	32.7367	16.1172	47.6908	33.9682	36.4287	27.4662	14.4237	37.3285	25.0314	20.2958	31.641	27.1455	8.21563	29.6071	23.3598	37.0106	20.0666	32.0089	22.3138
3.58383	12.5924	1.39025	0.336574	1.06845	14.9586	20.9899	9.38642	6.28086	0.53122	3.82246	5.71469	4.5806	3.86944	0.862202	3.82536	0.404721	7.26855	5.24666	4.36292	7.73248	1.01185	18.9399	0.325207	8.72741	3.39956	2.08252	1.10034	5.26572	47.3349	2.41775	30.5954	16.1103	33.5345	25.8771	34.723	24.5477	14.0405	32.3344	22.4917	16.5548	29.9278	27.1409	8.13826	23.1655	20.6677	30.2345	18.994	29.5442	18.4421
2.82428	12.4617	1.11949	0.320236	0.975405	13.0151	18.9926	8.85323	5.25742	0.50557	3.02709	4.66192	4.57703	2.86184	0.770698	2.68076	0.287309	5.93224	3.74765	3.43513	3.57698	0.915973	18.6107	0.233108	7.08966	3.22381	2.01215	0.910212	5.10039	44.1089	2.18349	22.2321	15.9025	28.3799	25.3178	28.227	21.3375	13.9943	24.5287	20.6452	13.4487	25.0736	24.62	7.80356	19.8282	20.3122	22.4569	17.5727	29.2955	12.422
2.50127	8.70869	1.04436	0.314286	0.742561	10.7332	14.9667	8.65899	4.88144	0.39879	1.32792	2.18579	3.83377	2.69741	0.603026	2.43068	0.253497	5.73312	3.53345	3.42143	2.4231	0.502674	18.5956	0.220443	7.07358	2.71569	1.39936	0.613963	4.4895	38.0298	1.669	21.4157	12.3811	26.9642	20.3931	25.9756	21.0725	13.9704	20.107	19.2182	9.1975	22.8691	22.8826	7.01341	17.9913	19.0184	21.2934	16.079	28.2454	11.725
2.15899	8.69402	0.622135	0.280453	0.657672	10.2825	13.221	6.03422	4.63638	0.38235	1.26027	1.87501	3.82275	2.25302	0.33153	1.99114	0.251873	5.6156	2.68468	3.39715	1.34424	0.469183	14.1672	0.214836	5.36174	2.62465	1.36664	0.470896	4.3477	25.0533	1.44498	21.135	9.05566	25.7896	19.8968	25.8611	19.6164	12.7475	16.2518	18.1494	8.29843	18.7725	21.412	6.93094	17.6207	18.3445	20.5641	15.7984	24.8931	11.0564
2.15647	6.68957	0.58333	0.251268	0.540513	9.43759	7.37469	5.19547	3.32994	0.34387	0.981763	1.62273	3.68348	2.16463	0.246801	1.62042	0.211225	5.25801	1.73561	1.92322	1.1538	0.229859	10.4296	0.159037	5.35658	1.42517	1.13913	0.438937	3.73448	24.7669	1.40285	18.2198	8.46255	25.6658	18.9447	12.6665	18.4592	12.4723	15.9688	16.9191	3.46364	14.638	21.1966	6.47007	14.6475	18.1219	19.1902	14.4196	24.1867	10.975
0.917587	6.01314	0.496731	0.2273	0.504698	9.33447	7.07405	5.18933	3.07556	0.28092	0.895755	1.43526	2.29701	2.11931	0.19568	0.700026	0.149578	4.60791	1.53797	1.87485	0.851341	0.220073	9.47352	0.153344	4.14018	1.42456	0.963629	0.406479	2.01954	23.3198	1.31885	14.8949	7.59399	21.9017	12.6271	11.9786	18.0074	12.0758	15.8334	14.4098	3.00866	14.5725	18.0496	5.12331	12.0672	16.9946	17.0624	13.4186	24.1545	8.8531
0.708396	5.82752	0.450196	0.227045	0.452743	8.56774	6.71457	4.40508	2.65857	0.27141	0.841689	1.11528	2.12787	2.07318	0.182166	0.412403	0.144323	4.43812	1.48742	1.77539	0.757375	0.217954	9.35042	0.128803	3.76364	1.20082	0.922302	0.370187	1.87228	21.1039	1.31434	14.6856	7.45011	21.4442	10.5065	9.79648	17.1554	11.6912	15.3404	12.8192	3.00727	13.8082	17.6057	4.89579	10.2654	16.9347	14.7481	11.2033	19.1431	8.71561
0.662605	5.21152	0.283623	0.199685	0.421171	6.44788	6.01104	4.0004	2.11918	0.23413	0.831514	1.09951	1.3347	1.66615	0.175266	0.177737	0.133187	3.81383	1.2562	1.70189	0.550397	0.175473	9.04051	0.114731	3.58727	0.924646	0.755454	0.332185	1.24964	18.5573	1.24177	14.4712	7.42115	18.489	10.0553	8.96129	13.3566	10.5686	13.8195	12.415	2.71877	13.105	17.5201	4.23828	8.96018	16.5009	14.0911	10.5267	13.7648	8.15601
0.64893	5.1828	0.265797	0.176506	0.366559	5.6309	5.20233	2.99384	1.61669	0.2237	0.666558	0.593434	1.1507	1.20521	0.165133	0.150191	0.111064	3.70306	1.1496	1.20378	0.475832	0.163858	8.77234	0.0996994	3.5236	0.870475	0.702107	0.319209	1.18304	17.2082	1.05502	13.5379	6.92269	17.6959	10.0239	8.89714	12.5464	10.4906	11.5666	12.0512	2.57897	11.5433	16.2044	3.58768	6.42298	12.617	13.4551	10.4173	12.9583	6.77551
0.549443	2.75985	0.226675	0.129215	0.299701	4.02405	4.95294	2.14261	1.32162	0.20659	0.651411	0.516605	0.990521	1.19328	0.145767	0.12943	0.0845981	3.33083	1.12586	0.754996	0.460559	0.159384	7.7742	0.0933989	3.42791	0.798073	0.696187	0.289554	0.982791	15.0638	0.96727	13.1018	6.55398	16.8838	9.33226	8.72689	12.2616	9.98503	11.3164	11.5884	2.4176	11.3883	15.3125	3.46092	5.09911	12.0184	11.37	8.77781	12.6521	5.9269
0.449366	2.67502	0.199224	0.129004	0.207665	3.48422	4.18015	1.6324	1.22509	0.20398	0.621133	0.490873	0.97093	1.17509	0.0991438	0.125565	0.0826024	3.04379	1.06091	0.725664	0.370494	0.140763	6.49663	0.0657129	3.12786	0.567865	0.437875	0.288734	0.863793	11.6304	0.966333	10.8375	6.23791	16.4846	7.53007	8.69522	12.1291	9.66029	10.8778	11.0359	2.41599	11.2056	15.2102	3.18093	4.83502	11.7882	10.5046	8.66651	12.3208	4.37796
0.386712	2.60067	0.195626	0.120796	0.196285	3.47883	4.10307	1.38943	1.1596	0.20251	0.467623	0.455513	0.890838	0.924689	0.0702933	0.111643	0.0707869	2.7738	0.864778	0.611472	0.335086	0.134945	6.30594	0.0519286	2.68938	0.430782	0.426342	0.245462	0.853928	11.1803	0.955373	9.86148	5.92518	16.0209	7.45151	8.07397	11.9511	9.59317	10.7087	10.997	2.34784	9.9477	12.8419	2.44331	4.42674	9.62742	9.43254	8.01004	11.0681	4.3277
0.372686	2.41771	0.178868	0.0984743	0.150295	3.40534	3.24537	1.2706	1.09402	0.20004	0.441649	0.260414	0.852015	0.544778	0.0413175	0.0991001	0.0624427	2.7612	0.819921	0.595159	0.319611	0.132641	5.80996	0.043272	2.61881	0.412235	0.412696	0.236985	0.82583	10.2563	0.95109	9.76393	4.32995	15.4417	6.53371	7.43433	10.0485	9.27386	8.58601	10.7107	1.98271	8.53145	12.7916	2.39599	3.23139	9.42251	9.05993	7.96747	10.2193	3.83371
[truncated: 613 more columns]
